# Supplementary material for: Inter-cellular CRISPR screens reveal regulators of cancer cell phagocytosis
Source: Springer Nature journal article supplement (doi:10.1038/s41586-021-03879-4), 2021-09-08
Supplement: MOESM4 [file 41586_2021_3879_MOESM4_ESM%20(1).xlsx]

## Sheet: Fig 1b
#GeneID	Symbol	GeneInfo	Localization	Process	Function	# elements 1	casTLE Effect 1	casTLE Score 1	# elements 2	casTLE Effect 2	casTLE Score 2	Combo casTLE Effect	Combo casTLE Score	casTLE p-value	Minimum Effect Estimate	Maximum Effect Estimate	10% FDR	5% FDR	1% FDR
ENSG00000196776	CD47	CD47 molecule	plasma membrane|integral component of plasma membrane|extracellular vesicular exosome|	cell adhesion|integrin-mediated signaling pathway|blood coagulation|opsonization|positive regulation of cell proliferation|response to bacterium|positive regulation of cell-cell adhesion|extracellular matrix organization|positive regulation of inflammatory response|positive regulation of phagocytosis|positive regulation of T cell activation|leukocyte migration|	protein binding|thrombospondin receptor activity|	9	-4.4	126	10	-4.1	212	-4.1	338	1e-05	-5.1	-3.5	1	1	1
ENSG00000159921	GNE	glucosamine (UDP-N-acetyl)-2-epimerase/N-acetylmannosamine kinase	cytoplasm|cytosol|	N-acetylglucosamine biosynthetic process|UDP-N-acetylglucosamine metabolic process|N-acetylneuraminate metabolic process|cell adhesion|lipopolysaccharide biosynthetic process|N-acetylneuraminate biosynthetic process|carbohydrate phosphorylation|carbohydrate phosphorylation|	ATP binding|UDP-N-acetylglucosamine 2-epimerase activity|N-acylmannosamine kinase activity|hydrolase activity|metal ion binding|	10	-3.9	132	10	-4.4	190	-4.3	320	1e-05	-5.1	-3.8	1	1	1
ENSG00000111726	CMAS	cytidine monophosphate N-acetylneuraminic acid synthetase	nucleus|membrane|	N-acetylneuraminate metabolic process|lipopolysaccharide biosynthetic process|	N-acylneuraminate cytidylyltransferase activity|	10	-4.8	81.5	10	-4.9	168	-4.8	249	1e-05	-5.7	-3.9	1	1	1
ENSG00000095380	NANS	N-acetylneuraminic acid synthase	cytoplasm|cytosol|extracellular vesicular exosome|	lipopolysaccharide biosynthetic process|	N-acylneuraminate cytidylyltransferase activity|N-acylneuraminate-9-phosphate synthase activity|N-acetylneuraminate synthase activity|	10	-3.2	54.5	10	-3.1	121	-3.2	175	1e-05	-3.9	-2.7	1	1	1
ENSG00000171155	C1GALT1C1	C1GALT1-specific chaperone 1	Golgi membrane|integral component of membrane|extracellular vesicular exosome|	protein O-linked glycosylation|O-glycan processing|post-translational protein modification|cellular protein metabolic process|	polypeptide N-acetylgalactosaminyltransferase activity|protein binding|	10	-3	42.6	10	-3.6	115	-3.5	158	1e-05	-4.4	-2.8	1	1	1
ENSG00000011478	QPCTL	glutaminyl-peptide cyclotransferase-like	Golgi membrane|Golgi apparatus|membrane|integral component of membrane|	proteolysis|peptidyl-pyroglutamic acid biosynthetic process, using glutaminyl-peptide cyclotransferase|	peptidase activity|zinc ion binding|glutaminyl-peptide cyclotransferase activity|	10	-3.7	35.7	10	-3.7	112	-3.7	147	1e-05	-4.6	-2.7	1	1	1
ENSG00000164414	SLC35A1	solute carrier family 35 (CMP-sialic acid transporter), member A1	Golgi membrane|Golgi apparatus|integral component of plasma membrane|	carbohydrate metabolic process|cellular protein modification process|carbohydrate transport|CMP-N-acetylneuraminate transport|proton transport|transmembrane transport|nucleotide transmembrane transport|	sugar:proton symporter activity|CMP-N-acetylneuraminate transmembrane transporter activity|	10	-3.1	44.4	10	-3.7	102	-3.5	145	1e-05	-4.4	-2.8	1	1	1
ENSG00000156738	MS4A1	membrane-spanning 4-domains, subfamily A, member 1	extracellular space|integral component of plasma membrane|external side of plasma membrane|extracellular vesicular exosome|	humoral immune response|B cell proliferation|	epidermal growth factor receptor binding|MHC class II protein complex binding|	10	2.5	46.6	10	2.2	98.3	2.4	144	1e-05	2	3.1	1	1	1
ENSG00000135932	CAB39	calcium binding protein 39	cytosol|protein complex|extracellular vesicular exosome|	cell cycle arrest|insulin receptor signaling pathway|peptidyl-serine phosphorylation|peptidyl-threonine phosphorylation|signal transduction by phosphorylation|activation of protein kinase activity|intracellular signal transduction|protein heterooligomerization|cellular hypotonic response|positive regulation of protein serine/threonine kinase activity|negative regulation of potassium ion transmemb…	protein serine/threonine kinase activity|protein binding|kinase binding|protein kinase activator activity|protein serine/threonine kinase activator activity|	10	-2.5	40.7	9	-3.5	79.7	-2.6	118	1e-05	-4	-2.2	1	1	1
ENSG00000109332	UBE2D3	ubiquitin-conjugating enzyme E2D 3	nucleoplasm|cytosol|plasma membrane|endosome membrane|	negative regulation of transcription from RNA polymerase II promoter|protein polyubiquitination|toll-like receptor signaling pathway|MyD88-independent toll-like receptor signaling pathway|DNA repair|transcription, DNA-templated|transcription initiation from RNA polymerase II promoter|cellular protein modification process|ubiquitin-dependent protein catabolic process|protein monoubiquitination|apo…	ubiquitin-protein transferase activity|protein binding|ATP binding|acid-amino acid ligase activity|	10	-2.9	35	10	-3.2	80.8	-3.2	115	1e-05	-4.1	-2.6	1	1	1
ENSG00000117713	ARID1A	AT rich interactive domain 1A (SWI-like)	nuclear chromatin|nucleus|nucleus|SWI/SNF complex|npBAF complex|nBAF complex|	negative regulation of transcription from RNA polymerase II promoter|neural tube closure|cardiac chamber development|optic cup formation involved in camera-type eye development|nucleosome disassembly|chromatin remodeling|transcription, DNA-templated|regulation of transcription from RNA polymerase II promoter|intracellular estrogen receptor signaling pathway|androgen receptor signaling pathway|for…	DNA binding|DNA binding|transcription coactivator activity|protein binding|ligand-dependent nuclear receptor binding|nucleosome binding|	10	2.6	39.8	10	2	67.8	2.2	106	1e-05	1.8	2.9	1	1	1
ENSG00000114209	PDCD10	programmed cell death 10	Golgi membrane|cytosol|plasma membrane|extracellular vesicular exosome|	angiogenesis|apoptotic process|positive regulation of cell proliferation|negative regulation of apoptotic process|positive regulation of MAP kinase activity|	protein binding|protein homodimerization activity|protein N-terminus binding|	10	-2.5	31.7	10	-3.4	62.8	-3.1	91.9	1e-05	-4.1	-2.3	1	1	1
ENSG00000106392	C1GALT1	core 1 synthase, glycoprotein-N-acetylgalactosamine 3-beta-galactosyltransferase 1	Golgi membrane|integral component of membrane|	angiogenesis|kidney development|O-glycan processing|cell differentiation|post-translational protein modification|cellular protein metabolic process|	protein binding|glycoprotein-N-acetylgalactosamine 3-beta-galactosyltransferase activity|metal ion binding|	10	-3.4	31.3	10	-3.9	52	-3.7	82.4	1e-05	-4.8	-2.7	1	1	1
ENSG00000171862	PTEN	phosphatase and tensin homolog	nucleus|cytoplasm|cytoplasm|mitochondrion|cytosol|plasma membrane|cytoplasmic side of plasma membrane|PML body|myelin sheath adaxonal region|cell projection|neuron projection|dendritic spine|Schmidt-Lanterman incisure|postsynaptic membrane|	regulation of cyclin-dependent protein serine/threonine kinase activity|angiogenesis|negative regulation of protein phosphorylation|regulation of B cell apoptotic process|protein dephosphorylation|protein dephosphorylation|phospholipid metabolic process|phosphatidylinositol biosynthetic process|apoptotic process|activation of mitotic anaphase-promoting complex activity|epidermal growth factor rec…	magnesium ion binding|phosphatidylinositol-3-phosphatase activity|phosphoprotein phosphatase activity|protein serine/threonine phosphatase activity|protein tyrosine phosphatase activity|platelet-derived growth factor receptor binding|protein binding|protein tyrosine/serine/threonine phosphatase activity|lipid binding|anaphase-promoting complex binding|phosphatidylinositol-3,4,5-trisphosphate 3-ph…	10	-2.3	28	10	-2	54.3	-2	81.3	1e-05	-2.7	-1.6	1	1	1
ENSG00000101474	APMAP	adipocyte plasma membrane associated protein	cell surface|membrane|integral component of membrane|extracellular vesicular exosome|	biological_process|biosynthetic process|	arylesterase activity|strictosidine synthase activity|	10	-2.7	32.3	10	-2.3	49.5	-2.5	80.7	1e-05	-3.3	-2	1	1	1
ENSG00000130347	RTN4IP1	reticulon 4 interacting protein 1	mitochondrion|	oxidation-reduction process|	zinc ion binding|oxidoreductase activity|	10	-2.7	26.8	10	-2.7	49.5	-2.7	75.9	1e-05	-3.6	-2.1	1	1	1
ENSG00000156709	AIFM1	apoptosis-inducing factor, mitochondrion-associated, 1	nucleus|nucleus|mitochondrion|mitochondrial inner membrane|mitochondrial intermembrane space|mitochondrial intermembrane space|cytosol|perinuclear region of cytoplasm|	DNA catabolic process|apoptotic DNA fragmentation|apoptotic process|activation of cysteine-type endopeptidase activity involved in apoptotic process|neuron differentiation|chromosome condensation|mitochondrial respiratory chain complex I assembly|positive regulation of apoptotic process|cell redox homeostasis|neuron apoptotic process|oxidation-reduction process|intrinsic apoptotic signaling pathw…	DNA binding|protein binding|electron carrier activity|NAD(P)H oxidase activity|oxidoreductase activity, acting on NAD(P)H|protein dimerization activity|flavin adenine dinucleotide binding|	10	-2.5	15.9	10	-2.8	54.6	-2.7	69.8	1e-05	-3.6	-2	1	1	1
ENSG00000137714	FDX1	ferredoxin 1	mitochondrion|mitochondrial matrix|	steroid biosynthetic process|cholesterol metabolic process|hormone biosynthetic process|small molecule metabolic process|oxidation-reduction process|	iron ion binding|electron carrier activity|2 iron, 2 sulfur cluster binding|	10	-2	17.9	10	-3	53.7	-2.1	69.4	1e-05	-3.4	-1.6	1	1	1
ENSG00000125356	NDUFA1	NADH dehydrogenase (ubiquinone) 1 alpha subcomplex, 1, 7.5kDa	mitochondrion|mitochondrial inner membrane|mitochondrial respiratory chain complex I|mitochondrial respiratory chain complex I|integral component of membrane|mitochondrial membrane|	mitochondrial electron transport, NADH to ubiquinone|respiratory electron transport chain|cellular metabolic process|small molecule metabolic process|	NADH dehydrogenase (ubiquinone) activity|	10	-1.4	15.9	9	-2.6	54.4	-2.4	67	1e-05	-3.1	-1.8	1	1	1
ENSG00000178605	GTPBP6	GTP binding protein 6 (putative)	None	None	GTP binding|metal ion binding|	10	-2.6	7.7	10	-2.6	57.9	-2.6	65.2	1e-05	-3.6	-1.8	1	1	1
ENSG00000110717	NDUFS8	NADH dehydrogenase (ubiquinone) Fe-S protein 8, 23kDa (NADH-coenzyme Q reductase)	mitochondrion|mitochondrial inner membrane|mitochondrial respiratory chain complex I|mitochondrial respiratory chain complex I|mitochondrial respiratory chain complex I|	mitochondrial electron transport, NADH to ubiquinone|response to oxidative stress|respiratory electron transport chain|mitochondrial respiratory chain complex I assembly|cellular metabolic process|small molecule metabolic process|	NADH dehydrogenase activity|NADH dehydrogenase (ubiquinone) activity|NADH dehydrogenase (ubiquinone) activity|metal ion binding|4 iron, 4 sulfur cluster binding|	10	-2.6	35.9	10	-1.6	31.8	-1.9	63.5	1e-05	-3	-1.5	1	1	1
ENSG00000173473	SMARCC1	SWI/SNF related, matrix associated, actin dependent regulator of chromatin, subfamily c, member 1	nuclear chromatin|XY body|nucleus|SWI/SNF complex|protein complex|npBAF complex|nBAF complex|	nucleosome disassembly|chromatin remodeling|transcription, DNA-templated|regulation of transcription from RNA polymerase II promoter|nervous system development|insulin receptor signaling pathway|organ morphogenesis|ATP-dependent chromatin remodeling|positive regulation of transcription, DNA-templated|positive regulation of transcription from RNA polymerase II promoter|	RNA polymerase II core promoter proximal region sequence-specific DNA binding|RNA polymerase II distal enhancer sequence-specific DNA binding|transcription coactivator activity|protein binding|nucleosomal DNA binding|protein N-terminus binding|	10	1.6	15.5	10	1.3	47.4	1.3	61.5	1e-05	1	1.9	1	1	1
ENSG00000136463	TACO1	translational activator of mitochondrially encoded cytochrome c oxidase I	nucleus|mitochondrion|	regulation of translation|	None	10	-1.9	16.2	10	-1.6	44.8	-1.7	60.1	1e-05	-2.3	-1.3	1	1	1
ENSG00000187118	CMC1	C-x(9)-C motif containing 1	mitochondrion|	None	metal ion binding|	10	-1.2	7.56	10	-3.2	54.2	-1.7	58.9	1e-05	-3.7	-1.5	1	1	1
ENSG00000105341	ATP5SL	ATP5S-like	mitochondrion|	None	None	10	-2.2	23.4	10	-1.9	34	-2	56.7	1e-05	-2.7	-1.6	1	1	1
ENSG00000029364	SLC39A9	solute carrier family 39, member 9	integral component of membrane|	zinc ion transport|transmembrane transport|	metal ion transmembrane transporter activity|	10	-2.7	10.4	10	-2.6	46.4	-2.7	56.4	1e-05	-3.6	-1.6	1	1	1
ENSG00000141380	SS18	synovial sarcoma translocation, chromosome 18	nucleus|cytoplasmic microtubule|	microtubule cytoskeleton organization|cell morphogenesis|transcription, DNA-templated|response to drug|positive regulation of transcription from RNA polymerase II promoter|ephrin receptor signaling pathway|	protein binding|ligand-dependent nuclear receptor transcription coactivator activity|	10	1.4	11.6	10	1.2	44.4	1.3	55.2	1e-05	1	1.8	1	1	1
ENSG00000131165	CHMP1A	charged multivesicular body protein 1A	condensed nuclear chromosome|early endosome|microtubule organizing center|endosome membrane|endomembrane system|nuclear matrix|extracellular vesicular exosome|	cytokinesis|transcription, DNA-templated|proteolysis|mitotic chromosome condensation|protein transport|vesicle-mediated transport|gene silencing|negative regulation of transcription by glucose|negative regulation of transcription, DNA-templated|	protein binding|metallopeptidase activity|zinc ion binding|protein domain specific binding|protein homodimerization activity|	9	-2.5	19.7	9	-3	35.7	-3	55	1e-05	-4	-1.6	1	1	1
ENSG00000132463	GRSF1	G-rich RNA sequence binding factor 1	cytoplasm|mitochondrion|mitochondrial nucleoid|	mRNA polyadenylation|tRNA processing|anterior/posterior pattern specification|morphogenesis of embryonic epithelium|	nucleotide binding|RNA binding|mRNA binding|poly(A) RNA binding|	10	-2.9	10.2	10	-3	44.7	-2.9	54.5	1e-05	-4.1	-2.1	1	1	1
ENSG00000224877	C17ORF89	chromosome 17 open reading frame 89	mitochondrion|	None	None	10	-2.9	12.4	10	-2.1	41.3	-2.1	53.1	1e-05	-3.2	-1.6	1	1	1
ENSG00000003509	NDUFAF7	NADH dehydrogenase (ubiquinone) complex I, assembly factor 7	extracellular space|mitochondrion|	methylation|mitochondrial respiratory chain complex I assembly|	methyltransferase activity|enzyme binding|	10	-2.8	20.3	10	-2.3	33.1	-2.4	52.3	1e-05	-3.4	-1.8	1	1	1
ENSG00000174840	PDE12	phosphodiesterase 12	mitochondrial matrix|	mRNA processing|RNA phosphodiester bond hydrolysis, exonucleolytic|	poly(A)-specific ribonuclease activity|metal ion binding|	10	-2.1	11.9	10	-3.2	43	-3	52.2	1e-05	-4	-1.7	1	1	1
ENSG00000101019	UQCC1	ubiquinol-cytochrome c reductase complex assembly factor 1	mitochondrion|cytoplasmic membrane-bounded vesicle|	None	None	10	-2.6	26.4	10	-1.8	27.2	-2.1	51.2	1e-05	-3.1	-1.6	1	1	1
ENSG00000101247	NDUFAF5	NADH dehydrogenase (ubiquinone) complex I, assembly factor 5	extrinsic component of mitochondrial inner membrane|	methylation|mitochondrial respiratory chain complex I assembly|	molecular_function|methyltransferase activity|	9	-2.3	13.5	9	-2.8	37	-2.7	49.4	1e-05	-3.7	-1.4	1	1	1
ENSG00000146066	HIGD2A	HIG1 hypoxia inducible domain family, member 2A	mitochondrial inner membrane|integral component of membrane|respiratory chain|	negative regulation of apoptotic process|oxidation-reduction process|	None	10	-1.4	11	10	-2.7	40.3	-1.8	49.1	1e-05	-3.2	-1.2	1	1	1
ENSG00000147684	NDUFB9	NADH dehydrogenase (ubiquinone) 1 beta subcomplex, 9, 22kDa	mitochondrial inner membrane|mitochondrial respiratory chain complex I|mitochondrial respiratory chain complex I|extracellular vesicular exosome|	mitochondrial electron transport, NADH to ubiquinone|sensory perception of sound|respiratory electron transport chain|cellular metabolic process|small molecule metabolic process|	NADH dehydrogenase (ubiquinone) activity|	10	-2	16.9	10	-1.3	33.3	-1.5	48.1	1e-05	-2.3	-1.1	1	1	1
ENSG00000116353	MECR	mitochondrial trans-2-enoyl-CoA reductase	mitochondrion|	fatty acid metabolic process|fatty acid biosynthetic process|oxidation-reduction process|	zinc ion binding|trans-2-enoyl-CoA reductase (NADPH) activity|	10	-1	4.48	10	-2.7	46.9	-2.5	47.1	1e-05	-3.6	-1.2	1	1	1
ENSG00000071127	WDR1	WD repeat domain 1	podosome|extracellular region|cytoplasm|cytosol|cell junction|cell projection|extracellular vesicular exosome|	platelet degranulation|blood coagulation|sensory perception of sound|platelet activation|	actin binding|	10	-2.3	5.58	10	-1.9	40.1	-2	44.8	3e-05	-2.9	-1.5	1	1	0
ENSG00000163626	COX18	COX18 cytochrome C oxidase assembly factor	integral component of mitochondrial inner membrane|	respiratory chain complex IV assembly|protein transport|protein insertion into mitochondrial membrane|	protein transporter activity|	10	-1.3	7.92	10	-1.4	37.1	-1.4	44.5	3e-05	-1.9	-1.1	1	1	0
ENSG00000168421	RHOH	ras homolog family member H	immunological synapse|cytoplasm|cytosol|plasma membrane|	regulation of transcription, DNA-templated|small GTPase mediated signal transduction|T cell differentiation|negative regulation of phosphorylation|negative regulation of catalytic activity|negative regulation of I-kappaB kinase/NF-kappaB signaling|mast cell activation|regulation of small GTPase mediated signal transduction|	GTPase inhibitor activity|protein binding|GTP binding|Rho GTPase binding|kinase inhibitor activity|	10	0.6	2.06	10	1.3	43.4	1.3	44.3	3e-05	1	2	1	1	0
ENSG00000189403	HMGB1	high mobility group box 1	condensed chromosome|extracellular region|extracellular space|nucleus|nucleoplasm|cell surface|transcriptional repressor complex|	negative regulation of transcription from RNA polymerase II promoter|myeloid dendritic cell activation|dendritic cell chemotaxis|inflammatory response to antigenic stimulus|DNA topological change|base-excision repair, DNA ligation|apoptotic DNA fragmentation|DNA recombination|regulation of transcription from RNA polymerase II promoter|apoptotic process|cellular component disassembly involved in e…	damaged DNA binding|double-stranded DNA binding|single-stranded DNA binding|sequence-specific DNA binding transcription factor activity|cytokine activity|protein binding|transcription factor binding|DNA binding, bending|DNA binding, bending|chemoattractant activity|poly(A) RNA binding|RAGE receptor binding|repressing transcription factor binding|	10	2.6	10	10	1.4	35.7	1.8	44	3e-05	1.2	3	1	1	0
ENSG00000100075	SLC25A1	solute carrier family 25 (mitochondrial carrier; citrate transporter), member 1	nucleus|mitochondrial inner membrane|integral component of membrane|extracellular vesicular exosome|	carbohydrate metabolic process|glucose metabolic process|gluconeogenesis|citrate transport|triglyceride biosynthetic process|long-chain fatty-acyl-CoA biosynthetic process|cellular lipid metabolic process|small molecule metabolic process|transmembrane transport|	citrate transmembrane transporter activity|	10	1.5	10.9	10	1.3	33.4	1.3	43.7	4e-05	0.9	2	1	1	0
ENSG00000145494	NDUFS6	NADH dehydrogenase (ubiquinone) Fe-S protein 6, 13kDa (NADH-coenzyme Q reductase)	mitochondrial inner membrane|mitochondrial respiratory chain complex I|mitochondrial respiratory chain complex I|	mitochondrial electron transport, NADH to ubiquinone|fatty acid metabolic process|muscle contraction|multicellular organismal aging|respiratory electron transport chain|multicellular organism growth|cellular metabolic process|small molecule metabolic process|reproductive system development|mitochondrion morphogenesis|cardiovascular system development|	NADH dehydrogenase (ubiquinone) activity|electron carrier activity|	10	-1.2	4.3	10	-3.3	42.5	-1.3	43.3	4e-05	-4.1	-1.1	1	1	0
ENSG00000150907	FOXO1	forkhead box O1	nucleus|nucleoplasm|cytoplasm|mitochondrion|cytosol|cytosol|	negative regulation of transcription from RNA polymerase II promoter|blood vessel development|temperature homeostasis|cellular glucose homeostasis|transcription, DNA-templated|protein acetylation|apoptotic process|cellular response to DNA damage stimulus|epidermal growth factor receptor signaling pathway|insulin receptor signaling pathway|fibroblast growth factor receptor signaling pathway|cellul…	RNA polymerase II core promoter proximal region sequence-specific DNA binding transcription factor activity involved in negative regulation of transcription|chromatin binding|protein binding|ubiquitin protein ligase binding|sequence-specific DNA binding|protein phosphatase 2A binding|	10	-1.2	7.49	10	-2.4	37.8	-1.5	43.2	4e-05	-2.8	-1.1	1	1	0
ENSG00000137038	TMEM261	transmembrane protein 261	integral component of membrane|	None	None	10	-1.9	14.3	9	-2	29.1	-2	42.9	4e-05	-2.8	-1.5	1	1	0
ENSG00000164104	HMGB2	high mobility group box 2	condensed chromosome|extracellular space|nucleus|nucleoplasm|cytoplasm|protein complex|perinuclear region of cytoplasm|	positive regulation of endothelial cell proliferation|DNA topological change|base-excision repair, DNA ligation|apoptotic DNA fragmentation|chromatin organization|nucleosome assembly|regulation of transcription from RNA polymerase II promoter|apoptotic process|cellular component disassembly involved in execution phase of apoptosis|spermatid nucleus differentiation|male gonad development|positive …	DNA binding|damaged DNA binding|double-stranded DNA binding|single-stranded DNA binding|sequence-specific DNA binding transcription factor activity|protein binding|DNA binding, bending|protein domain specific binding|chemoattractant activity|transcription regulatory region DNA binding|poly(A) RNA binding|RAGE receptor binding|	10	4.3	27.6	10	0.8	19.8	1.2	42.2	4e-05	0.8	2	1	1	0
ENSG00000062485	CS	citrate synthase	nucleus|mitochondrion|mitochondrial matrix|mitochondrial matrix|extracellular vesicular exosome|	carbohydrate metabolic process|tricarboxylic acid cycle|tricarboxylic acid cycle|cellular metabolic process|cellular carbohydrate metabolic process|small molecule metabolic process|	citrate (Si)-synthase activity|citrate (Si)-synthase activity|poly(A) RNA binding|	10	-1.9	18.9	10	-2	23.6	-1.9	42.1	4e-05	-2.6	-1.4	1	1	0
ENSG00000028277	POU2F2	POU class 2 homeobox 2	nucleus|cytoplasm|	mature B cell differentiation|immunoglobulin secretion involved in immune response|transcription from RNA polymerase II promoter|humoral immune response|positive regulation of transcription, DNA-templated|cell maturation|	sequence-specific DNA binding transcription factor activity|protein domain specific binding|sequence-specific DNA binding|	9	-3.6	30.6	9	-1.7	15.5	-2.5	41.9	4e-05	-4.6	-1.4	1	1	0
ENSG00000137845	ADAM10	ADAM metallopeptidase domain 10	nucleus|cytoplasm|Golgi apparatus|Golgi-associated vesicle|plasma membrane|cell surface|postsynaptic density|membrane|integral component of membrane|extracellular vesicular exosome|perinuclear endoplasmic reticulum|tetraspanin-enriched microdomain|	in utero embryonic development|protein phosphorylation|membrane protein ectodomain proteolysis|membrane protein ectodomain proteolysis|negative regulation of cell adhesion|negative regulation of cell adhesion|epidermal growth factor receptor signaling pathway|Notch signaling pathway|Notch signaling pathway|Notch receptor processing|integrin-mediated signaling pathway|cell-cell signaling|cell deat…	endopeptidase activity|metalloendopeptidase activity|metalloendopeptidase activity|receptor binding|integrin binding|protein binding|metallopeptidase activity|metallopeptidase activity|metallopeptidase activity|zinc ion binding|SH3 domain binding|protein kinase binding|protein homodimerization activity|	10	-1.1	8.08	10	-2.3	37.2	-1.8	41.7	4e-05	-2.9	-1.2	1	1	0
ENSG00000165264	NDUFB6	NADH dehydrogenase (ubiquinone) 1 beta subcomplex, 6, 17kDa	mitochondrial inner membrane|mitochondrial respiratory chain complex I|mitochondrial respiratory chain complex I|integral component of membrane|mitochondrial membrane|	mitochondrial electron transport, NADH to ubiquinone|respiratory electron transport chain|cellular metabolic process|small molecule metabolic process|	NADH dehydrogenase (ubiquinone) activity|	10	-1.7	7.12	9	-2.7	36.9	-2.5	41.6	4e-05	-3.5	-1.2	1	1	0
ENSG00000122033	MTIF3	mitochondrial translational initiation factor 3	mitochondrion|	formation of translation initiation complex|regulation of translational initiation|ribosome disassembly|	translation initiation factor activity|translation factor activity, nucleic acid binding|ribosomal small subunit binding|	10	-1.6	9.3	10	-1.9	32	-1.7	40.5	4e-05	-2.5	-1.2	1	1	0
ENSG00000135297	MTO1	mitochondrial tRNA translation optimization 1	mitochondrion|	oxidation-reduction process|mitochondrial tRNA wobble uridine modification|	poly(A) RNA binding|flavin adenine dinucleotide binding|	10	-2.3	14.1	10	-1.8	27.1	-2	40.2	4e-05	-2.7	-1.1	1	1	0
ENSG00000127481	UBR4	ubiquitin protein ligase E3 component n-recognin 4	nucleus|cytoplasm|centrosome|membrane|integral component of membrane|	viral process|protein ubiquitination involved in ubiquitin-dependent protein catabolic process|	ubiquitin-protein transferase activity|protein binding|calmodulin binding|zinc ion binding|ligase activity|	10	-1.1	9.02	10	-2.3	35.4	-2.1	39.9	4e-05	-2.9	-1	1	1	0
ENSG00000065518	NDUFB4	NADH dehydrogenase (ubiquinone) 1 beta subcomplex, 4, 15kDa	nucleus|mitochondrion|mitochondrial inner membrane|mitochondrial respiratory chain complex I|mitochondrial respiratory chain complex I|integral component of membrane|nuclear membrane|extracellular vesicular exosome|	mitochondrial electron transport, NADH to ubiquinone|response to oxidative stress|respiratory electron transport chain|cellular metabolic process|small molecule metabolic process|	NADH dehydrogenase (ubiquinone) activity|	10	-3	14.8	10	-1.4	29.3	-1.7	38.8	4e-05	-3.2	-1.2	1	1	0
ENSG00000175536	LIPT2	lipoyl(octanoyl) transferase 2 (putative)	mitochondrion|	cellular protein modification process|lipoate biosynthetic process|	octanoyltransferase activity|ligase activity|lipoyl(octanoyl) transferase activity|	10	-2	12.1	10	-2.5	26.9	-2.2	38	4e-05	-3.1	-1.4	1	1	0
ENSG00000180448	HMHA1	histocompatibility (minor) HA-1	cytosol|membrane|	small GTPase mediated signal transduction|positive regulation of GTPase activity|regulation of small GTPase mediated signal transduction|	GTPase activator activity|metal ion binding|	10	-1.6	10.1	10	-1.4	27.4	-1.4	37	5e-05	-2	-0.9	1	1	0
ENSG00000182362	YBEY	ybeY metallopeptidase (putative)	nucleus|mitochondrion|	rRNA processing|proteolysis|	metalloendopeptidase activity|metal ion binding|	10	-1.7	19.9	9	-1.6	17.2	-1.6	36.7	5e-05	-2.5	-1.1	1	1	0
ENSG00000148218	ALAD	aminolevulinate dehydratase	nucleus|cytosol|extracellular vesicular exosome|	porphyrin-containing compound metabolic process|protoporphyrinogen IX biosynthetic process|heme biosynthetic process|heme biosynthetic process|small molecule metabolic process|protein homooligomerization|cellular response to interleukin-4|	catalytic activity|porphobilinogen synthase activity|porphobilinogen synthase activity|zinc ion binding|lead ion binding|identical protein binding|	10	-1.2	12.7	10	-2.9	27.5	-1.3	36	5e-05	-3.4	-0.8	1	1	0
ENSG00000132661	NXT1	nuclear transport factor 2-like export factor 1	nuclear pore|cytoplasm|nuclear speck|	RNA export from nucleus|protein export from nucleus|	protein binding|Ran GTPase binding|	10	-1.2	7.64	10	-1.9	30.2	-1.8	35.8	5e-05	-2.5	-1.1	1	1	0
ENSG00000167770	OTUB1	OTU deubiquitinase, ubiquitin aldehyde binding 1	cytoplasm|extracellular vesicular exosome|	immune system process|DNA repair|proteolysis|cellular response to DNA damage stimulus|protein K48-linked deubiquitination|negative regulation of histone H2A K63-linked ubiquitination|negative regulation of double-strand break repair|	ubiquitin-specific protease activity|protein binding|omega peptidase activity|NEDD8-specific protease activity|ubiquitin protein ligase binding|ubiquitin binding|	10	-1.5	8.06	10	-1.7	27.6	-1.7	35.2	5e-05	-2.6	-1.2	1	1	0
ENSG00000167792	NDUFV1	NADH dehydrogenase (ubiquinone) flavoprotein 1, 51kDa	mitochondrial inner membrane|mitochondrial inner membrane|mitochondrial respiratory chain complex I|mitochondrial respiratory chain complex I|mitochondrial respiratory chain complex I|	mitochondrial electron transport, NADH to ubiquinone|mitochondrial electron transport, NADH to ubiquinone|respiratory electron transport chain|cellular metabolic process|small molecule metabolic process|	NADH dehydrogenase (ubiquinone) activity|FMN binding|metal ion binding|NAD binding|4 iron, 4 sulfur cluster binding|	10	-2	20	10	-1.6	16.1	-1.8	35.1	5e-05	-2.6	-1.3	1	1	0
ENSG00000130299	GTPBP3	GTP binding protein 3 (mitochondrial)	nucleus|mitochondrion|	GTP catabolic process|tRNA modification|	GTPase activity|GTP binding|	10	-2.2	14.6	9	-2.2	20.6	-2.2	34.8	5e-05	-3.1	-1.4	1	1	0
ENSG00000151413	NUBPL	nucleotide binding protein-like	mitochondrion|	mitochondrial respiratory chain complex I assembly|mitochondrion morphogenesis|	ATP binding|metal ion binding|4 iron, 4 sulfur cluster binding|	10	-1.8	17.2	9	-0.9	21.5	-1.4	34.1	5e-05	-2.1	-0.8	1	1	0
ENSG00000158864	NDUFS2	NADH dehydrogenase (ubiquinone) Fe-S protein 2, 49kDa (NADH-coenzyme Q reductase)	nucleus|mitochondrion|mitochondrion|mitochondrial inner membrane|mitochondrial respiratory chain complex I|mitochondrial respiratory chain complex I|mitochondrial respiratory chain complex I|	mitochondrial electron transport, NADH to ubiquinone|response to oxidative stress|respiratory electron transport chain|cellular metabolic process|small molecule metabolic process|	NADH dehydrogenase activity|protein binding|NADH dehydrogenase (ubiquinone) activity|electron carrier activity|metal ion binding|quinone binding|NAD binding|4 iron, 4 sulfur cluster binding|	9	-2.3	9.68	9	-1.5	25.4	-1.7	34	5e-05	-2.8	-1.2	1	1	0
ENSG00000147123	NDUFB11	NADH dehydrogenase (ubiquinone) 1 beta subcomplex, 11, 17.3kDa	mitochondrial inner membrane|mitochondrial respiratory chain complex I|integral component of membrane|	respiratory electron transport chain|cellular metabolic process|small molecule metabolic process|	None	10	-2.3	5.2	9	-1.5	29.1	-1.5	33.6	5e-05	-2.6	-1.1	1	1	0
ENSG00000198728	LDB1	LIM domain binding 1	nuclear chromatin|nucleus|transcription factor complex|protein complex|	transcription-dependent tethering of RNA polymerase II gene DNA at nuclear periphery|gastrulation with mouth forming second|hair follicle development|transcription, DNA-templated|regulation of transcription, DNA-templated|transcription from RNA polymerase II promoter|multicellular organismal development|anterior/posterior axis specification|epithelial structure maintenance|Wnt signaling pathway|c…	RNA polymerase II activating transcription factor binding|enhancer sequence-specific DNA binding|chromatin binding|transcription corepressor activity|enzyme binding|LIM domain binding|LIM domain binding|protein homodimerization activity|protein self-association|	10	1.1	6.23	10	1.3	27.8	1.3	33.4	5e-05	0.9	2	1	1	0
ENSG00000179134	SAMD4B	sterile alpha motif domain containing 4B	nucleus|cytoplasm|	transcription, DNA-templated|regulation of transcription, DNA-templated|	poly(A) RNA binding|	10	-2	14.2	10	-1.3	20	-1.4	32.8	7e-05	-2.3	-1	1	1	0
ENSG00000228594	C1ORF233	chromosome 1 open reading frame 233	integral component of membrane|	None	None	8	3.2	10.3	8	2.6	22.8	2.8	32.5	7e-05	2.1	5.4	1	1	0
ENSG00000178951	ZBTB7A	zinc finger and BTB domain containing 7A	nucleus|	negative regulation of transcription from RNA polymerase II promoter|transcription, DNA-templated|multicellular organismal development|cell differentiation|negative regulation of transcription, DNA-templated|	DNA binding|histone acetyltransferase binding|metal ion binding|	8	-1.4	8.88	8	-1.9	24.1	-1.6	31.9	8e-05	-2.5	-1.1	1	1	0
ENSG00000113845	TIMMDC1	translocase of inner mitochondrial membrane domain containing 1	nucleus|mitochondrion|integral component of membrane|mitochondrial membrane|	None	None	9	-0.8	2.91	8	-1.6	30.9	-1.4	31.6	8e-05	-2.3	-0.9	1	1	0
ENSG00000101109	STK4	serine/threonine kinase 4	nucleus|cytoplasm|cytosol|	cell morphogenesis|patterning of blood vessels|neural tube formation|endocardium development|protein phosphorylation|apoptotic process|signal transduction|central nervous system development|negative regulation of cell proliferation|peptidyl-serine phosphorylation|signal transduction by phosphorylation|keratinocyte differentiation|hippo signaling|hippo signaling|intracellular signal transduction|p…	magnesium ion binding|protein serine/threonine kinase activity|protein serine/threonine kinase activity|protein binding|ATP binding|transcription factor binding|identical protein binding|protein homodimerization activity|protein serine/threonine kinase activator activity|protein dimerization activity|	9	2.2	14.9	10	1	22.2	1.2	31.4	9e-05	0.8	2.5	1	1	0
ENSG00000256100	AP000721.4	N/A	None	None	None	10	-1.3	4.07	10	-1.6	27.5	-1.6	30.9	0.0001	-2.2	-1	1	1	0
ENSG00000084090	STARD7	StAR-related lipid transfer (START) domain containing 7	mitochondrion|	None	lipid binding|	10	-1.8	7.95	10	-1.2	24.3	-1.3	30.9	0.0001	-2.1	-0.9	1	1	0
ENSG00000162599	NFIA	nuclear factor I/A	nucleus|nucleus|	DNA replication|transcription, DNA-templated|regulation of transcription, DNA-templated|response to organic cyclic compound|viral genome replication|positive regulation of transcription from RNA polymerase II promoter|	RNA polymerase II core promoter proximal region sequence-specific DNA binding|RNA polymerase II core promoter proximal region sequence-specific DNA binding transcription factor activity involved in positive regulation of transcription|sequence-specific DNA binding transcription factor activity|transcription factor binding|	10	-1.1	4.37	10	-1.3	26.7	-1.3	30.6	0.00011	-2	-0.9	1	1	0
ENSG00000078140	UBE2K	ubiquitin-conjugating enzyme E2K	cytoplasm|extracellular vesicular exosome|	ubiquitin-dependent protein catabolic process|regulation of proteasomal ubiquitin-dependent protein catabolic process|intrinsic apoptotic signaling pathway in response to endoplasmic reticulum stress|protein K48-linked ubiquitination|	ubiquitin-protein transferase activity|protein binding|ATP binding|acid-amino acid ligase activity|ubiquitin protein ligase binding|ubiquitin-ubiquitin ligase activity|	10	-1.8	14.5	10	-1.4	16.7	-1.6	30.4	0.00012	-2.3	-1	1	1	0
ENSG00000155975	VPS37A	vacuolar protein sorting 37 homolog A (S. cerevisiae)	ESCRT I complex|nucleus|cytoplasm|centrosome|endosome membrane|late endosome membrane|intracellular membrane-bounded organelle|	cell death|protein transport|viral process|endosomal transport|viral life cycle|virion assembly|viral protein processing|ubiquitin-dependent protein catabolic process via the multivesicular body sorting pathway|ubiquitin-dependent protein catabolic process via the multivesicular body sorting pathway|membrane organization|intracellular transport of virus|	None	10	-2.2	16.8	9	-2.6	14.5	-2.5	30.3	0.00012	-3.7	-1.6	1	1	0
ENSG00000139180	NDUFA9	NADH dehydrogenase (ubiquinone) 1 alpha subcomplex, 9, 39kDa	nucleus|mitochondrial inner membrane|mitochondrial respiratory chain complex I|mitochondrial matrix|mitochondrial membrane|	mitochondrial electron transport, NADH to ubiquinone|sodium ion transport|respiratory electron transport chain|cellular metabolic process|small molecule metabolic process|	NADH dehydrogenase activity|NADH dehydrogenase activity|protein binding|NADH dehydrogenase (ubiquinone) activity|protein complex binding|coenzyme binding|	10	-2.1	24.9	10	-1.3	7.8	-1.9	30.2	0.00012	-2.9	-1.2	1	1	0
ENSG00000119421	NDUFA8	NADH dehydrogenase (ubiquinone) 1 alpha subcomplex, 8, 19kDa	mitochondrion|mitochondrial inner membrane|mitochondrial respiratory chain complex I|mitochondrial respiratory chain complex I|mitochondrial intermembrane space|	mitochondrial electron transport, NADH to ubiquinone|respiratory electron transport chain|cellular metabolic process|small molecule metabolic process|	NADH dehydrogenase (ubiquinone) activity|protein complex binding|	10	-2.5	9.82	10	-1.5	23.1	-1.6	29.8	0.00012	-3	-1.2	1	1	0
ENSG00000066322	ELOVL1	ELOVL fatty acid elongase 1	endoplasmic reticulum|endoplasmic reticulum membrane|membrane|integral component of endoplasmic reticulum membrane|	fatty acid elongation, saturated fatty acid|triglyceride biosynthetic process|sphingolipid biosynthetic process|fatty acid elongation, monounsaturated fatty acid|long-chain fatty-acyl-CoA biosynthetic process|very long-chain fatty acid biosynthetic process|cellular lipid metabolic process|small molecule metabolic process|	protein binding|fatty acid elongase activity|	9	2.4	12.7	10	1	21.5	1.4	29.8	0.00012	0.8	2.7	1	1	0
ENSG00000135940	COX5B	cytochrome c oxidase subunit Vb	mitochondrion|mitochondrial inner membrane|extracellular vesicular exosome|	respiratory gaseous exchange|respiratory electron transport chain|cellular metabolic process|small molecule metabolic process|hydrogen ion transmembrane transport|hydrogen ion transmembrane transport|	cytochrome-c oxidase activity|metal ion binding|	8	-3.3	17.7	7	-2.3	13.8	-2.4	29.8	0.00012	-4.6	-1.6	1	1	0
ENSG00000081237	PTPRC	protein tyrosine phosphatase, receptor type, C	plasma membrane|integral component of plasma membrane|focal adhesion|external side of plasma membrane|membrane|membrane raft|extracellular vesicular exosome|	negative regulation of T cell mediated cytotoxicity|negative regulation of cytokine-mediated signaling pathway|hematopoietic progenitor cell differentiation|immunoglobulin biosynthetic process|negative regulation of protein kinase activity|negative regulation of protein kinase activity|protein dephosphorylation|negative regulation of cell adhesion involved in substrate-bound cell migration|cell s…	protein tyrosine phosphatase activity|transmembrane receptor protein tyrosine phosphatase activity|protein binding|protein kinase binding|	10	-1.4	3.33	10	-1.2	26.5	-1.3	29.2	0.00014	-2.1	-0.9	1	1	0
ENSG00000178057	NDUFAF3	NADH dehydrogenase (ubiquinone) complex I, assembly factor 3	nucleus|mitochondrial inner membrane|	mitochondrial respiratory chain complex I assembly|	protein binding|	9	-2.1	11	9	-1.7	18.7	-1.8	29.1	0.00014	-2.8	-1.2	1	1	0
ENSG00000075624	ACTB	actin, beta	nuclear chromatin|extracellular space|nucleoplasm|cytoplasm|cytosol|cytoskeleton|postsynaptic density|membrane|axon|ribonucleoprotein complex|cortical cytoskeleton|NuA4 histone acetyltransferase complex|cytoplasmic ribonucleoprotein granule|protein complex|extracellular vesicular exosome|MLL5-L complex|blood microparticle|	retina homeostasis|chromatin organization|protein folding|cellular component movement|axon guidance|blood coagulation|substantia nigra development|cell junction assembly|adherens junction organization|Fc-gamma receptor signaling pathway involved in phagocytosis|ATP-dependent chromatin remodeling|cellular protein metabolic process|innate immune response|cell-cell junction organization|'de novo' po…	RNA polymerase II core promoter proximal region sequence-specific DNA binding|RNA polymerase II distal enhancer sequence-specific DNA binding|structural constituent of cytoskeleton|protein binding|ATP binding|kinesin binding|protein kinase binding|Tat protein binding|nucleosomal DNA binding|nitric-oxide synthase binding|	9	-1.6	17.3	9	-1.1	13.7	-1.2	29.1	0.00014	-2.1	-0.8	1	1	0
ENSG00000256269	HMBS	hydroxymethylbilane synthase	cytosol|	porphyrin-containing compound metabolic process|protoporphyrinogen IX biosynthetic process|heme biosynthetic process|heme biosynthetic process|peptidyl-pyrromethane cofactor linkage|small molecule metabolic process|	hydroxymethylbilane synthase activity|hydroxymethylbilane synthase activity|	10	-1.8	5.24	10	-1.7	24.1	-1.7	28.9	0.00014	-2.6	-1.2	1	1	0
ENSG00000109390	NDUFC1	NADH dehydrogenase (ubiquinone) 1, subcomplex unknown, 1, 6kDa	mitochondrion|mitochondrial inner membrane|mitochondrial respiratory chain complex I|integral component of membrane|	mitochondrial electron transport, NADH to ubiquinone|respiratory electron transport chain|cellular metabolic process|small molecule metabolic process|	NADH dehydrogenase (ubiquinone) activity|	10	-1.1	4.17	10	-1.2	25.2	-1.2	28.9	0.00014	-1.9	-0.8	1	1	0
ENSG00000049618	ARID1B	AT rich interactive domain 1B (SWI1-like)	nucleus|cytoplasm|SWI/SNF complex|	transcription, DNA-templated|nervous system development|chromatin-mediated maintenance of transcription|	DNA binding|transcription coactivator activity|protein binding|	10	1.7	5.38	10	1.2	24.1	1.3	28.8	0.00014	0.8	2.1	1	1	0
ENSG00000066336	SPI1	Spi-1 proto-oncogene	nuclear chromatin|	negative regulation of transcription from RNA polymerase II promoter|lymphoid progenitor cell differentiation|regulation of transcription from RNA polymerase II promoter|transcription from RNA polymerase II promoter|transcription from RNA polymerase II promoter|transcription from RNA polymerase II promoter|lymphocyte differentiation|erythrocyte differentiation|macrophage differentiation|granulocy…	RNA polymerase II distal enhancer sequence-specific DNA binding|sequence-specific DNA binding RNA polymerase II transcription factor activity|core promoter binding|RNA polymerase II transcription factor binding|RNA polymerase II distal enhancer sequence-specific DNA binding transcription factor activity involved in positive regulation of transcription|sequence-specific DNA binding transcription f…	9	1.9	18.9	9	1	11.5	1.6	28.2	0.00016	1	2.5	1	1	0
ENSG00000095209	TMEM38B	transmembrane protein 38B	nucleus|integral component of membrane|nuclear membrane|sarcoplasmic reticulum membrane|	potassium ion transmembrane transport|	potassium channel activity|	10	-0.6	0.364	10	-3.2	30.3	-3.2	28.2	0.00016	-5.2	-1	1	1	0
ENSG00000115286	NDUFS7	NADH dehydrogenase (ubiquinone) Fe-S protein 7, 20kDa (NADH-coenzyme Q reductase)	mitochondrial inner membrane|mitochondrial respiratory chain complex I|mitochondrial respiratory chain complex I|mitochondrial respiratory chain complex I|neuron projection|neuronal cell body|synaptic membrane|	mitochondrial electron transport, NADH to ubiquinone|respiratory electron transport chain|mitochondrial respiratory chain complex I assembly|cellular metabolic process|small molecule metabolic process|	protease binding|NADH dehydrogenase activity|protein binding|NADH dehydrogenase (ubiquinone) activity|oxidoreductase activity, acting on NAD(P)H, quinone or similar compound as acceptor|metal ion binding|quinone binding|4 iron, 4 sulfur cluster binding|	10	-1.1	6.26	10	-1.9	24.1	-1.8	27.8	0.0002	-2.5	-0.9	1	1	0
ENSG00000163932	PRKCD	protein kinase C, delta	nucleus|nucleoplasm|cytoplasm|mitochondrion|endoplasmic reticulum|cytosol|cytosol|plasma membrane|plasma membrane|cell-cell junction|nuclear matrix|perinuclear region of cytoplasm|extracellular vesicular exosome|	protein phosphorylation|apoptotic process|apoptotic process|cellular component disassembly involved in execution phase of apoptosis|cell cycle|signal transduction|epidermal growth factor receptor signaling pathway|activation of phospholipase C activity|blood coagulation|fibroblast growth factor receptor signaling pathway|gene expression|regulation of receptor activity|immunoglobulin mediated immu…	protein serine/threonine kinase activity|protein kinase C activity|calcium-independent protein kinase C activity|non-membrane spanning protein tyrosine kinase activity|protein binding|ATP binding|enzyme activator activity|enzyme binding|enzyme binding|insulin receptor substrate binding|metal ion binding|	10	-0.9	2.88	10	-1.2	25.3	-1.2	27.5	0.00021	-1.8	-0.8	1	1	0
ENSG00000103266	STUB1	STIP1 homology and U-box containing protein 1, E3 ubiquitin protein ligase	ubiquitin ligase complex|nucleus|cytoplasm|cytosol|plasma membrane|ubiquitin conjugating enzyme complex|nuclear inclusion body|intermediate filament cytoskeleton|extracellular vesicular exosome|	protein polyubiquitination|protein polyubiquitination|DNA repair|ubiquitin-dependent protein catabolic process|misfolded or incompletely synthesized protein catabolic process|transforming growth factor beta receptor signaling pathway|negative regulation of transforming growth factor beta receptor signaling pathway|ubiquitin-dependent SMAD protein catabolic process|positive regulation of protein u…	ubiquitin-protein transferase activity|ubiquitin-protein transferase activity|ubiquitin-protein transferase activity|protein binding|ligase activity|enzyme binding|kinase binding|Hsp70 protein binding|protein binding, bridging|TPR domain binding|ubiquitin protein ligase binding|ubiquitin-ubiquitin ligase activity|protein homodimerization activity|SMAD binding|misfolded protein binding|Hsp90 prote…	10	-1.5	8.52	10	-1.7	19.3	-1.6	27.3	0.00023	-2.5	-1	1	0	0
ENSG00000182162	P2RY8	purinergic receptor P2Y, G-protein coupled, 8	plasma membrane|integral component of membrane|	G-protein coupled purinergic nucleotide receptor signaling pathway|	G-protein coupled purinergic nucleotide receptor activity|	10	0.7	2.64	10	0.9	25	0.9	27.2	0.00023	0.6	1.5	1	0	0
ENSG00000023228	NDUFS1	NADH dehydrogenase (ubiquinone) Fe-S protein 1, 75kDa (NADH-coenzyme Q reductase)	mitochondrial inner membrane|mitochondrial respiratory chain complex I|mitochondrial respiratory chain complex I|mitochondrial respiratory chain complex I|mitochondrial intermembrane space|	mitochondrial electron transport, NADH to ubiquinone|apoptotic mitochondrial changes|respiratory electron transport chain|cellular metabolic process|small molecule metabolic process|cellular respiration|ATP metabolic process|regulation of mitochondrial membrane potential|reactive oxygen species metabolic process|	protein binding|NADH dehydrogenase (ubiquinone) activity|NADH dehydrogenase (ubiquinone) activity|electron carrier activity|metal ion binding|2 iron, 2 sulfur cluster binding|4 iron, 4 sulfur cluster binding|	9	-2.2	18.2	10	-1.5	10.8	-1.8	27	0.00025	-2.9	-1.2	1	0	0
ENSG00000102172	SMS	spermine synthase	cytosol|extracellular vesicular exosome|	methionine metabolic process|polyamine metabolic process|spermine biosynthetic process|cellular nitrogen compound metabolic process|small molecule metabolic process|	spermidine synthase activity|spermine synthase activity|	10	-1.5	12	10	-0.9	16.4	-1.1	26.9	0.00025	-1.8	-0.6	1	0	0
ENSG00000143314	MRPL24	mitochondrial ribosomal protein L24	mitochondrion|ribosome|	translation|	structural constituent of ribosome|	10	-1.5	8.75	10	-1.2	18.4	-1.2	26.7	0.00026	-2.2	-0.7	1	0	0
ENSG00000144182	LIPT1	lipoyltransferase 1	mitochondrion|	cellular protein modification process|lipid metabolic process|protein lipoylation|	transferase activity, transferring acyl groups|	10	-2.3	15.2	10	-1	14.4	-1.7	26.5	0.00026	-3	-0.8	1	0	0
ENSG00000142186	SCYL1	SCY1-like 1 (S. cerevisiae)	nucleus|cytoplasm|endoplasmic reticulum-Golgi intermediate compartment|Golgi apparatus|cis-Golgi network|microtubule organizing center|membrane|COPI vesicle coat|	transcription, DNA-templated|regulation of transcription, DNA-templated|retrograde vesicle-mediated transport, Golgi to ER|peptidyl-tyrosine phosphorylation|	DNA binding|protein tyrosine kinase activity|ATP binding|	10	-0.9	1.95	10	-1.1	24.7	-1	26.2	0.00028	-1.6	-0.7	1	0	0
ENSG00000121940	CLCC1	chloride channel CLIC-like 1	nucleus|endoplasmic reticulum|Golgi apparatus|membrane|integral component of membrane|intracellular membrane-bounded organelle|	chloride transmembrane transport|	chloride channel activity|	10	-1.7	8.8	10	-1.2	18.6	-1.3	26.2	0.00028	-2.2	-0.8	1	0	0
ENSG00000076928	ARHGEF1	Rho guanine nucleotide exchange factor (GEF) 1	cytoplasm|cytosol|plasma membrane|plasma membrane|	Rho protein signal transduction|cell proliferation|positive regulation of Rho GTPase activity|positive regulation of Rho GTPase activity|termination of G-protein coupled receptor signaling pathway|neurotrophin TRK receptor signaling pathway|regulation of axonogenesis|negative regulation of axonogenesis|	Rho guanyl-nucleotide exchange factor activity|GTPase activator activity|protein binding|poly(A) RNA binding|	10	2.2	3.88	10	0.9	22.7	0.9	26.1	0.00029	0.6	1.7	1	0	0
ENSG00000108604	SMARCD2	SWI/SNF related, matrix associated, actin dependent regulator of chromatin, subfamily d, member 2	nuclear chromatin|nucleus|SWI/SNF complex|protein complex|	nucleosome disassembly|chromatin remodeling|transcription, DNA-templated|regulation of transcription from RNA polymerase II promoter|ATP-dependent chromatin remodeling|	RNA polymerase II core promoter proximal region sequence-specific DNA binding|RNA polymerase II distal enhancer sequence-specific DNA binding|transcription coactivator activity|protein binding|nucleosomal DNA binding|	10	2	11	10	0.8	18.3	0.9	26.1	0.00029	0.6	2	1	0	0
ENSG00000255154	RPP14	ribonuclease P/MRP 14kDa subunit	nucleus|	tRNA processing|RNA phosphodiester bond hydrolysis, endonucleolytic|	RNA binding|ribonuclease P activity|	10	-1.6	7.47	10	-1.4	19.2	-1.5	26.1	0.00029	-2.4	-1	1	0	0
ENSG00000185721	DRG1	developmentally regulated GTP binding protein 1	cytoplasm|polysome|membrane|	transcription, DNA-templated|multicellular organismal development|	protein binding|GTP binding|transcription factor binding|identical protein binding|	10	2.2	4.32	9	2.5	22.1	2.5	26.1	0.00029	1.7	4.7	1	0	0
ENSG00000114127	XRN1	5'-3' exoribonuclease 1	cytoplasmic mRNA processing body|cytosol|membrane|	nuclear-transcribed mRNA catabolic process, deadenylation-dependent decay|nuclear-transcribed mRNA catabolic process|gene expression|RNA metabolic process|mRNA metabolic process|rRNA catabolic process|exonucleolytic nuclear-transcribed mRNA catabolic process involved in deadenylation-dependent decay|nuclear mRNA surveillance|histone mRNA catabolic process|nucleic acid phosphodiester bond hydrolys…	DNA binding|protein binding|5'-3' exonuclease activity|poly(A) RNA binding|	10	-1.6	7.8	10	-1.6	18.6	-1.6	26	0.00029	-2.7	-1.1	1	0	0
ENSG00000108561	C1QBP	complement component 1, q subcomponent binding protein	extracellular space|nucleus|nucleolus|cytoplasm|mitochondrion|mitochondrial matrix|cytosol|plasma membrane|cell surface|membrane|	negative regulation of transcription from RNA polymerase II promoter|transcription, DNA-templated|mRNA processing|apoptotic process|immune response|complement activation, classical pathway|blood coagulation|blood coagulation, intrinsic pathway|RNA splicing|phosphatidylinositol 3-kinase signaling|viral process|regulation of complement activation|negative regulation of interferon-gamma production|n…	complement component C1q binding|transcription corepressor activity|mRNA binding|protein kinase C binding|protein binding|hyaluronic acid binding|transcription factor binding|kininogen binding|adrenergic receptor binding|mitochondrial ribosome binding|	9	-1.4	10.5	8	-1.3	15.7	-1.3	25.7	0.00031	-2	-0.9	1	0	0
ENSG00000116221	MRPL37	mitochondrial ribosomal protein L37	mitochondrion|mitochondrial ribosome|	translation|	structural constituent of ribosome|poly(A) RNA binding|	10	-1.4	10.5	10	-1.2	15.8	-1.2	25.7	0.00031	-1.9	-0.8	1	0	0
ENSG00000055044	NOP58	NOP58 ribonucleoprotein	nucleus|nucleolus|nucleolus|small nucleolar ribonucleoprotein complex|cytoplasm|Cajal body|membrane|box C/D snoRNP complex|pre-snoRNP complex|	rRNA processing|snRNP protein import into nucleus|cell growth|	protein binding|snoRNA binding|poly(A) RNA binding|	9	3.2	3.6	9	-1.5	26.4	-1.5	25.5	0.00035	-2.3	-0.9	1	0	0
ENSG00000080802	CNOT4	CCR4-NOT transcription complex, subunit 4	nucleus|cytosol|CCR4-NOT complex|	nuclear-transcribed mRNA catabolic process, deadenylation-dependent decay|nuclear-transcribed mRNA poly(A) tail shortening|gene expression|RNA metabolic process|mRNA metabolic process|protein autoubiquitination|	nucleotide binding|ubiquitin-protein transferase activity|protein binding|zinc ion binding|ligase activity|poly(A) RNA binding|	10	1.2	8.47	10	0.7	17.7	1.2	25.5	0.00035	0.6	2.3	1	0	0
ENSG00000088682	COQ9	coenzyme Q9	mitochondrion|	mitochondrial electron transport, NADH to ubiquinone|ubiquinone biosynthetic process|	None	10	-2.4	2.78	10	-1.1	24	-1.6	25.4	0.00037	-2.6	-0.7	1	0	0
ENSG00000176407	KCMF1	potassium channel modulatory factor 1	None	metabolic process|	zinc ion binding|ligase activity|	10	-1.8	8.47	10	-1.4	18	-1.4	25.4	0.00037	-2.4	-1	1	0	0
ENSG00000159352	PSMD4	proteasome (prosome, macropain) 26S subunit, non-ATPase, 4	proteasome complex|nucleus|nucleoplasm|cytoplasm|cytosol|proteasome regulatory particle, base subcomplex|proteasome accessory complex|	G1/S transition of mitotic cell cycle|protein polyubiquitination|mitotic cell cycle|antigen processing and presentation of peptide antigen via MHC class I|antigen processing and presentation of exogenous peptide antigen via MHC class I, TAP-dependent|regulation of cellular amino acid metabolic process|apoptotic process|DNA damage response, signal transduction by p53 class mediator resulting in ce…	protein binding|identical protein binding|poly(A) RNA binding|	8	4	21.7	9	1.1	11	1.1	25.3	0.00042	0.7	6.6	1	0	0
ENSG00000154174	TOMM70A	translocase of outer mitochondrial membrane 70 homolog A (S. cerevisiae)	mitochondrion|mitochondrial outer membrane translocase complex|membrane|integral component of membrane|	protein targeting to mitochondrion|cellular protein metabolic process|protein transmembrane transport|	protein binding|protein transmembrane transporter activity|	10	-1.6	8.37	9	-1.5	17.2	-1.5	25.1	0.00047	-2.3	-1	1	0	0
ENSG00000156170	NDUFAF6	NADH dehydrogenase (ubiquinone) complex I, assembly factor 6	nucleus|nucleus|cytoplasm|mitochondrial inner membrane|	biosynthetic process|mitochondrial respiratory chain complex I assembly|	transferase activity|	10	-1.1	3.46	10	-1.2	22	-1.2	25.1	0.00047	-2.1	-0.7	1	0	0
ENSG00000148290	SURF1	surfeit 1	mitochondrial respiratory chain|integral component of membrane|	oxidative phosphorylation|ATP biosynthetic process|respiratory chain complex IV assembly|aerobic respiration|oxidation-reduction process|hydrogen ion transmembrane transport|hydrogen ion transmembrane transport|	cytochrome-c oxidase activity|protein binding|	10	-1.5	8.77	10	-1.8	16.7	-1.7	24.9	0.00049	-2.6	-0.9	1	0	0
ENSG00000168653	NDUFS5	NADH dehydrogenase (ubiquinone) Fe-S protein 5, 15kDa (NADH-coenzyme Q reductase)	mitochondrion|mitochondrial inner membrane|mitochondrial respiratory chain complex I|mitochondrial respiratory chain complex I|mitochondrial intermembrane space|	mitochondrial electron transport, NADH to ubiquinone|respiratory electron transport chain|mitochondrial respiratory chain complex I assembly|cellular metabolic process|small molecule metabolic process|	NADH dehydrogenase (ubiquinone) activity|	9	-1.8	11.7	10	-1	16.4	-1.2	24.9	0.00049	-2.2	-0.7	1	0	0
ENSG00000121897	LIAS	lipoic acid synthetase	mitochondrion|	neural tube closure|inflammatory response|response to oxidative stress|lipoate biosynthetic process|protein lipoylation|response to lipopolysaccharide|	lipoate synthase activity|metal ion binding|4 iron, 4 sulfur cluster binding|	9	-1.2	3.64	10	-1.1	21.6	-1.1	24.9	0.00049	-1.9	-0.7	1	0	0
ENSG00000119801	YPEL5	yippee-like 5 (Drosophila)	None	None	None	9	-0.9	4.59	9	-1.1	20.7	-1	24.8	0.00051	-1.8	-0.7	1	0	0
ENSG00000113916	BCL6	B-cell CLL/lymphoma 6	nucleus|replication fork|	protein import into nucleus, translocation|negative regulation of transcription from RNA polymerase II promoter|cell morphogenesis|negative regulation of cell-matrix adhesion|germinal center formation|regulation of germinal center formation|negative regulation of type 2 immune response|negative regulation of B cell apoptotic process|transcription, DNA-templated|inflammatory response|cellular resp…	chromatin binding|sequence-specific DNA binding transcription factor activity|protein binding|chromatin DNA binding|sequence-specific DNA binding|metal ion binding|	7	1	0.37	6	1.7	24.9	1.6	24.7	0.00052	1.2	2.8	1	0	0
ENSG00000172586	CHCHD1	coiled-coil-helix-coiled-coil-helix domain containing 1	nucleus|nucleolus|cytoplasm|mitochondrion|	None	protein binding|poly(A) RNA binding|	9	-1.5	13.1	8	-1	12.8	-1.2	24.5	0.00055	-1.9	-0.7	1	0	0
ENSG00000171960	PPIH	peptidylprolyl isomerase H (cyclophilin H)	spliceosomal complex|cytoplasm|nuclear speck|U4/U6 x U5 tri-snRNP complex|U4/U6 snRNP|	mRNA splicing, via spliceosome|protein peptidyl-prolyl isomerization|protein peptidyl-prolyl isomerization|protein folding|protein complex assembly|positive regulation of viral genome replication|	peptidyl-prolyl cis-trans isomerase activity|protein binding|cyclosporin A binding|ribonucleoprotein complex binding|	10	-0.4	0.469	10	-3	27.5	-3	24.5	0.00055	-5.1	-0.5	1	0	0
ENSG00000184983	NDUFA6	NADH dehydrogenase (ubiquinone) 1 alpha subcomplex, 6, 14kDa	mitochondrial inner membrane|mitochondrial respiratory chain complex I|mitochondrial respiratory chain complex I|mitochondrial membrane|	mitochondrial electron transport, NADH to ubiquinone|response to oxidative stress|respiratory electron transport chain|cellular metabolic process|small molecule metabolic process|	NADH dehydrogenase (ubiquinone) activity|	10	-2.1	10.5	10	-1.5	15.3	-1.6	24.5	0.00055	-2.6	-1	1	0	0
ENSG00000168282	MGAT2	mannosyl (alpha-1,6-)-glycoprotein beta-1,2-N-acetylglucosaminyltransferase	Golgi membrane|Golgi stack|membrane|integral component of membrane|	protein N-linked glycosylation|oligosaccharide metabolic process|oligosaccharide biosynthetic process|protein N-linked glycosylation via asparagine|post-translational protein modification|cellular protein metabolic process|	alpha-1,6-mannosylglycoprotein 2-beta-N-acetylglucosaminyltransferase activity|carbohydrate binding|	9	0.5	1.62	9	0.9	23.3	0.9	24.4	0.00055	0.5	1.4	1	0	0
ENSG00000043514	TRIT1	tRNA isopentenyltransferase 1	cellular_component|mitochondrion|	tRNA processing|	ATP binding|metal ion binding|tRNA dimethylallyltransferase activity|	10	-1.8	14.7	9	-1.4	10.3	-1.5	24.1	0.00067	-2.4	-1	0	0	0
ENSG00000160087	UBE2J2	ubiquitin-conjugating enzyme E2, J2	endoplasmic reticulum membrane|integral component of membrane|	response to unfolded protein|protein ubiquitination|	ATP binding|acid-amino acid ligase activity|	9	-1.1	3.25	9	-2.5	23.3	-1.4	24	0.00067	-3.2	-0.9	0	0	0
ENSG00000072786	STK10	serine/threonine kinase 10	plasma membrane|extracellular vesicular exosome|	protein phosphorylation|cell cycle|signal transduction by phosphorylation|signal transduction by phosphorylation|protein autophosphorylation|lymphocyte aggregation|regulation of lymphocyte migration|	protein serine/threonine kinase activity|protein binding|ATP binding|polo kinase kinase activity|identical protein binding|protein homodimerization activity|	10	1.5	10.4	10	0.8	15.9	0.9	23.8	0.00071	0.5	1.7	0	0	0
ENSG00000164182	NDUFAF2	NADH dehydrogenase (ubiquinone) complex I, assembly factor 2	mitochondrion|	negative regulation of insulin secretion involved in cellular response to glucose stimulus|	None	10	-0.6	1.81	10	-3.1	25.1	-3	23.8	0.00071	-5.7	-0.6	0	0	0
ENSG00000267740	AC024592.12	N/A	None	None	None	9	-1	5.54	9	-1.2	18.6	-1.2	23.7	0.00074	-2.1	-0.8	0	0	0
ENSG00000160613	PCSK7	proprotein convertase subtilisin/kexin type 7	integral component of Golgi membrane|	proteolysis|protein processing|peptide hormone processing|	serine-type endopeptidase activity|peptidase activity|	10	-1.3	10.6	10	-0.8	14.3	-1.6	23.7	0.00074	-2.2	-0.6	0	0	0
ENSG00000100883	SRP54	signal recognition particle 54kDa	nucleus|nucleolus|cytoplasm|signal recognition particle, endoplasmic reticulum targeting|cytosol|nuclear speck|	GTP catabolic process|GTP catabolic process|translation|SRP-dependent cotranslational protein targeting to membrane|SRP-dependent cotranslational protein targeting to membrane|SRP-dependent cotranslational protein targeting to membrane, translocation|SRP-dependent cotranslational protein targeting to membrane, signal sequence recognition|gene expression|response to drug|cellular protein metabolic…	GTPase activity|GTP binding|drug binding|7S RNA binding|GDP binding|endoplasmic reticulum signal peptide binding|ribonucleoprotein complex binding|poly(A) RNA binding|	10	-1.6	7.41	9	-1.7	16.4	-1.6	23.5	0.00082	-2.3	-0.8	0	0	0
ENSG00000175756	AURKAIP1	aurora kinase A interacting protein 1	nucleus|mitochondrion|intracellular membrane-bounded organelle|	negative regulation of mitosis|positive regulation of proteolysis|	protein binding|	10	-1.5	13.3	10	-0.6	11.3	-1.6	23.5	0.00082	-2.4	-0.7	0	0	0
ENSG00000029363	BCLAF1	BCL2-associated transcription factor 1	nucleus|nucleolus|cytoplasm|	transcription, DNA-templated|apoptotic process|positive regulation of apoptotic process|regulation of DNA-templated transcription in response to stress|negative regulation of transcription, DNA-templated|negative regulation of transcription, DNA-templated|positive regulation of DNA-templated transcription, initiation|positive regulation of response to DNA damage stimulus|positive regulation of in…	DNA binding|protein binding|poly(A) RNA binding|	10	-0.9	2.94	10	-1.2	21.1	-1.2	23.4	0.00084	-1.9	-0.8	0	0	0
ENSG00000180879	SSR4	signal sequence receptor, delta	Sec61 translocon complex|integral component of membrane|extracellular vesicular exosome|	translation|SRP-dependent cotranslational protein targeting to membrane|gene expression|cellular protein metabolic process|	None	9	-0.9	2.86	9	-1	20.9	-1	23.4	0.00084	-1.7	-0.6	0	0	0
ENSG00000221823	PPP3R1	protein phosphatase 3, regulatory subunit B, alpha	nucleoplasm|cytosol|calcineurin complex|sarcolemma|	apoptotic process|dephosphorylation|Fc-epsilon receptor signaling pathway|innate immune response|intrinsic apoptotic signaling pathway|positive regulation of protein insertion into mitochondrial membrane involved in apoptotic signaling pathway|	calcium-dependent protein serine/threonine phosphatase activity|calcium ion binding|protein binding|calmodulin binding|protein domain specific binding|	10	2.2	10.5	10	1.3	16	1.6	23.2	0.0009	0.9	2.8	0	0	0
ENSG00000140990	NDUFB10	NADH dehydrogenase (ubiquinone) 1 beta subcomplex, 10, 22kDa	mitochondrial inner membrane|mitochondrial respiratory chain complex I|mitochondrial respiratory chain complex I|extracellular vesicular exosome|	mitochondrial electron transport, NADH to ubiquinone|respiratory electron transport chain|cellular metabolic process|small molecule metabolic process|	protein binding|NADH dehydrogenase (ubiquinone) activity|	8	-1	2.93	9	-1.6	21	-1.1	23.2	0.0009	-2.2	-0.7	0	0	0
ENSG00000101266	CSNK2A1	casein kinase 2, alpha 1 polypeptide	nucleus|cytosol|plasma membrane|Sin3 complex|NuRD complex|PcG protein complex|	mitotic cell cycle|transcription, DNA-templated|regulation of transcription, DNA-templated|protein phosphorylation|signal transduction|axon guidance|positive regulation of cell proliferation|Wnt signaling pathway|positive regulation of Wnt signaling pathway|positive regulation of cell growth|negative regulation of cysteine-type endopeptidase activity involved in apoptotic process|positive regulat…	protein serine/threonine kinase activity|protein serine/threonine kinase activity|protein binding|ATP binding|protein N-terminus binding|Hsp90 protein binding|	10	-1.2	4.67	10	-2.2	19.5	-1.1	23.2	0.0009	-2.6	-0.6	0	0	0
ENSG00000136270	TBRG4	transforming growth factor beta regulator 4	mitochondrion|	mitotic G1 phase|protein phosphorylation|cell cycle arrest|positive regulation of cell proliferation|cellular respiration|	protein kinase activity|poly(A) RNA binding|	10	-1.5	6.52	10	-1.4	17.1	-1.5	23.2	0.0009	-2.3	-1	0	0	0
ENSG00000105677	TMEM147	transmembrane protein 147	endoplasmic reticulum membrane|integral component of membrane|	None	None	9	1.1	4.49	9	1.2	19	1.2	23.1	0.00092	0.7	1.9	0	0	0
ENSG00000169288	MRPL1	mitochondrial ribosomal protein L1	nucleus|mitochondrion|large ribosomal subunit|	translation|	structural constituent of ribosome|poly(A) RNA binding|	10	-1.1	7.19	10	-1.2	16.3	-1.2	23	0.00095	-2.1	-0.6	0	0	0
ENSG00000008952	SEC62	SEC62 homolog (S. cerevisiae)	endoplasmic reticulum|endoplasmic reticulum membrane|rough endoplasmic reticulum|membrane|integral component of membrane|	cotranslational protein targeting to membrane|posttranslational protein targeting to membrane|	receptor activity|protein transporter activity|	9	4	26	9	-1	7.03	4	22.7	0.00101	1	7.3	0	0	0
ENSG00000175792	RUVBL1	RuvB-like AAA ATPase 1	Swr1 complex|nucleus|nucleoplasm|cytoplasm|Golgi apparatus|microtubule organizing center|membrane|nuclear matrix|Ino80 complex|NuA4 histone acetyltransferase complex|intracellular membrane-bounded organelle|extracellular vesicular exosome|MLL1 complex|	DNA repair|DNA recombination|chromatin organization|nucleosome assembly|transcription, DNA-templated|regulation of transcription from RNA polymerase II promoter|mitotic nuclear division|spermatogenesis|DNA duplex unwinding|DNA duplex unwinding|centromere-specific nucleosome assembly|regulation of growth|histone H4 acetylation|histone H2A acetylation|	DNA helicase activity|protein binding|ATP binding|	10	-2.5	5.23	7	-1.3	18.6	-1.3	22.6	0.00108	-2.9	-0.9	0	0	0
ENSG00000135387	CAPRIN1	cell cycle associated protein 1	cytoplasmic mRNA processing body|cytoplasm|cytosol|integral component of plasma membrane|cytoplasmic stress granule|membrane|dendrite|	negative regulation of translation|positive regulation of dendrite morphogenesis|positive regulation of dendritic spine morphogenesis|	RNA binding|poly(A) RNA binding|	10	-2.2	2.46	10	-1.4	20.9	-1.5	22.6	0.00108	-2.5	-0.7	0	0	0
ENSG00000164548	TRA2A	transformer 2 alpha homolog (Drosophila)	nucleus|nucleolus|intracellular membrane-bounded organelle|	mRNA splicing, via spliceosome|	nucleotide binding|poly(A) RNA binding|	10	-1.4	10.1	9	-1	13.7	-1.2	22.4	0.00114	-1.9	-0.7	0	0	0
ENSG00000163159	VPS72	vacuolar protein sorting 72 homolog (S. cerevisiae)	nucleus|nucleoplasm|protein complex|	negative regulation of transcription from RNA polymerase II promoter|chromatin organization|transcription, DNA-templated|chromatin modification|somatic stem cell maintenance|	DNA binding|protein binding|	10	-2.1	15	9	-1.7	8.38	-1.8	22.4	0.00114	-3.1	-1.2	0	0	0
ENSG00000212993	POU5F1B	POU class 5 homeobox 1B	nucleus|	transcription, DNA-templated|regulation of transcription, DNA-templated|	sequence-specific DNA binding transcription factor activity|sequence-specific DNA binding|	9	3.8	19.3	9	1.2	8.95	3.4	22.2	0.00127	0.7	6	0	0	0
ENSG00000189079	ARID2	AT rich interactive domain 2 (ARID, RFX-like)	nucleus|	nucleosome disassembly|transcription, DNA-templated|regulation of transcription, DNA-templated|chromatin modification|	DNA binding|protein binding|metal ion binding|	9	-1.5	11.6	9	-1.5	10.9	-1.5	22.1	0.00128	-2.3	-0.9	0	0	0
ENSG00000111229	ARPC3	actin related protein 2/3 complex, subunit 3, 21kDa	cytosol|Arp2/3 protein complex|actin cytoskeleton|membrane|lamellipodium|extracellular vesicular exosome|	cellular component movement|Arp2/3 complex-mediated actin nucleation|Fc-gamma receptor signaling pathway involved in phagocytosis|innate immune response|	actin binding|structural constituent of cytoskeleton|protein binding|	9	-2.4	20.1	9	-0.8	8.01	-1.9	22.1	0.00128	-3.2	-0.7	0	0	0
ENSG00000073849	ST6GAL1	ST6 beta-galactosamide alpha-2,6-sialyltranferase 1	Golgi membrane|integral component of Golgi membrane|Golgi cisterna membrane|extracellular vesicular exosome|	N-acetylneuraminate metabolic process|humoral immune response|O-glycan processing|protein N-linked glycosylation via asparagine|protein N-linked glycosylation via asparagine|post-translational protein modification|cellular protein metabolic process|sialylation|	beta-galactoside alpha-2,6-sialyltransferase activity|sialyltransferase activity|	10	-0.6	1.46	10	-1.2	21.4	-1.1	22.1	0.00128	-1.8	-0.6	0	0	0
ENSG00000181789	COPG1	coatomer protein complex, subunit gamma 1	Golgi membrane|cytosol|COPI vesicle coat|	intracellular protein transport|retrograde vesicle-mediated transport, Golgi to ER|COPI coating of Golgi vesicle|establishment of Golgi localization|membrane organization|organelle transport along microtubule|	structural molecule activity|protein binding|	8	-1.6	6	9	-1.2	17.1	-1.2	22	0.00131	-2.1	-0.7	0	0	0
ENSG00000240432	KRTAP13-3	keratin associated protein 13-3	intermediate filament|	None	None	10	0.6	0.936	10	2.6	23.4	2.5	22	0.00131	1.5	5	0	0	0
ENSG00000157837	SPPL3	signal peptide peptidase like 3	rough endoplasmic reticulum|Golgi-associated vesicle membrane|integral component of cytoplasmic side of endoplasmic reticulum membrane|integral component of lumenal side of endoplasmic reticulum membrane|	None	aspartic endopeptidase activity, intramembrane cleaving|protein homodimerization activity|	10	-0.7	0.474	10	-0.9	21.7	-0.8	21.9	0.00137	-1.3	-0.5	0	0	0
ENSG00000108578	BLMH	bleomycin hydrolase	nucleus|cytoplasm|cytosol|extracellular vesicular exosome|	protein polyubiquitination|antigen processing and presentation of peptide antigen via MHC class I|proteolysis|response to toxic substance|response to drug|	aminopeptidase activity|carboxypeptidase activity|cysteine-type endopeptidase activity|protein binding|cysteine-type peptidase activity|	10	3.7	24.3	10	0.8	2.12	3.4	21.9	0.00137	0.6	6.1	0	0	0
ENSG00000141552	ANAPC11	anaphase promoting complex subunit 11	nucleus|nucleoplasm|anaphase-promoting complex|nucleolus|cytosol|	mitotic cell cycle|mitotic nuclear division|mitotic spindle assembly checkpoint|protein ubiquitination|anaphase-promoting complex-dependent proteasomal ubiquitin-dependent protein catabolic process|negative regulation of ubiquitin-protein ligase activity involved in mitotic cell cycle|positive regulation of ubiquitin-protein ligase activity involved in mitotic cell cycle|regulation of ubiquitin-p…	ubiquitin-protein transferase activity|zinc ion binding|	8	-1.4	10.3	9	-1.2	12.1	-1.3	21.9	0.00137	-2.1	-0.9	0	0	0
ENSG00000071564	TCF3	transcription factor 3	nuclear nucleosome|nuclear chromatin|nucleus|nucleus|nucleoplasm|transcription factor complex|cytoplasm|protein complex|	negative regulation of transcription from RNA polymerase II promoter|natural killer cell differentiation|B cell lineage commitment|B cell lineage commitment|transcription, DNA-templated|regulation of transcription, DNA-templated|B cell differentiation|positive regulation of B cell proliferation|response to lipopolysaccharide|T cell differentiation in thymus|immunoglobulin V(D)J recombination|resp…	RNA polymerase II core promoter proximal region sequence-specific DNA binding|RNA polymerase II core promoter proximal region sequence-specific DNA binding transcription factor activity involved in negative regulation of transcription|DNA binding|DNA binding|DNA binding|chromatin binding|sequence-specific DNA binding transcription factor activity|sequence-specific DNA binding transcription factor…	10	-1.1	6.48	9	-1.2	15.8	-1.1	21.9	0.00137	-2	-0.7	0	0	0
ENSG00000175110	MRPS22	mitochondrial ribosomal protein S22	mitochondrion|mitochondrial ribosome|mitochondrial small ribosomal subunit|	biological_process|	structural constituent of ribosome|	10	-0.1	0.0789	10	-1.3	23.5	-1.3	21.8	0.00143	-2.2	-0.7	0	0	0
ENSG00000115128	SF3B14	N/A	None	None	None	10	1.5	2.89	9	1.3	19.4	1.4	21.8	0.00143	0.8	2.4	0	0	0
ENSG00000164494	PDSS2	prenyl (decaprenyl) diphosphate synthase, subunit 2	cytoplasm|mitochondrial matrix|	ubiquinone biosynthetic process|ubiquinone biosynthetic process|ubiquinone biosynthetic process|isoprenoid biosynthetic process|small molecule metabolic process|regulation of body fluid levels|protein heterotetramerization|	trans-hexaprenyltranstransferase activity|protein heterodimerization activity|trans-octaprenyltranstransferase activity|	9	-2	10.5	7	-1.7	12.4	-1.8	21.8	0.00143	-3	-1.2	0	0	0
ENSG00000111364	DDX55	DEAD (Asp-Glu-Ala-Asp) box polypeptide 55	membrane|	ATP catabolic process|	ATP binding|ATP-dependent helicase activity|poly(A) RNA binding|	8	2.1	14.4	8	1.1	10.8	1.9	21.8	0.00143	0.9	3.1	0	0	0
ENSG00000084092	NOA1	nitric oxide associated 1	mitochondrion|extrinsic component of mitochondrial inner membrane|	GTP catabolic process|apoptotic process|regulation of cell death|mitochondrial translation|ribosome biogenesis|regulation of cellular respiration|	GTPase activity|protein binding|GTP binding|poly(A) RNA binding|	10	-1.4	4.48	10	-1.3	17.5	-1.3	21.6	0.00154	-2.2	-0.8	0	0	0
ENSG00000103707	MTFMT	mitochondrial methionyl-tRNA formyltransferase	mitochondrion|	translational initiation|conversion of methionyl-tRNA to N-formyl-methionyl-tRNA|	methionyl-tRNA formyltransferase activity|	10	-1.3	7	9	-2.4	16.4	-2.2	21.6	0.00154	-3	-0.8	0	0	0
ENSG00000178127	NDUFV2	NADH dehydrogenase (ubiquinone) flavoprotein 2, 24kDa	mitochondrion|mitochondrial inner membrane|mitochondrial respiratory chain complex I|mitochondrial respiratory chain complex I|mitochondrial respiratory chain complex I|	mitochondrial electron transport, NADH to ubiquinone|mitochondrial electron transport, NADH to ubiquinone|nervous system development|respiratory electron transport chain|cellular metabolic process|small molecule metabolic process|cardiac muscle tissue development|	NADH dehydrogenase (ubiquinone) activity|NADH dehydrogenase (ubiquinone) activity|electron carrier activity|metal ion binding|2 iron, 2 sulfur cluster binding|	10	-1	4	10	-1.8	19.2	-1.8	21.5	0.00159	-2.7	-0.9	0	0	0
ENSG00000188647	PTAR1	protein prenyltransferase alpha subunit repeat containing 1	None	protein prenylation|	protein prenyltransferase activity|	10	-0.9	3.39	10	-1.8	20.3	-1.7	21.4	0.00162	-2.8	-1	0	0	0
ENSG00000109670	FBXW7	F-box and WD repeat domain containing 7, E3 ubiquitin protein ligase	nucleus|nucleoplasm|nucleoplasm|nucleolus|endoplasmic reticulum|Golgi apparatus|SCF ubiquitin ligase complex|protein complex|	vasculogenesis|vasculature development|regulation of transcription, DNA-templated|cellular response to DNA damage stimulus|sister chromatid cohesion|Notch signaling pathway|negative regulation of triglyceride biosynthetic process|regulation of lipid storage|viral process|protein ubiquitination|lung development|SCF-dependent proteasomal ubiquitin-dependent protein catabolic process|negative regula…	sequence-specific DNA binding transcription factor activity|protein binding|identical protein binding|	10	-1.6	8.1	10	-1.9	13.7	-1.8	21.4	0.00162	-3	-1	0	0	0
ENSG00000125733	TRIP10	thyroid hormone receptor interactor 10	phagocytic cup|nucleus|cytoplasm|lysosome|Golgi apparatus|cytosol|cytoskeleton|cell cortex|cell projection|intracellular membrane-bounded organelle|perinuclear region of cytoplasm|extracellular vesicular exosome|	endocytosis|cell communication|signal transduction|small GTPase mediated signal transduction|actin cytoskeleton organization|regulation of small GTPase mediated signal transduction|	protein binding|lipid binding|identical protein binding|	10	-2.1	1.12	9	2.7	24.5	2.7	21.3	0.00176	2	5	0	0	0
ENSG00000118420	UBE3D	ubiquitin protein ligase E3D	cytoplasm|	protein ubiquitination|	ligase activity|	10	-0.9	2.01	10	-1.4	20.6	-1.3	21.3	0.00176	-2.1	-0.8	0	0	0
ENSG00000115866	DARS	aspartyl-tRNA synthetase	cytoplasm|cytosol|membrane|extracellular vesicular exosome|	translation|tRNA aminoacylation for protein translation|aspartyl-tRNA aminoacylation|protein complex assembly|gene expression|	aminoacylase activity|aspartate-tRNA ligase activity|protein binding|ATP binding|poly(A) RNA binding|	8	3.9	24.2	8	-1.8	7.52	3.8	21.3	0.00176	1.5	8	0	0	0
ENSG00000198563	DDX39B	DEAD (Asp-Glu-Ala-Asp) box polypeptide 39B	transcription export complex|nucleus|spliceosomal complex|U4 snRNP|U6 snRNP|cytoplasm|nuclear speck|	spliceosomal complex assembly|mRNA splicing, via spliceosome|ATP catabolic process|ATP catabolic process|mRNA export from nucleus|mRNA export from nucleus|RNA splicing|RNA secondary structure unwinding|positive regulation of DNA-templated transcription, elongation|viral mRNA export from host cell nucleus|negative regulation of DNA damage checkpoint|	ATP-dependent RNA helicase activity|protein binding|ATP binding|RNA-dependent ATPase activity|U6 snRNA binding|U4 snRNA binding|ATP-dependent protein binding|poly(A) RNA binding|	9	-2.5	2.85	9	-1.2	20.3	-1.3	21.2	0.00181	-2.6	-0.7	0	0	0
ENSG00000162923	WDR26	WD repeat domain 26	nucleus|cytoplasm|	None	None	10	-0.8	4.37	10	-1.1	17.6	-1	21.2	0.00181	-1.6	-0.6	0	0	0
ENSG00000131495	NDUFA2	NADH dehydrogenase (ubiquinone) 1 alpha subcomplex, 2, 8kDa	mitochondrial inner membrane|mitochondrial respiratory chain complex I|mitochondrial respiratory chain complex I|mitochondrial membrane|	mitochondrial electron transport, NADH to ubiquinone|respiratory electron transport chain|cellular metabolic process|small molecule metabolic process|	NADH dehydrogenase (ubiquinone) activity|	10	-1.8	5.42	9	-2.3	16.8	-2.1	21.1	0.00189	-3.4	-1.3	0	0	0
ENSG00000162396	PARS2	prolyl-tRNA synthetase 2, mitochondrial (putative)	mitochondrial matrix|	tRNA aminoacylation for protein translation|prolyl-tRNA aminoacylation|gene expression|	proline-tRNA ligase activity|ATP binding|	9	-0.6	1.15	9	1.5	22.4	1.5	21.1	0.00189	0.9	2.5	0	0	0
ENSG00000106263	EIF3B	eukaryotic translation initiation factor 3, subunit B	cytosol|eukaryotic translation initiation factor 3 complex|eukaryotic 43S preinitiation complex|eukaryotic 48S preinitiation complex|extracellular vesicular exosome|	formation of translation preinitiation complex|translation|translational initiation|translational initiation|translational initiation|regulation of translational initiation|gene expression|cellular protein metabolic process|	nucleotide binding|translation initiation factor activity|translation initiation factor activity|translation initiation factor activity|protein binding|translation initiation factor binding|protein complex scaffold|	9	1.7	9.84	9	1.1	12.3	1.4	21	0.00198	0.7	2.2	0	0	0
ENSG00000176248	ANAPC2	anaphase promoting complex subunit 2	nucleoplasm|anaphase-promoting complex|cytosol|	regulation of cyclin-dependent protein serine/threonine kinase activity|mitotic cell cycle|ubiquitin-dependent protein catabolic process|mitotic nuclear division|mitotic spindle assembly checkpoint|cyclin catabolic process|anaphase-promoting complex-dependent proteasomal ubiquitin-dependent protein catabolic process|positive regulation of synaptic plasticity|positive regulation of axon extension|…	ubiquitin-protein transferase activity|ubiquitin protein ligase binding|	9	-1.8	12.3	10	-2.3	9.07	-2.3	20.8	0.00214	-3.8	-1.3	0	0	0
ENSG00000255639	RP11-234B24.6	N/A	None	None	None	9	-1.9	4.12	10	-1.7	17.2	-1.8	20.8	0.00214	-2.6	-0.7	0	0	0
ENSG00000149084	HSD17B12	hydroxysteroid (17-beta) dehydrogenase 12	endoplasmic reticulum membrane|integral component of membrane|extracellular matrix|	fatty acid biosynthetic process|estrogen biosynthetic process|positive regulation of cell-substrate adhesion|triglyceride biosynthetic process|extracellular matrix organization|long-chain fatty-acyl-CoA biosynthetic process|cellular lipid metabolic process|small molecule metabolic process|oxidation-reduction process|	fibronectin binding|estradiol 17-beta-dehydrogenase activity|protein binding|collagen binding|heparin binding|	10	-0.7	5.34	9	-2.5	18.1	-0.9	20.7	0.00218	-3.1	-0.6	0	0	0
ENSG00000101365	IDH3B	isocitrate dehydrogenase 3 (NAD+) beta	nucleus|mitochondrion|mitochondrial matrix|	tricarboxylic acid cycle|isocitrate metabolic process|2-oxoglutarate metabolic process|NADH metabolic process|cellular metabolic process|small molecule metabolic process|	magnesium ion binding|isocitrate dehydrogenase (NAD+) activity|electron carrier activity|NAD binding|	10	-1.2	8.73	10	-1.1	12.4	-1.2	20.7	0.00218	-2.1	-0.6	0	0	0
ENSG00000156990	RPUSD3	RNA pseudouridylate synthase domain containing 3	None	pseudouridine synthesis|	pseudouridine synthase activity|poly(A) RNA binding|	10	-1.2	6.6	10	-1.2	14.5	-1.2	20.7	0.00218	-1.9	-0.7	0	0	0
ENSG00000185608	MRPL40	mitochondrial ribosomal protein L40	nucleus|nucleolus|mitochondrion|mitochondrial ribosome|	anatomical structure morphogenesis|	poly(A) RNA binding|	8	-2.1	8.96	10	-1.2	14.3	-1.3	20.7	0.00218	-2.6	-0.9	0	0	0
ENSG00000112893	MAN2A1	mannosidase, alpha, class 2A, member 1	Golgi membrane|membrane|integral component of membrane|extracellular vesicular exosome|	in utero embryonic development|liver development|mannose metabolic process|N-glycan processing|mitochondrion organization|vacuole organization|respiratory gaseous exchange|protein N-linked glycosylation via asparagine|post-translational protein modification|cellular protein metabolic process|lung alveolus development|positive regulation of neurogenesis|retina morphogenesis in camera-type eye|	mannosyl-oligosaccharide 1,3-1,6-alpha-mannosidase activity|zinc ion binding|hydrolase activity, hydrolyzing N-glycosyl compounds|carbohydrate binding|	10	-2	0.818	9	1	22.4	1	20.6	0.00221	0.6	1.6	0	0	0
ENSG00000128340	RAC2	ras-related C3 botulinum toxin substrate 2 (rho family, small GTP binding protein Rac2)	nuclear envelope|cytosol|plasma membrane|extracellular vesicular exosome|	GTP catabolic process|signal transduction|small GTPase mediated signal transduction|axon guidance|blood coagulation|positive regulation of cell proliferation|regulation of hydrogen peroxide metabolic process|cell projection assembly|actin cytoskeleton organization|platelet activation|bone resorption|regulation of small GTPase mediated signal transduction|regulation of respiratory burst|	GTPase activity|GTP binding|	9	-1.5	15.6	9	-1.1	5.79	-1.4	20.5	0.00229	-2.2	-0.8	0	0	0
ENSG00000176340	COX8A	cytochrome c oxidase subunit VIIIA (ubiquitous)	mitochondrial inner membrane|integral component of membrane|	generation of precursor metabolites and energy|respiratory electron transport chain|cellular metabolic process|small molecule metabolic process|hydrogen ion transmembrane transport|hydrogen ion transmembrane transport|	cytochrome-c oxidase activity|	5	-2.2	15.4	5	-1	8.46	-2	20.5	0.00229	-3.5	-0.9	0	0	0
ENSG00000169967	MAP3K2	mitogen-activated protein kinase kinase kinase 2	nucleus|cytoplasm|cytosol|	activation of MAPKK activity|activation of MAPK activity|protein phosphorylation|activation of JUN kinase activity|positive regulation of transcription, DNA-templated|cellular response to mechanical stimulus|	protein kinase activity|protein serine/threonine kinase activity|MAP kinase kinase kinase activity|protein binding|ATP binding|protein kinase binding|metal ion binding|	10	1.3	4.81	10	1	16	1.2	20.4	0.00239	0.6	1.9	0	0	0
ENSG00000163519	TRAT1	T cell receptor associated transmembrane adaptor 1	plasma membrane|plasma membrane|integral component of plasma membrane|T cell receptor complex|	negative regulation of receptor recycling|cellular defense response|signal transduction|epidermal growth factor receptor signaling pathway|fibroblast growth factor receptor signaling pathway|Fc-epsilon receptor signaling pathway|innate immune response|neurotrophin TRK receptor signaling pathway|phosphatidylinositol-mediated signaling|positive regulation of calcium-mediated signaling|T cell recept…	transmembrane receptor protein tyrosine kinase adaptor activity|	10	4.6	21.6	10	1	4.65	4.5	20.3	0.00245	1.7	9	0	0	0
ENSG00000108669	CYTH1	cytohesin 1	cytoplasm|cytosol|plasma membrane|tight junction|extrinsic component of cytoplasmic side of plasma membrane|	regulation of cell adhesion|regulation of ARF protein signal transduction|positive regulation of GTPase activity|positive regulation of GTPase activity|positive regulation of GTPase activity|positive regulation of GTPase activity|establishment of epithelial cell polarity|	ARF guanyl-nucleotide exchange factor activity|ARF guanyl-nucleotide exchange factor activity|protein binding|lipid binding|	10	-1.8	9.83	10	-1	13.3	-1.2	20.3	0.00245	-2.2	-0.7	0	0	0
ENSG00000204564	C6ORF136	chromosome 6 open reading frame 136	mitochondrion|	None	None	10	-1.4	3.83	10	-1.2	16.7	-1.2	20.2	0.0025	-2.2	-0.7	0	0	0
ENSG00000147382	FAM58A	family with sequence similarity 58, member A	None	regulation of cyclin-dependent protein serine/threonine kinase activity|regulation of transcription, DNA-templated|	protein binding|protein kinase binding|	10	-1.4	10.3	9	-1	10.9	-1.3	20.2	0.0025	-2	-0.8	0	0	0
ENSG00000162702	ZNF281	zinc finger protein 281	nucleus|	transcription, DNA-templated|embryonic body morphogenesis|negative regulation of gene expression|negative regulation of gene expression|negative regulation of transcription, DNA-templated|negative regulation of transcription, DNA-templated|positive regulation of transcription, DNA-templated|stem cell differentiation|	core promoter binding|sequence-specific DNA binding transcription factor activity|transcription corepressor activity|protein binding|sequence-specific DNA binding|transcription regulatory region DNA binding|metal ion binding|	10	-1.5	8.13	10	-1.1	12.7	-1.2	20.1	0.00261	-2.3	-0.8	0	0	0
ENSG00000101310	SEC23B	Sec23 homolog B (S. cerevisiae)	Golgi membrane|endoplasmic reticulum membrane|endomembrane system|membrane|COPII vesicle coat|endoplasmic reticulum-Golgi intermediate compartment membrane|intracellular membrane-bounded organelle|perinuclear region of cytoplasm|	intracellular protein transport|ER to Golgi vesicle-mediated transport|vesicle-mediated transport|	zinc ion binding|	10	-1.1	4.19	10	-0.9	16.4	-1	20.1	0.00261	-1.5	-0.5	0	0	0
ENSG00000103150	MLYCD	malonyl-CoA decarboxylase	cytoplasm|mitochondrion|mitochondrial matrix|peroxisome|peroxisomal matrix|peroxisomal matrix|	response to ischemia|acetyl-CoA biosynthetic process|acetyl-CoA biosynthetic process|fatty acid biosynthetic process|regulation of glucose metabolic process|cellular lipid metabolic process|small molecule metabolic process|positive regulation of fatty acid oxidation|malonyl-CoA catabolic process|	receptor binding|malonyl-CoA decarboxylase activity|	10	-1.1	3.68	10	-1.2	16.7	-1.2	20	0.00272	-2	-0.7	0	0	0
ENSG00000171150	SOCS5	suppressor of cytokine signaling 5	None	epidermal growth factor receptor signaling pathway|negative regulation of epidermal growth factor-activated receptor activity|JAK-STAT cascade|negative regulation of signal transduction|cell growth|protein ubiquitination|cytokine-mediated signaling pathway|positive regulation of proteasomal ubiquitin-dependent protein catabolic process|regulation of growth|positive regulation of T-helper 1 cell d…	epidermal growth factor receptor binding|protein binding|receptor tyrosine kinase binding|	10	1.5	2.46	10	1	18.2	1	20	0.00272	0.6	1.9	0	0	0
ENSG00000120805	ARL1	ADP-ribosylation factor-like 1	Golgi membrane|cytoplasm|Golgi apparatus|trans-Golgi network|extracellular vesicular exosome|	GTP catabolic process|Golgi organization|small GTPase mediated signal transduction|toxin metabolic process|activation of phospholipase D activity|protein localization to Golgi apparatus|retrograde transport, endosome to Golgi|Golgi vesicle transport|	GTPase activity|GTP binding|enzyme activator activity|protein domain specific binding|metal ion binding|	10	-1	5.34	10	-1.2	15.1	-1.1	20	0.00272	-1.7	-0.7	0	0	0
ENSG00000255339	NDUFB8	NADH dehydrogenase (ubiquinone) 1 beta subcomplex, 8, 19kDa	mitochondrial inner membrane|mitochondrial respiratory chain complex I|mitochondrial respiratory chain complex I|endoplasmic reticulum|integral component of membrane|	mitochondrial electron transport, NADH to ubiquinone|respiratory electron transport chain|cellular metabolic process|small molecule metabolic process|	NADH dehydrogenase (ubiquinone) activity|	10	-1	8.58	10	-1.2	11.9	-1.2	20	0.00272	-1.8	-0.6	0	0	0
ENSG00000102870	ZNF629	zinc finger protein 629	nucleus|	transcription, DNA-templated|regulation of transcription, DNA-templated|	DNA binding|sequence-specific DNA binding transcription factor activity|metal ion binding|	10	2.5	14.2	9	0.9	11.9	1.3	20	0.00272	0.7	3.2	0	0	0
ENSG00000134516	DOCK2	dedicator of cytokinesis 2	cytosol|cytoskeleton|endomembrane system|membrane|extracellular vesicular exosome|	membrane raft polarization|establishment of T cell polarity|immunological synapse formation|myeloid dendritic cell activation involved in immune response|chemotaxis|small GTPase mediated signal transduction|viral process|actin cytoskeleton organization|positive regulation of Rac GTPase activity|macropinocytosis|positive thymic T cell selection|negative thymic T cell selection|alpha-beta T cell pr…	protein binding|Rac GTPase activator activity|Rac guanyl-nucleotide exchange factor activity|T cell receptor binding|	10	-2.3	13.2	10	-1.3	9.04	-1.8	19.8	0.00295	-3.1	-1	0	0	0
ENSG00000110536	PTPMT1	protein tyrosine phosphatase, mitochondrial 1	nucleus|mitochondrion|mitochondrial inner membrane|	protein dephosphorylation|phospholipid metabolic process|phosphatidylglycerol biosynthetic process|cardiolipin biosynthetic process|peptidyl-tyrosine dephosphorylation|small molecule metabolic process|glycerophospholipid biosynthetic process|inositol phosphate dephosphorylation|	phosphatidylinositol-4,5-bisphosphate 5-phosphatase activity|protein tyrosine phosphatase activity|protein tyrosine/serine/threonine phosphatase activity|phosphatidylglycerophosphatase activity|	6	2.2	3.49	8	1.9	16.7	2	19.8	0.00295	1.2	3.5	0	0	0
ENSG00000105723	GSK3A	glycogen synthase kinase 3 alpha	cytosol|beta-catenin destruction complex|beta-catenin destruction complex|	regulation of systemic arterial blood pressure|cardiac left ventricle morphogenesis|glycogen metabolic process|protein phosphorylation|activation of signaling protein activity involved in unfolded protein response|epidermal growth factor receptor signaling pathway|nervous system development|insulin receptor signaling pathway|fibroblast growth factor receptor signaling pathway|negative regulation …	protein serine/threonine kinase activity|protein binding|ATP binding|protein kinase A catalytic subunit binding|tau-protein kinase activity|	10	-1.3	9.57	10	-1.1	10.9	-1.1	19.8	0.00295	-1.8	-0.7	0	0	0
ENSG00000166578	IQCD	IQ motif containing D	None	None	None	10	-1.4	5.65	10	-1.4	14.4	-1.4	19.7	0.00301	-2.2	-0.8	0	0	0
ENSG00000108091	CCDC6	coiled-coil domain containing 6	cytoplasm|cytoskeleton|	biological_process|	structural constituent of cytoskeleton|protein binding|SH3 domain binding|	10	-1	2.63	10	-1	17.3	-1	19.6	0.00309	-2.4	-0.6	0	0	0
ENSG00000116954	RRAGC	Ras-related GTP binding C	nucleus|cytoplasm|lysosome|intracellular membrane-bounded organelle|	GTP catabolic process|transcription, DNA-templated|apoptotic process|small GTPase mediated signal transduction|RNA splicing|cell growth|cellular protein localization|cellular response to amino acid stimulus|	magnesium ion binding|GTPase activity|protein binding|GTP binding|GDP binding|protein heterodimerization activity|	9	-1.9	14.3	8	-1.4	6.33	-1.6	19.6	0.00309	-3.1	-1	0	0	0
ENSG00000104859	CLASRP	CLK4-associating serine/arginine rich protein	nucleus|	mRNA processing|RNA splicing|	None	10	-1	4.48	9	-1.5	15.8	-1.1	19.5	0.00324	-2.1	-0.7	0	0	0
ENSG00000130921	C12ORF65	chromosome 12 open reading frame 65	mitochondrion|	translational termination|cell death|	translation release factor activity|	8	-0.6	1.66	8	-1.6	20.2	-1.5	19.5	0.00324	-2.5	-0.8	0	0	0
ENSG00000168259	DNAJC7	DnaJ (Hsp40) homolog, subfamily C, member 7	nucleus|cytoplasm|cytoskeleton|membrane|extracellular vesicular exosome|	protein folding|chaperone cofactor-dependent protein refolding|	protein binding|heat shock protein binding|	10	-1.4	8.07	10	-1	12.2	-1.3	19.5	0.00324	-2.4	-0.6	0	0	0
ENSG00000123144	C19ORF43	chromosome 19 open reading frame 43	None	None	None	9	-1.7	3.74	9	-1.3	16.1	-1.3	19.4	0.00334	-2.4	-0.9	0	0	0
ENSG00000125755	SYMPK	symplekin	nucleus|nucleoplasm|cytoplasm|cytoskeleton|plasma membrane|tight junction|	mRNA polyadenylation|cell adhesion|positive regulation of protein dephosphorylation|	protein binding|	9	-1.5	8.08	8	-1	12.4	-1.3	19.4	0.00334	-2.1	-0.7	0	0	0
ENSG00000003402	CFLAR	CASP8 and FADD-like apoptosis regulator	cytoplasm|cytosol|death-inducing signaling complex|CD95 death-inducing signaling complex|ripoptosome|	proteolysis|apoptotic process|apoptotic process|skeletal muscle tissue development|skeletal muscle atrophy|regulation of satellite cell proliferation|skeletal myofibril assembly|viral process|negative regulation of apoptotic process|positive regulation of catalytic activity|positive regulation of I-kappaB kinase/NF-kappaB signaling|skeletal muscle tissue regeneration|positive regulation of NF-kap…	protease binding|protein binding|enzyme activator activity|death effector domain binding|	9	-0.3	0.453	10	-1.3	20.6	-1.2	19.4	0.00334	-2.2	-0.7	0	0	0
ENSG00000175189	INHBC	inhibin, beta C	extracellular region|extracellular vesicular exosome|	growth|	transforming growth factor beta receptor binding|hormone activity|growth factor activity|	10	-1.5	2.34	10	2.7	22.2	2.6	19.4	0.00334	1.9	5	0	0	0
ENSG00000168310	IRF2	interferon regulatory factor 2	nucleoplasm|cytosol|	negative regulation of transcription from RNA polymerase II promoter|transcription, DNA-templated|regulation of transcription, DNA-templated|blood coagulation|cell proliferation|cytokine-mediated signaling pathway|interferon-gamma-mediated signaling pathway|type I interferon signaling pathway|	regulatory region DNA binding|DNA binding|sequence-specific DNA binding transcription factor activity|protein binding|	9	-0.9	2.23	9	-1.3	18.2	-1.2	19.4	0.00334	-1.8	-0.7	0	0	0
ENSG00000244462	RBM12	RNA binding motif protein 12	nucleus|	None	nucleotide binding|poly(A) RNA binding|	10	-2.1	19.6	10	-0.7	4.88	-1.9	19.4	0.00334	-3.6	-0.8	0	0	0
ENSG00000186452	TMPRSS12	transmembrane (C-terminal) protease, serine 12	integral component of membrane|	proteolysis|	serine-type endopeptidase activity|	10	4.4	21.6	10	0.8	3.35	4.3	19.3	0.00344	1.7	8	0	0	0
ENSG00000173153	ESRRA	estrogen-related receptor alpha	nucleus|nucleoplasm|nucleolus|microtubule cytoskeleton|intercellular bridge|	regulation of transcription, DNA-templated|transcription initiation from RNA polymerase II promoter|gene expression|intracellular receptor signaling pathway|regulation of cell proliferation|steroid hormone mediated signaling pathway|regulation of osteoblast differentiation|regulation of osteoclast differentiation|positive regulation of transcription from RNA polymerase II promoter|cartilage devel…	DNA binding|steroid hormone receptor activity|ligand-activated sequence-specific DNA binding RNA polymerase II transcription factor activity|steroid binding|protein binding|zinc ion binding|protein domain specific binding|sequence-specific DNA binding|	10	-1.4	13.5	10	-0.7	8.56	-1	19.3	0.00344	-1.9	-0.6	0	0	0
ENSG00000143224	PPOX	protoporphyrinogen oxidase	mitochondrial intermembrane space|intrinsic component of mitochondrial inner membrane|integral component of mitochondrial inner membrane|mitochondrial membrane|	porphyrin-containing compound metabolic process|porphyrin-containing compound biosynthetic process|protoporphyrinogen IX biosynthetic process|heme biosynthetic process|heme biosynthetic process|response to drug|small molecule metabolic process|oxidation-reduction process|	oxygen-dependent protoporphyrinogen oxidase activity|oxygen-dependent protoporphyrinogen oxidase activity|flavin adenine dinucleotide binding|	10	-0.7	2.89	10	-1	17.1	-1	19.2	0.0036	-1.5	-0.6	0	0	0
ENSG00000143252	SDHC	succinate dehydrogenase complex, subunit C, integral membrane protein, 15kDa	mitochondrion|mitochondrial inner membrane|mitochondrial inner membrane|mitochondrial respiratory chain complex II|integral component of membrane|respiratory chain complex II|	tricarboxylic acid cycle|tricarboxylic acid cycle|aerobic respiration|respiratory electron transport chain|cellular metabolic process|small molecule metabolic process|oxidation-reduction process|	succinate dehydrogenase activity|electron carrier activity|heme binding|metal ion binding|	10	-2.8	4.9	10	-2.5	14.9	-2.6	19.2	0.0036	-4.9	-1.8	0	0	0
ENSG00000143575	HAX1	HCLS1 associated protein X-1	nuclear envelope|transcription factor complex|mitochondrion|endoplasmic reticulum|actin cytoskeleton|cytoplasmic membrane-bounded vesicle|sarcoplasmic reticulum|lamellipodium|nuclear membrane|	positive regulation of phosphatidylinositol 3-kinase signaling|regulation of actin filament polymerization|positive regulation of granulocyte differentiation|positive regulation of peptidyl-serine phosphorylation|positive regulation of transcription from RNA polymerase II promoter|positive regulation of peptidyl-tyrosine phosphorylation|positive regulation of protein kinase B signaling|cellular r…	protein binding|interleukin-1 binding|protein N-terminus binding|	9	-3.1	2.91	9	-1.9	18.5	-2	19.1	0.00375	-4.6	-1.4	0	0	0
ENSG00000100439	ABHD4	abhydrolase domain containing 4	None	lipid catabolic process|	hydrolase activity|	10	-5	21.7	10	-0.6	6.41	-4.9	19	0.00389	-10	-2.7	0	0	0
ENSG00000066044	ELAVL1	ELAV like RNA binding protein 1	nucleus|nucleoplasm|cytoplasm|cytosol|membrane|	multicellular organismal development|gene expression|RNA metabolic process|mRNA metabolic process|positive regulation of translation|mRNA stabilization|mRNA stabilization|3'-UTR-mediated mRNA stabilization|3'-UTR-mediated mRNA stabilization|regulation of stem cell maintenance|	nucleotide binding|RNA binding|double-stranded RNA binding|mRNA binding|mRNA 3'-UTR binding|protein binding|AU-rich element binding|protein kinase binding|mRNA 3'-UTR AU-rich region binding|poly(A) RNA binding|	10	-0.9	6.68	10	-2.1	15.4	-1.2	19	0.00389	-2.6	-0.7	0	0	0
ENSG00000110497	AMBRA1	autophagy/beclin-1 regulator 1	cytoplasm|autophagic vacuole|axoneme|cytoplasmic vesicle|	autophagy|negative regulation of cell proliferation|neural tube development|cell differentiation|negative regulation of neuron apoptotic process|	protein binding|	10	-1.9	0.948	10	-1.2	18.4	-1.2	18.9	0.00409	-2.1	-0.6	0	0	0
ENSG00000099795	NDUFB7	NADH dehydrogenase (ubiquinone) 1 beta subcomplex, 7, 18kDa	mitochondrion|mitochondrial inner membrane|mitochondrial respiratory chain complex I|mitochondrial intermembrane space|	mitochondrial electron transport, NADH to ubiquinone|respiratory electron transport chain|cellular metabolic process|small molecule metabolic process|	NADH dehydrogenase (ubiquinone) activity|	10	-1.9	6.16	8	-1.6	13.2	-1.6	18.8	0.00425	-2.7	-0.8	0	0	0
ENSG00000125965	GDF5	growth differentiation factor 5	extracellular region|extracellular space|plasma membrane|	chondrocyte differentiation|transforming growth factor beta receptor signaling pathway|cell-cell signaling|extracellular matrix organization|embryonic limb morphogenesis|positive regulation of chondrocyte differentiation|forelimb morphogenesis|hindlimb morphogenesis|growth|regulation of multicellular organism growth|negative regulation of neuron apoptotic process|positive regulation of neuron dif…	cytokine activity|protein binding|growth factor activity|	7	1.1	3.35	7	1.7	16.2	1.7	18.7	0.00444	1.1	2.7	0	0	0
ENSG00000130826	DKC1	dyskeratosis congenita 1, dyskerin	nucleus|nucleoplasm|telomerase holoenzyme complex|nucleolus|cytoplasm|Cajal body|	telomere maintenance|pseudouridine synthesis|rRNA processing|RNA processing|telomere maintenance via telomerase|cell proliferation|	telomerase activity|RNA binding|protein binding|pseudouridine synthase activity|poly(A) RNA binding|	7	2.3	8.29	9	1.6	11.7	1.7	18.7	0.00444	0.8	3.3	0	0	0
ENSG00000092148	HECTD1	HECT domain containing E3 ubiquitin protein ligase 1	nucleus|cytoplasm|	neural tube closure|protein ubiquitination involved in ubiquitin-dependent protein catabolic process|	ubiquitin-protein transferase activity|protein binding|ligase activity|metal ion binding|	9	-1.1	1.1	9	-1	17.9	-1.1	18.7	0.00444	-1.7	-0.6	0	0	0
ENSG00000122696	SLC25A51	solute carrier family 25, member 51	mitochondrial inner membrane|integral component of membrane|	transport|	None	10	-1.8	13.8	10	-1	6.46	-1.3	18.6	0.00455	-2.5	-0.8	0	0	0
ENSG00000188529	SRSF10	serine/arginine-rich splicing factor 10	nucleus|nucleoplasm|cytoplasm|nuclear speck|	spliceosomal tri-snRNP complex assembly|RNA splicing, via transesterification reactions|mRNA splicing, via spliceosome|regulation of transcription, DNA-templated|mRNA splice site selection|mRNA export from nucleus|cytoplasmic transport|negative regulation of mRNA splicing, via spliceosome|	nucleotide binding|RNA binding|protein binding|poly(A) RNA binding|RS domain binding|unfolded protein binding|	8	-0.7	2.15	8	-1.1	17.1	-1.1	18.6	0.00455	-2	-0.7	0	0	0
ENSG00000110074	FOXRED1	FAD-dependent oxidoreductase domain containing 1	mitochondrion|integral component of membrane|	biological_process|oxidation-reduction process|	oxidoreductase activity|	10	-1.2	4.54	10	-2.3	16.7	-1.4	18.6	0.00455	-3.1	-0.7	0	0	0
ENSG00000184432	COPB2	coatomer protein complex, subunit beta 2 (beta prime)	cytosol|COPI vesicle coat|	intracellular protein transport|retrograde vesicle-mediated transport, Golgi to ER|intra-Golgi vesicle-mediated transport|COPI coating of Golgi vesicle|membrane organization|	structural molecule activity|	10	-1.2	7.95	7	-1.6	11.8	-1.3	18.6	0.00455	-2.2	-0.7	0	0	0
ENSG00000141096	DPEP3	dipeptidase 3	anchored component of membrane|	proteolysis|male meiosis|	metalloexopeptidase activity|dipeptidyl-peptidase activity|dipeptidase activity|metal ion binding|	10	4.4	22.2	10	0.1	0.35	4.4	18.6	0.00455	2.9	8	0	0	0
ENSG00000197958	RPL12	ribosomal protein L12	cytosol|membrane|cytosolic large ribosomal subunit|extracellular vesicular exosome|	nuclear-transcribed mRNA catabolic process, nonsense-mediated decay|translation|translation|translational initiation|translational elongation|translational termination|SRP-dependent cotranslational protein targeting to membrane|gene expression|viral process|RNA metabolic process|mRNA metabolic process|viral life cycle|viral transcription|cellular protein metabolic process|	structural constituent of ribosome|protein binding|poly(A) RNA binding|	7	-2.3	17.4	7	-0.8	5.7	-2.1	18.6	0.00455	-3.6	-0.9	0	0	0
ENSG00000181803	OR6S1	olfactory receptor, family 6, subfamily S, member 1	plasma membrane|integral component of membrane|	G-protein coupled receptor signaling pathway|detection of chemical stimulus involved in sensory perception of smell|	G-protein coupled receptor activity|olfactory receptor activity|	10	3.7	21.5	10	-1.2	1.66	3.6	18.5	0.00471	1.2	7	0	0	0
ENSG00000138107	ACTR1A	ARP1 actin-related protein 1 homolog A, centractin alpha (yeast)	cytoplasm|centrosome|cytosol|dynactin complex|microtubule associated complex|extracellular vesicular exosome|	G2/M transition of mitotic cell cycle|mitotic cell cycle|vesicle-mediated transport|antigen processing and presentation of exogenous peptide antigen via MHC class II|	ATP binding|	10	-1.2	4.84	10	-0.9	14.2	-1	18.4	0.00487	-1.6	-0.5	0	0	0
ENSG00000259063	DUX4L5	double homeobox 4 like 5	None	None	None	7	2	1.89	7	-2.4	21.3	-2.3	18.4	0.00487	-4	2.4	0	0	0
ENSG00000009844	VTA1	vesicle (multivesicular body) trafficking 1	cytosol|endosome membrane|extracellular vesicular exosome|	protein transport|viral process|endosomal transport|viral life cycle|membrane organization|	protein binding|	10	-1.7	10	10	-1.9	8.81	-1.8	18.4	0.00487	-2.8	-0.8	0	0	0
ENSG00000205445	KRTAP10-2	keratin associated protein 10-2	keratin filament|	None	None	10	-1	4.26	9	-0.8	14.7	-0.9	18.4	0.00487	-1.6	-0.5	0	0	0
ENSG00000122958	VPS26A	vacuolar protein sorting 26 homolog A (S. pombe)	endosome|cytosol|cytosol|endosome membrane|vesicle|intracellular membrane-bounded organelle|extracellular vesicular exosome|	protein transport|retrograde transport, endosome to Golgi|	protein binding|protein transporter activity|	10	-1	3.48	10	-2	17.3	-1.5	18.4	0.00487	-2.9	-0.8	0	0	0
ENSG00000064489	MEF2BNB-MEF2B	MEF2BNB-MEF2B readthrough	None	None	None	5	-1.3	3.19	4	-1.6	15.7	-1.5	18.3	0.00505	-2.6	-0.8	0	0	0
ENSG00000204138	PHACTR4	phosphatase and actin regulator 4	cytoplasm|lamellipodium|	neural crest cell migration|neural tube closure|Rho protein signal transduction|actin cytoskeleton organization|positive regulation of catalytic activity|enteric nervous system development|regulation of cell cycle|closure of optic fissure|negative regulation of integrin-mediated signaling pathway|	actin binding|protein phosphatase 1 binding|protein phosphatase type 1 activator activity|	10	-1.6	8.27	10	-1	11.9	-1.1	18.3	0.00505	-2	-0.7	0	0	0
ENSG00000041357	PSMA4	proteasome (prosome, macropain) subunit, alpha type, 4	proteasome complex|cytoplasmic mRNA processing body|nucleus|nucleoplasm|cytosol|proteasome core complex|proteasome core complex, alpha-subunit complex|extracellular vesicular exosome|	G1/S transition of mitotic cell cycle|protein polyubiquitination|mitotic cell cycle|antigen processing and presentation of peptide antigen via MHC class I|antigen processing and presentation of exogenous peptide antigen via MHC class I, TAP-dependent|regulation of cellular amino acid metabolic process|apoptotic process|DNA damage response, signal transduction by p53 class mediator resulting in ce…	threonine-type endopeptidase activity|protein binding|	9	-2.4	3.66	9	1.1	17.7	1.3	18.3	0.00505	0.7	2.3	0	0	0
ENSG00000149187	CELF1	CUGBP, Elav-like family member 1	nucleus|nucleus|cytoplasm|membrane|ribonucleoprotein complex|	mRNA splice site selection|mRNA processing|germ cell development|spermatid development|embryo development|RNA interference|negative regulation of translation|positive regulation of multicellular organism growth|regulation of RNA splicing|	nucleotide binding|translation repressor activity, nucleic acid binding|RNA binding|mRNA binding|protein binding|translation initiation factor binding|BRE binding|poly(A) RNA binding|	10	1.1	2.48	10	0.9	16.4	0.9	18.3	0.00505	0.5	1.7	0	0	0
ENSG00000055070	SZRD1	SUZ RNA binding domain containing 1	None	None	None	10	-0.9	3.43	10	-0.8	15.1	-0.8	18.2	0.00521	-1.5	-0.5	0	0	0
ENSG00000184203	PPP1R2	protein phosphatase 1, regulatory (inhibitor) subunit 2	None	glycogen metabolic process|generation of precursor metabolites and energy|regulation of signal transduction|negative regulation of catalytic activity|negative regulation of catalytic activity|regulation of phosphoprotein phosphatase activity|	protein serine/threonine phosphatase inhibitor activity|protein binding|	10	-1.3	10.3	10	-2.3	10.2	-1.3	18	0.00555	-2.7	-0.6	0	0	0
ENSG00000105402	NAPA	N-ethylmaleimide-sensitive factor attachment protein, alpha	cytosol|membrane|synaptobrevin 2-SNAP-25-syntaxin-1a complex|extracellular vesicular exosome|	intracellular protein transport|intra-Golgi vesicle-mediated transport|post-Golgi vesicle-mediated transport|brain development|regulation of synaptic vesicle priming|neuron differentiation|synaptic transmission, glutamatergic|SNARE complex disassembly|apical protein localization|membrane organization|membrane fusion|	protein binding|syntaxin binding|	8	-1.4	6.71	8	-1.4	11.7	-1.4	18	0.00555	-2.5	-0.8	0	0	0
ENSG00000125912	NCLN	nicalin	endoplasmic reticulum membrane|membrane|integral component of membrane|	proteolysis|regulation of signal transduction|	protein binding|peptidase activity|	10	1.4	2.2	10	0.8	16.5	0.8	18	0.00555	0.5	1.6	0	0	0
ENSG00000136169	SETDB2	SET domain, bifurcated 2	nucleus|chromosome|	heart looping|chromosome segregation|mitotic nuclear division|negative regulation of transcription, DNA-templated|histone H3-K9 methylation|left/right axis specification|	DNA binding|zinc ion binding|histone methyltransferase activity (H3-K9 specific)|	10	3.9	21.4	10	-0.1	0.0472	3.9	17.9	0.00566	2.2	8	0	0	0
ENSG00000169676	DRD5	dopamine receptor D5	plasma membrane|plasma membrane|integral component of plasma membrane|integral component of plasma membrane|brush border membrane|	synaptic transmission, dopaminergic|response to amphetamine|regulation of systemic arterial blood pressure by vasopressin|norepinephrine-epinephrine vasoconstriction involved in regulation of systemic arterial blood pressure|cellular calcium ion homeostasis|adenylate cyclase-activating G-protein coupled receptor signaling pathway|activation of adenylate cyclase activity|adenylate cyclase-activati…	dopamine neurotransmitter receptor activity, coupled via Gs|dopamine neurotransmitter receptor activity|dopamine binding|	10	4.3	21.6	10	-0.2	0.517	4.3	17.9	0.00566	2.8	8	0	0	0
ENSG00000112699	GMDS	GDP-mannose 4,6-dehydratase	cytoplasm|extracellular vesicular exosome|	Notch signaling pathway|GDP-mannose metabolic process|GDP-mannose metabolic process|'de novo' GDP-L-fucose biosynthetic process|'de novo' GDP-L-fucose biosynthetic process|	GDP-mannose 4,6-dehydratase activity|GDP-mannose 4,6-dehydratase activity|NADP+ binding|	10	-1.5	5.68	10	-1.3	12.7	-1.4	17.9	0.00566	-2.2	-0.7	0	0	0
ENSG00000141141	DDX52	DEAD (Asp-Glu-Ala-Asp) box polypeptide 52	nucleus|nucleolus|membrane|	metabolic process|	helicase activity|ATP binding|poly(A) RNA binding|	10	-1.9	18.3	10	-0.6	4.96	-1.7	17.8	0.00581	-2.9	-0.7	0	0	0
ENSG00000117408	IPO13	importin 13	nucleus|cytoplasm|	protein import into nucleus|	protein binding|Ran GTPase binding|	10	-1.3	8.83	9	-1.3	9.36	-1.3	17.8	0.00581	-2.1	-0.7	0	0	0
ENSG00000068878	PSME4	proteasome (prosome, macropain) activator subunit 4	nucleus|nucleus|cytosol|cytosol|nuclear speck|spermatoproteasome complex|	protein polyubiquitination|mitotic cell cycle|antigen processing and presentation of peptide antigen via MHC class I|antigen processing and presentation of exogenous peptide antigen via MHC class I, TAP-dependent|DNA repair|regulation of cellular amino acid metabolic process|apoptotic process|cellular response to DNA damage stimulus|DNA damage response, signal transduction by p53 class mediator r…	peptidase activator activity|lysine-acetylated histone binding|	10	-0.7	1.49	10	-1.3	17.7	-1.1	17.8	0.00581	-1.8	-0.6	0	0	0
ENSG00000177192	PUS1	pseudouridylate synthase 1	transcription factor complex|nucleolus|mitochondrion|	tRNA pseudouridine synthesis|positive regulation of transcription from RNA polymerase II promoter|	DNA binding|pseudouridylate synthase activity|pseudouridine synthase activity|ligand-dependent nuclear receptor transcription coactivator activity|poly(A) RNA binding|	10	-1	1.18	10	-2.1	18.7	-2	17.8	0.00581	-3.4	-1	0	0	0
ENSG00000198843	SELT	selenoprotein T	None	selenocysteine incorporation|cell redox homeostasis|	selenium binding|	10	1.6	4.51	10	1.3	13.9	1.3	17.7	0.00596	0.8	2.5	0	0	0
ENSG00000203667	COX20	COX20 cytochrome C oxidase assembly factor	mitochondrion|integral component of membrane|mitochondrial membrane|	None	None	10	-0.7	1.35	10	-1.7	18.7	-1.7	17.7	0.00596	-2.6	-0.7	0	0	0
ENSG00000151093	OXSM	3-oxoacyl-ACP synthase, mitochondrial	mitochondrion|mitochondrion|	acyl-CoA metabolic process|short-chain fatty acid biosynthetic process|medium-chain fatty acid biosynthetic process|	3-oxoacyl-[acyl-carrier-protein] synthase activity|	10	-1.7	2.85	10	-1.2	15.6	-1.2	17.7	0.00596	-2.1	-0.7	0	0	0
ENSG00000211815	TRAV36DV7	T cell receptor alpha variable 36/delta variable 7	None	None	None	10	1.6	10.6	9	1.3	7.94	1.4	17.7	0.00596	0.8	2.6	0	0	0
ENSG00000155906	RMND1	required for meiotic nuclear division 1 homolog (S. cerevisiae)	mitochondrion|	translation|	None	9	-2.6	9.11	8	-1.2	9.77	-1.3	17.7	0.00596	-3.1	-0.7	0	0	0
ENSG00000185085	INTS5	integrator complex subunit 5	membrane|integral component of membrane|integrator complex|	snRNA processing|	protein binding|	10	1.3	6.6	10	-0.9	18.9	-1	17.6	0.00608	-2.2	-0.6	0	0	0
ENSG00000119523	ALG2	ALG2, alpha-1,3/1,6-mannosyltransferase	nucleus|cytoplasm|endoplasmic reticulum membrane|membrane|integral component of membrane|perinuclear region of cytoplasm|	dolichol-linked oligosaccharide biosynthetic process|dolichol-linked oligosaccharide biosynthetic process|protein N-linked glycosylation via asparagine|protein glycosylation in endoplasmic reticulum|post-translational protein modification|cellular protein metabolic process|response to calcium ion|mannosylation|mannosylation|	alpha-1,3-mannosyltransferase activity|GDP-Man:Man1GlcNAc2-PP-Dol alpha-1,3-mannosyltransferase activity|protein binding|glycolipid 6-alpha-mannosyltransferase activity|protein anchor|protein heterodimerization activity|protein N-terminus binding|calcium-dependent protein binding|calcium-dependent protein binding|	9	-2.1	5.87	7	-1.5	12.4	-1.6	17.5	0.00622	-3	-1	0	0	0
ENSG00000267534	S1PR2	sphingosine-1-phosphate receptor 2	plasma membrane|plasma membrane|integral component of membrane|	activation of MAPK activity|sphingosine-1-phosphate signaling pathway|G-protein coupled receptor signaling pathway|positive regulation of cell proliferation|negative regulation of excitatory postsynaptic membrane potential|positive regulation of establishment of endothelial barrier|	G-protein coupled receptor binding|G-protein coupled receptor activity|integrin binding|lipid binding|sphingosine-1-phosphate receptor activity|	10	0.9	5.66	10	0.7	12.5	0.8	17.5	0.00622	0.4	1.3	0	0	0
ENSG00000133983	COX16	COX16 cytochrome c oxidase assembly homolog (S. cerevisiae)	cellular_component|integral component of membrane|mitochondrial membrane|	biological_process|	molecular_function|	10	-1.8	10.4	10	-1	9.31	-1.2	17.5	0.00622	-2.2	-0.6	0	0	0
ENSG00000165527	ARF6	ADP-ribosylation factor 6	ruffle|endosome|endosome|early endosome|Golgi apparatus|plasma membrane|cell cortex|membrane|endocytic vesicle|midbody|filopodium membrane|cleavage furrow|recycling endosome membrane|extracellular vesicular exosome|	liver development|GTP catabolic process|cellular component movement|cell cycle|cell adhesion|small GTPase mediated signal transduction|protein transport|vesicle-mediated transport|positive regulation of actin filament polymerization|cortical actin cytoskeleton organization|ruffle organization|myeloid cell apoptotic process|protein localization to cell surface|regulation of Rac protein signal tran…	GTPase activity|protein binding|GTP binding|thioesterase binding|	10	-1.1	4.52	10	-1.3	13.3	-1.3	17.4	0.00641	-2	-0.7	0	0	0
ENSG00000163170	BOLA3	bolA family member 3	cellular_component|extracellular region|	biological_process|	molecular_function|	10	-1.1	5.01	10	-1.1	12.8	-1.1	17.4	0.00641	-2	-0.6	0	0	0
ENSG00000189043	NDUFA4	NADH dehydrogenase (ubiquinone) 1 alpha subcomplex, 4, 9kDa	mitochondrion|mitochondrial inner membrane|mitochondrial respiratory chain complex I|mitochondrial respiratory chain complex I|mitochondrial respiratory chain complex IV|extracellular vesicular exosome|	mitochondrial electron transport, NADH to ubiquinone|respiratory electron transport chain|cellular metabolic process|small molecule metabolic process|hydrogen ion transmembrane transport|	cytochrome-c oxidase activity|NADH dehydrogenase (ubiquinone) activity|protein complex binding|	8	-0.8	1.78	8	-1.9	17.9	-1.7	17.4	0.00641	-3	-0.8	0	0	0
ENSG00000090263	MRPS33	mitochondrial ribosomal protein S33	mitochondrial small ribosomal subunit|	translation|	structural constituent of ribosome|	10	-1.6	10.5	10	-0.5	8.67	-1.4	17.4	0.00641	-2.1	-0.5	0	0	0
ENSG00000123815	ADCK4	aarF domain containing kinase 4	cytosol|plasma membrane|integral component of membrane|mitochondrial membrane|	protein phosphorylation|	protein serine/threonine kinase activity|	10	-0.8	1.29	10	-2.3	18	-1.3	17.4	0.00641	-3.3	-0.7	0	0	0
ENSG00000008130	NADK	NAD kinase	cytosol|	NADP biosynthetic process|vitamin metabolic process|water-soluble vitamin metabolic process|phosphorylation|NAD metabolic process|small molecule metabolic process|ATP metabolic process|	NAD+ kinase activity|NAD+ kinase activity|ATP binding|metal ion binding|	9	-1.4	7.74	9	-1.3	10	-1.3	17.4	0.00641	-2.4	-0.8	0	0	0
ENSG00000131351	HAUS8	HAUS augmin-like complex, subunit 8	spindle pole|cytoplasm|centrosome|microtubule|HAUS complex|	mitotic nuclear division|spindle assembly|centrosome organization|	molecular_function|	9	-0.9	4.54	8	-1.6	14.5	-1.4	17.2	0.00673	-2.4	-0.8	0	0	0
ENSG00000185344	ATP6V0A2	ATPase, H+ transporting, lysosomal V0 subunit a2	vacuolar proton-transporting V-type ATPase, V0 domain|acrosomal vesicle|cytoplasm|lysosomal membrane|plasma membrane|endosome membrane|integral component of membrane|phagocytic vesicle membrane|	cellular iron ion homeostasis|immune response|insulin receptor signaling pathway|ATP hydrolysis coupled proton transport|transferrin transport|interaction with host|transmembrane transport|phagosome maturation|	protein binding|hydrogen ion transmembrane transporter activity|	10	-1.2	7.25	10	-1.1	10.3	-1.2	17.2	0.00673	-2.1	-0.7	0	0	0
ENSG00000184277	TM2D3	TM2 domain containing 3	integral component of membrane|	None	None	10	-3	10.4	10	-1.1	13.1	-1.2	17.2	0.00673	-3.7	-0.7	0	0	0
ENSG00000172901	AQPEP	laeverin	integral component of membrane|	proteolysis|	metallopeptidase activity|zinc ion binding|	10	3.8	20.1	10	-0.4	0.359	3.8	17.2	0.00673	1.2	7	0	0	0
ENSG00000162144	CYB561A3	cytochrome b561 family, member A3	lysosomal membrane|lysosomal membrane|integral component of membrane|late endosome membrane|	oxidation-reduction process|	oxidoreductase activity|metal ion binding|	8	0.2	0.361	8	1.1	18.7	1	17.2	0.00673	0.6	1.8	0	0	0
ENSG00000181222	POLR2A	polymerase (RNA) II (DNA directed) polypeptide A, 220kDa	nucleus|nucleus|nucleoplasm|DNA-directed RNA polymerase II, core complex|	mRNA splicing, via spliceosome|transcription, RNA-templated|DNA repair|transcription-coupled nucleotide-excision repair|nucleotide-excision repair|regulation of transcription, DNA-templated|transcription from RNA polymerase II promoter|transcription from RNA polymerase II promoter|transcription from RNA polymerase II promoter|transcription initiation from RNA polymerase II promoter|transcription …	RNA polymerase II activity|DNA binding|DNA-directed RNA polymerase activity|RNA-directed RNA polymerase activity|protein binding|protein binding|ubiquitin protein ligase binding|poly(A) RNA binding|metal ion binding|	8	-1.9	9.83	6	-2	7.63	-1.9	17.1	0.0069	-3.4	-1.2	0	0	0
ENSG00000100744	GSKIP	GSK3B interacting protein	cytoplasm|	None	None	10	-1.1	2.66	10	-0.8	14.9	-0.9	17	0.007	-1.6	-0.5	0	0	0
ENSG00000204859	ZBTB48	zinc finger and BTB domain containing 48	nucleus|cytoplasm|	transcription, DNA-templated|regulation of transcription, DNA-templated|	DNA binding|sequence-specific DNA binding transcription factor activity|metal ion binding|	10	1.4	8.58	10	0.9	9.06	1.3	16.9	0.00706	0.6	2.3	0	0	0
ENSG00000132330	SCLY	selenocysteine lyase	cytosol|	cellular amino acid metabolic process|	selenocysteine lyase activity|transferase activity|pyridoxal phosphate binding|	10	1	3.34	10	1	13.9	1	16.9	0.00706	0.5	2	0	0	0
ENSG00000198901	PRC1	protein regulator of cytokinesis 1	spindle pole|nucleus|cytoplasm|spindle|spindle microtubule|plasma membrane|microtubule cytoskeleton|	mitotic spindle elongation|cytokinesis|	protein binding|microtubule binding|protein kinase binding|identical protein binding|	10	1.2	2.88	10	1.3	14.5	1.3	16.9	0.00706	0.7	2.2	0	0	0
ENSG00000140307	GTF2A2	general transcription factor IIA, 2, 12kDa	nucleus|nucleoplasm|transcription factor TFIIA complex|cell junction|	transcription from RNA polymerase II promoter|transcription from RNA polymerase II promoter|transcription initiation from RNA polymerase II promoter|transcription elongation from RNA polymerase II promoter|gene expression|viral process|positive regulation of transcription from RNA polymerase II promoter|positive regulation of sequence-specific DNA binding transcription factor activity|RNA polymer…	RNA polymerase II repressing transcription factor binding|transcription coactivator activity|protein binding|transcription factor binding|TBP-class protein binding|protein homodimerization activity|protein heterodimerization activity|	10	-2	11.4	9	-1.1	8.4	-1.4	16.8	0.00715	-2.7	-0.8	0	0	0
ENSG00000213780	GTF2H4	general transcription factor IIH, polypeptide 4, 52kDa	core TFIIH complex|nucleoplasm|holo TFIIH complex|	nucleotide-excision repair, DNA damage removal|ATP catabolic process|DNA repair|transcription-coupled nucleotide-excision repair|nucleotide-excision repair|regulation of transcription, DNA-templated|transcription from RNA polymerase I promoter|transcription initiation from RNA polymerase I promoter|transcription elongation from RNA polymerase I promoter|termination of RNA polymerase I transcripti…	sequence-specific DNA binding transcription factor activity|ATP-dependent DNA helicase activity|protein kinase activity|protein binding|DNA-dependent ATPase activity|RNA polymerase II carboxy-terminal domain kinase activity|	8	-2.1	1.99	7	-1.3	15.7	-1.3	16.8	0.00715	-2.7	-0.7	0	0	0
ENSG00000051596	THOC3	THO complex 3	transcription export complex|THO complex part of transcription export complex|nuclear speck|	mRNA processing|mRNA export from nucleus|RNA splicing|viral mRNA export from host cell nucleus|	RNA binding|	9	-1.1	4.35	8	-1.8	13.8	-1.8	16.8	0.00715	-2.8	-1.2	0	0	0
ENSG00000147679	UTP23	UTP23, small subunit (SSU) processome component, homolog (yeast)	nucleolus|small-subunit processome|	rRNA processing|	poly(A) RNA binding|	8	-1.7	6.36	9	-1.2	11.4	-1.4	16.8	0.00715	-2.5	-0.8	0	0	0
ENSG00000067955	CBFB	core-binding factor, beta subunit	cellular_component|nucleus|membrane|	osteoblast differentiation|transcription from RNA polymerase II promoter|lymphocyte differentiation|myeloid cell differentiation|positive regulation of transcription from RNA polymerase II promoter|cell maturation|definitive hemopoiesis|	DNA binding|sequence-specific DNA binding transcription factor activity|transcription coactivator activity|protein binding|	10	0.6	0.854	10	0.8	16.4	0.8	16.8	0.00715	0.5	1.7	0	0	0
ENSG00000196235	SUPT5H	suppressor of Ty 5 homolog (S. cerevisiae)	nucleus|nucleoplasm|DSIF complex|	negative regulation of transcription from RNA polymerase II promoter|chromatin remodeling|DNA-templated transcription, elongation|transcription from RNA polymerase II promoter|transcription elongation from RNA polymerase II promoter|transcription elongation from RNA polymerase II promoter|7-methylguanosine mRNA capping|cell cycle|response to organic substance|gene expression|viral process|positiv…	chromatin binding|protein binding|enzyme binding|poly(A) RNA binding|protein heterodimerization activity|	10	-1.4	6.12	9	-1.2	11.1	-1.2	16.8	0.00715	-2.1	-0.6	0	0	0
ENSG00000185414	MRPL30	mitochondrial ribosomal protein L30	mitochondrion|ribosome|	None	None	9	-0.7	0.262	9	-2	18	-1.9	16.8	0.00715	-3.6	-1.3	0	0	0
ENSG00000110987	BCL7A	B-cell CLL/lymphoma 7A	cellular_component|	negative regulation of transcription, DNA-templated|	molecular_function|	10	0.6	1.89	10	1.2	16.2	1	16.7	0.00722	0.5	1.7	0	0	0
ENSG00000163319	MRPS18C	mitochondrial ribosomal protein S18C	mitochondrial small ribosomal subunit|	translation|	structural constituent of ribosome|	10	0.5	1.65	10	1.2	17.2	1.1	16.7	0.00722	0.7	1.8	0	0	0
ENSG00000256500	RP11-73M18.2	N/A	None	None	None	7	-2.1	3.56	7	-1.5	13.9	-1.6	16.7	0.00722	-2.9	-0.7	0	0	0
ENSG00000186660	ZFP91	ZFP91 zinc finger protein	nucleus|	activation of NF-kappaB-inducing kinase activity|protein K63-linked ubiquitination|	nucleic acid binding|ubiquitin-protein transferase activity|ligase activity|metal ion binding|	10	-0.9	3.07	10	-1.4	14.9	-1.2	16.6	0.00729	-2	-0.6	0	0	0
ENSG00000175354	PTPN2	protein tyrosine phosphatase, non-receptor type 2	nucleus|nucleoplasm|endoplasmic reticulum|endoplasmic reticulum-Golgi intermediate compartment|plasma membrane|	negative regulation of cell proliferation|insulin receptor signaling pathway|negative regulation of tumor necrosis factor-mediated signaling pathway|negative regulation of lipid storage|cytokine-mediated signaling pathway|B cell differentiation|T cell differentiation|erythrocyte differentiation|peptidyl-tyrosine dephosphorylation|peptidyl-tyrosine dephosphorylation|negative regulation of epiderma…	protein tyrosine phosphatase activity|protein tyrosine phosphatase activity|integrin binding|protein binding|protein kinase binding|syntaxin binding|receptor tyrosine kinase binding|	9	3.1	19.6	10	0.4	1.79	3	16.5	0.00735	1.5	6.1	0	0	0
ENSG00000103197	TSC2	tuberous sclerosis 2	nucleus|cytoplasm|cytoplasm|Golgi apparatus|cytosol|cytosol|caveola|membrane|dendrite|growth cone|TSC1-TSC2 complex|neuronal cell body|perinuclear region of cytoplasm|	response to hypoxia|neural tube closure|negative regulation of protein kinase activity|protein import into nucleus|endocytosis|acute-phase response|cell cycle arrest|epidermal growth factor receptor signaling pathway|heart development|protein localization|negative regulation of cell proliferation|insulin receptor signaling pathway|fibroblast growth factor receptor signaling pathway|phosphatidylin…	GTPase activator activity|protein binding|phosphatase binding|protein homodimerization activity|protein heterodimerization activity|14-3-3 protein binding|	10	-2.5	6.69	10	-1.5	10.5	-1.5	16.5	0.00735	-3.2	-0.8	0	0	0
ENSG00000182866	LCK	LCK proto-oncogene, Src family tyrosine kinase	pericentriolar material|pericentriolar material|immunological synapse|cytosol|plasma membrane|plasma membrane|endocytic vesicle|membrane raft|membrane raft|extracellular vesicular exosome|	protein phosphorylation|cellular zinc ion homeostasis|cellular zinc ion homeostasis|activation of cysteine-type endopeptidase activity involved in apoptotic process|activation of cysteine-type endopeptidase activity involved in apoptotic process|epidermal growth factor receptor signaling pathway|aging|blood coagulation|fibroblast growth factor receptor signaling pathway|response to mechanical sti…	glycoprotein binding|antigen binding|protein tyrosine kinase activity|protein tyrosine kinase activity|protein tyrosine kinase activity|protein tyrosine kinase activity|non-membrane spanning protein tyrosine kinase activity|protein serine/threonine phosphatase activity|protein serine/threonine phosphatase activity|protein binding|ATP binding|protein C-terminus binding|protein kinase binding|prote…	9	1	3	9	0.7	14.2	0.8	16.5	0.00735	0.4	1.5	0	0	0
ENSG00000223417	TRIM49D1	tripartite motif containing 49D1	None	None	None	8	-2.6	11.8	8	-2	5.8	-2.1	16.5	0.00735	-4.3	-1.5	0	0	0
ENSG00000204435	CSNK2B	casein kinase 2, beta polypeptide	nucleus|cytoplasm|cytosol|plasma membrane|protein kinase CK2 complex|PcG protein complex|extracellular vesicular exosome|	mitotic cell cycle|protein phosphorylation|signal transduction|axon guidance|negative regulation of cell proliferation|positive regulation of pathway-restricted SMAD protein phosphorylation|Wnt signaling pathway|positive regulation of activin receptor signaling pathway|adiponectin-activated signaling pathway|negative regulation of blood vessel endothelial cell migration|cellular protein complex a…	protein serine/threonine kinase activity|receptor binding|protein binding|transcription factor binding|protein kinase regulator activity|protein domain specific binding|identical protein binding|metal ion binding|	9	2.7	18.6	9	-0.6	3.57	2.4	16.5	0.00735	1.2	4.8	0	0	0
ENSG00000124217	MOCS3	molybdenum cofactor synthesis 3	cytosol|cytosol|	tRNA wobble uridine modification|tRNA wobble position uridine thiolation|vitamin metabolic process|water-soluble vitamin metabolic process|Mo-molybdopterin cofactor biosynthetic process|protein adenylylation|enzyme active site formation via L-cysteine persulfide|molybdopterin cofactor biosynthetic process|protein urmylation|tRNA thio-modification|small molecule metabolic process|	thiosulfate sulfurtransferase activity|protein binding|ATP binding|nucleotidyltransferase activity|sulfurtransferase activity|sulfurtransferase activity|URM1 activating enzyme activity|metal ion binding|molybdopterin-synthase sulfurtransferase activity|molybdopterin-synthase adenylyltransferase activity|protein adenylyltransferase activity|	10	-1	1.47	10	-1.5	15.4	-1.5	16.4	0.00742	-2.4	-0.7	0	0	0
ENSG00000079246	XRCC5	X-ray repair complementing defective repair in Chinese hamster cells 5 (double-strand-break rejoining)	nuclear telomere cap complex|nuclear chromosome, telomeric region|nucleus|nucleoplasm|cytosol|membrane|Ku70:Ku80 complex|nonhomologous end joining complex|	telomere maintenance|DNA repair|double-strand break repair|double-strand break repair via nonhomologous end joining|double-strand break repair via nonhomologous end joining|DNA recombination|transcription, DNA-templated|brain development|cell proliferation|viral process|positive regulation of type I interferon production|DNA duplex unwinding|DNA duplex unwinding|response to drug|innate immune res…	DNA binding|damaged DNA binding|double-stranded DNA binding|double-stranded telomeric DNA binding|ATP-dependent DNA helicase activity|protein binding|ATP binding|protein C-terminus binding|ubiquitin protein ligase binding|telomeric DNA binding|transcription regulatory region DNA binding|poly(A) RNA binding|5'-deoxyribose-5-phosphate lyase activity|	10	0.8	3.21	10	0.9	13.6	0.9	16.4	0.00742	0.5	1.7	0	0	0
ENSG00000183684	ALYREF	Aly/REF export factor	transcription export complex|nucleoplasm|cytosol|membrane|nuclear speck|exon-exon junction complex|extracellular vesicular exosome|catalytic step 2 spliceosome|	regulation of DNA recombination|mRNA splicing, via spliceosome|mRNA splicing, via spliceosome|osteoblast differentiation|transcription from RNA polymerase II promoter|termination of RNA polymerase II transcription|mRNA export from nucleus|mRNA export from nucleus|RNA splicing|gene expression|mRNA 3'-end processing|replication fork processing|positive regulation of DNA-templated transcription, elo…	nucleotide binding|protein binding|poly(A) RNA binding|	8	-2.2	5.61	9	-2	11.3	-2	16.3	0.0075	-3.4	-1.1	0	0	0
ENSG00000187778	MCRS1	microspherule protein 1	histone acetyltransferase complex|nucleus|nucleoplasm|cytoplasm|Ino80 complex|MLL1 complex|	DNA repair|DNA recombination|chromatin organization|transcription, DNA-templated|regulation of transcription, DNA-templated|cellular protein modification process|histone H4-K5 acetylation|histone H4-K8 acetylation|histone H4-K16 acetylation|	protein binding|histone acetyltransferase activity (H4-K5 specific)|histone acetyltransferase activity (H4-K8 specific)|histone acetyltransferase activity (H4-K16 specific)|	10	0.4	1.18	10	1.8	18.5	1.8	16.3	0.0075	0.9	3.4	0	0	0
ENSG00000145687	SSBP2	single-stranded DNA binding protein 2	nucleus|cytoplasm|	regulation of transcription, DNA-templated|	single-stranded DNA binding|	10	1.3	7.29	10	0.6	10.7	0.8	16.3	0.0075	0.4	1.5	0	0	0
ENSG00000165389	SPTSSA	serine palmitoyltransferase, small subunit A	integral component of membrane|serine C-palmitoyltransferase complex|	sphingolipid biosynthetic process|	serine C-palmitoyltransferase activity|protein binding|	10	-1.6	3.44	10	-1.1	13.9	-1.3	16.3	0.0075	-2.1	-0.6	0	0	0
ENSG00000173409	ARV1	ARV1 homolog (S. cerevisiae)	integral component of membrane|	sphingolipid metabolic process|bile acid metabolic process|cholesterol transport|regulation of cholesterol metabolic process|	None	10	-0.2	0.0563	10	1.4	17.2	1.3	16.3	0.0075	0.6	2.3	0	0	0
ENSG00000124766	SOX4	SRY (sex determining region Y)-box 4	nucleus|cytoplasm|mitochondrion|	skeletal system development|neural tube formation|pro-B cell differentiation|mitral valve morphogenesis|cardiac ventricle formation|cardiac right ventricle morphogenesis|atrial septum primum morphogenesis|noradrenergic neuron differentiation|transcription, DNA-templated|regulation of transcription, DNA-templated|DNA damage response, signal transduction by p53 class mediator resulting in cell cycl…	transcription regulatory region sequence-specific DNA binding|core promoter sequence-specific DNA binding|nucleic acid binding transcription factor activity|RNA polymerase II core promoter proximal region sequence-specific DNA binding transcription factor activity involved in positive regulation of transcription|RNA polymerase II transcription coactivator activity|sequence-specific DNA binding tr…	10	3	2.17	10	-2.6	17.5	-2.5	16.2	0.00755	-4.4	-1.1	0	0	0
ENSG00000070061	IKBKAP	inhibitor of kappa light polypeptide gene enhancer in B-cells, kinase complex-associated protein	nucleolus|cytoplasm|transcription elongation factor complex|DNA-directed RNA polymerase II, holoenzyme|Elongator holoenzyme complex|	chromatin organization|regulation of transcription from RNA polymerase II promoter|regulation of transcription from RNA polymerase II promoter|transcription elongation from RNA polymerase II promoter|protein complex assembly|protein phosphorylation|immune response|signal transduction|positive regulation of cell migration|regulation of protein kinase activity|regulation of protein kinase activity|	DNA binding|signal transducer activity|protein binding|phosphorylase kinase regulator activity|	10	1.2	1.58	10	1	15.1	1	16.2	0.00755	0.5	1.8	0	0	0
ENSG00000182512	GLRX5	glutaredoxin 5	nucleus|mitochondrion|mitochondrion|	hemopoiesis|cell redox homeostasis|oxidation-reduction process|	electron carrier activity|protein disulfide oxidoreductase activity|metal ion binding|2 iron, 2 sulfur cluster binding|	10	-1.1	4.43	10	-1.4	12.4	-1.4	16.2	0.00755	-2.2	-0.6	0	0	0
ENSG00000115216	NRBP1	nuclear receptor binding protein 1	nucleoplasm|cell cortex|endomembrane system|membrane|lamellipodium|perinuclear region of cytoplasm|	transcription initiation from RNA polymerase II promoter|protein phosphorylation|ER to Golgi vesicle-mediated transport|gene expression|	protein kinase activity|protein binding|ATP binding|protein homodimerization activity|	9	-1.4	3.04	9	-1.7	13.7	-1.6	16.2	0.00755	-2.7	-0.8	0	0	0
ENSG00000100902	PSMA6	proteasome (prosome, macropain) subunit, alpha type, 6	cytoplasmic mRNA processing body|nucleus|nucleoplasm|cytoplasm|cytosol|proteasome core complex|proteasome core complex|polysome|nuclear matrix|proteasome core complex, alpha-subunit complex|proteasome core complex, alpha-subunit complex|myofibril|sarcomere|extracellular vesicular exosome|	G1/S transition of mitotic cell cycle|protein polyubiquitination|mitotic cell cycle|antigen processing and presentation of peptide antigen via MHC class I|antigen processing and presentation of exogenous peptide antigen via MHC class I, TAP-dependent|regulation of cellular amino acid metabolic process|apoptotic process|DNA damage response, signal transduction by p53 class mediator resulting in ce…	RNA binding|RNA binding|endopeptidase activity|threonine-type endopeptidase activity|protein binding|purine ribonucleoside triphosphate binding|NF-kappaB binding|	9	1.1	1.53	10	1.8	15.7	1.5	16.2	0.00755	0.7	2.9	0	0	0
ENSG00000112062	MAPK14	mitogen-activated protein kinase 14	spindle pole|nucleus|nucleoplasm|cytoplasm|mitochondrion|cytosol|extracellular vesicular exosome|	DNA damage checkpoint|activation of MAPK activity|cell morphogenesis|cartilage condensation|angiogenesis|chondrocyte differentiation|toll-like receptor signaling pathway|MyD88-dependent toll-like receptor signaling pathway|MyD88-independent toll-like receptor signaling pathway|glucose metabolic process|transcription, DNA-templated|regulation of transcription from RNA polymerase II promoter|apopto…	protein serine/threonine kinase activity|MAP kinase activity|MAP kinase kinase activity|protein binding|ATP binding|NFAT protein binding|	10	-0.6	1.73	10	-1.5	16.9	-1.5	16.2	0.00755	-2.4	-0.7	0	0	0
ENSG00000174953	DHX36	DEAH (Asp-Glu-Ala-His) box polypeptide 36	chromosome, telomeric region|nucleus|cytosol|	ossification|ATP catabolic process|ATP catabolic process|transcription, DNA-templated|response to virus|RNA secondary structure unwinding|positive regulation of telomere maintenance|positive regulation of type I interferon production|response to exogenous dsRNA|innate immune response|positive regulation of transcription from RNA polymerase II promoter|	core promoter binding|G-quadruplex RNA binding|double-stranded RNA binding|protein binding|ATP binding|ATP-dependent helicase activity|DNA-dependent ATPase activity|histone deacetylase binding|transcription regulatory region DNA binding|poly(A) RNA binding|G-quadruplex DNA binding|	10	2.1	4.31	10	1.2	13.1	1.3	16.1	0.00761	0.7	2.8	0	0	0
ENSG00000044574	HSPA5	heat shock 70kDa protein 5 (glucose-regulated protein, 78kDa)	nucleus|nucleus|endoplasmic reticulum|endoplasmic reticulum|endoplasmic reticulum|endoplasmic reticulum lumen|endoplasmic reticulum membrane|endoplasmic reticulum-Golgi intermediate compartment|COP9 signalosome|cell surface|membrane|integral component of endoplasmic reticulum membrane|midbody|endoplasmic reticulum chaperone complex|melanosome|extracellular vesicular exosome|	platelet degranulation|ATP catabolic process|ER overload response|activation of signaling protein activity involved in unfolded protein response|blood coagulation|cerebellum structural organization|cerebellar Purkinje cell layer development|substantia nigra development|platelet activation|positive regulation of cell migration|ER-associated ubiquitin-dependent protein catabolic process|negative re…	glycoprotein binding|calcium ion binding|protein binding|ATP binding|ATPase activity|enzyme binding|protein domain specific binding|ubiquitin protein ligase binding|ribosome binding|unfolded protein binding|chaperone binding|misfolded protein binding|	3	-0.6	0.174	3	1.9	17.3	1.9	16.1	0.00761	1.3	3.9	0	0	0
ENSG00000119723	COQ6	coenzyme Q6 monooxygenase	mitochondrion|Golgi apparatus|cell projection|	ubiquinone biosynthetic process|ubiquinone biosynthetic process|small molecule metabolic process|oxidation-reduction process|	oxidoreductase activity, acting on paired donors, with incorporation or reduction of molecular oxygen, NAD(P)H as one donor, and incorporation of one atom of oxygen|flavin adenine dinucleotide binding|	10	-1.1	4.92	9	-1	11.6	-1	16	0.00765	-1.7	-0.6	0	0	0
ENSG00000198911	SREBF2	sterol regulatory element binding transcription factor 2	Golgi membrane|nucleus|nucleoplasm|nucleolus|cytoplasm|endoplasmic reticulum|endoplasmic reticulum membrane|cytosol|ER to Golgi transport vesicle membrane|SREBP-SCAP-Insig complex|	negative regulation of transcription from RNA polymerase II promoter|transcription, DNA-templated|lipid metabolic process|cholesterol metabolic process|positive regulation of cholesterol storage|cellular lipid metabolic process|small molecule metabolic process|positive regulation of transcription from RNA polymerase II promoter|response to low-density lipoprotein particle|cellular response to lam…	RNA polymerase II core promoter proximal region sequence-specific DNA binding|sequence-specific DNA binding transcription factor activity|protein binding|protein C-terminus binding|protein dimerization activity|E-box binding|	10	2	8.76	10	0.9	10.5	1	16	0.00765	0.5	2.5	0	0	0
ENSG00000001631	KRIT1	KRIT1, ankyrin repeat containing	extracellular space|cytoplasm|microtubule|plasma membrane|cell-cell junction|	angiogenesis|negative regulation of endothelial cell proliferation|small GTPase mediated signal transduction|negative regulation of endothelial cell migration|negative regulation of angiogenesis|positive regulation of protein binding|cell redox homeostasis|regulation of catalytic activity|regulation of establishment of cell polarity|negative regulation of endothelial cell apoptotic process|	small GTPase regulator activity|protein binding|phosphatidylinositol-4,5-bisphosphate binding|microtubule binding|protein complex binding|	10	-1	3.28	10	-1.2	13.2	-1.2	16	0.00765	-2.1	-0.6	0	0	0
ENSG00000268632	AC073657.1	N/A	None	None	None	6	-1.7	12.7	5	-0.7	6.25	-1.3	16	0.00765	-2.7	-0.6	0	0	0
ENSG00000116679	IVNS1ABP	influenza virus NS1A binding protein	nucleoplasm|transcription factor complex|spliceosomal complex|cytoplasm|cytoskeleton|	transcription from RNA polymerase III promoter|RNA splicing|response to virus|viral process|negative regulation of intrinsic apoptotic signaling pathway|	None	10	1.6	13.4	10	0.8	4.31	1	15.9	0.00768	0.6	2.6	0	0	0
ENSG00000152042	NBPF11	neuroblastoma breakpoint family, member 11	cytoplasm|	None	None	10	1.9	15.6	10	0.6	6.57	1.5	15.9	0.00768	0.5	2.9	0	0	0
ENSG00000146223	RPL7L1	ribosomal protein L7-like 1	ribosome|	None	poly(A) RNA binding|	8	-1.9	12.6	7	-0.9	6.9	-1.6	15.9	0.00768	-2.9	-0.8	0	0	0
ENSG00000112031	MTRF1L	mitochondrial translational release factor 1-like	mitochondrion|	translational termination|	translation release factor activity, codon specific|	9	-2	9.48	9	-1	9.45	-1.2	15.9	0.00768	-2.6	-0.7	0	0	0
ENSG00000144231	POLR2D	polymerase (RNA) II (DNA directed) polypeptide D	cytoplasmic mRNA processing body|nucleus|nucleoplasm|DNA-directed RNA polymerase II, core complex|	nuclear-transcribed mRNA catabolic process, deadenylation-dependent decay|mRNA splicing, via spliceosome|DNA repair|transcription-coupled nucleotide-excision repair|nucleotide-excision repair|transcription from RNA polymerase II promoter|transcription from RNA polymerase II promoter|transcription from RNA polymerase II promoter|transcription initiation from RNA polymerase II promoter|transcriptio…	nucleotide binding|single-stranded DNA binding|single-stranded RNA binding|DNA-directed RNA polymerase activity|translation initiation factor binding|	9	-0.6	1.02	9	-1.3	15.5	-1.3	15.9	0.00768	-2.3	-0.7	0	0	0
ENSG00000138442	WDR12	WD repeat domain 12	nucleoplasm|nucleolus|preribosome, large subunit precursor|PeBoW complex|	maturation of LSU-rRNA from tricistronic rRNA transcript (SSU-rRNA, 5.8S rRNA, LSU-rRNA)|maturation of 5.8S rRNA from tricistronic rRNA transcript (SSU-rRNA, 5.8S rRNA, LSU-rRNA)|Notch signaling pathway|cell proliferation|ribosomal large subunit biogenesis|	protein binding|ribonucleoprotein complex binding|	7	-3.1	4.14	9	-1.3	15.6	-1.3	15.9	0.00768	-3.7	-0.7	0	0	0
ENSG00000143147	GPR161	G protein-coupled receptor 161	integral component of membrane|recycling endosome|ciliary membrane|primary cilium|	G-protein coupled receptor signaling pathway|multicellular organismal development|positive regulation of cAMP biosynthetic process|negative regulation of smoothened signaling pathway involved in dorsal/ventral neural tube patterning|	G-protein coupled receptor activity|	10	-0.3	0.397	10	-1.9	18.4	-1.9	15.9	0.00768	-3.4	-0.8	0	0	0
ENSG00000108278	ZNHIT3	zinc finger, HIT-type containing 3	intracellular|	regulation of transcription, DNA-templated|	metal ion binding|thyroid hormone receptor binding|	10	0	0	8	1.2	18.2	1.1	15.8	0.00773	0.7	1.9	0	0	0
ENSG00000105671	DDX49	DEAD (Asp-Glu-Ala-Asp) box polypeptide 49	None	ATP catabolic process|	ATP binding|ATP-dependent helicase activity|poly(A) RNA binding|	9	-0.8	1.17	9	-1.5	15.6	-1.4	15.8	0.00773	-2.4	-0.8	0	0	0
ENSG00000142937	RPS8	ribosomal protein S8	nucleus|cytoplasm|cytosol|membrane|cytosolic small ribosomal subunit|cytosolic small ribosomal subunit|ribonucleoprotein complex|extracellular vesicular exosome|	nuclear-transcribed mRNA catabolic process, nonsense-mediated decay|maturation of SSU-rRNA from tricistronic rRNA transcript (SSU-rRNA, 5.8S rRNA, LSU-rRNA)|translation|translation|translation|translational initiation|translational elongation|translational termination|SRP-dependent cotranslational protein targeting to membrane|gene expression|viral process|RNA metabolic process|mRNA metabolic pro…	structural constituent of ribosome|poly(A) RNA binding|	9	-1.4	4.5	9	-1.9	12.3	-1.7	15.8	0.00773	-2.8	-0.8	0	0	0
ENSG00000140406	MESDC1	mesoderm development candidate 1	None	None	None	10	-1.1	7.53	10	-0.7	9.51	-0.8	15.8	0.00773	-1.6	-0.4	0	0	0
ENSG00000173726	TOMM20	translocase of outer mitochondrial membrane 20 homolog (yeast)	mitochondrion|mitochondrial outer membrane translocase complex|mitochondrial outer membrane translocase complex|integral component of membrane|	protein targeting to mitochondrion|protein targeting to mitochondrion|cellular protein metabolic process|protein transmembrane transport|	protein binding|P-P-bond-hydrolysis-driven protein transmembrane transporter activity|unfolded protein binding|	10	-2	14.4	10	-0.7	6.85	-1.6	15.8	0.00773	-2.8	-0.6	0	0	0
ENSG00000086504	MRPL28	mitochondrial ribosomal protein L28	nucleus|cytoplasm|mitochondrion|mitochondrial ribosome|mitochondrial ribosome|	translation|	structural constituent of ribosome|protein binding|poly(A) RNA binding|	9	-1.5	6.3	9	-2.3	10.3	-2.2	15.8	0.00773	-3.6	-1.1	0	0	0
ENSG00000090316	MAEA	macrophage erythroblast attacher	nucleus|spindle|actomyosin contractile ring|cytoskeleton|integral component of plasma membrane|nuclear matrix|	cytoskeleton organization|cell cycle|cell adhesion|regulation of mitotic cell cycle|negative regulation of myeloid cell apoptotic process|erythrocyte maturation|enucleate erythrocyte development|cell division|	actin binding|	10	-1	5.7	10	-0.7	10.9	-0.8	15.8	0.00773	-1.6	-0.5	0	0	0
ENSG00000122566	HNRNPA2B1	heterogeneous nuclear ribonucleoprotein A2/B1	nucleus|nucleoplasm|spliceosomal complex|cytoplasm|membrane|ribonucleoprotein complex|catalytic step 2 spliceosome|	mRNA splicing, via spliceosome|mRNA splicing, via spliceosome|mRNA processing|RNA splicing|gene expression|negative regulation of mRNA splicing, via spliceosome|RNA transport|	nucleotide binding|RNA binding|protein binding|single-stranded telomeric DNA binding|poly(A) RNA binding|pre-mRNA intronic binding|	10	-1.3	14.5	10	-0.6	3.87	-1	15.7	0.00783	-1.9	-0.5	0	0	0
ENSG00000177575	CD163	CD163 molecule	extracellular region|plasma membrane|integral component of plasma membrane|endocytic vesicle membrane|	receptor-mediated endocytosis|receptor-mediated endocytosis|acute-phase response|	scavenger receptor activity|protein binding|	10	-1.3	9.17	10	-1.6	7.06	-1.5	15.7	0.00783	-2.6	-0.9	0	0	0
ENSG00000149480	MTA2	metastasis associated 1 family, member 2	histone deacetylase complex|nuclear chromatin|nucleus|transcription factor complex|membrane|NuRD complex|protein complex|	negative regulation of transcription from RNA polymerase II promoter|DNA methylation|chromatin assembly or disassembly|histone deacetylation|ATP-dependent chromatin remodeling|positive regulation of transcription from RNA polymerase II promoter|	RNA polymerase II core promoter proximal region sequence-specific DNA binding|RNA polymerase II distal enhancer sequence-specific DNA binding|transcription factor binding transcription factor activity|RNA polymerase II transcription factor binding|RNA polymerase II repressing transcription factor binding|sequence-specific DNA binding transcription factor activity|histone deacetylase activity|prot…	9	-1.9	5.15	9	-1.9	10.9	-1.9	15.7	0.00783	-3.2	-1	0	0	0
ENSG00000102158	MAGT1	magnesium transporter 1	endoplasmic reticulum membrane|integral component of plasma membrane|oligosaccharyltransferase complex|membrane|	protein N-linked glycosylation|magnesium ion transport|protein N-linked glycosylation via asparagine|post-translational protein modification|cellular protein metabolic process|cognition|	magnesium ion transmembrane transporter activity|	10	1.5	6.29	10	1.3	9.93	1.4	15.7	0.00783	0.6	2.3	0	0	0
ENSG00000131051	RBM39	RNA binding motif protein 39	nucleus|nucleoplasm|microtubule organizing center|microtubule cytoskeleton|nuclear speck|	transcription, DNA-templated|regulation of transcription, DNA-templated|RNA processing|mRNA processing|RNA splicing|	nucleotide binding|protein binding|poly(A) RNA binding|	10	-1.7	6.5	10	-2.1	9.49	-2.1	15.6	0.00788	-3.6	-0.9	0	0	0
ENSG00000139131	YARS2	tyrosyl-tRNA synthetase 2, mitochondrial	mitochondrion|mitochondrion|mitochondrion|mitochondrial matrix|	translation|tRNA aminoacylation for protein translation|gene expression|tRNA aminoacylation|mitochondrial tyrosyl-tRNA aminoacylation|mitochondrial tyrosyl-tRNA aminoacylation|	tRNA binding|tRNA binding|tyrosine-tRNA ligase activity|tyrosine-tRNA ligase activity|tyrosine-tRNA ligase activity|ATP binding|protein homodimerization activity|poly(A) RNA binding|tyrosine binding|	7	-1.7	2.68	7	-1.8	13.2	-1.8	15.6	0.00788	-3.1	-0.7	0	0	0
ENSG00000185359	HGS	hepatocyte growth factor-regulated tyrosine kinase substrate	cytoplasm|endosome|early endosome|cytosol|secretory granule|early endosome membrane|multivesicular body membrane|intracellular membrane-bounded organelle|extracellular vesicular exosome|	intracellular protein transport|signal transduction|epidermal growth factor receptor signaling pathway|negative regulation of cell proliferation|endosome to lysosome transport|endosomal transport|endosomal transport|negative regulation of epidermal growth factor receptor signaling pathway|regulation of protein catabolic process|negative regulation of JAK-STAT cascade|membrane organization|	protein binding|protein domain specific binding|metal ion binding|	9	-2.2	3.27	9	-1.3	13.3	-1.4	15.6	0.00788	-2.9	-0.7	0	0	0
ENSG00000138674	SEC31A	SEC31 homolog A (S. cerevisiae)	Golgi membrane|cytoplasm|endoplasmic reticulum|endoplasmic reticulum membrane|cytosol|ER to Golgi transport vesicle membrane|vesicle coat|COPII vesicle coat|ER to Golgi transport vesicle|intracellular membrane-bounded organelle|perinuclear region of cytoplasm|	antigen processing and presentation of peptide antigen via MHC class I|ER to Golgi vesicle-mediated transport|ER to Golgi vesicle-mediated transport|activation of signaling protein activity involved in unfolded protein response|protein transport|protein N-linked glycosylation via asparagine|antigen processing and presentation of exogenous peptide antigen via MHC class II|endoplasmic reticulum unf…	protein binding|calcium-dependent protein binding|	9	-0.3	0.331	9	-1.5	16.7	-1.4	15.5	0.00791	-2.5	-0.8	0	0	0
ENSG00000171861	RNMTL1	RNA methyltransferase like 1	mitochondrion|	RNA methylation|RNA processing|	RNA methyltransferase activity|poly(A) RNA binding|	10	-1.2	3.41	10	-1.5	12.7	-1.5	15.5	0.00791	-2.3	-0.7	0	0	0
ENSG00000115275	MOGS	mannosyl-oligosaccharide glucosidase	endoplasmic reticulum|endoplasmic reticulum membrane|membrane|integral component of membrane|extracellular vesicular exosome|	protein folding|protein N-linked glycosylation|oligosaccharide metabolic process|protein N-linked glycosylation via asparagine|post-translational protein modification|cellular protein metabolic process|	mannosyl-oligosaccharide glucosidase activity|glucosidase activity|	9	-1.6	8.97	10	-1.1	7.5	-1.4	15.5	0.00791	-2.4	-0.7	0	0	0
ENSG00000132294	EFR3A	EFR3 homolog A (S. cerevisiae)	intracellular|plasma membrane|extracellular vesicular exosome|	None	None	10	-1	5.73	10	-1.2	10.3	-1.1	15.5	0.00791	-1.9	-0.6	0	0	0
ENSG00000179218	CALR	calreticulin	acrosomal vesicle|extracellular region|proteinaceous extracellular matrix|extracellular space|intracellular|nucleus|cytoplasm|endoplasmic reticulum|endoplasmic reticulum|endoplasmic reticulum lumen|endoplasmic reticulum lumen|Golgi apparatus|cytosol|polysome|external side of plasma membrane|cell surface|membrane|sarcoplasmic reticulum lumen|MHC class I peptide loading complex|perinuclear region o…	negative regulation of transcription from RNA polymerase II promoter|antigen processing and presentation of peptide antigen via MHC class I|antigen processing and presentation of exogenous peptide antigen via MHC class I, TAP-dependent|peptide antigen assembly with MHC class I protein complex|regulation of transcription, DNA-templated|protein folding|protein export from nucleus|cellular calcium i…	complement component C1q binding|glycoprotein binding|DNA binding|mRNA binding|integrin binding|iron ion binding|calcium ion binding|calcium ion binding|protein binding|zinc ion binding|carbohydrate binding|ubiquitin protein ligase binding|peptide binding|hormone binding|protein binding involved in protein folding|poly(A) RNA binding|androgen receptor binding|unfolded protein binding|chaperone bi…	10	3.1	3.18	10	-0.9	14.4	-0.9	15.5	0.00791	-1.7	-0.5	0	0	0
ENSG00000100416	TRMU	tRNA 5-methylaminomethyl-2-thiouridylate methyltransferase	mitochondrion|	tRNA processing|	tRNA binding|ATP binding|sulfurtransferase activity|	10	-0.7	2.48	10	-1	13.5	-0.9	15.4	0.00798	-1.7	-0.6	0	0	0
ENSG00000268000	HSA-MIR-150	N/A	None	None	None	9	-2.5	6.28	9	-1.9	9.91	-1.9	15.4	0.00798	-4	-1.2	0	0	0
ENSG00000133112	TPT1	tumor protein, translationally-controlled 1	extracellular space|nucleus|nucleoplasm|cytoplasm|cytoplasm|multivesicular body|tubulin complex|	calcium ion transport|cellular calcium ion homeostasis|response to virus|stem cell maintenance|regulation of apoptotic process|negative regulation of apoptotic process|negative regulation of intrinsic apoptotic signaling pathway in response to DNA damage|negative regulation of ectoderm development|	calcium ion binding|protein binding|transcription factor binding|poly(A) RNA binding|	9	-0.9	2.68	10	0.8	13.8	0.9	15.4	0.00798	0.5	1.8	0	0	0
ENSG00000179918	SEPHS2	selenophosphate synthetase 2	cellular_component|	selenocysteine biosynthetic process|phosphorylation|	selenide, water dikinase activity|ATP binding|	9	1.2	5.34	9	1.2	10.4	1.2	15.4	0.00798	0.6	2.1	0	0	0
ENSG00000163714	U2SURP	U2 snRNP-associated SURP domain containing	nucleus|	RNA processing|	nucleotide binding|protein binding|poly(A) RNA binding|	9	-0.4	0.206	9	0.8	16.2	0.8	15.4	0.00798	0.5	1.8	0	0	0
ENSG00000099942	CRKL	v-crk avian sarcoma virus CT10 oncogene homolog-like	endosome|cytosol|extracellular vesicular exosome|	activation of MAPKK activity|blood vessel development|JNK cascade|Ras protein signal transduction|heart development|organ morphogenesis|anterior/posterior pattern specification|positive regulation of signal transduction|intracellular signal transduction|neurotrophin TRK receptor signaling pathway|thymus development|parathyroid gland development|	signal transducer activity|SH3/SH2 adaptor activity|protein binding|poly(A) RNA binding|	10	-1.4	5.12	10	-2	11.3	-1.8	15.3	0.00804	-2.8	-0.6	0	0	0
ENSG00000114767	RRP9	ribosomal RNA processing 9, small subunit (SSU) processome component, homolog (yeast)	nucleus|nucleolus|small nucleolar ribonucleoprotein complex|small nuclear ribonucleoprotein complex|	rRNA processing|	poly(A) RNA binding|	7	2.2	4.47	8	0.9	12.3	0.9	15.3	0.00804	0.5	2.4	0	0	0
ENSG00000138081	FBXO11	F-box protein 11	ubiquitin ligase complex|nucleus|chromosome|nucleolus|cytoplasm|	cellular protein modification process|ubiquitin-dependent protein catabolic process|sensory perception of sound|protein ubiquitination|protein ubiquitination|peptidyl-arginine N-methylation|	ubiquitin-protein transferase activity|protein binding|zinc ion binding|protein-arginine N-methyltransferase activity|	10	2.2	6.06	9	0.8	13.6	0.9	15.3	0.00804	0.5	2.7	0	0	0
ENSG00000131652	THOC6	THO complex 6 homolog (Drosophila)	transcription export complex|THO complex|THO complex part of transcription export complex|nucleus|nuclear speck|	mRNA processing|mRNA export from nucleus|apoptotic process|central nervous system development|RNA splicing|negative regulation of apoptotic process|viral mRNA export from host cell nucleus|	RNA binding|	10	-1.4	11.1	10	-0.9	5.96	-1.1	15.3	0.00804	-2.2	-0.6	0	0	0
ENSG00000083520	DIS3	DIS3 exosome endoribonuclease and 3'-5' exoribonuclease	nuclear exosome (RNase complex)|exosome (RNase complex)|nucleus|nucleoplasm|cytoplasm|cytosol|membrane|	nuclear-transcribed mRNA catabolic process, deadenylation-dependent decay|rRNA processing|gene expression|RNA metabolic process|mRNA metabolic process|rRNA catabolic process|positive regulation of GTPase activity|exonucleolytic nuclear-transcribed mRNA catabolic process involved in deadenylation-dependent decay|CUT catabolic process|nucleic acid phosphodiester bond hydrolysis|RNA phosphodiester b…	3'-5'-exoribonuclease activity|RNA binding|endonuclease activity|guanyl-nucleotide exchange factor activity|protein binding|	10	-1.4	4.81	10	1	11.9	1	15.3	0.00804	0.5	1.9	0	0	0
ENSG00000183513	COA5	cytochrome c oxidase assembly factor 5	mitochondrion|	None	None	7	-1.5	3.29	8	-1.4	12.4	-1.5	15.3	0.00804	-3	1.9	0	0	0
ENSG00000205629	LCMT1	leucine carboxyl methyltransferase 1	None	cellular protein modification process|protein methylation|C-terminal protein methylation|negative regulation of protein complex assembly|regulation of apoptotic process|regulation of mitotic cell cycle spindle assembly checkpoint|	protein C-terminal carboxyl O-methyltransferase activity|protein binding|S-adenosylmethionine-dependent methyltransferase activity|	9	-2.1	2.97	9	-1.1	13.1	-1.2	15.2	0.00809	-2.4	-0.6	0	0	0
ENSG00000104894	CD37	CD37 molecule	immunological synapse|membrane|integral component of membrane|extracellular vesicular exosome|	positive regulation of immunoglobulin production|regulation of humoral immune response|negative regulation of cell proliferation|negative regulation of myeloid dendritic cell activation|defense response to protozoan|regulation of defense response to virus|	protein binding|	10	-1.4	3.76	10	-2.1	13	-1.9	15.2	0.00809	-3.2	-0.9	0	0	0
ENSG00000213265	TSGA13	testis specific, 13	None	None	None	10	1.9	4.89	10	1.4	11.5	1.5	15.2	0.00809	0.9	2.9	0	0	0
ENSG00000086062	B4GALT1	UDP-Gal:betaGlcNAc beta 1,4- galactosyltransferase, polypeptide 1	Golgi trans cisterna|Golgi membrane|extracellular space|Golgi apparatus|plasma membrane|external side of plasma membrane|membrane|integral component of membrane|basolateral plasma membrane|desmosome|glycocalyx|brush border membrane|Golgi cisterna membrane|extracellular vesicular exosome|	epithelial cell development|acute inflammatory response|carbohydrate metabolic process|lactose biosynthetic process|galactose metabolic process|protein N-linked glycosylation|cell adhesion|Notch signaling pathway|single fertilization|binding of sperm to zona pellucida|penetration of zona pellucida|negative regulation of cell proliferation|oligosaccharide biosynthetic process|oligosaccharide biosy…	beta-N-acetylglucosaminylglycopeptide beta-1,4-galactosyltransferase activity|N-acetyllactosamine synthase activity|lactose synthase activity|cytoskeletal protein binding|galactosyltransferase activity|manganese ion binding|UDP-galactosyltransferase activity|protein homodimerization activity|alpha-tubulin binding|beta-tubulin binding|	10	-1.6	5.89	10	-1.1	10.4	-1.1	15.2	0.00809	-2.1	-0.6	0	0	0
ENSG00000136868	SLC31A1	solute carrier family 31 (copper transporter), member 1	plasma membrane|integral component of plasma membrane|	copper ion transport|copper ion transmembrane transport|transmembrane transport|	copper ion transmembrane transporter activity|	10	-1.2	3.91	9	-2.5	13	-2.3	15.2	0.00809	-3.3	-0.5	0	0	0
ENSG00000112651	MRPL2	mitochondrial ribosomal protein L2	mitochondrion|ribosome|	translation|	structural constituent of ribosome|poly(A) RNA binding|	10	-1.7	12.8	9	-1.6	2.71	-1.6	15.2	0.00809	-2.7	-1	0	0	0
ENSG00000170348	TMED10	transmembrane emp24-like trafficking protein 10 (yeast)	Golgi membrane|Golgi membrane|endoplasmic reticulum|endoplasmic reticulum membrane|endoplasmic reticulum-Golgi intermediate compartment|Golgi apparatus|cis-Golgi network|plasma membrane|integral component of membrane|COPI-coated vesicle|trans-Golgi network transport vesicle|transport vesicle membrane|secretory granule membrane|endoplasmic reticulum-Golgi intermediate compartment membrane|melanoso…	response to acid|kidney development|intracellular protein transport|ER to Golgi vesicle-mediated transport|retrograde vesicle-mediated transport, Golgi to ER|Golgi organization|beta-amyloid formation|cargo loading into vesicle|COPI-coated vesicle budding|response to alkaloid|regulated secretory pathway|vesicle targeting, to, from or within Golgi|COPI coating of Golgi vesicle|COPII vesicle coating…	protein binding|syntaxin binding|protein complex binding|	10	-1.9	9.91	9	-0.8	9.07	-1.1	15.2	0.00809	-2.5	-0.6	0	0	0
ENSG00000129911	KLF16	Kruppel-like factor 16	nucleus|	transcription, DNA-templated|regulation of transcription from RNA polymerase II promoter|dopamine receptor signaling pathway|	DNA binding|sequence-specific DNA binding transcription factor activity|metal ion binding|	10	1.2	3.17	10	1.9	13.2	1.8	15.1	0.00819	0.6	2.9	0	0	0
ENSG00000161888	SPC24	SPC24, NDC80 kinetochore complex component	condensed chromosome kinetochore|nucleus|nucleolus|cytosol|Ndc80 complex|	mitotic cell cycle|mitotic nuclear division|	protein binding|	10	-1.1	5.44	9	-1	10.1	-1	15.1	0.00819	-1.8	-0.5	0	0	0
ENSG00000110906	KCTD10	potassium channel tetramerization domain containing 10	nucleus|cytoplasm|Cul3-RING ubiquitin ligase complex|TCTN-B9D complex|	protein ubiquitination|protein ubiquitination|proteasome-mediated ubiquitin-dependent protein catabolic process|protein homooligomerization|	ubiquitin-protein transferase activity|	10	-0.5	0.649	10	-1.4	15.1	-1.4	15.1	0.00819	-2.3	-0.6	0	0	0
ENSG00000112041	TULP1	tubby like protein 1	photoreceptor outer segment|photoreceptor inner segment|extracellular region|cytoplasm|plasma membrane|cell junction|cell projection|synapse|	retina homeostasis|phagocytosis|visual perception|phototransduction|dendrite development|eye photoreceptor cell development|photoreceptor cell maintenance|positive regulation of phagocytosis|detection of light stimulus involved in visual perception|retina development in camera-type eye|	protein binding|phosphatidylinositol-4,5-bisphosphate binding|G-protein coupled photoreceptor activity|actin filament binding|	10	-1.6	8.26	10	-2.1	7.79	-1.9	15.1	0.00819	-3	-0.7	0	0	0
ENSG00000185697	MYBL1	v-myb avian myeloblastosis viral oncogene homolog-like 1	nucleus|	transcription, DNA-templated|positive regulation of transcription, DNA-templated|positive regulation of transcription from RNA polymerase II promoter|	RNA polymerase II core promoter proximal region sequence-specific DNA binding|RNA polymerase II core promoter proximal region sequence-specific DNA binding transcription factor activity involved in positive regulation of transcription|chromatin binding|	10	-1.6	7.48	10	-0.7	8.15	-1.5	15	0.00824	-2.6	-0.6	0	0	0
ENSG00000182173	TSEN54	TSEN54 tRNA splicing endonuclease subunit	nucleolus|	tRNA splicing, via endonucleolytic cleavage and ligation|mRNA processing|	None	8	-2.3	17.8	7	0.8	2.29	-2.3	15	0.00824	-4.2	-1.3	0	0	0
ENSG00000116459	ATP5F1	ATP synthase, H+ transporting, mitochondrial Fo complex, subunit B1	mitochondrial proton-transporting ATP synthase complex, coupling factor F(o)|nucleus|mitochondrion|mitochondrial inner membrane|mitochondrial proton-transporting ATP synthase complex|mitochondrial matrix|membrane|extracellular vesicular exosome|	ATP catabolic process|ATP synthesis coupled proton transport|substantia nigra development|respiratory electron transport chain|mitochondrial ATP synthesis coupled proton transport|mitochondrial ATP synthesis coupled proton transport|cellular metabolic process|small molecule metabolic process|	protein binding|ATPase activity|transmembrane transporter activity|proton-transporting ATP synthase activity, rotational mechanism|	10	-1.1	5.84	10	-1.2	9.61	-1.2	15	0.00824	-2.1	-0.6	0	0	0
ENSG00000087842	PIR	pirin (iron-binding nuclear protein)	nucleus|cytoplasm|	regulation of transcription, DNA-templated|transcription from RNA polymerase II promoter|monocyte differentiation|oxidation-reduction process|	transcription cofactor activity|protein binding|quercetin 2,3-dioxygenase activity|metal ion binding|	10	1.8	9.25	10	0.6	9.84	0.8	14.9	0.00829	0.4	2.3	0	0	0
ENSG00000120963	ZNF706	zinc finger protein 706	None	None	metal ion binding|	9	-1.4	4.31	10	-1	11.6	-1	14.9	0.00829	-1.9	-0.6	0	0	0
ENSG00000114354	TFG	TRK-fused gene	cytoplasm|extracellular vesicular exosome|	signal transduction|cell death|positive regulation of I-kappaB kinase/NF-kappaB signaling|	signal transducer activity|protein binding|identical protein binding|	10	-2	2.85	10	-1.1	13.1	-1.3	14.9	0.00829	-2.4	-0.6	0	0	0
ENSG00000107185	RGP1	RGP1 retrograde golgi transport homolog (S. cerevisiae)	None	None	None	10	-1.5	6.59	10	-1.3	8.86	-1.4	14.9	0.00829	-2.2	-0.6	0	0	0
ENSG00000137492	PRKRIR	protein-kinase, interferon-inducible double stranded RNA dependent inhibitor, repressor of (P58 repressor)	nucleus|	response to stress|signal transduction|negative regulation of cell proliferation|	DNA binding|metal ion binding|protein dimerization activity|	5	-0.9	3.49	7	-1.7	13	-1.5	14.9	0.00829	-2.7	-0.8	0	0	0
ENSG00000152133	GPATCH11	G patch domain containing 11	None	None	nucleic acid binding|	10	-2.3	3.14	10	-1.7	12.4	-1.7	14.9	0.00829	-3.2	-0.6	0	0	0
ENSG00000125304	TM9SF2	transmembrane 9 superfamily member 2	endosome|integral component of plasma membrane|endosome membrane|extracellular vesicular exosome|	transport|	None	10	-1	3.49	10	-1.2	11.9	-1.1	14.9	0.00829	-2	-0.7	0	0	0
ENSG00000131043	AAR2	AAR2 splicing factor homolog (S. cerevisiae)	None	None	None	10	-0.9	4.46	10	-1.6	11.6	-1.4	14.9	0.00829	-2.4	-0.8	0	0	0
ENSG00000174021	GNG5	guanine nucleotide binding protein (G protein), gamma 5	heterotrimeric G-protein complex|plasma membrane|membrane|extracellular vesicular exosome|	energy reserve metabolic process|GTP catabolic process|signal transduction|G-protein coupled receptor signaling pathway|synaptic transmission|small molecule metabolic process|cellular response to glucagon stimulus|	GTPase activity|signal transducer activity|PDZ domain binding|	6	-1.3	6.51	6	-0.8	9.56	-0.8	14.9	0.00829	-1.9	-0.4	0	0	0
ENSG00000169926	KLF13	Kruppel-like factor 13	nucleus|	transcription from RNA polymerase II promoter|negative regulation of cell proliferation|negative regulation of erythrocyte differentiation|positive regulation of transcription from RNA polymerase II promoter|	DNA binding|protein binding|metal ion binding|	10	0.5	1.26	10	0.8	14.2	0.8	14.8	0.0084	0.4	1.5	0	0	0
ENSG00000014138	POLA2	polymerase (DNA directed), alpha 2, accessory subunit	nucleus|nucleoplasm|alpha DNA polymerase:primase complex|cytoplasm|	protein import into nucleus, translocation|G1/S transition of mitotic cell cycle|mitotic cell cycle|telomere maintenance via recombination|telomere maintenance|DNA replication|DNA replication initiation|DNA replication initiation|DNA strand elongation involved in DNA replication|telomere maintenance via semi-conservative replication|	molecular_function|DNA binding|DNA-directed DNA polymerase activity|protein heterodimerization activity|	10	-2.5	8.67	8	-2.2	6.73	-2.2	14.8	0.0084	-4.4	-1.4	0	0	0
ENSG00000176915	ANKLE2	ankyrin repeat and LEM domain containing 2	endoplasmic reticulum membrane|membrane|integral component of endoplasmic reticulum membrane|	mitotic cell cycle|mitotic nuclear division|mitotic nuclear envelope reassembly|mitotic nuclear envelope reassembly|positive regulation of protein dephosphorylation|negative regulation of phosphorylation|regulation of catalytic activity|	protein binding|protein phosphatase type 2A regulator activity|protein phosphatase 2A binding|	10	-0.6	1.16	10	-1.4	15.7	-1.4	14.8	0.0084	-2.4	-0.8	0	0	0
ENSG00000074842	C19ORF10	chromosome 19 open reading frame 10	endoplasmic reticulum lumen|endoplasmic reticulum-Golgi intermediate compartment|extracellular vesicular exosome|	activation of signaling protein activity involved in unfolded protein response|endoplasmic reticulum unfolded protein response|cellular protein metabolic process|	None	10	-0.7	2.75	10	-0.7	12.3	-0.7	14.7	0.00851	-1.3	-0.4	0	0	0
ENSG00000107815	C10ORF2	chromosome 10 open reading frame 2	mitochondrial nucleoid|	mitochondrial DNA replication|mitochondrial DNA replication|DNA unwinding involved in DNA replication|transcription from mitochondrial promoter|cell death|protein hexamerization|protein homooligomerization|	protease binding|single-stranded DNA binding|ATP binding|5'-3' DNA helicase activity|	10	0.6	1.53	9	-2	13.9	-2	14.7	0.00851	-4	-1.2	0	0	0
ENSG00000132603	NIP7	NIP7, nucleolar pre-rRNA processing protein	nucleolus|	ribosome assembly|	protein binding|poly(A) RNA binding|	7	-1.5	1.87	7	-1.9	13.3	-1.8	14.7	0.00851	-2.8	-0.8	0	0	0
ENSG00000163682	RPL9	ribosomal protein L9	nucleus|nucleolus|cytoplasm|cytosol|ribosome|membrane|cytosolic large ribosomal subunit|	nuclear-transcribed mRNA catabolic process, nonsense-mediated decay|translation|translation|translational initiation|translational elongation|translational termination|SRP-dependent cotranslational protein targeting to membrane|gene expression|viral process|RNA metabolic process|mRNA metabolic process|viral life cycle|viral transcription|cellular protein metabolic process|	RNA binding|structural constituent of ribosome|rRNA binding|	9	-2.5	13.4	7	-0.9	5.28	-2.1	14.7	0.00851	-3.7	-0.6	0	0	0
ENSG00000136206	SPDYE1	speedy/RINGO cell cycle regulator family member E1	None	None	None	10	-2.7	9.44	10	1.3	7.69	-1.5	14.7	0.00851	-3.4	-0.5	0	0	0
ENSG00000138095	LRPPRC	leucine-rich pentatricopeptide repeat containing	condensed nuclear chromosome|nucleus|nuclear inner membrane|nuclear outer membrane|nucleoplasm|mitochondrion|mitochondrion|cytoskeleton|microtubule|membrane|ribonucleoprotein complex|mitochondrial nucleoid|perinuclear region of cytoplasm|	negative regulation of mitochondrial RNA catabolic process|transcription, DNA-templated|regulation of transcription, DNA-templated|mitochondrion transport along microtubule|mRNA transport|regulation of mitochondrial translation|	single-stranded DNA binding|RNA binding|protein binding|microtubule binding|poly(A) RNA binding|beta-tubulin binding|	9	-2	4.2	10	-1.8	11	-1.8	14.7	0.00851	-3.2	-0.9	0	0	0
ENSG00000107949	BCCIP	BRCA2 and CDKN1A interacting protein	nucleus|nuclear cyclin-dependent protein kinase holoenzyme complex|	regulation of cyclin-dependent protein serine/threonine kinase activity|DNA repair|cell cycle|neuroendocrine cell differentiation|	protein binding|kinase regulator activity|poly(A) RNA binding|	10	-0.8	4.82	10	-1.4	12	-1.2	14.7	0.00851	-1.9	-0.7	0	0	0
ENSG00000099994	SUSD2	sushi domain containing 2	integral component of membrane|extracellular vesicular exosome|	receptor-mediated endocytosis|immune response|	scavenger receptor activity|polysaccharide binding|	10	-1.3	5.18	10	-1.4	9.86	-1.5	14.7	0.00851	-2.6	-0.8	0	0	0
ENSG00000132382	MYBBP1A	MYB binding protein (P160) 1a	nucleus|nucleus|nucleolus|nucleolus|cytoplasm|membrane|NLS-dependent protein nuclear import complex|intracellular membrane-bounded organelle|	osteoblast differentiation|DNA-dependent DNA replication|transcription, DNA-templated|regulation of transcription, DNA-templated|nucleocytoplasmic transport|respiratory electron transport chain|cellular response to glucose starvation|negative regulation of transcription, DNA-templated|positive regulation of cell cycle arrest|intrinsic apoptotic signaling pathway by p53 class mediator|	DNA-directed DNA polymerase activity|protein binding|transcription factor binding|sequence-specific DNA binding|poly(A) RNA binding|	9	1.1	3.62	9	1.5	11.8	1.4	14.6	0.00855	0.8	2.5	0	0	0
ENSG00000077809	GTF2I	general transcription factor IIi	nucleus|cytoplasm|membrane|cell projection|neuronal cell body|	regulation of transcription, DNA-templated|transcription from RNA polymerase II promoter|transcription initiation from RNA polymerase II promoter|signal transduction|embryo development|negative regulation of angiogenesis|negative regulation of cytosolic calcium ion concentration|	DNA binding|sequence-specific DNA binding transcription factor activity|protein binding|mitogen-activated protein kinase binding|	10	-1.7	5.43	10	-2	9.84	-1.9	14.6	0.00855	-3.2	-1.1	0	0	0
ENSG00000131153	GINS2	GINS complex subunit 2 (Psf2 homolog)	nucleoplasm|	mitotic cell cycle|DNA strand elongation involved in DNA replication|	protein binding|	8	-1.8	15.7	8	-0.4	3.4	-1.6	14.6	0.00855	-3	-0.6	0	0	0
ENSG00000126261	UBA2	ubiquitin-like modifier activating enzyme 2	nucleoplasm|cytosol|SUMO activating enzyme complex|	protein sumoylation|protein sumoylation|protein sumoylation|SMT3-dependent protein catabolic process|positive regulation of catalytic activity|post-translational protein modification|cellular protein metabolic process|	protein binding|ATP binding|enzyme activator activity|transcription factor binding|ligase activity|SUMO activating enzyme activity|SUMO activating enzyme activity|metal ion binding|protein heterodimerization activity|	7	1.9	15.7	8	0.5	3.01	1.7	14.6	0.00855	0.8	3.4	0	0	0
ENSG00000008324	SS18L2	synovial sarcoma translocation gene on chromosome 18-like 2	None	None	None	9	-0.7	1.11	7	1.7	17.1	1.7	14.5	0.00861	0.6	2.7	0	0	0
ENSG00000077150	NFKB2	nuclear factor of kappa light polypeptide gene enhancer in B-cells 2 (p49/p100)	nucleus|nucleoplasm|cytoplasm|cytosol|Bcl3/NF-kappaB2 complex|	toll-like receptor signaling pathway|follicular dendritic cell differentiation|germinal center formation|MyD88-dependent toll-like receptor signaling pathway|MyD88-independent toll-like receptor signaling pathway|transcription, DNA-templated|regulation of transcription, DNA-templated|extracellular matrix organization|positive regulation of type I interferon production|toll-like receptor 2 signali…	DNA binding|sequence-specific DNA binding transcription factor activity|transcription coactivator activity|protein binding|	10	0.9	2.68	10	0.7	12.2	0.7	14.5	0.00861	0.4	1.4	0	0	0
ENSG00000198356	ASNA1	arsA arsenite transporter, ATP-binding, homolog 1 (bacterial)	nucleus|nucleolus|cytoplasm|endoplasmic reticulum|extracellular vesicular exosome|	ATP catabolic process|transport|inorganic anion transport|protein insertion into ER membrane|	transporter activity|ATP binding|arsenite transmembrane transporter activity|ATPase activity|metal ion binding|	10	-1.4	4.34	9	-2.4	12.6	-2.2	14.5	0.00861	-3.4	-0.6	0	0	0
ENSG00000161981	SNRNP25	small nuclear ribonucleoprotein 25kDa (U11/U12)	nucleus|U12-type spliceosomal complex|cytoplasm|intercellular bridge|	mRNA processing|RNA splicing|	None	10	-1.6	10.3	9	0.8	9.9	-1.1	14.5	0.00861	-4	0.7	0	0	0
ENSG00000264324	RP11-287D1.3	N/A	None	None	None	10	-0.4	0.542	10	-1.5	15.6	-1.5	14.5	0.00861	-2.4	-0.7	0	0	0
ENSG00000164258	NDUFS4	NADH dehydrogenase (ubiquinone) Fe-S protein 4, 18kDa (NADH-coenzyme Q reductase)	mitochondrion|mitochondrial inner membrane|mitochondrial respiratory chain complex I|mitochondrial respiratory chain complex I|	regulation of protein phosphorylation|mitochondrial electron transport, NADH to ubiquinone|brain development|cAMP-mediated signaling|respiratory electron transport chain|mitochondrial respiratory chain complex I assembly|cellular metabolic process|small molecule metabolic process|cellular respiration|positive regulation of fibroblast proliferation|response to cAMP|reactive oxygen species metaboli…	NADH dehydrogenase (ubiquinone) activity|NADH dehydrogenase (ubiquinone) activity|	10	-1.2	5.17	10	-2	11.1	-1.3	14.5	0.00861	-2.7	-0.6	0	0	0
ENSG00000110777	POU2AF1	POU class 2 associating factor 1	nucleus|	regulation of transcription, DNA-templated|transcription from RNA polymerase II promoter|humoral immune response|	DNA binding|transcription cofactor activity|transcription coactivator activity|protein binding|	10	-1.4	7.61	9	-0.8	8.5	-1	14.5	0.00861	-1.9	-0.5	0	0	0
ENSG00000001497	LAS1L	LAS1-like (S. cerevisiae)	nucleus|cytoplasm|microtubule organizing center|membrane|MLL1 complex|	rRNA processing|	poly(A) RNA binding|	9	2.4	8.68	9	-1.5	10	-1.7	14.4	0.00868	-4.1	-0.7	0	0	0
ENSG00000007933	FMO3	flavin containing monooxygenase 3	endoplasmic reticulum membrane|integral component of membrane|intracellular membrane-bounded organelle|	xenobiotic metabolic process|drug metabolic process|small molecule metabolic process|oxidation-reduction process|	N,N-dimethylaniline monooxygenase activity|amino acid binding|trimethylamine monooxygenase activity|flavin adenine dinucleotide binding|NADP binding|	10	-1.6	11.3	10	-1.1	4.46	-1.3	14.4	0.00868	-2.5	-0.8	0	0	0
ENSG00000164091	WDR82	WD repeat domain 82	chromatin|histone methyltransferase complex|Set1C/COMPASS complex|PTW/PP1 phosphatase complex|	histone H3-K4 methylation|	chromatin binding|protein binding|histone methyltransferase activity (H3-K4 specific)|	10	-1.5	0.515	9	0.9	15.8	0.9	14.4	0.00868	0.4	1.9	0	0	0
ENSG00000270999	CH17-132F21.1	N/A	None	None	None	9	-2.1	16.3	7	0.7	4.81	-2.1	14.4	0.00868	-3.6	-1.2	0	0	0
ENSG00000149503	INCENP	inner centromere protein antigens 135/155kDa	chromosome, centromeric region|kinetochore|condensed chromosome kinetochore|lateral element|central element|centromeric heterochromatin|spindle|cytosol|microtubule|chromocenter|midbody|protein complex|	mitotic cell cycle|cytokinesis|chromosome segregation|mitotic nuclear division|	protein binding|	10	-2.1	1.23	9	1.6	16	1.3	14.3	0.0088	0.6	2.5	0	0	0
ENSG00000121621	KIF18A	kinesin family member 18A	ruffle|nucleus|cytoplasm|microtubule organizing center|kinetochore microtubule|cytosol|kinesin complex|caveola|microtubule cytoskeleton|	mitotic cell cycle|ATP catabolic process|microtubule-based movement|microtubule depolymerization|mitotic metaphase plate congression|blood coagulation|metabolic process|protein transport|antigen processing and presentation of exogenous peptide antigen via MHC class II|	actin binding|protein binding|ATP binding|microtubule binding|plus-end-directed microtubule motor activity|ubiquitin binding|microtubule plus-end binding|tubulin-dependent ATPase activity|	10	2.1	6.2	9	2.4	8.96	2.3	14.3	0.0088	1.7	3.9	0	0	0
ENSG00000198171	DDRGK1	DDRGK domain containing 1	endoplasmic reticulum|	None	protein binding|	10	-1.5	5.53	9	-2	9.86	-1.8	14.3	0.0088	-3.1	-1	0	0	0
ENSG00000182185	RAD51B	RAD51 paralog B	nucleus|nucleoplasm|replication fork|Rad51B-Rad51C-Rad51D-XRCC2 complex|	double-strand break repair via homologous recombination|ATP catabolic process|ATP catabolic process|DNA repair|DNA recombination|reciprocal meiotic recombination|blood coagulation|positive regulation of G2/M transition of mitotic cell cycle|	four-way junction DNA binding|DNA binding|double-stranded DNA binding|single-stranded DNA binding|protein binding|ATP binding|DNA-dependent ATPase activity|	9	-0.4	0.637	10	-1.6	15.5	-1.5	14.3	0.0088	-2.7	-1	0	0	0
ENSG00000111596	CNOT2	CCR4-NOT transcription complex, subunit 2	nucleus|cytoplasm|cytosol|membrane|CCR4-NOT complex|	negative regulation of transcription from RNA polymerase II promoter|nuclear-transcribed mRNA catabolic process, deadenylation-dependent decay|nuclear-transcribed mRNA poly(A) tail shortening|trophectodermal cell differentiation|regulation of transcription from RNA polymerase II promoter|transcription from RNA polymerase II promoter|regulation of translation|gene expression|positive regulation of…	RNA polymerase II transcription cofactor activity|RNA polymerase II transcription corepressor binding|poly(A)-specific ribonuclease activity|protein binding|	10	-1	3.96	10	-1	10.6	-1	14.2	0.00887	-1.6	-0.4	0	0	0
ENSG00000157778	PSMG3	proteasome (prosome, macropain) assembly chaperone 3	None	None	None	9	1.5	7.22	9	1.2	7.71	1.2	14.2	0.00887	0.7	2.5	0	0	0
ENSG00000118363	SPCS2	signal peptidase complex subunit 2 homolog (S. cerevisiae)	signal peptidase complex|endoplasmic reticulum membrane|integral component of membrane|	translation|signal peptide processing|proteolysis|SRP-dependent cotranslational protein targeting to membrane|gene expression|cellular protein metabolic process|regulation of insulin secretion|	peptidase activity|	9	1.8	5.48	10	1.7	9.13	1.7	14.2	0.00887	0.6	3.2	0	0	0
ENSG00000120690	ELF1	E74-like factor 1 (ets domain transcription factor)	nucleus|nucleus|	regulation of cytokine production|transcription from RNA polymerase II promoter|cell differentiation|positive regulation of transcription, DNA-templated|positive regulation of transcription, DNA-templated|positive regulation of transcription from RNA polymerase II promoter|negative regulation of T cell receptor signaling pathway|	RNA polymerase II core promoter proximal region sequence-specific DNA binding|sequence-specific DNA binding RNA polymerase II transcription factor activity|RNA polymerase II core promoter proximal region sequence-specific DNA binding transcription factor activity involved in positive regulation of transcription|sequence-specific DNA binding transcription factor activity|protein binding|	10	1.7	3.51	9	1.1	12.2	1.1	14.2	0.00887	0.7	2.6	0	0	0
ENSG00000272897	RP1-309K20.6	N/A	None	None	None	6	-1.5	8.77	7	-0.9	7.11	-1	14.1	0.009	-2.3	-0.6	0	0	0
ENSG00000179468	OR9A2	olfactory receptor, family 9, subfamily A, member 2	plasma membrane|integral component of membrane|	G-protein coupled receptor signaling pathway|detection of chemical stimulus involved in sensory perception of smell|	G-protein coupled receptor activity|olfactory receptor activity|	10	-1.6	9.52	10	0.7	6.36	-1.4	14.1	0.009	-3.7	-0.5	0	0	0
ENSG00000112175	BMP5	bone morphogenetic protein 5	cellular_component|extracellular space|membrane-bounded vesicle|	skeletal system development|ossification|type B pancreatic cell development|pattern specification process|negative regulation of cell proliferation|negative regulation of epithelial to mesenchymal transition|positive regulation of pathway-restricted SMAD protein phosphorylation|negative regulation of steroid biosynthetic process|male genitalia development|negative regulation of aldosterone biosyn…	cytokine activity|growth factor activity|BMP receptor binding|	10	1.2	4.96	10	1.1	9.4	1.1	14	0.00908	0.6	2	0	0	0
ENSG00000103275	UBE2I	ubiquitin-conjugating enzyme E2I	synaptonemal complex|fibrillar center|nucleus|nucleoplasm|cytoplasm|PML body|dendrite|synapse|	negative regulation of transcription from RNA polymerase II promoter|cellular protein modification process|ubiquitin-dependent protein catabolic process|chromosome segregation|mitotic nuclear division|regulation of receptor activity|viral process|protein ubiquitination|protein sumoylation|protein sumoylation|protein sumoylation|positive regulation of intracellular steroid hormone receptor signali…	ubiquitin-protein transferase activity|protein binding|ATP binding|protein C-terminus binding|transcription factor binding|SUMO ligase activity|enzyme binding|HLH domain binding|bHLH transcription factor binding|poly(A) RNA binding|RING-like zinc finger domain binding|	9	-0.9	1.44	9	-1.3	13.5	-1.3	14	0.00908	-2.3	-0.6	0	0	0
ENSG00000197386	HTT	huntingtin	nucleus|cytoplasm|mitochondrion|late endosome|autophagic vacuole|endoplasmic reticulum|Golgi apparatus|cytosol|inclusion body|axon|dendrite|cytoplasmic vesicle membrane|protein complex|	urea cycle|citrulline metabolic process|establishment of mitotic spindle orientation|protein import into nucleus|ER to Golgi vesicle-mediated transport|retrograde vesicle-mediated transport, Golgi to ER|endoplasmic reticulum organization|Golgi organization|dopamine receptor signaling pathway|spermatogenesis|cell aging|grooming behavior|locomotory behavior|axon cargo transport|determination of adu…	p53 binding|protein binding|transcription factor binding|dynactin binding|identical protein binding|dynein intermediate chain binding|beta-tubulin binding|diazepam binding|	10	-3.1	6.84	10	-1.4	10.2	-1.6	14	0.00908	-3.8	-0.6	0	0	0
ENSG00000267987	AL161784.1	N/A	None	None	None	10	-0.9	2.36	10	-1.7	13.2	-1.5	13.9	0.00917	-2.7	-0.9	0	0	0
ENSG00000101126	ADNP	activity-dependent neuroprotector homeobox	extracellular space|nucleus|	transcription, DNA-templated|regulation of transcription, DNA-templated|negative regulation of neuron apoptotic process|	chromatin binding|sequence-specific DNA binding transcription factor activity|protein binding|sequence-specific DNA binding|metal ion binding|	10	-0.7	1.99	10	-0.6	12.2	-0.6	13.9	0.00917	-1.2	-0.3	0	0	0
ENSG00000187555	USP7	ubiquitin specific peptidase 7 (herpes virus-associated)	nucleus|cytosol|PML body|	transcription-coupled nucleotide-excision repair|ubiquitin-dependent protein catabolic process|multicellular organismal development|maintenance of DNA methylation|viral process|protein deubiquitination|protein deubiquitination|negative regulation of NF-kappaB transcription factor activity|regulation of sequence-specific DNA binding transcription factor activity|	p53 binding|cysteine-type endopeptidase activity|ubiquitin thiolesterase activity|ubiquitin thiolesterase activity|ubiquitin-specific protease activity|ubiquitin-specific protease activity|protein binding|protein C-terminus binding|transcription factor binding|ubiquitin protein ligase binding|	10	-2.3	8.54	10	-0.8	9.98	-1.2	13.9	0.00917	-2.9	-0.5	0	0	0
ENSG00000156931	VPS8	vacuolar protein sorting 8 homolog (S. cerevisiae)	None	None	zinc ion binding|	10	2.3	14.4	10	0.6	4.14	2.3	13.9	0.00917	0.7	3.9	0	0	0
ENSG00000108219	TSPAN14	tetraspanin 14	plasma membrane|integral component of membrane|	positive regulation of Notch signaling pathway|protein maturation|establishment of protein localization to plasma membrane|	enzyme binding|	10	-1.2	6.58	10	-0.8	8.44	-1	13.9	0.00917	-1.8	-0.5	0	0	0
ENSG00000176428	VPS37D	vacuolar protein sorting 37 homolog D (S. cerevisiae)	ESCRT I complex|endosome membrane|late endosome membrane|extracellular vesicular exosome|	protein transport|viral process|endosomal transport|viral life cycle|virion assembly|viral protein processing|membrane organization|intracellular transport of virus|	None	10	3.3	4.48	10	2	12	2.9	13.9	0.00917	1.5	5.5	0	0	0
ENSG00000125835	SNRPB	small nuclear ribonucleoprotein polypeptides B and B1	nucleoplasm|spliceosomal complex|U7 snRNP|U1 snRNP|U4 snRNP|U12-type spliceosomal complex|cytosol|cytosol|small nuclear ribonucleoprotein complex|methylosome|SMN-Sm protein complex|extracellular vesicular exosome|catalytic step 2 spliceosome|histone pre-mRNA 3'end processing complex|	spliceosomal snRNP assembly|spliceosomal snRNP assembly|mRNA splicing, via spliceosome|mRNA splicing, via spliceosome|transcription from RNA polymerase II promoter|termination of RNA polymerase II transcription|histone mRNA metabolic process|RNA splicing|gene expression|RNA metabolic process|mRNA 3'-end processing|ncRNA metabolic process|	protein binding|poly(A) RNA binding|histone pre-mRNA DCP binding|	9	2.3	6.84	7	2.4	7.49	2.3	13.9	0.00917	1.9	4	0	0	0
ENSG00000079134	THOC1	THO complex 1	transcription export complex|THO complex|THO complex part of transcription export complex|nucleus|cytoplasm|nuclear matrix|nuclear speck|intercellular bridge|	regulation of DNA recombination|transcription, DNA-templated|RNA processing|mRNA processing|mRNA export from nucleus|mRNA export from nucleus|apoptotic process|signal transduction|RNA splicing|replication fork processing|regulation of DNA-templated transcription, elongation|positive regulation of DNA-templated transcription, elongation|viral mRNA export from host cell nucleus|negative regulation …	DNA binding|RNA binding|protein binding|	10	-1.9	4.48	9	-1.1	10.8	-1.4	13.9	0.00917	-2.5	-0.6	0	0	0
ENSG00000164746	C7ORF57	chromosome 7 open reading frame 57	None	None	None	9	1.4	7.3	9	0.8	7.88	0.8	13.9	0.00917	0.4	2.3	0	0	0
ENSG00000134809	TIMM10	translocase of inner mitochondrial membrane 10 homolog (yeast)	mitochondrion|mitochondrial inner membrane|mitochondrial inner membrane|mitochondrial inner membrane presequence translocase complex|mitochondrial intermembrane space|mitochondrial intermembrane space protein transporter complex|	protein targeting to mitochondrion|sensory perception of sound|cellular protein metabolic process|protein import into mitochondrial inner membrane|protein import into mitochondrial inner membrane|chaperone-mediated protein transport|	transporter activity|protein binding|zinc ion binding|protein homodimerization activity|chaperone binding|	9	-0.9	2.72	9	1.5	16	1.5	13.8	0.00929	0.7	2.7	0	0	0
ENSG00000137806	NDUFAF1	NADH dehydrogenase (ubiquinone) complex I, assembly factor 1	cytoplasm|mitochondrial respiratory chain complex I|	mitochondrial electron transport, NADH to ubiquinone|protein complex assembly|	protein binding|unfolded protein binding|	9	-2.1	1.77	8	-1.4	12.7	-1.5	13.8	0.00929	-3	-0.7	0	0	0
ENSG00000175224	ATG13	autophagy related 13	pre-autophagosomal structure|pre-autophagosomal structure|cytosol|Atg1p signaling complex|ULK1-ATG13-FIP200 complex|	autophagic vacuole assembly|	protein binding|protein kinase binding|	10	-1.3	1.97	10	-0.9	12.3	-0.9	13.8	0.00929	-1.7	-0.5	0	0	0
ENSG00000153207	AHCTF1	AT hook containing transcription factor 1	condensed chromosome kinetochore|chromatin|nucleus|nuclear pore|nucleoplasm|cytosol|nuclear matrix|nuclear pore outer ring|nuclear membrane|extracellular vesicular exosome|	mitotic cell cycle|cytokinesis|regulation of transcription, DNA-templated|protein transport|mRNA transport|nuclear pore complex assembly|	DNA binding|sequence-specific DNA binding transcription factor activity|	8	-0.3	0.211	8	-1.3	14.8	-1.2	13.8	0.00929	-1.9	-0.7	0	0	0
ENSG00000135723	FHOD1	formin homology 2 domain containing 1	stress fiber|nucleus|cytoplasm|membrane|bleb|	positive regulation of transcription from RNA polymerase II promoter|positive regulation of stress fiber assembly|	actin binding|protein binding|identical protein binding|	10	-3.5	6.97	10	1	13	1	13.8	0.00929	0.4	2.4	0	0	0
ENSG00000115446	UNC50	unc-50 homolog (C. elegans)	Golgi membrane|nuclear inner membrane|integral component of membrane|	cell surface receptor signaling pathway|protein transport|	RNA binding|	10	-0.6	1.83	10	-1.4	12.7	-1.4	13.8	0.00929	-2.4	-0.5	0	0	0
ENSG00000147533	GOLGA7	golgin A7	palmitoyltransferase complex|Golgi stack|intrinsic component of Golgi membrane|extracellular vesicular exosome|	peptidyl-L-cysteine S-palmitoylation|Golgi to plasma membrane protein transport|protein stabilization|	protein binding|	10	-0.2	0.143	10	-0.8	14	-0.8	13.8	0.00929	-2.2	-0.5	0	0	0
ENSG00000111237	VPS29	vacuolar protein sorting 29 homolog (S. cerevisiae)	cytoplasm|endosome|cytosol|endosome membrane|intracellular membrane-bounded organelle|extracellular vesicular exosome|	protein transport|dephosphorylation|	phosphoserine phosphatase activity|metal ion binding|	10	-2.3	12.3	8	-0.9	5.24	-1.4	13.8	0.00929	-3.3	-0.6	0	0	0
ENSG00000071626	DAZAP1	DAZ associated protein 1	nucleus|cytoplasm|	maternal placenta development|spermatogenesis|cell proliferation|cell differentiation|	nucleotide binding|RNA binding|RNA stem-loop binding|poly(A) RNA binding|	10	-0.7	3.4	10	-0.7	10.8	-0.7	13.8	0.00929	-1.4	-0.3	0	0	0
ENSG00000151657	KIN	Kin17 DNA and RNA binding protein	nucleus|cytoplasm|nuclear matrix|	DNA replication|DNA repair|DNA recombination|mRNA processing|cellular response to DNA damage stimulus|viral process|	DNA binding|double-stranded DNA binding|RNA binding|metal ion binding|	10	-1.9	2.47	10	-1.4	11.9	-1.4	13.8	0.00929	-2.7	-0.8	0	0	0
ENSG00000169375	SIN3A	SIN3 transcription regulator family member A	kinetochore|nucleus|nucleus|nucleoplasm|transcription factor complex|cytoplasm|Sin3 complex|Sin3 complex|transcriptional repressor complex|intercellular bridge|	negative regulation of transcription from RNA polymerase II promoter|in utero embryonic development|activation of innate immune response|positive regulation of defense response to virus by host|DNA replication|transcription, DNA-templated|protein deacetylation|aging|blood coagulation|response to organonitrogen compound|positive regulation of G2/M transition of mitotic cell cycle|positive regulati…	transcription regulatory region sequence-specific DNA binding|RNA polymerase II activating transcription factor binding|RNA polymerase II repressing transcription factor binding|RNA polymerase II transcription corepressor activity|chromatin binding|sequence-specific DNA binding transcription factor activity|transcription corepressor activity|protein binding|protein complex binding|protein deacety…	10	-1.1	3.8	10	1.5	14.6	1.5	13.8	0.00929	0.8	2.6	0	0	0
ENSG00000070444	MNT	MAX network transcriptional repressor	nucleus|	negative regulation of transcription from RNA polymerase II promoter|transcription from RNA polymerase II promoter|multicellular organismal development|cell aging|negative regulation of cell proliferation|regulation of cell cycle|negative regulation of apoptotic signaling pathway|	RNA polymerase II regulatory region sequence-specific DNA binding|RNA polymerase II transcription regulatory region sequence-specific DNA binding transcription factor activity involved in negative regulation of transcription|chromatin binding|sequence-specific DNA binding transcription factor activity|transcription coactivator activity|transcription corepressor activity|protein dimerization activ…	10	-0.8	1.4	10	-1.2	12.8	-1.2	13.8	0.00929	-2.1	-0.6	0	0	0
ENSG00000068724	TTC7A	tetratricopeptide repeat domain 7A	None	cellular iron ion homeostasis|hemopoiesis|	None	9	-1	3.83	9	-1	10.2	-1	13.7	0.00939	-2	-0.5	0	0	0
ENSG00000131504	DIAPH1	diaphanous-related formin 1	cytoplasm|ruffle membrane|neuron projection|mitotic spindle|	cytoskeleton organization|sensory perception of sound|regulation of cell shape|actin filament polymerization|positive regulation of cell migration|neuron projection development|regulation of microtubule-based process|protein localization to microtubule|regulation of release of sequestered calcium ion into cytosol|cellular response to histamine|	actin binding|receptor binding|protein binding|profilin binding|Rho GTPase binding|identical protein binding|ion channel binding|poly(A) RNA binding|	10	-3.5	9.36	9	-1.9	7.36	-3.2	13.7	0.00939	-5.9	-1.2	0	0	0
ENSG00000145907	G3BP1	GTPase activating protein (SH3 domain) binding protein 1	nucleus|cytoplasm|cytosol|plasma membrane|cytoplasmic stress granule|	ATP catabolic process|transport|Ras protein signal transduction|DNA duplex unwinding|negative regulation of canonical Wnt signaling pathway|nucleic acid phosphodiester bond hydrolysis|	DNA binding|mRNA binding|ATP-dependent DNA helicase activity|ATP-dependent RNA helicase activity|endonuclease activity|protein binding|ATP binding|poly(A) RNA binding|	9	-2.2	4.53	8	-0.9	10.2	-1.1	13.7	0.00939	-2.6	-0.5	0	0	0
ENSG00000092820	EZR	ezrin	ruffle|uropod|extracellular space|nucleolus|cytosol|cytosol|actin filament|plasma membrane|microvillus|focal adhesion|actin cytoskeleton|membrane|basolateral plasma membrane|apical plasma membrane|extrinsic component of membrane|filopodium|T-tubule|cortical cytoskeleton|microvillus membrane|ruffle membrane|cell body|microspike|membrane raft|apical part of cell|cell tip|extracellular vesicular exo…	cytoskeletal anchoring at plasma membrane|leukocyte cell-cell adhesion|axon guidance|regulation of cell shape|positive regulation of gene expression|membrane to membrane docking|receptor internalization|establishment or maintenance of apical/basal cell polarity|filopodium assembly|actin filament bundle assembly|establishment of endothelial barrier|	protein binding|protein domain specific binding|poly(A) RNA binding|cell adhesion molecule binding|actin filament binding|	10	1	3.25	10	0.6	11.1	0.6	13.7	0.00939	0.3	1.3	0	0	0
ENSG00000196455	PIK3R4	phosphoinositide-3-kinase, regulatory subunit 4	late endosome|cytosol|axoneme|membrane|	toll-like receptor signaling pathway|protein phosphorylation|phospholipid metabolic process|phosphatidylinositol biosynthetic process|insulin receptor signaling pathway|toll-like receptor 9 signaling pathway|small molecule metabolic process|innate immune response|	protein kinase activity|protein serine/threonine kinase activity|protein binding|ATP binding|	10	0.5	0.961	10	-1.2	13.8	-1.2	13.7	0.00939	-1.9	-0.8	0	0	0
ENSG00000127616	SMARCA4	SWI/SNF related, matrix associated, actin dependent regulator of chromatin, subfamily a, member 4	nuclear chromatin|heterochromatin|extracellular space|nucleus|nuclear euchromatin|perichromatin fibrils|nucleolus|membrane|SWI/SNF complex|protein complex|npBAF complex|npBAF complex|nBAF complex|	negative regulation of transcription from RNA polymerase II promoter|cell morphogenesis|vasculogenesis|blastocyst growth|blastocyst hatching|liver development|neural retina development|ATP catabolic process|nucleosome disassembly|chromatin remodeling|chromatin remodeling|methylation-dependent chromatin silencing|transcription, DNA-templated|regulation of transcription from RNA polymerase II promo…	RNA polymerase II core promoter proximal region sequence-specific DNA binding|RNA polymerase II distal enhancer sequence-specific DNA binding|RNA polymerase II transcription coactivator activity|p53 binding|transcription coactivator activity|transcription coactivator activity|transcription corepressor activity|helicase activity|protein binding|ATP binding|DNA-dependent ATPase activity|Tat protein…	10	0.7	1.23	9	2.2	15.4	2.1	13.7	0.00939	0.7	3.4	0	0	0
ENSG00000177646	ACAD9	acyl-CoA dehydrogenase family, member 9	nucleus|mitochondrion|dendrite|	oxidation-reduction process|	acyl-CoA dehydrogenase activity|flavin adenine dinucleotide binding|	10	-2.6	7.7	10	-1.4	6.79	-1.5	13.6	0.00958	-3.2	-0.5	0	0	0
ENSG00000013375	PGM3	phosphoglucomutase 3	cellular_component|cytosol|cytosol|	glucosamine metabolic process|UDP-N-acetylglucosamine biosynthetic process|UDP-N-acetylglucosamine biosynthetic process|UDP-N-acetylglucosamine biosynthetic process|dolichol-linked oligosaccharide biosynthetic process|spermatogenesis|embryo development|protein N-linked glycosylation via asparagine|glucose 1-phosphate metabolic process|hemopoiesis|post-translational protein modification|cellular p…	magnesium ion binding|phosphoacetylglucosamine mutase activity|phosphoglucomutase activity|	10	-1.1	4.86	10	1.5	15.5	1.4	13.6	0.00958	-0.8	3	0	0	0
ENSG00000217128	FNIP1	folliculin interacting protein 1	cytoplasm|	negative regulation of transcription from RNA polymerase II promoter|regulation of protein phosphorylation|positive regulation of protein phosphorylation|immature B cell differentiation|positive regulation of B cell apoptotic process|cellular response to starvation|TOR signaling|negative regulation of TOR signaling|positive regulation of peptidyl-serine phosphorylation|negative regulation of cyst…	guanyl-nucleotide exchange factor activity|protein binding|	10	-1.6	7.32	9	-0.7	9.26	-0.8	13.6	0.00958	-2	-0.4	0	0	0
ENSG00000143486	EIF2D	eukaryotic translation initiation factor 2D	nucleus|cytoplasm|cytosolic small ribosomal subunit|	formation of translation preinitiation complex|IRES-dependent translational initiation|intracellular protein transport|ribosome disassembly|	translation initiation factor activity|receptor activity|	10	1.2	6.8	10	1.9	9.03	1.5	13.6	0.00958	0.6	2.8	0	0	0
ENSG00000166747	AP1G1	adaptor-related protein complex 1, gamma 1 subunit	Golgi membrane|cytoplasm|lysosomal membrane|Golgi apparatus|cytosol|membrane|AP-type membrane coat adaptor complex|clathrin adaptor complex|clathrin-coated vesicle|cytoplasmic vesicle membrane|clathrin-coated vesicle membrane|trans-Golgi network membrane|intracellular membrane-bounded organelle|perinuclear region of cytoplasm|recycling endosome|	intracellular protein transport|post-Golgi vesicle-mediated transport|viral process|antigen processing and presentation of exogenous peptide antigen via MHC class II|melanosome organization|endosome to melanosome transport|positive regulation of natural killer cell degranulation|positive regulation of natural killer cell mediated cytotoxicity|regulation of defense response to virus by virus|membr…	transporter activity|protein binding|protein transporter activity|Rab GTPase binding|kinesin binding|GTP-dependent protein binding|	10	-1.2	6.75	10	-1	7.45	-1	13.6	0.00958	-1.8	-0.5	0	0	0
ENSG00000248333	CDK11B	cyclin-dependent kinase 11B	nucleus|cytoplasm|	regulation of cell growth|regulation of transcription, DNA-templated|protein phosphorylation|apoptotic process|mitotic nuclear division|cell proliferation|regulation of mRNA processing|regulation of cell cycle|	protein kinase activity|protein serine/threonine kinase activity|cyclin-dependent protein serine/threonine kinase activity|protein binding|ATP binding|poly(A) RNA binding|	10	-1.3	3.6	10	-0.9	10.8	-1	13.6	0.00958	-1.8	-0.5	0	0	0
ENSG00000119314	PTBP3	polypyrimidine tract binding protein 3	nucleus|	mRNA processing|RNA splicing|anatomical structure morphogenesis|negative regulation of RNA splicing|erythrocyte maturation|regulation of cell differentiation|	nucleotide binding|RNA binding|poly(A) RNA binding|	10	1.6	10.6	10	0.7	4.74	1.2	13.6	0.00958	0.6	2.2	0	0	0
ENSG00000100632	ERH	enhancer of rudimentary homolog (Drosophila)	midbody|	nucleobase-containing compound metabolic process|pyrimidine nucleoside metabolic process|cell cycle|	poly(A) RNA binding|	5	-2.4	8.61	5	-1.1	8.01	-1.6	13.6	0.00958	-3.9	-0.7	0	0	0
ENSG00000100347	SAMM50	SAMM50 sorting and assembly machinery component	mitochondrial sorting and assembly machinery complex|mitochondrion|mitochondrial outer membrane|mitochondrial inner membrane|integral component of membrane|extracellular vesicular exosome|	protein targeting to mitochondrion|cellular protein metabolic process|protein import into mitochondrial outer membrane|	protein binding|	9	3.7	17.1	9	-1.4	1.36	3.7	13.5	0.0097	2.2	7	0	0	0
ENSG00000125995	ROMO1	reactive oxygen species modulator 1	mitochondrion|mitochondrial inner membrane|integral component of membrane|	replicative cell aging|positive regulation of cell proliferation|cellular response to reactive oxygen species|defense response to bacterium|positive regulation of reactive oxygen species metabolic process|	molecular_function|	10	-2.5	5.64	10	1.4	14.6	1.4	13.5	0.0097	0.7	2.7	0	0	0
ENSG00000089041	P2RX7	purinergic receptor P2X, ligand-gated ion channel, 7	integral component of nuclear inner membrane|cytoplasm|plasma membrane|plasma membrane|integral component of plasma membrane|membrane|bleb|	regulation of sodium ion transport|cation transport|cell surface receptor signaling pathway|positive regulation of calcium ion transport into cytosol|sensory perception of pain|positive regulation of bone mineralization|bleb assembly|response to ATP|ion transmembrane transport|purinergic nucleotide receptor signaling pathway|purinergic nucleotide receptor signaling pathway|nucleotide-binding doma…	lipopolysaccharide binding|purinergic nucleotide receptor activity|extracellular ATP-gated cation channel activity|receptor binding|ATP binding|protein homodimerization activity|	10	-3.6	13.3	10	-1.7	2.88	-3.4	13.5	0.0097	-6.7	-1.1	0	0	0
ENSG00000143376	SNX27	sorting nexin family member 27	immunological synapse|nucleus|cytoplasm|early endosome|cytosol|retromer complex|early endosome membrane|WASH complex|	establishment of natural killer cell polarity|intracellular protein transport|signal transduction|endosome to lysosome transport|endosomal transport|retrograde transport, endosome to plasma membrane|	protein binding|phosphatidylinositol-3-phosphate binding|	10	0.5	0.773	10	1	13.5	0.9	13.5	0.0097	0.5	1.6	0	0	0
ENSG00000167005	NUDT21	nudix (nucleoside diphosphate linked moiety X)-type motif 21	nucleus|nucleoplasm|centrosome|mRNA cleavage factor complex|paraspeckles|	mRNA splicing, via spliceosome|transcription from RNA polymerase II promoter|termination of RNA polymerase II transcription|mRNA polyadenylation|mRNA processing|RNA splicing|gene expression|mRNA 3'-end processing|protein tetramerization|	RNA binding|mRNA binding|protein binding|hydrolase activity|AU-rich element binding|protein homodimerization activity|histone deacetylase binding|poly(A) RNA binding|	9	-1	4.81	10	-1	9.06	-1	13.5	0.0097	-2	2.4	0	0	0
ENSG00000100162	CENPM	centromere protein M	condensed chromosome kinetochore|nucleus|cytosol|	mitotic cell cycle|	None	10	2.8	4.45	10	1.1	11.8	1.4	13.5	0.0097	0.5	3.4	0	0	0
ENSG00000096080	MRPS18A	mitochondrial ribosomal protein S18A	mitochondrial small ribosomal subunit|	translation|	structural constituent of ribosome|	10	2.4	15.5	10	-0.6	1.33	2.4	13.4	0.00981	0.7	3.9	0	0	0
ENSG00000145626	UGT3A1	UDP glycosyltransferase 3 family, polypeptide A1	integral component of membrane|UDP-N-acetylglucosamine transferase complex|	metabolic process|	UDP-glycosyltransferase activity|glucuronosyltransferase activity|	10	-1.4	5.63	10	-1.8	8.2	-1.7	13.4	0.00981	-2.8	-0.5	0	0	0
ENSG00000111602	TIMELESS	timeless circadian clock	nuclear chromatin|nucleus|nucleus|	negative regulation of transcription from RNA polymerase II promoter|morphogenesis of an epithelium|transcription, DNA-templated|cellular response to DNA damage stimulus|mitotic nuclear division|circadian rhythm|detection of abiotic stimulus|response to abiotic stimulus|embryo development|lung development|regulation of circadian rhythm|cell cycle phase transition|negative regulation of transcript…	protein binding|protein homodimerization activity|protein heterodimerization activity|	10	-1.6	6.14	10	-1.1	8.44	-1.4	13.4	0.00981	-2.4	-0.7	0	0	0
ENSG00000091483	FH	fumarate hydratase	cytoplasm|mitochondrion|mitochondrial matrix|tricarboxylic acid cycle enzyme complex|extracellular vesicular exosome|	tricarboxylic acid cycle|tricarboxylic acid cycle|fumarate metabolic process|cellular metabolic process|small molecule metabolic process|homeostasis of number of cells within a tissue|	fumarate hydratase activity|	9	-1.1	2.36	8	-1.3	11.4	-1.3	13.4	0.00981	-2.7	-0.7	0	0	0
ENSG00000127337	YEATS4	YEATS domain containing 4	nucleoplasm|nucleoplasm|nuclear matrix|NuA4 histone acetyltransferase complex|	chromatin organization|transcription, DNA-templated|mitotic nuclear division|regulation of growth|histone H4 acetylation|histone H2A acetylation|positive regulation of transcription, DNA-templated|	DNA binding|sequence-specific DNA binding transcription factor activity|structural constituent of cytoskeleton|protein binding|protein C-terminus binding|	10	-1.9	16.1	10	-0.1	0.109	-1.8	13.3	0.00998	-3.4	-1.1	0	0	0
ENSG00000100647	KIAA0247	KIAA0247	cellular_component|integral component of membrane|	biological_process|	molecular_function|	10	-0.4	1	9	1.6	14.8	1.5	13.3	0.00998	0.9	2.8	0	0	0
ENSG00000182481	KPNA2	karyopherin alpha 2 (RAG cohort 1, importin alpha 1)	nucleus|nucleoplasm|cytoplasm|cytosol|membrane|	regulation of DNA recombination|mitotic G2 phase|DNA metabolic process|NLS-bearing protein import into nucleus|viral process|cytokine-mediated signaling pathway|	protein binding|nuclear localization sequence binding|protein transporter activity|histone deacetylase binding|poly(A) RNA binding|	10	-1.3	5.65	9	-1.1	8.1	-1.1	13.3	0.00998	-2.1	-0.5	0	0	0
ENSG00000120948	TARDBP	TAR DNA binding protein	nucleus|	regulation of transcription, DNA-templated|transcription from RNA polymerase II promoter|mRNA processing|cell death|RNA splicing|negative regulation by host of viral transcription|3'-UTR-mediated mRNA stabilization|	nucleotide binding|double-stranded DNA binding|sequence-specific DNA binding transcription factor activity|RNA binding|mRNA 3'-UTR binding|protein binding|identical protein binding|poly(A) RNA binding|	9	-1.5	5.91	6	-1.3	7.75	-1.4	13.2	0.0101	-2.5	-0.8	0	0	0
ENSG00000103769	RAB11A	RAB11A, member RAS oncogene family	mitochondrion|trans-Golgi network|plasma membrane|transport vesicle|axon|cytoplasmic vesicle membrane|phagocytic vesicle membrane|cleavage furrow|protein complex|phagocytic vesicle|perinuclear region of cytoplasm|recycling endosome|recycling endosome membrane|extracellular vesicular exosome|	cytokinesis|GTP catabolic process|water transport|small GTPase mediated signal transduction|protein transport|vesicle-mediated transport|neuron projection development|melanosome transport|positive regulation of axon extension|regulation of long-term neuronal synaptic plasticity|plasma membrane to endosome transport|regulation of protein transport|transmembrane transport|protein localization to pl…	GTPase activity|protein binding|GTP binding|syntaxin binding|	10	-2.3	2.52	10	-0.9	12.2	-0.9	13.2	0.0101	-2.2	-0.3	0	0	0
ENSG00000185624	P4HB	prolyl 4-hydroxylase, beta polypeptide	extracellular region|endoplasmic reticulum|endoplasmic reticulum lumen|endoplasmic reticulum-Golgi intermediate compartment|plasma membrane|procollagen-proline 4-dioxygenase complex|melanosome|extracellular vesicular exosome|	protein folding|peptidyl-proline hydroxylation to 4-hydroxy-L-proline|extracellular matrix organization|response to endoplasmic reticulum stress|lipoprotein metabolic process|small molecule metabolic process|cell redox homeostasis|cellular response to hypoxia|regulation of oxidative stress-induced intrinsic apoptotic signaling pathway|	protein disulfide isomerase activity|procollagen-proline 4-dioxygenase activity|protein binding|poly(A) RNA binding|protein heterodimerization activity|	10	2	5.36	10	1	10.8	1.1	13.2	0.0101	0.5	2.7	0	0	0
ENSG00000155622	XAGE2B	N/A	None	None	None	9	2.2	3.7	9	1	11.3	1	13.1	0.0102	0.6	2.7	0	0	0
ENSG00000158941	CCAR2	cell cycle and apoptosis regulator 2	nuclear chromatin|nucleus|spliceosomal complex|cytoplasm|mitochondrial matrix|DBIRD complex|	mRNA processing|cellular response to DNA damage stimulus|cell cycle|RNA splicing|response to UV|regulation of DNA-templated transcription, elongation|positive regulation of apoptotic process|negative regulation of catalytic activity|negative regulation of catalytic activity|negative regulation of catalytic activity|mitochondrial fragmentation involved in apoptotic process|negative regulation of i…	RNA polymerase II core binding|enzyme inhibitor activity|enzyme inhibitor activity|protein binding|enzyme binding|poly(A) RNA binding|	10	-0.9	5.63	10	-1.1	8.04	-1	13.1	0.0102	-1.6	-0.5	0	0	0
ENSG00000105438	KDELR1	KDEL (Lys-Asp-Glu-Leu) endoplasmic reticulum protein retention receptor 1	endoplasmic reticulum membrane|endoplasmic reticulum-Golgi intermediate compartment|cis-Golgi network|membrane|integral component of membrane|COPI-coated vesicle membrane|endoplasmic reticulum-Golgi intermediate compartment membrane|	protein retention in ER lumen|intracellular protein transport|vesicle-mediated transport|	KDEL sequence binding|	10	1.8	16.3	10	0.2	0.654	1.8	13.1	0.0102	0.8	3.2	0	0	0
ENSG00000116649	SRM	spermidine synthase	cytosol|	polyamine metabolic process|spermidine biosynthetic process|spermidine biosynthetic process|cellular nitrogen compound metabolic process|small molecule metabolic process|	spermidine synthase activity|protein homodimerization activity|	9	0.4	1.02	9	1.6	14.4	1.6	13	0.0103	1	3	0	0	0
ENSG00000204463	BAG6	BCL2-associated athanogene 6	nucleus|cytosol|BAT3 complex|	kidney development|immune system process|ubiquitin-dependent protein catabolic process|transport|synaptonemal complex assembly|spermatogenesis|brain development|embryo development|chromatin modification|internal peptidyl-lysine acetylation|cell differentiation|lung development|negative regulation of proteasomal ubiquitin-dependent protein catabolic process|regulation of cell proliferation|intrins…	protein binding|Hsp70 protein binding|polyubiquitin binding|ribosome binding|proteasome binding|	10	-1	2.95	10	-0.7	10.7	-0.8	13	0.0103	-1.5	-0.4	0	0	0
ENSG00000134389	CFHR5	complement factor H-related 5	extracellular region|	complement activation, alternative pathway|	None	10	2.5	9	10	1.2	7.95	2.1	13	0.0103	0.8	4	0	0	0
ENSG00000166483	WEE1	WEE1 G2 checkpoint kinase	nucleus|nucleoplasm|cytoplasm|	G1/S transition of mitotic cell cycle|G2/M transition of mitotic cell cycle|microtubule cytoskeleton organization|mitotic cell cycle|mitotic nuclear division|blood coagulation|peptidyl-tyrosine phosphorylation|establishment of cell polarity|neuron projection morphogenesis|regulation of cell cycle|	magnesium ion binding|protein serine/threonine kinase activity|protein tyrosine kinase activity|non-membrane spanning protein tyrosine kinase activity|protein binding|ATP binding|	10	-1.9	8.2	10	-0.6	7.57	-1.3	13	0.0103	-2.6	-0.4	0	0	0
ENSG00000165388	ZNF488	zinc finger protein 488	nucleus|	regulation of transcription from RNA polymerase II promoter|transcription from RNA polymerase II promoter|oligodendrocyte development|negative regulation of transcription, DNA-templated|positive regulation of oligodendrocyte differentiation|	sequence-specific DNA binding RNA polymerase II transcription factor activity|DNA binding|protein binding|metal ion binding|	10	1.2	4.93	10	1.1	8.53	1.1	13	0.0103	0.5	2.3	0	0	0
ENSG00000180483	DEFB119	defensin, beta 119	extracellular region|	defense response to bacterium|	None	10	-1.3	1.93	10	-2	12.3	-1.8	13	0.0103	-3.3	-0.8	0	0	0
ENSG00000076043	REXO2	RNA exonuclease 2	nucleus|nucleolus|mitochondrion|mitochondrial intermembrane space|mitochondrial matrix|focal adhesion|	nucleobase-containing compound metabolic process|nucleotide metabolic process|nucleic acid phosphodiester bond hydrolysis|nucleic acid phosphodiester bond hydrolysis|	nucleic acid binding|3'-5' exonuclease activity|	10	-1.2	4.73	10	-0.9	8.91	-0.9	13	0.0103	-1.7	-0.4	0	0	0
ENSG00000268643	AC006486.9	N/A	None	None	None	5	-1.9	8.28	5	-1.6	5.41	-1.6	13	0.0103	-3.4	-0.9	0	0	0
ENSG00000087157	PGS1	phosphatidylglycerophosphate synthase 1	mitochondrion|mitochondrial inner membrane|endoplasmic reticulum|	phospholipid metabolic process|phosphatidylglycerol biosynthetic process|phosphatidylglycerol biosynthetic process|cardiolipin biosynthetic process|small molecule metabolic process|diacylglycerol metabolic process|glycerophospholipid biosynthetic process|	calcium ion binding|ATP binding|CDP-diacylglycerol-glycerol-3-phosphate 3-phosphatidyltransferase activity|	10	0.3	0.541	10	1.6	14.1	1.4	13	0.0103	0.7	2.6	0	0	0
ENSG00000177565	TBL1XR1	transducin (beta)-like 1 X-linked receptor 1	histone deacetylase complex|nucleus|nucleoplasm|spindle microtubule|transcriptional repressor complex|	negative regulation of transcription from RNA polymerase II promoter|transcription, DNA-templated|Notch signaling pathway|chromatin modification|proteasome-mediated ubiquitin-dependent protein catabolic process|cellular lipid metabolic process|small molecule metabolic process|positive regulation of transcription, DNA-templated|positive regulation of transcription from RNA polymerase II promoter|c…	transcription corepressor activity|transcription corepressor activity|protein binding|beta-catenin binding|histone binding|transcription regulatory region DNA binding|transcription regulatory region DNA binding|protein N-terminus binding|	9	-2	0.466	9	1.1	14.5	1.1	12.9	0.0105	0.6	1.9	0	0	0
ENSG00000102898	NUTF2	nuclear transport factor 2	nuclear pore|cytosol|extracellular vesicular exosome|	protein export from nucleus|	transporter activity|protein binding|	9	-2.3	6.21	8	-0.8	8.09	-0.9	12.9	0.0105	-2.6	-0.4	0	0	0
ENSG00000170160	CCDC144A	coiled-coil domain containing 144A	None	None	None	10	-1.7	4.61	10	-2.5	9.93	-2.4	12.9	0.0105	-4.1	-0.9	0	0	0
ENSG00000189308	LIN54	lin-54 DREAM MuvB core complex component	nucleoplasm|	G2/M transition of mitotic cell cycle|mitotic cell cycle|transcription, DNA-templated|regulation of transcription, DNA-templated|regulation of cell cycle|	DNA binding|protein binding|	10	1	1.18	10	-1.8	15.8	-1.8	12.9	0.0105	-3	-0.6	0	0	0
ENSG00000115392	FANCL	Fanconi anemia, complementation group L	nuclear envelope|nucleoplasm|cytoplasm|Fanconi anaemia nuclear complex|	DNA repair|DNA repair|protein monoubiquitination|cellular response to DNA damage stimulus|gamete generation|regulation of cell proliferation|	ubiquitin-protein transferase activity|ubiquitin-protein transferase activity|ubiquitin-protein transferase activity|zinc ion binding|ligase activity|ubiquitin protein ligase binding|	10	-1	2.62	10	-1	10.6	-1	12.9	0.0105	-1.9	-0.5	0	0	0
ENSG00000117697	NSL1	NSL1, MIS12 kinetochore complex component	MIS12/MIND type complex|nucleus|cytosol|	mitotic cell cycle|chromosome segregation|mitotic nuclear division|	protein binding|	9	-2	8.65	7	-1.5	5.25	-1.6	12.9	0.0105	-3.2	-0.9	0	0	0
ENSG00000168481	LGI3	leucine-rich repeat LGI family, member 3	extracellular region|synaptic vesicle|cell junction|neuron projection|	exocytosis|metabolic process|regulation of exocytosis|	catalytic activity|	10	-1.3	6.16	10	-1.4	7.24	-1.3	12.9	0.0105	-2.2	-0.5	0	0	0
ENSG00000101361	NOP56	NOP56 ribonucleoprotein	nucleoplasm|nucleolus|small nucleolar ribonucleoprotein complex|cytoplasm|membrane|box C/D snoRNP complex|pre-snoRNP complex|	rRNA processing|cell death|	RNA binding|protein binding|snoRNA binding|poly(A) RNA binding|	8	-0.5	1.49	8	-1.9	14	-1.9	12.8	0.0107	-3.8	-1.2	0	0	0
ENSG00000160214	RRP1	ribosomal RNA processing 1	nucleus|nucleolus|preribosome, small subunit precursor|	rRNA processing|	poly(A) RNA binding|	9	-1.4	6.84	7	-1.1	6.45	-1.2	12.8	0.0107	-2.3	-0.6	0	0	0
ENSG00000124496	TRERF1	transcriptional regulating factor 1	nucleus|cytoplasm|	regulation of transcription from RNA polymerase II promoter|transcription from RNA polymerase II promoter|steroid biosynthetic process|cholesterol catabolic process|multicellular organismal development|homeostatic process|positive regulation of transcription, DNA-templated|regulation of hormone biosynthetic process|	RNA polymerase II transcription cofactor activity|chromatin binding|sequence-specific DNA binding transcription factor activity|transcription factor binding|DNA binding, bending|ligand-dependent nuclear receptor transcription coactivator activity|metal ion binding|	10	-2.4	12	10	-0.9	5.46	-2.1	12.8	0.0107	-4.2	-0.6	0	0	0
ENSG00000071553	ATP6AP1	ATPase, H+ transporting, lysosomal accessory protein 1	vacuolar membrane|integral component of membrane|proton-transporting two-sector ATPase complex|proton-transporting V-type ATPase, V1 domain|extracellular vesicular exosome|	ATP hydrolysis coupled proton transport|proton transport|positive regulation of osteoblast differentiation|positive regulation of bone resorption|pH reduction|positive regulation of exocytosis|establishment of organelle localization|positive regulation of ERK1 and ERK2 cascade|positive regulation of osteoclast development|	transporter activity|ATP binding|Rab GTPase binding|proton-transporting ATP synthase activity, rotational mechanism|proton-transporting ATPase activity, rotational mechanism|	9	2.3	2.31	8	1.7	11.2	1.8	12.8	0.0107	0.7	3.9	0	0	0
ENSG00000153015	CWC27	CWC27 spliceosome-associated protein homolog (S. cerevisiae)	catalytic step 2 spliceosome|	mRNA splicing, via spliceosome|protein peptidyl-prolyl isomerization|protein folding|	peptidyl-prolyl cis-trans isomerase activity|	10	-1	7.12	10	-1.5	6.6	-0.9	12.8	0.0107	-2	-0.5	0	0	0
ENSG00000164405	UQCRQ	ubiquinol-cytochrome c reductase, complex III subunit VII, 9.5kDa	mitochondrion|mitochondrial inner membrane|respiratory chain|	subthalamus development|pons development|cerebellar Purkinje cell layer development|hippocampus development|thalamus development|hypothalamus development|pyramidal neuron development|respiratory electron transport chain|midbrain development|cellular metabolic process|small molecule metabolic process|hydrogen ion transmembrane transport|	ubiquinol-cytochrome-c reductase activity|	9	-1.1	4.2	9	-1	9.02	-1.1	12.8	0.0107	-1.9	-0.5	0	0	0
ENSG00000072864	NDE1	nudE neurodevelopment protein 1	kinetochore|condensed chromosome kinetochore|centrosome|cytosol|microtubule|membrane|spindle pole centrosome|cleavage furrow|	G2/M transition of mitotic cell cycle|establishment of mitotic spindle orientation|mitotic cell cycle|neuron migration|microtubule nucleation|mitotic nuclear division|neuroblast proliferation|cerebral cortex development|vesicle transport along microtubule|centrosome duplication|establishment of chromosome localization|	protein binding|microtubule binding|protein domain specific binding|identical protein binding|	10	-1.7	6.5	10	-0.7	8.47	-0.8	12.8	0.0107	-2	-0.4	0	0	0
ENSG00000071243	ING3	inhibitor of growth family, member 3	Swr1 complex|nucleus|nucleoplasm|nucleolus|cytoplasm|Piccolo NuA4 histone acetyltransferase complex|NuA4 histone acetyltransferase complex|	chromatin organization|transcription, DNA-templated|regulation of transcription, DNA-templated|regulation of growth|positive regulation of apoptotic process|histone H4 acetylation|histone H2A acetylation|	histone acetyltransferase activity|zinc ion binding|methylated histone binding|	10	-1.3	6.43	10	-0.6	8.28	-0.8	12.8	0.0107	-1.7	-0.4	0	0	0
ENSG00000243989	ACY1	aminoacylase 1	cytosol|extracellular vesicular exosome|	proteolysis|cellular amino acid metabolic process|	aminoacylase activity|metallopeptidase activity|metal ion binding|	9	1.6	1.89	9	1	11.3	1	12.8	0.0107	0.4	2.3	0	0	0
ENSG00000167842	MIS12	MIS12 kinetochore complex component	MIS12/MIND type complex|nucleus|cytosol|	mitotic cell cycle|chromosome segregation|mitotic nuclear division|kinetochore assembly|	protein binding|	8	2.2	1.73	8	1.8	11.5	1.8	12.8	0.0107	1.1	3.6	0	0	0
ENSG00000087088	BAX	BCL2-associated X protein	nucleus|mitochondrion|mitochondrial outer membrane|mitochondrial outer membrane|mitochondrial permeability transition pore complex|endoplasmic reticulum|endoplasmic reticulum membrane|cytosol|cytosol|membrane|pore complex|extracellular vesicular exosome|Bcl-2 family protein complex|BAX complex|	response to acid|ovarian follicle development|neuron migration|T cell homeostatic proliferation|B cell homeostasis|B cell apoptotic process|kidney development|release of cytochrome c from mitochondria|protein insertion into mitochondrial membrane involved in apoptotic signaling pathway|blood vessel remodeling|myeloid cell homeostasis|B cell negative selection|B cell homeostatic proliferation|posi…	protein binding|lipid binding|channel activity|identical protein binding|protein homodimerization activity|protein homodimerization activity|protein heterodimerization activity|BH3 domain binding|BH3 domain binding|	9	0.2	0.444	9	1	14.1	0.9	12.8	0.0107	0.4	1.7	0	0	0
ENSG00000030110	BAK1	BCL2-antagonist/killer 1	mitochondrion|mitochondrial outer membrane|mitochondrial outer membrane|endoplasmic reticulum|cytosol|integral component of mitochondrial outer membrane|pore complex|	B cell homeostasis|B cell apoptotic process|release of cytochrome c from mitochondria|release of cytochrome c from mitochondria|blood vessel remodeling|myeloid cell homeostasis|B cell negative selection|apoptotic process|brain development|aging|mitochondrial fusion|cell proliferation|negative regulation of cell proliferation|intrinsic apoptotic signaling pathway in response to DNA damage|activati…	protein binding|heat shock protein binding|identical protein binding|protein homodimerization activity|metal ion binding|protein heterodimerization activity|chaperone binding|BH domain binding|	10	1.8	4.92	10	0.6	9.82	0.7	12.7	0.0109	0.4	2.1	0	0	0
ENSG00000121067	SPOP	speckle-type POZ protein	nucleus|nuclear speck|Cul3-RING ubiquitin ligase complex|	protein ubiquitination|proteasome-mediated ubiquitin-dependent protein catabolic process|	protein binding|ubiquitin protein ligase binding|	10	-2.7	3.49	10	-0.8	11.4	-0.8	12.7	0.0109	-2.6	-0.3	0	0	0
ENSG00000172425	TTC36	tetratricopeptide repeat domain 36	None	None	None	10	-2	11.6	10	-0.6	6.02	-1.6	12.7	0.0109	-3	-0.5	0	0	0
ENSG00000005955	GGNBP2	gametogenetin binding protein 2	nucleus|cytoplasmic membrane-bounded vesicle|	multicellular organismal development|spermatogenesis|cell differentiation|	None	10	1.8	7.21	10	1.1	7.04	1.4	12.7	0.0109	0.7	3	0	0	0
ENSG00000235568	NFAM1	NFAT activating protein with ITAM motif 1	plasma membrane|cell surface|integral component of membrane|membrane raft|	positive regulation of cytokine production|inflammatory response|signal transduction|B cell differentiation|intracellular signal transduction|regulation of B cell differentiation|B cell receptor signaling pathway|positive regulation of B cell receptor signaling pathway|positive regulation of sequence-specific DNA binding transcription factor activity|	transmembrane signaling receptor activity|	9	-0.8	3.63	10	-2	12	-1.9	12.7	0.0109	-3.6	-1	0	0	0
ENSG00000198558	HIST1H4L	histone cluster 1, H4l	None	None	None	10	-2.6	16.3	10	0.7	3.67	-2.6	12.7	0.0109	-5.2	-1.5	0	0	0
ENSG00000103226	NOMO3	NODAL modulator 3	cellular_component|integral component of membrane|	biological_process|	molecular_function|carbohydrate binding|	10	-1.4	5.48	10	-0.9	8.25	-1	12.7	0.0109	-2	-0.5	0	0	0
ENSG00000215126	CBWD7	COBW domain containing 7	None	None	ATP binding|	10	-1.4	5.09	9	-1.4	7.98	-1.4	12.7	0.0109	-2.3	-0.6	0	0	0
ENSG00000137288	UQCC2	ubiquinol-cytochrome c reductase complex assembly factor 2	nucleus|mitochondrion|mitochondrial inner membrane|mitochondrial intermembrane space|mitochondrial matrix|mitochondrial nucleoid|	regulation of oxidative phosphorylation|regulation of insulin secretion|regulation of skeletal muscle cell differentiation|	None	9	-1.2	6.32	8	-1.6	7.22	-1.4	12.6	0.0111	-2.3	-0.6	0	0	0
ENSG00000186399	GOLGA8R	golgin A8 family, member R	None	None	None	10	2.7	3.34	10	1	11.9	1.3	12.6	0.0111	0.5	3.1	0	0	0
ENSG00000188486	H2AFX	H2A histone family, member X	chromosome, telomeric region|nucleosome|nuclear chromatin|condensed nuclear chromosome|male germ cell nucleus|XY body|nucleus|nucleoplasm|replication fork|site of double-strand break|	DNA damage checkpoint|double-strand break repair via homologous recombination|DNA repair|double-strand break repair|double-strand break repair|nucleosome assembly|cellular response to DNA damage stimulus|meiotic nuclear division|spermatogenesis|response to ionizing radiation|positive regulation of DNA repair|	DNA binding|damaged DNA binding|protein binding|enzyme binding|histone binding|protein heterodimerization activity|	10	1.6	9.72	10	0.9	4.94	1	12.6	0.0111	0.4	2.5	0	0	0
ENSG00000189157	FAM47E	family with sequence similarity 47, member E	None	None	None	10	-1.4	5.63	10	-1.3	7.4	-1.3	12.6	0.0111	-2.6	-0.7	0	0	0
ENSG00000107951	MTPAP	mitochondrial poly(A) polymerase	nucleus|cytoplasm|mitochondrion|Golgi apparatus|plasma membrane|	transcription, DNA-templated|mRNA polyadenylation|cell death|histone mRNA catabolic process|	magnesium ion binding|UTP binding|polynucleotide adenylyltransferase activity|protein binding|ATP binding|manganese ion binding|identical protein binding|protein homodimerization activity|poly(A) RNA binding|	10	-0.8	1.8	10	-1.7	11.8	-1.6	12.6	0.0111	-2.7	-0.7	0	0	0
ENSG00000168066	SF1	splicing factor 1	nucleus|nucleus|spliceosomal complex|ribosome|	spliceosomal complex assembly|mRNA 3'-splice site recognition|mRNA splicing, via spliceosome|transcription, DNA-templated|regulation of transcription, DNA-templated|male sex determination|Leydig cell differentiation|negative regulation of smooth muscle cell proliferation|regulation of steroid biosynthetic process|	transcription corepressor activity|RNA binding|zinc ion binding|poly(A) RNA binding|	7	-1.7	6.82	7	-1	7.79	-1.1	12.6	0.0111	-2.7	-0.6	0	0	0
ENSG00000169992	NLGN2	neuroligin 2	integral component of plasma membrane|integral component of plasma membrane|cell surface|cell surface|membrane|cell junction|presynaptic membrane|synapse|synapse|postsynaptic membrane|inhibitory synapse|	regulation of respiratory gaseous exchange by neurological system process|neuron cell-cell adhesion|synapse assembly|synapse assembly|synapse assembly|single organismal cell-cell adhesion|sensory perception of pain|positive regulation of synaptic transmission, GABAergic|protein localization to synapse|locomotory exploration behavior|cell-cell junction maintenance|regulation of synaptic transmissi…	receptor activity|neurexin family protein binding|neurexin family protein binding|neurexin family protein binding|cell adhesion molecule binding|	10	-1.2	3.67	10	-1.2	9.32	-1.2	12.6	0.0111	-2.3	-0.5	0	0	0
ENSG00000147586	MRPS28	mitochondrial ribosomal protein S28	mitochondrion|mitochondrial small ribosomal subunit|	biological_process|	poly(A) RNA binding|	10	-1.1	6.52	10	-0.8	6.69	-0.9	12.6	0.0111	-1.8	-0.4	0	0	0
ENSG00000204628	GNB2L1	guanine nucleotide binding protein (G protein), beta polypeptide 2-like 1	phagocytic cup|nucleus|cytoplasm|mitochondrion|cytosol|cytoskeleton|small ribosomal subunit|dendrite|midbody|neuronal cell body|perikaryon|perinuclear region of cytoplasm|extracellular vesicular exosome|	positive regulation of protein phosphorylation|activation of cysteine-type endopeptidase activity involved in apoptotic process|cell cycle|gastrulation|negative regulation of gene expression|viral process|negative regulation of translation|negative regulation of Wnt signaling pathway|negative regulation of cell growth|positive regulation of cell migration|positive regulation of cAMP catabolic pro…	protein kinase C binding|receptor binding|protein binding|ion channel inhibitor activity|cysteine-type endopeptidase activator activity involved in apoptotic process|enzyme binding|protein phosphatase binding|protein tyrosine kinase inhibitor activity|receptor tyrosine kinase binding|protein complex scaffold|SH2 domain binding|protein homodimerization activity|poly(A) RNA binding|	9	-2.1	7.14	8	-1.3	7.34	-1.5	12.6	0.0111	-3.1	-0.5	0	0	0
ENSG00000109685	WHSC1	Wolf-Hirschhorn syndrome candidate 1	nucleus|chromosome|nucleolus|cytoplasm|nuclear membrane|	negative regulation of transcription from RNA polymerase II promoter|membranous septum morphogenesis|atrial septum primum morphogenesis|atrial septum secundum morphogenesis|transcription, DNA-templated|anatomical structure morphogenesis|histone lysine methylation|bone development|	DNA binding|chromatin binding|protein binding|zinc ion binding|histone-lysine N-methyltransferase activity|	10	-1.7	9.43	10	-0.6	7.3	-0.8	12.6	0.0111	-2.2	-0.4	0	0	0
ENSG00000164331	ANKRA2	ankyrin repeat, family A (RFXANK-like), 2	nucleus|cytosol|cytoskeleton|membrane|	biological_process|	low-density lipoprotein particle binding|histone deacetylase binding|	9	-2.3	12.7	8	-0.8	4.49	-2.2	12.6	0.0111	-4	-0.8	0	0	0
ENSG00000105248	CCDC94	coiled-coil domain containing 94	None	None	None	7	0.8	2.19	9	1.2	10.9	1.1	12.6	0.0111	0.4	2.1	0	0	0
ENSG00000179104	TMTC2	transmembrane and tetratricopeptide repeat containing 2	endoplasmic reticulum|integral component of membrane|	None	None	10	1.6	5.36	10	0.8	8.14	1.2	12.5	0.0113	0.5	2.5	0	0	0
ENSG00000116703	PDC	phosducin	photoreceptor outer segment|photoreceptor inner segment|nucleus|cytosol|	G-protein coupled receptor signaling pathway|visual perception|phototransduction|negative regulation of catalytic activity|	phospholipase inhibitor activity|	10	-2.3	4.25	10	-1.8	8.81	-1.8	12.5	0.0113	-3.8	-0.8	0	0	0
ENSG00000173566	NUDT18	nudix (nucleoside diphosphate linked moiety X)-type motif 18	cytosol|	nucleobase-containing small molecule catabolic process|small molecule metabolic process|dADP catabolic process|dGDP catabolic process|GDP catabolic process|nucleobase-containing small molecule metabolic process|	magnesium ion binding|protein binding|8-oxo-dGDP phosphatase activity|8-oxo-GDP phosphatase activity|8-hydroxy-dADP phosphatase activity|	10	1.4	7.95	10	1.9	5.81	1.8	12.5	0.0113	0.9	3.3	0	0	0
ENSG00000173540	GMPPB	GDP-mannose pyrophosphorylase B	cytoplasm|mitochondrion|extracellular vesicular exosome|	dolichol-linked oligosaccharide biosynthetic process|GDP-mannose biosynthetic process|GDP-mannose biosynthetic process|protein N-linked glycosylation via asparagine|post-translational protein modification|cellular protein metabolic process|	mannose-1-phosphate guanylyltransferase activity|GTP binding|	9	-1.5	3.9	7	1.5	13.3	1.5	12.5	0.0113	0.7	2.7	0	0	0
ENSG00000186432	KPNA4	karyopherin alpha 4 (importin alpha 3)	nucleoplasm|cytosol|extracellular vesicular exosome|	NLS-bearing protein import into nucleus|cytokine-mediated signaling pathway|	protein binding|protein transporter activity|	10	1.8	2.49	10	1.2	10.6	1.3	12.5	0.0113	0.5	2.6	0	0	0
ENSG00000197932	F8A1	coagulation factor VIII-associated 1	None	None	None	8	-1.2	4.25	8	-1.2	8.66	-1.2	12.5	0.0113	-2.2	-0.6	0	0	0
ENSG00000232119	MCTS1	malignant T cell amplified sequence 1	cytoplasm|plasma membrane|cytosolic small ribosomal subunit|	formation of translation preinitiation complex|IRES-dependent translational initiation|transcription, DNA-templated|regulation of transcription, DNA-templated|cellular response to DNA damage stimulus|cell cycle|positive regulation of cell proliferation|ribosome disassembly|regulation of growth|	RNA binding|	10	0.5	1.65	10	1.7	13.4	1.3	12.5	0.0113	0.6	2.6	0	0	0
ENSG00000102030	NAA10	N(alpha)-acetyltransferase 10, NatA catalytic subunit	intracellular|nucleus|nucleolus|cytoplasm|membrane|NatA complex|	DNA packaging|N-terminal protein amino acid acetylation|internal protein amino acid acetylation|	peptide alpha-N-acetyltransferase activity|protein binding|N-acetyltransferase activity|acetyltransferase activity|ribosome binding|	9	1.3	5.33	8	0.9	8.06	1.1	12.5	0.0113	0.4	2.1	0	0	0
ENSG00000055147	FAM114A2	family with sequence similarity 114, member A2	cellular_component|	biological_process|	purine nucleotide binding|	10	3	12	9	1.4	2.52	2.7	12.5	0.0113	1.3	5.1	0	0	0
ENSG00000187726	DNAJB13	DnaJ (Hsp40) homolog, subfamily B, member 13	cellular_component|	protein folding|	molecular_function|unfolded protein binding|	10	-1.5	7.09	10	-0.7	8.07	-1	12.5	0.0113	-2.2	-0.4	0	0	0
ENSG00000223496	EXOSC6	exosome component 6	exosome (RNase complex)|nucleolus|cytosol|	nuclear-transcribed mRNA catabolic process, deadenylation-dependent decay|rRNA processing|gene expression|RNA metabolic process|mRNA metabolic process|exonucleolytic nuclear-transcribed mRNA catabolic process involved in deadenylation-dependent decay|DNA deamination|isotype switching|	poly(A) RNA binding|	9	-1.2	5.5	7	-0.9	7.72	-1	12.4	0.0116	-2.2	-0.5	0	0	0
ENSG00000204923	FBXO48	F-box protein 48	None	None	None	10	1.8	9.69	10	1.4	3.52	1.6	12.4	0.0116	0.8	3.6	0	0	0
ENSG00000171115	GIMAP8	GTPase, IMAP family member 8	nucleus|cytoplasm|mitochondrion|endoplasmic reticulum|Golgi apparatus|cytosol|	None	GTP binding|	10	-1	3.12	9	-0.6	10.2	-0.7	12.4	0.0116	-1.4	-0.4	0	0	0
ENSG00000178409	BEND3	BEN domain containing 3	None	None	None	10	0.2	0.213	10	-2	13.9	-1	12.4	0.0116	-3	-0.5	0	0	0
ENSG00000181938	GINS3	GINS complex subunit 3 (Psf3 homolog)	nucleus|	DNA replication|	None	10	1.1	6.18	9	1.3	6.79	1.2	12.4	0.0116	0.6	2.1	0	0	0
ENSG00000261739	GOLGA8S	golgin A8 family, member S	None	None	None	9	-0.7	2.71	8	-1.3	11.4	-1.2	12.4	0.0116	-2	-0.8	0	0	0
ENSG00000185115	NDNL2	necdin-like 2	chromosome, telomeric region|nucleus|cytoplasm|Smc5-Smc6 complex|	DNA repair|DNA recombination|regulation of transcription, DNA-templated|positive regulation of protein ubiquitination|regulation of growth|	protein binding|	9	3	8.78	8	1.1	6.52	1.4	12.4	0.0116	0.6	4.3	0	0	0
ENSG00000162722	TRIM58	tripartite motif containing 58	intracellular|	None	zinc ion binding|	10	-1.7	0.762	10	-1.6	12	-1.7	12.4	0.0116	-2.7	-0.5	0	0	0
ENSG00000109911	ELP4	elongator acetyltransferase complex subunit 4	cytoplasm|transcription elongation factor complex|DNA-directed RNA polymerase II, holoenzyme|Elongator holoenzyme complex|	chromatin organization|regulation of transcription from RNA polymerase II promoter|regulation of transcription from RNA polymerase II promoter|transcription elongation from RNA polymerase II promoter|histone acetylation|regulation of protein kinase activity|	histone acetyltransferase activity|protein binding|phosphorylase kinase regulator activity|	10	1.3	3.04	9	1.3	9.73	1.3	12.4	0.0116	0.7	2.4	0	0	0
ENSG00000118197	DDX59	DEAD (Asp-Glu-Ala-Asp) box polypeptide 59	intracellular|nucleus|cytoplasm|	metabolic process|	RNA binding|helicase activity|ATP binding|metal ion binding|	9	1.7	9.6	8	1.6	3.19	1.6	12.4	0.0116	0.9	3.2	0	0	0
ENSG00000140905	GCSH	glycine cleavage system protein H (aminomethyl carrier)	mitochondrion|glycine cleavage complex|	glycine catabolic process|glycine decarboxylation via glycine cleavage system|methylation|methylation|	aminomethyltransferase activity|enzyme binding|	9	-0.7	2.41	10	-0.8	10.3	-0.8	12.3	0.0118	-1.4	-0.4	0	0	0
ENSG00000114346	ECT2	epithelial cell transforming 2	nucleus|cytoplasm|cytosol|cell-cell junction|tight junction|midbody|cleavage furrow|mitotic spindle|centralspindlin complex|	cell morphogenesis|cytokinesis|small GTPase mediated signal transduction|protein transport|activation of protein kinase activity|positive regulation of Rho GTPase activity|positive regulation of Rho GTPase activity|positive regulation of cytokinesis|positive regulation of cytokinesis|activation of Rho GTPase activity|activation of Rac GTPase activity|positive regulation of protein import into nuc…	signal transducer activity|Rho guanyl-nucleotide exchange factor activity|GTPase activator activity|protein binding|Rho GTPase binding|protein homodimerization activity|	10	-0.6	1	10	-1.6	12.5	-1.4	12.3	0.0118	-2.5	-0.7	0	0	0
ENSG00000132017	DCAF15	DDB1 and CUL4 associated factor 15	None	protein ubiquitination|	None	9	-2.6	4.17	8	-1.2	9.94	-1.4	12.3	0.0118	-3.3	-0.5	0	0	0
ENSG00000204922	C11ORF83	N/A	None	None	None	9	-2.1	11.5	10	-0.7	6.43	-1.7	12.3	0.0118	-4.1	-0.4	0	0	0
ENSG00000148296	SURF6	surfeit 6	granular component|nucleoplasm|nucleolus|	ribosome biogenesis|	DNA binding|RNA binding|poly(A) RNA binding|	10	-1.3	5.19	10	-1	7.86	-1	12.3	0.0118	-2	-0.6	0	0	0
ENSG00000219481	NBPF1	neuroblastoma breakpoint family, member 1	cytoplasm|	None	None	9	0	0	10	-1.3	13.4	-1.2	12.3	0.0118	-1.9	-0.8	0	0	0
ENSG00000100596	SPTLC2	serine palmitoyltransferase, long chain base subunit 2	mitochondrion|endoplasmic reticulum membrane|integral component of membrane|serine C-palmitoyltransferase complex|	sphingolipid metabolic process|sphingomyelin biosynthetic process|sphingolipid biosynthetic process|small molecule metabolic process|sphinganine biosynthetic process|sphingosine biosynthetic process|ceramide biosynthetic process|	serine C-palmitoyltransferase activity|pyridoxal phosphate binding|	10	-2.1	5.03	10	-1.4	7.69	-1.5	12.3	0.0118	-2.9	-0.5	0	0	0
ENSG00000117360	PRPF3	pre-mRNA processing factor 3	nucleus|spliceosomal complex|cytoplasm|Cajal body|nuclear speck|U4/U6 x U5 tri-snRNP complex|	RNA splicing, via transesterification reactions|mRNA splicing, via spliceosome|mRNA processing|RNA splicing|	protein binding|identical protein binding|poly(A) RNA binding|	10	-1.2	6.83	9	-1.2	5.9	-1.2	12.3	0.0118	-2.1	-0.5	0	0	0
ENSG00000065427	KARS	lysyl-tRNA synthetase	extracellular region|nucleus|cytoplasm|mitochondrion|mitochondrial matrix|cytosol|plasma membrane|microtubule cytoskeleton|aminoacyl-tRNA synthetase multienzyme complex|	tRNA aminoacylation for protein translation|lysyl-tRNA aminoacylation|tRNA processing|cell death|gene expression|diadenosine tetraphosphate biosynthetic process|viral process|	tRNA binding|lysine-tRNA ligase activity|lysine-tRNA ligase activity|protein binding|ATP binding|amino acid binding|metal ion binding|	9	-0.7	1.84	7	1	13.6	1	12.3	0.0118	0.5	1.8	0	0	0
ENSG00000187990	HIST1H2BG	histone cluster 1, H2bg	None	None	None	10	-1.3	1.94	10	2.1	14.8	2	12.2	0.012	0.8	3.9	0	0	0
ENSG00000165115	KIF27	kinesin family member 27	cytoplasm|kinesin complex|microtubule|cilium|extracellular vesicular exosome|	epithelial cilium movement|metabolic process|ventricular system development|cilium assembly|	microtubule motor activity|ATP binding|microtubule binding|	10	3.6	15.3	10	-0.2	0.213	3.5	12.2	0.012	0.6	6.4	0	0	0
ENSG00000117133	RPF1	ribosome production factor 1 homolog (S. cerevisiae)	nucleolus|	rRNA processing|	RNA binding|rRNA binding|poly(A) RNA binding|	10	2.2	0.974	10	1.2	12.3	1.3	12.2	0.012	0.6	2.9	0	0	0
ENSG00000138363	ATIC	5-aminoimidazole-4-carboxamide ribonucleotide formyltransferase/IMP cyclohydrolase	mitochondrion|cytosol|membrane|extracellular vesicular exosome|	brainstem development|nucleobase-containing compound metabolic process|purine nucleobase metabolic process|'de novo' IMP biosynthetic process|nucleoside metabolic process|purine ribonucleoside monophosphate biosynthetic process|response to inorganic substance|cerebellum development|cerebral cortex development|organ regeneration|small molecule metabolic process|dihydrofolate metabolic process|tetr…	IMP cyclohydrolase activity|phosphoribosylaminoimidazolecarboxamide formyltransferase activity|protein homodimerization activity|	10	0.1	0.064	9	-1.3	12.5	-1.3	12.2	0.012	-2.4	-0.6	0	0	0
ENSG00000196236	XPNPEP3	X-prolyl aminopeptidase (aminopeptidase P) 3, putative	mitochondrion|extracellular vesicular exosome|	glomerular filtration|proteolysis|protein processing|	aminopeptidase activity|metallopeptidase activity|manganese ion binding|	10	-0.5	1.25	10	-1.6	12.7	-1.5	12.2	0.012	-2.6	-0.6	0	0	0
ENSG00000116698	SMG7	SMG7 nonsense mediated mRNA decay factor	nucleus|cytoplasm|cytosol|intermediate filament cytoskeleton|	nuclear-transcribed mRNA catabolic process, nonsense-mediated decay|mRNA export from nucleus|gene expression|RNA metabolic process|mRNA metabolic process|regulation of dephosphorylation|	protein binding|protein phosphatase 2A binding|	10	-0.8	3.51	10	-0.6	9.21	-0.7	12.2	0.012	-1.5	-0.3	0	0	0
ENSG00000156860	FBRS	fibrosin	None	None	None	9	-0.5	2.05	10	-1.3	12.7	-1.2	12.2	0.012	-2.2	-0.4	0	0	0
ENSG00000176515	AL033381.1	N/A	None	None	None	9	-1.3	7.12	9	-2.3	6.68	-2.2	12.2	0.012	-3.7	-1	0	0	0
ENSG00000115484	CCT4	chaperonin containing TCP1, subunit 4 (delta)	zona pellucida receptor complex|nucleus|cytoplasm|centrosome|cytosol|chaperonin-containing T-complex|microtubule|melanosome|cell body|extracellular vesicular exosome|	protein folding|binding of sperm to zona pellucida|cellular protein metabolic process|'de novo' posttranslational protein folding|	protein binding|ATP binding|poly(A) RNA binding|unfolded protein binding|	8	-1.8	10.3	6	0.5	4.43	-1.6	12.2	0.012	-3.5	-1	0	0	0
ENSG00000146109	ABT1	activator of basal transcription 1	nucleus|transcription factor complex|nucleolus|	regulation of transcription from RNA polymerase II promoter|transcription from RNA polymerase II promoter|spinal cord motor neuron differentiation|	nucleotide binding|DNA binding|transcription coactivator activity|protein binding|poly(A) RNA binding|	8	-0.8	2.84	9	-1.3	10.3	-1.2	12.2	0.012	-1.9	-0.6	0	0	0
ENSG00000101405	OXT	oxytocin/neurophysin I prepropeptide	extracellular region|extracellular space|secretory granule|terminal bouton|	response to amphetamine|regulation of heart rate|maternal aggressive behavior|signal transduction|positive regulation of cytosolic calcium ion concentration|heart development|female pregnancy|memory|grooming behavior|response to sucrose|positive regulation of norepinephrine secretion|response to activity|sleep|response to food|positive regulation of prostaglandin secretion|response to estradiol|r…	neurohypophyseal hormone activity|oxytocin receptor binding|	10	-0.9	2.41	10	-0.8	10.3	-0.9	12.2	0.012	-1.5	-0.4	0	0	0
ENSG00000240230	COX19	cytochrome c oxidase assembly homolog 19 (S. cerevisiae)	cytoplasm|cytosol|	None	None	9	0	0	10	-0.9	13.3	-0.9	12.2	0.012	-2.1	-0.5	0	0	0
ENSG00000105058	FAM32A	family with sequence similarity 32, member A	nucleus|nucleolus|mitochondrion|intracellular membrane-bounded organelle|	apoptotic process|cell cycle|biological_process|	protein binding|poly(A) RNA binding|	10	-1.4	8.24	10	-1.7	4.6	-1.6	12.2	0.012	-2.8	-0.6	0	0	0
ENSG00000106948	AKNA	AT-hook transcription factor	nucleus|membrane|	transcription, DNA-templated|positive regulation of transcription from RNA polymerase II promoter|	RNA polymerase II core promoter proximal region sequence-specific DNA binding|RNA polymerase II core promoter proximal region sequence-specific DNA binding transcription factor activity involved in positive regulation of transcription|	10	1.9	4.45	10	1.6	8.24	1.6	12.2	0.012	0.6	3.1	0	0	0
ENSG00000090060	PAPOLA	poly(A) polymerase alpha	nucleus|nucleus|nucleoplasm|cytoplasm|	mRNA splicing, via spliceosome|transcription from RNA polymerase II promoter|termination of RNA polymerase II transcription|RNA splicing|gene expression|mRNA 3'-end processing|RNA polyadenylation|	magnesium ion binding|RNA binding|polynucleotide adenylyltransferase activity|polynucleotide adenylyltransferase activity|ATP binding|manganese ion binding|	10	0.7	2.47	10	0.7	10	0.7	12.2	0.012	0.3	1.3	0	0	0
ENSG00000126067	PSMB2	proteasome (prosome, macropain) subunit, beta type, 2	proteasome complex|nucleus|nucleoplasm|cytosol|proteasome core complex|membrane|extracellular vesicular exosome|	G1/S transition of mitotic cell cycle|protein polyubiquitination|mitotic cell cycle|antigen processing and presentation of peptide antigen via MHC class I|antigen processing and presentation of exogenous peptide antigen via MHC class I, TAP-dependent|regulation of cellular amino acid metabolic process|apoptotic process|DNA damage response, signal transduction by p53 class mediator resulting in ce…	threonine-type endopeptidase activity|protein binding|	8	-2.1	10.1	9	-1.2	3.31	-1.4	12.1	0.0122	-3.4	-0.5	0	0	0
ENSG00000086232	EIF2AK1	eukaryotic translation initiation factor 2-alpha kinase 1	cytoplasm|	response to stress|negative regulation of cell proliferation|response to external stimulus|regulation of eIF2 alpha phosphorylation by heme|negative regulation of translational initiation by iron|protoporphyrinogen IX metabolic process|protein autophosphorylation|negative regulation of hemoglobin biosynthetic process|	eukaryotic translation initiation factor 2alpha kinase activity|ATP binding|heme binding|protein homodimerization activity|	10	-2.1	4.68	10	-1.7	8.23	-1.8	12.1	0.0122	-3.4	-1.1	0	0	0
ENSG00000111707	SUDS3	suppressor of defective silencing 3 homolog (S. cerevisiae)	nucleus|cytoplasm|plasma membrane|Sin3 complex|	negative regulation of transcription from RNA polymerase II promoter|transcription, DNA-templated|apoptotic process|histone deacetylation|substantia nigra development|positive regulation of apoptotic process|negative regulation of transcription, DNA-templated|	histone deacetylase activity|protein binding|enzyme binding|protein homodimerization activity|histone deacetylase binding|	8	-1.4	2.32	9	-1.1	10.5	-1.2	12.1	0.0122	-2.2	-0.5	0	0	0
ENSG00000043093	DCUN1D1	DCN1, defective in cullin neddylation 1, domain containing 1	ubiquitin ligase complex|	biological_process|	protein binding|	10	-1.8	10.6	10	-1.3	2.6	-1.6	12.1	0.0122	-3	-0.8	0	0	0
ENSG00000100410	PHF5A	PHD finger protein 5A	nucleoplasm|U2 snRNP|U12-type spliceosomal complex|nuclear matrix|nuclear speck|	mRNA splicing, via spliceosome|mRNA splicing, via spliceosome|transcription, DNA-templated|RNA splicing|gene expression|positive regulation of transcription, DNA-templated|	DNA binding|sequence-specific DNA binding transcription factor activity|poly(A) RNA binding|	9	-2.2	0.152	9	0.9	13.7	0.8	12.1	0.0122	0.4	1.6	0	0	0
ENSG00000165792	METTL17	methyltransferase like 17	mitochondrion|ribosome|	translation|methylation|	copper ion binding|protein binding|methyltransferase activity|	9	-1.8	7.57	9	-0.9	6.36	-1.2	12.1	0.0122	-2.6	-0.5	0	0	0
ENSG00000130725	UBE2M	ubiquitin-conjugating enzyme E2M	cytosol|extracellular vesicular exosome|	cellular protein modification process|cellular protein modification process|transforming growth factor beta receptor signaling pathway|protein ubiquitination|protein ubiquitination|positive regulation of neuron apoptotic process|protein neddylation|protein neddylation|	ubiquitin-protein transferase activity|ubiquitin-protein transferase activity|protein binding|ATP binding|ribosomal S6-glutamic acid ligase activity|NEDD8 ligase activity|	10	-2	8.77	10	-0.9	7.5	-1.7	12.1	0.0122	-2.8	-0.6	0	0	0
ENSG00000035687	ADSS	adenylosuccinate synthase	cytoplasm|cytosol|plasma membrane|	immune system process|purine nucleobase metabolic process|AMP biosynthetic process|AMP biosynthetic process|GTP catabolic process|aspartate metabolic process|purine ribonucleoside monophosphate biosynthetic process|response to purine-containing compound|'de novo' AMP biosynthetic process|small molecule metabolic process|IMP metabolic process|nucleobase-containing small molecule metabolic process|…	magnesium ion binding|adenylosuccinate synthase activity|adenylosuccinate synthase activity|protein binding|GTP binding|phosphate ion binding|	5	-0.4	0.511	6	-1.4	13	-1.3	12.1	0.0122	-2.7	-0.6	0	0	0
ENSG00000179603	GRM8	glutamate receptor, metabotropic 8	plasma membrane|integral component of plasma membrane|presynaptic membrane|	adenylate cyclase-inhibiting G-protein coupled glutamate receptor signaling pathway|visual perception|sensory perception of smell|negative regulation of cAMP biosynthetic process|regulation of synaptic transmission, glutamatergic|	group III metabotropic glutamate receptor activity|G-protein coupled receptor activity|glutamate receptor activity|	10	-1.2	6.38	10	-0.8	6.72	-1	12.1	0.0122	-1.8	-0.4	0	0	0
ENSG00000136718	IMP4	IMP4, U3 small nucleolar ribonucleoprotein	nucleolus|ribonucleoprotein complex|	rRNA processing|	protein binding|	9	-1.3	4.42	9	1	13.3	0.9	12.1	0.0122	-1.2	2	0	0	0
ENSG00000156508	EEF1A1	eukaryotic translation elongation factor 1 alpha 1	extracellular space|nucleus|nucleolus|cytoplasm|cytoplasm|cytoplasm|cytosol|eukaryotic translation elongation factor 1 complex|plasma membrane|membrane|extracellular vesicular exosome|	GTP catabolic process|transcription, DNA-templated|regulation of transcription, DNA-templated|translation|translational elongation|gene expression|cellular protein metabolic process|cellular response to epidermal growth factor stimulus|	translation elongation factor activity|GTPase activity|protein binding|GTP binding|protein kinase binding|poly(A) RNA binding|	8	2.1	10	8	0.7	5.67	2	12.1	0.0122	0.6	3.8	0	0	0
ENSG00000100207	TCF20	transcription factor 20 (AR1)	nucleus|nucleus|	transcription, DNA-templated|regulation of transcription, DNA-templated|	DNA binding|transcription coactivator activity|zinc ion binding|poly(A) RNA binding|	10	-0.9	3.06	10	-1.5	9.77	-1.5	12	0.0124	-2.3	-0.5	0	0	0
ENSG00000075539	FRYL	FRY-like	None	transcription, DNA-templated|regulation of transcription, DNA-templated|	None	10	-1.4	4.01	10	-1.8	8.46	-1.9	12	0.0124	-3	-0.4	0	0	0
ENSG00000110200	ANAPC15	anaphase promoting complex subunit 15	intracellular|anaphase-promoting complex|	mitotic nuclear division|regulation of mitotic cell cycle spindle assembly checkpoint|	None	9	-1.3	2.82	9	-0.8	9.69	-0.9	12	0.0124	-1.8	-0.4	0	0	0
ENSG00000171863	RPS7	ribosomal protein S7	nucleus|nucleolus|cytoplasm|microtubule organizing center|cytosol|ribosome|membrane|cytosolic small ribosomal subunit|cytosolic small ribosomal subunit|ribonucleoprotein complex|90S preribosome|small-subunit processome|extracellular vesicular exosome|	nuclear-transcribed mRNA catabolic process, nonsense-mediated decay|cytoplasmic translation|rRNA processing|translation|translation|translation|translational initiation|translational elongation|translational termination|SRP-dependent cotranslational protein targeting to membrane|gene expression|viral process|RNA metabolic process|mRNA metabolic process|viral life cycle|viral transcription|ribosom…	RNA binding|structural constituent of ribosome|protein binding|poly(A) RNA binding|	9	0.8	2.42	8	0.7	9.93	0.7	12	0.0124	0.3	1.4	0	0	0
ENSG00000100749	VRK1	vaccinia related kinase 1	nucleus|nucleoplasm|nucleolus|cytoplasm|Golgi stack|spindle|cytosol|	mitotic cell cycle|protein phosphorylation|mitotic nuclear division|mitotic nuclear envelope disassembly|mitotic nuclear envelope reassembly|histone H3-S10 phosphorylation|protein autophosphorylation|histone H3-T3 phosphorylation|Golgi disassembly|	protein kinase activity|protein serine/threonine kinase activity|protein binding|ATP binding|nucleosomal histone binding|histone kinase activity (H3-S10 specific)|histone kinase activity (H3-T3 specific)|	10	-0.8	2.15	10	-1	10.3	-0.9	12	0.0124	-1.6	-0.5	0	0	0
ENSG00000082929	C4ORF6	chromosome 4 open reading frame 6	None	nervous system development|	None	10	2.3	1.76	10	2.1	10.6	2.1	12	0.0124	1.5	4	0	0	0
ENSG00000111615	KRR1	KRR1, small subunit (SSU) processome component, homolog (yeast)	nucleus|nucleolus|cytoplasm|membrane|ribonucleoprotein complex|intercellular bridge|	rRNA processing|	protein binding|poly(A) RNA binding|	9	-1.7	3.37	9	1.6	14.5	1.3	12	0.0124	0.4	2.5	0	0	0
ENSG00000182504	CEP97	centrosomal protein 97kDa	cytoplasm|centrosome|microtubule organizing center|protein complex|	cell projection organization|	protein binding|calmodulin binding|	8	-1.2	5.47	10	-1.7	7.53	-1.5	12	0.0124	-2.7	-0.9	0	0	0
ENSG00000272987	OR5AL1	olfactory receptor, family 5, subfamily AL, member 1 (gene/pseudogene)	plasma membrane|integral component of membrane|	G-protein coupled receptor signaling pathway|detection of chemical stimulus involved in sensory perception of smell|	G-protein coupled receptor activity|olfactory receptor activity|	10	1.7	9.52	9	0.7	6.47	0.8	11.9	0.0126	0.4	2.9	0	0	0
ENSG00000115289	PCGF1	polycomb group ring finger 1	nucleus|PcG protein complex|	transcription, DNA-templated|regulation of transcription, DNA-templated|histone H2A monoubiquitination|	protein binding|protein C-terminus binding|zinc ion binding|	10	1	3.78	10	0.9	8.6	0.9	11.9	0.0126	0.4	1.7	0	0	0
ENSG00000099326	MZF1	myeloid zinc finger 1	nucleus|	negative regulation of transcription from RNA polymerase II promoter|transcription, DNA-templated|regulation of transcription, DNA-templated|positive regulation of transcription from RNA polymerase II promoter|	RNA polymerase II core promoter proximal region sequence-specific DNA binding|RNA polymerase II core promoter proximal region sequence-specific DNA binding transcription factor activity involved in positive regulation of transcription|RNA polymerase II core promoter proximal region sequence-specific DNA binding transcription factor activity involved in negative regulation of transcription|sequenc…	10	-0.5	0.413	10	-1	12.2	-1	11.9	0.0126	-1.7	-0.5	0	0	0
ENSG00000249115	HAUS5	HAUS augmin-like complex, subunit 5	cytoplasm|centrosome|spindle|microtubule|HAUS complex|	mitotic nuclear division|spindle assembly|centrosome organization|	molecular_function|	10	-3.2	15.5	9	1.8	5.25	-3.2	11.9	0.0126	-5.8	-1.1	0	0	0
ENSG00000196550	FAM72A	family with sequence similarity 72, member A	mitochondrion|	None	None	6	-2.8	14.9	6	0	0	-2.8	11.9	0.0126	-5.5	-1.6	0	0	0
ENSG00000203760	CENPW	centromere protein W	chromosome, centromeric region|kinetochore|condensed chromosome kinetochore|nucleolus|nuclear matrix|	mitotic cell cycle|chromosome segregation|chromosome segregation|mitotic nuclear division|centromere-specific nucleosome assembly|chromosome organization|kinetochore assembly|	DNA binding|protein binding|protein heterodimerization activity|	9	-2.9	4.08	9	-0.8	10.6	-0.7	11.9	0.0126	-3.3	-0.3	0	0	0
ENSG00000172262	ZNF131	zinc finger protein 131	nucleus|	regulation of transcription, DNA-templated|regulation of transcription from RNA polymerase II promoter|transcription from RNA polymerase II promoter|transcription from RNA polymerase II promoter|	sequence-specific DNA binding RNA polymerase II transcription factor activity|DNA binding|sequence-specific DNA binding transcription factor activity|metal ion binding|	9	-1.6	13.8	8	-0.4	0.975	-1.6	11.9	0.0126	-2.7	-0.7	0	0	0
ENSG00000239857	GET4	golgi to ER traffic protein 4 homolog (S. cerevisiae)	cytosol|BAT3 complex|	transport|tail-anchored membrane protein insertion into ER membrane|	None	10	-1	2.13	10	-1.5	10.2	-1	11.9	0.0126	-2.4	-0.5	0	0	0
ENSG00000133103	COG6	component of oligomeric golgi complex 6	Golgi membrane|Golgi transport complex|	intra-Golgi vesicle-mediated transport|protein transport|glycosylation|	None	10	-0.8	4.54	10	-1.4	9.43	-1.3	11.9	0.0126	-2.1	-0.4	0	0	0
ENSG00000145191	EIF2B5	eukaryotic translation initiation factor 2B, subunit 5 epsilon, 82kDa	nucleus|cytoplasm|cytosol|eukaryotic translation initiation factor 2B complex|	ovarian follicle development|translation|translational initiation|translational initiation|response to heat|response to heat|response to heat|response to glucose|gene expression|astrocyte development|oligodendrocyte development|negative regulation of translational initiation in response to stress|response to endoplasmic reticulum stress|cellular response to drug|myelination|response to peptide ho…	translation initiation factor activity|translation initiation factor activity|guanyl-nucleotide exchange factor activity|guanyl-nucleotide exchange factor activity|guanyl-nucleotide exchange factor activity|protein binding|translation initiation factor binding|	10	-1.6	4.36	9	-2	8.01	-1.8	11.8	0.0128	-3.2	-0.6	0	0	0
ENSG00000134057	CCNB1	cyclin B1	spindle pole|condensed nuclear chromosome outer kinetochore|nucleus|nucleoplasm|cytoplasm|centrosome|cytosol|membrane|	regulation of cyclin-dependent protein serine/threonine kinase activity|G1/S transition of mitotic cell cycle|G2/M transition of mitotic cell cycle|mitotic cell cycle|oocyte maturation|in utero embryonic development|negative regulation of protein phosphorylation|protein complex assembly|protein phosphorylation|mitotic nuclear envelope disassembly|mitotic metaphase plate congression|spermatogenesi…	patched binding|protein binding|kinase activity|protein kinase binding|	10	0	0	10	-0.7	12.9	-0.7	11.8	0.0128	-1.4	-0.3	0	0	0
ENSG00000110107	PRPF19	pre-mRNA processing factor 19	ubiquitin ligase complex|Prp19 complex|nucleus|cytoplasm|lipid particle|spindle|membrane|nuclear speck|catalytic step 2 spliceosome|	protein polyubiquitination|spliceosomal complex assembly|mRNA splicing, via spliceosome|mRNA splicing, via spliceosome|inner cell mass cell proliferation|DNA repair|lipid biosynthetic process|negative regulation of neuron differentiation|positive regulation of mRNA splicing, via spliceosome|positive regulation of astrocyte differentiation|	DNA binding|ubiquitin-protein transferase activity|protein binding|ubiquitin-ubiquitin ligase activity|identical protein binding|	10	1.9	4.06	7	-1.1	13	-1.1	11.8	0.0128	-2	-0.4	0	0	0
ENSG00000072506	HSD17B10	hydroxysteroid (17-beta) dehydrogenase 10	cytoplasm|mitochondrion|mitochondrial inner membrane|mitochondrial matrix|endoplasmic reticulum|plasma membrane|	lipid metabolic process|tRNA processing|branched-chain amino acid catabolic process|cellular nitrogen compound metabolic process|small molecule metabolic process|oxidation-reduction process|	3-hydroxyacyl-CoA dehydrogenase activity|protein binding|cholate 7-alpha-dehydrogenase activity|testosterone dehydrogenase [NAD(P)] activity|poly(A) RNA binding|3-hydroxy-2-methylbutyryl-CoA dehydrogenase activity|	9	-1.4	7.68	8	-1.5	4.51	-1.5	11.8	0.0128	-2.7	-0.6	0	0	0
ENSG00000131473	ACLY	ATP citrate lyase	nucleus|cytoplasm|mitochondrion|cytosol|plasma membrane|citrate lyase complex|membrane|extracellular vesicular exosome|	citrate metabolic process|energy reserve metabolic process|ATP catabolic process|lipid biosynthetic process|coenzyme A metabolic process|triglyceride biosynthetic process|positive regulation of cellular metabolic process|long-chain fatty-acyl-CoA biosynthetic process|cellular lipid metabolic process|cellular carbohydrate metabolic process|small molecule metabolic process|	ATP citrate synthase activity|succinate-CoA ligase (ADP-forming) activity|protein binding|ATP binding|metal ion binding|cofactor binding|	9	-1.9	10.8	8	-1	3.72	-1.7	11.8	0.0128	-3.1	-0.7	0	0	0
ENSG00000099995	SF3A1	splicing factor 3a, subunit 1, 120kDa	nucleus|nucleoplasm|spliceosomal complex|U2-type spliceosomal complex|catalytic step 2 spliceosome|	mRNA 3'-splice site recognition|mRNA splicing, via spliceosome|mRNA splicing, via spliceosome|mRNA splicing, via spliceosome|mRNA processing|RNA splicing|gene expression|	RNA binding|protein binding|poly(A) RNA binding|	9	-0.9	3.62	8	-0.9	8.58	-0.9	11.8	0.0128	-1.5	-0.4	0	0	0
ENSG00000163781	TOPBP1	topoisomerase (DNA) II binding protein 1	condensed nuclear chromosome|spindle pole|male germ cell nucleus|nucleus|chromosome|cytoplasm|microtubule organizing center|plasma membrane|PML body|	DNA metabolic process|DNA repair|cellular response to DNA damage stimulus|response to ionizing radiation|	DNA binding|protein binding|protein C-terminus binding|identical protein binding|	10	-0.5	1.31	9	1.8	14.9	1.8	11.8	0.0128	1.4	3	0	0	0
ENSG00000152795	HNRNPDL	heterogeneous nuclear ribonucleoprotein D-like	nucleus|spliceosomal complex|cytoplasm|extracellular vesicular exosome|	transcription, DNA-templated|regulation of transcription, DNA-templated|RNA processing|regulation of gene expression|	nucleotide binding|DNA binding|double-stranded DNA binding|single-stranded DNA binding|poly(A) binding|poly(G) binding|poly(A) RNA binding|	10	2	4.83	10	0.8	8.31	0.9	11.8	0.0128	0.4	2.6	0	0	0
ENSG00000188488	SERPINA5	serpin peptidase inhibitor, clade A (alpha-1 antiproteinase, antitrypsin), member 5	acrosomal membrane|extracellular region|extracellular region|extracellular region|extracellular space|external side of plasma membrane|membrane|platelet alpha granule|platelet dense tubular network|protein C inhibitor-TMPRSS7 complex|protein C inhibitor-TMPRSS11E complex|protein C inhibitor-PLAT complex|protein C inhibitor-PLAU complex|protein C inhibitor-thrombin complex|protein C inhibitor-KLK3…	lipid transport|spermatogenesis|fusion of sperm to egg plasma membrane|negative regulation of endopeptidase activity|regulation of proteolysis|negative regulation of proteolysis|	retinoic acid binding|protease binding|serine-type endopeptidase inhibitor activity|glycosaminoglycan binding|heparin binding|phosphatidylcholine binding|acrosin binding|	10	1	2.35	10	1.1	9.81	1.1	11.8	0.0128	0.5	2	0	0	0
ENSG00000165629	ATP5C1	ATP synthase, H+ transporting, mitochondrial F1 complex, gamma polypeptide 1	mitochondrial proton-transporting ATP synthase complex, catalytic core F(1)|mitochondrion|mitochondrion|mitochondrial inner membrane|mitochondrial proton-transporting ATP synthase complex|mitochondrial matrix|membrane|extracellular vesicular exosome|	oxidative phosphorylation|ATP catabolic process|ATP catabolic process|ATP biosynthetic process|respiratory electron transport chain|mitochondrial ATP synthesis coupled proton transport|mitochondrial ATP synthesis coupled proton transport|cellular metabolic process|small molecule metabolic process|	ATPase activity|ATPase activity|transmembrane transporter activity|poly(A) RNA binding|proton-transporting ATP synthase activity, rotational mechanism|proton-transporting ATPase activity, rotational mechanism|	10	1.8	2.91	10	-1.2	12.5	-1.1	11.8	0.0128	-2	-0.6	0	0	0
ENSG00000062650	WAPAL	wings apart-like homolog (Drosophila)	chromosome, centromeric region|chromatin|synaptonemal complex|nucleus|nucleoplasm|chromosome|cytoplasm|cytosol|cohesin complex|microtubule cytoskeleton|intracellular membrane-bounded organelle|	mitotic cell cycle|mitotic nuclear division|negative regulation of DNA replication|response to toxic substance|viral process|negative regulation of chromatin binding|negative regulation of sister chromatid cohesion|protein localization to chromatin|regulation of cohesin localization to chromatin|	protein binding|	10	-1.9	0.637	9	-1.3	11.6	-1.3	11.8	0.0128	-3	-0.8	0	0	0
ENSG00000099331	MYO9B	myosin IXB	ruffle|cytoplasm|cytosol|cell cortex|actin cytoskeleton|membrane|myosin complex|lamellipodium|filamentous actin|filopodium tip|perinuclear region of cytoplasm|	monocyte chemotaxis|ATP catabolic process|small GTPase mediated signal transduction|Rho protein signal transduction|establishment of cell polarity|actin filament-based movement|positive regulation of Rho GTPase activity|macrophage chemotaxis|regulation of small GTPase mediated signal transduction|lamellipodium morphogenesis|	microfilament motor activity|actin binding|Rho GTPase activator activity|protein binding|calmodulin binding|ATP binding|zinc ion binding|ATPase activity|actin-dependent ATPase activity|ATP-dependent protein binding|ADP binding|actin filament binding|	9	0.5	0.543	9	-0.9	11.9	-0.8	11.7	0.013	-1.8	-0.4	0	0	0
ENSG00000154917	RAB6B	RAB6B, member RAS oncogene family	Golgi membrane|Golgi apparatus|cytoplasmic membrane-bounded vesicle|	GTP catabolic process|retrograde vesicle-mediated transport, Golgi to ER|small GTPase mediated signal transduction|protein transport|	GTPase activity|protein binding|GTP binding|	10	-1.9	2.7	10	1	10.8	1.2	11.7	0.013	0.4	2.6	0	0	0
ENSG00000091009	RBM27	RNA binding motif protein 27	nucleus|cytoplasm|nuclear speck|	mRNA processing|	nucleotide binding|poly(A) RNA binding|metal ion binding|	9	0	0	9	-1.3	12.4	-1.3	11.7	0.013	-2.5	-0.7	0	0	0
ENSG00000141298	SSH2	slingshot protein phosphatase 2	extracellular space|cytoplasm|cytoskeleton|	protein dephosphorylation|regulation of actin polymerization or depolymerization|regulation of lamellipodium assembly|actin cytoskeleton organization|peptidyl-tyrosine dephosphorylation|regulation of axonogenesis|	DNA binding|actin binding|phosphoprotein phosphatase activity|protein tyrosine phosphatase activity|protein tyrosine/serine/threonine phosphatase activity|	10	-2	2.48	10	-1.6	9.67	-1.6	11.7	0.013	-3.2	-0.9	0	0	0
ENSG00000088826	SMOX	spermine oxidase	nucleus|nucleus|cytoplasm|cytosol|	polyamine metabolic process|polyamine biosynthetic process|polyamine catabolic process|xenobiotic metabolic process|cellular nitrogen compound metabolic process|small molecule metabolic process|spermine catabolic process|spermine catabolic process|oxidation-reduction process|oxidation-reduction process|	polyamine oxidase activity|norspermine:oxygen oxidoreductase activity|N1-acetylspermine:oxygen oxidoreductase (N1-acetylspermidine-forming) activity|spermine:oxygen oxidoreductase (spermidine-forming) activity|	10	0.8	2.43	10	0.7	9.67	0.7	11.7	0.013	0.3	1.5	0	0	0
ENSG00000171940	ZNF217	zinc finger protein 217	histone deacetylase complex|nucleoplasm|	transcription, DNA-templated|regulation of transcription, DNA-templated|negative regulation of transcription, DNA-templated|	sequence-specific DNA binding transcription factor activity|protein binding|transcription regulatory region DNA binding|metal ion binding|	9	-1.4	4.44	8	-1.7	7.89	-1.6	11.7	0.013	-2.7	-0.7	0	0	0
ENSG00000269084	AC009977.1	N/A	None	None	None	4	1.5	2.95	4	1.1	9.05	1.1	11.6	0.0133	0.7	2.7	0	0	0
ENSG00000258674	CTC-260F20.3	N/A	None	None	None	10	-0.8	2.21	10	-1.4	9.83	-0.9	11.6	0.0133	-2.2	-0.5	0	0	0
ENSG00000122643	NT5C3A	5'-nucleotidase, cytosolic IIIA	cytoplasm|mitochondrion|endoplasmic reticulum|cytosol|	pyrimidine nucleobase metabolic process|pyrimidine nucleoside metabolic process|nucleotide metabolic process|dephosphorylation|dephosphorylation|dephosphorylation|dephosphorylation|small molecule metabolic process|adenosine metabolic process|pyrimidine nucleoside catabolic process|nucleobase-containing small molecule metabolic process|	nucleotide binding|magnesium ion binding|5'-nucleotidase activity|5'-nucleotidase activity|5'-nucleotidase activity|2'-phosphotransferase activity|2'-phosphotransferase activity|	10	-2.5	4.31	10	-1.7	8.26	-1.8	11.6	0.0133	-3.8	-0.5	0	0	0
ENSG00000198064	RP11-347C12.1	N/A	None	None	None	10	2.1	1.63	10	-1.7	14.1	-1.6	11.6	0.0133	-2.8	-0.5	0	0	0
ENSG00000086848	ALG9	ALG9, alpha-1,2-mannosyltransferase	endoplasmic reticulum membrane|membrane|integral component of membrane|	dolichol-linked oligosaccharide biosynthetic process|protein N-linked glycosylation via asparagine|post-translational protein modification|cellular protein metabolic process|mannosylation|	dol-P-Man:Man(8)GlcNAc(2)-PP-Dol alpha-1,2-mannosyltransferase activity|dol-P-Man:Man(6)GlcNAc(2)-PP-Dol alpha-1,2-mannosyltransferase activity|	8	1.4	5.05	10	1.6	7.11	1.5	11.6	0.0133	0.9	2.7	0	0	0
ENSG00000214513	NOTO	notochord homeobox	nucleus|	transcription, DNA-templated|regulation of transcription, DNA-templated|determination of left/right symmetry|embryonic pattern specification|dorsal/ventral pattern formation|notochord development|cilium morphogenesis|	sequence-specific DNA binding transcription factor activity|sequence-specific DNA binding|	9	-0.9	3.09	9	-1.4	9.3	-1.4	11.6	0.0133	-2.4	-0.5	0	0	0
ENSG00000187082	DEFB106B	defensin, beta 106B	extracellular region|	defense response to bacterium|	None	10	0.8	3.95	10	0.7	8.09	0.7	11.6	0.0133	0.3	1.6	0	0	0
ENSG00000082701	GSK3B	glycogen synthase kinase 3 beta	nucleus|cytoplasm|centrosome|cytosol|plasma membrane|growth cone|ribonucleoprotein complex|beta-catenin destruction complex|beta-catenin destruction complex|neuronal cell body|dendritic spine|dendritic shaft|membrane raft|perinuclear region of cytoplasm|	re-entry into mitotic cell cycle|epithelial to mesenchymal transition|positive regulation of cell-matrix adhesion|glycogen metabolic process|regulation of gene expression by genetic imprinting|protein phosphorylation|protein export from nucleus|ER overload response|epidermal growth factor receptor signaling pathway|axon guidance|myoblast fusion|circadian rhythm|fibroblast growth factor receptor s…	RNA polymerase II transcription factor binding|p53 binding|protein serine/threonine kinase activity|protein serine/threonine kinase activity|integrin binding|protein binding|ATP binding|beta-catenin binding|kinase activity|kinase activity|protein kinase binding|ubiquitin protein ligase binding|protein kinase A catalytic subunit binding|ionotropic glutamate receptor binding|tau protein binding|tau…	10	-0.5	0.861	10	-2	13.8	-1.2	11.6	0.0133	-3.1	-0.4	0	0	0
ENSG00000144744	UBA3	ubiquitin-like modifier activating enzyme 3	nucleus|cytosol|	cellular protein modification process|proteolysis|endomitotic cell cycle|protein neddylation|protein neddylation|regulation of cell cycle|	protein binding|ATP binding|acid-amino acid ligase activity|NEDD8 activating enzyme activity|protein heterodimerization activity|	9	-2.2	4.01	10	-1.9	8.16	-1.9	11.6	0.0133	-5	2.3	0	0	0
ENSG00000146701	MDH2	malate dehydrogenase 2, NAD (mitochondrial)	nucleus|mitochondrion|mitochondrial inner membrane|mitochondrial matrix|plasma membrane|extracellular vesicular exosome|	carbohydrate metabolic process|glucose metabolic process|gluconeogenesis|tricarboxylic acid cycle|oxaloacetate metabolic process|malate metabolic process|malate metabolic process|internal protein amino acid acetylation|NADH metabolic process|cellular metabolic process|cellular carbohydrate metabolic process|small molecule metabolic process|	L-malate dehydrogenase activity|L-malate dehydrogenase activity|L-malate dehydrogenase activity|protein self-association|poly(A) RNA binding|malate dehydrogenase (NADP+) activity|	10	-1	5.64	10	-1	6.29	-1	11.6	0.0133	-2	-0.5	0	0	0
ENSG00000142875	PRKACB	protein kinase, cAMP-dependent, catalytic, beta	nucleoplasm|centrosome|cytosol|plasma membrane|cAMP-dependent protein kinase complex|perinuclear region of cytoplasm|extracellular vesicular exosome|	carbohydrate metabolic process|glucose metabolic process|gluconeogenesis|energy reserve metabolic process|protein phosphorylation|water transport|signal transduction|epidermal growth factor receptor signaling pathway|adenylate cyclase-modulating G-protein coupled receptor signaling pathway|activation of phospholipase C activity|synaptic transmission|blood coagulation|fibroblast growth factor rece…	magnesium ion binding|cAMP-dependent protein kinase activity|protein binding|ATP binding|ubiquitin protein ligase binding|	10	-1.7	4.33	10	-2.4	8.85	-2.3	11.6	0.0133	-4	-1.2	0	0	0
ENSG00000169359	SLC33A1	solute carrier family 33 (acetyl-CoA transporter), member 1	Golgi membrane|endoplasmic reticulum membrane|integral component of plasma membrane|membrane|	transport|cell death|acetyl-CoA transport|acetyl-CoA transport|transmembrane transport|	acetyl-CoA transporter activity|	10	-1.1	4.02	10	-0.8	8.25	-0.9	11.6	0.0133	-1.6	-0.5	0	0	0
ENSG00000268412	AC013449.1	N/A	None	None	None	10	0.2	0.0186	10	-0.9	12.8	-0.8	11.6	0.0133	-1.6	-0.4	0	0	0
ENSG00000171953	ATPAF2	ATP synthase mitochondrial F1 complex assembly factor 2	mitochondrion|nuclear speck|	proton-transporting ATP synthase complex assembly|	protein binding|	10	-0.5	2.42	10	-1.6	11.3	-1	11.6	0.0133	-2.4	-0.5	0	0	0
ENSG00000131732	ZCCHC9	zinc finger, CCHC domain containing 9	None	negative regulation of phosphatase activity|	zinc ion binding|poly(A) RNA binding|	10	-2.5	2.42	10	1.4	13.7	1.3	11.5	0.0135	0.5	2.9	0	0	0
ENSG00000213853	EMP2	epithelial membrane protein 2	integral component of membrane|apical plasma membrane|	positive regulation of cell-matrix adhesion|cell proliferation|positive regulation of integrin-mediated signaling pathway|	integrin binding|	10	1.8	7.24	10	1.8	4.67	1.8	11.5	0.0135	1	3.5	0	0	0
ENSG00000012124	CD22	CD22 molecule	integral component of plasma membrane|external side of plasma membrane|extracellular vesicular exosome|	cell adhesion|	protein binding|	9	-1.3	7.81	9	-0.9	4.54	-1.1	11.5	0.0135	-2.2	-0.5	0	0	0
ENSG00000159388	BTG2	BTG family, member 2	extracellular vesicular exosome|	DNA repair|transcription, DNA-templated|protein methylation|cellular response to DNA damage stimulus|negative regulation of cell proliferation|associative learning|response to mechanical stimulus|anterior/posterior pattern specification|response to organic cyclic compound|negative regulation of translation|dentate gyrus development|central nervous system neuron development|neuron projection devel…	RNA polymerase II core promoter proximal region sequence-specific DNA binding transcription factor activity involved in positive regulation of transcription|protein binding|	10	-0.9	1.02	10	-0.7	10.9	-0.7	11.5	0.0135	-1.4	-0.3	0	0	0
ENSG00000138439	FAM117B	family with sequence similarity 117, member B	None	None	None	9	1.4	3.18	9	0.7	9.54	0.8	11.5	0.0135	0.4	1.9	0	0	0
ENSG00000140854	KATNB1	katanin p80 (WD repeat containing) subunit B 1	spindle pole|nucleus|cytoplasm|centrosome|microtubule|katanin complex|katanin complex|membrane|axon|growth cone|midbody|neuronal cell body|	ATP catabolic process|protein targeting|negative regulation of microtubule depolymerization|mitotic chromosome movement towards spindle pole|positive regulation of cell death|positive regulation of neuron projection development|positive regulation of microtubule depolymerization|microtubule severing|	microtubule binding|microtubule-severing ATPase activity|dynein binding|protein heterodimerization activity|	10	-0.4	0.0464	10	-1.2	11.9	-1.2	11.5	0.0135	-2.3	-0.5	0	0	0
ENSG00000242028	HYPK	huntingtin interacting protein K	nucleus|cytoplasm|	None	None	9	1.1	3.24	8	1.1	8.59	1.1	11.5	0.0135	0.4	2.5	0	0	0
ENSG00000153044	CENPH	centromere protein H	kinetochore|kinetochore|kinetochore|condensed chromosome kinetochore|nucleus|nucleoplasm|cytosol|	mitotic cell cycle|nucleosome assembly|centromere-specific nucleosome assembly|kinetochore assembly|kinetochore organization|	protein binding|kinetochore binding|	10	-1.5	7.12	10	-0.9	5.79	-1	11.5	0.0135	-2.1	-0.4	0	0	0
ENSG00000181323	SPEM1	spermatid maturation 1	cytoplasm|integral component of membrane|	multicellular organismal development|spermatogenesis|cell differentiation|	None	10	-0.3	0.545	10	-1.5	13.6	-1.4	11.5	0.0135	-2.7	-0.8	0	0	0
ENSG00000172650	AGAP5	ArfGAP with GTPase domain, ankyrin repeat and PH domain 5	None	regulation of ARF GTPase activity|positive regulation of GTPase activity|	ARF GTPase activator activity|zinc ion binding|	9	-1.8	3.5	9	-1.8	8.4	-1.8	11.5	0.0135	-3.5	-1.1	0	0	0
ENSG00000214367	HAUS3	HAUS augmin-like complex, subunit 3	cytoplasm|centrosome|spindle|microtubule|HAUS complex|	mitotic nuclear division|spindle assembly|centrosome organization|	molecular_function|	9	0.6	1.15	9	-1.3	12.4	-1.3	11.5	0.0135	-2	-0.4	0	0	0
ENSG00000151615	POU4F2	POU class 4 homeobox 2	nucleus|nucleus|nuclear speck|	negative regulation of transcription from RNA polymerase II promoter|MAPK cascade|transcription, DNA-templated|axon guidance|sensory perception of sound|neuron differentiation|intracellular estrogen receptor signaling pathway|retinal ganglion cell axon guidance|positive regulation of cell differentiation|positive regulation of transcription from RNA polymerase II promoter|axon extension|neuromusc…	RNA polymerase II core promoter proximal region sequence-specific DNA binding|RNA polymerase II core promoter proximal region sequence-specific DNA binding transcription factor activity involved in positive regulation of transcription|RNA polymerase II core promoter proximal region sequence-specific DNA binding transcription factor activity involved in negative regulation of transcription|chromat…	10	-1.7	8.47	10	-1.1	5.04	-1.2	11.5	0.0135	-3	-0.6	0	0	0
ENSG00000182816	KRTAP13-2	keratin associated protein 13-2	intermediate filament|	None	None	10	-1	3.19	10	-0.8	8.72	-0.9	11.5	0.0135	-1.8	-0.4	0	0	0
ENSG00000143436	MRPL9	mitochondrial ribosomal protein L9	mitochondrion|mitochondrial ribosome|	translation|	structural constituent of ribosome|poly(A) RNA binding|	9	-3.2	5.95	9	-0.7	7.83	-0.7	11.4	0.0138	-3.5	-0.3	0	0	0
ENSG00000154813	DPH3	diphthamide biosynthesis 3	nucleus|cytoplasm|	peptidyl-diphthamide biosynthetic process from peptidyl-histidine|peptidyl-diphthamide biosynthetic process from peptidyl-histidine|negative regulation of protein secretion|positive regulation of binding|	protein binding|metal ion binding|	7	1.5	5.01	6	1	7.24	1.1	11.4	0.0138	0.5	2.8	0	0	0
ENSG00000226104	AC011475.1	N/A	None	None	None	2	0.9	0.608	2	-1.8	12.3	-1.8	11.4	0.0138	-3	-1	0	0	0
ENSG00000273025	CELF6	CUGBP, Elav-like family member 6	nucleus|cytoplasm|	regulation of alternative mRNA splicing, via spliceosome|mRNA processing|	nucleotide binding|RNA binding|	4	1.9	2.41	4	2.4	9.74	2.3	11.4	0.0138	1.8	4	0	0	0
ENSG00000213585	VDAC1	voltage-dependent anion channel 1	nucleus|mitochondrion|mitochondrial outer membrane|mitochondrial inner membrane|plasma membrane|membrane|mitochondrial nucleoid|pore complex|extracellular vesicular exosome|	behavioral fear response|anion transport|apoptotic process|neuron-neuron synaptic transmission|learning|viral process|epithelial cell differentiation|regulation of anion transport|transmembrane transport|	protein binding|voltage-gated anion channel activity|voltage-gated anion channel activity|porin activity|	9	-1.5	10.5	9	-0.7	3.9	-1.3	11.4	0.0138	-2.4	-0.5	0	0	0
ENSG00000152601	MBNL1	muscleblind-like splicing regulator 1	nucleus|cytoplasm|cytoplasmic stress granule|	alternative mRNA splicing, via spliceosome|regulation of alternative mRNA splicing, via spliceosome|in utero embryonic development|mRNA splice site selection|nervous system development|skeletal muscle tissue development|RNA splicing|embryonic limb morphogenesis|regulation of RNA splicing|myoblast differentiation|	RNA binding|double-stranded RNA binding|protein binding|poly(A) RNA binding|metal ion binding|	10	1.3	0.628	10	1.4	11	1.4	11.4	0.0138	0.7	2.8	0	0	0
ENSG00000172156	CCL11	chemokine (C-C motif) ligand 11	extracellular region|extracellular region|extracellular space|	positive regulation of endothelial cell proliferation|chronic inflammatory response|mast cell chemotaxis|protein phosphorylation|cellular calcium ion homeostasis|chemotaxis|inflammatory response|immune response|cytoskeleton organization|actin filament organization|cell adhesion|signal transduction|regulation of cell shape|response to radiation|response to virus|positive regulation of cell migrati…	protein binding|chemokine activity|	10	-1.2	7.38	10	-1.7	4.62	-1.6	11.4	0.0138	-2.7	-0.5	0	0	0
ENSG00000187713	TMEM203	transmembrane protein 203	integral component of membrane|	None	None	9	-0.6	2.06	9	-2.2	12.3	-2.1	11.4	0.0138	-3.4	-0.6	0	0	0
ENSG00000068079	IFI35	interferon-induced protein 35	nucleus|cytosol|	cytokine-mediated signaling pathway|type I interferon signaling pathway|	protein binding|	10	1.7	13.5	10	-0.9	1.69	1.6	11.4	0.0138	0.5	3.4	0	0	0
ENSG00000179151	EDC3	enhancer of mRNA decapping 3	cytoplasmic mRNA processing body|cytosol|membrane|	nuclear-transcribed mRNA catabolic process, deadenylation-dependent decay|gene expression|RNA metabolic process|mRNA metabolic process|exonucleolytic nuclear-transcribed mRNA catabolic process involved in deadenylation-dependent decay|	RNA binding|protein binding|identical protein binding|	10	-1.4	6.38	9	-0.8	6.1	-1	11.4	0.0138	-2	-0.4	0	0	0
ENSG00000129295	LRRC6	leucine rich repeat containing 6	cytoplasm|cytoplasm|cilium|	cilium movement|male gonad development|sperm motility|outer dynein arm assembly|inner dynein arm assembly|motile cilium assembly|epithelial cilium movement involved in determination of left/right asymmetry|reproductive system development|	molecular_function|protein binding|	10	1.8	2.52	10	1.7	9.22	1.7	11.4	0.0138	0.7	3.4	0	0	0
ENSG00000196793	ZNF239	zinc finger protein 239	nucleus|	transcription, DNA-templated|regulation of transcription, DNA-templated|	DNA binding|sequence-specific DNA binding transcription factor activity|RNA binding|metal ion binding|	10	-1.1	5.36	10	-1.1	6.43	-1.1	11.4	0.0138	-2.5	-0.6	0	0	0
ENSG00000234776	C11ORF94	chromosome 11 open reading frame 94	extracellular region|	None	None	10	3.1	4.55	10	2.2	8	2.6	11.3	0.0141	1.5	5.4	0	0	0
ENSG00000107779	BMPR1A	bone morphogenetic protein receptor, type IA	plasma membrane|plasma membrane|caveola|integral component of membrane|dendrite|neuronal cell body|	in utero embryonic development|mesoderm formation|somitogenesis|Mullerian duct regression|positive regulation of mesenchymal cell proliferation|endocardial cushion formation|transcription from RNA polymerase II promoter|protein phosphorylation|immune response|transforming growth factor beta receptor signaling pathway|ectoderm development|dorsal/ventral axis specification|positive regulation of pa…	sequence-specific DNA binding RNA polymerase II transcription factor activity|protein serine/threonine kinase activity|transmembrane receptor protein serine/threonine kinase activity|receptor signaling protein serine/threonine kinase activity|transforming growth factor beta-activated receptor activity|protein binding|ATP binding|protein homodimerization activity|SMAD binding|metal ion binding|	10	-0.8	1.83	10	1.8	11.7	1.7	11.3	0.0141	0.9	3	0	0	0
ENSG00000089006	SNX5	sorting nexin 5	ruffle|phagocytic cup|cytoplasmic vesicle membrane|extrinsic component of cytoplasmic side of plasma membrane|extrinsic component of endosome membrane|early endosome membrane|macropinocytic cup|	intracellular protein transport|pinocytosis|	phosphatidylinositol binding|phosphatidylinositol binding|	10	-0.6	1.61	10	-1.3	10.6	-1.2	11.3	0.0141	-2.1	-0.4	0	0	0
ENSG00000153094	BCL2L11	BCL2-like 11 (apoptosis facilitator)	mitochondrial outer membrane|cytosol|cytosol|microtubule|endomembrane system|extrinsic component of membrane|BIM-BCL-xl complex|BIM-BCL-2 complex|	in utero embryonic development|B cell homeostasis|B cell apoptotic process|kidney development|myeloid cell homeostasis|apoptotic process|activation of cysteine-type endopeptidase activity involved in apoptotic process|cell-matrix adhesion|spermatogenesis|brain development|male gonad development|intrinsic apoptotic signaling pathway in response to DNA damage|mammary gland development|positive regu…	protein binding|microtubule binding|microtubule binding|	10	0.9	2.52	10	0.6	9.44	0.6	11.3	0.0141	0.3	1.3	0	0	0
ENSG00000171634	BPTF	bromodomain PHD finger transcription factor	nucleus|nucleolus|cytoplasm|microtubule cytoskeleton|NURF complex|	negative regulation of transcription from RNA polymerase II promoter|embryonic placenta development|ATP catabolic process|chromatin remodeling|transcription, DNA-templated|regulation of transcription, DNA-templated|brain development|endoderm development|anterior/posterior pattern specification|positive regulation of transcription, DNA-templated|	protein binding|DNA-dependent ATPase activity|transcription factor binding|zinc ion binding|sequence-specific DNA binding|sequence-specific DNA binding|	9	0	0	9	-2	14	-2	11.3	0.0141	-3.7	-1	0	0	0
ENSG00000179922	ZNF784	zinc finger protein 784	nucleus|	transcription, DNA-templated|regulation of transcription, DNA-templated|	DNA binding|metal ion binding|	10	-1.3	1.28	10	-1.3	10.4	-1.3	11.3	0.0141	-2.4	-0.6	0	0	0
ENSG00000172345	STARD5	StAR-related lipid transfer (START) domain containing 5	cytosol|	C21-steroid hormone biosynthetic process|lipid transport|steroid metabolic process|small molecule metabolic process|	lipid binding|	10	0.8	1.73	10	0.8	9.84	0.8	11.3	0.0141	0.4	1.7	0	0	0
ENSG00000167747	C19ORF48	chromosome 19 open reading frame 48	None	None	None	10	0.8	4.76	10	1.1	7.12	1	11.3	0.0141	0.4	1.7	0	0	0
ENSG00000104973	MED25	mediator complex subunit 25	nucleoplasm|	negative regulation of transcription from RNA polymerase II promoter|transcription initiation from RNA polymerase II promoter|cell death|gene expression|positive regulation of chromatin binding|positive regulation of transcription from RNA polymerase II promoter|negative regulation of fibroblast proliferation|positive regulation of cell cycle arrest|positive regulation of mediator complex assembl…	protein binding|transcription factor binding|retinoic acid receptor binding|retinoid X receptor binding|	8	-2.1	0.349	10	-1	12.1	-1	11.3	0.0141	-2.4	-0.4	0	0	0
ENSG00000266076	CTD-2535L24.2	N/A	None	None	None	5	1.3	4.37	5	1.2	7.34	1.2	11.3	0.0141	0.5	2.5	0	0	0
ENSG00000080819	CPOX	coproporphyrinogen oxidase	mitochondrion|mitochondrial inner membrane|mitochondrial intermembrane space|	porphyrin-containing compound metabolic process|protoporphyrinogen IX biosynthetic process|heme biosynthetic process|response to iron ion|response to lead ion|response to insecticide|small molecule metabolic process|response to arsenic-containing substance|response to methylmercury|oxidation-reduction process|	coproporphyrinogen oxidase activity|structural constituent of eye lens|protein homodimerization activity|	9	-1.2	6.43	9	-1.5	5.6	-1.3	11.3	0.0141	-2.4	-0.6	0	0	0
ENSG00000213619	NDUFS3	NADH dehydrogenase (ubiquinone) Fe-S protein 3, 30kDa (NADH-coenzyme Q reductase)	nucleus|mitochondrion|mitochondrion|mitochondrial inner membrane|mitochondrial respiratory chain complex I|mitochondrial respiratory chain complex I|mitochondrial membrane|	mitochondrial electron transport, NADH to ubiquinone|substantia nigra development|respiratory electron transport chain|negative regulation of cell growth|cellular metabolic process|small molecule metabolic process|reactive oxygen species metabolic process|negative regulation of intrinsic apoptotic signaling pathway|	NADH dehydrogenase activity|protein binding|NADH dehydrogenase (ubiquinone) activity|electron carrier activity|	10	-1.1	5.71	10	-2	7.43	-1.7	11.2	0.0144	-2.7	-0.5	0	0	0
ENSG00000170584	NUDCD2	NudC domain containing 2	condensed chromosome kinetochore|spindle pole|intracellular|cytoplasm|microtubule organizing center|microtubule cytoskeleton|extracellular vesicular exosome|	None	protein binding|	10	-0.6	1.51	9	-0.7	10	-0.7	11.2	0.0144	-1.4	-0.3	0	0	0
ENSG00000116489	CAPZA1	capping protein (actin filament) muscle Z-line, alpha 1	extracellular region|cytosol|cytoskeleton|F-actin capping protein complex|actin cytoskeleton|extracellular vesicular exosome|WASH complex|	protein complex assembly|cellular component movement|blood coagulation|actin cytoskeleton organization|innate immune response|actin filament capping|	actin binding|protein binding|	9	-1.5	7.93	9	-1.4	3.73	-1.4	11.2	0.0144	-2.8	-0.5	0	0	0
ENSG00000122687	FTSJ2	FtsJ RNA methyltransferase homolog 2 (E. coli)	nucleolus|mitochondrion|	rRNA processing|cell proliferation|rRNA methylation|	rRNA (uridine-2'-O-)-methyltransferase activity|	10	-0.8	5.51	9	-1.1	6.26	-0.9	11.2	0.0144	-1.9	-0.3	0	0	0
ENSG00000229729	RP11-159G9.5	N/A	None	None	None	10	-2.8	6.16	10	-2.2	5.95	-2.2	11.2	0.0144	-5	-0.8	0	0	0
ENSG00000186480	INSIG1	insulin induced gene 1	endoplasmic reticulum|endoplasmic reticulum membrane|SREBP-SCAP-Insig complex|	triglyceride metabolic process|cholesterol biosynthetic process|metabolic process|cell proliferation|negative regulation of steroid biosynthetic process|SREBP signaling pathway|inner ear morphogenesis|middle ear morphogenesis|small molecule metabolic process|negative regulation of fat cell differentiation|negative regulation of fatty acid biosynthetic process|palate development|cranial suture mor…	protein binding|	10	-1.3	5.7	10	-0.9	6.12	-1.2	11.2	0.0144	-2	-0.4	0	0	0
ENSG00000145592	RPL37	ribosomal protein L37	cytosol|cytosolic large ribosomal subunit|cytosolic large ribosomal subunit|	nuclear-transcribed mRNA catabolic process, nonsense-mediated decay|translation|translation|translational initiation|translational elongation|translational termination|SRP-dependent cotranslational protein targeting to membrane|gene expression|viral process|RNA metabolic process|mRNA metabolic process|viral life cycle|viral transcription|cellular protein metabolic process|	RNA binding|structural constituent of ribosome|structural constituent of ribosome|rRNA binding|metal ion binding|	8	1	2.84	7	1	8.73	1	11.2	0.0144	0.5	1.8	0	0	0
ENSG00000143412	ANXA9	annexin A9	cytosol|cell surface|extracellular vesicular exosome|	synaptic transmission|single organismal cell-cell adhesion|	phosphatidylserine binding|calcium ion binding|protein binding|phospholipid binding|calcium-dependent phospholipid binding|acetylcholine receptor activity|protein homodimerization activity|	10	-1.2	6.18	10	-1.1	5.54	-1.2	11.2	0.0144	-2.1	-0.6	0	0	0
ENSG00000155846	PPARGC1B	peroxisome proliferator-activated receptor gamma, coactivator 1 beta	nucleus|nucleoplasm|mitochondrion|mediator complex|	ossification|regulation of transcription, DNA-templated|transcription from RNA polymerase II promoter|transcription from mitochondrial promoter|actin filament organization|positive regulation of alkaline phosphatase activity|intracellular estrogen receptor signaling pathway|cellular response to reactive oxygen species|positive regulation of phosphorylation|cellular lipid metabolic process|small m…	nucleotide binding|RNA polymerase II transcription cofactor activity|RNA binding|estrogen receptor binding|ligand-dependent nuclear receptor transcription coactivator activity|receptor activator activity|AF-2 domain binding|	10	-0.8	1.96	10	-0.6	9.65	-0.6	11.2	0.0144	-1.5	-0.3	0	0	0
ENSG00000103245	NARFL	nuclear prelamin A recognition factor-like	CIA complex|	response to hypoxia|regulation of transcription, DNA-templated|iron-sulfur cluster assembly|oxygen homeostasis|small molecule metabolic process|	metal ion binding|4 iron, 4 sulfur cluster binding|	9	-2.3	8.42	7	1.3	12	1.2	11.2	0.0144	-2.6	3	0	0	0
ENSG00000122257	RBBP6	retinoblastoma binding protein 6	nucleus|chromosome|cytoplasm|microtubule organizing center|	in utero embryonic development|multicellular organism growth|protein ubiquitination involved in ubiquitin-dependent protein catabolic process|embryonic organ development|somite development|	ubiquitin-protein transferase activity|protein binding|zinc ion binding|ligase activity|poly(A) RNA binding|	9	1.3	6.91	9	1.1	4.83	1.2	11.2	0.0144	0.4	2.7	0	0	0
ENSG00000146918	NCAPG2	non-SMC condensin II complex, subunit G2	nucleus|nucleoplasm|membrane|	mitotic cell cycle|inner cell mass cell proliferation|mitotic nuclear division|chromosome condensation|	protein binding|methylated histone binding|	10	-1.4	5.95	10	-1.9	6.28	-1.7	11.2	0.0144	-3	-0.5	0	0	0
ENSG00000170464	DNAJC18	DnaJ (Hsp40) homolog, subfamily C, member 18	integral component of membrane|	None	None	10	-1.1	1.99	10	-1.3	9.6	-1.3	11.2	0.0144	-3	1.5	0	0	0
ENSG00000148308	GTF3C5	general transcription factor IIIC, polypeptide 5, 63kDa	transcription factor TFIIIC complex|nucleoplasm|	transcription, DNA-templated|transcription from RNA polymerase III promoter|transcription from RNA polymerase III promoter|gene expression|skeletal muscle cell differentiation|5S class rRNA transcription from RNA polymerase III type 1 promoter|tRNA transcription from RNA polymerase III promoter|	DNA binding|protein binding|	8	1.2	5.59	8	1.2	5.9	1.2	11.1	0.0147	0.6	2.4	0	0	0
ENSG00000104872	PIH1D1	PIH1 domain containing 1	pre-snoRNP complex|	box C/D snoRNP assembly|epithelial cell differentiation|	None	10	-2.1	11	10	-0.9	3.63	-1.7	11.1	0.0147	-3.4	-0.5	0	0	0
ENSG00000120699	EXOSC8	exosome component 8	exosome (RNase complex)|nucleus|nucleolus|cytoplasm|cytosol|	nuclear-transcribed mRNA catabolic process, deadenylation-dependent decay|rRNA processing|biological_process|gene expression|RNA metabolic process|mRNA metabolic process|exonucleolytic nuclear-transcribed mRNA catabolic process involved in deadenylation-dependent decay|	protein binding|AU-rich element binding|	10	1.9	7.11	8	1.4	4.83	1.5	11.1	0.0147	0.6	3.4	0	0	0
ENSG00000112306	RPS12	ribosomal protein S12	cytosol|membrane|cytosolic small ribosomal subunit|cytosolic small ribosomal subunit|	nuclear-transcribed mRNA catabolic process, nonsense-mediated decay|translation|translation|translation|translational initiation|translational elongation|translational termination|SRP-dependent cotranslational protein targeting to membrane|gene expression|viral process|RNA metabolic process|mRNA metabolic process|viral life cycle|viral transcription|cellular protein metabolic process|	structural constituent of ribosome|poly(A) RNA binding|	8	1.6	4.55	7	1.1	7.33	1.2	11.1	0.0147	0.7	2.7	0	0	0
ENSG00000067225	PKM	pyruvate kinase, muscle	nucleus|cytoplasm|mitochondrion|cytosol|cytosol|plasma membrane|cilium|extracellular vesicular exosome|	carbohydrate metabolic process|glucose metabolic process|glycolytic process|glycolytic process|programmed cell death|phosphorylation|small molecule metabolic process|	magnesium ion binding|pyruvate kinase activity|protein binding|ATP binding|MHC class II protein complex binding|potassium ion binding|poly(A) RNA binding|	9	-1.7	6.79	10	-1.2	5.02	-1.4	11.1	0.0147	-2.7	-0.5	0	0	0
ENSG00000131931	THAP1	THAP domain containing, apoptosis associated protein 1	nucleus|PML body|	endothelial cell proliferation|transcription, DNA-templated|regulation of transcription, DNA-templated|cell cycle|regulation of mitotic cell cycle|	protein binding|zinc ion binding|sequence-specific DNA binding|sequence-specific DNA binding|	10	2.4	7.62	10	1.2	3.97	1.3	11.1	0.0147	0.4	3.8	0	0	0
ENSG00000115317	HTRA2	HtrA serine peptidase 2	chromatin|nucleus|mitochondrion|mitochondrion|mitochondrion|mitochondrial intermembrane space|endoplasmic reticulum|endoplasmic reticulum membrane|cytosol|cytoskeleton|cytoplasmic side of plasma membrane|membrane|mitochondrial membrane|CD40 receptor complex|	proteolysis|proteolysis|ceramide metabolic process|mitochondrion organization|adult walking behavior|intrinsic apoptotic signaling pathway in response to DNA damage|response to herbicide|positive regulation of cell death|protein autoprocessing|pentacyclic triterpenoid metabolic process|forebrain development|cellular response to heat|regulation of multicellular organism growth|positive regulation …	serine-type endopeptidase activity|serine-type endopeptidase activity|protein binding|peptidase activity|serine-type peptidase activity|serine-type peptidase activity|unfolded protein binding|	10	-0.7	2.71	10	-0.8	8.82	-0.8	11.1	0.0147	-1.8	-0.3	0	0	0
ENSG00000130227	XPO7	exportin 7	nucleus|nuclear pore|cytoplasm|	protein export from nucleus|mRNA transport|	nuclear export signal receptor activity|Ran GTPase binding|	9	-1.8	13.6	9	-0.1	0.427	-1.7	11.1	0.0147	-3.7	-0.6	0	0	0
ENSG00000214078	CPNE1	copine I	extracellular vesicular exosome|	lipid metabolic process|vesicle-mediated transport|	phosphatidylserine binding|transporter activity|calcium-dependent phospholipid binding|	10	-0.7	0.463	10	-2.1	12.1	-1.9	11.1	0.0147	-3.8	-1.2	0	0	0
ENSG00000152684	PELO	pelota homolog (Drosophila)	nucleus|cytoplasm|	cell cycle|cell proliferation|chromosome organization|cell division|nuclear-transcribed mRNA catabolic process, non-stop decay|nuclear-transcribed mRNA catabolic process, no-go decay|RNA surveillance|nucleic acid phosphodiester bond hydrolysis|	endonuclease activity|metal ion binding|	10	0.5	0.77	10	-1.6	12.3	-1.6	11.1	0.0147	-2.8	-0.7	0	0	0
ENSG00000117481	NSUN4	NOP2/Sun domain family, member 4	mitochondrial large ribosomal subunit|	rRNA processing|methylation|	RNA binding|protein binding|methyltransferase activity|	9	-0.8	2.7	9	-1.5	9.29	-1.4	11.1	0.0147	-2.4	-0.5	0	0	0
ENSG00000168427	KLHL30	kelch-like family member 30	None	None	None	10	-0.3	0.343	10	-0.7	11.2	-0.7	11	0.015	-1.6	-0.3	0	0	0
ENSG00000073584	SMARCE1	SWI/SNF related, matrix associated, actin dependent regulator of chromatin, subfamily e, member 1	nuclear chromosome|nuclear chromatin|nucleus|SWI/SNF complex|transcriptional repressor complex|protein complex|npBAF complex|nBAF complex|	nucleosome disassembly|chromatin remodeling|regulation of transcription from RNA polymerase II promoter|nervous system development|metabolic process|ATP-dependent chromatin remodeling|negative regulation of transcription, DNA-templated|	RNA polymerase II core promoter proximal region sequence-specific DNA binding|RNA polymerase II distal enhancer sequence-specific DNA binding|chromatin binding|transcription coactivator activity|RNA binding|protein binding|N-acetyltransferase activity|ligand-dependent nuclear receptor binding|nucleosomal DNA binding|protein N-terminus binding|	10	1	1.79	9	1.9	10.9	1.8	11	0.015	0.8	3.5	0	0	0
ENSG00000154639	CXADR	coxsackie virus and adenovirus receptor	acrosomal vesicle|extracellular region|extracellular space|nucleus|plasma membrane|plasma membrane|integral component of plasma membrane|cell-cell junction|adherens junction|tight junction|intercalated disc|intercalated disc|basolateral plasma membrane|apicolateral plasma membrane|cell junction|filopodium|growth cone|neuromuscular junction|neuron projection|protein complex|cell body|membrane raft|	mitochondrion organization|heterophilic cell-cell adhesion|heart development|blood coagulation|germ cell migration|response to virus|epithelial structure maintenance|viral process|single organismal cell-cell adhesion|neutrophil chemotaxis|actin cytoskeleton reorganization|homotypic cell-cell adhesion|cell-cell junction organization|gamma-delta T cell activation|cardiac muscle fiber development|re…	virus receptor activity|receptor binding|integrin binding|protein binding|beta-catenin binding|PDZ domain binding|identical protein binding|cell adhesion molecule binding|connexin binding|	10	-2.2	2.32	10	-0.9	10.1	-1.1	11	0.015	-2.6	-0.4	0	0	0
ENSG00000170788	DYDC1	DPY30 domain containing 1	None	None	None	10	2	13.4	10	0.4	2.79	2	10.9	0.0154	0.5	3.9	0	0	0
ENSG00000105793	GTPBP10	GTP-binding protein 10 (putative)	chromosome|nucleolus|mitochondrion|	GTP catabolic process|ribosome biogenesis|	magnesium ion binding|GTPase activity|GTP binding|poly(A) RNA binding|	10	-1.5	7.54	9	-0.5	3.95	-1.3	10.9	0.0154	-3	-0.3	0	0	0
ENSG00000159346	ADIPOR1	adiponectin receptor 1	plasma membrane|membrane|integral component of membrane|	hormone-mediated signaling pathway|fatty acid oxidation|negative regulation of cell growth|leptin-mediated signaling pathway|adiponectin-activated signaling pathway|positive regulation of JAK-STAT cascade|positive regulation of insulin receptor signaling pathway|	receptor activity|protein kinase binding|hormone binding|identical protein binding|protein heterodimerization activity|	10	0.3	0.308	10	0.9	11.2	0.9	10.9	0.0154	0.3	1.9	0	0	0
ENSG00000099308	MAST3	microtubule associated serine/threonine kinase 3	None	protein phosphorylation|	magnesium ion binding|protein serine/threonine kinase activity|protein binding|ATP binding|	10	2.5	2.15	10	-0.9	12.1	-0.9	10.9	0.0154	-1.8	-0.5	0	0	0
ENSG00000155561	NUP205	nucleoporin 205kDa	nuclear envelope|nuclear pore|nuclear pore|membrane|nuclear membrane|nuclear periphery|	protein import into nucleus, docking|mitotic cell cycle|carbohydrate metabolic process|nucleocytoplasmic transport|mitotic nuclear envelope disassembly|hexose transport|regulation of glucose transport|glucose transport|viral process|cytokine-mediated signaling pathway|small molecule metabolic process|mRNA transport|nuclear pore complex assembly|transmembrane transport|	protein binding|structural constituent of nuclear pore|	10	-2.2	8.46	10	-0.9	6.28	-1.8	10.9	0.0154	-3.5	-0.6	0	0	0
ENSG00000143761	ARF1	ADP-ribosylation factor 1	Golgi membrane|cytosol|plasma membrane|postsynaptic density|sarcomere|cell junction|neuron projection|postsynaptic membrane|perinuclear region of cytoplasm|extracellular vesicular exosome|	regulation of receptor internalization|GTP catabolic process|phospholipid metabolic process|phosphatidylinositol biosynthetic process|cellular copper ion homeostasis|retrograde vesicle-mediated transport, Golgi to ER|post-Golgi vesicle-mediated transport|small GTPase mediated signal transduction|protein transport|viral process|antigen processing and presentation of exogenous peptide antigen via M…	GTPase activity|receptor signaling protein activity|protein binding|GTP binding|poly(A) RNA binding|	10	-1.1	3.42	9	-1.3	7.85	-1.2	10.9	0.0154	-2.2	-0.3	0	0	0
ENSG00000141522	ARHGDIA	Rho GDP dissociation inhibitor (GDI) alpha	immunological synapse|cytosol|cytoskeleton|extracellular vesicular exosome|	cellular component movement|negative regulation of cell adhesion|small GTPase mediated signal transduction|Rho protein signal transduction|regulation of protein localization|negative regulation of apoptotic process|positive regulation of GTPase activity|neurotrophin TRK receptor signaling pathway|regulation of axonogenesis|negative regulation of axonogenesis|positive regulation of axonogenesis|re…	Rho GDP-dissociation inhibitor activity|GTPase activator activity|protein binding|	9	1	4.55	9	0.5	7.59	0.8	10.9	0.0154	0.3	1.8	0	0	0
ENSG00000158525	CPA5	carboxypeptidase A5	extracellular region|	proteolysis|	metallocarboxypeptidase activity|zinc ion binding|	10	-1.7	6.9	10	-0.5	4.67	-1.6	10.9	0.0154	-3.2	-0.4	0	0	0
ENSG00000159251	ACTC1	actin, alpha, cardiac muscle 1	extracellular space|cytoplasm|cytosol|actin filament|membrane|sarcomere|I band|actomyosin, actin portion|extracellular vesicular exosome|blood microparticle|	ATP catabolic process|apoptotic process|actin filament-based movement|muscle filament sliding|skeletal muscle thin filament assembly|actomyosin structure organization|actin-myosin filament sliding|response to drug|negative regulation of apoptotic process|response to ethanol|cardiac myofibril assembly|cardiac muscle tissue morphogenesis|heart contraction|cardiac muscle contraction|	ATP binding|ATPase activity|myosin binding|myosin binding|	10	-3.2	6.82	10	-1.9	6.44	-2	10.9	0.0154	-5.3	-1.1	0	0	0
ENSG00000162604	TM2D1	TM2 domain containing 1	integral component of membrane|	apoptotic process|	None	10	-0.9	3.21	10	-0.8	8.09	-0.8	10.9	0.0154	-2.1	-0.4	0	0	0
ENSG00000145912	NHP2	NHP2 ribonucleoprotein	nucleus|small nucleolar ribonucleoprotein complex|cytoplasm|Cajal body|	rRNA pseudouridine synthesis|	snoRNA binding|poly(A) RNA binding|	10	1.1	6.05	10	0.7	6.17	0.7	10.9	0.0154	0.3	1.9	0	0	0
ENSG00000198830	HMGN2	high mobility group nucleosomal binding domain 2	chromatin|nucleus|cytoplasm|	None	nucleosomal DNA binding|poly(A) RNA binding|	8	2.7	11.6	8	0.7	5.19	2.6	10.9	0.0154	0.7	4.5	0	0	0
ENSG00000127184	COX7C	cytochrome c oxidase subunit VIIc	mitochondrion|mitochondrial inner membrane|integral component of membrane|	generation of precursor metabolites and energy|respiratory electron transport chain|cellular metabolic process|small molecule metabolic process|hydrogen ion transmembrane transport|	cytochrome-c oxidase activity|	8	-0.8	2.39	7	1.3	13	1.3	10.9	0.0154	0.8	2	0	0	0
ENSG00000015479	MATR3	matrin 3	nucleus|nuclear inner membrane|membrane|nuclear matrix|	None	nucleotide binding|structural molecule activity|protein binding|zinc ion binding|poly(A) RNA binding|	10	0.7	1.38	10	-0.8	12.3	-0.8	10.9	0.0154	-1.6	-0.4	0	0	0
ENSG00000066084	DIP2B	DIP2 disco-interacting protein 2 homolog B (Drosophila)	nucleus|cytoplasm|membrane|extracellular vesicular exosome|	biological_process|metabolic process|	molecular_function|catalytic activity|transcription factor binding|	10	-1	2.13	10	-0.8	9.16	-0.9	10.9	0.0154	-1.9	-0.4	0	0	0
ENSG00000152253	SPC25	SPC25, NDC80 kinetochore complex component	condensed chromosome kinetochore|nucleus|cytosol|Ndc80 complex|	mitotic cell cycle|mitotic spindle organization|chromosome segregation|mitotic nuclear division|	protein binding|	8	0.3	0.383	7	1.9	13.1	1.9	10.9	0.0154	0.8	3.8	0	0	0
ENSG00000198265	HELZ	helicase with zinc finger	nucleus|membrane|	metabolic process|	helicase activity|ATP binding|poly(A) RNA binding|metal ion binding|	10	1.1	5.18	10	0.5	7.53	0.6	10.8	0.0157	0.3	1.5	0	0	0
ENSG00000180316	PNPLA1	patatin-like phospholipase domain containing 1	cytoplasm|	lipid catabolic process|	hydrolase activity|	10	-0.3	0.524	10	-0.9	11.2	-0.9	10.8	0.0157	-1.7	-0.4	0	0	0
ENSG00000176386	CDC26	cell division cycle 26	nucleoplasm|anaphase-promoting complex|cytosol|	mitotic cell cycle|mitotic nuclear division|mitotic spindle assembly checkpoint|anaphase-promoting complex-dependent proteasomal ubiquitin-dependent protein catabolic process|negative regulation of ubiquitin-protein ligase activity involved in mitotic cell cycle|positive regulation of ubiquitin-protein ligase activity involved in mitotic cell cycle|regulation of ubiquitin-protein ligase activity …	protein binding|	8	-1	2.96	9	-1.1	8.22	-1.1	10.8	0.0157	-2.1	-0.4	0	0	0
ENSG00000170523	KRT83	keratin 83	extracellular space|keratin filament|	aging|epidermis development|hair cycle|	structural molecule activity|	10	-2	7.49	9	-0.8	5.49	-1.2	10.8	0.0157	-2.8	-0.4	0	0	0
ENSG00000111775	COX6A1	cytochrome c oxidase subunit VIa polypeptide 1	mitochondrial inner membrane|mitochondrial respiratory chain complex IV|	generation of precursor metabolites and energy|respiratory electron transport chain|cellular metabolic process|small molecule metabolic process|hydrogen ion transmembrane transport|	cytochrome-c oxidase activity|	10	-0.6	1.95	10	-2.2	10.3	-0.7	10.8	0.0157	-3.2	-0.3	0	0	0
ENSG00000137078	SIT1	signaling threshold regulating transmembrane adaptor 1	plasma membrane|integral component of plasma membrane|extracellular vesicular exosome|	immune system process|signal transduction|regulation of T cell activation|	protein binding|kinase binding|SH2 domain binding|	10	-0.7	1.27	10	-1.2	10.8	-1.2	10.8	0.0157	-2.3	-0.5	0	0	0
ENSG00000115593	SMYD1	SET and MYND domain containing 1	nucleus|cytoplasm|	chromatin remodeling|transcription, DNA-templated|heart development|positive regulation of myotube differentiation|histone lysine methylation|skeletal muscle cell differentiation|positive regulation of myoblast differentiation|negative regulation of transcription, DNA-templated|	DNA binding|transcription corepressor activity|protein binding|histone-lysine N-methyltransferase activity|metal ion binding|	10	-0.6	0.401	10	-0.8	10.8	-0.8	10.8	0.0157	-1.7	-0.4	0	0	0
ENSG00000167968	DNASE1L2	deoxyribonuclease I-like 2	extracellular region|cytoplasm|	DNA catabolic process, endonucleolytic|DNA metabolic process|	DNA binding|deoxyribonuclease activity|calcium ion binding|endodeoxyribonuclease activity, producing 5'-phosphomonoesters|	9	0.7	2.64	10	-2	12.6	-1.9	10.8	0.0157	-3.5	-0.9	0	0	0
ENSG00000120686	UFM1	ubiquitin-fold modifier 1	nucleus|cytoplasm|extracellular vesicular exosome|	response to endoplasmic reticulum stress|protein ufmylation|	None	9	-1.6	2.85	9	-1.1	8.76	-1.1	10.8	0.0157	-2.4	-0.4	0	0	0
ENSG00000164050	PLXNB1	plexin B1	semaphorin receptor complex|semaphorin receptor complex|extracellular region|intracellular|plasma membrane|integral component of plasma membrane|integral component of plasma membrane|	negative regulation of cell adhesion|signal transduction|axon guidance|regulation of cell shape|positive regulation of phosphatidylinositol 3-kinase signaling|cell migration|positive regulation of Rho GTPase activity|negative regulation of osteoblast proliferation|intracellular signal transduction|ossification involved in bone maturation|neuron projection morphogenesis|positive regulation of axon…	receptor activity|transmembrane signaling receptor activity|protein binding|semaphorin receptor activity|semaphorin receptor activity|semaphorin receptor binding|GTPase activating protein binding|	9	-1	3.69	9	-1.2	7.47	-1.1	10.8	0.0157	-2.2	-0.5	0	0	0
ENSG00000167863	ATP5H	ATP synthase, H+ transporting, mitochondrial Fo complex, subunit d	mitochondrial proton-transporting ATP synthase complex, coupling factor F(o)|mitochondrion|mitochondrial inner membrane|mitochondrial inner membrane|mitochondrial proton-transporting ATP synthase complex|extracellular vesicular exosome|	ATP catabolic process|respiratory electron transport chain|mitochondrial ATP synthesis coupled proton transport|mitochondrial ATP synthesis coupled proton transport|cellular metabolic process|small molecule metabolic process|	hydrogen ion transmembrane transporter activity|ATPase activity|transmembrane transporter activity|	10	-0.9	5.36	6	-0.8	5.97	-0.8	10.8	0.0157	-1.9	-0.4	0	0	0
ENSG00000140830	TXNL4B	thioredoxin-like 4B	spliceosomal complex|	mRNA processing|mitotic nuclear division|RNA splicing|	None	10	1.9	13.2	9	-1.1	1.89	1.9	10.8	0.0157	0.7	3.5	0	0	0
ENSG00000104081	BMF	Bcl2 modifying factor	acrosomal vesicle|mitochondrial outer membrane|cytosol|plasma membrane|myosin complex|	apoptotic process|positive regulation of protein homooligomerization|anoikis|positive regulation of release of cytochrome c from mitochondria|intrinsic apoptotic signaling pathway|positive regulation of protein insertion into mitochondrial membrane involved in apoptotic signaling pathway|negative regulation of apoptotic signaling pathway|positive regulation of intrinsic apoptotic signaling pathwa…	protein binding|	10	1.3	3.8	10	0.6	8.59	0.9	10.8	0.0157	0.3	1.8	0	0	0
ENSG00000267228	IER3IP1	immediate early response 3 interacting protein 1	endoplasmic reticulum|endoplasmic reticulum membrane|Golgi apparatus|membrane|integral component of membrane|	regulation of fibroblast apoptotic process|	None	9	-2	2.01	9	-0.8	9.25	-0.9	10.8	0.0157	-2.2	-0.4	0	0	0
ENSG00000161381	PLXDC1	plexin domain containing 1	extracellular region|extracellular space|intracellular|cytoplasm|plasma membrane|plasma membrane|tight junction|integral component of membrane|dendrite|neuronal cell body|receptor complex|	angiogenesis|spinal cord development|	receptor activity|protein binding|	10	-2.7	7.98	10	-1.4	5.56	-2.1	10.8	0.0157	-4.2	-0.9	0	0	0
ENSG00000122122	SASH3	SAM and SH3 domain containing 3	nucleus|cytoplasm|	positive regulation of immunoglobulin production|positive regulation of T cell cytokine production|positive regulation of B cell proliferation|positive regulation of interferon-gamma production|positive regulation of interleukin-10 production|positive regulation of interleukin-2 production|positive regulation of interleukin-4 production|positive regulation of tumor necrosis factor production|posi…	None	10	-1.5	3.73	9	-1.8	7.49	-1.6	10.7	0.0161	-2.7	-0.5	0	0	0
ENSG00000107745	MICU1	mitochondrial calcium uptake 1	intracellular|mitochondrial inner membrane|mitochondrial intermembrane space|integral component of mitochondrial membrane|calcium channel complex|uniplex complex|	mitochondrial calcium ion transport|mitochondrial calcium ion transport|defense response|calcium ion import into mitochondrion|protein homooligomerization|mitochondrial calcium ion homeostasis|positive regulation of mitochondrial calcium ion concentration|calcium ion import|	calcium ion binding|protein binding|protein heterodimerization activity|	10	-1.1	2.71	10	-0.8	8.54	-0.9	10.7	0.0161	-1.6	-0.4	0	0	0
ENSG00000149182	ARFGAP2	ADP-ribosylation factor GTPase activating protein 2	Golgi membrane|nucleolus|cytoplasm|Golgi apparatus|plasma membrane|	protein transport|vesicle-mediated transport|regulation of ARF GTPase activity|positive regulation of GTPase activity|	ARF GTPase activator activity|zinc ion binding|	10	-0.6	2.16	10	-0.6	8.85	-0.6	10.7	0.0161	-1.2	-0.3	0	0	0
ENSG00000175203	DCTN2	dynactin 2 (p50)	kinetochore|cytoplasm|centrosome|cytosol|dynactin complex|microtubule|membrane|dynein complex|growth cone|vesicle|extracellular vesicular exosome|	G2/M transition of mitotic cell cycle|mitotic cell cycle|mitotic spindle organization|mitotic nuclear division|metabolic process|cell proliferation|antigen processing and presentation of exogenous peptide antigen via MHC class II|	motor activity|protein binding|spectrin binding|	10	-0.7	1.11	10	1.9	12.6	1.8	10.7	0.0161	-1	4	0	0	0
ENSG00000141979	CTD-3222D19.2	N/A	None	None	None	10	-1.3	4.97	9	-1.2	6.09	-1.3	10.7	0.0161	-2.4	-0.6	0	0	0
ENSG00000128250	RFPL1	ret finger protein-like 1	None	None	zinc ion binding|	10	-1.2	1.06	10	-1.2	9.86	-1.2	10.7	0.0161	-2.1	-0.4	0	0	0
ENSG00000158321	AUTS2	autism susceptibility candidate 2	cellular_component|	biological_process|	molecular_function|	10	0	0	10	2.5	13.9	2.5	10.7	0.0161	1.8	5	0	0	0
ENSG00000182230	FAM153B	family with sequence similarity 153, member B	None	None	None	6	1.3	3.45	6	1.6	7.91	1.5	10.7	0.0161	0.7	2.8	0	0	0
ENSG00000153107	ANAPC1	anaphase promoting complex subunit 1	nucleoplasm|anaphase-promoting complex|cytosol|	mitotic cell cycle|mitotic nuclear division|mitotic spindle assembly checkpoint|anaphase-promoting complex-dependent proteasomal ubiquitin-dependent protein catabolic process|negative regulation of ubiquitin-protein ligase activity involved in mitotic cell cycle|positive regulation of ubiquitin-protein ligase activity involved in mitotic cell cycle|regulation of ubiquitin-protein ligase activity …	None	10	-2.6	8.45	10	-1.2	3.92	-1.3	10.7	0.0161	-3.9	-0.6	0	0	0
ENSG00000170890	PLA2G1B	phospholipase A2, group IB (pancreas)	extracellular region|extracellular space|cell surface|secretory granule|	activation of MAPK activity|innate immune response in mucosa|neutrophil mediated immunity|fatty acid biosynthetic process|phospholipid metabolic process|phosphatidic acid biosynthetic process|actin filament organization|signal transduction|positive regulation of calcium ion transport into cytosol|glucose transport|leukotriene biosynthetic process|antibacterial humoral response|neutrophil chemotax…	phospholipase A2 activity|receptor binding|receptor binding|calcium ion binding|bile acid binding|calcium-dependent phospholipase A2 activity|	10	3.7	14.2	10	0.1	0.255	3.7	10.6	0.0165	1.6	7	0	0	0
ENSG00000180869	C1ORF180	chromosome 1 open reading frame 180	None	None	None	10	2.2	6.4	10	0.6	8.42	0.7	10.6	0.0165	0.3	2.6	0	0	0
ENSG00000127774	EMC6	ER membrane protein complex subunit 6	integral component of membrane|ER membrane protein complex|	None	None	10	0.6	0.988	10	1.4	10.1	1.1	10.6	0.0165	0.4	2.2	0	0	0
ENSG00000135372	NAT10	N-acetyltransferase 10 (GCN5-related)	nucleus|nucleolus|membrane|	biological_process|metabolic process|	ATP binding|N-acetyltransferase activity|poly(A) RNA binding|	10	-1.5	8.2	10	1.4	11.4	1.1	10.6	0.0165	-2.1	3	0	0	0
ENSG00000174100	MRPL45	mitochondrial ribosomal protein L45	mitochondrion|ribosome|	None	poly(A) RNA binding|	10	-1.4	4.36	9	1.3	12	1.2	10.6	0.0165	-1	2	0	0	0
ENSG00000126254	RBM42	RNA binding motif protein 42	nucleus|cytoplasm|	None	nucleotide binding|poly(A) RNA binding|	9	-1.1	2.53	10	1	11.5	1	10.6	0.0165	-0.7	2	0	0	0
ENSG00000198730	CTR9	CTR9, Paf1/RNA polymerase II complex component	Cdc73/Paf1 complex|nuclear speck|transcriptionally active chromatin|	negative regulation of transcription from RNA polymerase II promoter|endodermal cell fate commitment|transcription, DNA-templated|JAK-STAT cascade|histone monoubiquitination|Wnt signaling pathway|stem cell maintenance|positive regulation of transcription elongation from RNA polymerase II promoter|histone H2B ubiquitination|negative regulation of myeloid cell differentiation|positive regulation of…	protein binding|SH2 domain binding|	8	-1.1	4.75	8	-1.2	6.22	-1.2	10.6	0.0165	-2.3	-0.4	0	0	0
ENSG00000123395	C12ORF44	N/A	None	None	None	9	-1	4.01	9	-0.6	7.74	-0.7	10.6	0.0165	-1.8	-0.3	0	0	0
ENSG00000092330	TINF2	TERF1 (TRF1)-interacting nuclear factor 2	chromosome, telomeric region|nuclear telomere cap complex|nucleus|nucleoplasm|perinucleolar chromocenter|nuclear matrix|	telomere maintenance|telomere maintenance via telomere lengthening|negative regulation of protein ADP-ribosylation|telomere assembly|positive regulation of telomere maintenance|negative regulation of telomere maintenance via telomerase|negative regulation of telomere maintenance via telomerase|protein localization to chromosome|protein localization to chromosome|negative regulation of epithelial …	protein binding|telomeric DNA binding|	6	1.8	1.07	8	-1.4	11.5	-1.3	10.6	0.0165	-2	-0.7	0	0	0
ENSG00000113194	FAF2	Fas associated factor family member 2	endoplasmic reticulum|lipid particle|Cdc48p-Npl4p-Ufd1p AAA ATPase complex|intracellular membrane-bounded organelle|	response to unfolded protein|lipid particle organization|negative regulation of catalytic activity|	protein binding|ubiquitin protein ligase binding|lipase binding|ubiquitin binding|lipase inhibitor activity|	10	-1.2	7.88	10	-1.5	3.23	-1.3	10.6	0.0165	-2.3	-0.4	0	0	0
ENSG00000171681	ATF7IP	activating transcription factor 7 interacting protein	nucleus|transcription factor complex|	negative regulation of transcription from RNA polymerase II promoter|ATP catabolic process|DNA methylation|transcription, DNA-templated|viral process|negative regulation of transcription, DNA-templated|positive regulation of transcription, DNA-templated|regulation of RNA polymerase II transcriptional preinitiation complex assembly|	transcription corepressor activity|protein binding|ATPase activity|	9	0.5	0.542	9	0.7	10.6	0.6	10.6	0.0165	0.2	1.3	0	0	0
ENSG00000164532	TBX20	T-box 20	nucleus|cytoplasm|	negative regulation of transcription from RNA polymerase II promoter|patterning of blood vessels|endoderm formation|neuron migration|heart looping|embryonic heart tube morphogenesis|outflow tract septum morphogenesis|tricuspid valve development|aortic valve morphogenesis|pulmonary valve formation|endocardial cushion morphogenesis|cardiac chamber formation|cardiac right ventricle morphogenesis|end…	RNA polymerase II regulatory region sequence-specific DNA binding|RNA polymerase II transcription factor binding|RNA polymerase II activating transcription factor binding|RNA polymerase II transcription coactivator activity|sequence-specific DNA binding transcription factor activity|	9	-1	3.45	9	-1.4	7.66	-1.4	10.5	0.0169	-2.6	-0.5	0	0	0
ENSG00000066136	NFYC	nuclear transcription factor Y, gamma	nucleus|nucleoplasm|CCAAT-binding factor complex|	transcription, DNA-templated|regulation of transcription, DNA-templated|regulation of transcription from RNA polymerase II promoter|protein folding|cellular lipid metabolic process|small molecule metabolic process|positive regulation of transcription, DNA-templated|	DNA binding|sequence-specific DNA binding transcription factor activity|transcription coactivator activity|protein binding|sequence-specific DNA binding|protein heterodimerization activity|	9	0.5	0.487	8	1.7	12.3	1.7	10.5	0.0169	0.8	3	0	0	0
ENSG00000123064	DDX54	DEAD (Asp-Glu-Ala-Asp) box polypeptide 54	nucleus|nucleolus|membrane|	ATP catabolic process|ATP catabolic process|transcription, DNA-templated|regulation of transcription, DNA-templated|RNA processing|RNA metabolic process|intracellular estrogen receptor signaling pathway|	transcription corepressor activity|ATP-dependent RNA helicase activity|receptor binding|ATP binding|estrogen receptor binding|poly(A) RNA binding|	10	-0.8	1.33	8	-1	9.47	-1	10.5	0.0169	-2.3	-0.4	0	0	0
ENSG00000113407	TARS	threonyl-tRNA synthetase	cytoplasm|cytoplasm|cytosol|actin cytoskeleton|extracellular vesicular exosome|	translation|tRNA aminoacylation for protein translation|threonyl-tRNA aminoacylation|gene expression|	threonine-tRNA ligase activity|threonine-tRNA ligase activity|ATP binding|protein homodimerization activity|	10	-2	13.5	9	0.3	1.32	-2	10.5	0.0169	-3.6	-1	0	0	0
ENSG00000125686	MED1	mediator complex subunit 1	chromatin|nucleus|nucleoplasm|nucleolus|membrane|mediator complex|mediator complex|protein-DNA complex|	negative regulation of transcription from RNA polymerase II promoter|cell morphogenesis|angiogenesis|liver development|embryonic placenta development|lens development in camera-type eye|thyroid hormone mediated signaling pathway|ventricular trabecula myocardium morphogenesis|retinal pigment epithelium development|DNA replication|regulation of transcription from RNA polymerase I promoter|transcrip…	RNA polymerase II core promoter proximal region sequence-specific DNA binding|sequence-specific DNA binding RNA polymerase II transcription factor activity|core promoter binding|RNA polymerase II transcription cofactor activity|chromatin binding|transcription cofactor activity|transcription coactivator activity|transcription coactivator activity|receptor activity|protein binding|transcription fac…	10	-2.5	7.94	10	0.8	11.9	0.8	10.5	0.0169	-3.3	2.8	0	0	0
ENSG00000134825	TMEM258	transmembrane protein 258	integral component of membrane|	None	None	8	-1.8	5.92	8	-0.6	7.56	-0.8	10.5	0.0169	-2.4	-0.3	0	0	0
ENSG00000142751	GPN2	GPN-loop GTPase 2	cellular_component|	biological_process|	molecular_function|GTP binding|	8	1.4	8.92	8	-1.8	6.04	0.9	10.5	0.0169	0.2	3.1	0	0	0
ENSG00000157181	C1ORF27	chromosome 1 open reading frame 27	integral component of membrane|	oxidation-reduction process|	zinc ion binding|oxidoreductase activity|	10	0.7	1.53	10	1	9.74	0.9	10.5	0.0169	0.4	1.9	0	0	0
ENSG00000160991	ORAI2	ORAI calcium release-activated calcium modulator 2	integral component of membrane|growth cone|	None	protein binding|	10	0.5	0.472	10	1.4	11.1	1.4	10.5	0.0169	0.6	2.7	0	0	0
ENSG00000258984	UBE2F-SCLY	UBE2F-SCLY readthrough (NMD candidate)	None	None	None	3	1.5	3.35	3	1.6	7.55	1.6	10.5	0.0169	0.9	3	0	0	0
ENSG00000090447	TFAP4	transcription factor AP-4 (activating enhancer binding protein 4)	nucleus|transcriptional repressor complex|	transcription from RNA polymerase II promoter|protein complex assembly|DNA damage response, signal transduction by p53 class mediator resulting in transcription of p21 class mediator|negative regulation of cell proliferation|positive regulation of apoptotic process|negative regulation of DNA binding|negative regulation by host of viral transcription|negative regulation by host of viral transcript…	RNA polymerase II core promoter proximal region sequence-specific DNA binding|RNA polymerase II core promoter proximal region sequence-specific DNA binding transcription factor activity involved in positive regulation of transcription|DNA binding|RNA polymerase II distal enhancer sequence-specific DNA binding transcription factor activity|protein binding|protein homodimerization activity|histone …	10	-1.6	5.96	10	-1	5.47	-1.2	10.5	0.0169	-2.4	-0.4	0	0	0
ENSG00000164167	LSM6	LSM6 homolog, U6 small nuclear RNA associated (S. cerevisiae)	spliceosomal complex|cytosol|small nuclear ribonucleoprotein complex|extracellular vesicular exosome|	nuclear-transcribed mRNA catabolic process, deadenylation-dependent decay|rRNA processing|mRNA processing|tRNA processing|RNA splicing|gene expression|RNA metabolic process|mRNA metabolic process|exonucleolytic nuclear-transcribed mRNA catabolic process involved in deadenylation-dependent decay|	protein binding|poly(A) RNA binding|	10	0.4	0.567	9	1.1	10.5	1.1	10.5	0.0169	0.5	2.4	0	0	0
ENSG00000134138	MEIS2	Meis homeobox 2	nucleus|	negative regulation of transcription from RNA polymerase II promoter|eye development|transcription from RNA polymerase II promoter|response to mechanical stimulus|pancreas development|negative regulation of myeloid cell differentiation|positive regulation of transcription from RNA polymerase II promoter|response to growth factor|	RNA polymerase II core promoter proximal region sequence-specific DNA binding|RNA polymerase II core promoter proximal region sequence-specific DNA binding transcription factor activity involved in positive regulation of transcription|sequence-specific DNA binding transcription factor activity|transcription cofactor activity|transcription corepressor activity|protein binding|transcription factor …	10	-0.7	1.16	10	-1.7	9.92	-1.7	10.5	0.0169	-2.9	-0.3	0	0	0
ENSG00000103540	CCP110	centriolar coiled coil protein 110kDa	centrosome|centriole|cytosol|protein complex|	G2/M transition of mitotic cell cycle|mitotic cell cycle|centriole replication|cell projection organization|regulation of cytokinesis|centrosome duplication|centrosome duplication|	protein binding|	10	-1.5	3.09	10	-1.3	7.83	-1.4	10.4	0.0172	-2.4	-0.5	0	0	0
ENSG00000116001	TIA1	TIA1 cytotoxic granule-associated RNA binding protein	cytoplasmic stress granule|nuclear stress granule|	apoptotic process|negative regulation of translation|negative regulation of cytokine biosynthetic process|regulation of mRNA splicing, via spliceosome|	nucleotide binding|protein binding|poly(A) binding|AU-rich element binding|poly(A) RNA binding|	10	0.9	3.21	10	1.3	7.79	1	10.4	0.0172	0.4	2.1	0	0	0
ENSG00000137273	FOXF2	forkhead box F2	nucleus|nucleus|transcription factor complex|	epithelial to mesenchymal transition|transcription, DNA-templated|extracellular matrix organization|establishment of planar polarity of embryonic epithelium|negative regulation of transcription, DNA-templated|positive regulation of transcription, DNA-templated|positive regulation of transcription from RNA polymerase II promoter|positive regulation of transcription from RNA polymerase II promoter|…	RNA polymerase II regulatory region sequence-specific DNA binding|RNA polymerase II transcription regulatory region sequence-specific DNA binding transcription factor activity involved in positive regulation of transcription|RNA polymerase II transcription regulatory region sequence-specific DNA binding transcription factor activity involved in positive regulation of transcription|DNA binding|seq…	10	-3.1	4.9	10	-1	7.48	-1	10.4	0.0172	-4	-0.4	0	0	0
ENSG00000135480	KRT7	keratin 7	nucleus|cytoplasm|intermediate filament|keratin filament|	viral process|	structural molecule activity|protein binding|	10	-3.4	6.07	10	-2.3	5.96	-3.2	10.4	0.0172	-6.7	-1.8	0	0	0
ENSG00000105281	SLC1A5	solute carrier family 1 (neutral amino acid transporter), member 5	Golgi apparatus|plasma membrane|plasma membrane|integral component of plasma membrane|membrane|melanosome|extracellular vesicular exosome|	amino acid transmembrane transport|ion transport|dicarboxylic acid transport|extracellular amino acid transport|amino acid transport|glutamine transport|response to virus|neutral amino acid transport|L-serine transport|transmembrane transport|	virus receptor activity|receptor activity|protein binding|neutral amino acid transmembrane transporter activity|L-glutamine transmembrane transporter activity|L-serine transmembrane transporter activity|sodium:dicarboxylate symporter activity|	10	1.4	5.36	10	1	5.82	1.1	10.4	0.0172	0.4	2.4	0	0	0
ENSG00000036549	ZZZ3	zinc finger, ZZ-type containing 3	Ada2/Gcn5/Ada3 transcription activator complex|	chromatin organization|transcription, DNA-templated|regulation of transcription, DNA-templated|	DNA binding|chromatin binding|protein binding|zinc ion binding|	9	-1.9	13.3	8	0.5	0.923	-1.8	10.4	0.0172	-3.5	-0.9	0	0	0
ENSG00000168564	CDKN2AIP	CDKN2A interacting protein	granular component|nucleus|nucleoplasm|nucleolus|cytoplasm|	positive regulation of signal transduction|negative regulation of cell growth|regulation of protein stability|	p53 binding|RNA binding|protein binding|	10	-2.3	13.6	10	1.3	1.29	-2.3	10.4	0.0172	-4.5	-1	0	0	0
ENSG00000183793	NPIPA5	nuclear pore complex interacting protein family, member A5	None	None	None	9	-1.5	9.85	9	0.5	3.63	-1.5	10.4	0.0172	-3.3	-0.6	0	0	0
ENSG00000230453	ANKRD18B	ankyrin repeat domain 18B	None	None	None	9	-0.5	0.809	9	-1	10.4	-1	10.4	0.0172	-1.8	-0.5	0	0	0
ENSG00000184357	HIST1H1B	histone cluster 1, H1b	nucleosome|nuclear chromatin|nuclear heterochromatin|extracellular vesicular exosome|	negative regulation of transcription from RNA polymerase II promoter|chromatin organization|nucleosome assembly|positive regulation of cell growth|protein stabilization|positive regulation of histone H3-K9 methylation|establishment of protein localization to chromatin|	chromatin DNA binding|histone deacetylase binding|poly(A) RNA binding|	10	-2.4	11.3	10	-0.9	1.8	-1.9	10.4	0.0172	-4.1	-0.6	0	0	0
ENSG00000014824	SLC30A9	solute carrier family 30 (zinc transporter), member 9	nucleus|cytoskeleton|integral component of membrane|	nucleotide-excision repair|transcription, DNA-templated|zinc ion transport|positive regulation of transcription from RNA polymerase II promoter|transmembrane transport|	chromatin binding|sequence-specific DNA binding transcription factor activity|cation transmembrane transporter activity|ligand-dependent nuclear receptor binding|ligand-dependent nuclear receptor transcription coactivator activity|	9	-1.4	6.31	10	-0.8	5.37	-0.9	10.4	0.0172	-2.3	-0.4	0	0	0
ENSG00000159753	RLTPR	RGD motif, leucine rich repeats, tropomodulin domain and proline-rich containing	cytoplasm|membrane|	None	None	10	2.7	1.04	10	-0.8	12.1	-0.8	10.4	0.0172	-1.5	-0.3	0	0	0
ENSG00000100150	DEPDC5	DEP domain containing 5	lysosomal membrane|cytosol|perinuclear region of cytoplasm|	intracellular signal transduction|positive regulation of GTPase activity|	GTPase activator activity|	9	1.5	1.52	9	-1.8	13	-1.8	10.4	0.0172	-3	-1.2	0	0	0
ENSG00000132002	DNAJB1	DnaJ (Hsp40) homolog, subfamily B, member 1	nucleus|nucleolus|cytosol|extracellular vesicular exosome|	response to unfolded protein|positive regulation of ATPase activity|chaperone mediated protein folding requiring cofactor|chaperone cofactor-dependent protein refolding|negative regulation of inclusion body assembly|	ATPase activator activity|protein binding|Hsp70 protein binding|unfolded protein binding|chaperone binding|ATPase binding|	10	-0.5	0.729	9	-1.4	10.8	-1	10.4	0.0172	-2.3	-0.5	0	0	0
ENSG00000196504	PRPF40A	PRP40 pre-mRNA processing factor 40 homolog A (S. cerevisiae)	nucleus|cytoplasm|membrane|nuclear matrix|nuclear speck|	mRNA processing|cytoskeleton organization|cell cycle|regulation of cell shape|RNA splicing|cell migration|regulation of cytokinesis|cell division|	protein binding|poly(A) RNA binding|proline-rich region binding|	9	1.2	4.51	9	-1.7	10.7	-1.8	10.4	0.0172	-3.6	-0.8	0	0	0
ENSG00000099956	SMARCB1	SWI/SNF related, matrix associated, actin dependent regulator of chromatin, subfamily b, member 1	nuclear chromatin|XY body|nucleus|nucleoplasm|nucleolus|SWI/SNF complex|protein complex|npBAF complex|nBAF complex|	blastocyst hatching|DNA repair|nucleosome disassembly|chromatin remodeling|transcription, DNA-templated|regulation of transcription from RNA polymerase II promoter|nervous system development|negative regulation of cell proliferation|DNA integration|cell differentiation|single stranded viral RNA replication via double stranded DNA intermediate|ATP-dependent chromatin remodeling|ATP-dependent chrom…	RNA polymerase II core promoter proximal region sequence-specific DNA binding|RNA polymerase II distal enhancer sequence-specific DNA binding|p53 binding|transcription coactivator activity|transcription coactivator activity|protein binding|Tat protein binding|nucleosomal DNA binding|	9	1.9	6.08	9	1.7	4.86	1.8	10.4	0.0172	1.1	3.7	0	0	0
ENSG00000186193	SAPCD2	suppressor APC domain containing 2	nucleus|nucleolus|cytoplasm|	None	None	9	2.1	8.96	9	1.1	3.32	1.7	10.3	0.0177	0.6	4.1	0	0	0
ENSG00000143256	PFDN2	prefoldin subunit 2	nucleus|nucleolus|cytoplasm|mitochondrion|Golgi apparatus|prefoldin complex|extracellular vesicular exosome|	protein folding|protein folding|cellular protein metabolic process|'de novo' posttranslational protein folding|	protein binding|unfolded protein binding|	10	-2.2	3.93	10	-1	8.02	-1.3	10.3	0.0177	-3	-0.4	0	0	0
ENSG00000155545	MIER3	mesoderm induction early response 1, family member 3	nucleus|	transcription, DNA-templated|regulation of transcription, DNA-templated|	DNA binding|chromatin binding|	10	-0.7	0.515	10	0.8	10.5	0.8	10.3	0.0177	0.3	1.8	0	0	0
ENSG00000204152	TIMM23B	translocase of inner mitochondrial membrane 23 homolog B (yeast)	cellular_component|mitochondrial inner membrane presequence translocase complex|integral component of membrane|	intracellular protein transport|biological_process|protein transmembrane transport|	molecular_function|P-P-bond-hydrolysis-driven protein transmembrane transporter activity|	5	-2.2	7.51	5	-0.7	6.24	-1.2	10.3	0.0177	-3.8	-0.5	0	0	0
ENSG00000108294	PSMB3	proteasome (prosome, macropain) subunit, beta type, 3	proteasome complex|nucleus|nucleoplasm|cytoplasm|mitochondrion|Golgi apparatus|cytosol|proteasome core complex|actin cytoskeleton|extracellular vesicular exosome|	G1/S transition of mitotic cell cycle|protein polyubiquitination|mitotic cell cycle|antigen processing and presentation of peptide antigen via MHC class I|antigen processing and presentation of exogenous peptide antigen via MHC class I, TAP-dependent|regulation of cellular amino acid metabolic process|apoptotic process|DNA damage response, signal transduction by p53 class mediator resulting in ce…	threonine-type endopeptidase activity|protein binding|	9	1.8	5.29	10	-1.6	13.2	-1.5	10.3	0.0177	-2.9	-0.6	0	0	0
ENSG00000172081	MOB3A	MOB kinase activator 3A	intracellular|	None	metal ion binding|	9	0.7	4.6	9	1.1	6.22	0.7	10.3	0.0177	0.3	1.6	0	0	0
ENSG00000177302	TOP3A	topoisomerase (DNA) III alpha	nucleus|chromosome|PML body|	DNA topological change|meiotic nuclear division|	DNA binding|DNA topoisomerase type I activity|protein binding|zinc ion binding|	8	-2.4	7.04	8	-1.4	4.97	-1.5	10.3	0.0177	-4	-0.7	0	0	0
ENSG00000134901	KDELC1	KDEL (Lys-Asp-Glu-Leu) containing 1	endoplasmic reticulum lumen|	None	None	10	-2.3	6.62	10	-1.8	4.18	-1.8	10.3	0.0177	-4.1	-0.8	0	0	0
ENSG00000168334	XIRP1	xin actin-binding repeat containing 1	fascia adherens|	negative regulation of cell proliferation|regulation of membrane potential|sarcomere organization|cardiac muscle cell development|	actin binding|poly(A) RNA binding|	10	0.5	0.927	10	0.7	9.68	0.7	10.3	0.0177	0.3	1.3	0	0	0
ENSG00000256525	POLG2	polymerase (DNA directed), gamma 2, accessory subunit	mitochondrial chromosome|mitochondrial nucleoid|extracellular vesicular exosome|	DNA replication|DNA-dependent DNA replication|DNA repair|	DNA binding|DNA-directed DNA polymerase activity|protein binding|identical protein binding|	9	1.7	3.86	9	-1.7	7.71	1.6	10.3	0.0177	-1.5	4	0	0	0
ENSG00000040275	SPDL1	spindle apparatus coiled-coil protein 1	spindle pole|condensed chromosome outer kinetochore|nucleus|microtubule organizing center|cytosol|	establishment of mitotic spindle orientation|mitotic cell cycle|mitotic metaphase plate congression|spindle checkpoint|protein localization to kinetochore|	protein binding|enzyme binding|kinetochore binding|	9	-2.2	1.21	9	-1.4	9.97	-1.5	10.3	0.0177	-3	-0.6	0	0	0
ENSG00000204003	LCN6	lipocalin 6	extracellular region|	single fertilization|	None	10	-0.1	0.0522	10	-1.6	12.7	-1.5	10.3	0.0177	-2.9	-1.1	0	0	0
ENSG00000109919	MTCH2	mitochondrial carrier 2	nucleus|mitochondrial inner membrane|membrane|integral component of membrane|extracellular vesicular exosome|	transport|protein localization to mitochondrion|	None	9	-0.5	0.344	10	-1	10.4	-1	10.3	0.0177	-1.8	-0.6	0	0	0
ENSG00000265303	CTD-2510F5.6	N/A	None	None	None	10	2.6	4.84	10	0.7	9.54	1	10.3	0.0177	0.3	3	0	0	0
ENSG00000260300	RP11-505K9.4	N/A	None	None	None	8	-1.6	6.8	8	-0.7	5.94	-0.9	10.3	0.0177	-2.5	-0.4	0	0	0
ENSG00000167283	ATP5L	ATP synthase, H+ transporting, mitochondrial Fo complex, subunit G	mitochondrial proton-transporting ATP synthase complex, coupling factor F(o)|mitochondrion|mitochondrial inner membrane|mitochondrial proton-transporting ATP synthase complex|extracellular vesicular exosome|	ATP catabolic process|respiratory electron transport chain|mitochondrial ATP synthesis coupled proton transport|mitochondrial ATP synthesis coupled proton transport|cellular metabolic process|small molecule metabolic process|	hydrogen ion transmembrane transporter activity|ATPase activity|transmembrane transporter activity|	8	2.5	2.2	10	-1.5	9.82	-1.5	10.3	0.0177	-2.8	-0.8	0	0	0
ENSG00000140992	PDPK1	3-phosphoinositide dependent protein kinase 1	nucleoplasm|cytoplasm|cytoplasm|cytosol|plasma membrane|plasma membrane|focal adhesion|membrane|cytoplasmic membrane-bounded vesicle|cell projection|	type B pancreatic cell development|transcription, DNA-templated|regulation of transcription, DNA-templated|protein phosphorylation|protein phosphorylation|negative regulation of protein kinase activity|hyperosmotic response|epidermal growth factor receptor signaling pathway|epidermal growth factor receptor signaling pathway|synaptic transmission|blood coagulation|insulin receptor signaling pathwa…	protein serine/threonine kinase activity|protein serine/threonine kinase activity|protein serine/threonine kinase activity|3-phosphoinositide-dependent protein kinase activity|insulin receptor binding|protein binding|ATP binding|phospholipase activator activity|kinase activity|protein kinase binding|phospholipase binding|	10	-1.3	1.83	9	1.6	10.7	1.3	10.3	0.0177	0.3	2.6	0	0	0
ENSG00000100813	ACIN1	apoptotic chromatin condensation inducer 1	nucleus|cytoplasm|cytosol|plasma membrane|nuclear speck|exon-exon junction complex|ASAP complex|	ATP catabolic process|mRNA processing|apoptotic process|cellular component disassembly involved in execution phase of apoptosis|RNA splicing|erythrocyte differentiation|apoptotic chromosome condensation|positive regulation of apoptotic process|positive regulation of monocyte differentiation|negative regulation of mRNA splicing, via spliceosome|	nucleotide binding|nucleic acid binding|protein binding|ATPase activity|enzyme binding|poly(A) RNA binding|	10	-1.3	3.04	10	-1.2	7.65	-1.2	10.3	0.0177	-2.3	-0.5	0	0	0
ENSG00000181625	SLX1B	SLX1 structure-specific endonuclease subunit homolog B (S. cerevisiae)	None	None	None	10	-1.2	3.54	9	-1.4	7.2	-1.4	10.3	0.0177	-2.7	-0.4	0	0	0
ENSG00000242574	HLA-DMB	major histocompatibility complex, class II, DM beta	lysosomal membrane|integral component of membrane|late endosome membrane|MHC class II protein complex|	MHC class II protein complex assembly|peptide antigen assembly with MHC class II protein complex|immune response|antigen processing and presentation of exogenous peptide antigen via MHC class II|antigen processing and presentation of exogenous peptide antigen via MHC class II|positive regulation of T cell proliferation|positive regulation of T cell activation via T cell receptor contact with anti…	MHC class II protein complex binding|	10	-1	2.58	10	-0.9	8.04	-0.9	10.2	0.0181	-1.8	-0.4	0	0	0
ENSG00000141293	SKAP1	src kinase associated phosphoprotein 1	nucleus|cytoplasm|plasma membrane|	positive regulation of signal transduction|positive regulation of transcription, DNA-templated|positive regulation of transcription from RNA polymerase II promoter|positive regulation of transcription from RNA polymerase II promoter|T cell receptor signaling pathway|	SH3/SH2 adaptor activity|protein binding|SH3 domain binding|protein kinase binding|protein phosphatase binding|protein complex binding|SH2 domain binding|	10	-1	5.05	10	-0.9	5.58	-0.9	10.2	0.0181	-2.3	-0.4	0	0	0
ENSG00000257315	ZBED6	zinc finger, BED-type containing 6	nucleus|nucleolus|	negative regulation of transcription from RNA polymerase II promoter|transcription, DNA-templated|negative regulation of transcription, DNA-templated|	DNA binding|metal ion binding|protein dimerization activity|	10	1	4.08	10	0.6	7.19	0.7	10.2	0.0181	0.3	1.6	0	0	0
ENSG00000148303	RPL7A	ribosomal protein L7a	nucleus|cytosol|membrane|cytosolic large ribosomal subunit|polysomal ribosome|extracellular vesicular exosome|	nuclear-transcribed mRNA catabolic process, nonsense-mediated decay|translation|translation|translational initiation|translational elongation|translational termination|SRP-dependent cotranslational protein targeting to membrane|gene expression|viral process|RNA metabolic process|mRNA metabolic process|viral life cycle|viral transcription|ribosome biogenesis|cellular protein metabolic process|	RNA binding|structural constituent of ribosome|protein binding|poly(A) RNA binding|	10	2.5	2.56	10	1.8	8.61	1.8	10.2	0.0181	0.8	4.3	0	0	0
ENSG00000198832	SELM	selenoprotein M	endoplasmic reticulum|Golgi apparatus|perinuclear region of cytoplasm|	None	None	10	-0.4	0.458	10	-1.6	11.7	-1.5	10.2	0.0181	-2.8	-0.9	0	0	0
ENSG00000139746	RBM26	RNA binding motif protein 26	None	mRNA processing|negative regulation of phosphatase activity|	nucleotide binding|protein binding|poly(A) RNA binding|metal ion binding|	10	-0.7	0.826	9	-0.7	9.66	-0.7	10.2	0.0181	-1.7	-0.3	0	0	0
ENSG00000204052	LRRC73	leucine rich repeat containing 73	None	None	None	10	-1.8	3.99	10	-0.8	8.44	-1	10.2	0.0181	-2.3	-0.3	0	0	0
ENSG00000131148	EMC8	ER membrane protein complex subunit 8	nucleus|cytoplasm|mitochondrion|membrane|ER membrane protein complex|	None	None	9	0.2	0.346	9	0.8	10.2	0.8	10.2	0.0181	0.3	2	0	0	0
ENSG00000004961	HCCS	holocytochrome c synthase	mitochondrion|mitochondrial inner membrane|	organ morphogenesis|oxidation-reduction process|	holocytochrome-c synthase activity|metal ion binding|	10	-0.5	0.746	10	-1.4	10.9	-0.9	10.2	0.0181	-2.3	-0.4	0	0	0
ENSG00000129559	NEDD8	neural precursor cell expressed, developmentally down-regulated 8	nucleus|cytosol|extracellular vesicular exosome|	regulation of transcription from RNA polymerase II promoter|cellular protein modification process|proteolysis|ubiquitin-dependent protein catabolic process|transforming growth factor beta receptor signaling pathway|protein localization|anatomical structure morphogenesis|response to organic cyclic compound|protein neddylation|	protein binding|ubiquitin protein ligase binding|	6	1.8	5.42	6	1.1	6.64	1.4	10.2	0.0181	0.6	3.4	0	0	0
ENSG00000160211	G6PD	glucose-6-phosphate dehydrogenase	nucleus|cytoplasm|cytosol|cytosol|cytoplasmic side of plasma membrane|membrane|extracellular vesicular exosome|	cytokine production|carbohydrate metabolic process|pentose-phosphate shunt|pentose-phosphate shunt|lipid metabolic process|cholesterol biosynthetic process|NADP metabolic process|NADPH regeneration|glutathione metabolic process|pentose-phosphate shunt, oxidative branch|negative regulation of protein glutathionylation|response to organic cyclic compound|pentose biosynthetic process|substantia nigr…	glucose-6-phosphate dehydrogenase activity|glucose-6-phosphate dehydrogenase activity|protein binding|glucose binding|glucose binding|protein homodimerization activity|NADP binding|	10	2.4	3.31	10	-0.8	11.8	-0.8	10.2	0.0181	-2.4	-0.2	0	0	0
ENSG00000083845	RPS5	ribosomal protein S5	cytosol|membrane|cytosolic small ribosomal subunit|ribonucleoprotein complex|extracellular vesicular exosome|	nuclear-transcribed mRNA catabolic process, nonsense-mediated decay|translation|translation|translation|translation|translational initiation|translational initiation|translational elongation|translational termination|regulation of translational fidelity|SRP-dependent cotranslational protein targeting to membrane|gene expression|viral process|RNA metabolic process|mRNA metabolic process|viral life…	RNA binding|mRNA binding|structural constituent of ribosome|poly(A) RNA binding|	8	-1.5	5.65	9	-0.9	5.4	-1	10.2	0.0181	-2.5	-0.5	0	0	0
ENSG00000132522	GPS2	G protein pathway suppressor 2	nucleus|transcriptional repressor complex|	negative regulation of transcription from RNA polymerase II promoter|inactivation of MAPK activity|cell cycle|JNK cascade|negative regulation of JNK cascade|	transcription corepressor activity|GTPase inhibitor activity|protein binding|	9	-0.7	1.02	9	-0.8	9.57	-0.8	10.2	0.0181	-1.5	-0.3	0	0	0
ENSG00000122406	RPL5	ribosomal protein L5	nucleus|nucleolus|cytoplasm|cytosol|membrane|cytosolic large ribosomal subunit|ribonucleoprotein complex|extracellular vesicular exosome|	nuclear-transcribed mRNA catabolic process, nonsense-mediated decay|rRNA processing|translation|translation|translational initiation|translational elongation|translational termination|SRP-dependent cotranslational protein targeting to membrane|gene expression|viral process|RNA metabolic process|mRNA metabolic process|viral life cycle|viral transcription|ribosomal large subunit biogenesis|cellular…	RNA binding|structural constituent of ribosome|protein binding|5S rRNA binding|poly(A) RNA binding|	7	0	0	8	-1.3	10.8	-1.3	10.2	0.0181	-2.4	-0.5	0	0	0
ENSG00000177030	DEAF1	DEAF1 transcription factor	extracellular region|nucleus|nucleus|transcription factor complex|cytoplasm|cytoplasm|	neural tube closure|regulation of transcription from RNA polymerase II promoter|transcription from RNA polymerase II promoter|germ cell development|anatomical structure morphogenesis|regulation of mammary gland epithelial cell proliferation|embryonic skeletal system development|	DNA binding|protein binding|metal ion binding|	10	-2.3	4.03	10	-1.3	6.86	-1.3	10.1	0.0185	-3.3	-0.4	0	0	0
ENSG00000185432	METTL7A	methyltransferase like 7A	endoplasmic reticulum|lipid particle|membrane|extracellular vesicular exosome|	methylation|	methyltransferase activity|	10	1.5	5.31	10	1.9	5.41	1.9	10.1	0.0185	1	3.7	0	0	0
ENSG00000165819	METTL3	methyltransferase like 3	nucleus|nucleoplasm|nuclear speck|MIS complex|	RNA methylation|mRNA processing|circadian rhythm|gene expression|stem cell maintenance|mRNA destabilization|mRNA methylation|mRNA methylation|	RNA binding|mRNA (2'-O-methyladenosine-N6-)-methyltransferase activity|mRNA (2'-O-methyladenosine-N6-)-methyltransferase activity|	10	-0.2	0.335	10	-1.8	11.5	-0.9	10.1	0.0185	-3	-0.4	0	0	0
ENSG00000102096	PIM2	Pim-2 proto-oncogene, serine/threonine kinase	None	G1/S transition of mitotic cell cycle|protein phosphorylation|protein phosphorylation|male meiosis|cell proliferation|negative regulation of cell proliferation|apoptotic mitochondrial changes|response to virus|positive regulation of autophagy|negative regulation of apoptotic process|positive regulation of I-kappaB kinase/NF-kappaB signaling|positive regulation of transcription, DNA-templated|prot…	protein serine/threonine kinase activity|ATP binding|	9	1.2	2.51	10	0.7	8.21	0.8	10.1	0.0185	0.3	1.8	0	0	0
ENSG00000033011	ALG1	ALG1, chitobiosyldiphosphodolichol beta-mannosyltransferase	endoplasmic reticulum|endoplasmic reticulum membrane|membrane|integral component of membrane|	protein glycosylation|dolichol-linked oligosaccharide biosynthetic process|lipopolysaccharide biosynthetic process|protein N-linked glycosylation via asparagine|post-translational protein modification|cellular protein metabolic process|mannosylation|mannosylation|	mannosyltransferase activity|chitobiosyldiphosphodolichol beta-mannosyltransferase activity|	10	-1.6	5.88	9	-1	5.45	-1.3	10.1	0.0185	-2.8	-0.5	0	0	0
ENSG00000011304	PTBP1	polypyrimidine tract binding protein 1	nucleoplasm|nucleolus|membrane|extracellular vesicular exosome|	alternative mRNA splicing, via spliceosome|regulation of alternative mRNA splicing, via spliceosome|mRNA splicing, via spliceosome|mRNA processing|RNA splicing|gene expression|negative regulation of RNA splicing|negative regulation of mRNA splicing, via spliceosome|negative regulation of muscle cell differentiation|	nucleotide binding|RNA binding|protein binding|poly-pyrimidine tract binding|pre-mRNA binding|poly(A) RNA binding|	9	1.1	1.1	10	0.6	9.6	0.7	10.1	0.0185	0.2	1.5	0	0	0
ENSG00000115421	PAPOLG	poly(A) polymerase gamma	nucleus|nucleus|cytoplasm|membrane|	mRNA polyadenylation|RNA polyadenylation|	RNA binding|polynucleotide adenylyltransferase activity|polynucleotide adenylyltransferase activity|ATP binding|metal ion binding|	10	0.6	1.08	10	0.7	9.25	0.7	10.1	0.0185	0.3	1.4	0	0	0
ENSG00000143543	JTB	jumping translocation breakpoint	cytoplasm|mitochondrion|centrosome|spindle|integral component of plasma membrane|membrane|midbody|	cytokinesis|mitotic nuclear division|apoptotic mitochondrial changes|regulation of cell proliferation|positive regulation of protein kinase activity|	protein kinase binding|	9	-2	2.64	7	1.3	10	1.2	10.1	0.0185	0.7	2	0	0	0
ENSG00000137054	POLR1E	polymerase (RNA) I polypeptide E, 53kDa	nucleolus|DNA-directed RNA polymerase I complex|	transcription from RNA polymerase I promoter|rRNA transcription|	RNA polymerase I activity|DNA binding|	9	1.3	0.401	9	0.8	10.1	0.9	10.1	0.0185	0.3	1.9	0	0	0
ENSG00000100296	THOC5	THO complex 5	transcription export complex|THO complex|THO complex part of transcription export complex|nucleus|cytoplasm|nuclear speck|	mRNA processing|mRNA export from nucleus|RNA splicing|monocyte differentiation|positive regulation of DNA-templated transcription, elongation|negative regulation of macrophage differentiation|viral mRNA export from host cell nucleus|primitive hemopoiesis|negative regulation of DNA damage checkpoint|	RNA binding|protein binding|	10	-1.7	9.92	9	1	4.15	-1.5	10.1	0.0185	-2.9	-0.5	0	0	0
ENSG00000197863	ZNF790	zinc finger protein 790	nucleus|	transcription, DNA-templated|regulation of transcription, DNA-templated|	DNA binding|sequence-specific DNA binding transcription factor activity|metal ion binding|	10	-3.2	11.8	9	0.4	2.47	-3.1	10.1	0.0185	-5.9	-1	0	0	0
ENSG00000105251	SHD	Src homology 2 domain containing transforming protein D	None	None	protein binding|	10	0.1	0.0963	10	0.6	10.4	0.6	10	0.019	0.3	1.5	0	0	0
ENSG00000119862	LGALSL	lectin, galactoside-binding-like	intracellular|	None	carbohydrate binding|	10	-1.6	7.1	10	-1.3	3.44	-1.4	10	0.019	-2.6	-0.4	0	0	0
ENSG00000131668	BARX1	BARX homeobox 1	nucleus|	transcription, DNA-templated|regulation of transcription, DNA-templated|cell-cell signaling|anterior/posterior pattern specification|negative regulation of Wnt signaling pathway|epithelial cell differentiation|spleen development|digestive system development|	transcription regulatory region sequence-specific DNA binding|sequence-specific DNA binding transcription factor activity|	10	-2.4	3.06	10	-1.2	8.27	-1.3	10	0.019	-3.2	-0.4	0	0	0
ENSG00000140993	TIGD7	tigger transposable element derived 7	nucleus|	None	DNA binding|	10	-3.8	13.7	10	1.9	5.18	-3.7	9.99	0.0191	-7	-0.9	0	0	0
ENSG00000077463	SIRT6	sirtuin 6	nucleus|nucleoplasm|nuclear telomeric heterochromatin|	protein ADP-ribosylation|protein ADP-ribosylation|regulation of double-strand break repair via homologous recombination|histone deacetylation|histone H3 deacetylation|	NAD+ ADP-ribosyltransferase activity|NAD(P)+-protein-arginine ADP-ribosyltransferase activity|protein binding|zinc ion binding|NAD-dependent histone deacetylase activity|NAD-dependent histone deacetylase activity (H3-K9 specific)|NAD+ binding|	10	1.9	4.54	10	1.1	6.91	1.3	9.99	0.0191	0.4	2.9	0	0	0
ENSG00000136521	NDUFB5	NADH dehydrogenase (ubiquinone) 1 beta subcomplex, 5, 16kDa	nucleus|mitochondrion|mitochondrial inner membrane|mitochondrial respiratory chain complex I|mitochondrial respiratory chain complex I|integral component of membrane|	mitochondrial electron transport, NADH to ubiquinone|respiratory electron transport chain|cellular metabolic process|small molecule metabolic process|	NADH dehydrogenase (ubiquinone) activity|	9	-0.6	1.62	10	-1	9.08	-0.9	9.99	0.0191	-1.7	-0.4	0	0	0
ENSG00000156858	PRR14	proline rich 14	None	None	None	9	-1.4	8.46	9	-0.5	5.47	-0.7	9.98	0.0191	-2	-0.3	0	0	0
ENSG00000151461	UPF2	UPF2 regulator of nonsense transcripts homolog (yeast)	nucleus|cytoplasm|cytosol|exon-exon junction complex|perinuclear region of cytoplasm|	nuclear-transcribed mRNA catabolic process, nonsense-mediated decay|nuclear-transcribed mRNA catabolic process, nonsense-mediated decay|liver development|mRNA export from nucleus|gene expression|RNA metabolic process|mRNA metabolic process|organ regeneration|	RNA binding|protein binding|	10	1.6	13.2	10	-1.4	3.75	1.5	9.98	0.0191	0.7	3	0	0	0
ENSG00000205678	TECRL	trans-2,3-enoyl-CoA reductase-like	cytoplasm|integral component of membrane|	lipid metabolic process|oxidation-reduction process|	oxidoreductase activity, acting on the CH-CH group of donors|	10	0.2	0.189	9	2.2	12.6	2.2	9.97	0.0192	1.2	4	0	0	0
ENSG00000103051	COG4	component of oligomeric golgi complex 4	Golgi membrane|Golgi transport complex|	retrograde vesicle-mediated transport, Golgi to ER|Golgi organization|protein transport|Golgi vesicle prefusion complex stabilization|	protein binding|	10	-1.5	9.12	9	-1.4	1.28	-1.5	9.97	0.0192	-2.8	-0.7	0	0	0
ENSG00000145817	YIPF5	Yip1 domain family, member 5	endoplasmic reticulum membrane|integral component of membrane|ER to Golgi transport vesicle|Golgi cisterna membrane|endoplasmic reticulum exit site|	protein transport|vesicle-mediated transport|regulation of ER to Golgi vesicle-mediated transport|	None	9	-0.8	1.56	10	-1	8.74	-1	9.96	0.0193	-2.4	-0.4	0	0	0
ENSG00000157950	SSX2B	synovial sarcoma, X breakpoint 2B	nucleus|	transcription, DNA-templated|regulation of transcription, DNA-templated|	nucleic acid binding|protein binding|	1	1.3	2.18	1	1.6	8.27	1.6	9.96	0.0193	1	3	0	0	0
ENSG00000204256	BRD2	bromodomain containing 2	nucleus|cytoplasm|	nucleosome assembly|transcription, DNA-templated|regulation of transcription from RNA polymerase II promoter|spermatogenesis|chromatin modification|	chromatin binding|protein binding|lysine-acetylated histone binding|	10	-1.2	3.23	9	-0.7	7.62	-0.8	9.95	0.0194	-2.2	-0.3	0	0	0
ENSG00000143742	SRP9	signal recognition particle 9kDa	signal recognition particle receptor complex|signal recognition particle, endoplasmic reticulum targeting|cytosol|extracellular vesicular exosome|	translation|SRP-dependent cotranslational protein targeting to membrane|gene expression|cellular protein metabolic process|negative regulation of translational elongation|	RNA binding|signal recognition particle binding|7S RNA binding|	10	-1	4.65	9	-1.3	5.81	-1.2	9.94	0.0194	-2.4	-0.5	0	0	0
ENSG00000124783	SSR1	signal sequence receptor, alpha	endoplasmic reticulum|endoplasmic reticulum membrane|integral component of membrane|	translation|cotranslational protein targeting to membrane|SRP-dependent cotranslational protein targeting to membrane|activation of signaling protein activity involved in unfolded protein response|positive regulation of cell proliferation|gene expression|endoplasmic reticulum unfolded protein response|cellular protein metabolic process|	protein binding|	10	-0.4	0.553	10	-1.5	10.2	-1.4	9.94	0.0194	-2.4	-0.4	0	0	0
ENSG00000157978	LDLRAP1	low density lipoprotein receptor adaptor protein 1	early endosome|cytosol|neurofilament|cytoplasmic side of plasma membrane|basal plasma membrane|AP-1 adaptor complex|AP-2 adaptor complex|axon|recycling endosome|	transport|receptor-mediated endocytosis|cholesterol metabolic process|positive regulation of signal transduction|receptor internalization|cholesterol homeostasis|amyloid precursor protein metabolic process|regulation of protein binding|positive regulation of receptor-mediated endocytosis|regulation of establishment of protein localization to plasma membrane|receptor-mediated endocytosis of low-de…	beta-amyloid binding|phosphotyrosine binding|protein binding|phosphatidylinositol-4,5-bisphosphate binding|receptor signaling complex scaffold activity|clathrin binding|signaling adaptor activity|AP-2 adaptor complex binding|clathrin adaptor activity|low-density lipoprotein particle receptor binding|	10	2.3	12	9	0.4	4.27	2.2	9.92	0.0196	0.4	4.1	0	0	0
ENSG00000261594	TPBGL	trophoblast glycoprotein-like	integral component of membrane|	None	None	10	1	3.78	10	2.1	9.23	2	9.91	0.0196	0.6	3.7	0	0	0
ENSG00000077380	DYNC1I2	dynein, cytoplasmic 1, intermediate chain 2	cytoplasm|centrosome|cytosol|cytoplasmic dynein complex|microtubule|vesicle|	G2/M transition of mitotic cell cycle|mitotic cell cycle|transport|microtubule-based movement|metabolic process|metabolic process|viral process|antigen processing and presentation of exogenous peptide antigen via MHC class II|	microtubule motor activity|	9	1	3.33	9	1.5	7.62	1.1	9.9	0.0197	0.4	2.3	0	0	0
ENSG00000091844	RGS17	regulator of G-protein signaling 17	nucleus|cytoplasm|plasma membrane|	termination of G-protein coupled receptor signaling pathway|positive regulation of GTPase activity|	GTPase activator activity|	10	-1.3	7.24	10	-1.3	2.99	-1.3	9.89	0.0197	-2.3	-0.4	0	0	0
ENSG00000103042	SLC38A7	solute carrier family 38, member 7	integral component of membrane|axon|neuronal cell body|	sodium ion transport|asparagine transport|glutamine transport|branched-chain amino acid transport|L-alanine transport|aspartate transport|L-glutamate transport|histidine transport|methionine transport|L-serine transport|L-alpha-amino acid transmembrane transport|L-alpha-amino acid transmembrane transport|	L-histidine transmembrane transporter activity|L-glutamate transmembrane transporter activity|L-amino acid transmembrane transporter activity|L-alanine transmembrane transporter activity|L-asparagine transmembrane transporter activity|L-aspartate transmembrane transporter activity|L-glutamine transmembrane transporter activity|L-leucine transmembrane transporter activity|L-methionine transmembran…	10	-0.3	0.185	10	-1.6	11.5	-0.8	9.89	0.0197	-2.4	-0.3	0	0	0
ENSG00000229972	IQCF3	IQ motif containing F3	None	None	None	10	-0.4	0.829	10	1	10.4	1	9.88	0.0197	0.3	2.5	0	0	0
ENSG00000138587	MNS1	meiosis-specific nuclear structural 1	nuclear envelope|intermediate filament|axoneme|sperm flagellum|	meiotic nuclear division|cilium organization|left/right axis specification|	identical protein binding|	10	-3.1	3.14	10	-2	8.8	-2.1	9.88	0.0197	-5	-0.9	0	0	0
ENSG00000182518	FAM104B	family with sequence similarity 104, member B	None	None	None	9	1.6	5.92	9	-0.8	9.42	-0.9	9.87	0.0198	-3	1.7	0	0	0
ENSG00000258366	RTEL1	regulator of telomere elongation helicase 1	nucleus|	telomere maintenance|telomere maintenance|ATP catabolic process|DNA repair|regulation of double-strand break repair via homologous recombination|DNA duplex unwinding|DNA duplex unwinding|small molecule metabolic process|	DNA binding|ATP-dependent DNA helicase activity|protein binding|ATP binding|metal ion binding|4 iron, 4 sulfur cluster binding|	10	-1.2	2.81	10	-0.7	7.88	-0.7	9.87	0.0198	-1.9	-0.3	0	0	0
ENSG00000116473	RAP1A	RAP1A, member of RAS oncogene family	cytoplasm|early endosome|late endosome|cytosol|plasma membrane|cell junction|guanyl-nucleotide exchange factor complex|perinuclear region of cytoplasm|extracellular vesicular exosome|	activation of MAPKK activity|energy reserve metabolic process|GTP catabolic process|signal transduction|blood coagulation|positive regulation of neuron projection development|protein transport|platelet activation|Rap protein signal transduction|positive regulation of Rap GTPase activity|nerve growth factor signaling pathway|small molecule metabolic process|positive regulation of protein kinase ac…	GTPase activity|protein binding|GTP binding|protein transporter activity|Ras GTPase binding|Rap guanyl-nucleotide exchange factor activity|protein complex binding|	10	-0.7	4.45	10	-0.5	5.89	-0.7	9.87	0.0198	-1.4	-0.3	0	0	0
ENSG00000196371	FUT4	fucosyltransferase 4 (alpha (1,3) fucosyltransferase, myeloid-specific)	Golgi apparatus|cell surface|membrane|integral component of membrane|Golgi cisterna membrane|cell periphery|	carbohydrate metabolic process|protein glycosylation|protein glycosylation|fucosylation|fucosylation|L-fucose catabolic process|	fucosyltransferase activity|alpha-(1->3)-fucosyltransferase activity|	10	1.2	5.83	10	-1.7	11.3	-1.6	9.86	0.0199	-3	-0.7	0	0	0
ENSG00000134851	TMEM165	transmembrane protein 165	Golgi membrane|lysosomal membrane|Golgi apparatus|endosome membrane|integral component of membrane|early endosome membrane|late endosome membrane|trans-Golgi network membrane|intracellular membrane-bounded organelle|	protein N-linked glycosylation|cellular calcium ion homeostasis|Golgi calcium ion transport|regulation of lysosomal lumen pH|	None	10	-0.9	3.7	10	-0.6	6.88	-0.6	9.86	0.0199	-1.5	-0.2	0	0	0
ENSG00000120693	SMAD9	SMAD family member 9	intracellular|nucleus|nucleoplasm|transcription factor complex|cytosol|	ureteric bud development|response to hypoxia|Mullerian duct regression|transcription, DNA-templated|protein phosphorylation|transforming growth factor beta receptor signaling pathway|BMP signaling pathway|midbrain development|hindbrain development|intracellular signal transduction|positive regulation of cell differentiation|positive regulation of transcription, DNA-templated|cartilage development…	DNA binding|sequence-specific DNA binding transcription factor activity|protein binding|transforming growth factor beta receptor, pathway-specific cytoplasmic mediator activity|metal ion binding|	10	-0.5	0.978	10	1.7	11.9	0.8	9.85	0.0199	0.3	2.8	0	0	0
ENSG00000223501	VPS52	vacuolar protein sorting 52 homolog (S. cerevisiae)	Golgi apparatus|endosome membrane|	ectodermal cell differentiation|protein transport|embryonic ectodermal digestive tract development|	protein binding|	10	-0.9	3.49	10	-1.4	7.18	-1.4	9.85	0.0199	-2.9	-0.5	0	0	0
ENSG00000100201	DDX17	DEAD (Asp-Glu-Ala-Asp) box helicase 17	nucleus|nucleolus|membrane|	ATP catabolic process|ATP catabolic process|transcription, DNA-templated|RNA processing|positive regulation of intracellular estrogen receptor signaling pathway|positive regulation of transcription from RNA polymerase II promoter|regulation of skeletal muscle cell differentiation|	transcription coactivator activity|RNA binding|RNA helicase activity|protein binding|ATP binding|ATP-dependent helicase activity|RNA-dependent ATPase activity|estrogen receptor binding|poly(A) RNA binding|	10	-0.4	0.512	10	-1.1	10.9	-1	9.85	0.0199	-1.8	-0.4	0	0	0
ENSG00000197299	BLM	Bloom syndrome, RecQ helicase-like	nuclear chromosome|chromosome, telomeric region|lateral element|male germ cell nucleus|nucleus|replication fork|nucleolus|cytoplasm|nuclear matrix|PML body|PML body|pronucleus|	regulation of cyclin-dependent protein serine/threonine kinase activity|mitotic G2 phase|telomere maintenance|double-strand break repair via homologous recombination|DNA double-strand break processing|DNA strand renaturation|ATP catabolic process|ATP catabolic process|DNA repair|DNA recombination|cellular response to DNA damage stimulus|cellular response to DNA damage stimulus|response to X-ray|r…	bubble DNA binding|p53 binding|single-stranded DNA binding|ATP-dependent DNA helicase activity|ATP-dependent DNA helicase activity|helicase activity|protein binding|ATP binding|ATP-dependent helicase activity|four-way junction helicase activity|ATPase activity|annealing helicase activity|ATP-dependent 3'-5' DNA helicase activity|G-quadruplex DNA binding|	10	1.6	2.25	9	-1.2	10.6	-1.2	9.84	0.0199	-2.5	-0.5	0	0	0
ENSG00000177084	POLE	polymerase (DNA directed), epsilon, catalytic subunit	nucleus|nucleoplasm|cytoplasm|plasma membrane|epsilon DNA polymerase complex|	G1/S transition of mitotic cell cycle|G1/S transition of mitotic cell cycle|mitotic cell cycle|telomere maintenance via recombination|telomere maintenance|DNA synthesis involved in DNA repair|in utero embryonic development|DNA replication|DNA replication initiation|DNA repair|transcription-coupled nucleotide-excision repair|base-excision repair, gap-filling|nucleotide-excision repair|nucleotide-e…	nucleotide binding|DNA binding|chromatin binding|DNA-directed DNA polymerase activity|zinc ion binding|4 iron, 4 sulfur cluster binding|	10	-1	1.03	10	-1.5	9.19	-1.5	9.84	0.0199	-3.6	-0.7	0	0	0
ENSG00000205981	DNAJC19	DnaJ (Hsp40) homolog, subfamily C, member 19	mitochondrion|mitochondrial inner membrane|integral component of membrane|	protein folding|protein targeting to mitochondrion|protein targeting to mitochondrion|visual perception|cellular protein metabolic process|genitalia development|	None	9	-1.9	13.1	9	0.5	3.41	-1.8	9.83	0.02	-3.6	-0.9	0	0	0
ENSG00000176853	FAM91A1	family with sequence similarity 91, member A1	None	None	None	10	-0.2	0.155	10	-0.5	9.91	-0.5	9.83	0.02	-1	-0.2	0	0	0
ENSG00000128536	CDHR3	cadherin-related family member 3	plasma membrane|integral component of membrane|	homophilic cell adhesion|	calcium ion binding|	10	-1.9	13.2	10	1.3	4.33	-1.8	9.82	0.02	-4.4	-0.7	0	0	0
ENSG00000072958	AP1M1	adaptor-related protein complex 1, mu 1 subunit	Golgi membrane|lysosomal membrane|cytosol|membrane|clathrin adaptor complex|cytoplasmic vesicle membrane|clathrin-coated vesicle membrane|trans-Golgi network membrane|extracellular vesicular exosome|	intracellular protein transport|post-Golgi vesicle-mediated transport|viral process|antigen processing and presentation of exogenous peptide antigen via MHC class II|melanosome organization|endosome to melanosome transport|regulation of defense response to virus by virus|membrane organization|	protein binding|	10	-1.9	2.52	10	-1.7	7.68	-1.7	9.81	0.0201	-3.3	-0.6	0	0	0
ENSG00000135336	ORC3	origin recognition complex, subunit 3	origin recognition complex|nucleoplasm|nuclear origin of replication recognition complex|	G1/S transition of mitotic cell cycle|mitotic cell cycle|DNA replication|neural precursor cell proliferation|	DNA replication origin binding|protein binding|	7	-0.7	1.15	8	-0.9	9.06	-0.9	9.81	0.0201	-1.7	-0.4	0	0	0
ENSG00000187559	FOXD4L3	forkhead box D4-like 3	nucleus|	regulation of transcription, DNA-templated|transcription from RNA polymerase II promoter|	sequence-specific DNA binding transcription factor activity|sequence-specific DNA binding|	10	-1.1	3.5	10	-2.2	7.64	-2.1	9.81	0.0201	-3.6	-0.5	0	0	0
ENSG00000140575	IQGAP1	IQ motif containing GTPase activating protein 1	nucleus|cytoplasm|microtubule|actin filament|plasma membrane|plasma membrane|lateral plasma membrane|cell junction|midbody|extrinsic component of cytoplasmic side of plasma membrane|cell leading edge|slit diaphragm|cytoplasmic ribonucleoprotein granule|neuron projection|extracellular vesicular exosome|	regulation of cytokine production|energy reserve metabolic process|signal transduction|epidermal growth factor receptor signaling pathway|small GTPase mediated signal transduction|positive regulation of Ras GTPase activity|negative regulation of dephosphorylation|negative regulation of catalytic activity|positive regulation of GTPase activity|small molecule metabolic process|positive regulation o…	GTPase inhibitor activity|GTPase activator activity|Ras GTPase activator activity|calcium ion binding|protein binding|calmodulin binding|phosphatidylinositol-3,4,5-trisphosphate binding|protein kinase binding|protein phosphatase binding|protein complex binding|protein serine/threonine kinase activator activity|Rac GTPase binding|	10	1	2.88	10	0.7	7.58	0.7	9.8	0.0201	0.3	1.6	0	0	0
ENSG00000131236	CAP1	CAP, adenylate cyclase-associated protein 1 (yeast)	plasma membrane|cortical actin cytoskeleton|extracellular vesicular exosome|	ameboidal cell migration|platelet degranulation|receptor-mediated endocytosis|establishment or maintenance of cell polarity|signal transduction|activation of adenylate cyclase activity|axon guidance|blood coagulation|actin cytoskeleton organization|platelet activation|	actin binding|	10	0.4	0.856	10	1	9.74	1	9.79	0.0201	0.5	1.9	0	0	0
ENSG00000183208	GDPGP1	GDP-D-glucose phosphorylase 1	cytoplasm|	glucose metabolic process|positive regulation of GTPase activity|	nucleotide binding|guanyl-nucleotide exchange factor activity|nucleotidyltransferase activity|hydrolase activity|GDP-D-glucose phosphorylase activity|	10	1.3	4.57	10	0.7	6.81	0.8	9.78	0.0202	0.3	2	0	0	0
ENSG00000086598	TMED2	transmembrane emp24 domain trafficking protein 2	endoplasmic reticulum|endoplasmic reticulum membrane|endoplasmic reticulum-Golgi intermediate compartment|Golgi apparatus|integral component of membrane|COPI-coated vesicle|COPI-coated vesicle membrane|Golgi cisterna membrane|endoplasmic reticulum-Golgi intermediate compartment membrane|zymogen granule membrane|intracellular membrane-bounded organelle|	maternal placenta development|intracellular protein transport|ER to Golgi vesicle-mediated transport|Golgi organization|negative regulation of GTPase activity|cargo loading into vesicle|COPI coating of Golgi vesicle|COPII vesicle coating|embryonic morphogenesis|protein targeting to plasma membrane|	protein binding|	10	-1.2	5.77	9	-1	4.48	-1.1	9.78	0.0202	-3	0.7	0	0	0
ENSG00000256394	ASIC5	acid-sensing (proton-gated) ion channel family member 5	plasma membrane|integral component of membrane|	proton transport|ion transmembrane transport|sodium ion transmembrane transport|transmembrane transport|	hydrogen ion channel activity|ligand-gated sodium channel activity|	9	-1.2	3.19	10	-1.8	7.87	-1.7	9.77	0.0202	-2.9	-0.9	0	0	0
ENSG00000187257	RSBN1L	round spermatid basic protein 1-like	nucleus|	None	None	10	-1	3.4	9	-0.6	7.5	-0.6	9.77	0.0202	-1.4	-0.3	0	0	0
ENSG00000101413	RPRD1B	regulation of nuclear pre-mRNA domain containing 1B	nucleus|DNA-directed RNA polymerase II, holoenzyme|	transcription, DNA-templated|positive regulation of cell proliferation|regulation of cell cycle process|positive regulation of transcription from RNA polymerase II promoter|dephosphorylation of RNA polymerase II C-terminal domain|	RNA polymerase II core binding|protein binding|	10	-1.1	2.7	10	-1.6	8.17	-1.4	9.77	0.0202	-2.4	-0.3	0	0	0
ENSG00000112977	DAP	death-associated protein	None	autophagy|apoptotic process|activation of cysteine-type endopeptidase activity involved in apoptotic process|negative regulation of autophagy|negative regulation of NF-kappaB transcription factor activity|cellular response to amino acid starvation|negative regulation of transcription, DNA-templated|apoptotic signaling pathway|	death domain binding|	10	-1.2	7.93	10	-0.7	3.01	-1	9.76	0.0203	-2.2	-0.3	0	0	0
ENSG00000141985	SH3GL1	SH3-domain GRB2-like 1	podosome|cytoplasm|cell junction|early endosome membrane|cell projection|	endocytosis|signal transduction|central nervous system development|	protein binding|lipid binding|phosphatase binding|identical protein binding|GTPase binding|	8	-0.9	4.05	8	-1.1	6.18	-1	9.75	0.0203	-1.9	-0.5	0	0	0
ENSG00000103274	NUBP1	nucleotide binding protein 1	cytoplasm|cytosol|plasma membrane|extracellular vesicular exosome|	cellular iron ion homeostasis|negative regulation of centrosome duplication|cell growth|iron-sulfur cluster assembly|small molecule metabolic process|centrosome localization|protein localization to cell cortex|	nucleotide binding|protein binding|ATP binding|nucleoside-triphosphatase activity|metal ion binding|iron-sulfur cluster binding|4 iron, 4 sulfur cluster binding|	10	-1.1	2.81	10	-0.7	7.55	-0.8	9.75	0.0203	-2.7	1.2	0	0	0
ENSG00000268635	DKFZP434E1119	uncharacterized DKFZp434E1119	None	None	None	9	0.5	0.779	9	0.9	9.58	0.9	9.74	0.0203	0.4	1.8	0	0	0
ENSG00000156886	ITGAD	integrin, alpha D	plasma membrane|integrin complex|	immune response|cell adhesion|integrin-mediated signaling pathway|extracellular matrix organization|activated T cell proliferation|	metal ion binding|	10	-0.9	3.59	9	-1.2	6.73	-1.2	9.74	0.0203	-2.5	-0.3	0	0	0
ENSG00000115946	PNO1	partner of NOB1 homolog (S. cerevisiae)	nucleus|nucleolus|	None	poly(A) RNA binding|	9	-0.6	1.13	10	1.7	12	1.6	9.74	0.0203	0.6	2.9	0	0	0
ENSG00000012061	ERCC1	excision repair cross-complementation group 1	nucleotide-excision repair complex|nuclear chromosome, telomeric region|nucleus|nucleoplasm|transcription factor TFIID complex|cytoplasm|	nucleotide-excision repair, DNA damage removal|pyrimidine dimer repair by nucleotide-excision repair|DNA catabolic process, endonucleolytic|replicative cell aging|DNA repair|transcription-coupled nucleotide-excision repair|nucleotide-excision repair|nucleotide-excision repair|nucleotide-excision repair|nucleotide-excision repair, DNA incision, 3'-to lesion|nucleotide-excision repair, DNA incision…	single-stranded DNA endodeoxyribonuclease activity|TFIID-class transcription factor binding|damaged DNA binding|single-stranded DNA binding|protein binding|protein C-terminus binding|TBP-class protein binding|protein domain specific binding|structure-specific DNA binding|	9	-0.7	0.826	9	1.1	10.6	1.1	9.74	0.0203	0.5	1.9	0	0	0
ENSG00000124134	KCNS1	potassium voltage-gated channel, delayed-rectifier, subfamily S, member 1	plasma membrane|plasma membrane|voltage-gated potassium channel complex|	potassium ion transport|synaptic transmission|regulation of ion transmembrane transport|protein homooligomerization|potassium ion transmembrane transport|	delayed rectifier potassium channel activity|protein binding|potassium channel regulator activity|	10	0.7	1.76	10	2.4	11.1	2.4	9.73	0.0204	1.2	5	0	0	0
ENSG00000122026	RPL21	ribosomal protein L21	nucleolus|cytoplasm|cytosol|membrane|cytosolic large ribosomal subunit|	nuclear-transcribed mRNA catabolic process, nonsense-mediated decay|translation|translation|translational initiation|translational elongation|translational termination|SRP-dependent cotranslational protein targeting to membrane|gene expression|viral process|RNA metabolic process|mRNA metabolic process|viral life cycle|viral transcription|cellular protein metabolic process|	RNA binding|structural constituent of ribosome|poly(A) RNA binding|	6	2.3	4.42	5	1.4	6.7	1.5	9.72	0.0204	0.6	4.1	0	0	0
ENSG00000153187	HNRNPU	heterogeneous nuclear ribonucleoprotein U (scaffold attachment factor A)	nucleus|nucleoplasm|cell surface|membrane|ribonucleoprotein complex|cytoplasmic ribonucleoprotein granule|CRD-mediated mRNA stability complex|catalytic step 2 spliceosome|	mRNA splicing, via spliceosome|mRNA splicing, via spliceosome|osteoblast differentiation|RNA processing|RNA splicing|gene expression|CRD-mediated mRNA stabilization|	DNA binding|RNA binding|protein binding|ATP binding|poly(A) RNA binding|	9	-1.9	1.87	9	2	12	1.9	9.72	0.0204	0.4	3.6	0	0	0
ENSG00000168993	CPLX1	complexin 1	cytosol|dendrite|neuronal cell body|synapse|synaptobrevin 2-SNAP-25-syntaxin-1a-complexin I complex|	exocytosis|synaptic transmission|neurotransmitter secretion|glutamate secretion|synaptic vesicle exocytosis|insulin secretion|	neurotransmitter transporter activity|syntaxin-1 binding|	10	-0.6	1.21	10	-0.8	8.94	-0.8	9.72	0.0204	-1.5	-0.4	0	0	0
ENSG00000143772	ITPKB	inositol-trisphosphate 3-kinase B	cytosol|	MAPK cascade|signal transduction|cell surface receptor signaling pathway|inositol phosphate metabolic process|small molecule metabolic process|positive thymic T cell selection|positive regulation of Ras protein signal transduction|positive regulation of alpha-beta T cell differentiation|	protein binding|calmodulin binding|ATP binding|inositol-1,4,5-trisphosphate 3-kinase activity|	10	-0.6	1.54	10	-1.8	10.6	-1	9.72	0.0204	-3	-0.4	0	0	0
ENSG00000186973	FAM183A	family with sequence similarity 183, member A	None	None	None	10	2.6	13.4	10	-0.4	1.75	2.6	9.71	0.0205	1.3	5.6	0	0	0
ENSG00000153714	LURAP1L	leucine rich adaptor protein 1-like	None	None	None	9	-1.7	1.35	9	-1.1	8.7	-1.1	9.7	0.0205	-2.4	-0.4	0	0	0
ENSG00000148358	GPR107	G protein-coupled receptor 107	integral component of membrane|	None	None	9	-1.3	8.94	9	-0.8	1.8	-1.1	9.69	0.0206	-2.6	-0.4	0	0	0
ENSG00000245017	RP11-181C3.1	N/A	None	None	None	6	-1.8	9.56	6	-0.7	3.4	-1.7	9.69	0.0206	-3.3	-0.5	0	0	0
ENSG00000141499	WRAP53	WD repeat containing, antisense to TP53	nucleus|telomerase holoenzyme complex|cytoplasm|Cajal body|	telomere formation via telomerase|positive regulation of telomerase activity|	RNA binding|protein binding|	10	-0.3	0.304	10	-1.2	11.4	-1.2	9.67	0.0208	-1.9	-0.5	0	0	0
ENSG00000111011	RSRC2	arginine/serine-rich coiled-coil 2	None	None	poly(A) RNA binding|	10	1.5	9.68	9	1.1	0.609	1.2	9.67	0.0208	0.7	2.6	0	0	0
ENSG00000157106	SMG1	SMG1 phosphatidylinositol 3-kinase-related kinase	nucleus|cytoplasm|cytosol|	nuclear-transcribed mRNA catabolic process, nonsense-mediated decay|nuclear-transcribed mRNA catabolic process, nonsense-mediated decay|nuclear-transcribed mRNA catabolic process, nonsense-mediated decay|DNA repair|mRNA export from nucleus|response to stress|gene expression|RNA metabolic process|mRNA metabolic process|peptidyl-serine phosphorylation|peptidyl-serine phosphorylation|protein autopho…	protein kinase activity|protein serine/threonine kinase activity|protein serine/threonine kinase activity|protein serine/threonine kinase activity|protein binding|ATP binding|poly(A) RNA binding|metal ion binding|	10	-0.5	0.292	10	1	10.8	1	9.66	0.0209	0.4	1.7	0	0	0
ENSG00000151893	CACUL1	CDK2-associated, cullin domain 1	cullin-RING ubiquitin ligase complex|	G1/S transition of mitotic cell cycle|ubiquitin-dependent protein catabolic process|positive regulation of cell proliferation|positive regulation of protein kinase activity|	protein binding|protein kinase binding|ubiquitin protein ligase binding|	10	-1.3	2.37	10	-1	7.73	-1.1	9.66	0.0209	-2.5	-0.4	0	0	0
ENSG00000259133	RP11-1085N6.3	N/A	None	None	None	3	-1.6	4.51	3	1.1	5.76	-1.7	9.66	0.0209	-3	1	0	0	0
ENSG00000177700	POLR2L	polymerase (RNA) II (DNA directed) polypeptide L, 7.6kDa	nucleus|nucleoplasm|DNA-directed RNA polymerase II, core complex|DNA-directed RNA polymerase III complex|DNA-directed RNA polymerase I complex|cytosol|	mRNA splicing, via spliceosome|DNA repair|transcription-coupled nucleotide-excision repair|nucleotide-excision repair|regulation of transcription from RNA polymerase I promoter|transcription from RNA polymerase I promoter|transcription from RNA polymerase II promoter|transcription from RNA polymerase II promoter|transcription initiation from RNA polymerase II promoter|transcription elongation fro…	RNA polymerase I activity|RNA polymerase II activity|RNA polymerase III activity|DNA binding|DNA-directed RNA polymerase activity|zinc ion binding|	8	-2.1	8.67	8	1.2	7.68	1.2	9.66	0.0209	-2.7	4	0	0	0
ENSG00000169189	NSMCE1	non-SMC element 1 homolog (S. cerevisiae)	chromosome, telomeric region|nucleus|cytoplasm|Smc5-Smc6 complex|intracellular membrane-bounded organelle|	DNA repair|DNA recombination|protein ubiquitination|intracellular signal transduction|positive regulation of response to DNA damage stimulus|	ubiquitin-protein transferase activity|protein binding|zinc ion binding|ligase activity|	10	0	0	10	1.1	11.3	1	9.64	0.021	0.4	2.4	0	0	0
ENSG00000269494	AL359693.1	N/A	None	None	None	4	-0.1	0.0105	4	1.2	11.2	1.2	9.64	0.021	0.8	2	0	0	0
ENSG00000112697	TMEM30A	transmembrane protein 30A	endoplasmic reticulum|Golgi apparatus|membrane|integral component of membrane|apical plasma membrane|transport vesicle membrane|	drug transmembrane transport|protein localization to endosome|phospholipid translocation|positive regulation of protein exit from endoplasmic reticulum|	protein binding|	9	-0.9	3.06	9	-0.9	6.92	-0.9	9.63	0.0211	-1.8	-0.2	0	0	0
ENSG00000188612	SUMO2	small ubiquitin-like modifier 2	nucleoplasm|PML body|	protein sumoylation|protein sumoylation|positive regulation of proteasomal ubiquitin-dependent protein catabolic process|post-translational protein modification|cellular protein metabolic process|	protein binding|ubiquitin protein ligase binding|poly(A) RNA binding|	8	-0.9	6.01	9	-0.8	4.04	-0.8	9.62	0.0212	-1.7	-0.3	0	0	0
ENSG00000198026	ZNF335	zinc finger protein 335	nucleus|histone methyltransferase complex|	in utero embryonic development|positive regulation of neuroblast proliferation|transcription, DNA-templated|regulation of transcription, DNA-templated|brain development|cerebral cortex neuron differentiation|regulation of gene expression, epigenetic|neuron projection morphogenesis|brain morphogenesis|positive regulation of lymphocyte proliferation|positive regulation of neurogenesis|regulation of…	RNA polymerase II core promoter sequence-specific DNA binding|protein binding|transcription regulatory region DNA binding|metal ion binding|	10	0.6	3.12	10	0.8	6.88	0.7	9.62	0.0212	0.1	2	0	0	0
ENSG00000132467	UTP3	UTP3, small subunit (SSU) processome component, homolog (S. cerevisiae)	nucleus|nucleolus|	brain development|chromatin modification|	poly(A) RNA binding|	10	-1.2	3.53	10	-0.9	6.68	-1	9.6	0.0213	-1.9	-0.3	0	0	0
ENSG00000102879	CORO1A	coronin, actin binding protein, 1A	immunological synapse|phagocytic cup|cytoplasm|actin filament|plasma membrane|membrane|lamellipodium|phagocytic vesicle membrane|cortical actin cytoskeleton|protein complex|phagocytic vesicle|extracellular vesicular exosome|	phagolysosome assembly|calcium ion transport|phagocytosis|cellular component movement|actin filament organization|regulation of cell shape|actin cytoskeleton organization|positive regulation of cell migration|leukocyte chemotaxis|regulation of actin filament polymerization|cell-substrate adhesion|uropod organization|positive regulation of T cell proliferation|T cell homeostasis|innate immune resp…	protein binding|protein C-terminus binding|cytoskeletal protein binding|protein homodimerization activity|phosphatidylinositol 3-kinase binding|poly(A) RNA binding|actin filament binding|	10	-0.7	3.08	10	-0.6	6.92	-0.6	9.59	0.0213	-2.2	-0.3	0	0	0
ENSG00000008018	PSMB1	proteasome (prosome, macropain) subunit, beta type, 1	proteasome complex|nucleus|nucleoplasm|cytosol|proteasome core complex|extracellular vesicular exosome|	G1/S transition of mitotic cell cycle|protein polyubiquitination|mitotic cell cycle|antigen processing and presentation of peptide antigen via MHC class I|antigen processing and presentation of exogenous peptide antigen via MHC class I, TAP-dependent|regulation of cellular amino acid metabolic process|apoptotic process|DNA damage response, signal transduction by p53 class mediator resulting in ce…	threonine-type endopeptidase activity|protein binding|	10	1	2.97	9	-1.1	7.23	-1.2	9.58	0.0214	-3.5	-0.2	0	0	0
ENSG00000198887	SMC5	structural maintenance of chromosomes 5	chromosome, telomeric region|nucleus|nucleus|PML body|cell junction|Smc5-Smc6 complex|	telomere maintenance via recombination|double-strand break repair via homologous recombination|mitotic nuclear division|positive regulation of maintenance of mitotic sister chromatid cohesion|positive regulation of mitotic metaphase/anaphase transition|cellular senescence|	protein binding|ATP binding|	9	-2.5	4.21	10	-1	7.4	-1	9.58	0.0214	-3.5	-0.3	0	0	0
ENSG00000089048	ESF1	ESF1, nucleolar pre-rRNA processing protein, homolog (S. cerevisiae)	extracellular space|nucleoplasm|nucleolus|	transcription, DNA-templated|regulation of transcription, DNA-templated|	poly(A) RNA binding|	8	-2.3	3.67	9	0.8	8.75	0.9	9.58	0.0214	0.3	2.5	0	0	0
ENSG00000213516	RBMXL1	RNA binding motif protein, X-linked-like 1	nucleus|ribonucleoprotein complex|	mRNA processing|RNA splicing|	nucleotide binding|RNA binding|	10	-1.9	5.04	10	-1.2	5.69	-1.4	9.57	0.0215	-3	-0.6	0	0	0
ENSG00000184162	NR2C2AP	nuclear receptor 2C2-associated protein	nucleoplasm|extracellular vesicular exosome|	transcription initiation from RNA polymerase II promoter|cell adhesion|gene expression|	protein binding|	10	0.9	4.16	10	0.7	6.05	0.8	9.56	0.0215	0.3	1.5	0	0	0
ENSG00000180611	MB21D2	Mab-21 domain containing 2	None	None	protein complex binding|	9	-0.7	2.11	9	1.2	12.2	1.2	9.54	0.0217	0.6	2	0	0	0
ENSG00000105726	ATP13A1	ATPase type 13A1	cellular_component|endoplasmic reticulum membrane|membrane|integral component of membrane|	ATP catabolic process|cation transport|biological_process|	molecular_function|ATP binding|cation-transporting ATPase activity|metal ion binding|	10	-2	7.85	10	-1.2	3.33	-1.6	9.53	0.0217	-3.3	-0.6	0	0	0
ENSG00000269404	SPIB	Spi-B transcription factor (Spi-1/PU.1 related)	nucleus|cytoplasm|	regulation of transcription from RNA polymerase II promoter|transcription from RNA polymerase II promoter|cell differentiation|	sequence-specific DNA binding RNA polymerase II transcription factor activity|sequence-specific DNA binding|	9	2	5.48	9	1.7	4.76	1.8	9.52	0.0218	0.8	4.3	0	0	0
ENSG00000118707	TGIF2	TGFB-induced factor homeobox 2	nucleus|nucleus|nucleoplasm|	negative regulation of transcription from RNA polymerase II promoter|negative regulation of transcription from RNA polymerase II promoter|transcription, DNA-templated|regulation of transcription, DNA-templated|transcription initiation from RNA polymerase II promoter|transforming growth factor beta receptor signaling pathway|gene expression|	sequence-specific DNA binding transcription factor activity|sequence-specific DNA binding|	7	2.2	8.35	7	0.7	3.98	1	9.52	0.0218	0.4	3.7	0	0	0
ENSG00000157131	C8A	complement component 8, alpha polypeptide	extracellular region|membrane attack complex|extracellular space|membrane|blood microparticle|	immune response|complement activation|complement activation, alternative pathway|complement activation, classical pathway|cytolysis|regulation of complement activation|innate immune response|	complement binding|protein complex binding|	10	3.6	12.9	10	0.2	0.0446	3.6	9.51	0.0218	0.6	7	0	0	0
ENSG00000119541	VPS4B	vacuolar protein sorting 4 homolog B (S. cerevisiae)	nucleus|cytoplasm|lysosome|endosome|early endosome|late endosome|vacuolar membrane|cytosol|cytosol|endosome membrane|late endosome membrane|extracellular vesicular exosome|	ATP catabolic process|potassium ion transport|endosome organization|cell cycle|protein transport|viral process|endosomal transport|endosomal transport|endosomal transport|viral life cycle|intracellular cholesterol transport|endosome to lysosome transport via multivesicular body sorting pathway|response to lipid|regulation of viral process|cell division|membrane organization|positive regulation of…	protein binding|ATP binding|protein C-terminus binding|ATPase activity|ATPase activity|ATPase activity, coupled|	10	-1	3.58	10	-0.6	7.01	-0.7	9.51	0.0218	-1.5	-0.3	0	0	0
ENSG00000178741	COX5A	cytochrome c oxidase subunit Va	mitochondrial inner membrane|extracellular vesicular exosome|	respiratory electron transport chain|cellular metabolic process|small molecule metabolic process|hydrogen ion transmembrane transport|hydrogen ion transmembrane transport|	cytochrome-c oxidase activity|electron carrier activity|metal ion binding|	10	-1.9	0.826	9	-1.4	9.08	-1.4	9.5	0.0219	-3.2	-0.6	0	0	0
ENSG00000177225	PDDC1	Parkinson disease 7 domain containing 1	extracellular vesicular exosome|	biological_process|	molecular_function|	10	1.3	6.29	10	1.2	3.66	1.2	9.5	0.0219	0.4	2.4	0	0	0
ENSG00000163444	TMEM183A	transmembrane protein 183A	integral component of membrane|	None	None	10	1	6.09	10	0.9	3.87	0.9	9.5	0.0219	0.4	2	0	0	0
ENSG00000205423	CNEP1R1	CTD nuclear envelope phosphatase 1 regulatory subunit 1	cytoplasm|integral component of membrane|nuclear membrane|Nem1-Spo7 phosphatase complex|	lipid metabolic process|positive regulation of triglyceride biosynthetic process|protein localization to nucleus|positive regulation of protein dephosphorylation|	protein binding|	10	0.9	2.32	10	0.8	7.5	0.8	9.48	0.022	0.3	1.6	0	0	0
ENSG00000187741	FANCA	Fanconi anemia, complementation group A	nucleus|nucleoplasm|nucleolus|cytoplasm|Fanconi anaemia nuclear complex|	DNA repair|protein complex assembly|male meiosis|male gonad development|female gonad development|regulation of cell proliferation|	protein binding|	10	2.6	1.78	10	-1.3	10.6	-1.2	9.48	0.022	-2	-0.6	0	0	0
ENSG00000100425	BRD1	bromodomain containing 1	nucleus|nucleus|MOZ/MORF histone acetyltransferase complex|	histone H3 acetylation|	zinc ion binding|histone binding|	10	0.7	4.45	10	0.5	5.59	0.6	9.46	0.0221	0.2	1.5	0	0	0
ENSG00000131969	ABHD12B	abhydrolase domain containing 12B	None	metabolic process|	hydrolase activity|	10	1.1	3.1	10	0.9	6.96	0.9	9.46	0.0221	0.4	2	0	0	0
ENSG00000129810	SGOL1	shugoshin-like 1 (S. pombe)	chromosome, centromeric region|kinetochore|kinetochore|condensed chromosome kinetochore|condensed chromosome, centromeric region|condensed nuclear chromosome, centromeric region|spindle pole|nucleus|cytoplasm|centrosome|cytosol|mitotic cohesin complex|	mitotic cell cycle|chromosome segregation|mitotic nuclear division|attachment of spindle microtubules to kinetochore|centriole-centriole cohesion|centriole-centriole cohesion|meiotic chromosome segregation|	protein binding|kinase binding|	10	-1.2	6.5	9	-0.6	4.45	-0.9	9.44	0.0223	-2.1	-0.3	0	0	0
ENSG00000169972	PUSL1	pseudouridylate synthase-like 1	None	pseudouridine synthesis|tRNA processing|	RNA binding|pseudouridine synthase activity|	10	2.9	2.82	10	-1.3	11.1	-1.2	9.44	0.0223	-2	-0.4	0	0	0
ENSG00000163930	BAP1	BRCA1 associated protein-1 (ubiquitin carboxy-terminal hydrolase)	nucleus|cytoplasm|PR-DUB complex|	regulation of cell growth|cellular protein modification process|ubiquitin-dependent protein catabolic process|negative regulation of cell proliferation|protein deubiquitination|monoubiquitinated protein deubiquitination|monoubiquitinated histone H2A deubiquitination|regulation of cell cycle|protein K48-linked deubiquitination|	chromatin binding|ubiquitin thiolesterase activity|ubiquitin thiolesterase activity|ubiquitin-specific protease activity|protein binding|peptidase activity|	10	0.8	1.1	10	-1.2	9.08	-1	9.43	0.0223	-2.3	-0.4	0	0	0
ENSG00000185813	PCYT2	phosphate cytidylyltransferase 2, ethanolamine	cellular_component|endoplasmic reticulum membrane|	phospholipid metabolic process|phosphatidylethanolamine biosynthetic process|phosphatidylethanolamine biosynthetic process|phospholipid biosynthetic process|small molecule metabolic process|glycerophospholipid biosynthetic process|	ethanolamine-phosphate cytidylyltransferase activity|	10	-2.4	1.44	10	2.1	12.4	2.1	9.43	0.0223	-3	4	0	0	0
ENSG00000143977	SNRPG	small nuclear ribonucleoprotein polypeptide G	nucleoplasm|spliceosomal complex|U7 snRNP|U1 snRNP|U4 snRNP|U12-type spliceosomal complex|cytosol|cytosol|small nuclear ribonucleoprotein complex|methylosome|SMN-Sm protein complex|catalytic step 2 spliceosome|	spliceosomal complex assembly|spliceosomal snRNP assembly|spliceosomal snRNP assembly|mRNA splicing, via spliceosome|mRNA splicing, via spliceosome|transcription from RNA polymerase II promoter|termination of RNA polymerase II transcription|histone mRNA metabolic process|RNA splicing|gene expression|RNA metabolic process|mRNA 3'-end processing|ncRNA metabolic process|	protein binding|poly(A) RNA binding|	9	-2.1	2.91	7	-1.5	7.06	-1.5	9.42	0.0224	-3.3	-0.4	0	0	0
ENSG00000125656	CLPP	caseinolytic mitochondrial matrix peptidase proteolytic subunit	mitochondrion|mitochondrial matrix|endopeptidase Clp complex|	protein homooligomerization|proteolysis involved in cellular protein catabolic process|	serine-type endopeptidase activity|protein binding|peptidase activity|identical protein binding|	10	-1.7	2.52	10	-0.8	8.54	-0.8	9.42	0.0224	-2.2	-0.3	0	0	0
ENSG00000104738	MCM4	minichromosome maintenance complex component 4	nucleus|nucleus|nucleoplasm|membrane|MCM complex|	G1/S transition of mitotic cell cycle|mitotic cell cycle|DNA replication|DNA replication|DNA unwinding involved in DNA replication|DNA replication initiation|DNA strand elongation involved in DNA replication|	single-stranded DNA binding|ATP-dependent DNA helicase activity|protein binding|ATP binding|	10	-0.6	0.833	10	-0.6	8.84	-0.6	9.42	0.0224	-1.3	-0.2	0	0	0
ENSG00000133816	MICAL2	microtubule associated monooxygenase, calponin and LIM domain containing 2	nucleus|	heart looping|cytoskeleton organization|heart development|positive regulation of transcription via serum response element binding|sulfur oxidation|sulfur oxidation|actin filament depolymerization|actin filament depolymerization|oxidation-reduction process|	actin binding|actin binding|zinc ion binding|oxidoreductase activity, acting on paired donors, with incorporation or reduction of molecular oxygen, NAD(P)H as one donor, and incorporation of one atom of oxygen|NADPH:sulfur oxidoreductase activity|FAD binding|	10	1	7.03	10	1.1	2.73	1.1	9.41	0.0225	0.3	2.3	0	0	0
ENSG00000134744	ZCCHC11	zinc finger, CCHC domain containing 11	extracellular space|nucleolus|cytoplasm|extracellular vesicular exosome|	cytokine production|miRNA metabolic process|miRNA catabolic process|stem cell maintenance|pre-miRNA processing|RNA 3'-end processing|regulation of lipopolysaccharide-mediated signaling pathway|negative regulation of NF-kappaB transcription factor activity|positive regulation of interleukin-6 production|interleukin-6-mediated signaling pathway|	protein binding|zinc ion binding|poly(A) RNA binding|RNA uridylyltransferase activity|	10	0.4	1.04	10	-2.2	11.6	-2.2	9.41	0.0225	-4	-1.4	0	0	0
ENSG00000253379	RP11-1102P16.1	N/A	None	None	None	8	1.4	6.39	9	1.1	3.55	1.2	9.39	0.0226	-0.8	3	0	0	0
ENSG00000130487	KLHDC7B	kelch domain containing 7B	None	None	None	9	-1.7	0.248	9	-1.5	9.4	-1.6	9.39	0.0226	-2.9	-0.5	0	0	0
ENSG00000167800	TBX10	T-box 10	nucleus|	transcription, DNA-templated|regulation of transcription from RNA polymerase II promoter|anatomical structure morphogenesis|	DNA binding|sequence-specific DNA binding transcription factor activity|	9	1.9	4.16	9	-1.8	10.8	-1.7	9.39	0.0226	-3	-0.6	0	0	0
ENSG00000186150	UBL4B	ubiquitin-like 4B	cytoplasm|	None	None	10	1	2.7	10	2.2	8.96	2.1	9.39	0.0226	1.1	4	0	0	0
ENSG00000187545	PRAMEF10	PRAME family member 10	None	positive regulation of cell proliferation|negative regulation of apoptotic process|negative regulation of cell differentiation|negative regulation of transcription, DNA-templated|negative regulation of retinoic acid receptor signaling pathway|	retinoic acid receptor binding|	10	-0.7	3.71	9	-0.7	6.03	-0.7	9.38	0.0226	-1.4	-0.3	0	0	0
ENSG00000146592	CREB5	cAMP responsive element binding protein 5	nucleus|extracellular vesicular exosome|	transcription from RNA polymerase II promoter|fat cell differentiation|positive regulation of transcription, DNA-templated|positive regulation of transcription from RNA polymerase II promoter|adipose tissue development|	RNA polymerase II core promoter proximal region sequence-specific DNA binding transcription factor activity involved in positive regulation of transcription|sequence-specific DNA binding transcription factor activity|protein binding|sequence-specific DNA binding|metal ion binding|	10	0.7	3.69	10	0.7	6.05	0.7	9.38	0.0226	0.2	1.3	0	0	0
ENSG00000073150	PANX2	pannexin 2	cytoplasm|plasma membrane|gap junction|integral component of membrane|	response to ischemia|ion transport|synaptic transmission|protein hexamerization|transmembrane transport|	gap junction hemi-channel activity|	10	-0.8	2	10	-1	7.83	-1	9.38	0.0226	-1.9	-0.3	0	0	0
ENSG00000108559	NUP88	nucleoporin 88kDa	nucleus|nuclear pore|cytosol|	mitotic cell cycle|carbohydrate metabolic process|mitotic nuclear envelope disassembly|hexose transport|regulation of glucose transport|protein transport|glucose transport|viral process|cytokine-mediated signaling pathway|small molecule metabolic process|mRNA transport|transmembrane transport|	transporter activity|	9	-1.1	4.47	8	-0.6	6.6	-0.7	9.38	0.0226	-1.6	-0.3	0	0	0
ENSG00000112658	SRF	serum response factor (c-fos serum response element-binding transcription factor)	nuclear chromatin|nucleus|cytoplasm|	patterning of blood vessels|response to hypoxia|mesoderm formation|neuron migration|trophectodermal cell differentiation|heart looping|morphogenesis of an epithelial sheet|cell migration involved in sprouting angiogenesis|positive regulation of transcription from RNA polymerase II promoter involved in myocardial precursor cell differentiation|transcription from RNA polymerase II promoter|cell-mat…	RNA polymerase II core promoter proximal region sequence-specific DNA binding|RNA polymerase II core promoter sequence-specific DNA binding transcription factor activity|RNA polymerase II transcription factor binding transcription factor activity|RNA polymerase II core promoter proximal region sequence-specific DNA binding transcription factor activity involved in positive regulation of transcrip…	9	-1.8	3.9	8	1.4	9.47	1.3	9.38	0.0226	0.4	2.8	0	0	0
ENSG00000139154	AEBP2	AE binding protein 2	ESC/E(Z) complex|	transcription, DNA-templated|regulation of transcription, DNA-templated|chromatin modification|	DNA binding|transcription corepressor activity|metal ion binding|	10	-0.5	0.305	10	-1	9.57	-1	9.38	0.0226	-1.8	-0.4	0	0	0
ENSG00000060688	SNRNP40	small nuclear ribonucleoprotein 40kDa (U5)	nucleus|nucleoplasm|U5 snRNP|small nucleolar ribonucleoprotein complex|cytoplasm|catalytic step 2 spliceosome|	RNA splicing, via transesterification reactions|mRNA splicing, via spliceosome|mRNA splicing, via spliceosome|RNA processing|RNA splicing|gene expression|	protein binding|poly(A) RNA binding|	9	1.4	3.12	8	0.8	6.91	0.9	9.36	0.0228	0.3	2.1	0	0	0
ENSG00000147133	TAF1	TAF1 RNA polymerase II, TATA box binding protein (TBP)-associated factor, 250kDa	nucleus|nucleoplasm|transcription factor TFIID complex|MLL1 complex|	regulation of transcription involved in G2/M transition of mitotic cell cycle|DNA-templated transcription, initiation|transcription from RNA polymerase II promoter|transcription initiation from RNA polymerase II promoter|transcription elongation from RNA polymerase II promoter|cellular response to DNA damage stimulus|gene expression|viral process|histone acetylation|histone acetylation|peptidyl-s…	p53 binding|transcription coactivator activity|histone acetyltransferase activity|protein serine/threonine kinase activity|protein binding|ATP binding|transcription factor binding|TBP-class protein binding|sequence-specific DNA binding|transcription regulatory region DNA binding|lysine-acetylated histone binding|	10	-1.4	7.07	10	-1.5	2.63	-1.4	9.36	0.0228	-2.9	-0.4	0	0	0
ENSG00000143870	PDIA6	protein disulfide isomerase family A, member 6	endoplasmic reticulum|endoplasmic reticulum|endoplasmic reticulum lumen|endoplasmic reticulum membrane|endoplasmic reticulum-Golgi intermediate compartment|plasma membrane|melanosome|extracellular vesicular exosome|	protein folding|activation of signaling protein activity involved in unfolded protein response|endoplasmic reticulum unfolded protein response|response to endoplasmic reticulum stress|apoptotic cell clearance|cellular protein metabolic process|cell redox homeostasis|	protein disulfide isomerase activity|protein binding|	10	3	3.36	10	0.7	8.55	0.7	9.36	0.0228	0.2	3.4	0	0	0
[truncated: 19,623 more rows]
