# Supplementary material for: Inter-cellular CRISPR screens reveal regulators of cancer cell phagocytosis
Source: Springer Nature journal article supplement (doi:10.1038/s41586-021-03879-4), 2021-09-08
Supplement: MOESM7 [file 41586_2021_3879_MOESM7_ESM%20(1).xlsx]

## Sheet: Ext Data Fig 3a
#GeneID	Symbol	GeneInfo	Localization	Process	Function	# elements 1	casTLE Effect 1	casTLE Score 1	# elements 2	casTLE Effect 2	casTLE Score 2	Combo casTLE Effect	Combo casTLE Score	casTLE p-value	Minimum Effect Estimate	Maximum Effect Estimate	10% FDR	5% FDR	1% FDR
ENSG00000196776	CD47	CD47 molecule	plasma membrane|integral component of plasma membrane|extracellular vesicular exosome|	cell adhesion|integrin-mediated signaling pathway|blood coagulation|opsonization|positive regulation of cell proliferation|response to bacterium|positive regulation of cell-cell adhesion|extracellular matrix organization|positive regulation of inflammatory response|positive regulation of phagocytosis|positive regulation of T cell activation|leukocyte migration|	protein binding|thrombospondin receptor activity|	10	-3.8	220	10	-3.8	212	-3.8	432	1e-05	-4.5	-3.5	1	1	0
ENSG00000101474	APMAP	adipocyte plasma membrane associated protein	cell surface|membrane|integral component of membrane|extracellular vesicular exosome|	biological_process|biosynthetic process|	arylesterase activity|strictosidine synthase activity|	10	-1.4	33.6	10	-1.3	33	-1.3	66.1	1e-05	-1.8	-1.1	1	1	0
ENSG00000008838	MED24	mediator complex subunit 24	nucleus|nucleoplasm|mediator complex|	regulation of transcription from RNA polymerase II promoter|transcription initiation from RNA polymerase II promoter|transcription initiation from RNA polymerase II promoter|gene expression|histone acetylation|stem cell maintenance|intracellular steroid hormone receptor signaling pathway|androgen receptor signaling pathway|positive regulation of transcription, DNA-templated|protein heterooligomer…	RNA polymerase II transcription cofactor activity|transcription cofactor activity|histone acetyltransferase activity|receptor activity|ligand-dependent nuclear receptor transcription coactivator activity|vitamin D receptor binding|thyroid hormone receptor binding|	10	-2	22.4	10	-1.2	11.5	-1.9	30.8	0.00013	-3	-0.7	1	0	0
ENSG00000140326	CDAN1	codanin 1	nucleus|cytoplasm|plasma membrane|endomembrane system|integral component of membrane|	chromatin organization|protein localization|negative regulation of DNA replication|chromatin assembly|	protein binding|	10	1.4	31.9	8	-2	15	1.3	30.8	0.00013	0.9	2	1	0	0
ENSG00000162298	SYVN1	synovial apoptosis inhibitor 1, synoviolin	nucleus|endoplasmic reticulum|endoplasmic reticulum membrane|membrane|integral component of membrane|	in utero embryonic development|activation of signaling protein activity involved in unfolded protein response|protein ubiquitination|protein N-linked glycosylation via asparagine|ER-associated ubiquitin-dependent protein catabolic process|ER-associated ubiquitin-dependent protein catabolic process|endoplasmic reticulum unfolded protein response|cellular protein metabolic process|negative regulati…	protein binding|zinc ion binding|acid-amino acid ligase activity|	10	1.3	31.1	10	0.2	2.35	1.3	29.3	0.00015	0.6	2	1	0	0
ENSG00000153485	TMEM251	transmembrane protein 251	integral component of membrane|	None	None	10	-1	6.49	10	-1.6	25.1	-1.4	29.1	0.00016	-2.4	-0.9	1	0	0
ENSG00000197324	LRP10	low density lipoprotein receptor-related protein 10	coated pit|membrane|integral component of membrane|	endocytosis|	None	10	-2	15.9	10	-1.6	14.7	-1.9	28.9	0.00019	-3.5	-1.3	1	0	0
ENSG00000159110	IFNAR2	interferon (alpha, beta and omega) receptor 2	extracellular region|extracellular space|extracellular space|plasma membrane|integral component of plasma membrane|	regulation of transcription from RNA polymerase II promoter|cell surface receptor signaling pathway|JAK-STAT cascade|cell proliferation|response to virus|cytokine-mediated signaling pathway|response to interferon-alpha|type I interferon signaling pathway|regulation of type I interferon-mediated signaling pathway|	type I interferon receptor activity|protein binding|protein kinase binding|type I interferon binding|	10	-2	18.5	10	-1.2	11	-1.9	26.9	0.00029	-3.3	-0.8	0	0	0
ENSG00000243279	PRAF2	PRA1 domain family, member 2	endosome membrane|integral component of membrane|	protein transport|L-glutamate transport|	None	6	-1.5	18	6	-1.3	7.84	-1.4	25.2	0.00042	-2.6	-1	0	0	0
ENSG00000176246	OR4L1	olfactory receptor, family 4, subfamily L, member 1	plasma membrane|integral component of membrane|	G-protein coupled receptor signaling pathway|detection of chemical stimulus involved in sensory perception of smell|	G-protein coupled receptor activity|olfactory receptor activity|	10	-2.1	20.9	10	-1.2	5.63	-2.1	24.3	0.00055	-3.9	-1.4	0	0	0
ENSG00000161807	OR7G1	olfactory receptor, family 7, subfamily G, member 1	plasma membrane|integral component of membrane|	G-protein coupled receptor signaling pathway|detection of chemical stimulus involved in sensory perception of smell|	G-protein coupled receptor activity|olfactory receptor activity|	10	-0.8	17.1	10	-0.7	7.31	-0.7	23.9	0.0006	-1.1	-0.5	0	0	0
ENSG00000169964	TMEM42	transmembrane protein 42	integral component of membrane|	None	None	10	-0.5	6.23	10	-1.8	22.9	-0.3	23.1	0.0008	-2.7	-0.2	0	0	0
ENSG00000189068	VSTM1	V-set and transmembrane domain containing 1	extracellular space|integral component of membrane|	immune system process|	cytokine activity|	10	-0.8	2	10	-1.8	23	-1.8	22.6	0.00097	-3	-0.3	0	0	0
ENSG00000172938	MRGPRD	MAS-related GPR, member D	extracellular space|plasma membrane|integral component of membrane|	G-protein coupled receptor signaling pathway|	G-protein coupled receptor activity|	10	-1.4	2.64	10	-1.8	20.8	-1.8	22.4	0.00103	-3	-1.3	0	0	0
ENSG00000077454	LRCH4	leucine-rich repeats and calponin homology (CH) domain containing 4	PML body|	nervous system development|	protein binding|	9	-2.3	23.5	9	-0.3	0.427	-2.3	20.4	0.00203	-4	-1.3	0	0	0
ENSG00000204681	GABBR1	gamma-aminobutyric acid (GABA) B receptor, 1	extracellular region|cytoplasm|plasma membrane|integral component of plasma membrane|cell junction|dendrite|G-protein coupled receptor heterodimeric complex|presynaptic membrane|postsynaptic membrane|	adenylate cyclase-inhibiting G-protein coupled receptor signaling pathway|negative regulation of adenylate cyclase activity|gamma-aminobutyric acid signaling pathway|synaptic transmission|	G-protein coupled GABA receptor activity|G-protein coupled GABA receptor activity|protein binding|	9	1.4	21.9	9	0.4	2.67	1.3	20.3	0.00214	0.3	1.9	0	0	0
ENSG00000183255	PTTG1IP	pituitary tumor-transforming 1 interacting protein	nucleus|cytoplasm|membrane|integral component of membrane|extracellular vesicular exosome|	protein import into nucleus|multicellular organismal development|	molecular_function|receptor activity|	10	-2.4	23.6	10	0.3	1.91	-2.4	20.1	0.00237	-4	-1.8	0	0	0
ENSG00000204703	OR2B3	olfactory receptor, family 2, subfamily B, member 3	plasma membrane|integral component of membrane|	G-protein coupled receptor signaling pathway|detection of chemical stimulus involved in sensory perception of smell|	G-protein coupled receptor activity|olfactory receptor activity|	10	1.4	23.2	10	-0.1	0.821	1.4	20	0.00247	0.6	2	0	0	0
ENSG00000182334	OR5P3	olfactory receptor, family 5, subfamily P, member 3	plasma membrane|integral component of membrane|	G-protein coupled receptor signaling pathway|detection of chemical stimulus involved in sensory perception of smell|	G-protein coupled receptor activity|olfactory receptor activity|	10	1.4	23.4	10	-0.5	3.49	1.4	19.9	0.00264	0.6	2	0	0	0
ENSG00000197790	OR52M1	olfactory receptor, family 52, subfamily M, member 1	plasma membrane|integral component of membrane|	G-protein coupled receptor signaling pathway|detection of chemical stimulus involved in sensory perception of smell|	G-protein coupled receptor activity|olfactory receptor activity|	10	1.4	23	10	-0.1	0.049	1.4	19.6	0.00294	0.5	2	0	0	0
ENSG00000106330	MOSPD3	motile sperm domain containing 3	integral component of membrane|	heart development|	structural molecule activity|	10	-1	12.8	10	-0.9	6.57	-1	18.9	0.00414	-1.6	-0.6	0	0	0
ENSG00000174339	OR2Y1	olfactory receptor, family 2, subfamily Y, member 1	plasma membrane|integral component of membrane|	G-protein coupled receptor signaling pathway|detection of chemical stimulus involved in sensory perception of smell|	G-protein coupled receptor activity|olfactory receptor activity|	10	-0.8	2.3	10	2	22.3	2	18.8	0.00428	1.6	4	0	0	0
ENSG00000136156	ITM2B	integral membrane protein 2B	extracellular region|extracellular space|Golgi apparatus|plasma membrane|endosome membrane|membrane|Golgi-associated vesicle membrane|integral component of organelle membrane|intracellular membrane-bounded organelle|extracellular vesicular exosome|	nervous system development|negative regulation of amyloid precursor protein biosynthetic process|extrinsic apoptotic signaling pathway in absence of ligand|	beta-amyloid binding|protein binding|ATP binding|	10	1.4	21.3	10	0.3	1.67	1.4	18.6	0.00465	0.3	2.8	0	0	0
ENSG00000181061	HIGD1A	HIG1 hypoxia inducible domain family, member 1A	mitochondrial inner membrane|integral component of membrane|protein complex|respiratory chain|	response to stress|negative regulation of apoptotic process|oxidation-reduction process|	None	10	-0.6	12.9	10	-1.5	8.63	-0.8	18.2	0.00559	-1.7	-0.4	0	0	0
ENSG00000144730	IL17RD	interleukin 17 receptor D	Golgi membrane|nucleus|Golgi apparatus|plasma membrane|integral component of membrane|	signal transduction|	None	10	0	0	10	-2	20.9	-2	17.5	0.00783	-4	-1.4	0	0	0
ENSG00000158292	GPR153	G protein-coupled receptor 153	plasma membrane|integral component of membrane|	G-protein coupled receptor signaling pathway|	G-protein coupled receptor activity|	10	1.5	20.7	10	0.1	0.121	1.4	17.4	0.00804	0.9	3	0	0	0
ENSG00000244045	TMEM199	transmembrane protein 199	integral component of membrane|	None	None	10	0.5	9.07	10	0.7	8.73	0.6	17.2	0.00857	0.3	1	0	0	0
ENSG00000063015	SEZ6	seizure related 6 homolog (mouse)	extracellular space|endoplasmic reticulum|plasma membrane|integral component of membrane|neuronal cell body|dendritic spine|dendritic shaft|	adult locomotory behavior|cerebellar Purkinje cell layer development|synapse maturation|regulation of excitatory postsynaptic membrane potential|regulation of protein kinase C signaling|positive regulation of dendrite development|negative regulation of dendrite development|	None	10	0.6	5.87	10	1.1	12.8	0.7	16.7	0.00987	0.4	1.6	0	0	0
ENSG00000204967	PCDHA4	protocadherin alpha 4	integral component of plasma membrane|	cell adhesion|homophilic cell adhesion|nervous system development|	calcium ion binding|	9	1.4	19.9	9	0	0	1.3	16.6	0.01	0.5	2	0	0	0
ENSG00000214511	HIGD1C	HIG1 hypoxia inducible domain family, member 1C	integral component of membrane|	None	None	8	1.3	16.8	8	0.6	1.78	1.3	16.3	0.0103	0.4	2	0	0	0
ENSG00000221970	OR2A1	olfactory receptor, family 2, subfamily A, member 1	None	None	None	10	0.2	0.689	10	-1.7	19.3	-1.7	15.7	0.0111	-3	-1	0	0	0
ENSG00000131748	STARD3	StAR-related lipid transfer (START) domain containing 3	cytoplasm|mitochondrion|lysosomal membrane|integral component of membrane|late endosome membrane|	lipid metabolic process|progesterone biosynthetic process|mitochondrial transport|steroid metabolic process|cholesterol metabolic process|cholesterol transport|	cholesterol binding|cholesterol transporter activity|	10	1.3	18.6	10	-0.1	0.0563	1.3	15.2	0.0117	0.4	2	0	0	0
ENSG00000260272	RP11-20I23.1	N/A	None	None	None	10	0.7	5.82	10	0.9	9.28	0.8	14.1	0.013	0.4	1.4	0	0	0
ENSG00000163728	TTC14	tetratricopeptide repeat domain 14	None	None	RNA binding|	10	-1.6	17.1	10	0	0	-1.6	13.7	0.0134	-3	-0.4	0	0	0
ENSG00000171509	RXFP1	relaxin/insulin-like family peptide receptor 1	plasma membrane|integral component of membrane|	adenylate cyclase-modulating G-protein coupled receptor signaling pathway|parturition|cell differentiation|extracellular matrix organization|lung connective tissue development|nipple morphogenesis|	G-protein coupled receptor activity|protein binding|hormone binding|metal ion binding|	10	-0.8	4.15	10	-1.7	12.4	-1.7	13.7	0.0134	-2.9	-0.7	0	0	0
ENSG00000106278	PTPRZ1	protein tyrosine phosphatase, receptor-type, Z polypeptide 1	proteinaceous extracellular matrix|integral component of plasma membrane|perineuronal net|	protein dephosphorylation|axonogenesis|central nervous system development|learning or memory|peptidyl-tyrosine dephosphorylation|oligodendrocyte differentiation|regulation of oligodendrocyte progenitor proliferation|	protein tyrosine phosphatase activity|transmembrane receptor protein tyrosine phosphatase activity|protein binding|	10	-0.9	5.9	10	-1.2	8.49	-1.1	13.4	0.0138	-1.8	-0.6	0	0	0
ENSG00000204427	ABHD16A	abhydrolase domain containing 16A	integral component of membrane|	metabolic process|	hydrolase activity|	9	-1.6	16.6	9	0.2	0.493	-1.6	13.4	0.0138	-3	-0.3	0	0	0
ENSG00000258083	OR9A4	olfactory receptor, family 9, subfamily A, member 4	plasma membrane|integral component of membrane|	G-protein coupled receptor signaling pathway|detection of chemical stimulus involved in sensory perception of smell|	G-protein coupled receptor activity|olfactory receptor activity|	10	-1.3	7.88	10	-0.9	6.6	-1	13.2	0.014	-1.9	-0.6	0	0	0
ENSG00000091317	CMTM6	CKLF-like MARVEL transmembrane domain containing 6	extracellular space|membrane|integral component of membrane|extracellular vesicular exosome|	chemotaxis|	cytokine activity|	10	-1.6	13.9	10	0.4	1.89	-1.5	13	0.0142	-3	-0.5	0	0	0
ENSG00000181693	OR8H1	olfactory receptor, family 8, subfamily H, member 1	plasma membrane|integral component of membrane|	G-protein coupled receptor signaling pathway|detection of chemical stimulus involved in sensory perception of smell|	G-protein coupled receptor activity|olfactory receptor activity|	10	-1.6	16.2	10	0.7	7.69	-1.6	12.9	0.0144	-3	-0.2	0	0	0
ENSG00000166930	MS4A5	membrane-spanning 4-domains, subfamily A, member 5	integral component of membrane|	None	None	10	1.9	9.12	10	1.3	5.02	1.8	12.9	0.0144	1.3	3	0	0	0
ENSG00000077147	TM9SF3	transmembrane 9 superfamily member 3	integral component of membrane|	None	None	10	-1.6	16.4	10	0.3	3.88	-1.6	12.8	0.0146	-3	-0.5	0	0	0
ENSG00000180433	OR6K6	olfactory receptor, family 6, subfamily K, member 6	plasma membrane|integral component of membrane|	G-protein coupled receptor signaling pathway|detection of chemical stimulus involved in sensory perception of smell|	G-protein coupled receptor activity|olfactory receptor activity|	10	-0.2	1.54	10	-0.7	14.3	-0.7	12.7	0.0148	-1.2	-0.2	0	0	0
ENSG00000135960	EDAR	ectodysplasin A receptor	plasma membrane|integral component of membrane|apical part of cell|	hair follicle development|apoptotic process|signal transduction|epidermis development|cell differentiation|positive regulation of NF-kappaB import into nucleus|odontogenesis of dentin-containing tooth|pigmentation|salivary gland cavitation|	receptor activity|transmembrane signaling receptor activity|protein binding|	10	1.3	15.5	10	0.1	0.321	1.3	12.6	0.015	0.3	2	0	0	0
ENSG00000198965	OR10R2	olfactory receptor, family 10, subfamily R, member 2	plasma membrane|integral component of membrane|	G-protein coupled receptor signaling pathway|detection of chemical stimulus involved in sensory perception of smell|	G-protein coupled receptor activity|olfactory receptor activity|	10	-2	15	10	0.5	2.45	-2	12.6	0.015	-4	-0.7	0	0	0
ENSG00000163331	DAPL1	death associated protein-like 1	None	apoptotic process|cell differentiation|	None	10	0.7	2.79	10	-0.8	12.2	-0.8	12.5	0.0151	-1.4	-0.3	0	0	0
ENSG00000155254	MARVELD1	MARVEL domain containing 1	nucleus|cytoplasm|cytoskeleton|plasma membrane|integral component of membrane|	cell cycle|	None	10	-1.6	15.8	10	0	0	-1.6	12.5	0.0151	-3	-0.5	0	0	0
ENSG00000174948	GPR149	G protein-coupled receptor 149	plasma membrane|integral component of membrane|	preantral ovarian follicle growth|antral ovarian follicle growth|G-protein coupled receptor signaling pathway|estrous cycle phase|negative regulation of ovulation|	G-protein coupled receptor activity|	10	0.9	14.4	10	0.2	0.536	0.8	12.3	0.0155	0.2	1.4	0	0	0
ENSG00000119820	YIPF4	Yip1 domain family, member 4	endoplasmic reticulum|Golgi apparatus|plasma membrane|integral component of membrane|intracellular membrane-bounded organelle|	None	None	10	-0.5	3.72	10	-1.7	13	-1.7	12.3	0.0155	-3	-0.5	0	0	0
ENSG00000121775	TMEM39B	transmembrane protein 39B	integral component of membrane|	None	None	10	-0.6	13.6	10	-0.2	0.653	-0.5	12.2	0.0156	-1	-0.2	0	0	0
ENSG00000185821	OR6C76	olfactory receptor, family 6, subfamily C, member 76	plasma membrane|integral component of membrane|	G-protein coupled receptor signaling pathway|detection of chemical stimulus involved in sensory perception of smell|	G-protein coupled receptor activity|olfactory receptor activity|	10	1.9	15.6	10	-0.7	4.08	1.9	12	0.016	1.2	3	0	0	0
ENSG00000169762	TAPT1	transmembrane anterior posterior transformation 1	integral component of membrane|	in utero embryonic development|G-protein coupled receptor signaling pathway|post-embryonic development|embryonic skeletal system development|	growth hormone-releasing hormone receptor activity|	10	-0.8	6.5	10	-1.1	6.4	-0.9	11.8	0.0164	-1.7	-0.5	0	0	0
ENSG00000167680	SEMA6B	sema domain, transmembrane domain (TM), and cytoplasmic domain, (semaphorin) 6B	plasma membrane|integral component of membrane|	nervous system development|cell differentiation|	receptor activity|semaphorin receptor binding|	10	-0.6	13.7	10	0.1	0.101	-0.6	11.5	0.0169	-1.2	-0.3	0	0	0
ENSG00000136709	WDR33	WD repeat domain 33	collagen trimer|nucleus|	postreplication repair|mRNA processing|spermatogenesis|	poly(A) RNA binding|	10	-1.7	14.5	10	0.7	1.55	-1.7	11.4	0.0171	-2.8	-0.6	0	0	0
ENSG00000150337	FCGR1A	Fc fragment of IgG, high affinity Ia, receptor (CD64)	plasma membrane|plasma membrane|integral component of membrane|clathrin-coated endocytic vesicle membrane|early endosome membrane|	antigen processing and presentation of peptide antigen via MHC class I|antigen processing and presentation of exogenous peptide antigen via MHC class I, TAP-dependent|phagocytosis, engulfment|immune response|signal transduction|cytokine-mediated signaling pathway|intracellular signal transduction|Fc-gamma receptor signaling pathway involved in phagocytosis|antigen processing and presentation of e…	receptor signaling protein activity|protein binding|IgG binding|	10	1.3	14.4	10	-0.6	4.45	1.3	11.4	0.0171	0.3	2	0	0	0
ENSG00000175591	P2RY2	purinergic receptor P2Y, G-protein coupled, 2	plasma membrane|integral component of plasma membrane|	cellular ion homeostasis|phospholipase C-activating G-protein coupled receptor signaling pathway|G-protein coupled purinergic nucleotide receptor signaling pathway|regulation of vasodilation|positive regulation of mucus secretion|	receptor activity|G-protein coupled purinergic nucleotide receptor activity|	10	-1.7	5.65	10	-1.4	6.96	-1.6	11.4	0.0171	-3	-1.2	0	0	0
ENSG00000179921	GPBAR1	G protein-coupled bile acid receptor 1	cytoplasm|plasma membrane|plasma membrane|integral component of membrane|	G-protein coupled receptor signaling pathway|cell surface bile acid receptor signaling pathway|	bile acid receptor activity|G-protein coupled bile acid receptor activity|	10	1.3	14.8	10	-0.4	1.75	1.3	11.3	0.0173	0.3	2	0	0	0
ENSG00000145242	EPHA5	EPH receptor A5	rough endoplasmic reticulum|plasma membrane|integral component of plasma membrane|external side of plasma membrane|axon|dendrite|neuronal cell body|perinuclear region of cytoplasm|	axon guidance|peptidyl-tyrosine phosphorylation|cAMP-mediated signaling|hippocampus development|regulation of Rac GTPase activity|positive regulation of CREB transcription factor activity|regulation of actin cytoskeleton organization|ephrin receptor signaling pathway|neuron development|negative regulation of synapse assembly|regulation of insulin secretion involved in cellular response to glucose…	ephrin receptor activity|GPI-linked ephrin receptor activity|transmembrane-ephrin receptor activity|ATP binding|	10	-1.1	2.83	10	-1.1	8.55	-1.1	11	0.0179	-1.8	-0.6	0	0	0
ENSG00000183643	C15ORF32	chromosome 15 open reading frame 32	None	None	None	10	-0.6	4	10	-0.9	7.57	-0.7	11	0.0179	-1.4	-0.3	0	0	0
ENSG00000141194	OR4D1	olfactory receptor, family 4, subfamily D, member 1	plasma membrane|integral component of membrane|	G-protein coupled receptor signaling pathway|sensory perception of smell|detection of chemical stimulus involved in sensory perception of smell|detection of chemical stimulus involved in sensory perception of smell|	G-protein coupled receptor activity|olfactory receptor activity|	10	-0.2	0.63	10	1.4	13.7	1.4	10.9	0.0182	0.6	2.8	0	0	0
ENSG00000255408	PCDHA3	protocadherin alpha 3	integral component of plasma membrane|	cell adhesion|homophilic cell adhesion|nervous system development|	calcium ion binding|	9	0	0	9	-1.5	13.1	-1.4	10.8	0.0184	-2.9	-1.1	0	0	0
ENSG00000121577	POPDC2	popeye domain containing 2	integral component of membrane|	biological_process|	molecular_function|	10	-1.5	5.96	10	-0.9	7.17	-1.2	10.7	0.0187	-2	-0.6	0	0	0
ENSG00000186501	TMEM222	transmembrane protein 222	integral component of membrane|	None	None	10	-0.3	2.76	10	1	14.1	1	10.7	0.0187	0.4	1.8	0	0	0
ENSG00000162236	STX5	syntaxin 5	Golgi membrane|nucleus|endoplasmic reticulum|Golgi apparatus|integral component of membrane|SNARE complex|endoplasmic reticulum-Golgi intermediate compartment membrane|	intracellular protein transport|ER to Golgi vesicle-mediated transport|vesicle targeting|retrograde transport, endosome to Golgi|vesicle fusion with Golgi apparatus|	SNAP receptor activity|protein binding|protein N-terminus binding|	10	-0.6	2.65	10	1	9.89	1	10.5	0.0192	0.3	1.8	0	0	0
ENSG00000130733	YIPF2	Yip1 domain family, member 2	integral component of membrane|transport vesicle|	None	None	10	0.7	2.19	10	1.2	10	1.1	10.4	0.0194	0.5	2	0	0	0
ENSG00000117362	APH1A	APH1A gamma secretase subunit	endoplasmic reticulum|endoplasmic reticulum membrane|Golgi apparatus|plasma membrane|integral component of plasma membrane|membrane|Golgi cisterna membrane|	metanephros development|membrane protein ectodomain proteolysis|Notch signaling pathway|Notch receptor processing|Notch receptor processing|protein processing|membrane protein intracellular domain proteolysis|membrane protein intracellular domain proteolysis|amyloid precursor protein catabolic process|amyloid precursor protein catabolic process|positive regulation of apoptotic process|positive re…	endopeptidase activity|protein binding|	10	-0.8	11.9	10	-0.2	0.699	-0.7	10.4	0.0194	-1.5	-0.3	0	0	0
ENSG00000273331	TM4SF19	transmembrane 4 L six family member 19	integral component of membrane|	None	None	2	-0.6	5.93	2	-1	5.26	-0.9	10.1	0.0202	-2	-0.5	0	0	0
ENSG00000162959	MEMO1	mediator of cell motility 1	nucleus|cytosol|	regulation of microtubule-based process|	protein binding|	9	-0.9	2.59	10	-1.1	8.22	-1	10.1	0.0202	-1.9	-0.6	0	0	0
ENSG00000133105	RXFP2	relaxin/insulin-like family peptide receptor 2	plasma membrane|integral component of membrane|	oocyte maturation|adenylate cyclase-activating G-protein coupled receptor signaling pathway|adenylate cyclase-inhibiting G-protein coupled receptor signaling pathway|negative regulation of cell proliferation|male gonad development|positive regulation of cAMP biosynthetic process|negative regulation of apoptotic process|	protein-hormone receptor activity|peptide hormone binding|	10	-0.6	5.25	10	-0.9	5.32	-0.5	10	0.0204	-1.4	-0.3	0	0	0
ENSG00000179542	SLITRK4	SLIT and NTRK-like family, member 4	integral component of membrane|	axonogenesis|	None	10	-0.9	11.7	10	0.7	0.879	-0.8	9.96	0.0205	-1.6	-0.3	0	0	0
ENSG00000155249	OR4K1	olfactory receptor, family 4, subfamily K, member 1	plasma membrane|integral component of membrane|	G-protein coupled receptor signaling pathway|detection of chemical stimulus involved in sensory perception of smell|	G-protein coupled receptor activity|olfactory receptor activity|	10	1.2	6	10	0.5	7.41	0.6	9.95	0.0206	0.2	1.7	0	0	0
ENSG00000174837	EMR1	egf-like module containing, mucin-like, hormone receptor-like 1	integral component of plasma membrane|external side of plasma membrane|	cell adhesion|G-protein coupled receptor signaling pathway|neuropeptide signaling pathway|	G-protein coupled receptor activity|calcium ion binding|	10	-0.6	9.72	10	-0.3	1.73	-0.5	9.88	0.0208	-1.2	-0.2	0	0	0
ENSG00000137054	POLR1E	polymerase (RNA) I polypeptide E, 53kDa	nucleolus|DNA-directed RNA polymerase I complex|	transcription from RNA polymerase I promoter|rRNA transcription|	RNA polymerase I activity|DNA binding|	10	-1	1.57	10	1.7	12.6	1.6	9.75	0.0212	0.4	2.8	0	0	0
ENSG00000135749	PCNXL2	pecanex-like 2 (Drosophila)	integral component of membrane|	None	None	10	1.5	13.2	10	-0.1	0.548	1.5	9.66	0.0215	0.9	3	0	0	0
ENSG00000170923	OR7G2	olfactory receptor, family 7, subfamily G, member 2	plasma membrane|integral component of membrane|	G-protein coupled receptor signaling pathway|detection of chemical stimulus involved in sensory perception of smell|	G-protein coupled receptor activity|olfactory receptor activity|	10	-1	12.8	10	0.3	1.76	-1	9.56	0.0218	-1.8	-0.5	0	0	0
ENSG00000169860	P2RY1	purinergic receptor P2Y, G-protein coupled, 1	plasma membrane|plasma membrane|integral component of plasma membrane|basolateral plasma membrane|apical plasma membrane|dendrite|cell body|postsynaptic membrane|neuronal postsynaptic density|	positive regulation of protein phosphorylation|adenosine receptor signaling pathway|cell surface receptor signaling pathway|G-protein coupled receptor signaling pathway|adenylate cyclase-inhibiting G-protein coupled receptor signaling pathway|phospholipase C-activating G-protein coupled receptor signaling pathway|positive regulation of cytosolic calcium ion concentration|brain development|aging|b…	receptor activity|protein binding|ATP binding|A1 adenosine receptor binding|ADP binding|G-protein coupled purinergic nucleotide receptor activity|ATP-activated nucleotide receptor activity|ADP-activated nucleotide receptor activity|protein heterodimerization activity|scaffold protein binding|	10	-0.3	0.352	10	-0.4	9.69	-0.4	9.52	0.022	-0.9	-0.1	0	0	0
ENSG00000171587	DSCAM	Down syndrome cell adhesion molecule	extracellular region|plasma membrane|plasma membrane|integral component of plasma membrane|membrane|axon|growth cone|	cell adhesion|negative regulation of cell adhesion|nervous system development|locomotory behavior|positive regulation of phosphorylation|dendrite morphogenesis|positive regulation of axon extension involved in axon guidance|post-embryonic retina morphogenesis in camera-type eye|dendrite self-avoidance|	protein binding|	10	0.4	2.03	10	1.1	11	1.1	9.51	0.022	0.2	1.8	0	0	0
ENSG00000172489	OR5T3	olfactory receptor, family 5, subfamily T, member 3	plasma membrane|integral component of membrane|	G-protein coupled receptor signaling pathway|detection of chemical stimulus involved in sensory perception of smell|	G-protein coupled receptor activity|olfactory receptor activity|	10	-0.7	7.24	10	-0.3	2.97	-0.7	9.45	0.0222	-1.4	-0.2	0	0	0
ENSG00000069493	CLEC2D	C-type lectin domain family 2, member D	endoplasmic reticulum|integral component of plasma membrane|cell surface|membrane|	cell surface receptor signaling pathway|	transmembrane signaling receptor activity|carbohydrate binding|	10	-0.1	0.629	10	-1.3	12.4	-1.3	9.39	0.0223	-2	0.2	0	0	0
ENSG00000168811	IL12A	interleukin 12A	extracellular space|cytoplasm|interleukin-12 complex|interleukin-12 complex|	positive regulation of T cell mediated cytotoxicity|positive regulation of natural killer cell mediated cytotoxicity directed against tumor cell target|immune response|cell cycle arrest|response to virus|response to UV-B|cell migration|response to lipopolysaccharide|negative regulation of interleukin-17 production|positive regulation of interferon-gamma production|positive regulation of natural k…	cytokine activity|cytokine activity|interleukin-12 receptor binding|protein binding|growth factor activity|growth factor activity|interleukin-12 beta subunit binding|interleukin-27 binding|protein heterodimerization activity|	10	-1.5	8.75	10	-1	1.99	-1.5	9.37	0.0225	-3	-0.8	0	0	0
ENSG00000176230	OR4K17	olfactory receptor, family 4, subfamily K, member 17	plasma membrane|integral component of membrane|	G-protein coupled receptor signaling pathway|detection of chemical stimulus involved in sensory perception of smell|	G-protein coupled receptor activity|olfactory receptor activity|	10	0.7	1.19	10	0.6	8.54	0.7	9.35	0.0225	0.2	1.3	0	0	0
ENSG00000169903	TM4SF4	transmembrane 4 L six family member 4	integral component of membrane|	tissue regeneration|	None	9	0.4	2.61	9	0.4	7.06	0.4	9.33	0.0226	0.2	0.9	0	0	0
ENSG00000168890	TMEM150A	transmembrane protein 150A	plasma membrane|integral component of membrane|	catabolic process|	None	10	0.4	6.13	10	0.5	3.79	0.4	9.32	0.0226	0.1	1.1	0	0	0
ENSG00000177697	CD151	CD151 molecule (Raph blood group)	cytosol|plasma membrane|integral component of plasma membrane|membrane|	cell adhesion|cell migration|extracellular matrix organization|hemidesmosome assembly|cell junction assembly|T cell proliferation|	protein binding|	10	-0.1	0.00613	10	1.1	12.4	1.1	9.16	0.0231	0.3	2	0	0	0
ENSG00000164180	TMEM161B	transmembrane protein 161B	integral component of membrane|	None	None	10	-0.8	11.7	10	-0.1	0.217	-0.7	9.14	0.0232	-1.5	-0.3	0	0	0
ENSG00000134825	TMEM258	transmembrane protein 258	integral component of membrane|	None	None	9	-0.7	7.99	9	-1.2	2.97	-1	9.08	0.0234	-1.9	-0.4	0	0	0
ENSG00000125734	GPR108	G protein-coupled receptor 108	integral component of membrane|	None	None	10	-0.7	7.36	10	-0.9	2.32	-0.8	9.06	0.0234	-1.6	-0.3	0	0	0
ENSG00000183150	GPR19	G protein-coupled receptor 19	integral component of plasma membrane|	G-protein coupled receptor signaling pathway|	G-protein coupled receptor activity|	10	-0.3	2.11	10	-0.8	9.1	-0.5	9.04	0.0235	-1.2	-0.1	0	0	0
ENSG00000171481	OR1L3	olfactory receptor, family 1, subfamily L, member 3	plasma membrane|integral component of membrane|	G-protein coupled receptor signaling pathway|detection of chemical stimulus involved in sensory perception of smell|	G-protein coupled receptor activity|olfactory receptor activity|	10	-0.2	0.336	10	1.5	12.5	1.5	9.03	0.0236	0.8	3	0	0	0
ENSG00000198952	SMG5	SMG5 nonsense mediated mRNA decay factor	nucleus|cytoplasm|cytosol|	nuclear-transcribed mRNA catabolic process, nonsense-mediated decay|mRNA export from nucleus|gene expression|RNA metabolic process|mRNA metabolic process|regulation of dephosphorylation|	protein binding|protein phosphatase 2A binding|	10	-1.1	8.03	10	0.2	1.34	-1	8.93	0.024	-1.9	-0.4	0	0	0
ENSG00000180772	AGTR2	angiotensin II receptor, type 2	extracellular region|plasma membrane|integral component of plasma membrane|perinuclear region of cytoplasm|	blood vessel remodeling|regulation of systemic arterial blood pressure by circulatory renin-angiotensin|renin-angiotensin regulation of aldosterone production|vasodilation by angiotensin involved in regulation of systemic arterial blood pressure|brain renin-angiotensin system|cellular sodium ion homeostasis|inflammatory response|cell surface receptor signaling pathway|G-protein coupled receptor s…	angiotensin type II receptor activity|protein binding|transcription factor binding|peptide hormone binding|receptor antagonist activity|	10	-0.3	2.7	10	1.1	10.5	1.1	8.83	0.0244	-0.4	2	0	0	0
ENSG00000111300	NAA25	N(alpha)-acetyltransferase 25, NatB auxiliary subunit	cytoplasm|	None	None	10	-0.7	6.31	10	-0.4	3.42	-0.6	8.83	0.0244	-1.7	0.5	0	0	0
ENSG00000183034	OTOP2	otopetrin 2	integral component of membrane|	None	None	10	0.5	1.01	10	1	8.8	0.6	8.75	0.0248	0.2	1.6	0	0	0
ENSG00000138073	PREB	prolactin regulatory element binding	Golgi membrane|nucleus|endoplasmic reticulum membrane|membrane|integral component of membrane|	transcription, DNA-templated|regulation of transcription, DNA-templated|ER to Golgi vesicle-mediated transport|activation of signaling protein activity involved in unfolded protein response|protein transport|protein N-linked glycosylation via asparagine|endoplasmic reticulum unfolded protein response|post-translational protein modification|cellular protein metabolic process|COPII vesicle coating|…	DNA binding|	10	-0.6	5.88	10	1	6.78	-0.9	8.73	0.0248	-2	1.3	0	0	0
ENSG00000165271	NOL6	nucleolar protein 6 (RNA-associated)	condensed nuclear chromosome|nucleus|nucleolus|nucleolus|mitochondrion|	rRNA processing|	RNA binding|poly(A) RNA binding|	10	-0.9	10	10	-0.2	2.13	-0.7	8.7	0.025	-1.5	-0.2	0	0	0
ENSG00000157181	C1ORF27	chromosome 1 open reading frame 27	integral component of membrane|	oxidation-reduction process|	zinc ion binding|oxidoreductase activity|	9	-0.7	11.3	10	1	4.16	-0.6	8.61	0.0254	-2	0.5	0	0	0
ENSG00000169327	OR5AU1	olfactory receptor, family 5, subfamily AU, member 1	plasma membrane|integral component of membrane|	G-protein coupled receptor signaling pathway|detection of chemical stimulus involved in sensory perception of smell|	G-protein coupled receptor activity|olfactory receptor activity|	10	1.1	11.5	9	-0.3	3.7	1	8.59	0.0255	0.3	2	0	0	0
ENSG00000130538	OR11H1	olfactory receptor, family 11, subfamily H, member 1	plasma membrane|integral component of membrane|	G-protein coupled receptor signaling pathway|detection of chemical stimulus involved in sensory perception of smell|	G-protein coupled receptor activity|olfactory receptor activity|	4	-0.8	3.59	4	-0.6	5.58	-0.7	8.53	0.0259	-1.7	-0.2	0	0	0
ENSG00000113068	PFDN1	prefoldin subunit 1	prefoldin complex|	regulation of transcription, DNA-templated|protein folding|cell cycle|telencephalon development|cerebellum development|actin cytoskeleton organization|B cell activation|cellular protein metabolic process|'de novo' posttranslational protein folding|	sequence-specific DNA binding transcription factor activity|unfolded protein binding|	10	-0.8	10.2	10	-0.3	1	-0.7	8.48	0.0261	-1.5	-0.2	0	0	0
ENSG00000164841	TMEM74	transmembrane protein 74	autophagic vacuole membrane|lysosomal membrane|integral component of membrane|cytoplasmic vesicle|	autophagy|	None	10	-0.3	1	10	1.1	8.99	1.1	8.44	0.0264	0.3	2	0	0	0
ENSG00000168955	TM4SF20	transmembrane 4 L six family member 20	plasma membrane|integral component of membrane|	None	None	10	1.3	10.1	10	0.2	0.469	1.2	8.43	0.0264	0.3	2	0	0	0
ENSG00000186092	OR4F5	olfactory receptor, family 4, subfamily F, member 5	plasma membrane|integral component of membrane|	G-protein coupled receptor signaling pathway|detection of chemical stimulus involved in sensory perception of smell|	G-protein coupled receptor activity|olfactory receptor activity|	8	0.8	1.81	8	-1.1	9.55	-0.8	8.42	0.0264	-1.9	-0.4	0	0	0
ENSG00000186480	INSIG1	insulin induced gene 1	endoplasmic reticulum|endoplasmic reticulum membrane|SREBP-SCAP-Insig complex|	triglyceride metabolic process|cholesterol biosynthetic process|metabolic process|cell proliferation|negative regulation of steroid biosynthetic process|SREBP signaling pathway|inner ear morphogenesis|middle ear morphogenesis|small molecule metabolic process|negative regulation of fat cell differentiation|negative regulation of fatty acid biosynthetic process|palate development|cranial suture mor…	protein binding|	10	0.4	7.52	10	0.2	1.79	0.4	8.38	0.0268	0.1	1.2	0	0	0
ENSG00000269035	CTD-2521M24.10	N/A	None	None	None	10	-0.6	0.785	10	-0.8	7.92	-0.8	8.31	0.0272	-1.6	-0.3	0	0	0
ENSG00000178015	GPR150	G protein-coupled receptor 150	plasma membrane|integral component of membrane|	G-protein coupled receptor signaling pathway|	G-protein coupled receptor activity|	10	0.3	0.993	10	0.7	9.54	0.7	8.2	0.0279	0.2	1.6	0	0	0
ENSG00000147570	DNAJC5B	DnaJ (Hsp40) homolog, subfamily C, member 5 beta	membrane|	None	None	10	-0.8	0.771	10	1.1	11.4	1.1	8.19	0.0279	0.3	2	0	0	0
ENSG00000172663	TMEM134	transmembrane protein 134	integral component of membrane|	None	None	10	-0.5	9.02	9	0	0	-0.5	8.16	0.0281	-1.1	-0.1	0	0	0
ENSG00000142227	EMP3	epithelial membrane protein 3	integral component of membrane|	negative regulation of cell proliferation|cell growth|	None	10	-0.5	2.7	10	-0.7	6.69	-0.6	8.09	0.0285	-1.3	-0.1	0	0	0
ENSG00000136404	TM6SF1	transmembrane 6 superfamily member 1	integral component of membrane|	biological_process|	molecular_function|	10	-0.8	10.9	10	0	0	-0.7	8.08	0.0285	-1.6	-0.2	0	0	0
ENSG00000164051	CCDC51	coiled-coil domain containing 51	nucleus|mitochondrion|integral component of membrane|	None	None	10	-0.6	8.1	10	-0.2	0.662	-0.6	8.06	0.0287	-1.4	-0.2	0	0	0
ENSG00000204979	MS4A13	membrane-spanning 4-domains, subfamily A, member 13	integral component of membrane|	None	None	6	-0.9	10.2	6	-0.1	0.177	-0.9	7.97	0.0292	-2	-0.4	0	0	0
ENSG00000181963	OR52K2	olfactory receptor, family 52, subfamily K, member 2	plasma membrane|integral component of membrane|	G-protein coupled receptor signaling pathway|detection of chemical stimulus involved in sensory perception of smell|	G-protein coupled receptor activity|olfactory receptor activity|	10	-0.5	7.96	10	-0.2	1.21	-0.4	7.95	0.0292	-1	-0.1	0	0	0
ENSG00000170683	OR10A3	olfactory receptor, family 10, subfamily A, member 3	plasma membrane|integral component of membrane|	G-protein coupled receptor signaling pathway|sensory perception of smell|detection of chemical stimulus involved in sensory perception of smell|detection of chemical stimulus involved in sensory perception of smell|	G-protein coupled receptor activity|olfactory receptor activity|	10	-0.4	0.91	10	-1.3	8.65	-0.6	7.9	0.0296	-1.8	-0.2	0	0	0
ENSG00000125629	INSIG2	insulin induced gene 2	endoplasmic reticulum membrane|SREBP-SCAP-Insig complex|	triglyceride metabolic process|cholesterol biosynthetic process|negative regulation of steroid biosynthetic process|response to insulin|SREBP signaling pathway|inner ear morphogenesis|middle ear morphogenesis|small molecule metabolic process|negative regulation of fatty acid biosynthetic process|palate development|cranial suture morphogenesis|response to fatty acid|	protein binding|transcription factor binding|	10	0.9	11.1	10	0	0	0.9	7.89	0.0297	0.4	1.9	0	0	0
ENSG00000127515	OR7A10	olfactory receptor, family 7, subfamily A, member 10	plasma membrane|integral component of membrane|	G-protein coupled receptor signaling pathway|detection of chemical stimulus involved in sensory perception of smell|	G-protein coupled receptor activity|olfactory receptor activity|	10	-0.7	5.78	10	-0.7	2.36	-0.7	7.82	0.0301	-1.5	-0.1	0	0	0
ENSG00000182544	MFSD5	major facilitator superfamily domain containing 5	plasma membrane|membrane|integral component of membrane|	ion transport|	None	10	0.6	3.71	10	0.6	4.36	0.6	7.72	0.0308	0.1	1.4	0	0	0
ENSG00000169836	TACR3	tachykinin receptor 3	nucleus|cytoplasm|plasma membrane|integral component of plasma membrane|dendrite membrane|neuronal cell body membrane|	tachykinin receptor signaling pathway|aging|positive regulation of heart rate|response to estradiol|regulation of dopamine metabolic process|response to cocaine|hyperosmotic salinity response|response to morphine|positive regulation of blood pressure|regulation of feeding behavior|positive regulation of uterine smooth muscle contraction|	tachykinin receptor activity|protein binding|	10	0.3	4.1	10	0.8	4.27	0.3	7.72	0.0308	0.1	1.2	0	0	0
ENSG00000019169	MARCO	macrophage receptor with collagenous structure	collagen trimer|plasma membrane|integral component of plasma membrane|endocytic vesicle membrane|	pattern recognition receptor signaling pathway|receptor-mediated endocytosis|cell surface receptor signaling pathway|apoptotic cell clearance|innate immune response|	transmembrane signaling receptor activity|scavenger receptor activity|signaling pattern recognition receptor activity|	10	-0.2	0.667	10	1.9	11.3	1.9	7.71	0.0309	1	3	0	0	0
ENSG00000181847	TIGIT	T cell immunoreceptor with Ig and ITIM domains	plasma membrane|cell surface|integral component of membrane|	negative regulation of interleukin-12 production|positive regulation of interleukin-10 production|negative regulation of T cell activation|negative regulation of T cell activation|	receptor binding|protein binding|	10	-0.4	4.29	10	1.1	4.89	0.9	7.7	0.031	-0.5	2	0	0	0
ENSG00000146066	HIGD2A	HIG1 hypoxia inducible domain family, member 2A	mitochondrial inner membrane|integral component of membrane|respiratory chain|	negative regulation of apoptotic process|oxidation-reduction process|	None	10	-0.3	2.97	10	-0.5	5.11	-0.4	7.64	0.0313	-1.2	-0.1	0	0	0
ENSG00000257019	OR13C2	olfactory receptor, family 13, subfamily C, member 2	plasma membrane|integral component of membrane|	G-protein coupled receptor signaling pathway|detection of chemical stimulus involved in sensory perception of smell|	G-protein coupled receptor activity|olfactory receptor activity|	10	-1.7	10.7	10	0	0	-1.7	7.63	0.0314	-3	-0.6	0	0	0
ENSG00000129255	MPDU1	mannose-P-dolichol utilization defect 1	mitochondrion|endoplasmic reticulum|endoplasmic reticulum membrane|membrane|integral component of membrane|extracellular vesicular exosome|	protein folding|dolichol-linked oligosaccharide biosynthetic process|transport|oligosaccharide biosynthetic process|oligosaccharide biosynthetic process|	None	10	-0.9	1.63	10	-1	6.35	-1	7.63	0.0314	-1.9	-0.4	0	0	0
ENSG00000007923	DNAJC11	DnaJ (Hsp40) homolog, subfamily C, member 11	mitochondrial inner membrane|extracellular vesicular exosome|	None	protein binding|	10	-0.7	5.37	10	-0.4	3.05	-0.6	7.63	0.0314	-1.2	-0.1	0	0	0
ENSG00000139304	PTPRQ	protein tyrosine phosphatase, receptor type, Q	integral component of membrane|	peptidyl-tyrosine dephosphorylation|inner ear morphogenesis|regulation of fat cell differentiation|	protein tyrosine phosphatase activity|	10	1	9.69	10	-0.1	0.2	0.5	7.57	0.0318	0.2	1.7	0	0	0
ENSG00000178358	OR2D3	olfactory receptor, family 2, subfamily D, member 3	plasma membrane|integral component of membrane|	G-protein coupled receptor signaling pathway|detection of chemical stimulus involved in sensory perception of smell|	G-protein coupled receptor activity|olfactory receptor activity|	10	-0.3	0.862	10	-1.2	9.4	-0.7	7.54	0.0321	-1.8	-0.2	0	0	0
ENSG00000160791	CCR5	chemokine (C-C motif) receptor 5 (gene/pseudogene)	cytoplasm|endosome|plasma membrane|integral component of plasma membrane|external side of plasma membrane|cell surface|	MAPK cascade|dendritic cell chemotaxis|calcium ion transport|chemotaxis|inflammatory response|immune response|cellular defense response|cell surface receptor signaling pathway|G-protein coupled receptor signaling pathway|positive regulation of cytosolic calcium ion concentration|cell-cell signaling|release of sequestered calcium ion into cytosol by sarcoplasmic reticulum|viral process|calcium-med…	actin binding|phosphatidylinositol phospholipase C activity|chemokine receptor activity|protein binding|coreceptor activity|C-C chemokine receptor activity|C-C chemokine receptor activity|C-C chemokine binding|chemokine (C-C motif) ligand 5 binding|	10	-0.9	6.71	10	1.9	11.2	1.9	7.51	0.0324	-0.9	3	0	0	0
ENSG00000167825	OR5I1	olfactory receptor, family 5, subfamily I, member 1	plasma membrane|integral component of membrane|	signal transduction|G-protein coupled receptor signaling pathway|detection of chemical stimulus involved in sensory perception of smell|	G-protein coupled receptor activity|olfactory receptor activity|	10	-1.5	9.3	10	0.2	1.42	-1.5	7.51	0.0324	-3	-0.3	0	0	0
ENSG00000145107	TM4SF19	transmembrane 4 L six family member 19	integral component of membrane|	None	None	10	-0.8	4.98	10	-0.4	3.56	-0.7	7.48	0.0325	-1.4	-0.1	0	0	0
ENSG00000071537	SEL1L	sel-1 suppressor of lin-12-like (C. elegans)	endoplasmic reticulum membrane|integral component of membrane|	Notch signaling pathway|response to endoplasmic reticulum stress|	protein binding|	10	0.5	4.52	10	0.7	3.48	0.6	7.45	0.0327	0.1	1.4	0	0	0
ENSG00000183185	GABRR3	gamma-aminobutyric acid (GABA) A receptor, rho 3	cellular_component|plasma membrane|cell junction|chloride channel complex|postsynaptic membrane|	gamma-aminobutyric acid signaling pathway|synaptic transmission|synaptic transmission|ion transmembrane transport|transmembrane transport|chloride transmembrane transport|	GABA-A receptor activity|extracellular ligand-gated ion channel activity|chloride channel activity|	10	0	0	10	-0.5	8.37	-0.5	7.43	0.033	-1.2	-0.1	0	0	0
ENSG00000183484	GPR132	G protein-coupled receptor 132	plasma membrane|integral component of membrane|	G1/S transition of mitotic cell cycle|response to stress|G-protein coupled receptor signaling pathway|	G-protein coupled receptor activity|	10	1.3	10.3	10	0.2	0.738	1.2	7.42	0.0331	0.2	2	0	0	0
ENSG00000231738	TSPAN19	tetraspanin 19	integral component of membrane|	None	None	10	-0.6	5.13	10	-1.3	4.99	-0.7	7.41	0.0331	-1.9	-0.2	0	0	0
ENSG00000119777	TMEM214	transmembrane protein 214	endoplasmic reticulum membrane|cytoplasmic microtubule|integral component of membrane|	apoptotic process|	None	10	0.5	1.23	10	0.9	6.88	0.6	7.28	0.0342	0.1	1.6	0	0	0
ENSG00000188394	GPR21	G protein-coupled receptor 21	integral component of plasma membrane|	G-protein coupled receptor signaling pathway|positive regulation of multicellular organism growth|glucose homeostasis|negative regulation of insulin receptor signaling pathway|	G-protein coupled receptor activity|	10	0.3	3.32	10	0.7	4.69	0.7	7.25	0.0345	-0.5	1.8	0	0	0
ENSG00000204564	C6ORF136	chromosome 6 open reading frame 136	mitochondrion|	None	None	10	-0.5	7.12	10	-0.2	1.36	-0.4	7.24	0.0346	-1	-0.1	0	0	0
ENSG00000121807	CCR2	chemokine (C-C motif) receptor 2	cytoplasm|cytosol|plasma membrane|plasma membrane|integral component of plasma membrane|integral component of membrane|dendrite|neuronal cell body|perikaryon|perinuclear region of cytoplasm|	blood vessel remodeling|dendritic cell chemotaxis|positive regulation of T-helper 1 type immune response|negative regulation of type 2 immune response|cellular calcium ion homeostasis|chemotaxis|inflammatory response|immune response|cellular defense response|G-protein coupled receptor signaling pathway|negative regulation of adenylate cyclase activity|positive regulation of cytosolic calcium ion …	chemokine receptor activity|C-C chemokine receptor activity|CCR2 chemokine receptor binding|protein homodimerization activity|	10	-1.2	4.99	10	-0.9	2.93	-1	7.22	0.0348	-1.9	-0.3	0	0	0
ENSG00000134115	CNTN6	contactin 6	plasma membrane|anchored component of membrane|	cell adhesion|Notch signaling pathway|axon guidance|central nervous system development|	None	10	-0.1	0.371	10	1.1	10.5	1.1	7.18	0.0351	0.2	2	0	0	0
ENSG00000139679	LPAR6	lysophosphatidic acid receptor 6	plasma membrane|plasma membrane|integral component of membrane|	G-protein coupled receptor signaling pathway|	G-protein coupled receptor activity|	10	-0.4	5.33	10	-1	3.03	-0.4	7.15	0.0354	-1.3	-0.1	0	0	0
ENSG00000184650	ODF4	outer dense fiber of sperm tails 4	outer dense fiber|integral component of membrane|motile cilium|	multicellular organismal development|spermatogenesis|cell differentiation|	None	10	-0.3	2.74	10	-0.4	5.49	-0.4	7.15	0.0354	-1	-0.1	0	0	0
ENSG00000108506	INTS2	integrator complex subunit 2	intracellular|membrane|integral component of membrane|nuclear membrane|integrator complex|	snRNA processing|	protein binding|	10	0.4	0.576	10	-0.8	9.77	-0.8	7.12	0.0357	-1.7	-0.2	0	0	0
ENSG00000204439	C6ORF47	chromosome 6 open reading frame 47	cytoplasm|	None	None	10	-0.2	0.478	10	1.2	10.5	1.2	7.09	0.0359	0.2	2	0	0	0
ENSG00000185475	TMEM179B	transmembrane protein 179B	integral component of membrane|	None	None	10	1.2	9.26	10	-0.8	1.15	1.1	7.08	0.036	0.1	2	0	0	0
ENSG00000139211	AMIGO2	adhesion molecule with Ig-like domain 2	nucleus|plasma membrane|integral component of membrane|	homophilic cell adhesion|heterophilic cell-cell adhesion|negative regulation of apoptotic process|negative regulation of programmed cell death|	protein binding|	10	-0.5	4.07	10	-0.4	3.34	-0.5	7.04	0.0364	-1.4	-0.1	0	0	0
ENSG00000243749	ZMYM6NB	ZMYM6 neighbor	integral component of membrane|	None	None	10	-0.3	1.71	10	1.1	10.4	1.1	7.02	0.0365	0.2	2	0	0	0
ENSG00000205497	OR51A4	olfactory receptor, family 51, subfamily A, member 4	plasma membrane|integral component of membrane|	G-protein coupled receptor signaling pathway|detection of chemical stimulus involved in sensory perception of smell|	G-protein coupled receptor activity|olfactory receptor activity|	10	0	0	10	1.1	10.3	1.1	6.98	0.0369	0.2	1.9	0	0	0
ENSG00000204300	TMEM225	transmembrane protein 225	integral component of membrane|	negative regulation of phosphatase activity|	None	10	-0.4	4.4	10	-0.5	2.9	-0.4	6.94	0.0372	-0.8	-0.1	0	0	0
ENSG00000253873	PCDHGA11	protocadherin gamma subfamily A, 11	plasma membrane|integral component of membrane|	homophilic cell adhesion|	calcium ion binding|	5	1.2	9.17	5	0.1	0.0635	1.1	6.92	0.0374	0.3	2	0	0	0
ENSG00000170558	CDH2	cadherin 2, type 1, N-cadherin (neuronal)	plasma membrane|cell-cell junction|cell-cell adherens junction|fascia adherens|intercalated disc|integral component of membrane|apical plasma membrane|catenin complex|lamellipodium|synapse|extracellular vesicular exosome|	cell adhesion|homophilic cell adhesion|heterophilic cell-cell adhesion|calcium-dependent cell-cell adhesion|cell migration|cell junction assembly|adherens junction organization|muscle cell differentiation|positive regulation of MAPK cascade|cell-cell junction organization|blood vessel morphogenesis|striated muscle cell differentiation|positive regulation of muscle cell differentiation|negative re…	calcium ion binding|protein binding|beta-catenin binding|protein phosphatase binding|alpha-catenin binding|gamma-catenin binding|	10	0.2	2.39	10	0.4	5.27	0.3	6.9	0.0376	0	0.8	0	0	0
ENSG00000179820	MYADM	myeloid-associated differentiation marker	ruffle|plasma membrane|plasma membrane|cell-cell junction|integral component of membrane|cortical actin cytoskeleton|membrane raft|extracellular vesicular exosome|	negative regulation of protein phosphorylation|negative regulation of gene expression|positive regulation of cell migration|negative regulation of actin filament polymerization|membrane raft organization|negative regulation of heterotypic cell-cell adhesion|establishment of endothelial barrier|protein targeting to plasma membrane|negative regulation of protein kinase C signaling|positive regulati…	molecular_function|	10	-1.4	6.99	10	-0.2	0.94	-0.3	6.9	0.0376	-1.9	-0.1	0	0	0
ENSG00000187037	GPR141	G protein-coupled receptor 141	plasma membrane|integral component of membrane|	G-protein coupled receptor signaling pathway|	G-protein coupled receptor activity|	10	-1.5	10.1	10	-0.1	0.216	-1.5	6.89	0.0377	-3	-0.2	0	0	0
ENSG00000188393	CLEC2A	C-type lectin domain family 2, member A	plasma membrane|integral component of membrane|	natural killer cell mediated cytotoxicity|	protein binding|carbohydrate binding|protein homodimerization activity|	10	1.6	10.4	10	-0.2	0.351	1.5	6.88	0.0378	0.8	3	0	0	0
ENSG00000146453	PNLDC1	poly(A)-specific ribonuclease (PARN)-like domain containing 1	nucleus|integral component of membrane|	None	nucleic acid binding|	10	-1	0.872	10	0.9	9.35	0.9	6.88	0.0378	0.2	1.9	0	0	0
ENSG00000187806	TMEM202	transmembrane protein 202	integral component of membrane|	None	None	9	-0.8	7.34	9	0.7	9.26	0.6	6.78	0.0388	-1.3	1.8	0	0	0
ENSG00000178084	HTR3C	5-hydroxytryptamine (serotonin) receptor 3C, ionotropic	plasma membrane|integral component of membrane|	ion transmembrane transport|transmembrane transport|	extracellular ligand-gated ion channel activity|	10	-0.3	2.07	10	-0.5	5.76	-0.4	6.77	0.0389	-1	-0.1	0	0	0
ENSG00000089063	TMEM230	transmembrane protein 230	integral component of membrane|	None	None	10	-1.1	7.94	10	1.5	8.89	1.4	6.75	0.0391	-1.5	3	0	0	0
ENSG00000164953	TMEM67	transmembrane protein 67	endoplasmic reticulum membrane|centrosome|integral component of membrane|cytoplasmic vesicle membrane|TCTN-B9D complex|ciliary membrane|	negative regulation of centrosome duplication|ER-associated ubiquitin-dependent protein catabolic process|cilium assembly|cilium morphogenesis|	protein binding|filamin binding|unfolded protein binding|	10	-0.6	4.85	10	0.7	8.11	0.6	6.71	0.0394	-0.8	1.7	0	0	0
ENSG00000188069	OR51F1	olfactory receptor, family 51, subfamily F, member 1	plasma membrane|integral component of membrane|	G-protein coupled receptor signaling pathway|detection of chemical stimulus involved in sensory perception of smell|	G-protein coupled receptor activity|olfactory receptor activity|	10	-0.5	4.76	10	-0.3	2.77	-0.4	6.7	0.0395	-1	0	0	0	0
ENSG00000153551	CMTM7	CKLF-like MARVEL transmembrane domain containing 7	extracellular space|membrane|integral component of membrane|	chemotaxis|	cytokine activity|	10	1.1	9.09	10	0.2	0.646	1	6.67	0.0398	0.2	1.9	0	0	0
ENSG00000104894	CD37	CD37 molecule	immunological synapse|membrane|integral component of membrane|extracellular vesicular exosome|	positive regulation of immunoglobulin production|regulation of humoral immune response|negative regulation of cell proliferation|negative regulation of myeloid dendritic cell activation|defense response to protozoan|regulation of defense response to virus|	protein binding|	10	-0.5	6.04	10	-0.3	2.04	-0.4	6.66	0.0399	-1.2	0	0	0	0
ENSG00000198250	ANTXRL	anthrax toxin receptor-like	integral component of membrane|	None	receptor activity|metal ion binding|	10	-0.7	8.52	10	0	0	-0.7	6.64	0.0402	-1.7	-0.2	0	0	0
ENSG00000204520	MICA	MHC class I polypeptide-related sequence A	extracellular space|cytoplasm|integral component of plasma membrane|cell surface|	T cell mediated cytotoxicity|immune response to tumor cell|cellular response to DNA damage stimulus|response to heat|viral process|cytolysis|antigen processing and presentation|natural killer cell mediated cytotoxicity|defense response to bacterium|gamma-delta T cell activation|defense response to virus|	protein binding|natural killer cell lectin-like receptor binding|natural killer cell lectin-like receptor binding|	10	0.4	7.98	10	0.1	0.0373	0.4	6.63	0.0403	0.1	1.2	0	0	0
ENSG00000064115	TM7SF3	transmembrane 7 superfamily member 3	plasma membrane|integral component of membrane|extracellular vesicular exosome|	biological_process|	molecular_function|	10	1.2	4.13	10	-0.4	4.76	-0.4	6.63	0.0403	-1.2	1.8	0	0	0
ENSG00000196208	GREB1	growth regulation by estrogen in breast cancer 1	integral component of membrane|	None	None	10	-0.1	0.169	10	1.2	9.82	1.1	6.61	0.0405	0.3	2	0	0	0
ENSG00000171596	NMUR1	neuromedin U receptor 1	plasma membrane|integral component of plasma membrane|integral component of membrane|	calcium ion transport|chloride transport|smooth muscle contraction|G-protein coupled receptor signaling pathway|phospholipase C-activating G-protein coupled receptor signaling pathway|activation of phospholipase C activity|neuropeptide signaling pathway|calcium-mediated signaling|inositol phosphate-mediated signaling|	neuromedin U receptor activity|G-protein coupled receptor activity|neuropeptide receptor activity|	10	-0.5	1.23	10	1.2	9.7	1.2	6.6	0.0406	0.2	2	0	0	0
ENSG00000242180	OR51B5	olfactory receptor, family 51, subfamily B, member 5	plasma membrane|integral component of membrane|	G-protein coupled receptor signaling pathway|sensory perception of smell|detection of chemical stimulus involved in sensory perception of smell|detection of chemical stimulus involved in sensory perception of smell|	G-protein coupled receptor activity|olfactory receptor activity|	10	-0.2	0.759	10	1.1	9.76	1	6.6	0.0406	-0.4	2	0	0	0
ENSG00000044524	EPHA3	EPH receptor A3	extracellular region|early endosome|integral component of plasma membrane|	cell adhesion|regulation of epithelial to mesenchymal transition|positive regulation of neuron projection development|cell migration|peptidyl-tyrosine phosphorylation|regulation of Rho GTPase activity|regulation of actin cytoskeleton organization|ephrin receptor signaling pathway|regulation of focal adhesion assembly|regulation of microtubule cytoskeleton organization|cellular response to retinoi…	GPI-linked ephrin receptor activity|protein binding|ATP binding|	10	-0.9	9.22	10	0.3	1.38	-0.9	6.57	0.041	-2	-0.1	0	0	0
ENSG00000172738	TMEM217	transmembrane protein 217	integral component of membrane|	None	None	10	0.6	7.03	10	0.3	0.704	0.5	6.54	0.0413	0	1.3	0	0	0
ENSG00000143434	SEMA6C	sema domain, transmembrane domain (TM), and cytoplasmic domain, (semaphorin) 6C	plasma membrane|integral component of membrane|	axon guidance|	receptor activity|semaphorin receptor binding|	10	-0.6	6.48	10	-0.8	0.665	-0.6	6.54	0.0413	-1.4	-0.1	0	0	0
ENSG00000159346	ADIPOR1	adiponectin receptor 1	plasma membrane|membrane|integral component of membrane|	hormone-mediated signaling pathway|fatty acid oxidation|negative regulation of cell growth|leptin-mediated signaling pathway|adiponectin-activated signaling pathway|positive regulation of JAK-STAT cascade|positive regulation of insulin receptor signaling pathway|	receptor activity|protein kinase binding|hormone binding|identical protein binding|protein heterodimerization activity|	10	-0.2	0.462	10	1.2	9.1	1.2	6.52	0.0415	-0.3	2	0	0	0
ENSG00000102401	ARMCX3	armadillo repeat containing, X-linked 3	integral component of mitochondrial outer membrane|	cellular protein localization|positive regulation of transcription from RNA polymerase II promoter|	None	10	0.5	4.13	10	0.4	2.72	0.4	6.51	0.0417	0	1.1	0	0	0
ENSG00000006831	ADIPOR2	adiponectin receptor 2	plasma membrane|integral component of membrane|	heart development|female pregnancy|response to nutrient|hormone-mediated signaling pathway|fatty acid oxidation|negative regulation of cell growth|adiponectin-activated signaling pathway|positive regulation of glucose import|	receptor activity|hormone binding|hormone binding|identical protein binding|protein heterodimerization activity|	10	-0.5	2.49	10	-0.9	4.43	-0.6	6.47	0.0422	-1.6	0.4	0	0	0
ENSG00000243364	EFNA4	ephrin-A4	extracellular region|plasma membrane|integral component of plasma membrane|anchored component of membrane|	cell-cell signaling|axon guidance|osteoclast differentiation|bone remodeling|ephrin receptor signaling pathway|	transmembrane-ephrin receptor activity|protein binding|ephrin receptor binding|	8	0.4	0.529	8	1.1	8.16	1.1	6.4	0.043	0.2	2	0	0	0
ENSG00000151117	TMEM86A	transmembrane protein 86A	integral component of membrane|	None	None	10	-1.2	1.55	10	0.9	9.56	0.9	6.33	0.044	-0.1	2	0	0	0
ENSG00000254788	CKLF-CMTM1	CKLF-CMTM1 readthrough	None	None	None	3	-1	4.93	3	-0.6	2.63	-0.9	6.3	0.0443	-2	-0.2	0	0	0
ENSG00000155659	VSIG4	V-set and immunoglobulin domain containing 4	integral component of membrane|extracellular vesicular exosome|	complement activation, alternative pathway|negative regulation of interleukin-2 production|negative regulation of T cell proliferation|	protein binding|	10	0	0	10	1.2	9.7	1.2	6.29	0.0445	0.3	2	0	0	0
ENSG00000205693	MANSC4	MANSC domain containing 4	integral component of membrane|	None	None	10	-0.7	2.88	10	-0.4	3.85	-0.4	6.28	0.0446	-1.4	0.2	0	0	0
ENSG00000183389	OR56A4	olfactory receptor, family 56, subfamily A, member 4	plasma membrane|integral component of membrane|	G-protein coupled receptor signaling pathway|detection of chemical stimulus involved in sensory perception of smell|	G-protein coupled receptor activity|olfactory receptor activity|	10	0.9	1.34	10	0.7	5.44	0.7	6.27	0.0448	0	1.8	0	0	0
ENSG00000087301	TXNDC16	thioredoxin domain containing 16	endoplasmic reticulum lumen|extracellular vesicular exosome|	biological_process|cell redox homeostasis|	protein binding|	10	1.6	9.61	10	0.1	0.195	1.5	6.26	0.0449	0.7	3	0	0	0
ENSG00000134757	DSG3	desmoglein 3	cytosol|plasma membrane|integral component of membrane|desmosome|extracellular vesicular exosome|	apoptotic process|cellular component disassembly involved in execution phase of apoptosis|homophilic cell adhesion|	calcium ion binding|	10	1.1	2.39	10	1.3	4.39	1.2	6.21	0.0454	0.6	2	0	0	0
ENSG00000205496	OR51A2	olfactory receptor, family 51, subfamily A, member 2	plasma membrane|integral component of membrane|	G-protein coupled receptor signaling pathway|detection of chemical stimulus involved in sensory perception of smell|	G-protein coupled receptor activity|olfactory receptor activity|	10	0.1	0.24	10	1.1	8.2	1.1	6.2	0.0456	0.2	2	0	0	0
ENSG00000187066	TMEM262	transmembrane protein 262	integral component of membrane|	None	None	10	-0.8	5.53	10	-0.4	0.881	-0.7	6.14	0.0464	-1.8	0.1	0	0	0
ENSG00000133678	TMEM254	transmembrane protein 254	integral component of membrane|	None	None	10	-0.5	4.3	10	-0.5	2.13	-0.5	6.13	0.0466	-1.2	0.1	0	0	0
ENSG00000124383	MPHOSPH10	M-phase phosphoprotein 10 (U3 small nucleolar ribonucleoprotein)	chromosome|nucleolus|small nucleolar ribonucleoprotein complex|	RNA splicing, via transesterification reactions|rRNA processing|RNA processing|RNA splicing|negative regulation of phosphatase activity|	protein binding|poly(A) RNA binding|	10	-0.4	5.59	10	-0.2	1.01	-0.4	6.11	0.0468	-1.1	0.2	0	0	0
ENSG00000170348	TMED10	transmembrane emp24-like trafficking protein 10 (yeast)	Golgi membrane|Golgi membrane|endoplasmic reticulum|endoplasmic reticulum membrane|endoplasmic reticulum-Golgi intermediate compartment|Golgi apparatus|cis-Golgi network|plasma membrane|integral component of membrane|COPI-coated vesicle|trans-Golgi network transport vesicle|transport vesicle membrane|secretory granule membrane|endoplasmic reticulum-Golgi intermediate compartment membrane|melanoso…	response to acid|kidney development|intracellular protein transport|ER to Golgi vesicle-mediated transport|retrograde vesicle-mediated transport, Golgi to ER|Golgi organization|beta-amyloid formation|cargo loading into vesicle|COPI-coated vesicle budding|response to alkaloid|regulated secretory pathway|vesicle targeting, to, from or within Golgi|COPI coating of Golgi vesicle|COPII vesicle coating…	protein binding|syntaxin binding|protein complex binding|	10	0.5	0.577	10	0.9	6.63	0.8	6.09	0.0472	-1.3	2	0	0	0
ENSG00000011638	TMEM159	transmembrane protein 159	integral component of membrane|	None	None	10	0.1	0.0906	10	1.2	9.27	1.2	6.09	0.0472	0.4	2	0	0	0
ENSG00000118308	LRMP	lymphoid-restricted membrane protein	spindle pole|nuclear envelope|chromosome|endoplasmic reticulum membrane|microtubule organizing center|integral component of plasma membrane|membrane|integral component of membrane|integral component of endoplasmic reticulum membrane|	immune system process|vesicle targeting|vesicle fusion|single fertilization|	None	10	0.9	6.74	10	-0.2	0.547	0.9	6.04	0.0479	0.1	2	0	0	0
ENSG00000186297	GABRA5	gamma-aminobutyric acid (GABA) A receptor, alpha 5	plasma membrane|integral component of plasma membrane|cell junction|dendrite|neuronal cell body membrane|chloride channel complex|receptor complex|postsynaptic membrane|	behavioral fear response|transport|signal transduction|gamma-aminobutyric acid signaling pathway|synaptic transmission|brain development|sensory perception of sound|associative learning|ion transmembrane transport|negative regulation of neuron apoptotic process|transmembrane transport|inner ear receptor cell development|innervation|cochlea development|chloride transmembrane transport|	receptor activity|GABA-A receptor activity|transporter activity|extracellular ligand-gated ion channel activity|chloride channel activity|GABA receptor binding|	10	-0.9	3.87	9	-0.4	2.68	-0.4	6.02	0.0482	-1.5	0.1	0	0	0
ENSG00000257138	TAS2R38	taste receptor, type 2, member 38	plasma membrane|integral component of membrane|	detection of chemical stimulus involved in sensory perception of bitter taste|G-protein coupled receptor signaling pathway|	bitter taste receptor activity|	10	-0.9	6.13	10	1.4	8.5	1.3	6.02	0.0482	-1.1	2	0	0	0
ENSG00000172742	OR4D9	olfactory receptor, family 4, subfamily D, member 9	plasma membrane|integral component of membrane|	G-protein coupled receptor signaling pathway|detection of chemical stimulus involved in sensory perception of smell|	G-protein coupled receptor activity|olfactory receptor activity|	10	0	0	10	-0.6	6.52	-0.6	5.97	0.0491	-1.5	-0.1	0	0	0
ENSG00000178927	C17ORF62	chromosome 17 open reading frame 62	integral component of membrane|	None	protein binding|	10	-0.3	0.725	10	0.4	7.44	0.4	5.9	0.0503	-0.3	1.2	0	0	0
ENSG00000255804	OR6J1	olfactory receptor, family 6, subfamily J, member 1 (gene/pseudogene)	plasma membrane|integral component of membrane|	G-protein coupled receptor signaling pathway|detection of chemical stimulus involved in sensory perception of smell|	G-protein coupled receptor activity|olfactory receptor activity|	10	0.7	5.17	10	0.6	0.998	0.7	5.89	0.0505	0	1.6	0	0	0
ENSG00000185920	PTCH1	patched 1	Golgi apparatus|plasma membrane|caveola|postsynaptic density|integral component of membrane|midbody|intracellular membrane-bounded organelle|dendritic growth cone|axonal growth cone|perinuclear region of cytoplasm|primary cilium|	negative regulation of transcription from RNA polymerase II promoter|branching involved in ureteric bud morphogenesis|neural tube closure|heart morphogenesis|smoothened signaling pathway|smoothened signaling pathway|regulation of mitotic cell cycle|brain development|epidermis development|regulation of smoothened signaling pathway|response to mechanical stimulus|organ morphogenesis|dorsal/ventral …	patched binding|smoothened binding|protein binding|hedgehog receptor activity|heparin binding|cholesterol binding|cyclin binding|protein complex binding|hedgehog family protein binding|	10	-0.3	3.77	10	-0.4	2.55	-0.4	5.88	0.0507	-1	0.1	0	0	0
ENSG00000181803	OR6S1	olfactory receptor, family 6, subfamily S, member 1	plasma membrane|integral component of membrane|	G-protein coupled receptor signaling pathway|detection of chemical stimulus involved in sensory perception of smell|	G-protein coupled receptor activity|olfactory receptor activity|	10	0	0	10	0.4	7.53	0.3	5.85	0.0512	-0.1	1	0	0	0
ENSG00000253304	TMEM200B	transmembrane protein 200B	integral component of membrane|	None	None	10	-0.3	3.38	10	-0.4	3.05	-0.4	5.84	0.0513	-0.9	0	0	0	0
ENSG00000231192	OR5H1	olfactory receptor, family 5, subfamily H, member 1	plasma membrane|integral component of membrane|	G-protein coupled receptor signaling pathway|detection of chemical stimulus involved in sensory perception of smell|	G-protein coupled receptor activity|olfactory receptor activity|	9	0.7	0.399	9	0.6	5.71	0.6	5.8	0.052	-0.3	1.7	0	0	0
ENSG00000211456	SACM1L	SAC1 suppressor of actin mutations 1-like (yeast)	Golgi membrane|endoplasmic reticulum membrane|endoplasmic reticulum membrane|Golgi apparatus|integral component of endoplasmic reticulum membrane|alpha-amino-3-hydroxy-5-methyl-4-isoxazolepropionic acid selective glutamate receptor complex|	phospholipid metabolic process|phosphatidylinositol biosynthetic process|biological_process|small molecule metabolic process|phosphatidylinositol dephosphorylation|	phosphatidylinositol-3-phosphatase activity|protein binding|phosphatase activity|phosphatidylinositol bisphosphate phosphatase activity|phosphatidylinositol-4-phosphate phosphatase activity|	10	-0.4	4.54	10	-0.8	1.75	-0.4	5.8	0.052	-1.6	0	0	0	0
ENSG00000233932	CTXN2	cortexin 2	integral component of membrane|	None	None	9	0.1	0.162	9	-0.7	8.67	-0.7	5.79	0.0521	-1.7	-0.1	0	0	0
ENSG00000238227	C9ORF69	chromosome 9 open reading frame 69	nucleus|cytoplasm|integral component of membrane|	cell cycle|positive regulation of cell proliferation|viral process|positive regulation of viral process|	protein binding|GTP binding|	10	-1.3	1.08	10	-1.4	5.06	-1.4	5.78	0.0523	-2	-0.1	0	0	0
ENSG00000170180	GYPA	glycophorin A (MNS blood group)	plasma membrane|integral component of plasma membrane|external side of plasma membrane|membrane|extracellular vesicular exosome|	cytoskeletal anchoring at plasma membrane|response to virus|viral process|regulation of response to osmotic stress|	virus receptor activity|identical protein binding|protein homodimerization activity|	8	0.9	3.71	8	-1.2	8.58	-1.1	5.74	0.0529	-2	1.1	0	0	0
ENSG00000249242	TMEM150C	transmembrane protein 150C	integral component of membrane|	None	None	10	0.4	0.707	10	-1.7	8.34	-1.7	5.72	0.0532	-3	-0.1	0	0	0
ENSG00000008300	CELSR3	cadherin, EGF LAG seven-pass G-type receptor 3	plasma membrane|integral component of membrane|	neuron migration|homophilic cell adhesion|G-protein coupled receptor signaling pathway|neuropeptide signaling pathway|axonal fasciculation|regulation of protein localization|cilium assembly|	G-protein coupled receptor activity|calcium ion binding|protein binding|	10	-0.6	7.81	10	-0.1	0.326	-0.5	5.72	0.0532	-1.4	-0.1	0	0	0
ENSG00000164604	GPR85	G protein-coupled receptor 85	plasma membrane|integral component of membrane|	signal transduction|G-protein coupled receptor signaling pathway|	G-protein coupled receptor activity|	10	0.6	5.37	10	-0.4	1.42	0.5	5.7	0.0534	-0.8	1.4	0	0	0
ENSG00000156313	RPGR	retinitis pigmentosa GTPase regulator	photoreceptor outer segment|Golgi apparatus|centrosome|ciliary basal body|sperm flagellum|	intracellular protein transport|visual perception|intraciliary transport|cilium assembly|eye photoreceptor cell development|positive regulation of GTPase activity|response to stimulus|	guanyl-nucleotide exchange factor activity|protein binding|poly(A) RNA binding|	10	-0.5	4.39	10	-0.4	1.84	-0.5	5.7	0.0534	-1.2	0	0	0	0
ENSG00000184155	OR10J5	olfactory receptor, family 10, subfamily J, member 5	plasma membrane|integral component of membrane|	G-protein coupled receptor signaling pathway|detection of chemical stimulus involved in sensory perception of smell|	G-protein coupled receptor activity|olfactory receptor activity|	10	0	0	10	-0.8	8.17	-0.8	5.7	0.0534	-1.8	-0.1	0	0	0
ENSG00000152207	CYSLTR2	cysteinyl leukotriene receptor 2	cellular_component|plasma membrane|integral component of membrane|	immune response|G-protein coupled receptor signaling pathway|positive regulation of cell death|positive regulation of angiogenesis|positive regulation of ERK1 and ERK2 cascade|	cysteinyl leukotriene receptor activity|leukotriene receptor activity|protein binding|	10	-0.8	3.15	10	-1.6	4.74	-1.5	5.66	0.0542	-2.9	-0.2	0	0	0
ENSG00000139200	PIANP	PILR alpha associated neural protein	integral component of membrane|	None	None	10	-0.7	8.56	10	0.1	0.197	-0.6	5.66	0.0542	-1.6	0	0	0	0
ENSG00000237521	OR7E24	olfactory receptor, family 7, subfamily E, member 24	plasma membrane|integral component of membrane|	G-protein coupled receptor signaling pathway|detection of chemical stimulus involved in sensory perception of smell|	G-protein coupled receptor activity|olfactory receptor activity|	10	-0.5	4.95	10	0.8	1.43	-0.4	5.65	0.0544	-1.3	0.8	0	0	0
ENSG00000164197	RNF180	ring finger protein 180	nuclear envelope|integral component of membrane|intrinsic component of endoplasmic reticulum membrane|	protein ubiquitination|positive regulation of proteasomal ubiquitin-dependent protein catabolic process|	ubiquitin-protein transferase activity|zinc ion binding|ligase activity|ubiquitin conjugating enzyme binding|	10	-0.5	5.58	10	-0.2	1.36	-0.4	5.63	0.0547	-1.2	0	0	0	0
ENSG00000204661	C5ORF60	chromosome 5 open reading frame 60	integral component of membrane|	None	None	9	-0.5	7.29	9	0.3	0.897	-0.4	5.62	0.0549	-1.6	0.3	0	0	0
ENSG00000182634	OR10G7	olfactory receptor, family 10, subfamily G, member 7	plasma membrane|integral component of membrane|	G-protein coupled receptor signaling pathway|detection of chemical stimulus involved in sensory perception of smell|	G-protein coupled receptor activity|olfactory receptor activity|	10	-0.4	4.85	10	-0.3	1.16	-0.4	5.61	0.0551	-1.1	0.2	0	0	0
ENSG00000140932	CMTM2	CKLF-like MARVEL transmembrane domain containing 2	extracellular space|nucleus|integral component of membrane|	chemotaxis|	cytokine activity|	10	-0.6	4.33	10	-0.7	1.62	-0.6	5.58	0.0556	-1.5	0	0	0	0
ENSG00000027697	IFNGR1	interferon gamma receptor 1	endoplasmic reticulum|plasma membrane|integral component of plasma membrane|postsynaptic density|dendrite|vesicle|	signal transduction|response to virus|cytokine-mediated signaling pathway|interferon-gamma-mediated signaling pathway|regulation of interferon-gamma-mediated signaling pathway|	interferon-gamma receptor activity|protein binding|cytokine binding|	10	-0.4	4.63	10	-1.2	3.68	-0.4	5.57	0.0558	-1.7	-0.1	0	0	0
ENSG00000147926	SPATA31A3	SPATA31 subfamily A, member 3	integral component of membrane|	spermatogenesis|cell differentiation|	None	10	0.4	4.22	10	-0.7	2.5	0.4	5.53	0.0562	-1.1	1	0	0	0
ENSG00000169344	UMOD	uromodulin	spindle pole|extracellular space|Golgi apparatus|basolateral plasma membrane|apical plasma membrane|extrinsic component of membrane|anchored component of membrane|cytoplasmic vesicle|membrane raft|ciliary membrane|extracellular vesicular exosome|primary cilium|	cellular defense response|heterophilic cell-cell adhesion|leukocyte cell-cell adhesion|excretion|negative regulation of cell proliferation|response to organic substance|chemical homeostasis|metanephric ascending thin limb development|metanephric distal convoluted tubule development|metanephric thick ascending limb development|neutrophil migration|regulation of ion homeostasis|	calcium ion binding|IgG binding|	10	0.3	4.46	10	0.3	1.27	0.3	5.47	0.0574	-0.1	1.5	0	0	0
ENSG00000269526	ERVV-1	endogenous retrovirus group V, member 1	integral component of membrane|	None	None	10	-0.6	5.35	10	-0.5	0.597	-0.6	5.45	0.0577	-1.5	0	0	0	0
ENSG00000143028	SYPL2	synaptophysin-like 2	integral component of synaptic vesicle membrane|	transport|cellular calcium ion homeostasis|substantia nigra development|	transporter activity|	10	1.2	8.05	10	0.3	0.804	1.2	5.41	0.0585	0.2	2	0	0	0
ENSG00000214787	MS4A4E	membrane-spanning 4-domains, subfamily A, member 4E	integral component of membrane|	None	None	10	0.8	0.763	10	1.3	5.9	1.3	5.41	0.0585	-1.3	2	0	0	0
ENSG00000171054	OR13H1	olfactory receptor, family 13, subfamily H, member 1	plasma membrane|integral component of membrane|	G-protein coupled receptor signaling pathway|detection of chemical stimulus involved in sensory perception of smell|	G-protein coupled receptor activity|olfactory receptor activity|	10	0.7	7.29	10	0.1	0.105	0.6	5.4	0.0587	-0.2	1.6	0	0	0
ENSG00000160856	FCRL3	Fc receptor-like 3	plasma membrane|integral component of membrane|	None	None	10	0.4	3.21	10	0.3	2.48	0.4	5.39	0.0589	-0.1	1.5	0	0	0
ENSG00000203727	SAMD5	sterile alpha motif domain containing 5	None	None	None	10	-1.5	4.11	10	-0.9	3.19	-1.3	5.37	0.0593	-2	-0.2	0	0	0
ENSG00000143543	JTB	jumping translocation breakpoint	cytoplasm|mitochondrion|centrosome|spindle|integral component of plasma membrane|membrane|midbody|	cytokinesis|mitotic nuclear division|apoptotic mitochondrial changes|regulation of cell proliferation|positive regulation of protein kinase activity|	protein kinase binding|	10	1.6	8.71	10	-0.4	1.84	1.6	5.35	0.0598	-0.3	3	0	0	0
ENSG00000152990	GPR125	G protein-coupled receptor 125	external side of plasma membrane|integral component of membrane|	G-protein coupled receptor signaling pathway|neuropeptide signaling pathway|	G-protein coupled receptor activity|	10	-0.3	1.39	10	0.7	7.63	0.7	5.32	0.0603	-1	1.7	0	0	0
ENSG00000236032	OR5H14	olfactory receptor, family 5, subfamily H, member 14	plasma membrane|integral component of membrane|	G-protein coupled receptor signaling pathway|detection of chemical stimulus involved in sensory perception of smell|	G-protein coupled receptor activity|olfactory receptor activity|	10	-0.9	3.06	10	-0.8	2.6	-0.9	5.31	0.0606	-1.9	-0.1	0	0	0
ENSG00000179002	TAS1R2	taste receptor, type 1, member 2	plasma membrane|integral component of membrane|receptor complex|	detection of chemical stimulus involved in sensory perception of sweet taste|G-protein coupled receptor signaling pathway|positive regulation of cytokinesis|sensory perception of sweet taste|	taste receptor activity|taste receptor activity|sweet taste receptor activity|protein heterodimerization activity|	10	-0.5	2.18	10	-0.6	3.38	-0.5	5.24	0.0617	-1.3	0.1	0	0	0
ENSG00000169760	NLGN1	neuroligin 1	integral component of plasma membrane|integral component of plasma membrane|external side of plasma membrane|cell surface|cell surface|N-methyl-D-aspartate selective glutamate receptor complex|cell junction|dendrite|filopodium tip|synapse|synapse|postsynaptic membrane|neuronal postsynaptic density|	regulation of respiratory gaseous exchange by neurological system process|protein targeting|heterophilic cell-cell adhesion|neuron cell-cell adhesion|neuron cell-cell adhesion|nervous system development|synapse assembly|synapse assembly|synaptic vesicle targeting|calcium-dependent cell-cell adhesion|neuronal signal transduction|positive regulation of synaptic transmission, GABAergic|protein local…	receptor activity|receptor activity|PDZ domain binding|neurexin family protein binding|neurexin family protein binding|protein dimerization activity|cell adhesion molecule binding|	10	-0.8	6.94	10	-0.2	1.41	-0.7	5.23	0.0619	-1.8	-0.1	0	0	0
ENSG00000181616	OR52H1	olfactory receptor, family 52, subfamily H, member 1	plasma membrane|integral component of membrane|	G-protein coupled receptor signaling pathway|detection of chemical stimulus involved in sensory perception of smell|	G-protein coupled receptor activity|olfactory receptor activity|	10	-0.8	2.76	10	-1	2.97	-0.9	5.22	0.0622	-1.9	-0.1	0	0	0
ENSG00000064201	TSPAN32	tetraspanin 32	intracellular|cell surface|integrin alphaIIb-beta3 complex|	cytoskeleton organization|integrin-mediated signaling pathway|cell-cell signaling|negative regulation of cell proliferation|negative regulation of myeloid dendritic cell activation|defense response to protozoan|regulation of defense response to virus|platelet aggregation|	molecular_function|	10	1.2	8.67	10	-0.2	1.84	1.2	5.21	0.0624	-0.2	2	0	0	0
ENSG00000005884	ITGA3	integrin, alpha 3 (antigen CD49C, alpha 3 subunit of VLA-3 receptor)	plasma membrane|plasma membrane|integrin complex|cell surface|basolateral plasma membrane|growth cone|integrin alpha3-beta1 complex|receptor complex|synapse|perinuclear region of cytoplasm|extracellular vesicular exosome|	neuron migration|cell-matrix adhesion|integrin-mediated signaling pathway|heart development|blood coagulation|memory|positive regulation of gene expression|positive regulation of epithelial cell migration|positive regulation of cell-substrate adhesion|positive regulation of neuron projection development|extracellular matrix organization|negative regulation of cell projection organization|response…	fibronectin binding|integrin binding|protein binding|collagen binding|protein domain specific binding|laminin binding|metal ion binding|protein heterodimerization activity|	10	0	0	10	-0.3	6.38	-0.3	5.21	0.0624	-0.9	0.1	0	0	0
ENSG00000212126	TAS2R50	taste receptor, type 2, member 50	plasma membrane|integral component of membrane|	detection of chemical stimulus involved in sensory perception of bitter taste|G-protein coupled receptor signaling pathway|	bitter taste receptor activity|	10	-0.8	7.06	10	1.2	7.08	-0.7	5.21	0.0624	-2	1.7	0	0	0
ENSG00000183269	OR52E8	olfactory receptor, family 52, subfamily E, member 8	plasma membrane|integral component of membrane|	G-protein coupled receptor signaling pathway|detection of chemical stimulus involved in sensory perception of smell|	G-protein coupled receptor activity|olfactory receptor activity|	10	0	0	10	1.2	8.22	1.2	5.2	0.0626	-0.1	2	0	0	0
ENSG00000188822	CNR2	cannabinoid receptor 2 (macrophage)	plasma membrane|integral component of plasma membrane|dendrite|extrinsic component of cytoplasmic side of plasma membrane|perikaryon|	response to amphetamine|inflammatory response|immune response|G-protein coupled receptor signaling pathway, coupled to cyclic nucleotide second messenger|sensory perception of pain|negative regulation of synaptic transmission, GABAergic|response to lipopolysaccharide|negative regulation of mast cell activation|cannabinoid signaling pathway|negative regulation of action potential|negative regulati…	cannabinoid receptor activity|	10	-0.9	8.24	10	0.1	0.105	-0.9	5.19	0.0628	-2	0.1	0	0	0
ENSG00000206503	HLA-A	major histocompatibility complex, class I, A	Golgi membrane|endoplasmic reticulum|endoplasmic reticulum|Golgi apparatus|Golgi apparatus|Golgi medial cisterna|plasma membrane|integral component of plasma membrane|cell surface|cell surface|ER to Golgi transport vesicle membrane|membrane|phagocytic vesicle membrane|early endosome membrane|MHC class I protein complex|MHC class I protein complex|extracellular vesicular exosome|endoplasmic reticu…	positive regulation of T cell mediated cytotoxicity|positive regulation of T cell mediated cytotoxicity|antigen processing and presentation of peptide antigen via MHC class I|antigen processing and presentation of exogenous peptide antigen via MHC class I, TAP-dependent|antigen processing and presentation of exogenous peptide antigen via MHC class I, TAP-independent|antigen processing and present…	receptor binding|protein binding|beta-2-microglobulin binding|beta-2-microglobulin binding|peptide antigen binding|peptide antigen binding|T cell receptor binding|poly(A) RNA binding|TAP binding|	10	-1.7	8.5	10	0	0	-1.7	5.13	0.0639	-3	-0.3	0	0	0
ENSG00000135914	HTR2B	5-hydroxytryptamine (serotonin) receptor 2B, G protein-coupled	cytoplasm|plasma membrane|plasma membrane|integral component of plasma membrane|cell junction|neuron projection|synapse|	neural crest cell migration|positive regulation of cytokine production|positive regulation of endothelial cell proliferation|G-protein coupled receptor internalization|heart morphogenesis|cardiac muscle hypertrophy|cGMP biosynthetic process|cellular calcium ion homeostasis|G-protein coupled receptor signaling pathway|activation of phospholipase C activity|protein kinase C-activating G-protein cou…	G-protein alpha-subunit binding|serotonin receptor activity|Ras GTPase activator activity|drug binding|serotonin binding|	10	0.4	4.67	10	0.5	0.677	0.4	5.11	0.0644	-1.1	1.3	0	0	0
ENSG00000214782	MS4A18	membrane-spanning 4-domains, subfamily A, member 18	integral component of membrane|	None	None	10	0.4	3.73	10	0.2	2.28	0.3	5.09	0.0649	-0.7	1	0	0	0
ENSG00000182612	TSPAN10	tetraspanin 10	integral component of membrane|	establishment of protein localization to organelle|	enzyme binding|	10	1.2	8.29	10	-1.1	3.16	1.2	5.08	0.065	-0.8	2	0	0	0
ENSG00000189067	LITAF	lipopolysaccharide-induced TNF factor	nucleus|cytoplasm|lysosomal membrane|Golgi apparatus|Golgi apparatus|plasma membrane|intracellular membrane-bounded organelle|	regulation of cytokine production|transcription, DNA-templated|regulation of transcription from RNA polymerase II promoter|apoptotic process|signal transduction|aging|negative regulation of NF-kappaB import into nucleus|positive regulation of I-kappaB kinase/NF-kappaB signaling|cellular response to lipopolysaccharide|	signal transducer activity|protein binding|WW domain binding|	10	-0.6	7.92	10	0.8	0.138	-0.5	5.05	0.0656	-1.8	0	0	0	0
ENSG00000162723	SLAMF9	SLAM family member 9	integral component of membrane|	None	receptor activity|	10	-1.4	8.28	10	1.1	7.48	-1.4	5.04	0.0659	-2	1.7	0	0	0
ENSG00000114698	PLSCR4	phospholipid scramblase 4	plasma membrane|integral component of membrane|extracellular vesicular exosome|	phospholipid scrambling|cellular response to lipopolysaccharide|	calcium ion binding|protein binding|SH3 domain binding|phospholipid scramblase activity|enzyme binding|CD4 receptor binding|	10	-0.3	2.42	10	-1.3	5.89	-0.4	5.03	0.0662	-1.9	-0.1	0	0	0
ENSG00000239732	TLR9	toll-like receptor 9	Golgi membrane|extracellular region|cytoplasm|lysosome|endosome|endoplasmic reticulum|endoplasmic reticulum membrane|plasma membrane|endosome membrane|integral component of membrane|basolateral plasma membrane|apical plasma membrane|early phagosome|endolysosome membrane|	toll-like receptor signaling pathway|response to molecule of bacterial origin|MyD88-dependent toll-like receptor signaling pathway|inflammatory response|I-kappaB phosphorylation|insulin receptor signaling pathway|maintenance of gastrointestinal epithelium|negative regulation of NF-kappaB transcription factor activity|negative regulation of interleukin-6 production|negative regulation of interleuk…	transmembrane signaling receptor activity|interleukin-1 receptor binding|siRNA binding|	6	-0.9	4.81	6	0.4	1.14	-0.7	5.03	0.0662	-2	0.1	0	0	0
ENSG00000139914	FITM1	fat storage-inducing transmembrane protein 1	endoplasmic reticulum membrane|integral component of endoplasmic reticulum membrane|	positive regulation of sequestering of triglyceride|lipid particle organization|	molecular_function|	10	-0.6	7.72	10	0.4	1.58	-0.6	5.03	0.0662	-1.6	0.4	0	0	0
ENSG00000127507	EMR2	egf-like module containing, mucin-like, hormone receptor-like 2	plasma membrane|integral component of membrane|leading edge membrane|ruffle membrane|	inflammatory response|cell adhesion|G-protein coupled receptor signaling pathway|neuropeptide signaling pathway|cell migration|granulocyte chemotaxis|	G-protein coupled receptor activity|calcium ion binding|chondroitin sulfate binding|	10	-0.5	5.41	10	0.1	0.11	-0.7	5	0.0668	-1.6	0	0	0	0
ENSG00000160654	CD3G	CD3g molecule, gamma (CD3-TCR complex)	plasma membrane|integral component of plasma membrane|T cell receptor complex|alpha-beta T cell receptor complex|	protein complex assembly|establishment or maintenance of cell polarity|cell surface receptor signaling pathway|protein transport|T cell costimulation|Fc-gamma receptor signaling pathway involved in phagocytosis|T cell activation|innate immune response|regulation of immune response|T cell receptor signaling pathway|regulation of lymphocyte apoptotic process|	transmembrane signaling receptor activity|receptor signaling complex scaffold activity|T cell receptor binding|protein heterodimerization activity|	10	-1	1.85	10	-1.2	3.95	-1.1	4.99	0.0671	-1.9	-0.1	0	0	0
ENSG00000156738	MS4A1	membrane-spanning 4-domains, subfamily A, member 1	extracellular space|integral component of plasma membrane|external side of plasma membrane|extracellular vesicular exosome|	humoral immune response|B cell proliferation|	epidermal growth factor receptor binding|MHC class II protein complex binding|	10	0.5	4.91	10	0.1	0.905	0.4	4.96	0.0678	-0.1	1.3	0	0	0
ENSG00000022355	GABRA1	gamma-aminobutyric acid (GABA) A receptor, alpha 1	plasma membrane|integral component of plasma membrane|cell junction|chloride channel complex|postsynaptic membrane|	transport|gamma-aminobutyric acid signaling pathway|synaptic transmission|ion transmembrane transport|synaptic transmission, GABAergic|transmembrane transport|chloride transmembrane transport|	GABA-A receptor activity|extracellular ligand-gated ion channel activity|chloride channel activity|drug binding|GABA receptor activity|	10	-0.5	5.79	10	-0.1	0.282	-0.4	4.95	0.0681	-1.1	0.2	0	0	0
ENSG00000124802	EEF1E1	eukaryotic translation elongation factor 1 epsilon 1	nucleus|cytoplasm|cytosol|extracellular vesicular exosome|	tRNA aminoacylation for protein translation|negative regulation of cell proliferation|gene expression|positive regulation of apoptotic process|positive regulation of DNA damage response, signal transduction by p53 class mediator|	protein binding|	3	-0.8	3.79	3	-0.6	1.84	-0.7	4.94	0.0683	-2	0	0	0	0
ENSG00000143119	CD53	CD53 molecule	immunological synapse|plasma membrane|cell-cell junction|cell surface|integral component of membrane|extracellular vesicular exosome|	signal transduction|positive regulation of myoblast fusion|	protein binding|	10	-0.6	5.16	10	-0.3	0.779	-0.4	4.93	0.0685	-1.4	0.1	0	0	0
ENSG00000121210	KIAA0922	KIAA0922	integral component of membrane|	None	None	10	0.2	1.66	10	0.4	4.05	0.2	4.9	0.069	-0.2	1.1	0	0	0
ENSG00000143801	PSEN2	presenilin 2	Golgi membrane|kinetochore|nuclear inner membrane|mitochondrial inner membrane|lysosomal membrane|endoplasmic reticulum|endoplasmic reticulum membrane|Golgi apparatus|centrosome|cytosol|plasma membrane|integral component of plasma membrane|cell cortex|cell surface|membrane|apical plasma membrane|Z disc|axon|growth cone|neuromuscular junction|ciliary rootlet|neuronal cell body|dendritic shaft|prot…	response to hypoxia|cell fate specification|somitogenesis|negative regulation of protein phosphorylation|hematopoietic progenitor cell differentiation|T cell activation involved in immune response|myeloid leukocyte differentiation|membrane protein ectodomain proteolysis|calcium ion transport|regulation of epidermal growth factor-activated receptor activity|Notch signaling pathway|Notch receptor p…	endopeptidase activity|aspartic-type endopeptidase activity|protein binding|	10	0.3	3.36	10	0.3	1.81	0.3	4.9	0.069	-0.8	1	0	0	0
ENSG00000139266	2020-03-09	membrane-associated ring finger (C3HC4) 9	Golgi membrane|lysosomal membrane|Golgi stack|trans-Golgi network|integral component of membrane|	protein ubiquitination|	zinc ion binding|ligase activity|	10	0.4	2.94	10	0.9	3.45	0.5	4.88	0.0696	0	1.7	0	0	0
ENSG00000171204	TMEM126B	transmembrane protein 126B	cellular_component|integral component of membrane|mitochondrial membrane|	biological_process|	molecular_function|	10	-0.5	7.28	10	0	0	-0.5	4.88	0.0696	-1.5	0.1	0	0	0
ENSG00000179213	SIGLECL1	SIGLEC family like 1	integral component of membrane|	None	None	10	1.1	2.55	10	-0.4	4.26	-0.4	4.86	0.0701	-2	1.1	0	0	0
ENSG00000170929	OR1M1	olfactory receptor, family 1, subfamily M, member 1	plasma membrane|integral component of membrane|	G-protein coupled receptor signaling pathway|detection of chemical stimulus involved in sensory perception of smell|	G-protein coupled receptor activity|olfactory receptor activity|	9	-0.5	2.83	9	-0.6	2.56	-0.6	4.85	0.0703	-1.5	0.3	0	0	0
ENSG00000171505	OR1N1	olfactory receptor, family 1, subfamily N, member 1	plasma membrane|integral component of membrane|	G-protein coupled receptor signaling pathway|detection of chemical stimulus involved in sensory perception of smell|	G-protein coupled receptor activity|olfactory receptor activity|	10	0.7	7.49	10	0	0	0.6	4.81	0.0714	0	1.6	0	0	0
ENSG00000181371	OR5M8	olfactory receptor, family 5, subfamily M, member 8	plasma membrane|integral component of membrane|	G-protein coupled receptor signaling pathway|detection of chemical stimulus involved in sensory perception of smell|	G-protein coupled receptor activity|olfactory receptor activity|	10	-0.5	5.5	10	-0.1	0.231	-0.5	4.78	0.0721	-1.3	0.1	0	0	0
ENSG00000177455	CD19	CD19 molecule	plasma membrane|integral component of plasma membrane|external side of plasma membrane|extracellular vesicular exosome|	cellular defense response|cell surface receptor signaling pathway|epidermal growth factor receptor signaling pathway|fibroblast growth factor receptor signaling pathway|Fc-epsilon receptor signaling pathway|innate immune response|neurotrophin TRK receptor signaling pathway|phosphatidylinositol-mediated signaling|regulation of immune response|B cell receptor signaling pathway|	receptor signaling protein activity|	10	0.5	1.97	10	-0.5	6.1	-0.5	4.77	0.0724	-1.7	0.8	0	0	0
ENSG00000132185	FCRLA	Fc receptor-like A	extracellular region|cytoplasm|	cell differentiation|	None	10	-0.4	6.59	10	0	0	-0.4	4.77	0.0724	-1.2	0.1	0	0	0
ENSG00000176742	OR51V1	olfactory receptor, family 51, subfamily V, member 1	plasma membrane|integral component of membrane|	G-protein coupled receptor signaling pathway|sensory perception of smell|detection of chemical stimulus involved in sensory perception of smell|detection of chemical stimulus involved in sensory perception of smell|	G-protein coupled receptor activity|olfactory receptor activity|	10	-0.4	4.88	10	-0.2	0.486	-0.4	4.74	0.0732	-1.2	0.1	0	0	0
ENSG00000135298	BAI3	brain-specific angiogenesis inhibitor 3	plasma membrane|integral component of membrane|	G-protein coupled receptor signaling pathway|neuropeptide signaling pathway|negative regulation of angiogenesis|	G-protein coupled receptor activity|	10	-0.4	3.8	10	-0.4	1.17	-0.4	4.72	0.0737	-1.3	0.2	0	0	0
ENSG00000189077	TMEM120A	transmembrane protein 120A	cellular_component|integral component of membrane|	biological_process|	molecular_function|	10	1.2	7.87	10	-1.4	3.98	1.2	4.68	0.0744	-1.4	2	0	0	0
ENSG00000198270	TMEM116	transmembrane protein 116	cellular_component|integral component of membrane|	biological_process|	molecular_function|	10	0.1	0.239	10	0.7	6.28	0.6	4.68	0.0744	-0.4	1.5	0	0	0
ENSG00000152078	TMEM56	transmembrane protein 56	cellular_component|integral component of membrane|	biological_process|	molecular_function|	10	-0.4	3.18	10	-0.3	1.98	-0.4	4.67	0.0747	-1.1	0.2	0	0	0
ENSG00000143612	C1ORF43	chromosome 1 open reading frame 43	integral component of membrane|	oxidation-reduction process|	oxidoreductase activity, acting on the CH-OH group of donors, NAD or NADP as acceptor|coenzyme binding|	10	-0.4	2.81	10	-0.4	2.13	-0.4	4.67	0.0747	-1.2	0.1	0	0	0
ENSG00000168785	TSPAN5	tetraspanin 5	plasma membrane|integral component of membrane|	positive regulation of Notch signaling pathway|protein maturation|establishment of protein localization to plasma membrane|	enzyme binding|	10	0.7	1.67	10	0.6	3.36	0.6	4.67	0.0747	-0.1	1.4	0	0	0
ENSG00000146904	EPHA1	EPH receptor A1	integral component of plasma membrane|	angiogenesis|positive regulation of cell-matrix adhesion|negative regulation of protein kinase activity|cell surface receptor signaling pathway|positive regulation of cell proliferation|peptidyl-tyrosine phosphorylation|positive regulation of cell migration|negative regulation of cell migration|regulation of Rac GTPase activity|activation of Rho GTPase activity|substrate adhesion-dependent cell s…	protein kinase activity|transmembrane-ephrin receptor activity|ATP binding|protein kinase binding|	10	-0.6	2.96	10	-0.3	2.35	-0.6	4.65	0.0751	-1.5	0.5	0	0	0
ENSG00000102125	TAZ	tafazzin	mitochondrion|mitochondrion|mitochondrial inner membrane|integral component of membrane|	phospholipid metabolic process|muscle contraction|heart development|skeletal muscle tissue development|hemopoiesis|cardiolipin biosynthetic process|mitochondrial respiratory chain complex I assembly|cardiolipin acyl-chain remodeling|cristae formation|mitochondrial ATP synthesis coupled electron transport|small molecule metabolic process|glycerophospholipid biosynthetic process|cardiac muscle tiss…	1-acylglycerophosphocholine O-acyltransferase activity|	10	0.8	4.84	10	-1.3	3.88	0.7	4.64	0.0754	-1.5	2	0	0	0
ENSG00000176922	OR51S1	olfactory receptor, family 51, subfamily S, member 1	plasma membrane|integral component of membrane|	G-protein coupled receptor signaling pathway|detection of chemical stimulus involved in sensory perception of smell|	G-protein coupled receptor activity|olfactory receptor activity|	10	-0.1	0.0678	10	-0.5	6.16	-0.3	4.63	0.0756	-1.3	0.1	0	0	0
ENSG00000137210	TMEM14B	transmembrane protein 14B	integral component of membrane|	None	None	10	0.4	5.49	10	0	0	0.3	4.61	0.0762	-0.1	1.1	0	0	0
ENSG00000100926	TM9SF1	transmembrane 9 superfamily member 1	autophagic vacuole membrane|lysosomal membrane|integral component of membrane|cytoplasmic vesicle|	autophagy|	None	10	-0.6	5.37	10	0.1	0.11	-0.6	4.6	0.0765	-1.5	0.2	0	0	0
ENSG00000181291	TMEM132E	transmembrane protein 132E	integral component of membrane|	None	None	10	-0.3	2.91	10	0.5	7.28	0.5	4.57	0.0775	-0.6	1.5	0	0	0
ENSG00000166292	TMEM100	transmembrane protein 100	endoplasmic reticulum|plasma membrane|integral component of membrane|perikaryon|perinuclear region of cytoplasm|	angiogenesis|vasculogenesis|in utero embryonic development|Notch signaling pathway|BMP signaling pathway|protein kinase B signaling|positive regulation of endothelial cell differentiation|arterial endothelial cell differentiation|cellular response to BMP stimulus|positive regulation of vasculogenesis|	molecular_function|	10	-0.3	1.22	10	-0.5	4.47	-0.4	4.56	0.0777	-1.2	0.1	0	0	0
ENSG00000154721	JAM2	junctional adhesion molecule 2	plasma membrane|integral component of plasma membrane|tight junction|	negative regulation of cell adhesion|blood coagulation|single organismal cell-cell adhesion|extracellular matrix organization|leukocyte migration|	protein binding|protein heterodimerization activity|	10	-0.4	2.24	10	-0.3	2.69	-0.3	4.56	0.0777	-1.1	0.6	0	0	0
ENSG00000143815	LBR	lamin B receptor	nuclear envelope|integral component of nuclear inner membrane|mitochondrion|membrane|integral component of membrane|nuclear membrane|	cholesterol biosynthetic process|small molecule metabolic process|oxidation-reduction process|	DNA binding|protein binding|lamin binding|oxidoreductase activity, acting on the CH-CH group of donors, NAD or NADP as acceptor|poly(A) RNA binding|chromo shadow domain binding|	10	-0.7	3.32	10	-0.3	1.84	-0.4	4.55	0.078	-1.6	0.4	0	0	0
ENSG00000069702	TGFBR3	transforming growth factor, beta receptor III	proteinaceous extracellular matrix|extracellular space|extracellular space|endoplasmic reticulum|integral component of plasma membrane|external side of plasma membrane|cell surface|inhibin-betaglycan-ActRII complex|extracellular vesicular exosome|	blood vessel development|response to hypoxia|blastocyst development|epithelial to mesenchymal transition|liver development|heart morphogenesis|immune response|transforming growth factor beta receptor signaling pathway|transforming growth factor beta receptor signaling pathway|transforming growth factor beta receptor complex assembly|negative regulation of epithelial cell migration|negative regula…	transforming growth factor beta-activated receptor activity|type II transforming growth factor beta receptor binding|transforming growth factor beta receptor binding|protein binding|protein binding|glycosaminoglycan binding|glycosaminoglycan binding|heparin binding|coreceptor activity|fibroblast growth factor binding|PDZ domain binding|SMAD binding|activin binding|transforming growth factor beta …	10	-0.2	1.1	10	-0.3	3.96	-0.3	4.54	0.0783	-1	1.1	0	0	0
ENSG00000160305	DIP2A	DIP2 disco-interacting protein 2 homolog A (Drosophila)	nucleus|cell surface|	multicellular organismal development|metabolic process|negative regulation of gene expression|regulation of apoptotic process|	catalytic activity|protein binding|transcription factor binding|	10	0.4	5.82	10	0.1	0.0565	0.4	4.53	0.0786	-0.4	1.4	0	0	0
ENSG00000117114	LPHN2	latrophilin 2	plasma membrane|integral component of membrane|	G-protein coupled receptor signaling pathway|neuropeptide signaling pathway|	G-protein coupled receptor activity|latrotoxin receptor activity|carbohydrate binding|	10	-0.3	1.26	10	-0.6	4.19	-0.4	4.53	0.0786	-1.3	0.1	0	0	0
ENSG00000185254	TEX28	testis expressed 28	integral component of membrane|	biological_process|	molecular_function|	1	-1.2	5.38	1	0	0	-1.2	4.52	0.0788	-2	0.8	0	0	0
ENSG00000184584	TMEM173	transmembrane protein 173	mitochondrial outer membrane|peroxisome|endoplasmic reticulum membrane|endoplasmic reticulum membrane|Golgi apparatus|plasma membrane|integral component of membrane|cytoplasmic vesicle membrane|perinuclear region of cytoplasm|	activation of innate immune response|positive regulation of defense response to virus by host|apoptotic process|positive regulation of protein binding|regulation of type I interferon production|positive regulation of type I interferon production|interferon-beta production|interferon-beta production|positive regulation of protein import into nucleus, translocation|cellular response to interferon-b…	protein binding|transcription factor binding|protein kinase binding|protein kinase binding|ubiquitin protein ligase binding|cyclic-di-GMP binding|identical protein binding|protein homodimerization activity|cyclic-GMP-AMP binding|	10	-0.5	3.21	10	-0.3	2.22	-0.4	4.52	0.0788	-1.4	0.2	0	0	0
ENSG00000156395	SORCS3	sortilin-related VPS10 domain containing receptor 3	membrane|integral component of membrane|	neuropeptide signaling pathway|	neuropeptide receptor activity|	10	-0.1	0.478	10	-1.7	7.35	-1.7	4.5	0.0793	-3	-0.1	0	0	0
ENSG00000102539	MLNR	motilin receptor	plasma membrane|integral component of plasma membrane|	G-protein coupled receptor signaling pathway|digestion|	G-protein coupled receptor activity|growth hormone-releasing hormone receptor activity|	10	-0.3	0.831	10	-0.9	4.33	-0.7	4.5	0.0793	-1.8	0.4	0	0	0
ENSG00000258941	RP11-407N17.3	N/A	None	None	None	5	-0.5	6.21	5	0	0	-0.5	4.49	0.0796	-1.9	0.2	0	0	0
ENSG00000186306	OR10T2	olfactory receptor, family 10, subfamily T, member 2	plasma membrane|integral component of membrane|	G-protein coupled receptor signaling pathway|detection of chemical stimulus involved in sensory perception of smell|	G-protein coupled receptor activity|olfactory receptor activity|	10	-0.7	4.1	10	-0.2	1.19	-0.7	4.49	0.0796	-1.7	0	0	0	0
ENSG00000169550	MUC15	mucin 15, cell surface associated	extracellular region|Golgi lumen|plasma membrane|integral component of membrane|	O-glycan processing|post-translational protein modification|cellular protein metabolic process|	None	10	0.5	5.27	10	0.1	0.856	0.3	4.49	0.0796	-1.1	1.3	0	0	0
ENSG00000228300	C19ORF24	chromosome 19 open reading frame 24	extracellular region|cytoplasm|integral component of membrane|	None	None	10	-0.4	2	10	-0.3	2.75	-0.3	4.44	0.081	-1.1	0.7	0	0	0
ENSG00000176555	OR4S1	olfactory receptor, family 4, subfamily S, member 1	plasma membrane|integral component of membrane|	G-protein coupled receptor signaling pathway|detection of chemical stimulus involved in sensory perception of smell|	G-protein coupled receptor activity|olfactory receptor activity|	10	1	7.25	10	0	0	0.9	4.42	0.0815	-2.4	2	0	0	0
ENSG00000176798	OR51L1	olfactory receptor, family 51, subfamily L, member 1	plasma membrane|integral component of membrane|	G-protein coupled receptor signaling pathway|detection of chemical stimulus involved in sensory perception of smell|	G-protein coupled receptor activity|olfactory receptor activity|	10	0.2	0.886	10	-0.4	4.25	-0.3	4.4	0.0821	-1.1	0.5	0	0	0
ENSG00000144824	PHLDB2	pleckstrin homology-like domain, family B, member 2	cytoplasm|plasma membrane|intermediate filament cytoskeleton|	None	protein binding|	10	0.7	5.03	9	0.3	1.3	0.6	4.39	0.0824	-0.2	1.7	0	0	0
ENSG00000125247	TMTC4	transmembrane and tetratricopeptide repeat containing 4	integral component of membrane|	None	None	10	-0.5	3.27	10	-0.3	1.47	-0.5	4.37	0.083	-1.4	0	0	0	0
ENSG00000162460	TMEM82	transmembrane protein 82	integral component of membrane|	None	None	10	-0.8	4.33	10	1.1	5.07	1	4.37	0.083	-1.2	2	0	0	0
ENSG00000011347	SYT7	synaptotagmin VII	lysosome|plasma membrane|integral component of membrane|cell junction|synaptic vesicle membrane|dense core granule|	plasma membrane repair|exocytosis|positive regulation of calcium ion-dependent exocytosis|regulation of insulin secretion|	transporter activity|calcium ion binding|	10	1.8	7.91	10	0	0	1.8	4.35	0.0836	-0.2	3	0	0	0
ENSG00000112339	HBS1L	HBS1-like translational GTPase	membrane|extracellular vesicular exosome|	GTP catabolic process|translation|translational elongation|signal transduction|	translation elongation factor activity|GTPase activity|GTP binding|	10	0.1	0.064	10	1.5	7.28	1.4	4.35	0.0836	-0.3	3	0	0	0
ENSG00000111729	CLEC4A	C-type lectin domain family 4, member A	integral component of plasma membrane|	cell adhesion|cell surface receptor signaling pathway|innate immune response|	transmembrane signaling receptor activity|carbohydrate binding|	10	-0.7	1.55	10	-1.2	4.28	-1.2	4.34	0.084	-2	-0.1	0	0	0
ENSG00000184716	SERINC4	serine incorporator 4	integral component of membrane|	phospholipid biosynthetic process|	None	10	0.5	7	10	-0.4	3.4	0.4	4.33	0.0843	-0.7	1.4	0	0	0
ENSG00000129625	REEP5	receptor accessory protein 5	integral component of membrane|extracellular vesicular exosome|	biological_process|	molecular_function|protein binding|	10	-0.6	1.79	10	-0.5	2.93	-0.6	4.32	0.0845	-1.6	0.4	0	0	0
ENSG00000091972	CD200	CD200 molecule	plasma membrane|integral component of plasma membrane|	regulation of immune response|	protein binding|	10	0.7	6.83	10	-0.4	1.87	0.6	4.31	0.0847	-0.5	1.7	0	0	0
ENSG00000146399	TAAR1	trace amine associated receptor 1	plasma membrane|integral component of membrane|	G-protein coupled receptor signaling pathway|	trace-amine receptor activity|G-protein coupled receptor activity|	10	0	0	10	-0.5	6.19	-0.4	4.28	0.0856	-1.5	0.3	0	0	0
ENSG00000135404	CD63	CD63 molecule	lysosomal membrane|plasma membrane|integral component of plasma membrane|cell surface|endosome membrane|platelet dense granule membrane|intrinsic component of plasma membrane|late endosome membrane|melanosome|extracellular vesicular exosome|multivesicular body, internal vesicle|	positive regulation of receptor internalization|platelet degranulation|cell-matrix adhesion|blood coagulation|protein transport|cell migration|platelet activation|cellular protein localization|endosome to melanosome transport|pigment granule maturation|regulation of vascular endothelial growth factor signaling pathway|regulation of rubidium ion transport|positive regulation of integrin-mediated s…	protein binding|	10	-0.1	0.188	10	-0.5	5.21	-0.5	4.28	0.0856	-1.5	0.3	0	0	0
ENSG00000126259	KIRREL2	kin of IRRE like 2 (Drosophila)	plasma membrane|integral component of membrane|slit diaphragm|	negative regulation of protein phosphorylation|cell adhesion|single organismal cell-cell adhesion|	None	10	0.3	4.2	10	0.2	0.497	0.3	4.28	0.0856	-0.5	1.2	0	0	0
ENSG00000148483	TMEM236	transmembrane protein 236	integral component of membrane|	None	None	10	0.4	4.23	10	0.2	1.09	0.3	4.27	0.086	-0.2	1.2	0	0	0
ENSG00000177150	FAM210A	family with sequence similarity 210, member A	mitochondrion|integral component of membrane|	None	None	10	-0.4	2.9	10	-0.2	2	-0.3	4.27	0.086	-1.3	0.2	0	0	0
ENSG00000204642	HLA-F	major histocompatibility complex, class I, F	Golgi membrane|endoplasmic reticulum|plasma membrane|ER to Golgi transport vesicle membrane|membrane|phagocytic vesicle membrane|early endosome membrane|MHC class I protein complex|integral component of lumenal side of endoplasmic reticulum membrane|	positive regulation of T cell mediated cytotoxicity|antigen processing and presentation of peptide antigen via MHC class I|antigen processing and presentation of exogenous peptide antigen via MHC class I, TAP-dependent|antigen processing and presentation of exogenous peptide antigen via MHC class I, TAP-independent|cytokine-mediated signaling pathway|antigen processing and presentation of exogeno…	peptide antigen binding|TAP1 binding|TAP2 binding|	10	-0.6	3.97	10	-0.4	0.716	-0.6	4.27	0.086	-1.5	0.3	0	0	0
ENSG00000174125	TLR1	toll-like receptor 1	plasma membrane|integral component of plasma membrane|membrane|phagocytic vesicle membrane|Toll-like receptor 1-Toll-like receptor 2 protein complex|	MyD88-dependent toll-like receptor signaling pathway|inflammatory response|immune response|signal transduction|toll-like receptor 1 signaling pathway|macrophage activation|detection of triacyl bacterial lipopeptide|positive regulation of tumor necrosis factor biosynthetic process|innate immune response|positive regulation of interleukin-6 biosynthetic process|regulation of cytokine secretion|cell…	receptor activity|transmembrane signaling receptor activity|protein heterodimerization activity|	10	-0.5	4.88	10	0.1	0.278	-0.5	4.26	0.0862	-1.5	0.4	0	0	0
ENSG00000078403	MLLT10	myeloid/lymphoid or mixed-lineage leukemia (trithorax homolog, Drosophila); translocated to, 10	nucleus|cytoplasm|	transcription, DNA-templated|positive regulation of transcription from RNA polymerase II promoter|	DNA binding|sequence-specific DNA binding transcription factor activity|protein binding|zinc ion binding|	10	-0.2	0.545	10	1.1	7.21	1.1	4.26	0.0862	0	2	0	0	0
ENSG00000072849	DERL2	derlin 2	early endosome|late endosome|endoplasmic reticulum|membrane|integral component of endoplasmic reticulum membrane|	suckling behavior|positive regulation of cell proliferation|positive regulation of cell growth|ER-associated ubiquitin-dependent protein catabolic process|endoplasmic reticulum unfolded protein response|retrograde protein transport, ER to cytosol|	protein binding|	8	-1.3	1.89	8	-1	3.33	-1.2	4.26	0.0862	-2	0.6	0	0	0
ENSG00000170412	GPRC5C	G protein-coupled receptor, class C, group 5, member C	mitochondrion|integral component of plasma membrane|cytoplasmic vesicle membrane|receptor complex|extracellular vesicular exosome|	G-protein coupled receptor signaling pathway|	G-protein coupled receptor activity|	10	0.3	4.26	10	0.1	0.675	0.3	4.25	0.0867	-0.5	1.1	0	0	0
ENSG00000121853	GHSR	growth hormone secretagogue receptor	plasma membrane|cell surface|integral component of membrane|neuron projection|membrane raft|	G-protein coupled receptor signaling pathway|actin polymerization or depolymerization|adult feeding behavior|response to hormone|hormone-mediated signaling pathway|growth hormone secretion|response to food|positive regulation of appetite|negative regulation of interleukin-1 beta production|cellular response to insulin stimulus|positive regulation of multicellular organism growth|negative regulati…	growth hormone secretagogue receptor activity|G-protein coupled receptor activity|growth hormone-releasing hormone receptor activity|peptide hormone binding|	10	-0.5	4.7	10	-0.2	0.515	-0.4	4.25	0.0867	-1.4	0.2	0	0	0
ENSG00000145495	2020-03-06	membrane-associated ring finger (C3HC4) 6, E3 ubiquitin protein ligase	membrane|integral component of endoplasmic reticulum membrane|	protein K48-linked ubiquitination|	ubiquitin-protein transferase activity|ubiquitin-protein transferase activity|zinc ion binding|ligase activity|enzyme binding|ubiquitin conjugating enzyme binding|	10	-0.2	0.797	10	-1	5.15	-0.4	4.24	0.087	-1.8	0.1	0	0	0
ENSG00000158457	TSPAN33	tetraspanin 33	plasma membrane|integral component of membrane|	protein maturation|establishment of protein localization to plasma membrane|	enzyme binding|	10	0.6	3.07	10	0.9	2.28	0.8	4.23	0.0873	0	1.8	0	0	0
ENSG00000139187	KLRG1	killer cell lectin-like receptor subfamily G, member 1	plasma membrane|integral component of membrane|	inflammatory response|cellular defense response|cell surface receptor signaling pathway|innate immune response|regulation of immune response|	receptor activity|carbohydrate binding|	10	-0.1	0.214	10	1.5	7.53	1.4	4.23	0.0873	0.1	3	0	0	0
ENSG00000196963	PCDHB16	protocadherin beta 16	plasma membrane|integral component of membrane|	homophilic cell adhesion|synaptic transmission|synapse assembly|calcium-dependent cell-cell adhesion|	calcium ion binding|	10	0.8	3.24	10	0.3	3.54	0.5	4.23	0.0873	-0.2	1.5	0	0	0
ENSG00000168787	OR12D2	olfactory receptor, family 12, subfamily D, member 2	plasma membrane|integral component of membrane|	G-protein coupled receptor signaling pathway|detection of chemical stimulus involved in sensory perception of smell|	G-protein coupled receptor activity|olfactory receptor activity|	10	-1.2	7.49	10	0	0	-1.1	4.21	0.088	-2	0	0	0	0
ENSG00000140526	ABHD2	abhydrolase domain containing 2	integral component of membrane|	biological_process|metabolic process|response to wounding|negative regulation of cell migration|	molecular_function|hydrolase activity|	10	-0.4	3.48	10	-0.2	1.02	-0.3	4.21	0.088	-1.2	0.3	0	0	0
ENSG00000133106	EPSTI1	epithelial stromal interaction 1 (breast)	None	None	None	10	0.5	2.97	10	0.3	1.65	0.5	4.2	0.0885	-0.9	1.3	0	0	0
ENSG00000144407	PTH2R	parathyroid hormone 2 receptor	plasma membrane|integral component of plasma membrane|	G-protein coupled receptor signaling pathway|	parathyroid hormone receptor activity|	10	-0.2	0.543	10	-0.4	4.55	-0.4	4.2	0.0885	-1.3	0.4	0	0	0
ENSG00000104870	FCGRT	Fc fragment of IgG, receptor, transporter, alpha	plasma membrane|integral component of membrane|	IgG immunoglobulin transcytosis in epithelial cells mediated by FcRn immunoglobulin receptor|immune response|antigen processing and presentation|Fc-gamma receptor signaling pathway|	IgG binding|beta-2-microglobulin binding|	10	-1.7	7.36	10	-0.1	0.184	-1.7	4.2	0.0885	-3	-0.3	0	0	0
ENSG00000155755	TMEM237	transmembrane protein 237	membrane|integral component of membrane|ciliary transition zone|	regulation of Wnt signaling pathway|cilium assembly|	None	10	1	2.41	10	0.4	3.06	0.8	4.19	0.0887	0	1.7	0	0	0
ENSG00000115590	IL1R2	interleukin 1 receptor, type II	extracellular region|plasma membrane|integral component of membrane|	immune response|cytokine-mediated signaling pathway|cytokine-mediated signaling pathway|	interleukin-1 receptor activity|interleukin-1, Type II, blocking receptor activity|protein binding|	10	0.1	1.02	10	0.3	4.21	0.2	4.17	0.0893	-0.5	1.1	0	0	0
ENSG00000230301	OR5H6	olfactory receptor, family 5, subfamily H, member 6	plasma membrane|integral component of membrane|	G-protein coupled receptor signaling pathway|detection of chemical stimulus involved in sensory perception of smell|	G-protein coupled receptor activity|olfactory receptor activity|	10	0.5	4.6	10	-0.7	1.6	-0.7	4.16	0.0897	-1.6	0.9	0	0	0
ENSG00000134343	ANO3	anoctamin 3	plasma membrane|integral component of membrane|	ion transmembrane transport|transmembrane transport|	None	10	-0.1	0.416	10	0.3	4.92	0.3	4.15	0.09	-0.6	1.4	0	0	0
ENSG00000000005	TNMD	tenomodulin	nuclear envelope|cytoplasm|integral component of membrane|	endothelial cell morphogenesis|negative regulation of endothelial cell proliferation|negative regulation of angiogenesis|tendon cell differentiation|cellular response to BMP stimulus|	None	10	0.3	1.05	10	0.5	3.58	0.4	4.14	0.0902	-0.2	1.3	0	0	0
ENSG00000123146	CD97	CD97 molecule	extracellular space|plasma membrane|integral component of plasma membrane|membrane|extracellular vesicular exosome|	cellular component movement|inflammatory response|immune response|cell adhesion|cell surface receptor signaling pathway|G-protein coupled receptor signaling pathway|neuropeptide signaling pathway|cell-cell signaling|	transmembrane signaling receptor activity|G-protein coupled receptor activity|calcium ion binding|protein binding|	10	-0.1	0.369	10	-0.4	4.68	-0.3	4.14	0.0902	-1.5	0.2	0	0	0
ENSG00000061656	SPAG4	sperm associated antigen 4	cytoplasm|cytoskeleton|cilium|integral component of membrane|	spermatogenesis|	structural molecule activity|	10	-0.3	4.15	10	-0.2	0.424	-0.3	4.13	0.0906	-1.1	0.4	0	0	0
ENSG00000175414	ARL10	ADP-ribosylation factor-like 10	intracellular|	small GTPase mediated signal transduction|	GTP binding|	10	-0.6	1.86	10	-0.3	3.29	-0.3	4.12	0.0909	-1.3	0.1	0	0	0
ENSG00000144567	FAM134A	family with sequence similarity 134, member A	integral component of membrane|	None	None	10	-0.7	3.29	10	-0.9	1.62	-0.7	4.12	0.0909	-1.9	0.8	0	0	0
ENSG00000130054	FAM155B	family with sequence similarity 155, member B	integral component of membrane|	None	None	10	1.2	6.46	10	0.3	0.208	1.1	4.11	0.0913	0.1	2	0	0	0
ENSG00000172457	OR9G4	olfactory receptor, family 9, subfamily G, member 4	plasma membrane|integral component of membrane|	G-protein coupled receptor signaling pathway|detection of chemical stimulus involved in sensory perception of smell|	G-protein coupled receptor activity|olfactory receptor activity|	10	-0.4	2.89	10	-0.2	2.44	-0.2	4.1	0.0916	-1.2	0.4	0	0	0
ENSG00000127533	F2RL3	coagulation factor II (thrombin) receptor-like 3	extracellular region|plasma membrane|integral component of plasma membrane|	signal transduction|phospholipase C-activating G-protein coupled receptor signaling pathway|blood coagulation|response to wounding|platelet activation|positive regulation of release of sequestered calcium ion into cytosol|platelet dense granule organization|thrombin receptor signaling pathway|	thrombin receptor activity|	10	0.3	5.87	10	0	0	0.3	4.1	0.0916	-0.2	1.2	0	0	0
ENSG00000153294	GPR115	G protein-coupled receptor 115	plasma membrane|integral component of membrane|	G-protein coupled receptor signaling pathway|neuropeptide signaling pathway|	G-protein coupled receptor activity|	10	-0.9	6.76	10	0.2	0.843	-0.8	4.09	0.092	-1.9	0.3	0	0	0
ENSG00000213853	EMP2	epithelial membrane protein 2	integral component of membrane|apical plasma membrane|	positive regulation of cell-matrix adhesion|cell proliferation|positive regulation of integrin-mediated signaling pathway|	integrin binding|	10	-0.3	2.4	10	-0.3	1.94	-0.3	4.09	0.092	-1.2	1.1	0	0	0
ENSG00000113555	PCDH12	protocadherin 12	plasma membrane|integral component of plasma membrane|cell-cell junction|extracellular vesicular exosome|	glycogen metabolic process|homophilic cell adhesion|neuron recognition|calcium-dependent cell-cell adhesion|labyrinthine layer development|	calcium ion binding|	9	0.5	6.29	9	0	0	0.4	4.08	0.0924	-0.1	1.6	0	0	0
ENSG00000142089	IFITM3	interferon induced transmembrane protein 3	lysosomal membrane|plasma membrane|plasma membrane|integral component of membrane|late endosome membrane|extracellular vesicular exosome|	immune response|response to virus|cytokine-mediated signaling pathway|negative regulation of viral transcription|response to interferon-gamma|response to interferon-alpha|response to interferon-beta|negative regulation of viral genome replication|negative regulation of viral entry into host cell|defense response to virus|type I interferon signaling pathway|	protein binding|	10	1.6	7.33	10	-1.2	5.62	1.6	4.08	0.0924	-1.5	3	0	0	0
ENSG00000134313	KIDINS220	kinase D-interacting substrate, 220kDa	late endosome|cytosol|membrane|integral component of membrane|protein complex|	activation of MAPKK activity|in utero embryonic development|positive regulation of neuron projection development|cytoplasmic transport|nerve growth factor signaling pathway|neurotrophin TRK receptor signaling pathway|dendrite morphogenesis|cellular response to nerve growth factor stimulus|	PDZ domain binding|	10	-0.5	3.58	10	0.7	2.04	1	4.07	0.0928	-0.7	2	0	0	0
ENSG00000123338	NCKAP1L	NCK-associated protein 1-like	cytosol|integral component of plasma membrane|membrane|SCAR complex|extracellular vesicular exosome|	B cell homeostasis|myeloid cell homeostasis|protein complex assembly|chemotaxis|maintenance of cell polarity|neutrophil chemotaxis|positive regulation of actin filament polymerization|cortical actin cytoskeleton organization|positive regulation of B cell proliferation|negative regulation of interleukin-17 production|negative regulation of interleukin-6 production|positive regulation of Rac GTPase…	protein binding|protein kinase activator activity|Rac GTPase activator activity|protein complex binding|	10	-0.5	4.13	10	-0.1	0.283	-0.5	4.07	0.0928	-1.4	0.8	0	0	0
ENSG00000088726	TMEM40	transmembrane protein 40	integral component of membrane|	None	None	10	0.3	2.5	10	0.3	1.82	0.3	4.07	0.0928	-1.4	1.2	0	0	0
ENSG00000180475	OR10Q1	olfactory receptor, family 10, subfamily Q, member 1	plasma membrane|integral component of membrane|	G-protein coupled receptor signaling pathway|detection of chemical stimulus involved in sensory perception of smell|	G-protein coupled receptor activity|olfactory receptor activity|	10	-0.3	2.36	10	-0.5	2.14	-0.4	4.06	0.0932	-1.5	0.4	0	0	0
ENSG00000150093	ITGB1	integrin, beta 1 (fibronectin receptor, beta polypeptide, antigen CD29 includes MDF2, MSK12)	acrosomal vesicle|ruffle|basement membrane|cytoplasm|plasma membrane|plasma membrane|focal adhesion|focal adhesion|integrin complex|external side of plasma membrane|cell surface|intercalated disc|membrane|lamellipodium|hemidesmosome|filopodium|neuromuscular junction|cleavage furrow|ruffle membrane|integrin alpha3-beta1 complex|integrin alpha7-beta1 complex|integrin alpha8-beta1 complex|integrin a…	G1/S transition of mitotic cell cycle|in utero embryonic development|cell fate specification|tissue homeostasis|cell migration involved in sprouting angiogenesis|cellular calcium ion homeostasis|cellular defense response|homophilic cell adhesion|leukocyte cell-cell adhesion|cell-matrix adhesion|calcium-independent cell-matrix adhesion|integrin-mediated signaling pathway|axon guidance|blood coagul…	virus receptor activity|glycoprotein binding|fibronectin binding|protease binding|actin binding|integrin binding|protein binding|collagen binding|protein kinase binding|protein domain specific binding|peptide binding|laminin binding|metal ion binding|protein heterodimerization activity|cell adhesion molecule binding|alpha-actinin binding|	10	-0.7	1.68	10	-0.5	2.75	-0.6	4.05	0.0936	-1.6	0.3	0	0	0
ENSG00000167371	PRRT2	proline-rich transmembrane protein 2	plasma membrane|integral component of membrane|cell junction|synapse|	response to biotic stimulus|neuromuscular process controlling posture|	None	10	-0.5	5.76	10	0	0	-0.4	4.05	0.0936	-1.4	0.1	0	0	0
ENSG00000089692	LAG3	lymphocyte-activation gene 3	external side of plasma membrane|integral component of membrane|	cell surface receptor signaling pathway|negative regulation of interleukin-2 biosynthetic process|positive regulation of natural killer cell mediated cytotoxicity|negative regulation of T cell activation|	antigen binding|transmembrane signaling receptor activity|MHC class II protein binding|	10	-0.3	2.67	10	-0.2	1.87	-0.2	4.04	0.0939	-1	0.3	0	0	0
ENSG00000140563	MCTP2	multiple C2 domains, transmembrane 2	membrane|integral component of membrane|	calcium-mediated signaling|	calcium ion binding|	9	-0.5	3.77	9	0.2	1.09	-0.5	4.03	0.0943	-1.5	0.6	0	0	0
ENSG00000072274	TFRC	transferrin receptor	extracellular region|extracellular space|endosome|plasma membrane|integral component of plasma membrane|coated pit|external side of plasma membrane|cell surface|membrane|cytoplasmic membrane-bounded vesicle|melanosome|intracellular membrane-bounded organelle|perinuclear region of cytoplasm|extracellular vesicular exosome|blood microparticle|	proteolysis|cellular iron ion homeostasis|cellular iron ion homeostasis|receptor-mediated endocytosis|receptor-mediated endocytosis|viral process|osteoclast differentiation|transferrin transport|positive regulation of bone resorption|transmembrane transport|iron ion import|	double-stranded RNA binding|transferrin receptor activity|protein binding|peptidase activity|identical protein binding|poly(A) RNA binding|	10	0	0	10	-0.8	6.42	-0.7	4.03	0.0943	-1.8	0.3	0	0	0
ENSG00000054277	OPN3	opsin 3	integral component of plasma membrane|integral component of membrane|	G-protein coupled receptor signaling pathway|phototransduction|detection of light stimulus|detection of visible light|protein-chromophore linkage|regulation of circadian rhythm|	G-protein coupled receptor activity|G-protein coupled photoreceptor activity|photoreceptor activity|	10	0.3	3.23	10	0.3	1.02	0.3	4.02	0.0947	-0.4	1.2	0	0	0
ENSG00000213625	LEPROT	leptin receptor overlapping transcript	Golgi membrane|endosome|Golgi apparatus|endosome membrane|integral component of membrane|	negative regulation of JAK-STAT cascade|negative regulation of growth hormone receptor signaling pathway|negative regulation of protein localization to cell surface|	receptor binding|	10	-0.2	1.39	10	-0.7	3.6	-0.6	4.02	0.0947	-1.5	0.1	0	0	0
ENSG00000185737	NRG3	neuregulin 3	extracellular region|integral component of plasma membrane|	regulation of cell growth|activation of transmembrane receptor protein tyrosine kinase activity|pattern specification process|mammary placode formation|	growth factor activity|transmembrane receptor protein tyrosine kinase activator activity|receptor tyrosine kinase binding|	10	1	1.33	10	0.6	4.44	0.8	4.01	0.0952	0	1.8	0	0	0
ENSG00000142512	SIGLEC10	sialic acid binding Ig-like lectin 10	extracellular region|plasma membrane|integral component of membrane|	cell adhesion|	None	10	-0.3	1.18	10	-0.4	3.46	-0.3	3.99	0.0959	-1.4	0.1	0	0	0
ENSG00000186509	OR9Q1	olfactory receptor, family 9, subfamily Q, member 1	plasma membrane|integral component of membrane|	G-protein coupled receptor signaling pathway|detection of chemical stimulus involved in sensory perception of smell|	G-protein coupled receptor activity|olfactory receptor activity|	10	0.6	5.07	10	-0.2	0.556	0.5	3.98	0.0962	-0.4	1.5	0	0	0
ENSG00000094661	OR1I1	olfactory receptor, family 1, subfamily I, member 1	plasma membrane|integral component of membrane|	G-protein coupled receptor signaling pathway|detection of chemical stimulus involved in sensory perception of smell|	G-protein coupled receptor activity|olfactory receptor activity|	10	0.5	3.62	10	-1	3.55	-0.2	3.98	0.0962	-1.8	0.9	0	0	0
ENSG00000171714	ANO5	anoctamin 5	intracellular|endoplasmic reticulum membrane|plasma membrane|plasma membrane|integral component of membrane|	chloride transport|ion transmembrane transport|transmembrane transport|chloride transmembrane transport|	intracellular calcium activated chloride channel activity|	10	-0.2	0.357	10	-0.4	4.18	-0.4	3.98	0.0962	-1.3	0.2	0	0	0
ENSG00000166265	CYYR1	cysteine/tyrosine-rich 1	integral component of membrane|	biological_process|	molecular_function|	10	1.2	7.41	10	-0.1	0.238	1.2	3.97	0.0965	-0.5	2	0	0	0
ENSG00000166959	MS4A8	membrane-spanning 4-domains, subfamily A, member 8	integral component of membrane|	None	None	10	-1	1.31	10	0.4	4.6	0.4	3.96	0.0969	-1.4	1.3	0	0	0
ENSG00000138161	CUZD1	CUB and zona pellucida-like domains 1	integral component of membrane|transport vesicle membrane|zymogen granule membrane|	substrate-dependent cell migration, cell attachment to substrate|cell cycle|cell proliferation|trypsinogen activation|cell division|	None	10	0.5	6.19	10	-0.2	1.5	0.4	3.96	0.0969	-0.5	1.4	0	0	0
ENSG00000254692	TM9SF1	transmembrane 9 superfamily member 1	autophagic vacuole membrane|lysosomal membrane|integral component of membrane|cytoplasmic vesicle|	autophagy|	None	3	0.4	1.93	3	0.7	2.87	0.6	3.96	0.0969	-0.6	2	0	0	0
ENSG00000184014	DENND5A	DENN/MADD domain containing 5A	Golgi apparatus|membrane|	positive regulation of Rab GTPase activity|	Rab guanyl-nucleotide exchange factor activity|Rab GTPase binding|	10	0.4	5.74	10	-0.5	3.55	-0.5	3.95	0.0971	-1.5	1	0	0	0
ENSG00000134121	CHL1	cell adhesion molecule L1-like	proteinaceous extracellular matrix|plasma membrane|integral component of membrane|dendrite|apical part of cell|	neuron migration|cell adhesion|signal transduction|axon guidance|adult locomotory behavior|exploration behavior|negative regulation of neuron apoptotic process|cognition|	protease binding|	10	0.3	3.4	10	0.3	0.767	0.3	3.95	0.0971	-0.3	1.3	0	0	0
ENSG00000092931	MFSD11	major facilitator superfamily domain containing 11	cellular_component|integral component of membrane|	biological_process|	molecular_function|	10	-0.9	4.61	10	0	0	-0.8	3.94	0.0975	-1.9	0.2	0	0	0
ENSG00000168476	REEP4	receptor accessory protein 4	endoplasmic reticulum|endoplasmic reticulum membrane|microtubule|integral component of membrane|	nuclear envelope organization|mitotic nuclear division|mitotic nuclear envelope reassembly|	microtubule binding|	10	-0.2	1.64	10	-1.4	6.61	-0.3	3.94	0.0975	-2	0	0	0	0
ENSG00000134539	KLRD1	killer cell lectin-like receptor subfamily D, member 1	plasma membrane|external side of plasma membrane|integral component of membrane|	cell surface receptor signaling pathway|innate immune response|regulation of immune response|	transmembrane signaling receptor activity|protein binding|carbohydrate binding|	10	-0.3	2.84	10	-0.2	1.48	-0.3	3.93	0.0978	-1.2	0.2	0	0	0
ENSG00000132975	GPR12	G protein-coupled receptor 12	integral component of plasma membrane|	cellular calcium ion homeostasis|G-protein coupled receptor signaling pathway|	G-protein coupled receptor activity|phosphatidylcholine binding|	10	0.4	2.34	10	-0.4	4.35	-0.3	3.92	0.0982	-1.2	0.8	0	0	0
ENSG00000180016	OR1E1	olfactory receptor, family 1, subfamily E, member 1	plasma membrane|integral component of membrane|	G-protein coupled receptor signaling pathway|sensory perception of smell|detection of chemical stimulus involved in sensory perception of smell|detection of chemical stimulus involved in sensory perception of smell|	G-protein coupled receptor activity|olfactory receptor activity|	10	-0.8	6.49	10	0.3	0.523	-0.8	3.92	0.0982	-1.9	0.3	0	0	0
ENSG00000254834	OR5M10	olfactory receptor, family 5, subfamily M, member 10	plasma membrane|integral component of membrane|	G-protein coupled receptor signaling pathway|detection of chemical stimulus involved in sensory perception of smell|	G-protein coupled receptor activity|olfactory receptor activity|	10	0.9	3.3	10	-1	5.23	0.5	3.92	0.0982	-1.6	1.5	0	0	0
ENSG00000188807	TMEM201	transmembrane protein 201	nuclear inner membrane|integral component of membrane|	None	None	10	-1.3	4.83	10	-0.1	0.473	-0.2	3.91	0.0986	-1.9	0	0	0	0
ENSG00000172774	OR1S1	olfactory receptor, family 1, subfamily S, member 1	plasma membrane|integral component of membrane|	G-protein coupled receptor signaling pathway|detection of chemical stimulus involved in sensory perception of smell|	G-protein coupled receptor activity|olfactory receptor activity|	10	0.1	0.848	10	-0.5	4.42	-0.5	3.91	0.0986	-1.4	0.6	0	0	0
ENSG00000148358	GPR107	G protein-coupled receptor 107	integral component of membrane|	None	None	10	0	0	10	-0.5	5.79	-0.5	3.91	0.0986	-1.5	0.8	0	0	0
ENSG00000172322	CLEC12A	C-type lectin domain family 12, member A	plasma membrane|integral component of membrane|	None	carbohydrate binding|	10	0.8	4.98	10	0.2	2.76	0.3	3.91	0.0986	-2	2	0	0	0
ENSG00000067208	EVI5	ecotropic viral integration site 5	nucleus|Golgi apparatus|microtubule organizing center|spindle|intracellular membrane-bounded organelle|	cell cycle|multicellular organismal development|cell proliferation|positive regulation of Rab GTPase activity|cell division|	Rab GTPase activator activity|protein binding|	10	-0.3	1.09	10	1.1	4.84	1	3.91	0.0986	-0.5	2	0	0	0
ENSG00000112619	PRPH2	peripherin 2 (retinal degeneration, slow)	integral component of membrane|	cell adhesion|visual perception|retina development in camera-type eye|	None	10	-0.3	1.99	10	-0.6	3.25	-0.4	3.9	0.0989	-1.4	0.4	0	0	0
ENSG00000187824	TMEM220	transmembrane protein 220	integral component of membrane|	None	None	10	-0.5	4.4	10	0.6	1.94	-0.5	3.9	0.0989	-1.7	0.9	0	0	0
ENSG00000186952	TMEM232	transmembrane protein 232	integral component of membrane|	None	None	9	-0.8	4.47	9	0.3	2.99	-0.7	3.9	0.0989	-1.8	0.7	0	0	0
ENSG00000168818	STX18	syntaxin 18	Golgi membrane|endoplasmic reticulum|endoplasmic reticulum membrane|integral component of membrane|	intracellular protein transport|ER to Golgi vesicle-mediated transport|	SNAP receptor activity|protein binding|	10	-0.7	4.37	10	0.2	0.991	-0.8	3.9	0.0989	-1.8	0.2	0	0	0
ENSG00000221836	OR2A5	olfactory receptor, family 2, subfamily A, member 5	plasma membrane|integral component of membrane|	G-protein coupled receptor signaling pathway|detection of chemical stimulus involved in sensory perception of smell|	G-protein coupled receptor activity|olfactory receptor activity|	10	0.5	1.29	10	0.6	2.84	0.6	3.89	0.0993	-0.5	1.6	0	0	0
ENSG00000114023	FAM162A	family with sequence similarity 162, member A	nucleus|cytoplasm|mitochondrion|integral component of membrane|extracellular vesicular exosome|	activation of cysteine-type endopeptidase activity involved in apoptotic process|transformed cell apoptotic process|positive regulation of apoptotic process|neuron apoptotic process|cellular response to hypoxia|positive regulation of release of cytochrome c from mitochondria|	protein binding|	10	0.5	1.16	10	0.3	3.15	0.4	3.88	0.0997	-0.3	1.4	0	0	0
ENSG00000141219	C17ORF80	chromosome 17 open reading frame 80	integral component of membrane|extracellular vesicular exosome|	biological_process|	molecular_function|	10	-0.4	2.12	10	-0.3	2.15	-0.4	3.87	0.1	-1.5	0.7	0	0	0
ENSG00000040731	CDH10	cadherin 10, type 2 (T2-cadherin)	plasma membrane|integral component of membrane|	homophilic cell adhesion|single organismal cell-cell adhesion|cell junction assembly|adherens junction organization|cell-cell junction organization|	calcium ion binding|	10	-0.2	0.132	10	1.1	7.21	1	3.86	0.1	-0.6	2	0	0	0
ENSG00000226288	OR52I2	olfactory receptor, family 52, subfamily I, member 2	plasma membrane|integral component of membrane|	G-protein coupled receptor signaling pathway|detection of chemical stimulus involved in sensory perception of smell|	G-protein coupled receptor activity|olfactory receptor activity|	10	-0.2	0.178	10	-1.6	6.22	-1.6	3.86	0.1	-3	-0.1	0	0	0
ENSG00000197629	MPEG1	macrophage expressed 1	integral component of membrane|	None	None	10	-0.6	5.52	10	0.2	0.614	-0.4	3.85	0.101	-1.6	0.3	0	0	0
ENSG00000197233	OR1J2	olfactory receptor, family 1, subfamily J, member 2	plasma membrane|integral component of membrane|	G-protein coupled receptor signaling pathway|detection of chemical stimulus involved in sensory perception of smell|	G-protein coupled receptor activity|olfactory receptor activity|	10	-0.4	4.66	10	0	0	-0.4	3.82	0.102	-1.3	0.3	0	0	0
ENSG00000172260	NEGR1	neuronal growth regulator 1	plasma membrane|anchored component of membrane|extracellular vesicular exosome|	locomotory behavior|feeding behavior|positive regulation of neuron projection development|single organismal cell-cell adhesion|	protein binding|	10	-1.5	6.76	10	-0.1	0.203	-1.5	3.81	0.102	-3	-0.1	0	0	0
ENSG00000197263	OR8D2	olfactory receptor, family 8, subfamily D, member 2	plasma membrane|integral component of membrane|	G-protein coupled receptor signaling pathway|detection of chemical stimulus involved in sensory perception of smell|	G-protein coupled receptor activity|olfactory receptor activity|	10	-0.7	1.82	10	-0.3	2.77	-0.4	3.81	0.102	-1.6	0.3	0	0	0
ENSG00000048140	TSPAN17	tetraspanin 17	ubiquitin ligase complex|integral component of membrane|	protein ubiquitination|establishment of protein localization to organelle|	ubiquitin-protein transferase activity|enzyme binding|	10	-0.4	2.77	10	-0.7	1.44	-0.3	3.8	0.103	-1.5	0.2	0	0	0
ENSG00000139636	LMBR1L	limb development membrane protein 1-like	plasma membrane|integral component of membrane|	endocytosis|	None	10	-0.5	3.89	10	0.8	5.71	-1.6	3.8	0.103	-3	1.1	0	0	0
ENSG00000008282	SYPL1	synaptophysin-like 1	integral component of plasma membrane|integral component of membrane|secretory granule|integral component of synaptic vesicle membrane|cytoplasmic vesicle membrane|melanosome|extracellular vesicular exosome|	transport|synaptic transmission|	transporter activity|	10	-0.3	1.67	10	-1	4	-0.4	3.79	0.103	-1.8	0.1	0	0	0
ENSG00000189362	TMEM194B	transmembrane protein 194B	integral component of membrane|	None	None	10	0.5	0.93	10	0.3	3.53	0.3	3.79	0.103	-1.4	1.1	0	0	0
ENSG00000058804	NDC1	NDC1 transmembrane nucleoporin	nuclear pore|membrane|nuclear membrane|	protein transport|nuclear pore distribution|mRNA transport|nuclear pore complex assembly|	structural constituent of nuclear pore|	10	0.3	2.48	10	0.2	1.68	0.3	3.78	0.104	-0.9	1.1	0	0	0
ENSG00000116678	LEPR	leptin receptor	extracellular region|plasma membrane|integral component of membrane|receptor complex|	energy reserve metabolic process|cell surface receptor signaling pathway|multicellular organismal development|cholesterol metabolic process|cytokine-mediated signaling pathway|negative regulation of hydrolase activity|	transmembrane signaling receptor activity|cytokine receptor activity|protein binding|identical protein binding|	10	-0.3	1.97	10	1.1	6.97	1.1	3.78	0.104	-0.3	2	0	0	0
ENSG00000112414	GPR126	G protein-coupled receptor 126	plasma membrane|integral component of membrane|	G-protein coupled receptor signaling pathway|neuropeptide signaling pathway|	G-protein coupled receptor activity|	10	0	0	10	-0.7	6.03	-0.6	3.78	0.104	-1.8	0.3	0	0	0
ENSG00000115446	UNC50	unc-50 homolog (C. elegans)	Golgi membrane|nuclear inner membrane|integral component of membrane|	cell surface receptor signaling pathway|protein transport|	RNA binding|	10	-0.3	0.901	9	-1.4	5.48	-1.4	3.78	0.104	-3	0	0	0	0
ENSG00000167230	C17ORF78	chromosome 17 open reading frame 78	integral component of membrane|	None	None	10	0.2	1.25	10	-0.3	3.24	-0.3	3.76	0.104	-1.5	0.4	0	0	0
ENSG00000046604	DSG2	desmoglein 2	plasma membrane|plasma membrane|cell-cell junction|integral component of membrane|apical plasma membrane|lateral plasma membrane|desmosome|extracellular vesicular exosome|	apoptotic process|cellular component disassembly involved in execution phase of apoptosis|cell adhesion|homophilic cell adhesion|response to progesterone|maternal process involved in female pregnancy|ventricular cardiac muscle cell action potential|bundle of His cell to Purkinje myocyte communication|regulation of heart rate by cardiac conduction|	calcium ion binding|	10	0.3	2.73	10	0.3	1.24	0.3	3.74	0.105	-0.3	1.4	0	0	0
ENSG00000130303	BST2	bone marrow stromal cell antigen 2	cytoplasm|cytoplasm|late endosome|Golgi apparatus|plasma membrane|integral component of plasma membrane|cell surface|membrane|apical plasma membrane|anchored component of membrane|membrane raft|extracellular vesicular exosome|	negative regulation of plasmacytoid dendritic cell cytokine production|humoral immune response|signal transduction|cell-cell signaling|multicellular organismal development|cell proliferation|response to virus|negative regulation of endopeptidase activity|negative regulation of cell growth|negative regulation of cell migration|regulation of actin cytoskeleton organization|response to interferon-ga…	signal transducer activity|protein binding|metalloendopeptidase inhibitor activity|protein homodimerization activity|poly(A) RNA binding|	10	0.4	0.354	10	-1.3	6.07	-1.3	3.74	0.105	-2	0.2	0	0	0
ENSG00000122335	SERAC1	serine active site containing 1	nucleus|cytoplasm|mitochondrion|endoplasmic reticulum|integral component of membrane|extracellular matrix|	GPI anchor metabolic process|intracellular protein transport|phospholipid biosynthetic process|extracellular matrix organization|	hydrolase activity, acting on ester bonds|	10	0.4	3.35	10	-0.5	1.87	0.3	3.73	0.106	-1	1.2	0	0	0
ENSG00000198643	FAM3D	family with sequence similarity 3, member D	extracellular region|	negative regulation of insulin secretion|	cytokine activity|	10	1.1	2.55	10	0.4	3.24	0.5	3.73	0.106	-0.1	1.9	0	0	0
ENSG00000134760	DSG1	desmoglein 1	cytosol|plasma membrane|cell-cell junction|cytoplasmic side of plasma membrane|integral component of membrane|apical plasma membrane|lateral plasma membrane|desmosome|extracellular vesicular exosome|	apoptotic process|cellular component disassembly involved in execution phase of apoptosis|cell-cell junction assembly|homophilic cell adhesion|single organismal cell-cell adhesion|calcium-dependent cell-cell adhesion|response to progesterone|protein stabilization|maternal process involved in female pregnancy|	calcium ion binding|toxic substance binding|gamma-catenin binding|	10	-0.4	2.18	10	0.5	3.16	-0.3	3.72	0.106	-1.3	0.9	0	0	0
ENSG00000115307	AUP1	ancient ubiquitous protein 1	endoplasmic reticulum membrane|membrane|integral component of membrane|	None	protein binding|	10	-0.2	0.701	10	0.7	4.75	0.7	3.71	0.106	-1	1.8	0	0	0
ENSG00000232382	OR5K1	olfactory receptor, family 5, subfamily K, member 1	plasma membrane|integral component of membrane|	G-protein coupled receptor signaling pathway|detection of chemical stimulus involved in sensory perception of smell|	G-protein coupled receptor activity|olfactory receptor activity|	10	-0.4	2.43	10	-1.2	3.56	-0.6	3.71	0.106	-2	0.1	0	0	0
ENSG00000116014	KISS1R	KISS1 receptor	plasma membrane|cell surface|integral component of membrane|	activation of MAPKK activity|G-protein coupled receptor signaling pathway|neuropeptide signaling pathway|negative regulation of cell proliferation|calcium-mediated signaling|positive regulation of hormone secretion|arachidonic acid secretion|positive regulation of synaptic transmission|positive regulation of stress fiber assembly|	protein binding|neuropeptide receptor activity|neuropeptide binding|	10	0.4	4.72	10	0.1	0.403	0.3	3.71	0.106	-0.3	1.4	0	0	0
ENSG00000006652	IFRD1	interferon-related developmental regulator 1	nucleus|	multicellular organismal development|myoblast fate determination|adult somatic muscle development|	None	10	-0.3	4.39	10	-0.1	0.0922	-0.3	3.7	0.107	-1.2	0.4	0	0	0
ENSG00000150403	TMCO3	transmembrane and coiled-coil domains 3	integral component of membrane|	hydrogen ion transmembrane transport|	solute:proton antiporter activity|	10	-0.4	2.65	10	0.6	4.78	-0.3	3.69	0.107	-1	1.5	0	0	0
ENSG00000244187	TMEM141	transmembrane protein 141	integral component of membrane|	None	None	10	-0.5	4.25	10	-0.1	0.342	-0.3	3.69	0.107	-1.6	0.6	0	0	0
ENSG00000186806	VSIG10L	V-set and immunoglobulin domain containing 10 like	integral component of membrane|	None	None	10	-0.2	1.47	10	-0.6	3.51	-0.3	3.67	0.108	-1.3	0.2	0	0	0
ENSG00000065600	TMEM206	transmembrane protein 206	integral component of membrane|	None	None	10	-0.4	2.97	10	1.1	6.34	1.1	3.67	0.108	-0.6	2	0	0	0
ENSG00000188800	TMCO2	transmembrane and coiled-coil domains 2	nucleus|integral component of membrane|	None	None	10	-0.4	3.1	10	-1.2	2.36	-0.3	3.66	0.108	-1.9	0.2	0	0	0
ENSG00000181631	P2RY13	purinergic receptor P2Y, G-protein coupled, 13	endoplasmic reticulum|plasma membrane|integral component of membrane|	negative regulation of adenylate cyclase activity|biological_process|G-protein coupled purinergic nucleotide receptor signaling pathway|	G-protein coupled purinergic nucleotide receptor activity|	10	-0.6	2.78	10	-1.1	2.19	-0.8	3.66	0.108	-1.9	0	0	0	0
ENSG00000173578	XCR1	chemokine (C motif) receptor 1	plasma membrane|integral component of plasma membrane|	chemotaxis|inflammatory response|G-protein coupled receptor signaling pathway|G-protein coupled receptor signaling pathway, coupled to cyclic nucleotide second messenger|positive regulation of cytosolic calcium ion concentration|release of sequestered calcium ion into cytosol|chemokine-mediated signaling pathway|chemokine-mediated signaling pathway|	chemokine receptor activity|	10	1.2	6.89	10	-0.9	1.14	1.2	3.66	0.108	-0.8	2	0	0	0
ENSG00000250317	SMIM20	small integral membrane protein 20	integral component of membrane|	None	None	9	0	0	10	1.1	6.88	1.1	3.64	0.109	-1.5	2	0	0	0
ENSG00000182083	OR6B2	olfactory receptor, family 6, subfamily B, member 2	plasma membrane|integral component of membrane|	G-protein coupled receptor signaling pathway|detection of chemical stimulus involved in sensory perception of smell|	G-protein coupled receptor activity|olfactory receptor activity|	10	-0.6	1.19	10	-0.5	2.76	-0.5	3.63	0.11	-1.5	1.2	0	0	0
ENSG00000197991	PCDH20	protocadherin 20	plasma membrane|integral component of membrane|	homophilic cell adhesion|	calcium ion binding|poly(A) RNA binding|	10	-0.4	3.93	10	-0.2	0.37	-0.4	3.63	0.11	-1.4	0.4	0	0	0
ENSG00000185128	TBC1D3F	TBC1 domain family, member 3F	plasma membrane|	positive regulation of Rab GTPase activity|	Rab GTPase activator activity|	4	1	4.17	4	0.3	1.61	0.9	3.6	0.111	-0.3	2	0	0	0
ENSG00000262628	OR1D5	olfactory receptor, family 1, subfamily D, member 5	plasma membrane|integral component of membrane|	G-protein coupled receptor signaling pathway|sensory perception of smell|detection of chemical stimulus involved in sensory perception of smell|detection of chemical stimulus involved in sensory perception of smell|	G-protein coupled receptor activity|olfactory receptor activity|	10	0.6	2.24	10	0.8	1.63	0.7	3.6	0.111	-0.1	1.6	0	0	0
ENSG00000137038	TMEM261	transmembrane protein 261	integral component of membrane|	None	None	10	0.4	0.884	10	-0.3	4.22	-0.3	3.59	0.111	-1.2	0.8	0	0	0
ENSG00000197681	TBC1D3	TBC1 domain family, member 3	plasma membrane|	positive regulation of Rab GTPase activity|	Rab GTPase activator activity|	9	0.3	3.17	9	0.8	1.46	0.3	3.59	0.111	-0.5	1.6	0	0	0
ENSG00000171867	PRNP	prion protein	nucleus|cytoplasm|mitochondrial outer membrane|endoplasmic reticulum|Golgi apparatus|plasma membrane|integral component of membrane|extrinsic component of membrane|anchored component of membrane|membrane raft|extracellular vesicular exosome|	negative regulation of protein phosphorylation|cellular copper ion homeostasis|response to oxidative stress|cell cycle arrest|axon guidance|learning or memory|metabolic process|negative regulation of interferon-gamma production|negative regulation of interleukin-17 production|negative regulation of interleukin-2 production|negative regulation of apoptotic process|negative regulation of sequence-s…	copper ion binding|copper ion binding|protein binding|microtubule binding|tubulin binding|identical protein binding|ATP-dependent protein binding|chaperone binding|	10	0.7	5.2	10	0.2	0.417	0.6	3.58	0.112	-0.1	1.7	0	0	0
ENSG00000177363	LRRN4CL	LRRN4 C-terminal like	integral component of membrane|	None	None	10	-0.6	3.95	10	-0.3	0.377	-0.4	3.55	0.113	-1.6	0.3	0	0	0
ENSG00000188092	GPR89B	G protein-coupled receptor 89B	Golgi membrane|integral component of membrane|	ion transport|protein transport|regulation of ion transmembrane transport|	voltage-gated ion channel activity|	8	-0.5	5.41	8	0	0	-0.5	3.55	0.113	-1.6	0.2	0	0	0
ENSG00000166091	CMTM5	CKLF-like MARVEL transmembrane domain containing 5	extracellular space|integral component of membrane|	chemotaxis|	cytokine activity|	10	0.4	1.49	10	0.5	2.3	0.4	3.55	0.113	-0.9	1.5	0	0	0
ENSG00000167191	GPRC5B	G protein-coupled receptor, class C, group 5, member B	extracellular space|nucleus|nucleolus|plasma membrane|cell surface|integral component of membrane|cytoplasmic vesicle membrane|intracellular membrane-bounded organelle|extracellular vesicular exosome|	G-protein coupled receptor signaling pathway|locomotory behavior|positive regulation of neuron projection development|positive regulation of I-kappaB kinase/NF-kappaB signaling|positive regulation of neuron differentiation|positive regulation of inflammatory response|positive regulation of macrophage cytokine production|positive regulation of protein tyrosine kinase activity|positive regulation o…	G-protein coupled receptor binding|G-protein coupled receptor activity|protein kinase binding|protein kinase activator activity|	10	-0.4	4.43	10	-0.1	0.261	-0.4	3.54	0.114	-1.4	0.7	0	0	0
ENSG00000050130	JKAMP	JNK1/MAPK8-associated membrane protein	endoplasmic reticulum membrane|integral component of membrane|	response to unfolded protein|ER-associated ubiquitin-dependent protein catabolic process|	ubiquitin protein ligase binding|	9	0.6	3.32	10	-0.3	2.34	0.4	3.53	0.114	-0.8	1.5	0	0	0
ENSG00000149295	DRD2	dopamine receptor D2	acrosomal vesicle|plasma membrane|integral component of plasma membrane|integral component of plasma membrane|postsynaptic density|lateral plasma membrane|endocytic vesicle|axon|dendrite|synaptic vesicle membrane|sperm flagellum|dendritic spine|perikaryon|axon terminus|	temperature homeostasis|response to hypoxia|synaptic transmission, dopaminergic|response to amphetamine|neurological system process involved in regulation of systemic arterial blood pressure|regulation of heart rate|regulation of sodium ion transport|G-protein coupled receptor internalization|positive regulation of neuroblast proliferation|positive regulation of receptor internalization|cellular …	dopamine neurotransmitter receptor activity, coupled via Gi/Go|protein binding|drug binding|potassium channel regulator activity|dopamine binding|ionotropic glutamate receptor binding|identical protein binding|protein homodimerization activity|protein heterodimerization activity|	10	-0.1	0.173	10	-0.4	4.33	-0.4	3.52	0.115	-1.3	0.4	0	0	0
ENSG00000165120	SSMEM1	serine-rich single-pass membrane protein 1	integral component of membrane|	None	None	10	-0.1	0.0673	10	-0.5	5.12	-0.4	3.52	0.115	-1.3	0.3	0	0	0
ENSG00000134817	APLNR	apelin receptor	plasma membrane|integral component of plasma membrane|	G-protein coupled receptor signaling pathway|gastrulation|heart development|regulation of body fluid levels|	receptor activity|G-protein coupled receptor activity|	10	0.3	1.35	10	-0.5	5.85	-0.4	3.51	0.115	-1.4	0.7	0	0	0
ENSG00000125841	NRSN2	neurensin 2	plasma membrane|integral component of membrane|transport vesicle|neuronal cell body|	biological_process|	molecular_function|	10	-0.6	5.39	10	-0.1	0.292	-0.4	3.49	0.116	-1.7	0.1	0	0	0
ENSG00000253537	PCDHGA7	protocadherin gamma subfamily A, 7	plasma membrane|integral component of membrane|	homophilic cell adhesion|	calcium ion binding|	5	1	4.68	5	0.3	0.963	1	3.48	0.116	-0.3	2	0	0	0
ENSG00000163646	CLRN1	clarin 1	plasma membrane|microvillus|integral component of membrane|lamellipodium|	actin filament organization|visual perception|sensory perception of sound|positive regulation of lamellipodium assembly|photoreceptor cell maintenance|cell motility|response to stimulus|sensory perception of light stimulus|equilibrioception|	None	7	-0.2	0.808	7	-0.4	3.08	-0.3	3.48	0.116	-1.7	0.3	0	0	0
ENSG00000169490	TM2D2	TM2 domain containing 2	integral component of membrane|	None	None	10	-0.4	3.92	10	-0.1	0.251	-0.3	3.47	0.117	-1.4	0.7	0	0	0
ENSG00000096264	NCR2	natural cytotoxicity triggering receptor 2	plasma membrane|integral component of plasma membrane|	cellular defense response|signal transduction|innate immune response|	transmembrane signaling receptor activity|	10	-0.7	2.12	10	-0.3	1.63	-0.4	3.47	0.117	-1.6	0.4	0	0	0
ENSG00000002933	TMEM176A	transmembrane protein 176A	integral component of membrane|	negative regulation of dendritic cell differentiation|	None	10	-0.1	0.221	10	0.3	4.21	0.3	3.47	0.117	-0.8	1.3	0	0	0
ENSG00000180658	OR2A4	olfactory receptor, family 2, subfamily A, member 4	plasma membrane|integral component of membrane|cleavage furrow|recycling endosome|Flemming body|mitotic spindle pole|mitotic spindle midzone|	G-protein coupled receptor signaling pathway|positive regulation of cytokinesis|regulation of actin cytoskeleton organization|detection of chemical stimulus involved in sensory perception of smell|	molecular_function|G-protein coupled receptor activity|olfactory receptor activity|	10	0.6	2.76	10	0.3	2.15	0.3	3.44	0.118	-1.4	1.4	0	0	0
ENSG00000175393	OR10A6	olfactory receptor, family 10, subfamily A, member 6	plasma membrane|integral component of membrane|	G-protein coupled receptor signaling pathway|detection of chemical stimulus involved in sensory perception of smell|	G-protein coupled receptor activity|olfactory receptor activity|	10	-0.3	2.52	10	0.3	2.2	-0.3	3.44	0.118	-1.1	1.1	0	0	0
ENSG00000132563	REEP2	receptor accessory protein 2	endoplasmic reticulum|cytoplasmic microtubule|integral component of plasma membrane|extracellular vesicular exosome|	cell death|protein transport into membrane raft|sensory perception of bitter taste|sensory perception of sweet taste|endoplasmic reticulum tubular network organization|	taste receptor binding|	10	0.3	1.21	10	-0.8	3.59	-0.9	3.43	0.119	-1.9	0.5	0	0	0
ENSG00000174871	CNIH2	cornichon family AMPA receptor auxiliary protein 2	endoplasmic reticulum membrane|postsynaptic density|cell junction|dendrite|alpha-amino-3-hydroxy-5-methyl-4-isoxazolepropionic acid selective glutamate receptor complex|dendritic spine|dendritic shaft|postsynaptic membrane|	synaptic transmission, glutamatergic|intracellular signal transduction|regulation of membrane potential|localization within membrane|regulation of alpha-amino-3-hydroxy-5-methyl-4-isoxazole propionate selective glutamate receptor activity|	protein binding|	10	0.3	1.7	10	0.3	1.95	0.3	3.43	0.119	-0.6	1.3	0	0	0
ENSG00000171094	ALK	anaplastic lymphoma receptor tyrosine kinase	integral component of plasma membrane|integral component of plasma membrane|protein complex|extracellular vesicular exosome|	activation of MAPK activity|signal transduction|transmembrane receptor protein tyrosine kinase signaling pathway|cell proliferation|phosphorylation|phosphorylation|peptidyl-tyrosine phosphorylation|peptidyl-tyrosine phosphorylation|peptidyl-tyrosine phosphorylation|NIK/NF-kappaB signaling|regulation of apoptotic process|protein autophosphorylation|protein autophosphorylation|neuron development|po…	NF-kappaB-inducing kinase activity|protein tyrosine kinase activity|transmembrane receptor protein tyrosine kinase activity|transmembrane receptor protein tyrosine kinase activity|protein binding|ATP binding|	10	-0.2	1.41	10	-0.3	2.54	-0.3	3.43	0.119	-1.2	0.4	0	0	0
ENSG00000145147	SLIT2	slit homolog 2 (Drosophila)	extracellular region|extracellular space|cytoplasm|plasma membrane|cell surface|membrane|extracellular vesicular exosome|	metanephros development|ureteric bud development|in utero embryonic development|negative regulation of protein phosphorylation|cell migration involved in sprouting angiogenesis|negative regulation of leukocyte chemotaxis|axon guidance|axon guidance|motor neuron axon guidance|negative regulation of cell proliferation|negative regulation of lamellipodium assembly|negative regulation of endothelial …	GTPase inhibitor activity|calcium ion binding|protein binding|heparin binding|identical protein binding|protein homodimerization activity|laminin-1 binding|proteoglycan binding|chemorepellent activity|Roundabout binding|	10	0.1	0.149	10	0.9	5.4	0.5	3.42	0.119	0	1.9	0	0	0
ENSG00000099785	2020-03-02	membrane-associated ring finger (C3HC4) 2, E3 ubiquitin protein ligase	lysosomal membrane|endoplasmic reticulum|endoplasmic reticulum membrane|endosome membrane|integral component of membrane|cytoplasmic vesicle|	endocytosis|protein ubiquitination|protein ubiquitination|	ubiquitin-protein transferase activity|zinc ion binding|ligase activity|	10	-0.3	2.97	10	-0.2	0.671	-0.3	3.42	0.119	-1.1	1.2	0	0	0
ENSG00000165678	GHITM	growth hormone inducible transmembrane protein	mitochondrial inner membrane|integral component of membrane|extracellular vesicular exosome|	apoptotic process|biological_process|	molecular_function|protein binding|	10	0	0	10	-0.4	3.78	-0.3	3.4	0.12	-1.2	0.3	0	0	0
ENSG00000186113	OR5D14	olfactory receptor, family 5, subfamily D, member 14	plasma membrane|integral component of membrane|	G-protein coupled receptor signaling pathway|detection of chemical stimulus involved in sensory perception of smell|	G-protein coupled receptor activity|olfactory receptor activity|	10	-0.8	4.53	10	-0.2	0.793	-0.7	3.4	0.12	-1.8	0.1	0	0	0
ENSG00000197591	OR11L1	olfactory receptor, family 11, subfamily L, member 1	plasma membrane|integral component of membrane|extracellular vesicular exosome|	G-protein coupled receptor signaling pathway|biological_process|detection of chemical stimulus involved in sensory perception of smell|	molecular_function|G-protein coupled receptor activity|olfactory receptor activity|	10	-0.4	5	10	0.1	0.981	-0.4	3.4	0.12	-1.5	0.3	0	0	0
ENSG00000205639	MFSD2B	major facilitator superfamily domain containing 2B	integral component of membrane|	transport|	None	10	-0.3	1.23	10	-0.4	2.46	-0.3	3.39	0.121	-1.2	1.2	0	0	0
ENSG00000124225	PMEPA1	prostate transmembrane protein, androgen induced 1	plasma membrane|integral component of membrane|early endosome membrane|	transforming growth factor beta receptor signaling pathway|negative regulation of transforming growth factor beta receptor signaling pathway|androgen receptor signaling pathway|	WW domain binding|	10	0.5	4.85	10	-0.2	0.276	0.5	3.39	0.121	-0.5	1.6	0	0	0
ENSG00000204278	TMEM235	transmembrane protein 235	endoplasmic reticulum|tight junction|integral component of membrane|apical plasma membrane|	None	structural molecule activity|	10	0.1	0.0456	10	0.5	4.14	0.4	3.38	0.121	-0.3	1.5	0	0	0
ENSG00000163600	ICOS	inducible T-cell co-stimulator	extracellular region|plasma membrane|integral component of plasma membrane|external side of plasma membrane|	T cell tolerance induction|immune response|single organismal cell-cell adhesion|T cell costimulation|	None	10	0.7	5.79	10	0	0	0.7	3.38	0.121	-0.8	1.8	0	0	0
ENSG00000175877	WBSCR28	Williams-Beuren syndrome chromosome region 28	integral component of membrane|	None	None	10	-0.5	1.34	10	-0.4	2.32	-0.5	3.38	0.121	-1.6	0.2	0	0	0
ENSG00000185070	FLRT2	fibronectin leucine rich transmembrane protein 2	proteinaceous extracellular matrix|integral component of plasma membrane|extracellular vesicular exosome|	cell adhesion|biological_process|intracellular signal transduction|	receptor signaling protein activity|protein binding, bridging|	9	-0.8	6.41	9	0.1	0.27	-0.8	3.36	0.122	-1.9	0.1	0	0	0
ENSG00000170310	STX8	syntaxin 8	lysosomal membrane|endoplasmic reticulum|integral component of plasma membrane|SNARE complex|late endosome membrane|	transport|intracellular protein transport|vesicle fusion|endosome to lysosome transport|	SNAP receptor activity|ubiquitin protein ligase binding|	10	1.1	6.66	10	-1.4	3.69	1.1	3.35	0.123	-1.6	2	0	0	0
ENSG00000124222	STX16	syntaxin 16	Golgi membrane|nucleolus|cytoplasm|Golgi apparatus|integral component of membrane|SNARE complex|SNARE complex|intracellular membrane-bounded organelle|	intracellular protein transport|intra-Golgi vesicle-mediated transport|retrograde transport, endosome to Golgi|	SNAP receptor activity|protein binding|	10	0	0	10	-1.3	6.62	-1.3	3.34	0.123	-2	0	0	0	0
ENSG00000214046	SMIM7	small integral membrane protein 7	integral component of membrane|	None	None	1	0.1	0.087	1	-0.8	4.1	-0.8	3.34	0.123	-2	1.2	0	0	0
ENSG00000106018	VIPR2	vasoactive intestinal peptide receptor 2	plasma membrane|integral component of plasma membrane|	signal transduction|G-protein coupled receptor signaling pathway|activation of adenylate cyclase activity|cell-cell signaling|negative regulation of smooth muscle cell proliferation|	G-protein coupled receptor activity|vasoactive intestinal polypeptide receptor activity|	10	-0.3	2.88	10	-0.3	0.663	-0.3	3.34	0.123	-1.3	0.7	0	0	0
ENSG00000163608	C3ORF17	chromosome 3 open reading frame 17	integral component of membrane|	None	None	10	0.9	3.52	10	-0.9	4.96	-0.7	3.33	0.124	-1.9	1.4	0	0	0
ENSG00000145685	LHFPL2	lipoma HMGIC fusion partner-like 2	cellular_component|integral component of membrane|	biological_process|	molecular_function|	10	1.1	2.73	10	-0.4	0.99	-0.4	3.32	0.124	-1.1	1.8	0	0	0
ENSG00000250232	AF196779.12	N/A	None	None	None	6	0.5	3.77	6	0.2	0.777	0.3	3.32	0.124	-0.5	1.8	0	0	0
ENSG00000205327	OR6C68	olfactory receptor, family 6, subfamily C, member 68	plasma membrane|integral component of membrane|	G-protein coupled receptor signaling pathway|detection of chemical stimulus involved in sensory perception of smell|	G-protein coupled receptor activity|olfactory receptor activity|	10	-0.1	0.326	10	-0.4	3.56	-0.4	3.32	0.124	-1.5	0.4	0	0	0
ENSG00000109133	TMEM33	transmembrane protein 33	integral component of membrane|melanosome|extracellular vesicular exosome|	biological_process|	None	10	1.1	4.74	10	0.2	0.517	0.2	3.29	0.126	0	1.9	0	0	0
ENSG00000174946	GPR171	G protein-coupled receptor 171	plasma membrane|integral component of membrane|	G-protein coupled receptor signaling pathway|	G-protein coupled receptor activity|	10	-0.5	4.7	10	-0.1	0.119	-0.4	3.28	0.126	-1.4	0.5	0	0	0
ENSG00000203757	OR6K3	olfactory receptor, family 6, subfamily K, member 3	plasma membrane|integral component of membrane|	G-protein coupled receptor signaling pathway|detection of chemical stimulus involved in sensory perception of smell|	G-protein coupled receptor activity|olfactory receptor activity|	10	-0.4	1.65	10	-0.3	1.92	-0.4	3.28	0.126	-1.5	0.8	0	0	0
ENSG00000140749	IGSF6	immunoglobulin superfamily, member 6	integral component of plasma membrane|	immune response|cell surface receptor signaling pathway|	transmembrane signaling receptor activity|	10	-0.4	1.9	10	-0.9	2.21	-0.4	3.28	0.126	-1.7	0.1	0	0	0
ENSG00000174109	C16ORF91	chromosome 16 open reading frame 91	integral component of membrane|	None	None	10	0	0	10	0.3	3.78	0.3	3.27	0.127	-0.5	1.3	0	0	0
ENSG00000196131	VN1R2	vomeronasal 1 receptor 2	plasma membrane|integral component of membrane|	G-protein coupled receptor signaling pathway|response to pheromone|	pheromone receptor activity|	10	0.2	0.89	10	0.2	2.57	0.2	3.26	0.127	-1.8	0.7	0	0	0
ENSG00000204956	PCDHGA1	protocadherin gamma subfamily A, 1	plasma membrane|integral component of membrane|	homophilic cell adhesion|	calcium ion binding|	10	-0.4	3.04	10	-0.4	0.409	-0.4	3.26	0.127	-1.5	0.2	0	0	0
ENSG00000146433	TMEM181	transmembrane protein 181	integral component of membrane|	pathogenesis|	toxic substance binding|	10	-0.6	1.09	10	-0.4	2.59	-0.5	3.25	0.128	-1.5	1.2	0	0	0
ENSG00000258986	TMEM179	transmembrane protein 179	integral component of membrane|	None	None	10	0.9	1.43	10	-0.4	2.52	-0.4	3.25	0.128	-1.4	1.4	0	0	0
ENSG00000221938	OR2A14	olfactory receptor, family 2, subfamily A, member 14	plasma membrane|integral component of membrane|	G-protein coupled receptor signaling pathway|detection of chemical stimulus involved in sensory perception of smell|	G-protein coupled receptor activity|olfactory receptor activity|	10	-0.5	3.2	10	-1.2	3.06	-0.6	3.24	0.128	-1.9	0.3	0	0	0
ENSG00000109680	TBC1D19	TBC1 domain family, member 19	None	positive regulation of Rab GTPase activity|	Rab GTPase activator activity|	10	-0.8	2.39	10	-0.4	1.31	-0.5	3.24	0.128	-1.6	0.5	0	0	0
ENSG00000111863	ADTRP	androgen-dependent TFPI-regulating protein	plasma membrane|integral component of membrane|	None	None	10	-0.2	1.31	10	1	5.14	-0.3	3.24	0.128	-0.6	2	0	0	0
ENSG00000198663	C6ORF89	chromosome 6 open reading frame 89	Golgi membrane|nucleolus|cytoplasm|plasma membrane|integral component of membrane|midbody|	wound healing|positive regulation of cell cycle|epithelial cell proliferation|	None	10	-0.6	4.33	10	-0.1	0.845	-0.5	3.24	0.128	-1.6	0.1	0	0	0
ENSG00000185149	NPY2R	neuropeptide Y receptor Y2	plasma membrane|integral component of plasma membrane|	behavioral fear response|positive regulation of peptide secretion|outflow tract morphogenesis|cardiac left ventricle morphogenesis|adenylate cyclase-inhibiting G-protein coupled receptor signaling pathway|positive regulation of cytosolic calcium ion concentration|neuropeptide signaling pathway|neuropeptide signaling pathway|nitric oxide mediated signal transduction|locomotory behavior|negative re…	peptide YY receptor activity|receptor activity|neuropeptide Y receptor activity|calcium channel regulator activity|protein binding|	10	0.6	1.43	10	1.4	4.09	1.3	3.23	0.129	-1	2	0	0	0
ENSG00000149932	TMEM219	transmembrane protein 219	plasma membrane|integral component of membrane|	apoptotic process|	None	10	-0.3	1.85	10	0.6	2.25	0.5	3.22	0.129	-1.1	1.6	0	0	0
ENSG00000109099	PMP22	peripheral myelin protein 22	plasma membrane|tight junction|integral component of membrane|compact myelin|	synaptic transmission|peripheral nervous system development|cell death|negative regulation of cell proliferation|negative regulation of neuron projection development|myelin assembly|	protein binding|	10	-0.7	3.24	10	-0.3	1.22	-0.5	3.22	0.129	-1.6	0.1	0	0	0
ENSG00000177990	DPY19L2	dpy-19-like 2 (C. elegans)	nucleus|integral component of membrane|	multicellular organismal development|spermatid development|metabolic process|	transferase activity, transferring glycosyl groups|	10	-0.1	0.369	10	-0.4	3.54	-0.2	3.22	0.129	-1.4	1.1	0	0	0
ENSG00000128519	TAS2R16	taste receptor, type 2, member 16	endoplasmic reticulum|trans-Golgi network|plasma membrane|external side of plasma membrane|integral component of membrane|	detection of chemical stimulus involved in sensory perception of bitter taste|G-protein coupled receptor signaling pathway|	protein binding|bitter taste receptor activity|	10	-0.5	2.56	10	-0.8	1.21	-0.4	3.22	0.129	-1.7	0.1	0	0	0
ENSG00000134970	TMED7	transmembrane emp24 protein transport domain containing 7	endoplasmic reticulum|endoplasmic reticulum membrane|endoplasmic reticulum-Golgi intermediate compartment|Golgi apparatus|integral component of membrane|COPI vesicle coat|COPII vesicle coat|endoplasmic reticulum-Golgi intermediate compartment membrane|extracellular vesicular exosome|	protein transport|	None	7	-0.6	2.11	7	-0.3	1.51	-0.3	3.22	0.129	-1.8	0.4	0	0	0
ENSG00000256436	TAS2R31	taste receptor, type 2, member 31	plasma membrane|integral component of membrane|	detection of chemical stimulus involved in sensory perception of bitter taste|G-protein coupled receptor signaling pathway|	bitter taste receptor activity|	10	0.6	5.33	10	-1	1.12	0.5	3.21	0.13	-1.4	1.6	0	0	0
ENSG00000221888	OR1C1	olfactory receptor, family 1, subfamily C, member 1	plasma membrane|integral component of membrane|	G-protein coupled receptor signaling pathway|sensory perception of smell|detection of chemical stimulus involved in sensory perception of smell|detection of chemical stimulus involved in sensory perception of smell|	G-protein coupled receptor activity|olfactory receptor activity|	10	0.3	3.45	10	0.1	0.502	0.2	3.2	0.13	-0.5	1.7	0	0	0
ENSG00000177576	C18ORF32	chromosome 18 open reading frame 32	None	signal transduction|positive regulation of I-kappaB kinase/NF-kappaB signaling|	signal transducer activity|	2	0	0	2	0.8	4.45	0.8	3.19	0.131	-1.3	2	0	0	0
ENSG00000187783	TMEM72	transmembrane protein 72	integral component of membrane|	None	None	10	-0.8	5.46	10	0.1	0.2	-0.7	3.18	0.132	-1.8	0.3	0	0	0
ENSG00000231861	OR5K2	olfactory receptor, family 5, subfamily K, member 2	plasma membrane|integral component of membrane|	G-protein coupled receptor signaling pathway|detection of chemical stimulus involved in sensory perception of smell|	G-protein coupled receptor activity|olfactory receptor activity|	10	-0.5	5.57	10	0.4	3.24	-0.4	3.18	0.132	-1.3	0.9	0	0	0
ENSG00000244693	CTAGE8	CTAGE family, member 8	integral component of membrane|	None	None	7	-0.4	0.505	7	-0.5	2.88	-0.5	3.17	0.132	-1.8	0.4	0	0	0
ENSG00000116685	KIAA2013	KIAA2013	membrane|integral component of membrane|	None	None	10	-0.2	1.95	10	-0.2	1.44	-0.2	3.17	0.132	-1.5	0.4	0	0	0
ENSG00000138085	ATRAID	all-trans retinoic acid-induced differentiation factor	nuclear envelope|plasma membrane|integral component of membrane|perinuclear region of cytoplasm|	regulation of gene expression|cell differentiation|positive regulation of bone mineralization|negative regulation of osteoblast proliferation|positive regulation of osteoblast differentiation|negative regulation of cyclin catabolic process|	molecular_function|protein binding|	10	0.1	0.0614	10	0.4	3.92	0.3	3.17	0.132	-0.4	1.7	0	0	0
ENSG00000105983	LMBR1	limb development membrane protein 1	integral component of membrane|	embryonic digit morphogenesis|	None	10	-1.7	6.01	10	-0.1	0.0922	-1.7	3.17	0.132	-3	0	0	0	0
ENSG00000217555	CKLF	chemokine-like factor	extracellular region|extracellular space|membrane|integral component of membrane|	cell proliferation|neutrophil chemotaxis|secretion by cell|macrophage chemotaxis|lymphocyte chemotaxis|	chemokine activity|	10	0.4	4.83	10	0	0	0.3	3.17	0.132	-0.2	1.4	0	0	0
ENSG00000165810	BTNL9	butyrophilin-like 9	integral component of membrane|	None	None	10	0.3	4.4	10	0	0	0.3	3.16	0.133	-0.3	1.3	0	0	0
ENSG00000147381	MAGEA4	melanoma antigen family A, 4	cellular_component|	biological_process|	molecular_function|protein binding|	10	-0.5	2.62	10	0.3	1.72	-0.6	3.16	0.133	-1.6	0.5	0	0	0
ENSG00000259207	ITGB3	integrin, beta 3 (platelet glycoprotein IIIa, antigen CD61)	nucleus|plasma membrane|plasma membrane|integral component of plasma membrane|focal adhesion|integrin complex|cell surface|platelet alpha granule membrane|lamellipodium membrane|melanosome|receptor complex|extracellular vesicular exosome|alphav-beta3 integrin-vitronectin complex|	positive regulation of protein phosphorylation|positive regulation of endothelial cell proliferation|platelet degranulation|protein folding|cell-substrate junction assembly|cell adhesion|cell-matrix adhesion|integrin-mediated signaling pathway|axon guidance|blood coagulation|positive regulation of endothelial cell migration|negative regulation of macrophage derived foam cell differentiation|negat…	protein disulfide isomerase activity|receptor activity|platelet-derived growth factor receptor binding|protein binding|identical protein binding|vascular endothelial growth factor receptor 2 binding|vascular endothelial growth factor receptor 2 binding|cell adhesion molecule binding|	10	-0.3	2.01	10	-0.2	1.41	-0.3	3.16	0.133	-1.1	1.2	0	0	0
ENSG00000170464	DNAJC18	DnaJ (Hsp40) homolog, subfamily C, member 18	integral component of membrane|	None	None	10	-0.6	4.38	9	0.1	0.283	-0.4	3.16	0.133	-1.7	0.3	0	0	0
ENSG00000162976	PQLC3	PQ loop repeat containing 3	integral component of membrane|	None	None	10	-0.3	2.56	10	-0.8	0.878	-0.3	3.15	0.134	-1.6	1	0	0	0
ENSG00000181826	RELL1	RELT-like 1	cytoplasm|plasma membrane|microtubule cytoskeleton|integral component of membrane|	None	None	10	-0.2	0.399	10	-0.4	3.09	-0.2	3.13	0.135	-1.3	0.4	0	0	0
ENSG00000178033	FAM26E	family with sequence similarity 26, member E	integral component of membrane|extracellular vesicular exosome|	ion transport|	None	10	-0.1	0.162	10	-1	5.19	-0.5	3.13	0.135	-1.8	0.3	0	0	0
ENSG00000181733	OR2Z1	olfactory receptor, family 2, subfamily Z, member 1	plasma membrane|integral component of membrane|	G-protein coupled receptor signaling pathway|detection of chemical stimulus involved in sensory perception of smell|	G-protein coupled receptor activity|olfactory receptor activity|	10	0.2	0.836	10	-0.4	5.02	-0.3	3.11	0.136	-1.2	0.9	0	0	0
ENSG00000162736	NCSTN	nicastrin	lysosomal membrane|endoplasmic reticulum|endoplasmic reticulum|Golgi apparatus|Golgi apparatus|plasma membrane|integral component of plasma membrane|integral component of plasma membrane|membrane|integral component of membrane|melanosome|extracellular vesicular exosome|	myeloid cell homeostasis|proteolysis|membrane protein ectodomain proteolysis|membrane protein ectodomain proteolysis|Notch signaling pathway|Notch receptor processing|protein processing|protein processing|extracellular matrix disassembly|extracellular matrix organization|membrane protein intracellular domain proteolysis|T cell proliferation|amyloid precursor protein catabolic process|positive reg…	endopeptidase activity|protein binding|	10	-0.2	0.719	10	-0.4	3.16	-0.3	3.11	0.136	-1.2	1.1	0	0	0
ENSG00000121764	HCRTR1	hypocretin (orexin) receptor 1	plasma membrane|integral component of plasma membrane|	neuropeptide signaling pathway|synaptic transmission|feeding behavior|	G-protein coupled receptor activity|orexin receptor activity|peptide hormone binding|	9	-0.6	1.28	9	0.6	3.45	0.7	3.11	0.136	-0.9	1.8	0	0	0
ENSG00000105369	CD79A	CD79a molecule, immunoglobulin-associated alpha	multivesicular body|plasma membrane|external side of plasma membrane|integral component of membrane|B cell receptor complex|membrane raft|	B cell differentiation|B cell proliferation|B cell activation|B cell receptor signaling pathway|	transmembrane signaling receptor activity|	10	-1.8	6.54	10	1.3	3.62	-1.8	3.1	0.136	-3	1.5	0	0	0
ENSG00000105778	AVL9	AVL9 homolog (S. cerevisiase)	integral component of membrane|recycling endosome|	cell migration|	None	10	-0.1	0.139	10	-0.5	3.92	-0.5	3.1	0.136	-1.5	0.3	0	0	0
ENSG00000163762	TM4SF18	transmembrane 4 L six family member 18	integral component of membrane|	None	None	10	-0.4	4.34	10	-0.1	0.0184	-0.3	3.1	0.136	-1.1	1.5	0	0	0
ENSG00000164220	F2RL2	coagulation factor II (thrombin) receptor-like 2	extracellular region|plasma membrane|integral component of plasma membrane|apical plasma membrane|	blood coagulation|metabolic process|response to wounding|platelet activation|thrombin receptor signaling pathway|	phosphatidylinositol phospholipase C activity|protein binding|thrombin receptor activity|	10	-0.7	1.94	10	1	4.8	1	3.09	0.137	-0.8	2	0	0	0
ENSG00000121895	TMEM156	transmembrane protein 156	integral component of membrane|	None	None	10	0.3	0.699	10	0.3	2.59	0.3	3.09	0.137	-1.7	0.9	0	0	0
ENSG00000196341	OR8D1	olfactory receptor, family 8, subfamily D, member 1	plasma membrane|integral component of membrane|	G-protein coupled receptor signaling pathway|detection of chemical stimulus involved in sensory perception of smell|	G-protein coupled receptor activity|olfactory receptor activity|	10	-0.2	1.76	10	-0.3	1.62	-0.3	3.08	0.138	-1.2	0.9	0	0	0
ENSG00000168936	TMEM129	transmembrane protein 129, E3 ubiquitin protein ligase	cellular_component|integral component of membrane|	biological_process|	molecular_function|	10	0.2	0.25	10	0.3	3.23	0.3	3.08	0.138	-1.8	0.9	0	0	0
ENSG00000215644	GCGR	glucagon receptor	endosome|plasma membrane|integral component of plasma membrane|integral component of membrane|	generation of precursor metabolites and energy|energy reserve metabolic process|exocytosis|adenylate cyclase-modulating G-protein coupled receptor signaling pathway|adenylate cyclase-activating G-protein coupled receptor signaling pathway|response to nutrient|regulation of blood pressure|hormone-mediated signaling pathway|glucose homeostasis|response to starvation|positive regulation of GTPase ac…	glucagon receptor activity|guanyl-nucleotide exchange factor activity|peptide hormone binding|	10	0	0	10	-1.3	6.38	-1.3	3.08	0.138	-2	0	0	0	0
ENSG00000174982	OR4S2	olfactory receptor, family 4, subfamily S, member 2	plasma membrane|integral component of membrane|	G-protein coupled receptor signaling pathway|detection of chemical stimulus involved in sensory perception of smell|	G-protein coupled receptor activity|olfactory receptor activity|	10	0.6	1.17	10	-0.7	4.16	-0.6	3.07	0.138	-1.6	0.9	0	0	0
ENSG00000255837	TAS2R20	taste receptor, type 2, member 20	plasma membrane|integral component of membrane|	G-protein coupled receptor signaling pathway|sensory perception of taste|	G-protein coupled receptor activity|	10	-0.3	3.12	10	-0.2	0.347	-0.3	3.06	0.139	-0.9	1.8	0	0	0
ENSG00000144445	KANSL1L	KAT8 regulatory NSL complex subunit 1-like	histone acetyltransferase complex|	None	None	10	-0.2	1.69	9	0.9	3.79	0.9	3.06	0.139	-0.6	2	0	0	0
ENSG00000181698	OR5T1	olfactory receptor, family 5, subfamily T, member 1	plasma membrane|integral component of membrane|	G-protein coupled receptor signaling pathway|detection of chemical stimulus involved in sensory perception of smell|	G-protein coupled receptor activity|olfactory receptor activity|	10	0.5	1.64	10	-0.7	5.22	-0.6	3.06	0.139	-1.8	0.7	0	0	0
ENSG00000161944	ASGR2	asialoglycoprotein receptor 2	integral component of membrane|	receptor-mediated endocytosis|cell surface receptor signaling pathway|glycoprotein metabolic process|bone mineralization|regulation of protein stability|lipid homeostasis|	asialoglycoprotein receptor activity|protein binding|carbohydrate binding|	10	0.3	1.5	10	0.4	2.02	0.3	3.05	0.139	-1.1	1.2	0	0	0
ENSG00000101928	MOSPD1	motile sperm domain containing 1	nucleus|cytoplasm|integral component of membrane|perinuclear region of cytoplasm|	negative regulation of transcription from RNA polymerase II promoter|positive regulation of transcription from RNA polymerase II promoter|	structural molecule activity|	10	-1	1	10	-1.1	2.35	-1	3.05	0.139	-2	0	0	0	0
ENSG00000177728	KIAA0195	KIAA0195	nucleus|integral component of membrane|	None	None	10	0.7	6.02	10	0	0	0.7	3.05	0.139	-0.4	1.8	0	0	0
ENSG00000181939	OR4C15	olfactory receptor, family 4, subfamily C, member 15	plasma membrane|integral component of membrane|	G-protein coupled receptor signaling pathway|detection of chemical stimulus involved in sensory perception of smell|	G-protein coupled receptor activity|olfactory receptor activity|	10	-0.1	0.175	10	-0.3	3.45	-0.2	3.04	0.14	-1.2	0.9	0	0	0
ENSG00000183762	KREMEN1	kringle containing transmembrane protein 1	membrane|integral component of membrane|	cell communication|Wnt signaling pathway|regulation of canonical Wnt signaling pathway|	protein binding|	10	-0.5	2.33	10	-0.2	1.36	-0.3	3.03	0.14	-1.4	0.3	0	0	0
ENSG00000120436	GPR31	G protein-coupled receptor 31	plasma membrane|integral component of plasma membrane|	G-protein coupled receptor signaling pathway|	G-protein coupled receptor activity|	10	0.2	0.744	10	0.2	2.48	0.2	3.03	0.14	-0.7	1.2	0	0	0
ENSG00000166086	JAM3	junctional adhesion molecule 3	extracellular space|plasma membrane|tight junction|integral component of membrane|desmosome|paranodal junction|Schmidt-Lanterman incisure|cell-cell contact zone|	angiogenesis|neutrophil homeostasis|adaptive immune response|myeloid progenitor cell differentiation|leukocyte migration involved in inflammatory response|cell-matrix adhesion|spermatid development|blood coagulation|transmission of nerve impulse|establishment of cell polarity|extracellular matrix organization|myelination|leukocyte migration|regulation of neutrophil chemotaxis|regulation of actin …	integrin binding|protein binding|protein homodimerization activity|protein heterodimerization activity|	10	-0.4	3.51	10	-0.1	0.54	-0.3	3.03	0.14	-1.4	0.4	0	0	0
ENSG00000189050	RNFT1	ring finger protein, transmembrane 1	integral component of membrane|	None	zinc ion binding|	10	0.4	1	10	0.6	2.39	0.5	3.02	0.141	-0.1	1.6	0	0	0
ENSG00000165409	TSHR	thyroid stimulating hormone receptor	plasma membrane|integral component of plasma membrane|receptor complex|	G-protein coupled receptor signaling pathway|G-protein coupled receptor signaling pathway, coupled to cyclic nucleotide second messenger|cell-cell signaling|positive regulation of cell proliferation|thyroid-stimulating hormone signaling pathway|thyroid-stimulating hormone signaling pathway|	thyroid-stimulating hormone receptor activity|protein binding|	10	0.3	3.01	10	0.1	0.771	0.2	3.02	0.141	-0.5	1.3	0	0	0
ENSG00000225781	OR6V1	olfactory receptor, family 6, subfamily V, member 1	plasma membrane|integral component of membrane|	G-protein coupled receptor signaling pathway|detection of chemical stimulus involved in sensory perception of smell|	G-protein coupled receptor activity|olfactory receptor activity|	10	0.5	4.59	10	-0.5	2.99	0.4	3.02	0.141	-1.5	1.2	0	0	0
ENSG00000103544	C16ORF62	chromosome 16 open reading frame 62	integral component of membrane|	None	None	10	-0.4	2.45	10	-0.5	0.77	-0.4	3.01	0.142	-1.5	0.4	0	0	0
ENSG00000091129	NRCAM	neuronal cell adhesion molecule	plasma membrane|integral component of plasma membrane|external side of plasma membrane|neuron projection|axon initial segment|synapse|	angiogenesis|neuron migration|axonogenesis|axon guidance|axonal fasciculation|synapse assembly|central nervous system development|protein localization|single organismal cell-cell adhesion|neuronal action potential propagation|regulation of axon extension|retinal ganglion cell axon guidance|heterotypic cell-cell adhesion|clustering of voltage-gated sodium channels|positive regulation of neuron dif…	protein binding|ankyrin binding|protein binding involved in heterotypic cell-cell adhesion|	10	-0.4	5.07	10	0	0	-0.4	3.01	0.142	-1.4	0.2	0	0	0
ENSG00000256574	OR13A1	olfactory receptor, family 13, subfamily A, member 1	plasma membrane|integral component of membrane|	G-protein coupled receptor signaling pathway|detection of chemical stimulus involved in sensory perception of smell|	G-protein coupled receptor activity|olfactory receptor activity|	10	-0.4	3.74	10	0	0	-0.4	2.99	0.143	-1.5	0.4	0	0	0
ENSG00000155158	TTC39B	tetratricopeptide repeat domain 39B	None	None	None	10	0.4	3.55	10	0.2	0.477	0.3	2.98	0.143	-0.5	1.4	0	0	0
ENSG00000186867	QRFPR	pyroglutamylated RFamide peptide receptor	plasma membrane|integral component of membrane|	G-protein coupled receptor signaling pathway|neuropeptide signaling pathway|	G-protein coupled receptor activity|neuropeptide Y receptor activity|	10	-0.4	3.92	10	-1.5	3.2	-0.3	2.97	0.144	-2.8	0.1	0	0	0
ENSG00000119714	GPR68	G protein-coupled receptor 68	plasma membrane|integral component of plasma membrane|	inflammatory response|G-protein coupled receptor signaling pathway|	G-protein coupled receptor activity|	10	-0.6	1.15	10	-0.4	2.18	-0.4	2.96	0.145	-1.6	0.5	0	0	0
ENSG00000179919	OR10A7	olfactory receptor, family 10, subfamily A, member 7	plasma membrane|integral component of membrane|	G-protein coupled receptor signaling pathway|detection of chemical stimulus involved in sensory perception of smell|	G-protein coupled receptor activity|olfactory receptor activity|	10	0.4	4.13	10	-1.4	4.15	0.4	2.95	0.145	-2	1	0	0	0
ENSG00000132824	SERINC3	serine incorporator 3	Golgi apparatus|plasma membrane|integral component of membrane|	positive regulation of intrinsic apoptotic signaling pathway in response to endoplasmic reticulum stress|	None	10	-0.4	3.17	10	0	0	-0.4	2.94	0.146	-1.4	0.5	0	0	0
ENSG00000163832	ELP6	elongator acetyltransferase complex subunit 6	Elongator holoenzyme complex|	chromatin organization|transcription, DNA-templated|regulation of transcription, DNA-templated|biological_process|positive regulation of cell migration|	molecular_function|	10	0.2	1.06	10	0.3	2.18	0.2	2.94	0.146	-0.4	1.6	0	0	0
ENSG00000110651	CD81	CD81 molecule	immunological synapse|plasma membrane|integral component of plasma membrane|membrane|vesicle|extracellular vesicular exosome|	activation of MAPK activity|phosphatidylinositol biosynthetic process|protein localization|cell proliferation|positive regulation of cell proliferation|positive regulation of 1-phosphatidylinositol 4-kinase activity|phosphatidylinositol metabolic process|viral entry into host cell|receptor-mediated virion attachment to host cell|positive regulation of peptidyl-tyrosine phosphorylation|regulation …	protein binding|MHC class II protein complex binding|	10	0	0	10	0.6	4.03	0.6	2.94	0.146	-0.5	1.7	0	0	0
ENSG00000090554	FLT3LG	fms-related tyrosine kinase 3 ligand	extracellular space|membrane|integral component of membrane|intrinsic component of external side of plasma membrane|	signal transduction|positive regulation of cell proliferation|lymphocyte differentiation|positive regulation of natural killer cell differentiation|embryonic hemopoiesis|	receptor binding|cytokine activity|receptor tyrosine kinase binding|protein homodimerization activity|	10	-0.4	1.89	10	-0.2	1.82	-0.3	2.94	0.146	-1.4	0.4	0	0	0
ENSG00000198877	OR5D13	olfactory receptor, family 5, subfamily D, member 13	plasma membrane|integral component of membrane|	G-protein coupled receptor signaling pathway|detection of chemical stimulus involved in sensory perception of smell|	G-protein coupled receptor activity|olfactory receptor activity|	10	-0.6	3.56	10	0.3	2.57	0.2	2.93	0.147	-1.6	0.8	0	0	0
ENSG00000174942	OR5R1	olfactory receptor, family 5, subfamily R, member 1	plasma membrane|integral component of membrane|	G-protein coupled receptor signaling pathway|detection of chemical stimulus involved in sensory perception of smell|	G-protein coupled receptor activity|olfactory receptor activity|	10	0.4	3.13	10	-0.9	4.32	-0.7	2.93	0.147	-1.9	0.6	0	0	0
ENSG00000188763	FZD9	frizzled class receptor 9	cytoplasm|plasma membrane|cell surface|integral component of membrane|filopodium membrane|perinuclear region of cytoplasm|	vasculature development|G-protein coupled receptor signaling pathway|nervous system development|neuroblast proliferation|brain development|learning or memory|gonad development|B cell differentiation|canonical Wnt signaling pathway|	G-protein coupled receptor activity|Wnt-protein binding|PDZ domain binding|protein homodimerization activity|Wnt-activated receptor activity|protein heterodimerization activity|	10	0.6	2.78	10	0.2	1.89	0.3	2.92	0.147	-1	1.4	0	0	0
ENSG00000145817	YIPF5	Yip1 domain family, member 5	endoplasmic reticulum membrane|integral component of membrane|ER to Golgi transport vesicle|Golgi cisterna membrane|endoplasmic reticulum exit site|	protein transport|vesicle-mediated transport|regulation of ER to Golgi vesicle-mediated transport|	None	9	0.4	2.69	9	0.4	0.412	0.4	2.92	0.147	-0.7	1.6	0	0	0
ENSG00000182854	OR4F15	olfactory receptor, family 4, subfamily F, member 15	plasma membrane|integral component of membrane|	G-protein coupled receptor signaling pathway|detection of chemical stimulus involved in sensory perception of smell|	G-protein coupled receptor activity|olfactory receptor activity|	9	-0.5	0.947	9	0.6	5.31	0.5	2.92	0.147	-1	1.6	0	0	0
ENSG00000182585	EPGN	epithelial mitogen	extracellular region|integral component of plasma membrane|	MAPK cascade|activation of MAPK activity|angiogenesis|positive regulation of cell proliferation|positive regulation of MAP kinase activity|positive regulation of epidermal growth factor-activated receptor activity|positive regulation of mitosis|positive regulation of epithelial cell proliferation|	MAP kinase kinase activity|epidermal growth factor receptor binding|growth factor activity|	10	-0.6	2.58	10	-0.3	1.15	-0.5	2.92	0.147	-1.6	0.6	0	0	0
ENSG00000169313	P2RY12	purinergic receptor P2Y, G-protein coupled, 12	plasma membrane|caveola|external side of plasma membrane|basal plasma membrane|integral component of membrane|intrinsic component of membrane|	adenosine receptor signaling pathway|G-protein coupled receptor signaling pathway|adenylate cyclase-inhibiting G-protein coupled receptor signaling pathway|blood coagulation|hemostasis|negative regulation of norepinephrine secretion|cell projection organization|platelet activation|G-protein coupled purinergic nucleotide receptor signaling pathway|G-protein coupled purinergic nucleotide receptor s…	G-protein coupled adenosine receptor activity|ADP receptor activity|ADP receptor activity|guanyl-nucleotide exchange factor activity|	10	0	0	10	0.5	5.43	0.4	2.92	0.147	-1.1	1.5	0	0	0
ENSG00000150527	CTAGE5	CTAGE family, member 5	membrane|	positive regulation of catalytic activity|	enzyme activator activity|	5	-0.8	4.1	5	-0.2	0.407	-0.6	2.91	0.148	-2	0.3	0	0	0
ENSG00000128335	APOL2	apolipoprotein L, 2	extracellular region|endoplasmic reticulum membrane|membrane|	lipid metabolic process|lipid transport|acute-phase response|multicellular organismal development|cholesterol metabolic process|lipoprotein metabolic process|maternal process involved in female pregnancy|	receptor binding|high-density lipoprotein particle binding|lipid binding|	10	-0.5	3.68	10	-0.2	1.06	-0.3	2.91	0.148	-1.4	0.6	0	0	0
ENSG00000253305	PCDHGB6	protocadherin gamma subfamily B, 6	plasma membrane|integral component of membrane|	homophilic cell adhesion|	calcium ion binding|	5	0.1	0.157	5	-0.7	4.3	-0.4	2.9	0.149	-2	0.4	0	0	0
ENSG00000165325	CCDC67	coiled-coil domain containing 67	cytoplasm|deuterosome|	cell projection organization|de novo centriole assembly|	None	10	-0.2	1.18	10	0.8	5.64	0.8	2.9	0.149	-0.4	1.9	0	0	0
ENSG00000164855	TMEM184A	transmembrane protein 184A	integral component of membrane|early endosome membrane|	germ-line sex determination|regulation of protein localization|regulation of secretion|	None	10	0.3	1.84	10	-0.7	3.05	-0.5	2.89	0.149	-1.6	0.6	0	0	0
ENSG00000110675	ELMOD1	ELMO/CED-12 domain containing 1	cytoskeleton|	phagocytosis|positive regulation of GTPase activity|positive regulation of GTPase activity|	GTPase activator activity|	10	-0.1	0.185	10	-0.3	4.2	-0.3	2.89	0.149	-1.4	0.3	0	0	0
ENSG00000107165	TYRP1	tyrosinase-related protein 1	endosome membrane|integral component of membrane|clathrin-coated endocytic vesicle membrane|melanosome membrane|melanosome|	melanocyte differentiation|melanosome organization|melanin biosynthetic process|acetoacetic acid metabolic process|oxidation-reduction process|	copper ion binding|protein binding|oxidoreductase activity, acting on paired donors, with incorporation or reduction of molecular oxygen, another compound as one donor, and incorporation of one atom of oxygen|protein homodimerization activity|protein heterodimerization activity|	10	-0.1	0.0137	10	-0.4	3.21	-0.3	2.88	0.15	-1.5	0.3	0	0	0
ENSG00000256797	KLRF2	killer cell lectin-like receptor subfamily F, member 2	integral component of plasma membrane|	natural killer cell degranulation|cytokine secretion|	protein binding|carbohydrate binding|protein homodimerization activity|	10	0.2	1.74	10	0.2	1.35	0.2	2.88	0.15	-0.8	1.2	0	0	0
ENSG00000085831	TTC39A	tetratricopeptide repeat domain 39A	cellular_component|	biological_process|	molecular_function|	10	-0.6	2.43	10	-0.9	1.12	-0.6	2.88	0.15	-1.7	0.2	0	0	0
ENSG00000258713	C20ORF141	chromosome 20 open reading frame 141	integral component of membrane|	None	None	8	0.7	2.56	8	0.6	0.691	0.7	2.87	0.151	-0.2	1.9	0	0	0
ENSG00000078589	P2RY10	purinergic receptor P2Y, G-protein coupled, 10	plasma membrane|integral component of membrane|	G-protein coupled purinergic nucleotide receptor signaling pathway|	G-protein coupled purinergic nucleotide receptor activity|	10	-1	0.866	10	0.4	4.74	0.3	2.87	0.151	-1.4	1.6	0	0	0
ENSG00000165548	TMEM63C	transmembrane protein 63C	integral component of membrane|	cation transport|	calcium activated cation channel activity|	10	0.1	0.142	10	0.5	3.86	0.4	2.87	0.151	-1.7	1.1	0	0	0
ENSG00000259024	TVP23C-CDRT4	TVP23C-CDRT4 readthrough	None	None	None	8	-0.1	0.265	8	-1.1	5.62	-1.1	2.86	0.152	-2	0.2	0	0	0
ENSG00000186943	OR13C8	olfactory receptor, family 13, subfamily C, member 8	plasma membrane|integral component of membrane|	G-protein coupled receptor signaling pathway|detection of chemical stimulus involved in sensory perception of smell|	G-protein coupled receptor activity|olfactory receptor activity|	10	0.2	1.7	10	0.3	1.45	0.2	2.86	0.152	-0.7	1.3	0	0	0
ENSG00000243729	OR5V1	olfactory receptor, family 5, subfamily V, member 1	plasma membrane|integral component of membrane|	G-protein coupled receptor signaling pathway|detection of chemical stimulus involved in sensory perception of smell|	G-protein coupled receptor activity|olfactory receptor activity|	10	0.7	3.84	10	0.3	1.01	0.4	2.86	0.152	-0.8	1.7	0	0	0
ENSG00000124215	CDH26	cadherin 26	plasma membrane|integral component of membrane|	homophilic cell adhesion|	calcium ion binding|	10	-0.2	1.75	10	-0.3	1.36	-0.3	2.85	0.152	-1.5	0.7	0	0	0
ENSG00000105370	LIM2	lens intrinsic membrane protein 2, 19kDa	plasma membrane|integral component of membrane|cell junction|vesicle|	lens development in camera-type eye|cell-cell junction assembly|	structural constituent of eye lens|	9	-0.2	1.72	9	0.4	1.64	-0.2	2.85	0.152	-1.6	1	0	0	0
ENSG00000196639	HRH1	histamine receptor H1	plasma membrane|integral component of plasma membrane|	inflammatory response|G-protein coupled receptor signaling pathway|phospholipase C-activating G-protein coupled receptor signaling pathway|memory|visual learning|positive regulation of inositol trisphosphate biosynthetic process|regulation of vascular permeability|positive regulation of vasoconstriction|inositol phosphate-mediated signaling|regulation of synaptic plasticity|eosinophil chemotaxis|…	G-protein coupled receptor activity|histamine receptor activity|	10	-0.1	0.0861	10	-1.3	5.23	-1.2	2.85	0.152	-2	0.1	0	0	0
ENSG00000147255	IGSF1	immunoglobulin superfamily, member 1	extracellular region|membrane|integral component of membrane|	regulation of transcription, DNA-templated|signal transduction|	receptor activity|protein binding|coreceptor activity|inhibin binding|	10	0	0	10	0.4	3.78	0.4	2.84	0.153	-0.6	1.5	0	0	0
ENSG00000233788	SPATA31A5	SPATA31 subfamily A, member 5	integral component of membrane|	spermatogenesis|cell differentiation|	None	9	-0.1	0.0601	9	1.1	5.95	1.1	2.82	0.154	-0.2	2	0	0	0
ENSG00000174957	OR5J2	olfactory receptor, family 5, subfamily J, member 2	plasma membrane|integral component of membrane|	G-protein coupled receptor signaling pathway|detection of chemical stimulus involved in sensory perception of smell|	G-protein coupled receptor activity|olfactory receptor activity|	10	-0.1	0.194	10	-0.4	3.55	-0.3	2.81	0.155	-1.5	0.4	0	0	0
ENSG00000188269	OR7A5	olfactory receptor, family 7, subfamily A, member 5	plasma membrane|integral component of membrane|	G-protein coupled receptor signaling pathway|sensory perception of smell|detection of chemical stimulus involved in sensory perception of smell|detection of chemical stimulus involved in sensory perception of smell|	G-protein coupled receptor activity|olfactory receptor activity|	10	-0.2	0.274	10	-0.8	3.43	-0.4	2.81	0.155	-1.7	0.2	0	0	0
ENSG00000213714	FAM209B	family with sequence similarity 209, member B	nucleus|integral component of membrane|	None	None	8	-0.3	3.52	8	-0.1	0.0184	-0.3	2.8	0.156	-1.5	0.8	0	0	0
ENSG00000007908	SELE	selectin E	extracellular space|plasma membrane|caveola|coated pit|integral component of membrane|cortical cytoskeleton|membrane raft|perinuclear region of cytoplasm|	positive regulation of receptor internalization|leukocyte migration involved in inflammatory response|positive regulation of leukocyte migration|inflammatory response|heterophilic cell-cell adhesion|leukocyte cell-cell adhesion|activation of phospholipase C activity|blood coagulation|calcium-mediated signaling|actin filament-based process|response to lipopolysaccharide|response to tumor necrosis …	transmembrane signaling receptor activity|protein binding|sialic acid binding|phospholipase binding|oligosaccharide binding|	10	0.3	3.27	10	1.4	5.06	1.4	2.8	0.156	-0.2	2	0	0	0
ENSG00000101916	TLR8	toll-like receptor 8	Golgi membrane|endoplasmic reticulum membrane|endosome membrane|integral component of membrane|endolysosome membrane|	toll-like receptor signaling pathway|microglial cell activation involved in immune response|MyD88-dependent toll-like receptor signaling pathway|inflammatory response|I-kappaB kinase/NF-kappaB signaling|response to virus|immunoglobulin mediated immune response|toll-like receptor 8 signaling pathway|toll-like receptor 9 signaling pathway|positive regulation of interferon-gamma biosynthetic process…	DNA binding|RNA binding|double-stranded RNA binding|single-stranded RNA binding|receptor activity|drug binding|	10	0.4	2.46	10	0.2	0.738	0.2	2.79	0.157	-0.6	1.4	0	0	0
ENSG00000144771	LRTM1	leucine-rich repeats and transmembrane domains 1	integral component of membrane|	None	None	10	-0.1	0.174	10	1.6	4.81	-0.3	2.79	0.157	-1.2	2.8	0	0	0
ENSG00000074855	ANO8	anoctamin 8	intracellular|plasma membrane|plasma membrane|integral component of membrane|	chloride transport|ion transmembrane transport|transmembrane transport|chloride transmembrane transport|	intracellular calcium activated chloride channel activity|	10	0.7	3.4	10	-0.6	1.52	-0.5	2.79	0.157	-1.3	1.6	0	0	0
ENSG00000169214	OR6F1	olfactory receptor, family 6, subfamily F, member 1	plasma membrane|integral component of membrane|	G-protein coupled receptor signaling pathway|detection of chemical stimulus involved in sensory perception of smell|	G-protein coupled receptor activity|olfactory receptor activity|	10	0.3	0.728	10	-1.1	2.59	-1.2	2.78	0.157	-2	0.6	0	0	0
ENSG00000173706	HEG1	heart development protein with EGF-like domains 1	extracellular region|cell-cell junction|external side of plasma membrane|integral component of membrane|	vasculogenesis|in utero embryonic development|endothelial cell morphogenesis|lymph vessel development|lymph circulation|cardiac atrium morphogenesis|ventricular septum development|cell-cell junction assembly|post-embryonic development|lung development|multicellular organism growth|venous blood vessel morphogenesis|regulation of body fluid levels|pericardium development|	calcium ion binding|	10	0.3	1.98	10	0.4	0.999	0.4	2.77	0.158	-0.4	1.5	0	0	0
ENSG00000171840	NINJ2	ninjurin 2	integral component of plasma membrane|	neuron cell-cell adhesion|nervous system development|tissue regeneration|	None	10	-0.8	5.94	10	0	0	-0.8	2.77	0.158	-2	0.2	0	0	0
ENSG00000179817	MRGPRX4	MAS-related GPR, member X4	plasma membrane|integral component of membrane|	G-protein coupled receptor signaling pathway|	G-protein coupled receptor activity|	10	-0.2	1.28	10	0.4	2.87	0.3	2.77	0.158	-0.7	1.5	0	0	0
ENSG00000148734	NPFFR1	neuropeptide FF receptor 1	plasma membrane|integral component of membrane|	neuropeptide signaling pathway|neuropeptide signaling pathway|biological_process|	G-protein coupled receptor activity|neuropeptide receptor activity|	10	-0.3	0.731	10	-0.8	3.38	-0.6	2.76	0.159	-1.7	0.3	0	0	0
ENSG00000113205	PCDHB3	protocadherin beta 3	integral component of plasma membrane|integral component of membrane|	cell adhesion|homophilic cell adhesion|synaptic transmission|nervous system development|synapse assembly|calcium-dependent cell-cell adhesion|	calcium ion binding|	10	0.4	3.46	10	0	0	0.3	2.76	0.159	-0.4	1.5	0	0	0
ENSG00000128596	CCDC136	coiled-coil domain containing 136	mitochondrion|integral component of membrane|	None	None	10	0.1	0.375	10	0.9	5.35	0.8	2.76	0.159	0	2	0	0	0
ENSG00000170775	GPR37	G protein-coupled receptor 37 (endothelin receptor type B-like)	endoplasmic reticulum membrane|integral component of plasma membrane|receptor complex|	G-protein coupled receptor signaling pathway|	G-protein coupled receptor activity|	10	1	2.59	10	0.2	1.62	0.2	2.75	0.16	-1	1.9	0	0	0
ENSG00000079112	CDH17	cadherin 17, LI cadherin (liver-intestine)	integral component of membrane|basolateral plasma membrane|	transport|oligopeptide transport|cell adhesion|homophilic cell adhesion|calcium-dependent cell-cell adhesion|oligopeptide transmembrane transport|	transporter activity|proton-dependent oligopeptide secondary active transmembrane transporter activity|calcium ion binding|	10	0.3	3.52	10	0	0	0.3	2.75	0.16	-0.8	1.3	0	0	0
ENSG00000232070	TMEM253	transmembrane protein 253	integral component of membrane|	None	None	10	0.8	4.35	10	0.2	0.569	0.4	2.75	0.16	-0.3	1.8	0	0	0
ENSG00000164129	NPY5R	neuropeptide Y receptor Y5	cytoplasm|plasma membrane|integral component of plasma membrane|	positive regulation of acute inflammatory response|outflow tract morphogenesis|cardiac left ventricle morphogenesis|G-protein coupled receptor signaling pathway|neuropeptide signaling pathway|neuropeptide signaling pathway|synaptic transmission|negative regulation of glutamate secretion|negative regulation of synaptic transmission, GABAergic|eating behavior|negative regulation of apoptotic proces…	peptide YY receptor activity|pancreatic polypeptide receptor activity|neuropeptide Y receptor activity|	9	-0.2	1.85	9	-1.1	4.44	-0.6	2.75	0.16	-1.9	0	0	0	0
ENSG00000182885	GPR97	G protein-coupled receptor 97	plasma membrane|integral component of membrane|	neuropeptide signaling pathway|	G-protein coupled receptor activity|	10	-0.2	0.282	10	0.4	5.2	0.4	2.74	0.16	-0.7	1.4	0	0	0
ENSG00000140030	GPR65	G protein-coupled receptor 65	plasma membrane|plasma membrane|integral component of plasma membrane|	apoptotic process|immune response|G-protein coupled receptor signaling pathway|multicellular organismal development|response to acidity|positive regulation of cAMP biosynthetic process|actin cytoskeleton reorganization|activation of Rho GTPase activity|positive regulation of stress fiber assembly|	G-protein coupled receptor activity|	10	-0.2	0.824	10	-0.3	2.29	-0.2	2.74	0.16	-1.2	1.1	0	0	0
ENSG00000146416	AIG1	androgen-induced 1	integral component of membrane|	None	protein binding|	10	0	0	10	0.7	3.56	0.7	2.74	0.16	-0.3	1.8	0	0	0
ENSG00000188771	PLET1	placenta expressed transcript 1	external side of plasma membrane|apical plasma membrane|anchored component of membrane|	negative regulation of cell-matrix adhesion|cell differentiation|positive regulation of cell migration|wound healing, spreading of epidermal cells|	None	10	0.5	1.52	10	0.8	2.06	0.6	2.74	0.16	-0.6	1.7	0	0	0
ENSG00000140274	DUOXA2	dual oxidase maturation factor 2	endoplasmic reticulum membrane|integral component of membrane|	protein transport|	None	10	0.3	1.73	10	0.3	1.2	0.3	2.73	0.161	-0.9	1.3	0	0	0
ENSG00000159899	NPR2	natriuretic peptide receptor 2	plasma membrane|integral component of membrane|	ossification|cGMP biosynthetic process|protein phosphorylation|signal transduction|cell surface receptor signaling pathway|receptor guanylyl cyclase signaling pathway|regulation of blood pressure|intracellular signal transduction|bone development|cellular response to granulocyte macrophage colony-stimulating factor stimulus|	guanylate cyclase activity|protein kinase activity|receptor activity|transmembrane signaling receptor activity|ATP binding|GTP binding|natriuretic peptide receptor activity|peptide hormone binding|hormone binding|identical protein binding|	10	0.3	1.01	10	0.2	1.98	0.2	2.73	0.161	-0.4	1.4	0	0	0
ENSG00000112276	BVES	blood vessel epicardial substance	plasma membrane|tight junction|integral component of membrane|integral component of membrane|lateral plasma membrane|	positive regulation of receptor recycling|muscle organ development|regulation of cell shape|vesicle-mediated transport|regulation of Rac GTPase activity|substrate adhesion-dependent cell spreading|positive regulation of locomotion|regulation of Cdc42 GTPase activity|epithelial cell-cell adhesion|	structural molecule activity|	10	0.7	2.23	10	0.3	1.57	0.6	2.73	0.161	-1.3	1.5	0	0	0
ENSG00000122718	OR2S2	olfactory receptor, family 2, subfamily S, member 2	plasma membrane|integral component of membrane|	G-protein coupled receptor signaling pathway|sensory perception of smell|detection of chemical stimulus involved in sensory perception of smell|detection of chemical stimulus involved in sensory perception of smell|	G-protein coupled receptor activity|olfactory receptor activity|	10	-0.7	3.87	10	-0.2	0.658	-0.5	2.73	0.161	-1.8	0.2	0	0	0
ENSG00000106123	EPHB6	EPH receptor B6	extracellular region|integral component of plasma membrane|	protein phosphorylation|parathyroid hormone secretion|ephrin receptor signaling pathway|calcium ion homeostasis|	receptor activity|ephrin receptor activity|ATP binding|	10	0.1	0.608	10	0.2	2.37	0.2	2.73	0.161	-0.6	1.5	0	0	0
ENSG00000171561	OR2AT4	olfactory receptor, family 2, subfamily AT, member 4	plasma membrane|integral component of membrane|	G-protein coupled receptor signaling pathway|detection of chemical stimulus involved in sensory perception of smell|	G-protein coupled receptor activity|olfactory receptor activity|	10	-0.1	0.0896	10	-0.5	2.94	-0.5	2.73	0.161	-1.6	0.3	0	0	0
ENSG00000124194	GDAP1L1	ganglioside induced differentiation associated protein 1-like 1	None	None	None	10	-0.2	0.371	10	-0.4	2.91	-0.3	2.73	0.161	-0.9	1.9	0	0	0
ENSG00000197430	OPALIN	oligodendrocytic myelin paranodal and inner loop protein	Golgi apparatus|plasma membrane|integral component of membrane|	None	None	10	-0.3	2.86	10	-0.1	0.37	-0.2	2.72	0.162	-1.5	0.5	0	0	0
ENSG00000167874	TMEM88	transmembrane protein 88	plasma membrane|integral component of membrane|	multicellular organismal development|Wnt signaling pathway|	None	10	-0.4	3.51	10	0.4	2.11	-0.4	2.72	0.162	-1.6	0.8	0	0	0
ENSG00000099715	PCDH11Y	protocadherin 11 Y-linked	plasma membrane|integral component of membrane|	homophilic cell adhesion|	calcium ion binding|	10	-0.5	3.48	10	0.3	3.8	0.3	2.72	0.162	-1.4	1	0	0	0
ENSG00000149177	PTPRJ	protein tyrosine phosphatase, receptor type, J	immunological synapse|plasma membrane|integral component of plasma membrane|cell-cell junction|cell surface|ruffle membrane|extracellular vesicular exosome|	vasculogenesis|heart development|blood coagulation|negative regulation of cell proliferation|positive regulation of platelet activation|negative regulation of platelet-derived growth factor receptor signaling pathway|positive regulation of macrophage chemotaxis|regulation of cell adhesion|negative regulation of cell growth|negative regulation of cell migration|peptidyl-tyrosine dephosphorylation|…	protein tyrosine phosphatase activity|protein tyrosine phosphatase activity|platelet-derived growth factor receptor binding|protein binding|beta-catenin binding|phosphatase activity|phosphatase activity|protein kinase binding|gamma-catenin binding|mitogen-activated protein kinase binding|delta-catenin binding|	10	0.5	5.26	10	-0.2	0.396	0.4	2.72	0.162	-0.9	1.5	0	0	0
ENSG00000163069	SGCB	sarcoglycan, beta (43kDa dystrophin-associated glycoprotein)	cytoplasm|cytoskeleton|integral component of plasma membrane|dystrophin-associated glycoprotein complex|sarcoglycan complex|sarcolemma|	muscle organ development|cardiocyte differentiation|	None	10	-0.3	3.2	10	0.1	0.13	-0.3	2.71	0.163	-1.3	0.8	0	0	0
ENSG00000170876	TMEM43	transmembrane protein 43	nuclear inner membrane|endoplasmic reticulum|Golgi apparatus|integral component of membrane|	None	protein binding|	10	-0.2	2.52	10	-0.2	0.356	-0.2	2.71	0.163	-1.4	0.5	0	0	0
ENSG00000116138	DNAJC16	DnaJ (Hsp40) homolog, subfamily C, member 16	integral component of membrane|	cell redox homeostasis|	None	10	-0.3	2.37	10	-0.1	0.601	-0.2	2.7	0.163	-1.3	0.5	0	0	0
ENSG00000146802	TMEM168	transmembrane protein 168	integral component of membrane|transport vesicle|	None	None	10	0.6	0.467	10	0.3	2.52	0.3	2.7	0.163	-1.3	1.3	0	0	0
ENSG00000256188	TAS2R30	taste receptor, type 2, member 30	plasma membrane|integral component of membrane|	detection of chemical stimulus involved in sensory perception of bitter taste|G-protein coupled receptor signaling pathway|	bitter taste receptor activity|	10	-0.5	0.981	10	-0.2	2.28	-0.2	2.7	0.163	-1.4	0.9	0	0	0
ENSG00000171860	C3AR1	complement component 3a receptor 1	plasma membrane|integral component of plasma membrane|	complement receptor mediated signaling pathway|chemotaxis|inflammatory response|G-protein coupled receptor signaling pathway|positive regulation of cytosolic calcium ion concentration|blood circulation|metabolic process|positive regulation vascular endothelial growth factor production|positive regulation of macrophage chemotaxis|positive regulation of angiogenesis|positive regulation of neutrophi…	phosphatidylinositol phospholipase C activity|complement component C3a receptor activity|G-protein coupled receptor activity|C3a anaphylatoxin receptor activity|	10	0.6	5.03	10	0	0	0.5	2.7	0.163	-0.9	1.7	0	0	0
ENSG00000163982	OTOP1	otopetrin 1	extracellular space|integral component of membrane|	detection of gravity|biomineral tissue development|inner ear morphogenesis|	None	10	0.2	1.25	10	0.3	1.68	0.2	2.69	0.164	-1.2	1.1	0	0	0
ENSG00000133597	ADCK2	aarF domain containing kinase 2	mitochondrion|integral component of membrane|	protein phosphorylation|	protein serine/threonine kinase activity|ATP binding|	10	0.2	2.7	10	0.1	0.633	0.2	2.69	0.164	-0.7	1.3	0	0	0
ENSG00000166471	TMEM41B	transmembrane protein 41B	integral component of membrane|	nervous system development|	None	10	1	3.62	9	-0.9	2.86	-0.4	2.68	0.165	-1.5	1.8	0	0	0
ENSG00000173698	GPR64	G protein-coupled receptor 64	integral component of plasma membrane|integral component of membrane|apical plasma membrane|extracellular vesicular exosome|	G-protein coupled receptor signaling pathway|neuropeptide signaling pathway|spermatogenesis|	G-protein coupled receptor activity|	10	0.7	2.35	10	-1.2	2.21	0.8	2.68	0.165	-1.7	1.7	0	0	0
ENSG00000169508	GPR183	G protein-coupled receptor 183	plasma membrane|integral component of plasma membrane|	mature B cell differentiation involved in immune response|immune response|humoral immune response|G-protein coupled receptor signaling pathway|positive regulation of B cell proliferation|positive regulation of ERK1 and ERK2 cascade|	G-protein coupled receptor activity|oxysterol binding|	10	-0.1	0.387	10	-0.3	2.5	-0.3	2.68	0.165	-1.2	1.7	0	0	0
ENSG00000183807	FAM162B	family with sequence similarity 162, member B	integral component of membrane|	None	None	10	-0.3	0.869	10	-0.3	1.98	-0.3	2.67	0.166	-1.6	0.2	0	0	0
ENSG00000271079	CTAGE15	CTAGE family, member 15	integral component of membrane|	None	None	10	-0.2	1.32	10	-0.3	1.56	-0.3	2.67	0.166	-1.4	0.5	0	0	0
ENSG00000132965	ALOX5AP	arachidonate 5-lipoxygenase-activating protein	nuclear envelope|nuclear envelope|endoplasmic reticulum|endoplasmic reticulum membrane|cytosol|membrane|integral component of membrane|nuclear membrane|	leukotriene production involved in inflammatory response|positive regulation of acute inflammatory response|leukotriene metabolic process|arachidonic acid metabolic process|leukotriene biosynthetic process|lipoxygenase pathway|positive regulation of catalytic activity|small molecule metabolic process|protein homotrimerization|cellular response to calcium ion|lipoxin metabolic process|	protein binding|enzyme activator activity|enzyme binding|protein homodimerization activity|protein heterodimerization activity|protein N-terminus binding|arachidonic acid binding|	10	-0.2	0.384	10	-0.4	2.65	-0.4	2.67	0.166	-1.5	0.6	0	0	0
ENSG00000170214	ADRA1B	adrenoceptor alpha 1B	nucleus|plasma membrane|integral component of plasma membrane|nuclear membrane|	blood vessel remodeling|response to amphetamine|vasoconstriction of artery involved in baroreceptor response to lowering of systemic arterial blood pressure|positive regulation of heart rate by epinephrine-norepinephrine|positive regulation of the force of heart contraction by epinephrine-norepinephrine|G-protein coupled receptor signaling pathway|adenylate cyclase-modulating G-protein coupled re…	alpha1-adrenergic receptor activity|protein heterodimerization activity|	10	-0.2	0.216	10	-0.6	3.35	-0.3	2.66	0.166	-1.7	0.3	0	0	0
ENSG00000173705	SUSD5	sushi domain containing 5	integral component of membrane|	cell adhesion|	hyaluronic acid binding|	10	-0.3	1.24	10	1	3.56	0.9	2.66	0.166	-0.6	2	0	0	0
ENSG00000134545	KLRC1	killer cell lectin-like receptor subfamily C, member 1	plasma membrane|integral component of plasma membrane|	cell surface receptor signaling pathway|regulation of immune response|	transmembrane signaling receptor activity|carbohydrate binding|	10	-0.3	2.92	10	-0.1	0.601	-0.2	2.66	0.166	-1.6	0.3	0	0	0
ENSG00000186567	CEACAM19	carcinoembryonic antigen-related cell adhesion molecule 19	integral component of membrane|	None	None	10	-0.4	5.1	10	0	0	-0.4	2.66	0.166	-1.5	0.3	0	0	0
ENSG00000144476	ACKR3	atypical chemokine receptor 3	endosome|early endosome|plasma membrane|plasma membrane|coated pit|cell surface|integral component of membrane|perinuclear region of cytoplasm|recycling endosome|	angiogenesis|vasculogenesis|chemotaxis|cell adhesion|G-protein coupled receptor signaling pathway|viral process|receptor internalization|chemokine-mediated signaling pathway|positive regulation of ERK1 and ERK2 cascade|negative regulation of intrinsic apoptotic signaling pathway in response to DNA damage|	scavenger receptor activity|protein binding|coreceptor activity|C-X-C chemokine receptor activity|C-X-C chemokine binding|	10	0.3	0.628	10	-0.3	4.78	-0.3	2.66	0.166	-1.3	0.9	0	0	0
ENSG00000167920	TMEM99	transmembrane protein 99	integral component of membrane|	None	None	9	-1.2	4.6	9	-0.3	1.72	-1	2.65	0.167	-2	0.8	0	0	0
ENSG00000179695	OR6C2	olfactory receptor, family 6, subfamily C, member 2	plasma membrane|integral component of membrane|	G-protein coupled receptor signaling pathway|sensory perception of smell|detection of chemical stimulus involved in sensory perception of smell|detection of chemical stimulus involved in sensory perception of smell|	G-protein coupled receptor activity|olfactory receptor activity|	10	-1.1	5.57	10	0	0	-1	2.65	0.167	-2	0.1	0	0	0
ENSG00000100647	KIAA0247	KIAA0247	cellular_component|integral component of membrane|	biological_process|	molecular_function|	10	-0.3	1.54	10	0.8	2.37	-0.3	2.64	0.168	-1.2	1.7	0	0	0
ENSG00000188558	OR2G6	olfactory receptor, family 2, subfamily G, member 6	plasma membrane|integral component of membrane|	G-protein coupled receptor signaling pathway|detection of chemical stimulus involved in sensory perception of smell|	G-protein coupled receptor activity|olfactory receptor activity|	10	-0.3	2.13	10	-0.2	0.961	-0.2	2.64	0.168	-1.1	1.4	0	0	0
ENSG00000221947	XKR9	XK, Kell blood group complex subunit-related family, member 9	integral component of membrane|	None	None	10	-0.4	0.832	10	-0.3	2.09	-0.3	2.64	0.168	-1.3	0.8	0	0	0
ENSG00000204070	SYS1	Sys1 golgi trafficking protein	Golgi membrane|integral component of membrane|	protein transport|	None	5	0.4	1.61	5	-0.7	3.73	-0.6	2.63	0.169	-2	0.9	0	0	0
ENSG00000063660	GPC1	glypican 1	proteinaceous extracellular matrix|extracellular space|endosome|Golgi lumen|plasma membrane|integral component of plasma membrane|anchored component of membrane|lysosomal lumen|membrane raft|membrane raft|extracellular vesicular exosome|	retinoid metabolic process|carbohydrate metabolic process|glycosaminoglycan biosynthetic process|glycosaminoglycan catabolic process|axon guidance|phototransduction, visible light|Schwann cell differentiation|heparan sulfate proteoglycan catabolic process|glycosaminoglycan metabolic process|chondroitin sulfate metabolic process|myelin assembly|negative regulation of fibroblast growth factor recep…	copper ion binding|fibroblast growth factor binding|laminin binding|heparan sulfate proteoglycan binding|	10	0.3	2.54	10	0.1	0.579	0.2	2.6	0.171	-0.5	1.4	0	0	0
ENSG00000112282	MED23	mediator complex subunit 23	nucleoplasm|transcription factor complex|mediator complex|	regulation of transcription, DNA-templated|regulation of transcription from RNA polymerase II promoter|transcription initiation from RNA polymerase II promoter|gene expression|	transcription coactivator activity|protein binding|	9	-0.4	1.56	9	-0.4	1.21	-0.4	2.59	0.172	-1.6	0.4	0	0	0
ENSG00000136928	GABBR2	gamma-aminobutyric acid (GABA) B receptor, 2	cytoplasm|plasma membrane|integral component of plasma membrane|cell junction|G-protein coupled receptor heterodimeric complex|neuron projection|postsynaptic membrane|	G-protein coupled receptor signaling pathway|negative regulation of adenylate cyclase activity|gamma-aminobutyric acid signaling pathway|synaptic transmission|	G-protein coupled GABA receptor activity|protein binding|	10	-0.2	0.533	10	0.2	2.86	0.2	2.59	0.172	-0.8	1.3	0	0	0
ENSG00000197467	COL13A1	collagen, type XIII, alpha 1	extracellular region|collagen type XIII trimer|endoplasmic reticulum lumen|plasma membrane|cell-cell junction|	morphogenesis of a branching structure|endochondral ossification|cell-matrix adhesion|single organismal cell-cell adhesion|extracellular matrix disassembly|cell differentiation|extracellular matrix organization|collagen catabolic process|	protein binding|heparin binding|	10	-0.7	0.713	10	-0.2	2.39	-0.2	2.59	0.172	-1.7	0.2	0	0	0
ENSG00000135973	GPR45	G protein-coupled receptor 45	plasma membrane|integral component of membrane|	G-protein coupled receptor signaling pathway|	G-protein coupled receptor activity|	10	-0.6	4.98	9	0	0	-0.5	2.59	0.172	-1.7	0.4	0	0	0
ENSG00000140931	CMTM3	CKLF-like MARVEL transmembrane domain containing 3	extracellular space|integral component of membrane|	chemotaxis|	cytokine activity|	10	-0.2	2.27	10	-0.3	0.653	-0.2	2.58	0.173	-1.4	0.4	0	0	0
ENSG00000166822	TMEM170A	transmembrane protein 170A	integral component of membrane|	None	None	6	0.2	0.465	6	0.3	2.32	0.2	2.57	0.173	-0.8	1.8	0	0	0
ENSG00000196936	OR2L8	olfactory receptor, family 2, subfamily L, member 8	plasma membrane|integral component of membrane|	G-protein coupled receptor signaling pathway|biological_process|detection of chemical stimulus involved in sensory perception of smell|	molecular_function|G-protein coupled receptor activity|olfactory receptor activity|	10	-0.3	2.15	10	0.3	0.914	-0.2	2.56	0.174	-1.4	0.8	0	0	0
ENSG00000187416	LHFPL3	lipoma HMGIC fusion partner-like 3	integral component of membrane|	None	None	10	-0.2	0.83	10	-0.8	2.32	-0.4	2.56	0.174	-1.7	0.6	0	0	0
ENSG00000164010	ERMAP	erythroblast membrane-associated protein (Scianna blood group)	plasma membrane|integral component of membrane|cytoplasmic vesicle|	None	None	10	-0.5	4.18	10	-0.1	0.123	-0.3	2.55	0.175	-1.6	0.2	0	0	0
ENSG00000068078	FGFR3	fibroblast growth factor receptor 3	extracellular region|nucleus|lysosome|endoplasmic reticulum|plasma membrane|integral component of plasma membrane|focal adhesion|cytoplasmic side of plasma membrane|cell surface|cytoplasmic membrane-bounded vesicle|perinuclear region of cytoplasm|	negative regulation of transcription from RNA polymerase II promoter|MAPK cascade|skeletal system development|positive regulation of endothelial cell proliferation|endochondral ossification|morphogenesis of an epithelium|chondrocyte differentiation|lens morphogenesis in camera-type eye|endochondral bone growth|epidermal growth factor receptor signaling pathway|JAK-STAT cascade|cell-cell signaling…	protein tyrosine kinase activity|fibroblast growth factor-activated receptor activity|protein binding|ATP binding|fibroblast growth factor binding|fibroblast growth factor binding|	10	0.4	4.09	10	-0.2	1.5	0.3	2.54	0.176	-0.7	1.4	0	0	0
ENSG00000176567	OR4X1	olfactory receptor, family 4, subfamily X, member 1	plasma membrane|integral component of membrane|	G-protein coupled receptor signaling pathway|detection of chemical stimulus involved in sensory perception of smell|	G-protein coupled receptor activity|olfactory receptor activity|	10	-1.2	0.777	10	0.3	2.74	0.3	2.54	0.176	-1.9	0.9	0	0	0
ENSG00000204308	RNF5	ring finger protein 5, E3 ubiquitin protein ligase	endoplasmic reticulum membrane|integral component of membrane|mitochondrial membrane|	cellular protein catabolic process|protein K63-linked ubiquitination|protein K48-linked ubiquitination|ER-associated misfolded protein catabolic process|	ubiquitin-protein transferase activity|protein binding|zinc ion binding|ligase activity|	10	0.3	1.71	10	-0.4	2.89	-0.3	2.54	0.176	-1.5	0.7	0	0	0
ENSG00000177752	YIPF7	Yip1 domain family, member 7	endoplasmic reticulum membrane|integral component of membrane|	None	None	10	0.1	0.0526	10	0.5	3.96	0.4	2.53	0.177	-0.3	1.6	0	0	0
ENSG00000124731	TREM1	triggering receptor expressed on myeloid cells 1	extracellular region|plasma membrane|integral component of membrane|	humoral immune response|blood coagulation|intracellular signal transduction|innate immune response|leukocyte migration|	receptor activity|scaffold protein binding|	10	-0.3	2.95	10	-0.1	0.3	-0.2	2.53	0.177	-1.4	0.5	0	0	0
ENSG00000173926	2020-03-03	membrane-associated ring finger (C3HC4) 3, E3 ubiquitin protein ligase	lysosome|endosome|integral component of membrane|cytoplasmic vesicle membrane|early endosome membrane|	endocytosis|protein ubiquitination|	zinc ion binding|ligase activity|	10	0.2	0.595	10	0.3	2.46	0.2	2.53	0.177	-0.5	1.4	0	0	0
ENSG00000145416	43891	membrane-associated ring finger (C3HC4) 1, E3 ubiquitin protein ligase	lysosome|lysosomal membrane|endosome|endoplasmic reticulum membrane|plasma membrane|integral component of membrane|cytoplasmic vesicle membrane|early endosome membrane|late endosome membrane|trans-Golgi network membrane|	protein polyubiquitination|antigen processing and presentation of peptide antigen via MHC class II|immune response|	ubiquitin-protein transferase activity|zinc ion binding|ligase activity|MHC protein binding|	9	0.6	4.9	10	0	0	0.5	2.52	0.177	-0.2	1.7	0	0	0
ENSG00000176142	TMEM39A	transmembrane protein 39A	integral component of membrane|	None	None	10	0.4	1.02	10	0.2	1.74	0.3	2.52	0.177	-0.7	1.4	0	0	0
ENSG00000198885	ITPRIPL1	inositol 1,4,5-trisphosphate receptor interacting protein-like 1	membrane|integral component of membrane|	None	None	10	-0.1	0.278	10	-0.6	3.58	-0.5	2.52	0.177	-1.6	0.3	0	0	0
ENSG00000221977	OR4E2	olfactory receptor, family 4, subfamily E, member 2	plasma membrane|integral component of membrane|	G-protein coupled receptor signaling pathway|detection of chemical stimulus involved in sensory perception of smell|	G-protein coupled receptor activity|olfactory receptor activity|	10	0.3	4.04	10	0	0	0.2	2.52	0.177	-0.9	1.4	0	0	0
ENSG00000123901	GPR83	G protein-coupled receptor 83	plasma membrane|integral component of membrane|	neuropeptide signaling pathway|response to glucocorticoid|	G-protein coupled receptor activity|neuropeptide Y receptor activity|	10	0.4	1.98	10	0.7	1.37	0.4	2.52	0.177	-0.8	1.7	0	0	0
ENSG00000188324	OR6C6	olfactory receptor, family 6, subfamily C, member 6	plasma membrane|integral component of membrane|	G-protein coupled receptor signaling pathway|detection of chemical stimulus involved in sensory perception of smell|	G-protein coupled receptor activity|olfactory receptor activity|	9	-0.3	2.14	10	0.6	1.35	-0.5	2.5	0.179	-1.5	1.1	0	0	0
ENSG00000214943	GPR33	G protein-coupled receptor 33 (gene/pseudogene)	plasma membrane|integral component of membrane|	G-protein coupled receptor signaling pathway|	G-protein coupled receptor activity|	10	-0.6	0.602	10	-0.5	2.15	-0.5	2.5	0.179	-1.7	0.6	0	0	0
ENSG00000176904	OR51H1P	olfactory receptor, family 51, subfamily H, member 1 pseudogene	plasma membrane|integral component of membrane|	G-protein coupled receptor signaling pathway|detection of chemical stimulus involved in sensory perception of smell|	G-protein coupled receptor activity|olfactory receptor activity|	10	0.4	2.53	10	-1.4	3.65	0.3	2.49	0.18	-2	1.1	0	0	0
ENSG00000100731	PCNX	pecanex homolog (Drosophila)	integral component of membrane|	None	None	10	-0.7	4.32	10	0.3	2.05	0.3	2.49	0.18	-1.8	1.1	0	0	0
ENSG00000162738	VANGL2	VANGL planar cell polarity protein 2	plasma membrane|cell-cell junction|integral component of membrane|basolateral plasma membrane|apical plasma membrane|lateral plasma membrane|cell pole|	establishment of planar polarity|neural tube closure|hair follicle development|heart looping|membranous septum morphogenesis|muscular septum morphogenesis|planar cell polarity pathway involved in axis elongation|Rho protein signal transduction|anterior/posterior pattern specification|convergent extension involved in neural plate elongation|glomerulus development|regulation of actin cytoskeleton o…	None	10	-0.6	4.76	10	0.1	0.227	-0.4	2.49	0.18	-1.8	0.2	0	0	0
ENSG00000164935	DCSTAMP	dendrocyte expressed seven transmembrane protein	endoplasmic reticulum membrane|integral component of plasma membrane|cell surface|endosome membrane|integral component of membrane|integral component of endoplasmic reticulum membrane|endoplasmic reticulum-Golgi intermediate compartment membrane|	negative regulation of cell growth|osteoclast differentiation|positive regulation of macrophage fusion|cellular response to macrophage colony-stimulating factor stimulus|myeloid dendritic cell differentiation|positive regulation of monocyte differentiation|positive regulation of bone resorption|membrane fusion|cellular response to interleukin-4|cellular response to tumor necrosis factor|osteoclas…	protein binding|	10	-1	4.63	10	-0.2	0.656	-0.8	2.48	0.181	-2	0.2	0	0	0
ENSG00000153495	TEX29	testis expressed 29	integral component of membrane|	None	None	10	-0.4	4.41	10	0	0	-0.3	2.48	0.181	-1.5	0.4	0	0	0
ENSG00000214814	FER1L6	fer-1-like family member 6	integral component of membrane|	None	None	10	0.3	0.58	10	0.2	2.12	0.2	2.48	0.181	-0.7	1.4	0	0	0
ENSG00000172243	CLEC7A	C-type lectin domain family 7, member A	cytoplasm|external side of plasma membrane|integral component of membrane|	detection of yeast|leukocyte activation involved in immune response|cell surface pattern recognition receptor signaling pathway|phagocytosis, recognition|phagocytosis, engulfment|inflammatory response|cell recognition|carbohydrate mediated signaling|single organismal cell-cell adhesion|positive regulation of tumor necrosis factor production|T cell activation|defense response to protozoan|innate i…	opsonin binding|(1->3)-beta-D-glucan binding|(1->3)-beta-D-glucan receptor activity|signaling pattern recognition receptor activity|carbohydrate binding|MHC protein binding|metal ion binding|	10	-1	0.0443	10	-0.5	3.82	-0.6	2.47	0.182	-1.9	0.2	0	0	0
ENSG00000162552	WNT4	wingless-type MMTV integration site family, member 4	extracellular region|proteinaceous extracellular matrix|extracellular space|cytoplasm|endoplasmic reticulum lumen|Golgi lumen|plasma membrane|cell surface|	branching involved in ureteric bud morphogenesis|kidney development|epithelial to mesenchymal transition|embryonic epithelial tube formation|liver development|androgen biosynthetic process|male gonad development|male gonad development|female gonad development|negative regulation of gene expression|negative regulation of steroid biosynthetic process|protein palmitoylation|regulation of cell-cell a…	transcription corepressor activity|frizzled binding|receptor agonist activity|	10	-0.2	2.38	10	-0.2	0.244	-0.2	2.47	0.182	-1.4	0.6	0	0	0
ENSG00000111886	GABRR2	gamma-aminobutyric acid (GABA) A receptor, rho 2	plasma membrane|integral component of plasma membrane|cell junction|chloride channel complex|postsynaptic membrane|	transport|signal transduction|gamma-aminobutyric acid signaling pathway|synaptic transmission|visual perception|ion transmembrane transport|transmembrane transport|chloride transmembrane transport|	GABA-A receptor activity|extracellular ligand-gated ion channel activity|chloride channel activity|protein domain specific binding|	9	-0.7	3.59	9	-0.2	1.09	-0.4	2.47	0.182	-1.8	0.7	0	0	0
ENSG00000178586	OR6B3	olfactory receptor, family 6, subfamily B, member 3	plasma membrane|integral component of membrane|	G-protein coupled receptor signaling pathway|detection of chemical stimulus involved in sensory perception of smell|	G-protein coupled receptor activity|olfactory receptor activity|	10	-0.3	3.28	10	0.7	0.996	-0.3	2.46	0.183	-1.2	1.4	0	0	0
ENSG00000158813	EDA	ectodysplasin A	extracellular region|collagen trimer|endoplasmic reticulum membrane|cytoskeleton|plasma membrane|integral component of plasma membrane|membrane|integral component of membrane|intracellular membrane-bounded organelle|apical part of cell|	immune response|cell-matrix adhesion|signal transduction|ectoderm development|gene expression|cell differentiation|positive regulation of NF-kappaB import into nucleus|odontogenesis of dentin-containing tooth|positive regulation of I-kappaB kinase/NF-kappaB signaling|pigmentation|positive regulation of NF-kappaB transcription factor activity|salivary gland cavitation|hair follicle placode formati…	receptor binding|tumor necrosis factor receptor binding|protein binding|	10	-0.2	0.155	10	-0.4	2.91	-0.3	2.46	0.183	-1.5	0.7	0	0	0
ENSG00000204257	HLA-DMA	major histocompatibility complex, class II, DM alpha	lysosomal membrane|multivesicular body|cell surface|membrane|integral component of membrane|late endosome membrane|MHC class II protein complex|extracellular vesicular exosome|	peptide antigen assembly with MHC class II protein complex|protein transport|immunoglobulin mediated immune response|antigen processing and presentation of exogenous peptide antigen via MHC class II|positive thymic T cell selection|positive regulation of T cell differentiation|inner ear development|positive regulation of immune response|chaperone mediated protein folding requiring cofactor|	MHC class II protein complex binding|	10	-0.4	3.26	10	0.8	4.64	-0.3	2.46	0.183	-0.8	1.9	0	0	0
ENSG00000106113	CRHR2	corticotropin releasing hormone receptor 2	endoplasmic reticulum|Golgi apparatus|plasma membrane|integral component of plasma membrane|cell surface|	adenylate cyclase-modulating G-protein coupled receptor signaling pathway|negative regulation of angiogenesis|positive regulation of cAMP-mediated signaling|negative regulation of cAMP-mediated signaling|cellular response to corticotropin-releasing hormone stimulus|	hormone activity|protein binding|corticotrophin-releasing factor receptor activity|	10	0.2	1.86	10	0.7	1.69	0.2	2.45	0.183	-0.3	1.7	0	0	0
ENSG00000146006	LRRTM2	leucine rich repeat transmembrane neuronal 2	integral component of membrane|cell junction|postsynaptic membrane|excitatory synapse|	synapse organization|	neurexin family protein binding|	10	1.6	5.88	10	0	0	1.6	2.45	0.183	-0.2	3	0	0	0
ENSG00000156535	CD109	CD109 molecule	extracellular space|plasma membrane|anchored component of membrane|	negative regulation of endopeptidase activity|negative regulation of transforming growth factor beta receptor signaling pathway|negative regulation of wound healing|	serine-type endopeptidase inhibitor activity|transforming growth factor beta binding|	10	-0.7	2.39	10	-0.2	1.14	-0.4	2.45	0.183	-1.8	0.3	0	0	0
ENSG00000140538	NTRK3	neurotrophic tyrosine kinase, receptor, type 3	cytoplasm|integral component of plasma membrane|receptor complex|	activation of MAPK activity|neuron migration|negative regulation of protein phosphorylation|transmembrane receptor protein tyrosine kinase signaling pathway|positive regulation of cell proliferation|positive regulation of gene expression|peptidyl-tyrosine phosphorylation|modulation by virus of host transcription|positive regulation of cell migration|activation of protein kinase B activity|activat…	p53 binding|transmembrane receptor protein tyrosine kinase activity|neurotrophin receptor activity|ATP binding|neurotrophin binding|ephrin receptor binding|	10	-0.8	1.82	10	-1.1	1.14	-1	2.45	0.183	-2	0.2	0	0	0
ENSG00000151892	GFRA1	GDNF family receptor alpha 1	plasma membrane|extrinsic component of membrane|anchored component of membrane|extracellular vesicular exosome|	cell surface receptor signaling pathway|axon guidance|glial cell-derived neurotrophic factor receptor signaling pathway|	receptor binding|glial cell-derived neurotrophic factor receptor activity|	10	0.3	1.16	10	0.2	1.52	0.2	2.44	0.184	-0.9	1.4	0	0	0
ENSG00000126262	FFAR2	free fatty acid receptor 2	plasma membrane|plasma membrane|integral component of plasma membrane|cell projection|	G-protein coupled receptor signaling pathway|cellular response to fatty acid|	G-protein coupled receptor activity|lipid binding|	10	-0.7	3.21	10	0.1	0.0776	-0.6	2.44	0.184	-1.9	0.4	0	0	0
ENSG00000197136	PCNXL3	pecanex-like 3 (Drosophila)	integral component of membrane|	None	None	10	-0.8	4.17	10	-0.2	0.972	-0.2	2.44	0.184	-2	0.5	0	0	0
ENSG00000184478	OR56A3	olfactory receptor, family 56, subfamily A, member 3	plasma membrane|integral component of membrane|	G-protein coupled receptor signaling pathway|detection of chemical stimulus involved in sensory perception of smell|	G-protein coupled receptor activity|olfactory receptor activity|	10	0.1	0.201	10	1	4.41	0.2	2.42	0.186	-0.4	2	0	0	0
ENSG00000019102	VSIG2	V-set and immunoglobulin domain containing 2	integral component of plasma membrane|membrane|	None	None	10	-0.2	1.16	10	-0.3	1.65	-0.2	2.42	0.186	-1.5	0.5	0	0	0
ENSG00000244355	LY6G6D	lymphocyte antigen 6 complex, locus G6D	plasma membrane|filopodium|anchored component of membrane|	None	None	10	-0.1	0.746	10	-0.3	2.41	-0.3	2.42	0.186	-1.4	0.7	0	0	0
ENSG00000172058	SERF1A	small EDRK-rich factor 1A (telomeric)	None	None	None	10	-0.6	2.92	10	-0.3	0.527	-0.5	2.42	0.186	-1.7	0.5	0	0	0
ENSG00000134762	DSC3	desmocollin 3	extracellular region|cytoplasm|plasma membrane|cell-cell junction|membrane|integral component of membrane|desmosome|	in utero embryonic development|cell adhesion|homophilic cell adhesion|protein stabilization|	calcium ion binding|gamma-catenin binding|	10	0.7	1.92	10	-0.9	5.4	-0.9	2.41	0.187	-2	1	0	0	0
ENSG00000167904	TMEM68	transmembrane protein 68	integral component of membrane|	metabolic process|	transferase activity, transferring acyl groups|	10	0.4	2.6	10	-0.3	1.86	-0.3	2.41	0.187	-1.2	1.2	0	0	0
ENSG00000125510	OPRL1	opiate receptor-like 1	plasma membrane|integral component of plasma membrane|cytoplasmic membrane-bounded vesicle|	adenylate cyclase-inhibiting G-protein coupled receptor signaling pathway|positive regulation of cytosolic calcium ion concentration|sensory perception|behavior|sensory perception of pain|opioid receptor signaling pathway|opioid receptor signaling pathway|	nociceptin receptor activity|G-protein coupled receptor activity|G-protein coupled receptor activity|protein binding|	10	-1.9	5.93	10	0	0	-1.9	2.41	0.187	-3	0	0	0	0
ENSG00000167700	MFSD3	major facilitator superfamily domain containing 3	integral component of membrane|	transmembrane transport|	None	10	0.3	2.06	10	0.4	0.706	0.3	2.4	0.188	-1	1.4	0	0	0
ENSG00000173585	CCR9	chemokine (C-C motif) receptor 9	plasma membrane|integral component of plasma membrane|	chemotaxis|immune response|cellular defense response|G-protein coupled receptor signaling pathway|positive regulation of cytosolic calcium ion concentration|chemokine-mediated signaling pathway|chemokine-mediated signaling pathway|	chemokine receptor activity|C-C chemokine receptor activity|	10	0.6	0.843	10	0.2	1.99	0.2	2.4	0.188	-0.4	1.7	0	0	0
ENSG00000122778	KIAA1549	KIAA1549	integral component of membrane|	None	None	10	-0.8	5.13	10	0.3	1.31	-0.8	2.4	0.188	-1.8	0.8	0	0	0
ENSG00000188000	OR7D2	olfactory receptor, family 7, subfamily D, member 2	plasma membrane|integral component of membrane|	regulation of transcription, DNA-templated|G-protein coupled receptor signaling pathway|detection of chemical stimulus involved in sensory perception of smell|	G-protein coupled receptor activity|olfactory receptor activity|	10	-0.3	2.23	10	-0.2	0.369	-0.3	2.39	0.189	-1.5	0.4	0	0	0
ENSG00000080815	PSEN1	presenilin 1	Golgi membrane|kinetochore|nuclear outer membrane|mitochondrion|mitochondrial inner membrane|lysosomal membrane|endoplasmic reticulum|endoplasmic reticulum membrane|smooth endoplasmic reticulum|rough endoplasmic reticulum|Golgi apparatus|centrosome|integral component of plasma membrane|cell cortex|cell surface|membrane|integral component of membrane|apical plasma membrane|Z disc|axon|growth cone|…	autophagic vacuole assembly|negative regulation of transcription from RNA polymerase II promoter|activation of MAPKK activity|blood vessel development|cell fate specification|somitogenesis|neuron migration|positive regulation of receptor recycling|heart looping|hematopoietic progenitor cell differentiation|T cell activation involved in immune response|myeloid leukocyte differentiation|protein gly…	endopeptidase activity|aspartic-type endopeptidase activity|calcium channel activity|protein binding|beta-catenin binding|PDZ domain binding|cadherin binding|	10	-0.4	2.33	10	-1.1	1.79	-0.3	2.39	0.189	-1.9	0.2	0	0	0
ENSG00000143994	ABHD1	abhydrolase domain containing 1	integral component of membrane|	biological_process|metabolic process|	molecular_function|hydrolase activity|	10	-0.1	0.0589	10	0.3	3.77	0.3	2.38	0.19	-0.7	1.6	0	0	0
ENSG00000109084	TMEM97	transmembrane protein 97	lysosome|rough endoplasmic reticulum|plasma membrane|integral component of membrane|nuclear membrane|	regulation of cell growth|cholesterol homeostasis|	protein binding|	10	0.5	4.29	10	0.1	0.19	0.4	2.38	0.19	-0.6	1.6	0	0	0
ENSG00000233412	OR5H15	olfactory receptor, family 5, subfamily H, member 15	plasma membrane|integral component of membrane|	G-protein coupled receptor signaling pathway|detection of chemical stimulus involved in sensory perception of smell|	G-protein coupled receptor activity|olfactory receptor activity|	8	0.7	5.06	8	-0.2	0.357	0.7	2.38	0.19	-0.8	2	0	0	0
ENSG00000143324	XPR1	xenotropic and polytropic retrovirus receptor 1	plasma membrane|integral component of plasma membrane|	G-protein coupled receptor signaling pathway|response to virus|	virus receptor activity|receptor activity|transmembrane signaling receptor activity|G-protein coupled receptor activity|	10	0.5	3.38	10	-0.8	0.0491	0.4	2.38	0.19	-1.6	1.3	0	0	0
ENSG00000105492	SIGLEC6	sialic acid binding Ig-like lectin 6	extracellular region|integral component of plasma membrane|membrane|	cell adhesion|cell-cell signaling|	None	10	-0.6	4.34	10	0	0	-0.3	2.37	0.191	-1.7	0.3	0	0	0
ENSG00000184613	NELL2	NEL-like 2 (chicken)	extracellular region|	None	calcium ion binding|protein binding|	10	0.1	0.433	10	-0.4	3.85	-0.3	2.37	0.191	-1.5	0.5	0	0	0
ENSG00000170017	ALCAM	activated leukocyte cell adhesion molecule	external side of plasma membrane|integral component of membrane|axon|neuronal cell body|extracellular vesicular exosome|	cell adhesion|signal transduction|axon guidance|motor neuron axon guidance|	receptor binding|	10	-0.1	0.0109	10	-0.4	2.91	-0.4	2.37	0.191	-1.6	0.3	0	0	0
ENSG00000121753	BAI2	brain-specific angiogenesis inhibitor 2	plasma membrane|integral component of membrane|	G-protein coupled receptor signaling pathway|neuropeptide signaling pathway|peripheral nervous system development|negative regulation of angiogenesis|	G-protein coupled receptor activity|	10	-0.3	2.47	10	-0.3	0.0342	-0.3	2.37	0.191	-1.3	1.1	0	0	0
ENSG00000162706	CADM3	cell adhesion molecule 3	plasma membrane|cell-cell junction|integral component of membrane|	homophilic cell adhesion|heterophilic cell-cell adhesion|protein localization|cell junction assembly|adherens junction organization|cell-cell junction organization|	protein homodimerization activity|	10	-0.6	5.1	10	0	0	-0.5	2.37	0.191	-1.7	0.4	0	0	0
ENSG00000120889	TNFRSF10B	tumor necrosis factor receptor superfamily, member 10b	plasma membrane|integral component of membrane|	apoptotic process|apoptotic process|activation of cysteine-type endopeptidase activity involved in apoptotic process|cell surface receptor signaling pathway|activation of NF-kappaB-inducing kinase activity|extrinsic apoptotic signaling pathway via death domain receptors|response to endoplasmic reticulum stress|regulation of apoptotic process|positive regulation of I-kappaB kinase/NF-kappaB signal…	receptor activity|protein binding|TRAIL binding|	10	0.3	2.4	10	0.2	0.25	0.3	2.37	0.191	-1.7	1	0	0	0
ENSG00000141934	PPAP2C	phosphatidic acid phosphatase type 2C	plasma membrane|membrane|integral component of membrane|	sphingolipid metabolic process|dephosphorylation|dephosphorylation|sphingolipid biosynthetic process|small molecule metabolic process|	phosphoprotein phosphatase activity|phosphatidate phosphatase activity|	10	-0.6	3.15	10	-0.1	0.115	-0.5	2.36	0.191	-1.7	0.3	0	0	0
ENSG00000079950	STX7	syntaxin 7	lysosomal membrane|integral component of membrane|SNARE complex|early endosome membrane|intracellular membrane-bounded organelle|perinuclear region of cytoplasm|extracellular vesicular exosome|	intracellular protein transport|post-Golgi vesicle-mediated transport|synaptic vesicle exocytosis|	SNARE binding|SNARE binding|SNAP receptor activity|	10	0.6	4.87	10	0	0	0.6	2.36	0.191	-0.3	1.7	0	0	0
ENSG00000205328	OR6C65	olfactory receptor, family 6, subfamily C, member 65	plasma membrane|integral component of membrane|	G-protein coupled receptor signaling pathway|detection of chemical stimulus involved in sensory perception of smell|	G-protein coupled receptor activity|olfactory receptor activity|	10	-1.3	2.75	10	-0.6	1.86	-1.1	2.35	0.192	-2	0.1	0	0	0
ENSG00000120322	PCDHB8	protocadherin beta 8	plasma membrane|integral component of membrane|	homophilic cell adhesion|	calcium ion binding|	10	-0.9	3.42	10	-0.2	0.343	-0.6	2.35	0.192	-1.9	0.2	0	0	0
ENSG00000258555	SPECC1L-ADORA2A	SPECC1L-ADORA2A readthrough (NMD candidate)	None	None	None	9	-0.3	2.27	9	0.2	1.03	-0.3	2.35	0.192	-1.6	0.7	0	0	0
ENSG00000158748	HTR6	5-hydroxytryptamine (serotonin) receptor 6, G protein-coupled	plasma membrane|integral component of plasma membrane|cilium|dendrite|	G-protein coupled receptor signaling pathway, coupled to cyclic nucleotide second messenger|serotonin receptor signaling pathway|synaptic transmission|brain development|learning|negative regulation of glutamate secretion|negative regulation of gamma-aminobutyric acid secretion|positive regulation of gamma-aminobutyric acid secretion|negative regulation of acetylcholine secretion, neurotransmissio…	histamine receptor activity|serotonin receptor activity|protein binding|	10	-0.2	0.82	10	-0.5	2.5	-0.4	2.34	0.193	-1.6	0.4	0	0	0
ENSG00000232258	TMEM114	transmembrane protein 114	plasma membrane|integral component of membrane|	None	None	10	0.2	0.94	10	0.3	1.79	0.2	2.34	0.193	-1.1	1.4	0	0	0
ENSG00000169758	C15ORF27	chromosome 15 open reading frame 27	plasma membrane|integral component of membrane|	calcium ion import|membrane depolarization during action potential|	voltage-gated calcium channel activity|	10	-0.8	2.2	10	0.6	3.69	-0.2	2.34	0.193	-1.7	1.4	0	0	0
ENSG00000065325	GLP2R	glucagon-like peptide 2 receptor	plasma membrane|integral component of membrane|	adenylate cyclase-modulating G-protein coupled receptor signaling pathway|positive regulation of cell proliferation|cellular response to glucagon stimulus|	G-protein coupled receptor activity|glucagon receptor activity|	10	0.6	3.39	10	-0.4	3.17	-0.3	2.33	0.194	-0.9	1.6	0	0	0
ENSG00000118777	ABCG2	ATP-binding cassette, sub-family G (WHITE), member 2	plasma membrane|integral component of membrane|mitochondrial membrane|	ATP catabolic process|transport|drug transmembrane transport|cellular iron ion homeostasis|heme transport|response to drug|xenobiotic transport|small molecule metabolic process|urate metabolic process|transmembrane transport|	transporter activity|protein binding|ATP binding|xenobiotic-transporting ATPase activity|heme transporter activity|ATPase activity, coupled to transmembrane movement of substances|protein homodimerization activity|	10	-0.2	0.411	10	-0.3	2.11	-0.3	2.33	0.194	-1.4	0.8	0	0	0
ENSG00000172146	OR1A1	olfactory receptor, family 1, subfamily A, member 1	plasma membrane|integral component of membrane|	G-protein coupled receptor signaling pathway|detection of chemical stimulus involved in sensory perception of smell|	G-protein coupled receptor activity|olfactory receptor activity|	10	0.3	3.58	10	0.1	0.0253	0.2	2.33	0.194	-0.6	1.4	0	0	0
ENSG00000154165	GPR15	G protein-coupled receptor 15	integral component of plasma membrane|	G-protein coupled receptor signaling pathway|	G-protein coupled receptor activity|	10	-0.7	1.17	10	0.5	2.73	0.4	2.33	0.194	-1.3	1.5	0	0	0
ENSG00000137145	DENND4C	DENN/MADD domain containing 4C	cytosol|plasma membrane|cytoplasmic vesicle membrane|insulin-responsive compartment|	protein transport|positive regulation of Rab GTPase activity|cellular response to insulin stimulus|protein localization to plasma membrane|	Rab guanyl-nucleotide exchange factor activity|	10	-0.7	5.32	10	0.8	1.77	-0.6	2.33	0.194	-1.9	1.2	0	0	0
ENSG00000198838	RYR3	ryanodine receptor 3	integral component of membrane|junctional membrane complex|sarcoplasmic reticulum membrane|sarcoplasmic reticulum membrane|perinuclear region of cytoplasm|	calcium ion transport|striated muscle contraction|ion transmembrane transport|protein homotetramerization|negative regulation of cytosolic calcium ion concentration|transmembrane transport|calcium ion transmembrane transport|cellular response to calcium ion|cellular response to magnesium ion|cellular response to caffeine|cellular response to ATP|	ryanodine-sensitive calcium-release channel activity|ryanodine-sensitive calcium-release channel activity|calcium ion binding|calmodulin binding|calcium-release channel activity|calcium-induced calcium release activity|	10	0.1	0.443	10	0.4	3.03	0.3	2.32	0.195	-0.9	1.5	0	0	0
ENSG00000169208	OR10G3	olfactory receptor, family 10, subfamily G, member 3	plasma membrane|integral component of membrane|	G-protein coupled receptor signaling pathway|detection of chemical stimulus involved in sensory perception of smell|	G-protein coupled receptor activity|olfactory receptor activity|	10	-0.6	5.31	10	0.1	0.448	-0.6	2.31	0.196	-1.8	0.4	0	0	0
ENSG00000179915	NRXN1	neurexin 1	plasma membrane|plasma membrane|integral component of plasma membrane|cell surface|cell surface|integral component of membrane|cell junction|endocytic vesicle|presynaptic membrane|presynaptic membrane|axonal growth cone|	angiogenesis|heterophilic cell-cell adhesion|neuron cell-cell adhesion|neuron cell-cell adhesion|synaptic transmission|neurotransmitter secretion|axon guidance|synapse assembly|learning|calcium-dependent cell-cell adhesion|cerebellar granule cell differentiation|neuronal signal transduction|extracellular matrix organization|adult behavior|social behavior|protein localization to synapse|vocal lear…	receptor activity|receptor binding|calcium channel regulator activity|calcium ion binding|protein binding|acetylcholine receptor binding|metal ion binding|calcium-dependent protein binding|cell adhesion molecule binding|neuroligin family protein binding|	10	0.4	2.32	10	0.1	0.837	0.2	2.31	0.196	-0.4	1.6	0	0	0
ENSG00000171014	OR4D5	olfactory receptor, family 4, subfamily D, member 5	plasma membrane|integral component of membrane|	G-protein coupled receptor signaling pathway|detection of chemical stimulus involved in sensory perception of smell|	G-protein coupled receptor activity|olfactory receptor activity|	10	-0.8	3.95	10	0.7	2.91	0.5	2.31	0.196	-1.7	1.5	0	0	0
ENSG00000128310	GALR3	galanin receptor 3	plasma membrane|integral component of membrane|	adenylate cyclase-inhibiting G-protein coupled receptor signaling pathway|negative regulation of adenylate cyclase activity|neuropeptide signaling pathway|synaptic transmission|learning or memory|feeding behavior|positive regulation of transcription from RNA polymerase II promoter|	galanin receptor activity|peptide hormone binding|	10	-0.1	0.421	10	-0.3	2.19	-0.2	2.3	0.197	-1	1.6	0	0	0
ENSG00000135063	FAM189A2	family with sequence similarity 189, member A2	cellular_component|integral component of membrane|	biological_process|	molecular_function|	10	0.4	2.37	10	0.1	0.997	0.4	2.3	0.197	-0.4	1.6	0	0	0
ENSG00000135956	TMEM127	transmembrane protein 127	cytoplasm|plasma membrane|integral component of membrane|	negative regulation of cell proliferation|negative regulation of TOR signaling|	molecular_function|	10	-1.1	3.14	10	0.1	0.54	-0.7	2.3	0.197	-1.9	0.2	0	0	0
ENSG00000116299	KIAA1324	KIAA1324	lysosome|lysosomal membrane|late endosome|trans-Golgi network|integral component of plasma membrane|late endosome membrane|extracellular vesicular exosome|	cellular response to starvation|macroautophagy|positive regulation of vacuole organization|positive regulation of autophagic vacuole assembly|negative regulation of extrinsic apoptotic signaling pathway in absence of ligand|	molecular_function|poly(A) RNA binding|	10	-0.3	1.52	10	-0.3	0.945	-0.3	2.3	0.197	-1.4	0.7	0	0	0
ENSG00000013588	GPRC5A	G protein-coupled receptor, class C, group 5, member A	plasma membrane|integral component of plasma membrane|cytoplasmic vesicle membrane|intracellular membrane-bounded organelle|extracellular vesicular exosome|	signal transduction|G-protein coupled receptor signaling pathway|	G-protein coupled receptor activity|	10	-0.3	1.51	10	0.5	3.71	0.4	2.29	0.198	-1.1	1.4	0	0	0
ENSG00000133135	RNF128	ring finger protein 128, E3 ubiquitin protein ligase	late endosome|endoplasmic reticulum|Golgi apparatus|cytoskeleton|integral component of membrane|perinuclear region of cytoplasm|	protein ubiquitination|negative regulation of cytokine biosynthetic process|	ubiquitin-protein transferase activity|zinc ion binding|ligase activity|	10	-0.2	1.48	10	-0.2	0.98	-0.2	2.29	0.198	-1.4	0.8	0	0	0
ENSG00000179934	CCR8	chemokine (C-C motif) receptor 8	plasma membrane|integral component of plasma membrane|	chemotaxis|immune response|cell adhesion|G-protein coupled receptor signaling pathway|positive regulation of cytosolic calcium ion concentration|chemokine-mediated signaling pathway|chemokine-mediated signaling pathway|	chemokine receptor activity|coreceptor activity|C-C chemokine receptor activity|	10	-0.3	1.35	10	-0.2	1.2	-0.2	2.28	0.199	-1.5	0.6	0	0	0
ENSG00000134250	NOTCH2	notch 2	Golgi membrane|extracellular region|nucleus|nucleoplasm|endoplasmic reticulum membrane|plasma membrane|integral component of plasma membrane|cell surface|membrane|receptor complex|	in utero embryonic development|cell fate determination|morphogenesis of an epithelial sheet|inflammatory response to antigenic stimulus|pulmonary valve morphogenesis|regulation of transcription, DNA-templated|transcription initiation from RNA polymerase II promoter|apoptotic process|humoral immune response|cell cycle arrest|Notch signaling pathway|Notch receptor processing|multicellular organisma…	receptor activity|calcium ion binding|protein binding|ligand-activated RNA polymerase II transcription factor binding transcription factor activity|	10	-0.4	4.62	10	0.3	1.51	-0.3	2.27	0.2	-1.5	0.9	0	0	0
ENSG00000081237	PTPRC	protein tyrosine phosphatase, receptor type, C	plasma membrane|integral component of plasma membrane|focal adhesion|external side of plasma membrane|membrane|membrane raft|extracellular vesicular exosome|	negative regulation of T cell mediated cytotoxicity|negative regulation of cytokine-mediated signaling pathway|hematopoietic progenitor cell differentiation|immunoglobulin biosynthetic process|negative regulation of protein kinase activity|negative regulation of protein kinase activity|protein dephosphorylation|negative regulation of cell adhesion involved in substrate-bound cell migration|cell s…	protein tyrosine phosphatase activity|transmembrane receptor protein tyrosine phosphatase activity|protein binding|protein kinase binding|	10	-0.2	0.818	10	-0.3	1.63	-0.2	2.27	0.2	-1.4	0.8	0	0	0
ENSG00000135392	DNAJC14	DnaJ (Hsp40) homolog, subfamily C, member 14	endoplasmic reticulum membrane|membrane|integral component of membrane|extracellular vesicular exosome|	protein transport|	None	10	0	0	10	0.4	4.57	0.3	2.27	0.2	-0.6	1.6	0	0	0
ENSG00000111843	TMEM14C	transmembrane protein 14C	integral component of membrane|mitochondrial membrane|	heme biosynthetic process|	None	10	-0.3	1.6	10	0.7	4.05	-0.2	2.26	0.201	-0.9	1.8	0	0	0
ENSG00000162692	VCAM1	vascular cell adhesion molecule 1	podosome|extracellular space|early endosome|endoplasmic reticulum|Golgi apparatus|plasma membrane|microvillus|external side of plasma membrane|cell surface|integral component of membrane|filopodium|sarcolemma|apical part of cell|extracellular vesicular exosome|alpha9-beta1 integrin-vascular cell adhesion molecule-1 complex|	response to hypoxia|acute inflammatory response|chronic inflammatory response|cell adhesion|heterophilic cell-cell adhesion|leukocyte cell-cell adhesion|heart development|aging|response to nutrient|amine metabolic process|response to zinc ion|response to ionizing radiation|viral process|cytokine-mediated signaling pathway|membrane to membrane docking|B cell differentiation|extracellular matrix or…	integrin binding|integrin binding|primary amine oxidase activity|cell adhesion molecule binding|cell adhesion molecule binding|	10	0.4	1.97	10	-0.9	1.9	-0.8	2.26	0.201	-1.9	0.6	0	0	0
ENSG00000140391	TSPAN3	tetraspanin 3	integral component of membrane|extracellular vesicular exosome|	biological_process|	molecular_function|	10	-0.5	3.6	10	0	0	-0.4	2.26	0.201	-1.6	0.5	0	0	0
ENSG00000164199	GPR98	G protein-coupled receptor 98	stereocilia ankle link complex|cytoplasm|plasma membrane|cell surface|membrane|integral component of membrane|receptor complex|extracellular vesicular exosome|	G-protein coupled receptor signaling pathway|neuropeptide signaling pathway|nervous system development|visual perception|sensory perception of sound|single organismal cell-cell adhesion|photoreceptor cell maintenance|maintenance of organ identity|neurological system process|detection of mechanical stimulus involved in sensory perception of sound|sensory perception of light stimulus|inner ear rece…	G-protein coupled receptor activity|calcium ion binding|protein binding|myosin binding|	10	1	5.48	10	-0.3	2.39	1	2.25	0.202	-0.5	1.9	0	0	0
ENSG00000120907	ADRA1A	adrenoceptor alpha 1A	nucleus|plasma membrane|integral component of plasma membrane|Z disc|T-tubule|nuclear membrane|	negative regulation of heart rate involved in baroreceptor response to increased systemic arterial blood pressure|norepinephrine-epinephrine vasoconstriction involved in regulation of systemic arterial blood pressure|positive regulation of heart rate by epinephrine-norepinephrine|positive regulation of the force of heart contraction by epinephrine-norepinephrine|positive regulation of systemic ar…	alpha1-adrenergic receptor activity|alpha1-adrenergic receptor activity|alpha1-adrenergic receptor activity|protein heterodimerization activity|	10	0.3	2.2	10	0.1	0.36	0.2	2.24	0.203	-0.8	1.4	0	0	0
ENSG00000137462	TLR2	toll-like receptor 2	cytoplasm|plasma membrane|plasma membrane|integral component of plasma membrane|external side of plasma membrane|cell surface|Toll-like receptor 1-Toll-like receptor 2 protein complex|Toll-like receptor 2-Toll-like receptor 6 protein complex|cell projection|cell body|	response to hypoxia|toll-like receptor signaling pathway|response to molecule of fungal origin|microglial cell activation involved in immune response|positive regulation of leukocyte migration|cell surface pattern recognition receptor signaling pathway|MyD88-dependent toll-like receptor signaling pathway|leukotriene metabolic process|apoptotic process|inflammatory response|immune response|signal …	lipopolysaccharide receptor activity|receptor activity|transmembrane signaling receptor activity|protein binding|signaling pattern recognition receptor activity|triacyl lipopeptide binding|diacyl lipopeptide binding|peptidoglycan binding|protein heterodimerization activity|lipoteichoic acid binding|	10	-0.9	5.18	10	0	0	-0.9	2.23	0.204	-2	0.1	0	0	0
ENSG00000157399	ARSE	arylsulfatase E (chondrodysplasia punctata 1)	endoplasmic reticulum lumen|Golgi stack|extracellular vesicular exosome|	skeletal system development|sphingolipid metabolic process|glycosphingolipid metabolic process|post-translational protein modification|cellular protein metabolic process|small molecule metabolic process|	arylsulfatase activity|metal ion binding|	10	0.4	2.69	10	0.1	0.185	0.3	2.23	0.204	-0.4	1.5	0	0	0
ENSG00000163701	IL17RE	interleukin 17 receptor E	extracellular region|cytoplasm|plasma membrane|integral component of membrane|	inflammatory response|	protein binding|	10	-0.3	1.9	10	-0.7	1.91	-0.4	2.22	0.205	-1.7	0.3	0	0	0
ENSG00000165186	PTCHD1	patched domain containing 1	plasma membrane|integral component of membrane|	smoothened signaling pathway|cognition|	molecular_function|hedgehog receptor activity|	10	0.2	2.13	10	0.1	0.459	0.2	2.22	0.205	-1	1.3	0	0	0
ENSG00000144063	MALL	mal, T-cell differentiation protein-like	Golgi membrane|plasma membrane|integral component of membrane|cytoplasmic membrane-bounded vesicle|clathrin-coated vesicle|membrane raft|	cholesterol homeostasis|	protein binding|	10	0.5	0.925	10	-1.3	3.6	0.4	2.22	0.205	-2	1.1	0	0	0
ENSG00000205045	SLFN12L	schlafen family member 12-like	integral component of membrane|	None	ATP binding|	10	-0.3	1.45	10	-0.7	2.51	-0.3	2.21	0.206	-1.8	0.2	0	0	0
ENSG00000146842	TMEM209	transmembrane protein 209	integral component of membrane|	None	None	10	0.6	1.33	10	-0.4	1.89	-0.2	2.21	0.206	-1.3	1.4	0	0	0
ENSG00000240403	KIR3DL2	killer cell immunoglobulin-like receptor, three domains, long cytoplasmic tail, 2	plasma membrane|integral component of plasma membrane|	cellular defense response|regulation of immune response|	None	10	-0.1	0.386	10	-0.4	2.99	-0.2	2.21	0.206	-1.5	0.4	0	0	0
ENSG00000135218	CD36	CD36 molecule (thrombospondin receptor)	extracellular space|Golgi apparatus|plasma membrane|plasma membrane|integral component of plasma membrane|external side of plasma membrane|cell surface|cell surface|membrane|endocytic vesicle membrane|platelet alpha granule membrane|membrane raft|phagocytic vesicle|	negative regulation of transcription from RNA polymerase II promoter|positive regulation of cell-matrix adhesion|toll-like receptor signaling pathway|antigen processing and presentation of peptide antigen via MHC class I|antigen processing and presentation of exogenous peptide antigen via MHC class I, TAP-dependent|platelet degranulation|MyD88-dependent toll-like receptor signaling pathway|lipid …	low-density lipoprotein receptor activity|low-density lipoprotein receptor activity|high-density lipoprotein particle binding|lipid binding|low-density lipoprotein particle binding|transforming growth factor beta binding|thrombospondin receptor activity|lipoteichoic acid receptor activity|lipoprotein particle binding|	10	0.3	0.902	10	1.3	4.52	1.3	2.21	0.206	-0.2	2	0	0	0
ENSG00000112494	UNC93A	unc-93 homolog A (C. elegans)	plasma membrane|integral component of membrane|	biological_process|	molecular_function|	10	-0.4	4.23	10	0	0	-0.3	2.2	0.207	-1.5	0.5	0	0	0
ENSG00000221996	OR52B4	olfactory receptor, family 52, subfamily B, member 4	plasma membrane|integral component of membrane|	G-protein coupled receptor signaling pathway|cognition|detection of chemical stimulus involved in sensory perception of smell|	G-protein coupled receptor activity|olfactory receptor activity|	10	-0.3	2.07	10	-1.5	3.17	-1.4	2.2	0.207	-2.8	0	0	0	0
ENSG00000140688	C16ORF58	chromosome 16 open reading frame 58	membrane|integral component of membrane|	None	None	10	-0.4	4.68	10	0	0	-0.4	2.19	0.208	-1.5	0.4	0	0	0
ENSG00000167286	CD3D	CD3d molecule, delta (CD3-TCR complex)	cytoplasm|plasma membrane|integral component of membrane|T cell receptor complex|T cell receptor complex|alpha-beta T cell receptor complex|	cell surface receptor signaling pathway|T cell differentiation|T cell costimulation|positive thymic T cell selection|positive regulation of transcription from RNA polymerase II promoter|regulation of immune response|T cell receptor signaling pathway|	transcription coactivator activity|transmembrane signaling receptor activity|protein heterodimerization activity|	10	0.3	1.28	10	0.3	1.08	0.3	2.19	0.208	-0.5	1.6	0	0	0
ENSG00000138613	APH1B	APH1B gamma secretase subunit	plasma membrane|integral component of membrane|transport vesicle|	Notch signaling pathway|Notch receptor processing|protein processing|membrane protein intracellular domain proteolysis|positive regulation of apoptotic process|positive regulation of catalytic activity|neurotrophin TRK receptor signaling pathway|apoptotic signaling pathway|	protein binding|peptidase activity|	10	-0.6	1.38	10	0.5	2	0.2	2.19	0.208	-1.3	1.4	0	0	0
ENSG00000175143	OR2T1	olfactory receptor, family 2, subfamily T, member 1	plasma membrane|integral component of membrane|	G-protein coupled receptor signaling pathway|detection of chemical stimulus involved in sensory perception of smell|	G-protein coupled receptor activity|olfactory receptor activity|	10	-0.4	3.38	10	-0.1	0.213	-0.4	2.18	0.209	-1.3	1.1	0	0	0
ENSG00000186440	OR6P1	olfactory receptor, family 6, subfamily P, member 1	plasma membrane|integral component of membrane|	G-protein coupled receptor signaling pathway|detection of chemical stimulus involved in sensory perception of smell|	G-protein coupled receptor activity|olfactory receptor activity|	10	0.2	3.24	10	-0.2	0.704	0.2	2.18	0.209	-1	1.2	0	0	0
ENSG00000170632	ARMC10	armadillo repeat containing 10	mitochondrion|endoplasmic reticulum membrane|integral component of membrane|	regulation of growth|	None	10	-0.3	2.89	10	0.1	0.483	-0.3	2.17	0.21	-1.5	0.9	0	0	0
ENSG00000159147	DONSON	downstream neighbor of SON	cellular_component|nucleus|	multicellular organismal development|biological_process|	molecular_function|	5	0.6	2.45	5	0.2	0.872	0.3	2.17	0.21	-0.7	2	0	0	0
ENSG00000117400	MPL	MPL proto-oncogene, thrombopoietin receptor	plasma membrane|plasma membrane|integral component of plasma membrane|	cell surface receptor signaling pathway|blood coagulation|cell proliferation|cytokine-mediated signaling pathway|platelet activation|regulation of chemokine production|homeostasis of number of cells|	transmembrane signaling receptor activity|cytokine receptor activity|	10	0.6	3.52	10	-1	0.298	0.5	2.17	0.21	-1.7	1.5	0	0	0
ENSG00000111261	MANSC1	MANSC domain containing 1	integral component of membrane|	None	None	10	-0.3	2.01	10	-0.5	0.563	-0.3	2.16	0.211	-1.5	0.5	0	0	0
ENSG00000262209	PCDHGB3	protocadherin gamma subfamily B, 3	plasma membrane|integral component of membrane|	homophilic cell adhesion|	calcium ion binding|	5	-0.2	1.17	5	-0.5	1.4	-0.3	2.16	0.211	-2	0.7	0	0	0
ENSG00000166603	MC4R	melanocortin 4 receptor	nucleus|plasma membrane|integral component of membrane|	diet induced thermogenesis|energy reserve metabolic process|adenylate cyclase-modulating G-protein coupled receptor signaling pathway|feeding behavior|insulin secretion|positive regulation of cAMP biosynthetic process|response to insulin|positive regulation of bone resorption|negative regulation of feeding behavior|regulation of grooming behavior|	melanocortin receptor activity|melanocyte-stimulating hormone receptor activity|protein binding|peptide hormone binding|ubiquitin protein ligase binding|neuropeptide binding|	10	-0.2	0.374	10	-0.6	3.09	-0.4	2.15	0.212	-1.7	0.7	0	0	0
ENSG00000162951	LRRTM1	leucine rich repeat transmembrane neuronal 1	endoplasmic reticulum|integral component of membrane|cell junction|axon|growth cone|postsynaptic membrane|excitatory synapse|	locomotory behavior|biological_process|protein localization to synapse|exploration behavior|synapse organization|	molecular_function|	10	-0.2	0.631	10	-0.3	1.71	-0.3	2.15	0.212	-1.6	0.3	0	0	0
ENSG00000110108	TMEM109	transmembrane protein 109	nuclear outer membrane|integral component of membrane|sarcoplasmic reticulum membrane|extracellular vesicular exosome|	intrinsic apoptotic signaling pathway in response to DNA damage by p53 class mediator|negative regulation of cell death|cellular response to gamma radiation|	molecular_function|	10	0.3	3.22	10	-0.2	0.0552	0.3	2.15	0.212	-1.1	1.5	0	0	0
ENSG00000109163	GNRHR	gonadotropin-releasing hormone receptor	plasma membrane|integral component of plasma membrane|membrane|	G-protein coupled receptor signaling pathway|multicellular organismal development|cellular response to gonadotropin-releasing hormone|cellular response to gonadotropin-releasing hormone|	gonadotropin-releasing hormone receptor activity|	10	-0.9	1.15	10	-1	1.39	-1	2.14	0.214	-2	0.3	0	0	0
ENSG00000170255	MRGPRX1	MAS-related GPR, member X1	plasma membrane|integral component of membrane|	acute-phase response|G-protein coupled receptor signaling pathway|	G-protein coupled receptor activity|	10	-0.7	4.35	10	0	0	-0.7	2.14	0.214	-1.9	0.2	0	0	0
ENSG00000173612	GPRC6A	G protein-coupled receptor, class C, group 6, member A	plasma membrane|cell surface|integral component of membrane|	G-protein coupled receptor signaling pathway|calcium-mediated signaling|response to amino acid|	G-protein coupled receptor activity|	10	0.2	0.349	10	0.7	3.28	0.4	2.14	0.214	-0.5	1.8	0	0	0
ENSG00000175606	TMEM70	transmembrane protein 70	mitochondrial inner membrane|integral component of mitochondrial membrane|	mitochondrial proton-transporting ATP synthase complex assembly|	molecular_function|	10	-0.5	1.33	10	1	5.5	1	2.14	0.214	-0.8	2	0	0	0
ENSG00000050628	PTGER3	prostaglandin E receptor 3 (subtype EP3)	nuclear envelope|plasma membrane|integral component of plasma membrane|integral component of membrane|	transcription, DNA-templated|G-protein coupled receptor signaling pathway|cell death|intracellular receptor signaling pathway|positive regulation of fever generation|	ligand-activated sequence-specific DNA binding RNA polymerase II transcription factor activity|prostaglandin E receptor activity|	10	0.3	1.39	10	-0.8	4.36	0.2	2.14	0.214	-1.8	0.7	0	0	0
ENSG00000153214	TMEM87B	transmembrane protein 87B	integral component of membrane|	None	None	10	0	0	10	0.4	3.6	0.4	2.13	0.215	-0.7	1.5	0	0	0
ENSG00000154978	VOPP1	vesicular, overexpressed in cancer, prosurvival protein 1	endosome|cytoplasmic vesicle membrane|integral component of organelle membrane|	transcription, DNA-templated|regulation of transcription, DNA-templated|signal transduction|	signal transducer activity|	10	-0.7	1.03	10	-0.3	1.43	-0.4	2.13	0.215	-1.7	0.4	0	0	0
ENSG00000175471	MCTP1	multiple C2 domains, transmembrane 1	integral component of membrane|	calcium-mediated signaling|	calcium ion binding|	10	-0.8	2.37	10	0.1	0.121	0.2	2.12	0.216	-1.8	0.7	0	0	0
ENSG00000114529	C3ORF52	chromosome 3 open reading frame 52	endoplasmic reticulum membrane|integral component of membrane|	None	None	10	0.1	0.279	10	-1.1	3.72	-0.3	2.12	0.216	-1.9	0.2	0	0	0
ENSG00000169618	PROKR1	prokineticin receptor 1	plasma membrane|integral component of membrane|	neuropeptide signaling pathway|negative regulation of apoptotic process|	neuropeptide Y receptor activity|	10	-0.4	3.2	10	0.6	2.13	-0.3	2.12	0.216	-1.3	1.4	0	0	0
ENSG00000142511	GPR32	G protein-coupled receptor 32	integral component of plasma membrane|	G-protein coupled receptor signaling pathway|	G-protein coupled receptor activity|	10	-0.2	1.84	10	-0.3	0.547	-0.2	2.12	0.216	-1.4	0.8	0	0	0
ENSG00000172519	OR10H5	olfactory receptor, family 10, subfamily H, member 5	plasma membrane|integral component of membrane|	G-protein coupled receptor signaling pathway|detection of chemical stimulus involved in sensory perception of smell|	G-protein coupled receptor activity|olfactory receptor activity|	10	-0.9	1.75	10	-0.2	1.68	-0.2	2.11	0.217	-1.9	0.3	0	0	0
ENSG00000196266	OR10J3	olfactory receptor, family 10, subfamily J, member 3	plasma membrane|integral component of membrane|	G-protein coupled receptor signaling pathway|detection of chemical stimulus involved in sensory perception of smell|	G-protein coupled receptor activity|olfactory receptor activity|	10	-0.8	2.57	10	-0.1	0.55	-0.2	2.11	0.217	-1.9	0.7	0	0	0
ENSG00000170920	OR7G3	olfactory receptor, family 7, subfamily G, member 3	plasma membrane|integral component of membrane|	G-protein coupled receptor signaling pathway|detection of chemical stimulus involved in sensory perception of smell|	G-protein coupled receptor activity|olfactory receptor activity|	10	0.4	3.71	10	-1.4	5.44	-1.4	2.1	0.217	-2	0.7	0	0	0
ENSG00000139173	TMEM117	transmembrane protein 117	endoplasmic reticulum|integral component of membrane|	biological_process|	molecular_function|	10	-0.3	1.33	10	-0.9	1.9	-0.4	2.09	0.218	-1.9	0.2	0	0	0
ENSG00000150627	WDR17	WD repeat domain 17	None	None	None	10	0.1	0.104	10	0.2	2.59	0.2	2.09	0.218	-0.7	1.6	0	0	0
ENSG00000198128	OR2L3	olfactory receptor, family 2, subfamily L, member 3	plasma membrane|integral component of membrane|	G-protein coupled receptor signaling pathway|biological_process|detection of chemical stimulus involved in sensory perception of smell|	molecular_function|G-protein coupled receptor activity|olfactory receptor activity|	10	-0.2	0.705	10	-0.3	1.56	-0.3	2.09	0.218	-1.4	0.7	0	0	0
ENSG00000104921	FCER2	Fc fragment of IgE, low affinity II, receptor for (CD23)	plasma membrane|integral component of plasma membrane|external side of plasma membrane|extracellular vesicular exosome|	positive regulation of humoral immune response mediated by circulating immunoglobulin|Notch signaling pathway|positive regulation of nitric-oxide synthase activity|positive regulation of killing of cells of other organism|positive regulation of nitric-oxide synthase biosynthetic process|	integrin binding|IgE binding|carbohydrate binding|metal ion binding|	10	-0.9	2.85	10	-0.1	0.256	-0.6	2.09	0.218	-2	0.2	0	0	0
ENSG00000138039	LHCGR	luteinizing hormone/choriogonadotropin receptor	endosome|plasma membrane|integral component of plasma membrane|	ovarian follicle development|G-protein coupled receptor signaling pathway|G-protein coupled receptor signaling pathway, coupled to cyclic nucleotide second messenger|activation of adenylate cyclase activity|phospholipase C-activating G-protein coupled receptor signaling pathway|spermatogenesis|male gonad development|male genitalia development|positive regulation of inositol trisphosphate biosynth…	luteinizing hormone receptor activity|choriogonadotropin hormone receptor activity|choriogonadotropin hormone binding|	10	0.1	0.116	10	-1.2	5.01	-1.2	2.09	0.218	-2	0.2	0	0	0
ENSG00000177535	OR2B11	olfactory receptor, family 2, subfamily B, member 11	plasma membrane|integral component of membrane|	G-protein coupled receptor signaling pathway|detection of chemical stimulus involved in sensory perception of smell|	G-protein coupled receptor activity|olfactory receptor activity|	9	-0.1	0.0387	9	-1.3	5.06	-1.3	2.09	0.218	-2	0.5	0	0	0
ENSG00000170417	TMEM182	transmembrane protein 182	integral component of membrane|	None	None	10	-0.9	1.6	10	-0.2	1.58	-0.2	2.08	0.219	-1.5	1.7	0	0	0
ENSG00000010270	STARD3NL	STARD3 N-terminal like	lysosomal membrane|membrane|integral component of membrane|late endosome membrane|	None	None	10	-0.4	2.83	10	-0.1	0.111	-0.3	2.08	0.219	-1.5	0.7	0	0	0
ENSG00000172348	RCAN2	regulator of calcineurin 2	cellular_component|	calcium-mediated signaling|	nucleotide binding|	10	-0.5	0.305	10	0.3	2.07	0.3	2.08	0.219	-1.3	1.2	0	0	0
ENSG00000105677	TMEM147	transmembrane protein 147	endoplasmic reticulum membrane|integral component of membrane|	None	None	10	-0.3	1.5	10	-0.6	1.43	-0.6	2.08	0.219	-1.7	0.4	0	0	0
ENSG00000172487	OR8J1	olfactory receptor, family 8, subfamily J, member 1	plasma membrane|integral component of membrane|	G-protein coupled receptor signaling pathway|detection of chemical stimulus involved in sensory perception of smell|	G-protein coupled receptor activity|olfactory receptor activity|	10	-0.2	1.6	10	-0.1	0.682	-0.2	2.08	0.219	-1.5	0.6	0	0	0
ENSG00000186723	OR10H1	olfactory receptor, family 10, subfamily H, member 1	plasma membrane|integral component of membrane|	G-protein coupled receptor signaling pathway|detection of chemical stimulus involved in sensory perception of smell|	G-protein coupled receptor activity|olfactory receptor activity|	10	-0.3	2.65	10	0	0	-0.3	2.08	0.219	-1.6	0.5	0	0	0
ENSG00000117500	TMED5	transmembrane emp24 protein transport domain containing 5	endoplasmic reticulum membrane|endoplasmic reticulum-Golgi intermediate compartment|Golgi apparatus|cis-Golgi network|integral component of membrane|endoplasmic reticulum-Golgi intermediate compartment membrane|endoplasmic reticulum exit site|	protein transport|Golgi ribbon formation|	protein binding|	10	0.2	1.09	10	0.2	1.15	0.2	2.08	0.219	-0.5	1.6	0	0	0
ENSG00000163449	TMEM169	transmembrane protein 169	integral component of membrane|	None	None	10	-0.3	1.99	10	0.3	3.19	0.2	2.07	0.221	-1.1	1.2	0	0	0
ENSG00000178826	TMEM139	transmembrane protein 139	integral component of membrane|	None	None	10	-0.4	2.56	10	-0.1	0.384	-0.2	2.07	0.221	-1.5	0.6	0	0	0
ENSG00000010610	CD4	CD4 molecule	early endosome|endoplasmic reticulum lumen|endoplasmic reticulum membrane|plasma membrane|plasma membrane|external side of plasma membrane|integral component of membrane|T cell receptor complex|membrane raft|	cytokine production|induction by virus of host cell-cell fusion|immune response|cell adhesion|signal transduction|cell surface receptor signaling pathway|enzyme linked receptor protein signaling pathway|transmembrane receptor protein tyrosine kinase signaling pathway|viral process|T cell differentiation|entry into host cell|T cell costimulation|maintenance of protein location in cell|T cell selec…	glycoprotein binding|receptor activity|transmembrane signaling receptor activity|extracellular matrix structural constituent|protein binding|zinc ion binding|coreceptor activity|enzyme binding|protein kinase binding|MHC class II protein binding|protein homodimerization activity|	10	0.4	1.09	10	-0.5	2.65	-0.5	2.07	0.221	-1.5	0.9	0	0	0
ENSG00000204516	MICB	MHC class I polypeptide-related sequence B	plasma membrane|cell surface|integral component of membrane|	immune response-activating cell surface receptor signaling pathway|immune response|response to oxidative stress|response to heat|viral process|cytolysis|antigen processing and presentation|response to retinoic acid|gamma-delta T cell activation|negative regulation of defense response to virus by host|regulation of immune response|	natural killer cell lectin-like receptor binding|	10	-0.3	1.4	10	-0.7	0.953	-0.3	2.06	0.222	-1.7	0.5	0	0	0
ENSG00000118855	MFSD1	major facilitator superfamily domain containing 1	integral component of membrane|	transmembrane transport|	None	10	0.8	2.21	10	-0.4	1.83	-0.3	2.06	0.222	-1.1	1.7	0	0	0
ENSG00000119682	AREL1	apoptosis resistant E3 ubiquitin protein ligase 1	nucleus|cytoplasm|cytosol|	apoptotic process|protein ubiquitination involved in ubiquitin-dependent protein catabolic process|protein ubiquitination involved in ubiquitin-dependent protein catabolic process|negative regulation of apoptotic process|	ubiquitin-protein transferase activity|ubiquitin-protein transferase activity|ligase activity|	10	0.3	1.12	10	0.9	2.65	0.4	2.05	0.223	-0.2	1.9	0	0	0
ENSG00000139291	TMEM19	transmembrane protein 19	integral component of membrane|	None	None	9	-0.6	3.95	9	0.1	0.287	-0.5	2.05	0.223	-1.8	0.6	0	0	0
ENSG00000143183	TMCO1	transmembrane and coiled-coil domains 1	Golgi membrane|endoplasmic reticulum membrane|integral component of membrane|	None	None	10	0.2	0.66	10	0.2	1.54	0.2	2.05	0.223	-0.7	1.6	0	0	0
ENSG00000184160	ADRA2C	adrenoceptor alpha 2C	cytoplasm|endosome|plasma membrane|integral component of plasma membrane|axon terminus|	energy reserve metabolic process|G-protein coupled receptor signaling pathway|cell-cell signaling|female pregnancy|blood coagulation|negative regulation of norepinephrine secretion|negative regulation of norepinephrine secretion|platelet activation|activation of protein kinase B activity|negative regulation of epinephrine secretion|epidermal growth factor-activated receptor transactivation by G-p…	alpha2-adrenergic receptor activity|protein binding|alpha-2A adrenergic receptor binding|protein homodimerization activity|protein heterodimerization activity|epinephrine binding|	10	0	0	10	0.4	2.82	0.4	2.05	0.223	-0.8	1.5	0	0	0
ENSG00000212127	TAS2R14	taste receptor, type 2, member 14	plasma membrane|integral component of membrane|	detection of chemical stimulus involved in sensory perception of bitter taste|G-protein coupled receptor signaling pathway|	taste receptor activity|taste receptor activity|bitter taste receptor activity|	10	0.6	2.08	10	-0.3	1.86	-0.3	2.05	0.223	-1.4	1.3	0	0	0
ENSG00000150471	LPHN3	latrophilin 3	plasma membrane|integral component of membrane|	G-protein coupled receptor signaling pathway|neuropeptide signaling pathway|	G-protein coupled receptor activity|carbohydrate binding|	10	1.1	4.89	10	0.1	0.335	1	2.04	0.224	-0.1	2	0	0	0
ENSG00000010282	HHATL	hedgehog acyltransferase-like	endoplasmic reticulum|endoplasmic reticulum membrane|integral component of membrane|perinuclear region of cytoplasm|	negative regulation of N-terminal protein palmitoylation|	None	10	-0.3	0.223	10	-0.4	1.98	-0.4	2.04	0.224	-1.6	0.8	0	0	0
ENSG00000148719	DNAJB12	DnaJ (Hsp40) homolog, subfamily B, member 12	membrane|integral component of membrane|	None	None	10	-0.7	3.9	10	1	5.42	1	2.04	0.224	-1.2	2	0	0	0
ENSG00000099365	STX1B	syntaxin 1B	nucleus|cytoplasm|microtubule organizing center|spindle|integral component of plasma membrane|	transport|neurotransmitter transport|intracellular protein transport|synaptic transmission|vesicle-mediated transport|regulation of exocytosis|ion transmembrane transport|	SNARE binding|extracellular ligand-gated ion channel activity|extracellular-glutamate-gated ion channel activity|SNAP receptor activity|protein kinase binding|protein domain specific binding|	10	-0.2	0.626	10	-0.3	1.79	-0.2	2.04	0.224	-1.7	0.8	0	0	0
ENSG00000176231	OR10H4	olfactory receptor, family 10, subfamily H, member 4	plasma membrane|integral component of membrane|	G-protein coupled receptor signaling pathway|biological_process|detection of chemical stimulus involved in sensory perception of smell|	molecular_function|G-protein coupled receptor activity|olfactory receptor activity|	10	-0.1	0.279	10	0.3	3.01	0.2	2.03	0.225	-1.1	1.4	0	0	0
ENSG00000108622	ICAM2	intercellular adhesion molecule 2	uropod|plasma membrane|integral component of plasma membrane|membrane|extracellular vesicular exosome|	single organismal cell-cell adhesion|extracellular matrix organization|regulation of immune response|	integrin binding|	10	-0.3	1.72	10	-1	1.85	-0.3	2.03	0.225	-2	0.3	0	0	0
ENSG00000163444	TMEM183A	transmembrane protein 183A	integral component of membrane|	None	None	10	-0.4	2.02	10	0.2	1.56	-0.4	2.03	0.225	-1.5	0.8	0	0	0
ENSG00000204634	TBC1D8	TBC1 domain family, member 8 (with GRAM domain)	membrane|	blood circulation|positive regulation of cell proliferation|positive regulation of Rab GTPase activity|	Rab GTPase activator activity|calcium ion binding|	10	0.3	2.2	10	-0.3	1.73	-0.3	2.03	0.225	-1.6	0.9	0	0	0
ENSG00000168591	TMUB2	transmembrane and ubiquitin-like domain containing 2	integral component of membrane|	None	None	10	-1	1.08	10	-1.2	1.42	-1.1	2.02	0.227	-2	0.6	0	0	0
ENSG00000004866	ST7	suppression of tumorigenicity 7	integral component of membrane|	None	None	9	-0.2	0.964	9	0.3	2.38	0.3	2.02	0.227	-1.1	1.5	0	0	0
ENSG00000009790	TRAF3IP3	TRAF3 interacting protein 3	integral component of membrane|	None	protein binding|	10	-0.2	1.7	10	-0.2	0.464	-0.2	2.02	0.227	-1.4	1.2	0	0	0
ENSG00000166884	OR4D6	olfactory receptor, family 4, subfamily D, member 6	plasma membrane|integral component of membrane|	G-protein coupled receptor signaling pathway|detection of chemical stimulus involved in sensory perception of smell|	G-protein coupled receptor activity|olfactory receptor activity|	10	0.4	3.58	10	-0.1	0.551	0.3	2.02	0.227	-0.5	1.6	0	0	0
ENSG00000121871	SLITRK3	SLIT and NTRK-like family, member 3	integral component of membrane|	axonogenesis|	None	10	-0.4	3.06	10	0	0	-0.4	2.01	0.228	-1.8	0.5	0	0	0
ENSG00000170545	SMAGP	small cell adhesion glycoprotein	nucleus|plasma membrane|integral component of membrane|cell junction|cytoplasmic vesicle membrane|	None	None	10	-0.4	1.97	10	-0.1	0.388	-0.3	2	0.229	-1.6	0.4	0	0	0
ENSG00000261190	C16ORF97	chromosome 16 open reading frame 97	None	None	None	10	0.5	3.35	10	0.1	0.0229	0.4	2	0.229	-0.6	1.6	0	0	0
ENSG00000154639	CXADR	coxsackie virus and adenovirus receptor	acrosomal vesicle|extracellular region|extracellular space|nucleus|plasma membrane|plasma membrane|integral component of plasma membrane|cell-cell junction|adherens junction|tight junction|intercalated disc|intercalated disc|basolateral plasma membrane|apicolateral plasma membrane|cell junction|filopodium|growth cone|neuromuscular junction|neuron projection|protein complex|cell body|membrane raft|	mitochondrion organization|heterophilic cell-cell adhesion|heart development|blood coagulation|germ cell migration|response to virus|epithelial structure maintenance|viral process|single organismal cell-cell adhesion|neutrophil chemotaxis|actin cytoskeleton reorganization|homotypic cell-cell adhesion|cell-cell junction organization|gamma-delta T cell activation|cardiac muscle fiber development|re…	virus receptor activity|receptor binding|integrin binding|protein binding|beta-catenin binding|PDZ domain binding|identical protein binding|cell adhesion molecule binding|connexin binding|	10	0.2	1.84	10	0.8	0.456	0.7	2	0.229	-0.5	1.9	0	0	0
ENSG00000174004	NRROS	negative regulator of reactive oxygen species	endoplasmic reticulum|endoplasmic reticulum membrane|plasma membrane|integral component of membrane|	superoxide metabolic process|inflammatory response|immune response|innate immune response|	None	10	0.2	0.825	10	-0.5	1.68	-0.4	1.99	0.23	-1.5	0.8	0	0	0
ENSG00000026751	SLAMF7	SLAM family member 7	external side of plasma membrane|integral component of membrane|	cell adhesion|natural killer cell activation|regulation of natural killer cell activation|natural killer cell mediated cytotoxicity|	receptor activity|	10	-0.2	1.5	10	-0.1	0.842	-0.2	1.99	0.23	-1.5	0.7	0	0	0
ENSG00000239590	OR1J4	olfactory receptor, family 1, subfamily J, member 4	plasma membrane|integral component of membrane|	G-protein coupled receptor signaling pathway|detection of chemical stimulus involved in sensory perception of smell|	G-protein coupled receptor activity|olfactory receptor activity|	10	-0.3	2.83	10	0.8	3.6	-0.3	1.99	0.23	-1	1.8	0	0	0
ENSG00000250120	PCDHA10	protocadherin alpha 10	extracellular region|integral component of plasma membrane|	cell adhesion|homophilic cell adhesion|nervous system development|	calcium ion binding|	5	-0.1	0.0417	5	-0.5	2.74	-0.5	1.99	0.23	-2	0.7	0	0	0
ENSG00000134490	TMEM241	transmembrane protein 241	integral component of membrane|	None	None	10	-0.3	1.28	10	-0.3	0.866	-0.3	1.99	0.23	-1.5	0.8	0	0	0
ENSG00000081177	EXD2	exonuclease 3'-5' domain containing 2	None	nucleic acid phosphodiester bond hydrolysis|	nucleic acid binding|3'-5' exonuclease activity|	10	0.2	2.4	10	0	0	0.2	1.99	0.23	-0.8	1.5	0	0	0
ENSG00000115598	IL1RL2	interleukin 1 receptor-like 2	integral component of plasma membrane|	cellular defense response|signal transduction|cytokine-mediated signaling pathway|positive regulation of interleukin-6 production|positive regulation of T cell differentiation|regulation of inflammatory response|interleukin-1-mediated signaling pathway|	interleukin-1 receptor activity|interleukin-1, Type I, activating receptor activity|	10	-0.7	2.54	10	0	0	-0.8	1.99	0.23	-2	0.2	0	0	0
ENSG00000172320	OR5A1	olfactory receptor, family 5, subfamily A, member 1	plasma membrane|integral component of membrane|	G-protein coupled receptor signaling pathway|detection of chemical stimulus involved in sensory perception of smell|	G-protein coupled receptor activity|olfactory receptor activity|	10	0.3	0.73	10	-0.3	2.34	-0.3	1.98	0.231	-1.4	1	0	0	0
ENSG00000165406	2020-03-08	membrane-associated ring finger (C3HC4) 8, E3 ubiquitin protein ligase	lysosome|lysosomal membrane|endosome|integral component of membrane|cytoplasmic vesicle membrane|early endosome membrane|	protein polyubiquitination|antigen processing and presentation of peptide antigen via MHC class II|negative regulation of MHC class II biosynthetic process|	ubiquitin-protein transferase activity|zinc ion binding|ligase activity|MHC class II protein binding|	10	-0.9	2.05	10	1.1	4.98	1	1.98	0.231	-1.1	2	0	0	0
ENSG00000137809	ITGA11	integrin, alpha 11	plasma membrane|focal adhesion|integrin complex|membrane|	osteoblast differentiation|substrate-dependent cell migration|cell adhesion|cell-matrix adhesion|integrin-mediated signaling pathway|muscle organ development|extracellular matrix organization|cell adhesion mediated by integrin|collagen-activated signaling pathway|	collagen binding|collagen receptor activity|metal ion binding|	10	0.1	0.16	10	0.3	2.91	0.2	1.98	0.231	-0.7	1.5	0	0	0
ENSG00000065308	TRAM2	translocation associated membrane protein 2	integral component of membrane|	protein transport|collagen biosynthetic process|	protein binding|	10	-0.2	1.26	10	-0.2	0.863	-0.2	1.97	0.232	-0.9	1.8	0	0	0
ENSG00000232268	OR52I1	olfactory receptor, family 52, subfamily I, member 1	plasma membrane|integral component of membrane|	G-protein coupled receptor signaling pathway|detection of chemical stimulus involved in sensory perception of smell|	G-protein coupled receptor activity|olfactory receptor activity|	9	-0.2	0.616	9	-0.3	1.51	-0.2	1.97	0.232	-1.6	0.6	0	0	0
ENSG00000196578	OR5AC2	olfactory receptor, family 5, subfamily AC, member 2	plasma membrane|integral component of membrane|	G-protein coupled receptor signaling pathway|sensory perception of smell|detection of chemical stimulus involved in sensory perception of smell|detection of chemical stimulus involved in sensory perception of smell|	G-protein coupled receptor activity|olfactory receptor activity|	10	0.6	0.616	10	-0.2	1.66	-0.2	1.96	0.233	-1.6	1.2	0	0	0
ENSG00000221937	TAS2R40	taste receptor, type 2, member 40	plasma membrane|integral component of membrane|	detection of chemical stimulus involved in sensory perception of bitter taste|G-protein coupled receptor signaling pathway|	bitter taste receptor activity|	10	-0.3	1.98	10	-0.5	0.433	-0.5	1.96	0.233	-1.7	0.4	0	0	0
ENSG00000055211	GINM1	glycoprotein integral membrane 1	integral component of membrane|extracellular vesicular exosome|	None	None	10	-0.2	1.74	10	-0.1	0.373	-0.2	1.96	0.233	-1.4	1	0	0	0
ENSG00000180929	GPR62	G protein-coupled receptor 62	cellular_component|plasma membrane|integral component of membrane|receptor complex|	G-protein coupled receptor signaling pathway|biological_process|	G-protein coupled receptor activity|	10	0.2	0.674	10	0.3	1.64	0.3	1.96	0.233	-0.8	1.5	0	0	0
ENSG00000157693	C9ORF91	chromosome 9 open reading frame 91	cellular_component|integral component of membrane|	biological_process|	molecular_function|	10	-0.2	0.743	10	0.4	1.87	-0.2	1.96	0.233	-1.7	0.9	0	0	0
ENSG00000205279	CTXN3	cortexin 3	integral component of membrane|	None	None	10	-0.2	0.716	10	1	4.91	1	1.96	0.233	-0.3	2	0	0	0
ENSG00000180745	CLRN3	clarin 3	integral component of membrane|extracellular vesicular exosome|	None	None	10	-0.6	4.59	9	0.1	0.246	-0.5	1.96	0.233	-1.8	0.5	0	0	0
ENSG00000204296	C6ORF10	chromosome 6 open reading frame 10	nucleus|integral component of membrane|	None	None	10	-0.4	3.51	10	0	0	-0.3	1.95	0.234	-1.6	0.5	0	0	0
ENSG00000130881	LRP3	low density lipoprotein receptor-related protein 3	coated pit|integral component of membrane|	receptor-mediated endocytosis|	None	10	0.4	2.68	10	0	0	0.2	1.95	0.234	-0.5	1.5	0	0	0
ENSG00000182256	GABRG3	gamma-aminobutyric acid (GABA) A receptor, gamma 3	plasma membrane|cell junction|chloride channel complex|postsynaptic membrane|	gamma-aminobutyric acid signaling pathway|synaptic transmission|ion transmembrane transport|response to drug|transmembrane transport|chloride transmembrane transport|	GABA-A receptor activity|extracellular ligand-gated ion channel activity|chloride channel activity|	10	0.4	0.982	10	0.3	1.36	0.3	1.95	0.234	-1.3	1.3	0	0	0
ENSG00000173890	GPR160	G protein-coupled receptor 160	plasma membrane|integral component of membrane|receptor complex|	G-protein coupled receptor signaling pathway|	G-protein coupled receptor activity|	10	-0.2	0.422	10	1	4.48	-0.3	1.94	0.236	-0.8	2	0	0	0
ENSG00000139292	LGR5	leucine-rich repeat containing G protein-coupled receptor 5	integral component of plasma membrane|trans-Golgi network membrane|	G-protein coupled receptor signaling pathway|inner ear development|positive regulation of canonical Wnt signaling pathway|	transmembrane signaling receptor activity|protein binding|	10	-0.5	0.947	10	-0.3	1.23	-0.4	1.94	0.236	-1.7	0.5	0	0	0
ENSG00000106771	TMEM245	transmembrane protein 245	integral component of membrane|	biological_process|	molecular_function|	10	0.2	1.76	10	0.1	0.367	0.2	1.94	0.236	-1.2	1.3	0	0	0
ENSG00000143297	FCRL5	Fc receptor-like 5	plasma membrane|integral component of membrane|receptor complex|	None	None	10	-0.3	1.35	10	-0.2	0.769	-0.2	1.94	0.236	-1.5	0.9	0	0	0
ENSG00000159164	SV2A	synaptic vesicle glycoprotein 2A	cytoplasm|endoplasmic reticulum|cell-cell junction|integral component of membrane|synaptic vesicle membrane|neuromuscular junction|neuron projection|presynaptic active zone|	neurotransmitter transport|cellular calcium ion homeostasis|transmembrane transport|	receptor activity|protein kinase binding|transmembrane transporter activity|	10	0.2	1.74	10	0.9	1.44	0.4	1.93	0.237	-0.9	1.8	0	0	0
ENSG00000146350	TBC1D32	TBC1 domain family, member 32	cytoplasm|cilium|	multicellular organismal development|positive regulation of Rab GTPase activity|	Rab GTPase activator activity|	10	0.3	1.22	10	0.2	1.07	0.2	1.92	0.238	-0.9	1.5	0	0	0
ENSG00000185664	PMEL	premelanosome protein	extracellular region|endoplasmic reticulum membrane|Golgi apparatus|plasma membrane|integral component of membrane|multivesicular body membrane|melanosome|	melanosome organization|melanin biosynthetic process|	protein binding|	10	0.5	0.838	10	-0.3	1.78	-0.3	1.92	0.238	-1.6	1	0	0	0
ENSG00000173366	TLR9	toll-like receptor 9	Golgi membrane|extracellular region|cytoplasm|lysosome|endosome|endoplasmic reticulum|endoplasmic reticulum membrane|plasma membrane|endosome membrane|integral component of membrane|basolateral plasma membrane|apical plasma membrane|early phagosome|endolysosome membrane|	toll-like receptor signaling pathway|response to molecule of bacterial origin|MyD88-dependent toll-like receptor signaling pathway|inflammatory response|I-kappaB phosphorylation|insulin receptor signaling pathway|maintenance of gastrointestinal epithelium|negative regulation of NF-kappaB transcription factor activity|negative regulation of interleukin-6 production|negative regulation of interleuk…	transmembrane signaling receptor activity|interleukin-1 receptor binding|siRNA binding|	10	-0.4	3.07	10	-0.1	0.0253	-0.3	1.91	0.239	-1.8	0.4	0	0	0
ENSG00000197125	OR8B8	olfactory receptor, family 8, subfamily B, member 8	plasma membrane|integral component of membrane|	G-protein coupled receptor signaling pathway|sensory perception of smell|detection of chemical stimulus involved in sensory perception of smell|detection of chemical stimulus involved in sensory perception of smell|	G-protein coupled receptor activity|olfactory receptor activity|	10	-0.9	1.94	10	-0.2	1.26	-0.3	1.91	0.239	-1.9	0.4	0	0	0
ENSG00000145642	FAM159B	family with sequence similarity 159, member B	integral component of membrane|	None	None	10	0.2	1.29	10	0.3	0.96	0.3	1.91	0.239	-1.1	1.4	0	0	0
ENSG00000149133	OR5F1	olfactory receptor, family 5, subfamily F, member 1	plasma membrane|integral component of membrane|	G-protein coupled receptor signaling pathway|sensory perception of smell|detection of chemical stimulus involved in sensory perception of smell|detection of chemical stimulus involved in sensory perception of smell|	G-protein coupled receptor activity|olfactory receptor activity|	10	0	0	10	-0.3	2.51	-0.3	1.9	0.241	-1.6	0.5	0	0	0
ENSG00000180998	GPR137C	G protein-coupled receptor 137C	integral component of membrane|	None	None	10	0.2	1.01	10	0.9	3.71	0.5	1.9	0.241	-0.6	2	0	0	0
ENSG00000149930	TAOK2	TAO kinase 2	nucleus|nucleolus|cytoplasm|cytoskeleton|integral component of membrane|cytoplasmic membrane-bounded vesicle|dendrite|cytoplasmic vesicle membrane|receptor complex|	activation of MAPKK activity|regulation of cell growth|protein phosphorylation|protein targeting to membrane|apoptotic process|response to stress|cellular response to DNA damage stimulus|regulation of cell shape|cell migration|actin cytoskeleton organization|G2 DNA damage checkpoint|positive regulation of stress-activated MAPK cascade|positive regulation of JNK cascade|focal adhesion assembly|str…	protein serine/threonine kinase activity|ATP binding|mitogen-activated protein kinase kinase binding|	10	-0.4	3.38	10	0	0	-0.2	1.9	0.241	-1.8	0.3	0	0	0
ENSG00000174804	FZD4	frizzled class receptor 4	cytoplasm|plasma membrane|plasma membrane|integral component of plasma membrane|cell-cell junction|cell surface|clathrin-coated endocytic vesicle membrane|cell projection|extracellular vesicular exosome|	vasculogenesis|G-protein coupled receptor signaling pathway|Wnt signaling pathway, calcium modulating pathway|brain development|sensory perception of sound|negative regulation of cell-substrate adhesion|Wnt signaling pathway|neuron differentiation|regulation of vascular endothelial growth factor receptor signaling pathway|locomotion involved in locomotory behavior|substrate adhesion-dependent cel…	G-protein coupled receptor activity|protein binding|Wnt-protein binding|cytokine binding|PDZ domain binding|PDZ domain binding|ubiquitin protein ligase binding|protein homodimerization activity|Wnt-activated receptor activity|protein heterodimerization activity|	9	-0.2	1.06	9	-0.2	0.984	-0.2	1.9	0.241	-1.2	1.3	0	0	0
ENSG00000179615	OR2AP1	olfactory receptor, family 2, subfamily AP, member 1	plasma membrane|integral component of membrane|	G-protein coupled receptor signaling pathway|detection of chemical stimulus involved in sensory perception of smell|	G-protein coupled receptor activity|olfactory receptor activity|	10	1.1	4.53	10	-0.8	1.26	1	1.89	0.242	-1.1	2	0	0	0
ENSG00000179104	TMTC2	transmembrane and tetratricopeptide repeat containing 2	endoplasmic reticulum|integral component of membrane|	None	None	10	0.3	1.96	10	-0.8	3.72	-0.7	1.89	0.242	-1.9	0.5	0	0	0
ENSG00000139324	TMTC3	transmembrane and tetratricopeptide repeat containing 3	integral component of membrane|	post-embryonic development|regulation of gene expression|lung alveolus development|muscle fiber development|bud outgrowth involved in lung branching|	None	10	0.2	0.424	10	0.5	2.39	0.3	1.89	0.242	-1.8	1.2	0	0	0
ENSG00000167619	TMEM145	transmembrane protein 145	integral component of membrane|	G-protein coupled receptor signaling pathway|response to pheromone|	None	10	0.2	2.54	10	-0.4	0.613	0.2	1.89	0.242	-1	1.5	0	0	0
ENSG00000173198	CYSLTR1	cysteinyl leukotriene receptor 1	plasma membrane|integral component of plasma membrane|membrane|	calcium ion transport|chemotaxis|defense response|inflammatory response|G-protein coupled receptor signaling pathway|positive regulation of cytosolic calcium ion concentration|respiratory gaseous exchange|positive regulation of angiogenesis|positive regulation of vasoconstriction|	leukotriene receptor activity|protein binding|	10	-0.3	0.831	10	-0.2	1.22	-0.3	1.88	0.243	-1.6	0.5	0	0	0
ENSG00000255223	OR5M11	olfactory receptor, family 5, subfamily M, member 11	plasma membrane|integral component of membrane|	G-protein coupled receptor signaling pathway|detection of chemical stimulus involved in sensory perception of smell|	G-protein coupled receptor activity|olfactory receptor activity|	10	1	2.5	10	0.2	0.749	0.2	1.88	0.243	-0.1	2	0	0	0
ENSG00000116996	ZP4	zona pellucida glycoprotein 4	extracellular region|proteinaceous extracellular matrix|plasma membrane|integral component of membrane|	positive regulation of humoral immune response|single fertilization|binding of sperm to zona pellucida|protein kinase A signaling|multicellular organism reproduction|intracellular signal transduction|positive regulation of T cell proliferation|positive regulation of protein kinase activity|acrosomal vesicle exocytosis|protein kinase C signaling|positive regulation of acrosome reaction|negative re…	signal transducer activity|acrosin binding|	10	0.1	0.479	10	0.3	1.75	0.2	1.88	0.243	-0.4	1.6	0	0	0
ENSG00000104290	FZD3	frizzled class receptor 3	cytoplasm|plasma membrane|plasma membrane|integral component of membrane|apical plasma membrane|lateral plasma membrane|axon|dendrite|neuron projection membrane|neuronal cell body|apical part of cell|presynaptic active zone|	establishment of planar polarity|neuron migration|neural tube closure|hair follicle development|vasculature development|G-protein coupled receptor signaling pathway coupled to cGMP nucleotide second messenger|gonad development|facial nucleus development|neuron differentiation|cell proliferation in midbrain|post-anal tail morphogenesis|inner ear morphogenesis|canonical Wnt signaling pathway|commis…	G-protein coupled receptor activity|protein binding|Wnt-protein binding|PDZ domain binding|Wnt-activated receptor activity|Wnt-activated receptor activity|	10	-0.2	1.25	10	-0.3	0.895	-0.2	1.88	0.243	-1.6	0.6	0	0	0
ENSG00000089101	C20ORF26	chromosome 20 open reading frame 26	None	None	None	10	-0.3	2.65	10	-0.1	0.0166	-0.2	1.88	0.243	-1.6	0.7	0	0	0
ENSG00000167194	C16ORF92	chromosome 16 open reading frame 92	integral component of membrane|	None	None	10	-0.3	1.44	10	-1	1.84	-0.3	1.88	0.243	-1.7	1.3	0	0	0
ENSG00000196932	TMEM26	transmembrane protein 26	integral component of membrane|	None	None	10	-0.1	0.156	10	0.9	4.15	0.2	1.88	0.243	-0.3	1.9	0	0	0
ENSG00000152672	CLEC4F	C-type lectin domain family 4, member F	integral component of membrane|	endocytosis|	carbohydrate binding|	10	0.4	3.94	10	0	0	0.3	1.87	0.244	-1.1	1.4	0	0	0
ENSG00000120160	EQTN	equatorin, sperm acrosome associated	inner acrosomal membrane|outer acrosomal membrane|early endosome|plasma membrane|integral component of membrane|	endocytosis|fusion of sperm to egg plasma membrane|acrosomal vesicle exocytosis|	None	10	1	4.85	10	-0.1	0.296	1	1.87	0.244	-0.6	2	0	0	0
ENSG00000171611	PTCRA	pre T-cell antigen receptor alpha	integral component of membrane|	negative regulation of thymocyte apoptotic process|	protein binding|	10	0	0	10	0.4	2.41	0.3	1.87	0.244	-0.8	1.5	0	0	0
ENSG00000116329	OPRD1	opioid receptor, delta 1	cytoplasm|plasma membrane|integral component of plasma membrane|intrinsic component of plasma membrane|vesicle|dendrite membrane|axon terminus|membrane raft|postsynaptic membrane|	protein import into nucleus, translocation|immune response|G-protein coupled receptor signaling pathway|G-protein coupled receptor signaling pathway, coupled to cyclic nucleotide second messenger|adenylate cyclase-inhibiting G-protein coupled receptor signaling pathway|phospholipase C-activating G-protein coupled receptor signaling pathway|neuropeptide signaling pathway|adult locomotory behavior|…	opioid receptor activity|protein binding|enkephalin receptor activity|	10	0.2	2.49	10	-0.2	1	0.2	1.87	0.244	-1	1.4	0	0	0
ENSG00000108219	TSPAN14	tetraspanin 14	plasma membrane|integral component of membrane|	positive regulation of Notch signaling pathway|protein maturation|establishment of protein localization to plasma membrane|	enzyme binding|	10	0.3	1.28	10	0.2	0.798	0.2	1.86	0.246	-0.4	1.7	0	0	0
ENSG00000174950	CD164L2	CD164 sialomucin-like 2	integral component of membrane|	None	None	10	0.5	4.56	10	0	0	0.5	1.86	0.246	-0.6	1.7	0	0	0
ENSG00000147262	GPR119	G protein-coupled receptor 119	plasma membrane|integral component of membrane|receptor complex|	G-protein coupled receptor signaling pathway|insulin secretion|	G-protein coupled receptor activity|phosphatidylcholine binding|	10	-0.3	2.01	10	-0.1	0.528	-0.2	1.86	0.246	-1.5	0.9	0	0	0
ENSG00000138271	GPR87	G protein-coupled receptor 87	plasma membrane|integral component of membrane|	negative regulation of adenylate cyclase activity|biological_process|G-protein coupled purinergic nucleotide receptor signaling pathway|	G-protein coupled purinergic nucleotide receptor activity|	10	0.2	1.19	10	0.7	3.67	0.6	1.86	0.246	-0.4	1.9	0	0	0
ENSG00000085265	FCN1	ficolin (collagen/fibrinogen domain containing) 1	extracellular region|collagen trimer|	complement activation, lectin pathway|complement activation|opsonization|innate immune response|	antigen binding|calcium ion binding|protein binding|carbohydrate binding|	10	0.3	3.5	10	-0.1	0.496	0.3	1.85	0.247	-1.3	1.2	0	0	0
ENSG00000104974	LILRA1	leukocyte immunoglobulin-like receptor, subfamily A (with TM domain), member 1	plasma membrane|integral component of membrane|	immune system process|defense response|cell surface receptor signaling pathway|regulation of immune response|	antigen binding|transmembrane signaling receptor activity|	10	-0.5	1.5	10	-0.3	0.948	-0.3	1.85	0.247	-1.6	0.5	0	0	0
ENSG00000196189	SEMA4A	sema domain, immunoglobulin domain (Ig), transmembrane domain (TM) and short cytoplasmic domain, (semaphorin) 4A	plasma membrane|integral component of membrane|	angiogenesis|axon guidance|regulation of cell shape|regulation of endothelial cell migration|negative regulation of angiogenesis|T-helper 1 cell differentiation|semaphorin-plexin signaling pathway|	receptor activity|protein binding|	10	-0.4	0.269	10	-1	2.79	-0.5	1.84	0.248	-1.9	0.1	0	0	0
ENSG00000176236	C10ORF111	chromosome 10 open reading frame 111	integral component of membrane|	None	None	10	-0.7	2.67	9	0.2	1.69	-0.2	1.83	0.25	-1.7	1.5	0	0	0
ENSG00000138696	BMPR1B	bone morphogenetic protein receptor, type IB	plasma membrane|integral component of plasma membrane|receptor complex|	skeletal system development|cartilage condensation|ovarian cumulus expansion|eye development|chondrocyte differentiation|protein phosphorylation|inflammatory response|dorsal/ventral pattern formation|signal transduction by phosphorylation|positive regulation of bone mineralization|BMP signaling pathway|BMP signaling pathway|BMP signaling pathway|retinal ganglion cell axon guidance|limb morphogene…	protein serine/threonine kinase activity|transmembrane receptor protein serine/threonine kinase activity|transmembrane receptor protein serine/threonine kinase activity|receptor signaling protein serine/threonine kinase activity|transforming growth factor beta receptor activity, type I|protein binding|ATP binding|SMAD binding|metal ion binding|	10	-0.2	0.561	10	-0.4	2.36	-0.3	1.83	0.25	-1.6	0.6	0	0	0
ENSG00000163464	CXCR1	chemokine (C-X-C motif) receptor 1	plasma membrane|membrane|integral component of membrane|	dendritic cell chemotaxis|chemotaxis|inflammatory response|cell surface receptor signaling pathway|G-protein coupled receptor signaling pathway|receptor internalization|interleukin-8-mediated signaling pathway|chemokine-mediated signaling pathway|chemokine-mediated signaling pathway|	interleukin-8 receptor activity|G-protein coupled receptor activity|chemokine receptor activity|interleukin-8 binding|	10	0.2	0.723	10	-0.5	2.38	-0.4	1.82	0.251	-1.6	0.8	0	0	0
ENSG00000187871	GFRAL	GDNF family receptor alpha like	plasma membrane|integral component of membrane|	stress-activated protein kinase signaling cascade|negative regulation of neuron apoptotic process|negative regulation of extrinsic apoptotic signaling pathway in absence of ligand|	None	10	0.4	2.55	10	-0.4	1.02	0.4	1.82	0.251	-2	1	0	0	0
ENSG00000081842	PCDHA6	protocadherin alpha 6	extracellular region|integral component of plasma membrane|	cell adhesion|homophilic cell adhesion|nervous system development|	calcium ion binding|	5	0.3	2.91	5	0	0	0.3	1.82	0.251	-1.1	2	0	0	0
ENSG00000267795	SMIM22	small integral membrane protein 22	integral component of membrane|	None	None	10	-0.1	0.216	10	-0.3	2.22	-0.3	1.81	0.252	-1.6	0.6	0	0	0
ENSG00000186188	FFAR4	free fatty acid receptor 4	plasma membrane|integral component of membrane|endocytic vesicle|	G-protein coupled receptor signaling pathway|regulation of glucose transport|negative regulation of apoptotic process|hormone secretion|negative regulation of cytokine secretion|negative regulation of inflammatory response|detection of chemical stimulus involved in sensory perception of taste|positive regulation of ERK1 and ERK2 cascade|	fatty acid binding|taste receptor activity|	10	-0.1	0.229	10	0.3	3.25	0.2	1.81	0.252	-0.8	1.5	0	0	0
ENSG00000204977	TRIM13	tripartite motif containing 13	cytoplasm|endoplasmic reticulum membrane|integral component of membrane|perinuclear endoplasmic reticulum|	signal transduction|anatomical structure morphogenesis|response to gamma radiation|positive regulation of cell death|positive regulation of macroautophagy|ER-associated ubiquitin-dependent protein catabolic process|negative regulation of viral transcription|positive regulation of I-kappaB kinase/NF-kappaB signaling|positive regulation of I-kappaB kinase/NF-kappaB signaling|proteasome-mediated ubi…	ubiquitin-protein transferase activity|signal transducer activity|protein binding|zinc ion binding|ligase activity|	10	0	0	10	1.3	5.1	1.3	1.8	0.253	-0.4	2	0	0	0
ENSG00000177476	OR2G3	olfactory receptor, family 2, subfamily G, member 3	plasma membrane|integral component of membrane|	G-protein coupled receptor signaling pathway|detection of chemical stimulus involved in sensory perception of smell|	G-protein coupled receptor activity|olfactory receptor activity|	10	0	0	10	0.5	3.68	0.4	1.8	0.253	-0.6	1.7	0	0	0
ENSG00000164880	INTS1	integrator complex subunit 1	membrane|integral component of membrane|nuclear membrane|integrator complex|	inner cell mass cell proliferation|snRNA processing|U2 snRNA 3'-end processing|negative regulation of apoptotic process|negative regulation of cysteine-type endopeptidase activity involved in apoptotic process|	None	10	0.1	0.233	10	0.7	4.3	0.7	1.8	0.253	-0.9	1.9	0	0	0
ENSG00000131724	IL13RA1	interleukin 13 receptor, alpha 1	plasma membrane|interleukin-13 receptor complex|	positive regulation of immunoglobulin production|cell surface receptor signaling pathway|positive regulation of B cell proliferation|interleukin-13-mediated signaling pathway|	protein binding|interleukin-13 receptor activity|	10	-0.3	0.857	10	-0.2	1.13	-0.2	1.8	0.253	-1.6	0.6	0	0	0
ENSG00000170881	RNF139	ring finger protein 139	endoplasmic reticulum|endoplasmic reticulum membrane|integral component of membrane|	negative regulation of cell proliferation|protein ubiquitination|protein ubiquitination|protein ubiquitination|negative regulation of translation|regulation of protein ubiquitination|regulation of ER to Golgi vesicle-mediated transport|regulation of protein processing|	ubiquitin-protein transferase activity|ubiquitin-protein transferase activity|receptor activity|protein binding|zinc ion binding|ligase activity|small conjugating protein ligase activity|	10	0.7	1.28	10	0.9	0.825	0.8	1.8	0.253	-0.5	2	0	0	0
ENSG00000222040	ADRA2B	adrenoceptor alpha 2B	plasma membrane|integral component of plasma membrane|	MAPK cascade|angiogenesis|regulation of vascular smooth muscle contraction|G-protein coupled receptor signaling pathway|cell-cell signaling|female pregnancy|blood coagulation|negative regulation of norepinephrine secretion|negative regulation of norepinephrine secretion|platelet activation|activation of protein kinase B activity|negative regulation of epinephrine secretion|epidermal growth factor…	alpha2-adrenergic receptor activity|protein binding|epinephrine binding|	10	-0.4	3.03	10	0.1	0.848	-0.3	1.8	0.253	-1.5	1	0	0	0
ENSG00000143195	ILDR2	immunoglobulin-like domain containing receptor 2	endoplasmic reticulum membrane|integral component of membrane|	response to glucose|insulin secretion|cell differentiation|pancreas development|homeostasis of number of cells within a tissue|	None	10	-0.4	1.37	10	-0.2	0.781	-0.2	1.8	0.253	-1.6	0.6	0	0	0
ENSG00000169306	IL1RAPL1	interleukin 1 receptor accessory protein-like 1	cytoplasm|plasma membrane|cell surface|integral component of membrane|axon|dendrite|postsynaptic membrane|	heterophilic cell-cell adhesion|signal transduction|regulation of neuron projection development|neuron differentiation|negative regulation of exocytosis|positive regulation of dendrite morphogenesis|calcium ion transmembrane transport|presynaptic membrane assembly|	receptor binding|voltage-gated calcium channel activity|protein binding|	10	-0.4	0.962	10	-0.1	1.2	-0.2	1.79	0.255	-1.6	0.6	0	0	0
ENSG00000113303	BTNL8	butyrophilin-like 8	integral component of membrane|	immune system process|	protein binding|	10	0	0	10	0.3	2.75	0.2	1.79	0.255	-0.8	1.5	0	0	0
ENSG00000171942	OR10H2	olfactory receptor, family 10, subfamily H, member 2	plasma membrane|integral component of membrane|	G-protein coupled receptor signaling pathway|detection of chemical stimulus involved in sensory perception of smell|	G-protein coupled receptor activity|olfactory receptor activity|	10	-0.4	1.22	10	-0.3	0.789	-0.4	1.79	0.255	-1.5	0.8	0	0	0
ENSG00000111321	LTBR	lymphotoxin beta receptor (TNFR superfamily, member 3)	integral component of membrane|	apoptotic process|signal transduction|viral process|positive regulation of I-kappaB kinase/NF-kappaB signaling|positive regulation of JNK cascade|cellular response to mechanical stimulus|positive regulation of extrinsic apoptotic signaling pathway|	protein binding|ubiquitin protein ligase binding|identical protein binding|	10	0.2	0.352	10	-1.3	5.23	-1.3	1.78	0.256	-2	0.3	0	0	0
ENSG00000116815	CD58	CD58 molecule	plasma membrane|integral component of plasma membrane|cell surface|membrane|anchored component of membrane|extracellular vesicular exosome|	cell adhesion|blood coagulation|single organismal cell-cell adhesion|heterotypic cell-cell adhesion|leukocyte migration|cellular response to interferon-gamma|cellular response to tumor necrosis factor|positive regulation of interleukin-8 secretion|	receptor binding|protein binding|	10	0.2	1.06	10	-0.4	4.37	-0.4	1.78	0.256	-1.6	1.3	0	0	0
ENSG00000126773	PCNXL4	pecanex-like 4 (Drosophila)	integral component of membrane|	None	None	10	0	0	10	-0.4	3.11	-0.3	1.78	0.256	-1.5	0.8	0	0	0
ENSG00000196171	OR6K2	olfactory receptor, family 6, subfamily K, member 2	plasma membrane|integral component of membrane|	G-protein coupled receptor signaling pathway|detection of chemical stimulus involved in sensory perception of smell|	G-protein coupled receptor activity|olfactory receptor activity|	10	-0.4	3.03	10	0	0	-0.3	1.77	0.257	-1.6	0.6	0	0	0
ENSG00000106701	FSD1L	fibronectin type III and SPRY domain containing 1-like	cellular_component|	biological_process|	molecular_function|	10	0.3	1.65	10	-0.3	1.02	-0.3	1.77	0.257	-1.1	1.2	0	0	0
ENSG00000206579	XKR4	XK, Kell blood group complex subunit-related family, member 4	integral component of membrane|	None	None	10	-0.1	0.542	10	-0.4	2.22	-0.2	1.77	0.257	-1.5	0.7	0	0	0
ENSG00000184524	CEND1	cell cycle exit and neuronal differentiation 1	integral component of membrane|	adult walking behavior|cerebellar granular layer maturation|cerebellar Purkinje cell differentiation|radial glia guided migration of cerebellar granule cell|negative regulation of cerebellar granule cell precursor proliferation|	None	10	-0.2	0.827	10	0.2	1.34	-0.2	1.77	0.257	-1.3	1	0	0	0
ENSG00000255298	OR8G5	olfactory receptor, family 8, subfamily G, member 5	plasma membrane|integral component of membrane|	G-protein coupled receptor signaling pathway|detection of chemical stimulus involved in sensory perception of smell|	G-protein coupled receptor activity|olfactory receptor activity|	9	-0.5	1.68	9	0.2	1.11	0.2	1.77	0.257	-1.2	1.7	0	0	0
ENSG00000180155	LYNX1	Ly6/neurotoxin 1	plasma membrane|dendrite|anchored component of membrane|extracellular vesicular exosome|	None	None	10	-0.3	2.24	10	0.1	0.229	-0.2	1.76	0.259	-1.6	0.7	0	0	0
ENSG00000132911	NMUR2	neuromedin U receptor 2	plasma membrane|integral component of membrane|	reduction of food intake in response to dietary excess|calcium ion transport|chloride transport|regulation of smooth muscle contraction|phospholipase C-activating G-protein coupled receptor signaling pathway|positive regulation of cytosolic calcium ion concentration|neuropeptide signaling pathway|cell-cell signaling|central nervous system development|grooming behavior|feeding behavior|calcium-med…	neuromedin U receptor activity|G-protein coupled receptor activity|intracellular calcium activated chloride channel activity|GTP binding|neuromedin U binding|	10	0.3	3.26	10	0	0	0.2	1.76	0.259	-1.1	1.3	0	0	0
ENSG00000188340	OR6N2	olfactory receptor, family 6, subfamily N, member 2	plasma membrane|integral component of membrane|	G-protein coupled receptor signaling pathway|detection of chemical stimulus involved in sensory perception of smell|	G-protein coupled receptor activity|olfactory receptor activity|	10	0.1	1.04	10	0.5	2.75	0.3	1.76	0.259	-0.8	1.5	0	0	0
ENSG00000099246	RAB18	RAB18, member RAS oncogene family	intracellular|plasma membrane|extracellular vesicular exosome|	eye development|GTP catabolic process|small GTPase mediated signal transduction|brain development|protein transport|lipid particle organization|	GTPase activity|protein binding|GTP binding|GDP binding|	10	-0.4	2.93	10	0.2	0.815	-0.3	1.75	0.26	-1.5	0.8	0	0	0
ENSG00000111452	GPR133	G protein-coupled receptor 133	plasma membrane|integral component of membrane|	G-protein coupled receptor signaling pathway|neuropeptide signaling pathway|	G-protein coupled receptor activity|	10	-0.4	3.64	10	0.1	0.375	-0.3	1.75	0.26	-1.5	0.8	0	0	0
ENSG00000181718	OR5T2	olfactory receptor, family 5, subfamily T, member 2	plasma membrane|integral component of membrane|	G-protein coupled receptor signaling pathway|detection of chemical stimulus involved in sensory perception of smell|	G-protein coupled receptor activity|olfactory receptor activity|	10	0.2	1.72	10	0.1	0.321	0.2	1.75	0.26	-1.1	1.3	0	0	0
ENSG00000109180	OCIAD1	OCIA domain containing 1	mitochondrion|endosome|membrane|	None	protein binding|	10	-0.1	0.218	10	-0.5	2.86	-0.3	1.75	0.26	-1.4	1.2	0	0	0
ENSG00000184933	OR6A2	olfactory receptor, family 6, subfamily A, member 2	plasma membrane|integral component of membrane|	signal transduction|G-protein coupled receptor signaling pathway|sensory perception of smell|detection of chemical stimulus involved in sensory perception of smell|detection of chemical stimulus involved in sensory perception of smell|	G-protein coupled receptor activity|olfactory receptor activity|	10	-0.1	0.248	10	-0.2	1.94	-0.2	1.75	0.26	-1.5	0.8	0	0	0
ENSG00000172215	CXCR6	chemokine (C-X-C motif) receptor 6	plasma membrane|integral component of plasma membrane|	chemotaxis|inflammatory response|G-protein coupled receptor signaling pathway|viral genome replication|chemokine-mediated signaling pathway|	G-protein coupled receptor activity|coreceptor activity|C-X-C chemokine receptor activity|	10	-0.3	1.58	10	-1	1.96	-0.4	1.74	0.261	-1.9	0.1	0	0	0
ENSG00000148948	LRRC4C	leucine rich repeat containing 4C	extracellular space|membrane|integral component of membrane|cell junction|postsynaptic membrane|	regulation of axonogenesis|	protein binding|	10	-0.3	1.87	10	-0.2	0.299	-0.2	1.74	0.261	-1.5	1	0	0	0
ENSG00000228273	MUC3A	mucin 3A, cell surface associated	extracellular region|Golgi lumen|integral component of membrane|	O-glycan processing|post-translational protein modification|cellular protein metabolic process|	extracellular matrix structural constituent|extracellular matrix constituent, lubricant activity|	10	0.5	0.723	10	-0.2	1.82	-0.3	1.74	0.261	-1.3	1.4	0	0	0
ENSG00000156097	GPR61	G protein-coupled receptor 61	cellular_component|plasma membrane|integral component of membrane|receptor complex|	G-protein coupled receptor signaling pathway|biological_process|	G-protein coupled receptor activity|	10	0.3	2.04	10	0.1	0.265	0.2	1.74	0.261	-1	1.5	0	0	0
ENSG00000164983	TMEM65	transmembrane protein 65	mitochondrion|integral component of membrane|	None	None	10	-0.3	1.33	10	-0.2	0.573	-0.2	1.73	0.263	-1.6	0.7	0	0	0
ENSG00000177693	OR4F4	olfactory receptor, family 4, subfamily F, member 4	plasma membrane|integral component of membrane|	G-protein coupled receptor signaling pathway|detection of chemical stimulus involved in sensory perception of smell|	G-protein coupled receptor activity|olfactory receptor activity|	3	-0.2	1.16	3	-0.2	0.706	-0.2	1.73	0.263	-2	1.3	0	0	0
ENSG00000221910	OR2F2	olfactory receptor, family 2, subfamily F, member 2	plasma membrane|integral component of membrane|	G-protein coupled receptor signaling pathway|detection of chemical stimulus involved in sensory perception of smell|	G-protein coupled receptor activity|olfactory receptor activity|	10	-0.3	2	10	-0.1	0.318	-0.2	1.73	0.263	-1.5	0.8	0	0	0
ENSG00000221882	OR3A2	olfactory receptor, family 3, subfamily A, member 2	plasma membrane|integral component of plasma membrane|	signal transduction|G-protein coupled receptor signaling pathway|sensory perception of chemical stimulus|detection of chemical stimulus involved in sensory perception of smell|	receptor activity|G-protein coupled receptor activity|olfactory receptor activity|	10	-0.2	1.4	10	-0.1	0.522	-0.2	1.73	0.263	-1.5	0.8	0	0	0
ENSG00000221963	APOL6	apolipoprotein L, 6	extracellular region|cytoplasm|	lipid transport|lipoprotein metabolic process|	lipid binding|	10	0.2	0.934	10	0.1	0.97	0.2	1.73	0.263	-0.9	1.6	0	0	0
ENSG00000101251	SEL1L2	sel-1 suppressor of lin-12-like 2 (C. elegans)	integral component of membrane|	None	None	10	-0.3	2.54	10	0.8	3.24	0.2	1.73	0.263	-0.7	1.8	0	0	0
ENSG00000161640	SIGLEC11	sialic acid binding Ig-like lectin 11	integral component of membrane|	cell adhesion|	None	8	-0.2	1.36	8	-0.2	0.498	-0.2	1.72	0.264	-1.6	1	0	0	0
ENSG00000204217	BMPR2	bone morphogenetic protein receptor, type II (serine/threonine kinase)	extracellular space|cytoplasm|plasma membrane|plasma membrane|integral component of plasma membrane|caveola|basal plasma membrane|cell surface|apical plasma membrane|dendrite|neuronal cell body|fully spanning plasma membrane|	mesoderm formation|positive regulation of endothelial cell proliferation|lymphangiogenesis|blood vessel remodeling|chondrocyte development|negative regulation of systemic arterial blood pressure|transcription from RNA polymerase II promoter|protein phosphorylation|transmembrane receptor protein serine/threonine kinase signaling pathway|brain development|cellular response to starvation|anterior/po…	receptor signaling protein serine/threonine kinase activity|transforming growth factor beta-activated receptor activity|protein binding|ATP binding|activin receptor activity, type II|growth factor binding|metal ion binding|	10	-0.3	1.59	10	-0.4	0.34	-0.4	1.72	0.264	-1.7	0.5	0	0	0
ENSG00000139874	SSTR1	somatostatin receptor 1	cytoplasm|plasma membrane|integral component of plasma membrane|	cell surface receptor signaling pathway|G-protein coupled receptor signaling pathway, coupled to cyclic nucleotide second messenger|glutamate receptor signaling pathway|neuropeptide signaling pathway|cell-cell signaling|spermatogenesis|response to nutrient|digestion|negative regulation of cell proliferation|cerebellum development|forebrain development|somatostatin signaling pathway|response to st…	somatostatin receptor activity|	10	-0.4	2.3	10	0	0	-0.4	1.72	0.264	-1.7	0.5	0	0	0
ENSG00000198657	OR8B4	olfactory receptor, family 8, subfamily B, member 4	plasma membrane|integral component of membrane|	G-protein coupled receptor signaling pathway|detection of chemical stimulus involved in sensory perception of smell|	G-protein coupled receptor activity|olfactory receptor activity|	9	-0.5	3.17	9	-0.1	0.479	-0.3	1.72	0.264	-1.8	0.5	0	0	0
ENSG00000127529	OR7C2	olfactory receptor, family 7, subfamily C, member 2	plasma membrane|integral component of membrane|	G-protein coupled receptor signaling pathway|detection of chemical stimulus involved in sensory perception of smell|	G-protein coupled receptor activity|olfactory receptor activity|	9	0.3	2.56	9	-0.4	2.46	-0.3	1.72	0.264	-1.3	1.2	0	0	0
ENSG00000139547	RDH16	retinol dehydrogenase 16 (all-trans)	endoplasmic reticulum membrane|integral component of membrane|intracellular membrane-bounded organelle|	lipid metabolic process|oxidation-reduction process|	retinol dehydrogenase activity|electron carrier activity|	10	-0.2	0.785	10	-0.2	1.07	-0.2	1.72	0.264	-1.4	0.9	0	0	0
ENSG00000067113	PPAP2A	phosphatidic acid phosphatase type 2A	plasma membrane|integral component of plasma membrane|membrane|extracellular vesicular exosome|	protein dephosphorylation|lipid metabolic process|sphingolipid metabolic process|protein kinase C-activating G-protein coupled receptor signaling pathway|negative regulation of cell proliferation|germ cell migration|regulation of lipid metabolic process|sphingolipid biosynthetic process|intracellular steroid hormone receptor signaling pathway|androgen receptor signaling pathway|small molecule met…	phosphatidate phosphatase activity|phosphatidate phosphatase activity|	10	-0.3	1.28	10	-0.3	0.578	-0.3	1.72	0.264	-1.7	0.5	0	0	0
ENSG00000184394	OR4N5	olfactory receptor, family 4, subfamily N, member 5	plasma membrane|integral component of membrane|	G-protein coupled receptor signaling pathway|detection of chemical stimulus involved in sensory perception of smell|	G-protein coupled receptor activity|olfactory receptor activity|	10	0.5	4.12	10	0	0	0.4	1.71	0.266	-0.6	1.7	0	0	0
ENSG00000189184	PCDH18	protocadherin 18	plasma membrane|integral component of membrane|	homophilic cell adhesion|brain development|	calcium ion binding|	10	-0.2	1.32	10	-0.3	0.669	-0.2	1.71	0.266	-1.6	0.6	0	0	0
ENSG00000185097	OR4F16	olfactory receptor, family 4, subfamily F, member 16	None	None	None	10	0.2	1.32	10	-1	4.59	-0.9	1.71	0.266	-1.9	0.6	0	0	0
ENSG00000137819	PAQR5	progestin and adipoQ receptor family member V	integral component of membrane|	multicellular organismal development|oogenesis|	receptor activity|steroid binding|	10	-0.4	3.2	10	0	0	-0.3	1.71	0.266	-1.7	0.6	0	0	0
ENSG00000074276	CDHR2	cadherin-related family member 2	integral component of membrane|apical plasma membrane|cell junction|extracellular vesicular exosome|	cell adhesion|homophilic cell adhesion|negative regulation of cell growth|	calcium ion binding|protein binding|	10	0.1	0.19	10	0.2	1.65	0.2	1.7	0.267	-1	1.5	0	0	0
ENSG00000176200	OR4D11	olfactory receptor, family 4, subfamily D, member 11	plasma membrane|integral component of membrane|	G-protein coupled receptor signaling pathway|detection of chemical stimulus involved in sensory perception of smell|	G-protein coupled receptor activity|olfactory receptor activity|	10	-0.4	3	10	0.3	1.86	0.2	1.7	0.267	-1.6	1.1	0	0	0
ENSG00000164659	KIAA1324L	KIAA1324-like	integral component of membrane|	None	None	10	0.2	0.433	10	-0.2	2.2	-0.2	1.7	0.267	-1.4	1	0	0	0
ENSG00000241690	TMEM239	transmembrane protein 239	integral component of membrane|	None	None	5	0.3	3.07	5	0	0	0.3	1.7	0.267	-1.3	1.9	0	0	0
ENSG00000162621	LRRC53	leucine rich repeat containing 53	integral component of membrane|	None	None	10	0.3	0.71	10	1.4	4.32	1.4	1.69	0.268	-0.6	2	0	0	0
ENSG00000174482	LINGO2	leucine rich repeat and Ig domain containing 2	integral component of membrane|	None	None	10	0.1	0.338	10	0.2	1.89	0.2	1.69	0.268	-1	1.4	0	0	0
ENSG00000167615	LENG8	leukocyte receptor cluster (LRC) member 8	None	None	protein binding|	10	-0.1	0.209	10	-0.2	1.82	-0.2	1.69	0.268	-1.5	0.9	0	0	0
ENSG00000157111	TMEM171	transmembrane protein 171	integral component of membrane|	None	None	10	0.7	1.55	10	-0.2	0.944	0.3	1.68	0.27	-0.6	1.7	0	0	0
ENSG00000126777	KTN1	kinectin 1 (kinesin receptor)	endoplasmic reticulum|endoplasmic reticulum membrane|integral component of plasma membrane|membrane|integral component of membrane|	microtubule-based movement|	kinesin binding|poly(A) RNA binding|	10	-0.8	2.9	10	0	0	-0.7	1.68	0.27	-2	0.3	0	0	0
ENSG00000147676	MAL2	mal, T-cell differentiation protein 2 (gene/pseudogene)	endomembrane system|integral component of membrane|apical plasma membrane|membrane raft|perinuclear region of cytoplasm|extracellular vesicular exosome|	None	protein binding|	10	-0.2	0.309	10	-1.1	3.1	-0.4	1.68	0.27	-1.9	0.3	0	0	0
ENSG00000189430	NCR1	natural cytotoxicity triggering receptor 1	integral component of plasma membrane|SWI/SNF complex|	cellular defense response|signal transduction|natural killer cell activation|intracellular signal transduction|regulation of natural killer cell mediated cytotoxicity|	receptor signaling protein activity|	10	0.6	3.99	10	0	0	0.5	1.68	0.27	-0.4	1.8	0	0	0
ENSG00000180616	SSTR2	somatostatin receptor 2	cytoplasm|plasma membrane|integral component of plasma membrane|	regulation of muscle contraction|G-protein coupled receptor signaling pathway, coupled to cyclic nucleotide second messenger|adenylate cyclase-inhibiting G-protein coupled receptor signaling pathway|neuropeptide signaling pathway|cell-cell signaling|spermatogenesis|response to nutrient|digestion|negative regulation of cell proliferation|cerebellum development|peristalsis|forebrain development|som…	somatostatin receptor activity|protein binding|PDZ domain binding|	10	0.2	1.42	10	-0.3	0.78	0.2	1.67	0.271	-1.2	1.3	0	0	0
ENSG00000182974	OR4M2	olfactory receptor, family 4, subfamily M, member 2	plasma membrane|integral component of membrane|	G-protein coupled receptor signaling pathway|detection of chemical stimulus involved in sensory perception of smell|	G-protein coupled receptor activity|olfactory receptor activity|	10	-0.2	1.6	10	-1	1.17	-0.1	1.67	0.271	-2	0.5	0	0	0
ENSG00000166819	PLIN1	perilipin 1	endoplasmic reticulum|lipid particle|lipid particle|	lipid metabolic process|triglyceride catabolic process|small molecule metabolic process|	lipid binding|	10	-0.2	0.476	10	-0.2	1.32	-0.2	1.67	0.271	-1.6	0.7	0	0	0
ENSG00000132329	RAMP1	receptor (G protein-coupled) activity modifying protein 1	extracellular space|plasma membrane|plasma membrane|plasma membrane|integral component of plasma membrane|cell surface|receptor complex|	angiogenesis|calcium ion transport|intracellular protein transport|G-protein coupled receptor signaling pathway|regulation of G-protein coupled receptor protein signaling pathway|protein transport|positive regulation of cAMP biosynthetic process|receptor internalization|positive regulation of protein glycosylation|protein localization to plasma membrane|	receptor activity|calcitonin receptor activity|protein binding|protein transporter activity|coreceptor activity|calcitonin receptor binding|	10	0.3	3.28	10	-0.1	0.314	0.2	1.67	0.271	-1.1	1.3	0	0	0
ENSG00000111490	TBC1D30	TBC1 domain family, member 30	plasma membrane|	positive regulation of Rab GTPase activity|	Rab GTPase activator activity|	10	-0.6	1.91	10	-0.2	1.05	-0.4	1.67	0.271	-1.7	0.3	0	0	0
ENSG00000163472	TMEM79	transmembrane protein 79	lysosomal membrane|integral component of membrane|trans-Golgi network membrane|	epithelial cell maturation|regulated secretory pathway|positive regulation of epidermis development|establishment of skin barrier|	None	10	-0.2	0.613	10	0.3	1.28	0.2	1.66	0.272	-1.1	1.3	0	0	0
ENSG00000177275	OR2AJ1	olfactory receptor, family 2, subfamily AJ, member 1	plasma membrane|integral component of membrane|	G-protein coupled receptor signaling pathway|detection of chemical stimulus involved in sensory perception of smell|	G-protein coupled receptor activity|olfactory receptor activity|	10	-0.2	0.579	10	-0.4	1.26	-0.2	1.66	0.272	-1.7	0.5	0	0	0
ENSG00000257115	OR11H12	olfactory receptor, family 11, subfamily H, member 12	plasma membrane|integral component of membrane|	G-protein coupled receptor signaling pathway|detection of chemical stimulus involved in sensory perception of smell|	G-protein coupled receptor activity|olfactory receptor activity|	10	1	0.687	10	0.4	2.72	0.5	1.66	0.272	-0.9	1.9	0	0	0
ENSG00000180708	OR10K2	olfactory receptor, family 10, subfamily K, member 2	plasma membrane|integral component of membrane|	G-protein coupled receptor signaling pathway|detection of chemical stimulus involved in sensory perception of smell|	G-protein coupled receptor activity|olfactory receptor activity|	10	-0.4	2.75	10	0	0	-0.3	1.66	0.272	-1.5	1.1	0	0	0
ENSG00000134755	DSC2	desmocollin 2	plasma membrane|cell-cell adherens junction|intercalated disc|integral component of membrane|desmosome|cytoplasmic vesicle|extracellular vesicular exosome|	cell adhesion|homophilic cell adhesion|ventricular cardiac muscle cell action potential|cardiac muscle cell-cardiac muscle cell adhesion|bundle of His cell to Purkinje myocyte communication|regulation of heart rate by cardiac conduction|	calcium ion binding|protein binding|	10	0.5	0.483	10	-0.3	1.46	-0.2	1.65	0.274	-1.2	1.4	0	0	0
ENSG00000226761	TAS2R46	taste receptor, type 2, member 46	plasma membrane|integral component of membrane|ciliary membrane|	detection of chemical stimulus involved in sensory perception of bitter taste|G-protein coupled receptor signaling pathway|	bitter taste receptor activity|	10	-0.3	2.41	10	0.7	1.37	-0.3	1.65	0.274	-1.4	1.5	0	0	0
ENSG00000132429	POPDC3	popeye domain containing 3	integral component of membrane|	biological_process|	molecular_function|	10	0	0	10	-0.3	3.46	-0.2	1.65	0.274	-1.5	1	0	0	0
ENSG00000174695	TMEM167A	transmembrane protein 167A	Golgi membrane|integral component of membrane|	None	None	4	-0.3	1.21	5	-0.2	0.664	-0.2	1.64	0.276	-1.6	1.7	0	0	0
ENSG00000172209	GPR22	G protein-coupled receptor 22	integral component of plasma membrane|	G-protein coupled receptor signaling pathway|	G-protein coupled receptor activity|	9	-0.4	1.54	9	-0.2	0.622	-0.3	1.64	0.276	-1.6	0.8	0	0	0
ENSG00000186889	TMEM17	transmembrane protein 17	integral component of membrane|ciliary transition zone|TCTN-B9D complex|ciliary membrane|	smoothened signaling pathway|cilium assembly|	None	9	-0.3	1.85	9	-0.1	0.127	-0.2	1.63	0.277	-1.7	0.8	0	0	0
ENSG00000184434	LRRC19	leucine rich repeat containing 19	integral component of membrane|	None	None	10	0.1	0.544	10	-0.6	4.09	-0.3	1.63	0.277	-1.7	0.5	0	0	0
ENSG00000134830	C5AR2	complement component 5a receptor 2	plasma membrane|basal plasma membrane|integral component of membrane|apical part of cell|	chemotaxis|inflammatory response|G-protein coupled receptor signaling pathway|negative regulation of tumor necrosis factor production|positive regulation of epithelial cell proliferation|positive regulation of ERK1 and ERK2 cascade|negative regulation of neutrophil chemotaxis|negative regulation of interleukin-6 secretion|regulation of interleukin-8 secretion|	C5a anaphylatoxin receptor activity|protein binding|	10	0	0	10	0.2	1.95	0.2	1.62	0.278	-0.6	1.6	0	0	0
ENSG00000165762	OR4K2	olfactory receptor, family 4, subfamily K, member 2	plasma membrane|integral component of membrane|	G-protein coupled receptor signaling pathway|detection of chemical stimulus involved in sensory perception of smell|	G-protein coupled receptor activity|olfactory receptor activity|	10	-0.2	0.618	10	-0.3	1.24	-0.2	1.62	0.278	-1	1.7	0	0	0
ENSG00000197454	OR2L5	olfactory receptor, family 2, subfamily L, member 5	plasma membrane|integral component of membrane|	G-protein coupled receptor signaling pathway|biological_process|detection of chemical stimulus involved in sensory perception of smell|	molecular_function|G-protein coupled receptor activity|olfactory receptor activity|	10	-1.8	3.96	10	-0.4	0.49	-1.8	1.62	0.278	-3	0.5	0	0	0
ENSG00000138760	SCARB2	scavenger receptor class B, member 2	lysosomal membrane|lysosomal membrane|membrane|integral component of membrane|lysosomal lumen|extracellular vesicular exosome|	protein targeting to lysosome|cell adhesion|	receptor activity|protein binding|enzyme binding|	10	0.2	2.66	10	-0.1	0.0328	0.2	1.62	0.278	-0.9	1.5	0	0	0
ENSG00000237110	TAAR9	trace amine associated receptor 9 (gene/pseudogene)	plasma membrane|integral component of membrane|	G-protein coupled receptor signaling pathway|	trace-amine receptor activity|G-protein coupled receptor activity|	10	-0.2	0.918	10	-0.2	0.841	-0.2	1.62	0.278	-1.4	1.1	0	0	0
ENSG00000127780	OR1E2	olfactory receptor, family 1, subfamily E, member 2	plasma membrane|integral component of plasma membrane|	signal transduction|G-protein coupled receptor signaling pathway|sensory perception of chemical stimulus|detection of chemical stimulus involved in sensory perception of smell|	receptor activity|G-protein coupled receptor activity|olfactory receptor activity|	10	-0.3	1.24	10	-0.4	0.593	-0.4	1.61	0.28	-1.6	0.7	0	0	0
ENSG00000109158	GABRA4	gamma-aminobutyric acid (GABA) A receptor, alpha 4	plasma membrane|integral component of plasma membrane|cell junction|chloride channel complex|postsynaptic membrane|	transport|gamma-aminobutyric acid signaling pathway|synaptic transmission|central nervous system development|ion transmembrane transport|transmembrane transport|chloride transmembrane transport|regulation of response to drug|	GABA-A receptor activity|extracellular ligand-gated ion channel activity|chloride channel activity|benzodiazepine receptor activity|	10	-0.5	4.43	10	0	0	-0.5	1.6	0.281	-1.3	1.8	0	0	0
ENSG00000164713	BRI3	brain protein I3	integral component of membrane|	None	None	10	0.5	1.77	10	-0.2	0.759	-0.3	1.6	0.281	-1.4	1.3	0	0	0
ENSG00000152092	ASTN1	astrotactin 1	cellular_component|endosome|external side of plasma membrane|integral component of membrane|	neuron migration|neuron cell-cell adhesion|locomotory behavior|	None	10	-0.2	0.201	10	-0.4	2	-0.4	1.6	0.281	-1.8	0.4	0	0	0
ENSG00000164251	F2RL1	coagulation factor II (thrombin) receptor-like 1	Golgi apparatus|plasma membrane|integral component of plasma membrane|pseudopodium|	T cell activation involved in immune response|positive regulation of leukocyte chemotaxis|positive regulation of cytokine secretion involved in immune response|positive regulation of glomerular filtration|inflammatory response|G-protein coupled receptor signaling pathway|positive regulation of cytosolic calcium ion concentration|positive regulation of cytosolic calcium ion concentration|blood coa…	G-protein alpha-subunit binding|receptor activity|G-protein coupled receptor activity|G-protein coupled receptor activity|receptor binding|protein binding|thrombin receptor activity|G-protein beta-subunit binding|	10	-0.3	0.562	10	0.4	1.53	0.2	1.6	0.281	-1	1.5	0	0	0
ENSG00000182631	RXFP3	relaxin/insulin-like family peptide receptor 3	plasma membrane|integral component of plasma membrane|	G-protein coupled receptor signaling pathway|positive regulation of cytokinesis|positive regulation of cytosolic calcium ion concentration involved in phospholipase C-activating G-protein coupled signaling pathway|	G-protein coupled receptor activity|G-protein coupled peptide receptor activity|	10	-0.1	0.469	10	-0.3	1.91	-0.2	1.6	0.281	-1.3	1.2	0	0	0
ENSG00000164300	SERINC5	serine incorporator 5	endoplasmic reticulum membrane|Golgi apparatus|integral component of membrane|myelin sheath|extracellular vesicular exosome|	phosphatidylserine metabolic process|phospholipid biosynthetic process|myelination|positive regulation of transferase activity|	None	10	-0.2	0.572	10	-0.2	1.15	-0.2	1.59	0.283	-1.4	1.1	0	0	0
ENSG00000111796	KLRB1	killer cell lectin-like receptor subfamily B, member 1	plasma membrane|integral component of membrane|	cell surface receptor signaling pathway|	transmembrane signaling receptor activity|carbohydrate binding|	10	0.2	0.77	10	0.2	0.949	0.2	1.59	0.283	-1.2	1.3	0	0	0
ENSG00000166002	SMCO4	single-pass membrane protein with coiled-coil domains 4	cellular_component|integral component of membrane|	biological_process|	molecular_function|	10	0	0	10	-0.4	2.93	-0.2	1.59	0.283	-1.7	0.8	0	0	0
ENSG00000198502	HLA-DRB5	major histocompatibility complex, class II, DR beta 5	Golgi membrane|extracellular space|lysosomal membrane|lysosomal membrane|plasma membrane|external side of plasma membrane|ER to Golgi transport vesicle membrane|membrane|transport vesicle membrane|endocytic vesicle membrane|clathrin-coated endocytic vesicle membrane|late endosome membrane|trans-Golgi network membrane|MHC class II protein complex|MHC class II protein complex|extracellular vesicula…	immunoglobulin production involved in immunoglobulin mediated immune response|inflammatory response to antigenic stimulus|humoral immune response mediated by circulating immunoglobulin|immune response|detection of bacterium|cytokine-mediated signaling pathway|antigen processing and presentation of exogenous peptide antigen via MHC class II|T cell costimulation|regulation of interleukin-4 producti…	peptide antigen binding|	10	0.4	1.96	10	0.1	0.522	0.2	1.59	0.283	-0.8	1.5	0	0	0
ENSG00000056291	NPFFR2	neuropeptide FF receptor 2	plasma membrane|plasma membrane|integral component of plasma membrane|actin cytoskeleton|	G-protein coupled receptor signaling pathway|neuropeptide signaling pathway|detection of abiotic stimulus|regulation of MAPK cascade|regulation of adenylate cyclase activity|regulation of cAMP-dependent protein kinase activity|	G-protein coupled receptor activity|neuropeptide receptor activity|opioid receptor binding|	10	-0.4	1.27	10	-0.2	0.923	-0.2	1.59	0.283	-1.6	0.7	0	0	0
ENSG00000184226	PCDH9	protocadherin 9	plasma membrane|integral component of membrane|	homophilic cell adhesion|forebrain development|	calcium ion binding|	10	0.2	0.221	10	0.2	1.47	0.2	1.58	0.285	-0.7	1.6	0	0	0
ENSG00000239305	RNF103	ring finger protein 103	endoplasmic reticulum|endoplasmic reticulum membrane|integral component of membrane|	central nervous system development|protein ubiquitination|protein ubiquitination|ER-associated ubiquitin-dependent protein catabolic process|	ubiquitin-protein transferase activity|protein binding|zinc ion binding|ligase activity|	8	-0.2	1.81	8	-0.1	0.137	-0.2	1.58	0.285	-1.4	1.5	0	0	0
ENSG00000151572	ANO4	anoctamin 4	intracellular|plasma membrane|plasma membrane|integral component of membrane|	chloride transport|ion transmembrane transport|transmembrane transport|chloride transmembrane transport|	intracellular calcium activated chloride channel activity|	9	0.2	0.552	10	1	3.67	0.2	1.58	0.285	-0.1	2	0	0	0
ENSG00000106025	TSPAN12	tetraspanin 12	integral component of plasma membrane|membrane|integral component of membrane|	angiogenesis|cell surface receptor signaling pathway|retina layer formation|regulation of angiogenesis|	None	10	0.2	1.13	10	0.9	2.26	0.2	1.58	0.285	-0.4	2	0	0	0
ENSG00000183671	GPR1	G protein-coupled receptor 1	integral component of plasma membrane|	G-protein coupled receptor signaling pathway|	G-protein coupled receptor activity|	10	0.2	1.53	10	0.1	0.292	0.2	1.58	0.285	-0.9	1.5	0	0	0
ENSG00000166068	SPRED1	sprouty-related, EVH1 domain containing 1	nucleus|cytoplasm|caveola|	inactivation of MAPK activity|multicellular organismal development|negative regulation of peptidyl-threonine phosphorylation|negative regulation of phosphatase activity|positive regulation of DNA damage response, signal transduction by p53 class mediator|regulation of protein deacetylation|	stem cell factor receptor binding|protein binding|protein kinase binding|phosphatase binding|protein serine/threonine kinase inhibitor activity|	10	0.3	2.1	10	-0.2	0.999	0.2	1.56	0.288	-1	1.4	0	0	0
ENSG00000136040	PLXNC1	plexin C1	intracellular|plasma membrane|membrane|integral component of membrane|	cell adhesion|signal transduction|axon guidance|	receptor activity|receptor binding|protein binding|	10	-0.3	1.72	10	0.3	1.58	-0.3	1.56	0.288	-1.5	0.9	0	0	0
ENSG00000183722	LHFP	lipoma HMGIC fusion partner	integral component of membrane|	None	DNA binding|	10	-0.6	1.94	10	0.1	0.139	-0.4	1.56	0.288	-1.8	0.7	0	0	0
ENSG00000258839	MC1R	melanocortin 1 receptor (alpha melanocyte stimulating hormone receptor)	plasma membrane|plasma membrane|integral component of plasma membrane|	G-protein coupled receptor signaling pathway, coupled to cyclic nucleotide second messenger|multicellular organismal development|UV protection|positive regulation of protein kinase A signaling|sensory perception of pain|positive regulation of cAMP biosynthetic process|negative regulation of tumor necrosis factor production|intracellular signal transduction|melanin biosynthetic process|pigmentatio…	melanocortin receptor activity|melanocyte-stimulating hormone receptor activity|protein binding|G-protein coupled peptide receptor activity|ubiquitin protein ligase binding|	10	0	0	10	0.3	2.86	0.3	1.56	0.288	-0.5	1.7	0	0	0
ENSG00000141316	SPACA3	sperm acrosome associated 3	acrosomal membrane|extracellular region|lysosome|integral component of membrane|secretory granule|	peptidoglycan catabolic process|response to virus|cell wall macromolecule catabolic process|sperm-egg recognition|monocyte activation|positive regulation of macrophage activation|positive regulation of phagocytosis|defense response to Gram-positive bacterium|	lysozyme activity|protein binding|	10	-0.3	1.87	10	-0.1	0.401	-0.2	1.56	0.288	-1.1	1.7	0	0	0
ENSG00000130167	TSPAN16	tetraspanin 16	integral component of membrane|	None	None	10	-0.8	0.936	10	0.3	0.987	0.3	1.55	0.29	-1.9	0.9	0	0	0
ENSG00000196352	CD55	CD55 molecule, decay accelerating factor for complement (Cromer blood group)	extracellular region|plasma membrane|plasma membrane|integral component of plasma membrane|cell surface|apical plasma membrane|anchored component of membrane|membrane raft|extracellular vesicular exosome|	complement activation, classical pathway|positive regulation of cytosolic calcium ion concentration|spermatogenesis|response to virus|response to virus|regulation of complement activation|regulation of lipopolysaccharide-mediated signaling pathway|CD4-positive, alpha-beta T cell cytokine production|negative regulation of catalytic activity|response to peptide hormone|innate immune response|respir…	virus receptor activity|enzyme inhibitor activity|protein binding|lipid binding|	10	0.8	0.696	10	0.2	1.36	0.2	1.55	0.29	-0.3	1.9	0	0	0
ENSG00000152954	NRSN1	neurensin 1	integral component of membrane|cytoplasmic membrane-bounded vesicle|transport vesicle|growth cone|neuron projection|neuronal cell body|	nervous system development|	None	10	-0.3	2.2	10	0.8	0.83	-0.2	1.55	0.29	-1.1	1.7	0	0	0
ENSG00000175161	CADM2	cell adhesion molecule 2	cytoplasm|plasma membrane|integral component of membrane|cell junction|axon|neuronal cell body membrane|synapse|	cell adhesion|brain development|cell junction assembly|adherens junction organization|cell-cell junction organization|	None	10	-0.1	0.232	10	0.2	1.58	0.2	1.55	0.29	-1	1.5	0	0	0
ENSG00000174564	IL20RB	interleukin 20 receptor beta	integral component of membrane|	negative regulation of type IV hypersensitivity|inflammatory response to antigenic stimulus|immune response-inhibiting signal transduction|negative regulation of interferon-gamma production|negative regulation of interleukin-2 production|positive regulation of interleukin-10 production|positive regulation of interleukin-4 production|negative regulation of T cell proliferation|homeostasis of numbe…	interleukin-20 binding|	10	0.1	0.131	10	-0.4	2.87	-0.3	1.55	0.29	-1.6	0.9	0	0	0
ENSG00000173302	GPR148	G protein-coupled receptor 148	plasma membrane|integral component of membrane|	G-protein coupled receptor signaling pathway|	G-protein coupled receptor activity|	10	-0.3	1	10	-0.2	0.693	-0.3	1.55	0.29	-1.6	0.7	0	0	0
ENSG00000134061	CD180	CD180 molecule	plasma membrane|integral component of membrane|	B cell proliferation involved in immune response|inflammatory response|positive regulation of lipopolysaccharide-mediated signaling pathway|innate immune response|cellular response to lipopolysaccharide|	None	10	-0.2	1.48	10	-0.1	0.604	-0.2	1.54	0.291	-1.8	0.5	0	0	0
ENSG00000187258	NPSR1	neuropeptide S receptor 1	cytoplasm|plasma membrane|integral component of membrane|	neuropeptide signaling pathway|	vasopressin receptor activity|neuropeptide receptor activity|	10	0.8	1.3	10	-0.2	1.94	-0.2	1.53	0.293	-1.5	1.7	0	0	0
ENSG00000181001	OR52N1	olfactory receptor, family 52, subfamily N, member 1	plasma membrane|integral component of membrane|	G-protein coupled receptor signaling pathway|detection of chemical stimulus involved in sensory perception of smell|	G-protein coupled receptor activity|olfactory receptor activity|	10	-0.4	3.57	10	0	0	-0.3	1.53	0.293	-1.7	0.6	0	0	0
ENSG00000166575	TMEM135	transmembrane protein 135	peroxisome|integral component of membrane|	peroxisome organization|	None	10	-0.4	2.34	10	0.3	0.937	-0.3	1.53	0.293	-1.4	1	0	0	0
ENSG00000198133	TMEM229B	transmembrane protein 229B	integral component of membrane|	None	None	10	0.3	3.12	10	0	0	0.3	1.53	0.293	-0.9	1.5	0	0	0
ENSG00000181409	AATK	apoptosis-associated tyrosine kinase	endoplasmic reticulum|integral component of membrane|axonal growth cone|perinuclear region of cytoplasm|recycling endosome|	brain development|negative regulation of axon extension|Rab protein signal transduction|peptidyl-tyrosine autophosphorylation|neuron apoptotic process|	protein serine/threonine kinase activity|protein tyrosine kinase activity|protein binding|ATP binding|	10	-1.3	1.27	10	0.3	2.55	0.2	1.52	0.294	-2	0.9	0	0	0
ENSG00000165300	SLITRK5	SLIT and NTRK-like family, member 5	integral component of membrane|receptor complex|	synaptic transmission|axonogenesis|grooming behavior|response to xenobiotic stimulus|striatum development|adult behavior|skin development|dendrite morphogenesis|cardiovascular system development|	None	10	-0.2	0.402	10	-0.4	1.44	-0.2	1.52	0.294	-1.5	0.8	0	0	0
ENSG00000181761	OR8H3	olfactory receptor, family 8, subfamily H, member 3	plasma membrane|integral component of membrane|	G-protein coupled receptor signaling pathway|detection of chemical stimulus involved in sensory perception of smell|	G-protein coupled receptor activity|olfactory receptor activity|	10	0.3	3.4	10	0	0	0.3	1.52	0.294	-0.9	1.4	0	0	0
ENSG00000088812	ATRN	attractin	extracellular space|cytoplasm|plasma membrane|integral component of plasma membrane|extracellular vesicular exosome|	inflammatory response|response to oxidative stress|cerebellum development|regulation of multicellular organism growth|myelination|pigmentation|	receptor activity|carbohydrate binding|	10	0	0	10	-0.8	4.47	-0.8	1.51	0.296	-2	0.3	0	0	0
ENSG00000172154	OR8I2	olfactory receptor, family 8, subfamily I, member 2	plasma membrane|integral component of membrane|	G-protein coupled receptor signaling pathway|detection of chemical stimulus involved in sensory perception of smell|	G-protein coupled receptor activity|olfactory receptor activity|	10	-0.3	0.529	10	-0.3	1.11	-0.3	1.51	0.296	-1.3	1.6	0	0	0
ENSG00000158156	XKR8	XK, Kell blood group complex subunit-related family, member 8	plasma membrane|integral component of membrane|	engulfment of apoptotic cell|phosphatidylserine exposure on apoptotic cell surface|	None	10	0.2	1.72	10	-0.2	1.34	0.2	1.51	0.296	-1.5	1	0	0	0
ENSG00000137842	TMEM62	transmembrane protein 62	integral component of membrane|	None	None	10	-0.2	0.386	10	-0.2	1.24	-0.2	1.51	0.296	-1.2	1.4	0	0	0
ENSG00000144583	2020-03-04	membrane-associated ring finger (C3HC4) 4, E3 ubiquitin protein ligase	Golgi membrane|Golgi stack|trans-Golgi network|integral component of membrane|	protein ubiquitination|	ubiquitin-protein transferase activity|zinc ion binding|ligase activity|	10	-0.6	4.19	10	0.3	1.27	-0.5	1.51	0.296	-1.7	1	0	0	0
ENSG00000113327	GABRG2	gamma-aminobutyric acid (GABA) A receptor, gamma 2	cytoplasm|plasma membrane|integral component of plasma membrane|cell junction|axon|dendrite membrane|chloride channel complex|postsynaptic membrane|inhibitory synapse|GABA-A receptor complex|	transport|gamma-aminobutyric acid signaling pathway|synaptic transmission|post-embryonic development|adult behavior|ion transmembrane transport|synaptic transmission, GABAergic|transmembrane transport|cellular response to histamine|chloride transmembrane transport|chloride transmembrane transport|	GABA-A receptor activity|extracellular ligand-gated ion channel activity|chloride channel activity|protein binding|benzodiazepine receptor activity|	10	0	0	10	0.9	2.97	0.5	1.5	0.298	-0.2	2	0	0	0
ENSG00000067182	TNFRSF1A	tumor necrosis factor receptor superfamily, member 1A	Golgi membrane|extracellular region|extracellular space|nucleus|plasma membrane|integral component of plasma membrane|cell surface|axon|receptor complex|membrane raft|	response to hypoxia|prostaglandin metabolic process|apoptotic process|inflammatory response|extrinsic apoptotic signaling pathway via death domain receptors|intrinsic apoptotic signaling pathway in response to DNA damage|negative regulation of gene expression|viral process|cytokine-mediated signaling pathway|response to lipopolysaccharide|negative regulation of interleukin-6 production|positive r…	protease binding|tumor necrosis factor-activated receptor activity|protein binding|protein complex binding|tumor necrosis factor binding|	10	-0.8	1.52	10	-0.3	0.58	-0.2	1.5	0.298	-1.9	0.3	0	0	0
ENSG00000177042	TMEM80	transmembrane protein 80	integral component of membrane|	None	None	10	0.1	0.111	10	0.8	1.61	0.7	1.5	0.298	-1.2	1.9	0	0	0
ENSG00000163507	KIAA1524	KIAA1524	cytoplasm|plasma membrane|integral component of membrane|	None	protein binding|	10	-0.3	1	10	0.5	2.41	0.5	1.5	0.298	-1.3	1.5	0	0	0
ENSG00000178789	CD300LB	CD300 molecule-like family member b	plasma membrane|integral component of membrane|	innate immune response|	None	10	0.2	0.45	10	-0.2	2.16	-0.2	1.5	0.298	-1.4	1.1	0	0	0
ENSG00000171459	OR1L6	olfactory receptor, family 1, subfamily L, member 6	plasma membrane|integral component of membrane|	G-protein coupled receptor signaling pathway|detection of chemical stimulus involved in sensory perception of smell|	G-protein coupled receptor activity|olfactory receptor activity|	10	0.3	2.93	10	-0.1	0.187	0.2	1.49	0.299	-1.1	1.4	0	0	0
ENSG00000127990	SGCE	sarcoglycan, epsilon	Golgi apparatus|cytoskeleton|plasma membrane|integral component of plasma membrane|dystrophin-associated glycoprotein complex|sarcoglycan complex|dendrite|dendrite membrane|sarcolemma|	cell-matrix adhesion|muscle organ development|	calcium ion binding|	10	0.4	1.52	10	0.2	0.333	0.3	1.49	0.299	-0.6	1.7	0	0	0
ENSG00000176540	OR4C5	olfactory receptor, family 4, subfamily C, member 5	plasma membrane|integral component of membrane|	G-protein coupled receptor signaling pathway|detection of chemical stimulus involved in sensory perception of smell|	G-protein coupled receptor activity|olfactory receptor activity|	10	-0.4	3.29	10	0.5	2.13	-0.4	1.49	0.299	-1.7	1.2	0	0	0
ENSG00000075073	TACR2	tachykinin receptor 2	plasma membrane|integral component of plasma membrane|	muscle contraction|tachykinin receptor signaling pathway|excretion|positive regulation of acetylcholine secretion, neurotransmission|intestine smooth muscle contraction|negative regulation of luteinizing hormone secretion|operant conditioning|positive regulation of vascular permeability|prolactin secretion|positive regulation of uterine smooth muscle contraction|	tachykinin receptor activity|protein binding|substance K receptor activity|	10	0.6	0.705	10	0.2	0.907	0.2	1.49	0.299	-0.9	1.7	0	0	0
ENSG00000160593	AMICA1	adhesion molecule, interacts with CXADR antigen 1	plasma membrane|plasma membrane|tight junction|integral component of membrane|	heterophilic cell-cell adhesion|heterophilic cell-cell adhesion|blood coagulation|neutrophil chemotaxis|monocyte extravasation|gamma-delta T cell activation|regulation of immune response|leukocyte migration|positive regulation of epithelial cell proliferation involved in wound healing|neutrophil extravasation|	integrin binding|protein homodimerization activity|cell adhesion molecule binding|	10	0.2	0.654	10	-0.3	1.34	-0.3	1.49	0.299	-1.6	0.7	0	0	0
ENSG00000158258	CLSTN2	calsyntenin 2	Golgi membrane|endoplasmic reticulum membrane|integral component of membrane|postsynaptic membrane|	homophilic cell adhesion|	calcium ion binding|	10	0.3	3.36	10	-0.1	0.486	0.2	1.49	0.299	-0.7	1.6	0	0	0
ENSG00000237388	OR4A47	olfactory receptor, family 4, subfamily A, member 47	plasma membrane|integral component of membrane|	G-protein coupled receptor signaling pathway|detection of chemical stimulus involved in sensory perception of smell|	G-protein coupled receptor activity|olfactory receptor activity|	10	0.1	0.106	10	-0.3	2.65	-0.3	1.49	0.299	-1.4	1	0	0	0
ENSG00000187080	OR2AK2	olfactory receptor, family 2, subfamily AK, member 2	plasma membrane|integral component of membrane|	G-protein coupled receptor signaling pathway|detection of chemical stimulus involved in sensory perception of smell|	G-protein coupled receptor activity|olfactory receptor activity|	10	-1.2	0.9	10	0.2	1.63	0.2	1.48	0.301	-2	0.8	0	0	0
ENSG00000124334	IL9R	interleukin 9 receptor	extracellular space|integral component of plasma membrane|	signal transduction|cell proliferation|positive regulation of cell growth|interleukin-9-mediated signaling pathway|	interleukin-9 receptor activity|interleukin-9 binding|	10	0.2	1.05	10	0.7	1.05	0.2	1.48	0.301	-0.7	1.8	0	0	0
ENSG00000221813	OR6B1	olfactory receptor, family 6, subfamily B, member 1	plasma membrane|integral component of membrane|	G-protein coupled receptor signaling pathway|detection of chemical stimulus involved in sensory perception of smell|	G-protein coupled receptor activity|olfactory receptor activity|	10	-0.4	3.67	10	0.3	0.953	-0.4	1.48	0.301	-1.5	0.9	0	0	0
ENSG00000159618	GPR114	G protein-coupled receptor 114	plasma membrane|integral component of membrane|	G-protein coupled receptor signaling pathway|neuropeptide signaling pathway|	G-protein coupled receptor activity|	10	-0.4	1.35	10	-0.1	0.434	-0.2	1.48	0.301	-1.6	1	0	0	0
ENSG00000160801	PTH1R	parathyroid hormone 1 receptor	nucleus|cytoplasm|plasma membrane|integral component of plasma membrane|basolateral plasma membrane|apical plasma membrane|brush border membrane|receptor complex|extracellular vesicular exosome|	skeletal system development|chondrocyte differentiation|osteoblast development|G-protein coupled receptor signaling pathway|G-protein coupled receptor signaling pathway, coupled to cyclic nucleotide second messenger|adenylate cyclase-modulating G-protein coupled receptor signaling pathway|adenylate cyclase-activating G-protein coupled receptor signaling pathway|phospholipase C-activating G-protei…	parathyroid hormone receptor activity|protein binding|peptide hormone binding|protein self-association|	9	0.2	0.554	9	0.5	1.77	0.2	1.48	0.301	-1.3	1.6	0	0	0
ENSG00000137261	KIAA0319	KIAA0319	early endosome|plasma membrane|integral component of membrane|early endosome membrane|	neuron migration|negative regulation of dendrite development|	protein binding|	10	0.2	0.561	10	0.5	1.98	0.3	1.48	0.301	-0.7	1.6	0	0	0
ENSG00000162618	ELTD1	EGF, latrophilin and seven transmembrane domain containing 1	plasma membrane|integral component of membrane|	G-protein coupled receptor signaling pathway|neuropeptide signaling pathway|	G-protein coupled receptor activity|calcium ion binding|protein dimerization activity|	10	-1	2.69	10	0.2	0.869	0.2	1.47	0.303	-1.8	1.1	0	0	0
ENSG00000169330	KIAA1024	KIAA1024	integral component of membrane|	None	None	10	-0.4	2.15	10	0	0	-0.3	1.47	0.303	-1.8	0.3	0	0	0
ENSG00000184601	C14ORF180	chromosome 14 open reading frame 180	plasma membrane|integral component of membrane|	None	None	10	0.1	0.101	10	-1	3.3	-0.2	1.47	0.303	-2	0.3	0	0	0
ENSG00000167664	TMIGD2	transmembrane and immunoglobulin domain containing 2	plasma membrane|integral component of membrane|	positive regulation of cytokine production|signal transduction|T cell costimulation|positive regulation of activated T cell proliferation|	protein binding|coreceptor activity|	10	0.3	1.72	10	0.1	0.387	0.2	1.46	0.304	-0.7	1.6	0	0	0
ENSG00000221840	OR4A5	olfactory receptor, family 4, subfamily A, member 5	plasma membrane|integral component of membrane|	G-protein coupled receptor signaling pathway|detection of chemical stimulus involved in sensory perception of smell|	G-protein coupled receptor activity|olfactory receptor activity|	10	-0.4	1.65	10	-0.1	0.576	-0.2	1.46	0.304	-1.5	1	0	0	0
ENSG00000129048	ACKR4	atypical chemokine receptor 4	early endosome|plasma membrane|integral component of plasma membrane|recycling endosome|	receptor-mediated endocytosis|chemotaxis|immune response|G-protein coupled receptor signaling pathway|chemokine-mediated signaling pathway|chemokine-mediated signaling pathway|chemokine-mediated signaling pathway|	chemokine receptor activity|scavenger receptor activity|protein binding|chemokine binding|	10	0.6	1	10	-0.5	1.5	0.3	1.46	0.304	-1.2	1.5	0	0	0
ENSG00000176495	OR5AN1	olfactory receptor, family 5, subfamily AN, member 1	plasma membrane|integral component of membrane|	G-protein coupled receptor signaling pathway|detection of chemical stimulus involved in sensory perception of smell|	G-protein coupled receptor activity|olfactory receptor activity|	10	-0.1	0.383	10	-1.3	3.67	-0.1	1.46	0.304	-2	0.6	0	0	0
ENSG00000271092	TMEM56-RWDD3	TMEM56-RWDD3 readthrough	None	None	None	4	0.4	1.46	4	0.2	0.363	0.3	1.46	0.304	-1.2	2	0	0	0
ENSG00000160767	FAM189B	family with sequence similarity 189, member B	integral component of membrane|	biological_process|	protein binding|WW domain binding|	9	0.2	2.04	9	0	0	0.2	1.46	0.304	-1.7	1.2	0	0	0
ENSG00000204969	PCDHA2	protocadherin alpha 2	integral component of plasma membrane|	cell adhesion|homophilic cell adhesion|nervous system development|	calcium ion binding|	10	-0.3	1.38	10	-0.1	0.764	-0.2	1.46	0.304	-1.8	0.5	0	0	0
ENSG00000100368	CSF2RB	colony stimulating factor 2 receptor, beta, low-affinity (granulocyte-macrophage)	plasma membrane|integral component of plasma membrane|granulocyte macrophage colony-stimulating factor receptor complex|	signal transduction|respiratory gaseous exchange|response to lipopolysaccharide|cellular response to interleukin-3|interleukin-5-mediated signaling pathway|interleukin-3-mediated signaling pathway|	receptor activity|interleukin-3 receptor activity|interleukin-5 receptor activity|protein binding|	10	0.8	0.394	10	-0.2	2.15	-0.2	1.46	0.304	-1.2	1.7	0	0	0
ENSG00000144749	LRIG1	leucine-rich repeats and immunoglobulin-like domains 1	integral component of membrane|	None	None	10	0.3	2.06	10	-0.1	0.0563	0.2	1.46	0.304	-0.6	1.8	0	0	0
ENSG00000176198	OR11H4	olfactory receptor, family 11, subfamily H, member 4	plasma membrane|integral component of membrane|	G-protein coupled receptor signaling pathway|detection of chemical stimulus involved in sensory perception of smell|	G-protein coupled receptor activity|olfactory receptor activity|	10	-0.4	1.54	10	-0.1	0.408	-0.2	1.45	0.306	-1.5	1.3	0	0	0
ENSG00000163328	GPR155	G protein-coupled receptor 155	integral component of membrane|extracellular vesicular exosome|	intracellular signal transduction|cognition|transmembrane transport|	molecular_function|	10	0.4	2.13	10	0.1	0.126	0.2	1.45	0.306	-1.1	1.6	0	0	0
ENSG00000150261	OR8K1	olfactory receptor, family 8, subfamily K, member 1	plasma membrane|integral component of membrane|	G-protein coupled receptor signaling pathway|detection of chemical stimulus involved in sensory perception of smell|	G-protein coupled receptor activity|olfactory receptor activity|	9	0.2	0.802	9	0.2	0.775	0.2	1.45	0.306	-1	1.6	0	0	0
ENSG00000070886	EPHA8	EPH receptor A8	integral component of plasma membrane|early endosome membrane|neuron projection|	substrate-dependent cell migration|cell adhesion|axon guidance|neuron remodeling|peptidyl-tyrosine phosphorylation|regulation of cell adhesion|neuron projection development|regulation of cell adhesion mediated by integrin|positive regulation of MAPK cascade|positive regulation of phosphatidylinositol 3-kinase activity|protein autophosphorylation|ephrin receptor signaling pathway|	GPI-linked ephrin receptor activity|ATP binding|	10	-0.1	0.264	10	-0.3	1.8	-0.2	1.45	0.306	-1.4	1.2	0	0	0
ENSG00000101384	JAG1	jagged 1	extracellular region|plasma membrane|plasma membrane|integral component of plasma membrane|membrane|apical part of cell|	angiogenesis|cell fate determination|morphogenesis of an epithelial sheet|T cell mediated immunity|pulmonary valve morphogenesis|cardiac right ventricle morphogenesis|Notch signaling pathway|Notch signaling pathway|Notch signaling pathway|Notch receptor processing|nervous system development|hemopoiesis|keratinocyte differentiation|regulation of cell migration|response to muramyl dipeptide|aorta m…	Notch binding|structural molecule activity|calcium ion binding|protein binding|growth factor activity|	10	0	0	10	-0.4	2.19	-0.2	1.45	0.306	-1.7	0.4	0	0	0
ENSG00000164325	TMEM174	transmembrane protein 174	endoplasmic reticulum membrane|integral component of membrane|	None	None	10	-0.1	0.692	10	0.9	4.1	-0.2	1.45	0.306	-0.4	2	0	0	0
ENSG00000145014	TMEM44	transmembrane protein 44	integral component of membrane|	None	None	10	0.2	0.786	10	0.2	0.783	0.2	1.45	0.306	-0.8	1.6	0	0	0
ENSG00000159596	TMEM69	transmembrane protein 69	integral component of membrane|	None	None	10	0.7	1.6	10	0.1	0.389	0.2	1.45	0.306	-0.7	1.9	0	0	0
ENSG00000198178	CLEC4C	C-type lectin domain family 4, member C	integral component of membrane|	innate immune response|	carbohydrate binding|	10	-0.2	0.688	10	-0.6	2.02	-0.3	1.45	0.306	-1.8	0.4	0	0	0
ENSG00000165949	IFI27	interferon, alpha-inducible protein 27	mitochondrion|mitochondrial outer membrane|integral component of membrane|	activation of cysteine-type endopeptidase activity involved in apoptotic process|cytokine-mediated signaling pathway|type I interferon signaling pathway|apoptotic signaling pathway|	molecular_function|	10	0.3	2.25	10	0	0	0.3	1.44	0.307	-1.9	1	0	0	0
ENSG00000112852	PCDHB2	protocadherin beta 2	integral component of plasma membrane|integral component of membrane|	cell adhesion|homophilic cell adhesion|synaptic transmission|nervous system development|synapse assembly|calcium-dependent cell-cell adhesion|	calcium ion binding|	10	0.1	0.0435	10	-0.3	2.69	-0.2	1.44	0.307	-1.7	0.6	0	0	0
ENSG00000184954	OR6C70	olfactory receptor, family 6, subfamily C, member 70	plasma membrane|integral component of membrane|	G-protein coupled receptor signaling pathway|detection of chemical stimulus involved in sensory perception of smell|	G-protein coupled receptor activity|olfactory receptor activity|	10	-0.4	0.71	10	-0.5	0.85	-0.5	1.44	0.307	-1.7	0.7	0	0	0
ENSG00000179639	FCER1A	Fc fragment of IgE, high affinity I, receptor for; alpha polypeptide	plasma membrane|integral component of plasma membrane|external side of plasma membrane|cell surface|	positive regulation of type I hypersensitivity|serotonin secretion|activation of JUN kinase activity|leukotriene biosynthetic process|Fc-epsilon receptor signaling pathway|positive regulation of mast cell degranulation|innate immune response|positive regulation of interleukin-3 biosynthetic process|positive regulation of granulocyte macrophage colony-stimulating factor biosynthetic process|positi…	IgE receptor activity|IgE binding|	10	0.4	0.972	10	0.2	1.05	0.2	1.43	0.309	-0.9	1.5	0	0	0
ENSG00000153029	MR1	major histocompatibility complex, class I-related	extracellular region|endoplasmic reticulum|endoplasmic reticulum membrane|integral component of membrane|MHC class I protein complex|	positive regulation of T cell mediated cytotoxicity|cytokine production involved in immune response|antigen processing and presentation of peptide antigen via MHC class I|immune response|signal transduction|interleukin-1 beta production|interleukin-17 production|innate immune response|defense response to Gram-negative bacterium|	MHC class I receptor activity|peptide antigen binding|	10	0.5	2.36	10	-0.5	0.739	0.3	1.43	0.309	-1.1	1.6	0	0	0
ENSG00000162009	SSTR5	somatostatin receptor 5	plasma membrane|integral component of plasma membrane|	G-protein coupled receptor signaling pathway|G-protein coupled receptor signaling pathway, coupled to cyclic nucleotide second messenger|negative regulation of cell proliferation|positive regulation of cytokinesis|somatostatin signaling pathway|somatostatin signaling pathway|glucose homeostasis|regulation of insulin secretion|	somatostatin receptor activity|	10	-0.3	3.31	10	0.1	0.467	-0.3	1.43	0.309	-1.5	0.9	0	0	0
ENSG00000110448	CD5	CD5 molecule	plasma membrane|integral component of plasma membrane|external side of plasma membrane|	receptor-mediated endocytosis|cell recognition|cell proliferation|T cell costimulation|apoptotic signaling pathway|	receptor activity|transmembrane signaling receptor activity|scavenger receptor activity|protein binding|	10	-0.2	0.703	10	0.2	1.34	0.2	1.43	0.309	-0.9	1.6	0	0	0
ENSG00000145794	MEGF10	multiple EGF-like-domains 10	phagocytic cup|integral component of membrane|basolateral plasma membrane|cell projection|	skeletal muscle satellite cell activation|skeletal muscle satellite cell differentiation|skeletal muscle satellite cell proliferation|homotypic cell-cell adhesion|recognition of apoptotic cell|regulation of skeletal muscle tissue development|regulation of muscle cell differentiation|muscle cell development|	None	10	-0.5	1.16	10	-0.2	0.772	-0.2	1.43	0.309	-1.8	0.5	0	0	0
ENSG00000244476	ERVFRD-1	endogenous retrovirus group FRD, member 1	plasma membrane|integral component of membrane|viral envelope|	syncytium formation|	None	10	0.1	0.788	10	0.1	0.767	0.1	1.43	0.309	-1.2	1.4	0	0	0
ENSG00000134258	VTCN1	V-set domain containing T cell activation inhibitor 1	external side of plasma membrane|integral component of membrane|	response to protozoan|immune system process|negative regulation of T cell activation|interleukin-4 secretion|interferon-gamma secretion|	receptor binding|	10	0.1	0.107	10	-0.3	1.54	-0.3	1.42	0.31	-1.5	0.9	0	0	0
ENSG00000172362	OR5B12	olfactory receptor, family 5, subfamily B, member 12	plasma membrane|integral component of membrane|	G-protein coupled receptor signaling pathway|detection of chemical stimulus involved in sensory perception of smell|	G-protein coupled receptor activity|olfactory receptor activity|	10	-0.1	0.96	10	-0.2	0.601	-0.2	1.42	0.31	-1.6	0.9	0	0	0
ENSG00000170647	TMEM133	transmembrane protein 133	integral component of membrane|	None	None	10	-0.1	0.61	10	-0.3	1.09	-0.2	1.42	0.31	-1.1	1.7	0	0	0
ENSG00000131042	LILRB2	leukocyte immunoglobulin-like receptor, subfamily B (with TM and ITIM domains), member 2	extracellular space|cytoplasm|plasma membrane|integral component of plasma membrane|cell surface|membrane|	negative regulation of antigen processing and presentation|positive regulation of T cell tolerance induction|immune response-inhibiting cell surface receptor signaling pathway|immune response-inhibiting cell surface receptor signaling pathway|Fc receptor mediated inhibitory signaling pathway|immune response|cellular defense response|signal transduction|signal transduction|cell surface receptor si…	receptor activity|protein binding|protein phosphatase 1 binding|MHC class Ib protein binding|inhibitory MHC class I receptor activity|inhibitory MHC class I receptor activity|MHC class I protein binding|MHC class I protein binding|cell adhesion molecule binding|	9	-0.3	2.08	10	0	0	-0.2	1.41	0.312	-1.6	0.9	0	0	0
ENSG00000167822	OR8J3	olfactory receptor, family 8, subfamily J, member 3	plasma membrane|integral component of membrane|	G-protein coupled receptor signaling pathway|detection of chemical stimulus involved in sensory perception of smell|	G-protein coupled receptor activity|olfactory receptor activity|	10	-0.7	0.767	10	-0.3	1.08	-0.3	1.41	0.312	-1.7	1.2	0	0	0
ENSG00000271321	CTAGE6	CTAGE family, member 6	cellular_component|integral component of membrane|	biological_process|	None	3	-0.3	1.19	3	-0.2	0.536	-0.2	1.41	0.312	-2	1.3	0	0	0
ENSG00000078795	PKD2L2	polycystic kidney disease 2-like 2	integral component of membrane|	biological_process|detection of mechanical stimulus|calcium ion transmembrane transport|	calcium channel activity|calcium ion binding|	10	0.1	0.575	10	-0.3	2.81	-0.3	1.41	0.312	-1.2	1.5	0	0	0
ENSG00000184500	PROS1	protein S (alpha)	Golgi membrane|extracellular region|extracellular region|extracellular space|endoplasmic reticulum membrane|Golgi lumen|platelet alpha granule lumen|blood microparticle|	platelet degranulation|proteolysis|blood coagulation|negative regulation of endopeptidase activity|peptidyl-glutamic acid carboxylation|platelet activation|regulation of complement activation|fibrinolysis|post-translational protein modification|cellular protein metabolic process|innate immune response|leukocyte migration|	endopeptidase inhibitor activity|calcium ion binding|	10	0	0	10	0.3	1.9	0.3	1.41	0.312	-0.5	1.8	0	0	0
ENSG00000160539	PPAPDC3	phosphatidic acid phosphatase type 2 domain containing 3	nuclear envelope|endoplasmic reticulum membrane|integral component of membrane|	metabolic process|negative regulation of myotube differentiation|	hydrolase activity|	10	0.3	1.91	10	0	0	0.2	1.41	0.312	-0.7	1.7	0	0	0
ENSG00000174944	P2RY14	purinergic receptor P2Y, G-protein coupled, 14	plasma membrane|integral component of membrane|	G-protein coupled receptor signaling pathway|G-protein coupled purinergic nucleotide receptor signaling pathway|	G-protein coupled purinergic nucleotide receptor activity|UDP-activated nucleotide receptor activity|	10	0.2	0.172	10	0.3	1.59	0.2	1.41	0.312	-1.5	1.3	0	0	0
ENSG00000176219	OR11H6	olfactory receptor, family 11, subfamily H, member 6	plasma membrane|integral component of membrane|	G-protein coupled receptor signaling pathway|detection of chemical stimulus involved in sensory perception of smell|	G-protein coupled receptor activity|olfactory receptor activity|	10	-0.3	0.398	10	0.4	1.99	0.3	1.4	0.314	-1	1.4	0	0	0
ENSG00000183723	CMTM4	CKLF-like MARVEL transmembrane domain containing 4	extracellular space|integral component of membrane|	chemotaxis|	cytokine activity|	10	0.2	0.521	10	0.3	1.17	0.2	1.4	0.314	-0.9	1.6	0	0	0
ENSG00000110195	FOLR1	folate receptor 1 (adult)	endosome|plasma membrane|integral component of plasma membrane|membrane|apical plasma membrane|clathrin-coated vesicle|anchored component of external side of plasma membrane|brush border membrane|extracellular vesicular exosome|	receptor-mediated endocytosis|cell death|folic acid transport|folic acid metabolic process|	receptor activity|folic acid binding|folic acid binding|folic acid transporter activity|	10	0.1	0.0507	10	1	2.64	0.9	1.4	0.314	-0.7	2	0	0	0
ENSG00000163683	SMIM14	small integral membrane protein 14	endoplasmic reticulum|endoplasmic reticulum membrane|integral component of membrane|	None	None	10	0	0	10	0.2	1.94	0.2	1.4	0.314	-1.3	1.3	0	0	0
ENSG00000187612	OR5W2	olfactory receptor, family 5, subfamily W, member 2	plasma membrane|integral component of membrane|	G-protein coupled receptor signaling pathway|detection of chemical stimulus involved in sensory perception of smell|	G-protein coupled receptor activity|olfactory receptor activity|	10	-0.5	1.25	10	-0.2	0.625	-0.3	1.4	0.314	-1.5	0.9	0	0	0
ENSG00000166159	LRTM2	leucine-rich repeats and transmembrane domains 2	integral component of membrane|	None	None	10	-0.3	1.75	10	0.8	2.24	-0.2	1.4	0.314	-1.2	1.7	0	0	0
ENSG00000089916	GPATCH2L	G patch domain containing 2-like	None	None	protein binding|	10	0	0	10	-0.4	3.56	-0.4	1.39	0.316	-2	0.3	0	0	0
ENSG00000177186	OR2M7	olfactory receptor, family 2, subfamily M, member 7	plasma membrane|integral component of membrane|	G-protein coupled receptor signaling pathway|detection of chemical stimulus involved in sensory perception of smell|	G-protein coupled receptor activity|olfactory receptor activity|	10	0	0	10	1	4.36	0.9	1.39	0.316	-0.3	2	0	0	0
ENSG00000214597	TMEM249	transmembrane protein 249	integral component of membrane|	None	None	10	-0.3	1.13	10	-0.2	0.385	-0.2	1.39	0.316	-1.6	0.8	0	0	0
ENSG00000180090	OR3A1	olfactory receptor, family 3, subfamily A, member 1	plasma membrane|integral component of membrane|	signal transduction|G-protein coupled receptor signaling pathway|detection of chemical stimulus involved in sensory perception of smell|detection of chemical stimulus involved in sensory perception of smell|	G-protein coupled receptor activity|olfactory receptor activity|	10	-0.2	1.19	10	-0.2	0.301	-0.2	1.39	0.316	-1.4	1.1	0	0	0
ENSG00000138614	VWA9	von Willebrand factor A domain containing 9	None	None	None	10	0.4	2.42	10	-0.5	3.71	-0.4	1.39	0.316	-1.5	1	0	0	0
ENSG00000197479	PCDHB11	protocadherin beta 11	integral component of plasma membrane|integral component of membrane|	cell adhesion|homophilic cell adhesion|synaptic transmission|nervous system development|synapse assembly|calcium-dependent cell-cell adhesion|	calcium ion binding|	10	-1.4	3.71	10	0.3	2.24	-0.2	1.39	0.316	-2	0.6	0	0	0
ENSG00000112902	SEMA5A	sema domain, seven thrombospondin repeats (type 1 and type 1-like), transmembrane domain (TM) and short cytoplasmic domain, (semaphorin) 5A	plasma membrane|membrane|integral component of membrane|extracellular vesicular exosome|	patterning of blood vessels|positive regulation of endothelial cell proliferation|blood vessel endothelial cell proliferation involved in sprouting angiogenesis|cell adhesion|negative regulation of cell adhesion|cell-cell signaling|nervous system development|axon guidance|axonal fasciculation|diencephalon development|positive regulation of actin filament depolymerization|positive regulation of ca…	axon guidance receptor activity|semaphorin receptor binding|chondroitin sulfate proteoglycan binding|heparan sulfate proteoglycan binding|syndecan binding|	10	-0.3	0.92	10	-1.5	2.99	-0.3	1.38	0.318	-3	0.2	0	0	0
ENSG00000174456	C12ORF76	chromosome 12 open reading frame 76	None	None	None	10	0.2	1.75	10	0.1	0.135	0.2	1.38	0.318	-1.3	1.4	0	0	0
ENSG00000182613	OR2V2	olfactory receptor, family 2, subfamily V, member 2	plasma membrane|integral component of membrane|	G-protein coupled receptor signaling pathway|detection of chemical stimulus involved in sensory perception of smell|	G-protein coupled receptor activity|olfactory receptor activity|	10	-0.3	1.64	10	0.1	0.38	-0.3	1.38	0.318	-1.7	0.8	0	0	0
ENSG00000088053	GP6	glycoprotein VI (platelet)	plasma membrane|integral component of plasma membrane|extracellular vesicular exosome|	enzyme linked receptor protein signaling pathway|blood coagulation|platelet activation|platelet activation|leukocyte migration|	receptor activity|transmembrane signaling receptor activity|protein binding|collagen binding|	10	-0.2	0.315	10	0.4	3.3	0.2	1.38	0.318	-0.6	1.9	0	0	0
ENSG00000160867	FGFR4	fibroblast growth factor receptor 4	extracellular region|nucleus|cytoplasm|endosome|endoplasmic reticulum|plasma membrane|integral component of plasma membrane|cell-cell junction|	organ induction|epidermal growth factor receptor signaling pathway|positive regulation of cell proliferation|positive regulation of cell proliferation|insulin receptor signaling pathway|fibroblast growth factor receptor signaling pathway|fibroblast growth factor receptor signaling pathway|fibroblast growth factor receptor signaling pathway|fibroblast growth factor receptor signaling pathway|regul…	protein tyrosine kinase activity|fibroblast growth factor-activated receptor activity|fibroblast growth factor-activated receptor activity|ATP binding|heparin binding|fibroblast growth factor binding|fibroblast growth factor binding|	10	0.3	1.75	10	0.1	0.147	0.2	1.38	0.318	-0.9	1.5	0	0	0
ENSG00000125522	NPBWR2	neuropeptides B/W receptor 2	plasma membrane|integral component of membrane|	G-protein coupled receptor signaling pathway|neuropeptide signaling pathway|opioid receptor signaling pathway|	opioid receptor activity|protein binding|neuropeptide receptor activity|	10	0.2	0.918	10	-0.4	1.64	0.2	1.38	0.318	-1.6	1	0	0	0
ENSG00000126062	TMEM115	transmembrane protein 115	nucleus|Golgi apparatus|integral component of membrane|	negative regulation of cell proliferation|	molecular_function|	10	-0.5	4.09	10	0.2	1.12	-0.5	1.37	0.319	-1.8	0.7	0	0	0
ENSG00000181903	OR4C6	olfactory receptor, family 4, subfamily C, member 6	plasma membrane|integral component of membrane|	G-protein coupled receptor signaling pathway|detection of chemical stimulus involved in sensory perception of smell|	G-protein coupled receptor activity|olfactory receptor activity|	9	0.4	2.44	10	-0.3	1.21	-0.3	1.37	0.319	-1.3	1.3	0	0	0
ENSG00000169006	NTSR2	neurotensin receptor 2	plasma membrane|integral component of plasma membrane|	cell surface receptor signaling pathway|phospholipase C-activating G-protein coupled receptor signaling pathway|neuropeptide signaling pathway|sensory perception|regulation of membrane potential|	G-protein coupled receptor activity|G-protein coupled neurotensin receptor activity|	10	-0.2	0.891	10	-0.8	0.882	-0.3	1.37	0.319	-1.8	1	0	0	0
ENSG00000177464	GPR4	G protein-coupled receptor 4	plasma membrane|integral component of plasma membrane|	G-protein coupled receptor signaling pathway|	G-protein coupled receptor activity|	10	-0.3	1.78	10	-0.1	0.0659	-0.2	1.36	0.321	-1.7	0.7	0	0	0
ENSG00000150625	GPM6A	glycoprotein M6A	plasma membrane|integral component of membrane|filopodium|neuron projection|neuronal cell body|dendritic spine|axonal growth cone|extracellular vesicular exosome|	neuron migration|neural retina development|synapse assembly|neuron projection morphogenesis|stem cell differentiation|positive regulation of filopodium assembly|calcium ion transmembrane transport|	calcium channel activity|protein binding|	10	0	0	10	-0.4	2.96	-0.2	1.36	0.321	-1.7	0.5	0	0	0
ENSG00000140323	DISP2	dispatched homolog 2 (Drosophila)	cellular_component|integral component of membrane|	smoothened signaling pathway|	molecular_function|	10	0.3	0.0593	10	-0.4	1.93	-0.5	1.36	0.321	-1.7	0.9	0	0	0
ENSG00000056736	IL17RB	interleukin 17 receptor B	extracellular region|cytoplasm|integral component of plasma membrane|cell surface|membrane|	regulation of cell growth|defense response|cytokine-mediated signaling pathway|	cytokine receptor activity|	10	-0.6	4.26	10	0.1	0.399	-0.6	1.36	0.321	-1.9	0.7	0	0	0
ENSG00000166363	OR10A5	olfactory receptor, family 10, subfamily A, member 5	plasma membrane|integral component of membrane|	G-protein coupled receptor signaling pathway|sensory perception of smell|detection of chemical stimulus involved in sensory perception of smell|detection of chemical stimulus involved in sensory perception of smell|	G-protein coupled receptor activity|olfactory receptor activity|	10	-0.5	3.74	10	0.1	0.106	-0.4	1.35	0.323	-1.7	0.5	0	0	0
ENSG00000165131	C7ORF34	chromosome 7 open reading frame 34	extracellular region|	None	None	10	-0.5	3.31	10	0.3	2.09	-0.4	1.35	0.323	-1.6	0.9	0	0	0
ENSG00000188211	NCR3LG1	natural killer cell cytotoxicity receptor 3 ligand 1	plasma membrane|integral component of membrane|viral capsid|	None	structural molecule activity|	10	0.3	2.54	10	-0.5	0.531	0.2	1.35	0.323	-1.3	1.4	0	0	0
ENSG00000161270	NPHS1	nephrosis 1, congenital, Finnish type (nephrin)	plasma membrane|plasma membrane|plasma membrane|integral component of plasma membrane|slit diaphragm|cell projection|protein complex|membrane raft|extracellular vesicular exosome|	cell adhesion|JNK cascade|skeletal muscle tissue development|myoblast fusion|excretion|positive regulation of actin filament polymerization|glomerular basement membrane development|regulation of excretion|glomerular visceral epithelial cell development|	protein binding|myosin binding|protein domain specific binding|spectrin binding|alpha-actinin binding|	10	0.2	0.47	10	0.2	0.994	0.2	1.35	0.323	-0.8	1.6	0	0	0
ENSG00000090971	NAT14	N-acetyltransferase 14 (GCN5-related, putative)	nucleus|integral component of membrane|	DNA-templated transcription, initiation|positive regulation of transcription, DNA-templated|	DNA binding|N-acetyltransferase activity|	10	0	0	10	-0.2	1.52	-0.2	1.35	0.323	-1.6	0.9	0	0	0
ENSG00000213171	LINGO4	leucine rich repeat and Ig domain containing 4	integral component of membrane|	None	None	10	-0.2	0.643	10	-1	1.91	-0.2	1.35	0.323	-2	0.3	0	0	0
ENSG00000139626	ITGB7	integrin, beta 7	plasma membrane|integrin complex|membrane|receptor complex|extracellular vesicular exosome|	cell adhesion|cell-matrix adhesion|integrin-mediated signaling pathway|multicellular organismal development|response to virus|extracellular matrix organization|regulation of immune response|leukocyte migration|	virus receptor activity|protein binding|metal ion binding|	10	0.1	0.142	10	0.4	2.16	0.3	1.34	0.324	-0.7	1.7	0	0	0
ENSG00000080854	IGSF9B	immunoglobulin superfamily, member 9B	plasma membrane|integral component of membrane|	None	None	10	0.2	1.18	10	0.2	0.273	0.2	1.34	0.324	-0.9	1.6	0	0	0
ENSG00000113389	NPR3	natriuretic peptide receptor 3	integral component of plasma membrane|extracellular vesicular exosome|	skeletal system development|osteoclast proliferation|adenylate cyclase-inhibiting G-protein coupled receptor signaling pathway|negative regulation of adenylate cyclase activity|phospholipase C-activating G-protein coupled receptor signaling pathway|regulation of blood pressure|pancreatic juice secretion|regulation of osteoblast proliferation|positive regulation of urine volume|phosphatidylinosito…	G-protein coupled peptide receptor activity|natriuretic peptide receptor activity|peptide hormone binding|hormone binding|protein homodimerization activity|	10	0.1	0.147	10	0.8	1.48	0.8	1.34	0.324	-0.4	2	0	0	0
ENSG00000177489	OR2G2	olfactory receptor, family 2, subfamily G, member 2	plasma membrane|integral component of membrane|	G-protein coupled receptor signaling pathway|detection of chemical stimulus involved in sensory perception of smell|	G-protein coupled receptor activity|olfactory receptor activity|	10	0.7	2.18	10	-0.3	1.16	-0.3	1.34	0.324	-1	1.8	0	0	0
ENSG00000183729	NPBWR1	neuropeptides B/W receptor 1	plasma membrane|integral component of membrane|	G-protein coupled receptor signaling pathway|neuropeptide signaling pathway|synaptic transmission|regulation of metabolic process|opioid receptor signaling pathway|	opioid receptor activity|protein binding|neuropeptide receptor activity|	10	0.3	2.85	10	-0.1	0.168	0.2	1.34	0.324	-1.4	1.1	0	0	0
ENSG00000120586	MRC1	mannose receptor, C type 1	plasma membrane|integral component of plasma membrane|endosome membrane|	receptor-mediated endocytosis|	receptor activity|mannose binding|	8	-0.2	0.688	8	-0.1	0.813	-0.2	1.34	0.324	-1.8	0.9	0	0	0
ENSG00000254656	RTL1	retrotransposon-like 1	integral component of membrane|	multicellular organismal development|	None	10	0.1	0.631	10	0.3	1.2	0.2	1.34	0.324	-0.8	1.6	0	0	0
ENSG00000126950	TMEM35	transmembrane protein 35	cellular_component|peroxisomal membrane|integral component of membrane|cytoplasmic membrane-bounded vesicle|	biological_process|	molecular_function|	9	-0.3	0.619	9	-0.2	0.844	-0.2	1.33	0.326	-1.5	1.2	0	0	0
ENSG00000128917	DLL4	delta-like 4 (Drosophila)	plasma membrane|integral component of membrane|	negative regulation of transcription from RNA polymerase II promoter|angiogenesis|patterning of blood vessels|blood vessel remodeling|cardiac ventricle morphogenesis|cardiac atrium morphogenesis|ventricular trabecula myocardium morphogenesis|pericardium morphogenesis|signal transduction|Notch signaling pathway|Notch receptor processing|visual perception|blood circulation|negative regulation of ce…	Notch binding|calcium ion binding|	10	0.6	1.94	10	-1.5	2.59	0.4	1.33	0.326	-2.6	1.8	0	0	0
ENSG00000124103	FAM209A	family with sequence similarity 209, member A	nucleus|integral component of membrane|extracellular vesicular exosome|	biological_process|	molecular_function|	10	-0.2	2.44	10	0	0	-0.2	1.33	0.326	-1.3	1.3	0	0	0
ENSG00000177519	RPRM	reprimo, TP53 dependent G2 arrest mediator candidate	cytoplasm|integral component of membrane|	cell cycle arrest|regulation of mitotic cell cycle|	None	10	0.4	2.32	10	0	0	0.3	1.33	0.326	-0.6	1.7	0	0	0
ENSG00000162576	MXRA8	matrix-remodelling associated 8	cell surface|integral component of membrane|extracellular vesicular exosome|	establishment of glial blood-brain barrier|	molecular_function|	10	0.2	0.744	10	0.2	0.697	0.2	1.33	0.326	-0.7	1.7	0	0	0
ENSG00000109220	CHIC2	cysteine-rich hydrophobic domain 2	cellular_component|Golgi-associated vesicle|plasma membrane|	biological_process|	molecular_function|protein binding|	10	0.6	4.1	10	0	0	0.5	1.33	0.326	-0.6	1.8	0	0	0
ENSG00000249751	ECSCR	endothelial cell surface expressed chemotaxis and apoptosis regulator	cytoplasm|plasma membrane|integral component of membrane|	angiogenesis|apoptotic process|chemotaxis|cell differentiation|	None	10	0.3	1.28	10	-0.3	0.713	0.3	1.33	0.326	-1	1.5	0	0	0
ENSG00000170848	PSG6	pregnancy specific beta-1-glycoprotein 6	extracellular region|	female pregnancy|	molecular_function|	10	-0.3	0.94	10	-0.2	0.594	-0.2	1.33	0.326	-1.6	0.9	0	0	0
ENSG00000136114	THSD1	thrombospondin, type I, domain containing 1	extracellular region|cytoplasm|cell surface|integral component of membrane|cell periphery|	hematopoietic progenitor cell differentiation|	None	10	-0.2	1.6	10	-0.1	0.0488	-0.2	1.33	0.326	-1.6	0.8	0	0	0
ENSG00000228567	VN1R4	vomeronasal 1 receptor 4	plasma membrane|integral component of membrane|	G-protein coupled receptor signaling pathway|response to pheromone|	pheromone receptor activity|	10	0.3	2.27	10	-1.1	1.31	0.2	1.33	0.326	-2	0.9	0	0	0
ENSG00000123104	ITPR2	inositol 1,4,5-trisphosphate receptor, type 2	endoplasmic reticulum membrane|plasma membrane|cell cortex|membrane|integral component of membrane|platelet dense tubular network membrane|sarcoplasmic reticulum membrane|receptor complex|	response to hypoxia|energy reserve metabolic process|transport|signal transduction|epidermal growth factor receptor signaling pathway|activation of phospholipase C activity|blood coagulation|fibroblast growth factor receptor signaling pathway|platelet activation|Fc-epsilon receptor signaling pathway|Fc-gamma receptor signaling pathway involved in phagocytosis|small molecule metabolic process|inna…	inositol 1,4,5-trisphosphate-sensitive calcium-release channel activity|calcium ion transmembrane transporter activity|phosphatidylinositol binding|	10	0.1	0.242	10	0.3	1.51	0.2	1.32	0.328	-1.2	1.2	0	0	0
ENSG00000205495	OR52J3	olfactory receptor, family 52, subfamily J, member 3	plasma membrane|integral component of membrane|	G-protein coupled receptor signaling pathway|detection of chemical stimulus involved in sensory perception of smell|	G-protein coupled receptor activity|olfactory receptor activity|	10	-0.1	0.411	10	0.3	1.73	0.2	1.32	0.328	-1.1	1.4	0	0	0
ENSG00000167543	TP53I13	tumor protein p53 inducible protein 13	cytoplasm|plasma membrane|integral component of membrane|	None	None	10	0.4	0.861	9	-0.2	1.5	-0.2	1.32	0.328	-1.2	1.5	0	0	0
ENSG00000163825	RTP3	receptor (chemosensory) transporter protein 3	cytoplasm|integral component of membrane|	detection of chemical stimulus involved in sensory perception of bitter taste|protein targeting to membrane|	protein binding|	10	-0.4	2.11	10	0.1	0.112	-0.2	1.32	0.328	-1.6	0.8	0	0	0
ENSG00000157570	TSPAN18	tetraspanin 18	integral component of membrane|	None	None	10	-0.2	2.02	10	0	0	-0.2	1.32	0.328	-1.9	0.5	0	0	0
ENSG00000187492	CDHR4	cadherin-related family member 4	plasma membrane|integral component of membrane|	homophilic cell adhesion|	calcium ion binding|	10	-0.1	0.674	10	-0.2	0.95	-0.2	1.31	0.33	-1.5	1.1	0	0	0
ENSG00000204482	LST1	leukocyte specific transcript 1	Golgi membrane|cytoplasm|Golgi apparatus|integral component of membrane|	cell morphogenesis|immune response|regulation of cell shape|anatomical structure morphogenesis|dendrite development|negative regulation of lymphocyte proliferation|	None	10	-0.1	0.446	10	-0.6	2.39	-0.3	1.31	0.33	-1.8	0.4	0	0	0
ENSG00000174136	RGMB	repulsive guidance molecule family member b	endoplasmic reticulum-Golgi intermediate compartment|membrane raft|anchored component of plasma membrane|	cell adhesion|signal transduction|axon guidance|BMP signaling pathway|positive regulation of transcription, DNA-templated|	identical protein binding|	10	0.5	1.71	10	-0.2	1.13	-0.2	1.31	0.33	-1.6	1.3	0	0	0
ENSG00000164270	HTR4	5-hydroxytryptamine (serotonin) receptor 4, G protein-coupled	cytoplasm|endosome|plasma membrane|integral component of plasma membrane|membrane|	G-protein coupled receptor signaling pathway|G-protein coupled receptor signaling pathway, coupled to cyclic nucleotide second messenger|serotonin receptor signaling pathway|serotonin receptor signaling pathway|serotonin receptor signaling pathway|synaptic transmission|positive regulation of cell proliferation|regulation of appetite|	serotonin receptor activity|	10	1.1	4.05	10	-0.1	0.16	0.2	1.31	0.33	-0.4	2	0	0	0
ENSG00000197822	OCLN	occludin	cytosol|plasma membrane|plasma membrane|cell-cell junction|tight junction|integral component of membrane|apical plasma membrane|apicolateral plasma membrane|cell junction|endocytic vesicle|cytoplasmic vesicle|	protein complex assembly|apoptotic process|cellular component disassembly involved in execution phase of apoptosis|methylation|cell-cell junction organization|S-adenosylhomocysteine metabolic process|S-adenosylmethionine metabolic process|tight junction assembly|	structural molecule activity|protein binding|thiopurine S-methyltransferase activity|protein domain specific binding|	10	-0.1	0.00795	10	-0.2	1.73	-0.2	1.31	0.33	-1.2	1.4	0	0	0
ENSG00000198369	SPRED2	sprouty-related, EVH1 domain containing 2	nucleus|cytoplasm|plasma membrane|transport vesicle membrane|	inactivation of MAPK activity|multicellular organismal development|negative regulation of peptidyl-threonine phosphorylation|positive regulation of DNA damage response, signal transduction by p53 class mediator|regulation of protein deacetylation|	stem cell factor receptor binding|protein binding|protein kinase binding|protein serine/threonine kinase inhibitor activity|	10	0.2	0.672	10	0.3	0.807	0.2	1.31	0.33	-1.2	1.4	0	0	0
ENSG00000054967	RELT	RELT tumor necrosis factor receptor	cytoplasm|plasma membrane|integral component of membrane|extracellular vesicular exosome|	None	None	10	-0.3	1.68	10	-0.1	0.141	-0.2	1.3	0.332	-1.6	0.8	0	0	0
ENSG00000204161	C10ORF128	chromosome 10 open reading frame 128	integral component of membrane|	None	None	10	-0.3	2.41	10	0	0	-0.2	1.3	0.332	-1.6	1.1	0	0	0
ENSG00000061676	NCKAP1	NCK-associated protein 1	cytosol|integral component of membrane|SCAR complex|lamellipodium membrane|extracellular vesicular exosome|	in utero embryonic development|somitogenesis|neural tube closure|apoptotic process|zygotic determination of anterior/posterior axis, embryo|central nervous system development|endoderm development|mesodermal cell migration|embryonic body morphogenesis|positive regulation of lamellipodium assembly|Rac protein signal transduction|lamellipodium assembly|establishment or maintenance of actin cytoskele…	protein binding|protein complex binding|Rac GTPase binding|	10	0	0	10	-0.3	2.16	-0.2	1.3	0.332	-1.6	0.9	0	0	0
ENSG00000110719	TCIRG1	T-cell, immune regulator 1, ATPase, H+ transporting, lysosomal V0 subunit A3	vacuolar proton-transporting V-type ATPase, V0 domain|mitochondrion|lysosomal membrane|plasma membrane|integral component of plasma membrane|endosome membrane|apical plasma membrane|phagocytic vesicle membrane|	cellular iron ion homeostasis|cellular defense response|positive regulation of cell proliferation|insulin receptor signaling pathway|ATP hydrolysis coupled proton transport|proton transport|transferrin transport|interaction with host|transmembrane transport|phagosome maturation|	transporter activity|hydrogen ion transmembrane transporter activity|	10	0.2	0.711	10	-1	3.06	0.2	1.3	0.332	-2	0.9	0	0	0
ENSG00000178531	CTXN1	cortexin 1	integral component of membrane|	None	None	10	-0.1	0.0757	10	-0.2	1.68	-0.2	1.3	0.332	-1.6	0.9	0	0	0
ENSG00000117425	PTCH2	patched 2	integral component of membrane|	signal transduction|signal transduction|epidermis development|hair cycle|negative regulation of smoothened signaling pathway|	smoothened binding|hedgehog receptor activity|hedgehog family protein binding|hedgehog family protein binding|	10	-0.6	3.3	10	0.2	2.47	0.2	1.3	0.332	-1.7	0.7	0	0	0
ENSG00000124657	OR2B6	olfactory receptor, family 2, subfamily B, member 6	plasma membrane|integral component of membrane|	G-protein coupled receptor signaling pathway|detection of chemical stimulus involved in sensory perception of smell|	G-protein coupled receptor activity|olfactory receptor activity|	10	-0.3	1.32	10	0.2	2.09	0.2	1.3	0.332	-1.1	1.2	0	0	0
ENSG00000198948	MFAP3L	microfibrillar-associated protein 3-like	plasma membrane|integral component of membrane|	None	None	10	0	0	10	-0.2	1.83	-0.2	1.3	0.332	-1.9	0.3	0	0	0
ENSG00000101017	CD40	CD40 molecule, TNF receptor superfamily member 5	extracellular space|cytoplasm|plasma membrane|plasma membrane|integral component of plasma membrane|external side of plasma membrane|CD40 receptor complex|intracellular membrane-bounded organelle|extracellular vesicular exosome|	positive regulation of protein phosphorylation|immune response-regulating cell surface receptor signaling pathway|protein complex assembly|cellular calcium ion homeostasis|inflammatory response|platelet activation|positive regulation of B cell proliferation|positive regulation of interleukin-12 production|positive regulation of Rac GTPase activity|B cell proliferation|positive regulation of tyros…	antigen binding|signal transducer activity|receptor activity|protein binding|enzyme binding|ubiquitin protein ligase binding|	10	0.1	0.115	10	0.4	2.19	0.2	1.3	0.332	-0.9	1.6	0	0	0
ENSG00000185187	SIGIRR	single immunoglobulin and toll-interleukin 1 receptor (TIR) domain	membrane|integral component of membrane|	negative regulation of cytokine-mediated signaling pathway|acute-phase response|signal transduction|negative regulation of lipopolysaccharide-mediated signaling pathway|negative regulation of sequence-specific DNA binding transcription factor activity|negative regulation of chemokine biosynthetic process|	protein binding|	10	0.1	0.667	10	-1	1.98	-0.1	1.3	0.332	-2	0.6	0	0	0
ENSG00000142224	IL19	interleukin 19	extracellular region|extracellular space|	apoptotic process|immune response|signal transduction|interleukin-6 biosynthetic process|reactive oxygen species metabolic process|negative regulation of extrinsic apoptotic signaling pathway|positive regulation of intrinsic apoptotic signaling pathway|	cytokine activity|	10	0.1	0.541	10	-0.3	2.68	-0.3	1.29	0.334	-1.5	0.9	0	0	0
ENSG00000069696	DRD4	dopamine receptor D4	plasma membrane|integral component of plasma membrane|cell cortex|vesicle membrane|membrane|neuronal cell body|terminal bouton|dendritic spine|	activation of MAPK activity|behavioral fear response|synaptic transmission, dopaminergic|response to amphetamine|cellular calcium ion homeostasis|negative regulation of adenylate cyclase activity|adenylate cyclase-inhibiting dopamine receptor signaling pathway|dopamine receptor signaling pathway|short-term memory|circadian rhythm|adult locomotory behavior|olfactory learning|photoperiodism|negativ…	dopamine neurotransmitter receptor activity, coupled via Gi/Go|dopamine neurotransmitter receptor activity, coupled via Gi/Go|dopamine neurotransmitter receptor activity|protein binding|drug binding|potassium channel regulator activity|SH3 domain binding|dopamine binding|identical protein binding|	10	0.2	0.955	10	-0.3	2.16	-0.3	1.29	0.334	-1.5	0.8	0	0	0
ENSG00000188993	LRRC66	leucine rich repeat containing 66	integral component of membrane|	None	None	10	-0.3	1.67	10	-0.1	0.0213	-0.2	1.29	0.334	-1.4	1.1	0	0	0
ENSG00000181935	OR4C16	olfactory receptor, family 4, subfamily C, member 16	plasma membrane|integral component of membrane|	G-protein coupled receptor signaling pathway|detection of chemical stimulus involved in sensory perception of smell|	G-protein coupled receptor activity|olfactory receptor activity|	10	0.2	1.42	10	-0.2	1.76	-0.2	1.29	0.334	-1.3	1.2	0	0	0
ENSG00000127022	CANX	calnexin	endoplasmic reticulum|endoplasmic reticulum lumen|endoplasmic reticulum membrane|ribosome|membrane|axon|dendrite cytoplasm|melanosome|neuronal cell body|dendritic spine|protein complex|extracellular vesicular exosome|integral component of lumenal side of endoplasmic reticulum membrane|	antigen processing and presentation of peptide antigen via MHC class I|protein folding|aging|protein secretion|protein N-linked glycosylation via asparagine|antigen processing and presentation of exogenous peptide antigen via MHC class II|post-translational protein modification|cellular protein metabolic process|synaptic vesicle endocytosis|chaperone-mediated protein folding|clathrin-mediated end…	glycoprotein binding|calcium ion binding|protein binding|apolipoprotein binding|ionotropic glutamate receptor binding|poly(A) RNA binding|unfolded protein binding|	10	0	0	10	-0.4	2.2	-0.2	1.29	0.334	-1.6	0.9	0	0	0
ENSG00000172188	OR4C11	olfactory receptor, family 4, subfamily C, member 11	plasma membrane|integral component of membrane|	G-protein coupled receptor signaling pathway|detection of chemical stimulus involved in sensory perception of smell|	G-protein coupled receptor activity|olfactory receptor activity|	10	0.2	1.02	10	-0.3	1.01	-0.2	1.29	0.334	-1.5	0.9	0	0	0
ENSG00000154162	CDH12	cadherin 12, type 2 (N-cadherin 2)	plasma membrane|integral component of membrane|	homophilic cell adhesion|cell junction assembly|adherens junction organization|cell-cell junction organization|	calcium ion binding|	10	0.2	0.594	10	0.2	0.807	0.2	1.29	0.334	-0.5	1.8	0	0	0
ENSG00000182667	NTM	neurotrimin	plasma membrane|anchored component of membrane|	cell adhesion|neuron recognition|	protein binding|	10	0.3	0.887	10	-0.8	4.47	-0.7	1.29	0.334	-1.9	1.1	0	0	0
ENSG00000182508	LHFPL1	lipoma HMGIC fusion partner-like 1	integral component of membrane|	None	None	10	-0.5	2.93	10	0.1	0.258	-0.2	1.28	0.336	-1.7	0.6	0	0	0
ENSG00000204961	PCDHA9	protocadherin alpha 9	plasma membrane|integral component of membrane|	homophilic cell adhesion|	calcium ion binding|	6	-0.4	2.04	6	0.3	1.74	-0.2	1.28	0.336	-1.8	1.2	0	0	0
ENSG00000188167	TMPPE	transmembrane protein with metallophosphoesterase domain	integral component of membrane|	metabolic process|	hydrolase activity|metal ion binding|	10	-0.2	0.408	10	-0.3	1.08	-0.2	1.28	0.336	-1.2	1.3	0	0	0
ENSG00000176136	MC5R	melanocortin 5 receptor	plasma membrane|integral component of plasma membrane|	G-protein coupled receptor signaling pathway, coupled to cyclic nucleotide second messenger|positive regulation of cAMP biosynthetic process|	melanocortin receptor activity|protein binding|hormone binding|	10	-0.4	3.86	10	0.1	0.564	-0.3	1.28	0.336	-1.6	0.7	0	0	0
ENSG00000205155	PSENEN	presenilin enhancer gamma secretase subunit	endoplasmic reticulum|endoplasmic reticulum membrane|Golgi apparatus|plasma membrane|integral component of plasma membrane|Golgi cisterna membrane|	membrane protein ectodomain proteolysis|Notch signaling pathway|Notch receptor processing|protein processing|membrane protein intracellular domain proteolysis|amyloid precursor protein catabolic process|positive regulation of apoptotic process|positive regulation of catalytic activity|neurotrophin TRK receptor signaling pathway|apoptotic signaling pathway|	protein binding|	3	-0.3	0.808	3	-0.4	0.601	-0.4	1.28	0.336	-2	1.4	0	0	0
ENSG00000205670	SMIM11	small integral membrane protein 11	cellular_component|integral component of membrane|	biological_process|	molecular_function|	10	-0.3	2.65	10	0	0	-0.2	1.28	0.336	-1.7	0.7	0	0	0
ENSG00000181323	SPEM1	spermatid maturation 1	cytoplasm|integral component of membrane|	multicellular organismal development|spermatogenesis|cell differentiation|	None	10	-0.2	0.627	10	-0.2	0.75	-0.2	1.27	0.338	-1.6	0.8	0	0	0
ENSG00000046653	GPM6B	glycoprotein M6B	plasma membrane|integral component of membrane|membrane raft|	ossification|nervous system development|protein transport|cell differentiation|positive regulation of bone mineralization|regulation of actin cytoskeleton organization|negative regulation of serotonin uptake|regulation of focal adhesion assembly|extracellular matrix assembly|negative regulation of protein localization to cell surface|	molecular_function|	10	1	0.662	10	-0.6	4.18	-0.6	1.27	0.338	-1.7	1.6	0	0	0
ENSG00000196778	OR52K1	olfactory receptor, family 52, subfamily K, member 1	plasma membrane|integral component of membrane|	G-protein coupled receptor signaling pathway|detection of chemical stimulus involved in sensory perception of smell|	G-protein coupled receptor activity|olfactory receptor activity|	10	-0.5	3.2	10	0.2	1.59	-0.4	1.27	0.338	-1.6	0.7	0	0	0
ENSG00000054392	HHAT	hedgehog acyltransferase	endoplasmic reticulum membrane|integral component of membrane|	smoothened signaling pathway|multicellular organismal development|protein palmitoylation|	GTP binding|palmitoyltransferase activity|	10	0	0	10	0.4	3.24	0.2	1.27	0.338	-1.1	1.5	0	0	0
ENSG00000158488	CD1E	CD1e molecule	Golgi membrane|early endosome|late endosome|integral component of plasma membrane|lysosomal lumen|	immune response|antigen processing and presentation|	lipid binding|	10	-0.4	1.88	10	-0.1	0.0191	-0.4	1.27	0.338	-1.7	0.6	0	0	0
ENSG00000204882	GPR20	G protein-coupled receptor 20	integral component of plasma membrane|receptor complex|	G-protein coupled receptor signaling pathway|	G-protein coupled receptor activity|	10	0.3	2.8	10	-0.2	0.0596	0.3	1.27	0.338	-0.9	1.5	0	0	0
[truncated: 2,016 more rows]

## Sheet: Ext Data Fig 3b
#GeneID	Symbol	GeneInfo	Localization	Process	Function	# elements 1	casTLE Effect 1	casTLE Score 1	# elements 2	casTLE Effect 2	casTLE Score 2	Combo casTLE Effect	Combo casTLE Score	casTLE p-value	Minimum Effect Estimate	Maximum Effect Estimate	10% FDR	5% FDR	1% FDR
[truncated: 3,124 more rows]

[truncated: 1 more sheets: Ext Data Fig 3c]
