# Supplementary material for: Inter-cellular CRISPR screens reveal regulators of cancer cell phagocytosis
Source: Springer Nature journal article supplement (doi:10.1038/s41586-021-03879-4), 2021-09-08
Supplement: MOESM8 [file 41586_2021_3879_MOESM8_ESM.xlsx]

## Sheet: Ext Data Fig 7b
#GeneID	Symbol	GeneInfo	Localization	Process	Function	# elements 1	casTLE Effect 1	casTLE Score 1	signed castle 1	# elements 2	casTLE Effect 2	casTLE Score 2	signed castle 2	Combo casTLE Effect	Combo casTLE Score	casTLE p-value	Minimum Effect Estimate	Maximum Effect Estimate	Hochberg	10% FDR	5% FDR	1% FDR
ENSMUSG00000024965	FERMT3	fermitin family member 3	podosome|membrane|cell junction|cell projection|extracellular vesicular exosome|	leukocyte cell-cell adhesion|integrin-mediated signaling pathway|integrin activation|regulation of cell-cell adhesion mediated by integrin|substrate adhesion-dependent cell spreading|platelet aggregation|	integrin binding|	10	-2.2	147	-147	10	-2.4	58.5	-58.5	-2.2	205	1e-05	-2.8	-2	0.20495	1	1	1
ENSMUSG00000079426	ARPC4	actin related protein 2/3 complex, subunit 4, 20kDa	cytosol|Arp2/3 protein complex|cell projection|extracellular vesicular exosome|	actin filament polymerization|Arp2/3 complex-mediated actin nucleation|Fc-gamma receptor signaling pathway involved in phagocytosis|actin nucleation|innate immune response|	protein binding|enzyme binding|protein binding, bridging|actin filament binding|	9	-2.1	153	-153	9	-1.8	48	-48	-2	200	1e-05	-2.5	-1.7	0.20495	1	1	1
ENSMUSG00000025485	RIC8	resistance to inhibitors of cholinesterase 8 homolog (C. elegans)	cytoplasm|cytosol|plasma membrane|membrane|	in utero embryonic development|vasculature development|adenylate cyclase-inhibiting G-protein coupled receptor signaling pathway|gastrulation|regulation of G-protein coupled receptor protein signaling pathway|visual learning|response to light stimulus|cell migration involved in gastrulation|positive regulation of GTPase activity|cell-cell adhesion involved in gastrulation|basement membrane organi…	G-protein alpha-subunit binding|guanyl-nucleotide exchange factor activity|GTPase activator activity|protein binding|	9	2.3	110	110	10	2.6	72.7	72.7	2.4	181	1e-05	1.8	3.1	0.20495	1	1	1
ENSMUSG00000020152	ACTR2	ARP2 actin-related protein 2 homolog (yeast)	cytosol|Arp2/3 protein complex|Arp2/3 protein complex|actin cytoskeleton|membrane|actin cap|cell projection|extracellular vesicular exosome|	cellular component movement|establishment or maintenance of cell polarity|asymmetric cell division|cytoplasmic transport|actin cytoskeleton organization|meiotic cytokinesis|Fc-gamma receptor signaling pathway involved in phagocytosis|innate immune response|spindle localization|	actin binding|ATP binding|	9	-2.7	122	-122	9	-1.9	54.5	-54.5	-2.7	173	1e-05	-3.3	-2.2	0.20495	1	1	1
ENSMUSG00000022488	NCKAP1L	NCK-associated protein 1-like	cytosol|integral component of plasma membrane|membrane|SCAR complex|extracellular vesicular exosome|	B cell homeostasis|myeloid cell homeostasis|protein complex assembly|chemotaxis|maintenance of cell polarity|neutrophil chemotaxis|positive regulation of actin filament polymerization|cortical actin cytoskeleton organization|positive regulation of B cell proliferation|negative regulation of interleukin-17 production|negative regulation of interleukin-6 production|positive regulation of Rac GTPase…	protein binding|protein kinase activator activity|Rac GTPase activator activity|protein complex binding|	10	-2.5	139	-139	10	-1.5	38	-38	-2.4	173	1e-05	-2.9	-1.8	0.20495	1	1	1
ENSMUSG00000029465	ARPC3	actin related protein 2/3 complex, subunit 3, 21kDa	cytosol|Arp2/3 protein complex|actin cytoskeleton|membrane|lamellipodium|extracellular vesicular exosome|	cellular component movement|Arp2/3 complex-mediated actin nucleation|Fc-gamma receptor signaling pathway involved in phagocytosis|innate immune response|	actin binding|structural constituent of cytoskeleton|protein binding|	10	-2.3	108	-108	10	-1.7	41.9	-41.9	-2	148	1e-05	-2.6	-1.7	0.20495	1	1	1
ENSMUSG00000020611	GNA13	guanine nucleotide binding protein (G protein), alpha 13	nucleus|heterotrimeric G-protein complex|plasma membrane|membrane|brush border membrane|melanosome|extracellular vesicular exosome|	patterning of blood vessels|in utero embryonic development|GTP catabolic process|cellular component movement|signal transduction|adenylate cyclase-activating G-protein coupled receptor signaling pathway|positive regulation of cytosolic calcium ion concentration|Rho protein signal transduction|blood coagulation|regulation of cell shape|cell differentiation|platelet activation|regulation of cell mi…	GTPase activity|signal transducer activity|protein binding|GTP binding|G-protein beta/gamma-subunit complex binding|type 1 angiotensin receptor binding|D5 dopamine receptor binding|metal ion binding|	10	1.6	88.7	88.7	10	1.6	54.6	54.6	1.6	143	1e-05	1.4	2	0.20495	1	1	1
ENSMUSG00000051154	COMMD3	COMM domain containing 3	None	None	protein binding|	10	-1.6	81.3	-81.3	10	-2.2	54.1	-54.1	-1.9	133	1e-05	-2.5	-1.5	0.20495	1	1	1
ENSMUSG00000038965	UBE2L3	ubiquitin-conjugating enzyme E2L 3	ubiquitin ligase complex|nucleus|cytoplasm|extracellular vesicular exosome|	protein polyubiquitination|transcription, DNA-templated|regulation of transcription, DNA-templated|regulation of transcription, DNA-templated|cellular protein modification process|ubiquitin-dependent protein catabolic process|cell proliferation|protein ubiquitination|protein K11-linked ubiquitination|cellular response to steroid hormone stimulus|cellular response to glucocorticoid stimulus|	transcription coactivator activity|ubiquitin-protein transferase activity|ubiquitin-protein transferase activity|ubiquitin-protein transferase activity|protein binding|ATP binding|acid-amino acid ligase activity|enzyme binding|ubiquitin protein ligase binding|poly(A) RNA binding|	8	-2.5	108	-108	8	-2	18.5	-18.5	-2.4	124	1e-05	-3.2	-1.9	0.20495	1	1	1
ENSMUSG00000029213	COMMD8	COMM domain containing 8	None	None	protein binding|	9	-2	90.5	-90.5	9	-2.5	34.1	-34.1	-2.1	123	1e-05	-3	-1.8	0.20495	1	1	1
ENSMUSG00000058715	FCER1G	Fc fragment of IgE, high affinity I, receptor for; gamma polypeptide	plasma membrane|integral component of plasma membrane|external side of plasma membrane|cell surface|Fc-epsilon receptor I complex|	positive regulation of type IIa hypersensitivity|positive regulation of type III hypersensitivity|positive regulation of type I hypersensitivity|neutrophil activation involved in immune response|Fc receptor mediated stimulatory signaling pathway|serotonin secretion by platelet|phagocytosis, engulfment|integrin-mediated signaling pathway|blood coagulation|regulation of platelet activation|immunogl…	protein binding|IgE receptor activity|IgE binding|IgG binding|	10	-2.4	86.4	-86.4	10	-1.7	38.3	-38.3	-2.2	121	1e-05	-2.8	-1.7	0.20495	1	1	1
ENSMUSG00000030786	ITGAM	integrin, alpha M (complement component 3 receptor 3 subunit)	nucleus|plasma membrane|integrin complex|external side of plasma membrane|cell surface|extracellular vesicular exosome|	toll-like receptor signaling pathway|cell adhesion|leukocyte cell-cell adhesion|integrin-mediated signaling pathway|blood coagulation|microglia development|extracellular matrix organization|neutrophil chemotaxis|toll-like receptor 4 signaling pathway|innate immune response|cellular extravasation|activated T cell proliferation|leukocyte migration|	opsonin binding|glycoprotein binding|protein binding|heparin binding|heparan sulfate proteoglycan binding|metal ion binding|protein heterodimerization activity|	10	-1.4	78.3	-78.3	10	-1.2	35.1	-35.1	-1.4	113	1e-05	-1.8	-1.2	0.20495	1	1	1
ENSMUSG00000034216	VPS18	vacuolar protein sorting 18 homolog (S. cerevisiae)	lysosomal membrane|early endosome|actin filament|HOPS complex|late endosome membrane|	intracellular protein transport|endosome organization|lysosome organization|vesicle-mediated transport|	actin binding|protein binding|metal ion binding|	10	-2.3	84.7	-84.7	10	-2.4	26.2	-26.2	-2.4	111	1e-05	-3	-1.9	0.20495	1	1	1
ENSMUSG00000026341	ACTR3	ARP3 actin-related protein 3 homolog (yeast)	Golgi membrane|podosome|cytosol|Arp2/3 protein complex|actin cytoskeleton|membrane|lamellipodium|hemidesmosome|excitatory synapse|extracellular vesicular exosome|	cellular component movement|establishment or maintenance of cell polarity|asymmetric cell division|response to carbohydrate|positive regulation of lamellipodium assembly|positive regulation of actin filament polymerization|meiotic cytokinesis|Fc-gamma receptor signaling pathway involved in phagocytosis|regulation of myosin II filament organization|innate immune response|positive regulation of neu…	actin binding|protein binding|ATP binding|	10	-1.7	76.1	-76.1	10	-1.9	34.9	-34.9	-1.7	110	1e-05	-2.3	-1.3	0.20495	1	1	1
ENSMUSG00000007815	RHOA	ras homolog family member A	cytosol|cytoskeleton|plasma membrane|cell cortex|lamellipodium|cell junction|midbody|cleavage furrow|apical junction complex|extracellular vesicular exosome|	GTP catabolic process|transforming growth factor beta receptor signaling pathway|small GTPase mediated signal transduction|Rho protein signal transduction|axon guidance|blood coagulation|viral process|substantia nigra development|actin cytoskeleton organization|platelet activation|regulation of cell migration|positive regulation of cytokinesis|regulation of osteoblast proliferation|cleavage furro…	GTPase activity|protein binding|GTP binding|myosin binding|	10	1.3	66	66	10	1	34.2	34.2	1.3	99.1	1e-05	1.1	1.7	0.20495	1	1	1
ENSMUSG00000027195	HSD17B12	hydroxysteroid (17-beta) dehydrogenase 12	endoplasmic reticulum membrane|integral component of membrane|extracellular matrix|	fatty acid biosynthetic process|estrogen biosynthetic process|positive regulation of cell-substrate adhesion|triglyceride biosynthetic process|extracellular matrix organization|long-chain fatty-acyl-CoA biosynthetic process|cellular lipid metabolic process|small molecule metabolic process|oxidation-reduction process|	fibronectin binding|estradiol 17-beta-dehydrogenase activity|protein binding|collagen binding|heparin binding|	10	-1.9	71.2	-71.2	10	-2.5	26.4	-26.4	-1.9	97.2	1e-05	-2.6	-1.3	0.20495	1	1	1
ENSMUSG00000055041	COMMD5	COMM domain containing 5	nucleus|	None	protein binding|	10	-1.7	64.3	-64.3	10	-1.6	28.8	-28.8	-1.6	92.7	1e-05	-2.1	-1.2	0.20495	1	1	1
ENSMUSG00000001016	ILF2	interleukin enhancer binding factor 2	nucleus|nucleolus|cytoplasm|membrane|ribonucleoprotein complex|	transcription, DNA-templated|immune response|positive regulation of transcription, DNA-templated|	DNA binding|double-stranded RNA binding|protein binding|ATP binding|transferase activity|poly(A) RNA binding|	10	-1.7	61	-61	10	-1.6	27.5	-27.5	-1.6	88.1	1e-05	-2.3	-1.2	0.20495	1	1	1
ENSMUSG00000028540	DPH2	DPH2 homolog (S. cerevisiae)	cytoplasm|	peptidyl-diphthamide biosynthetic process from peptidyl-histidine|	None	10	-1.8	70.8	-70.8	10	-2.3	16.4	-16.4	-1.8	86.4	1e-05	-2.6	-1.3	0.20495	1	1	1
ENSMUSG00000038503	MESDC2	mesoderm development candidate 2	cellular_component|endoplasmic reticulum|plasma membrane|	protein folding|mesoderm development|Wnt signaling pathway|protein localization to cell surface|	molecular_function|low-density lipoprotein particle receptor binding|	10	-1.7	61.7	-61.7	10	-2.5	24	-24	-1.7	84.7	1e-05	-2.7	-1.4	0.20495	1	1	1
ENSMUSG00000032127	VPS11	vacuolar protein sorting 11 homolog (S. cerevisiae)	lysosomal membrane|endosome|endocytic vesicle|HOPS complex|late endosome membrane|	intracellular protein transport|vesicle-mediated transport|	nucleotide binding|protein binding|zinc ion binding|	10	-1.9	66.1	-66.1	10	-1.6	18.8	-18.8	-1.9	83.9	1e-05	-2.5	-1.4	0.20495	1	1	1
ENSMUSG00000033940	BRK1	BRICK1, SCAR/WAVE actin-nucleating complex subunit	cytosol|cytoskeleton|lamellipodium|SCAR complex|extracellular vesicular exosome|	in utero embryonic development|positive regulation of cell proliferation|positive regulation of lamellipodium assembly|Rac protein signal transduction|actin cytoskeleton organization|Fc-gamma receptor signaling pathway involved in phagocytosis|innate immune response|cell motility|protein homotrimerization|positive regulation of Arp2/3 complex-mediated actin nucleation|	protein complex binding|Rac GTPase binding|	10	-1.7	63.4	-63.4	10	-1.6	20.4	-20.4	-1.7	83.3	1e-05	-2.2	-1.2	0.20495	1	1	1
ENSMUSG00000036835	PSENEN	presenilin enhancer gamma secretase subunit	endoplasmic reticulum|endoplasmic reticulum membrane|Golgi apparatus|plasma membrane|integral component of plasma membrane|Golgi cisterna membrane|	membrane protein ectodomain proteolysis|Notch signaling pathway|Notch receptor processing|protein processing|membrane protein intracellular domain proteolysis|amyloid precursor protein catabolic process|positive regulation of apoptotic process|positive regulation of catalytic activity|neurotrophin TRK receptor signaling pathway|apoptotic signaling pathway|	protein binding|	10	-1.3	49.3	-49.3	10	-1.6	32.7	-32.7	-1.3	81	1e-05	-1.8	-1	0.20495	1	1	1
ENSMUSG00000051695	PCBP1	poly(rC) binding protein 1	nucleoplasm|cytoplasm|membrane|ribonucleoprotein complex|extracellular vesicular exosome|	mRNA splicing, via spliceosome|RNA splicing|gene expression|	single-stranded DNA binding|RNA binding|protein binding|poly(A) RNA binding|	10	-1.4	58	-58	10	-1.2	23.2	-23.2	-1.4	80.6	1e-05	-1.7	-1	0.20495	1	1	1
ENSMUSG00000030842	LAMTOR1	late endosomal/lysosomal adaptor, MAPK and MTOR activator 1	lysosome|lysosomal membrane|Golgi apparatus|plasma membrane|late endosome membrane|intracellular membrane-bounded organelle|membrane raft|extracellular vesicular exosome|Ragulator complex|	regulation of receptor recycling|endosome organization|lysosome organization|regulation of cholesterol esterification|regulation of cholesterol efflux|cell growth|positive regulation of TOR signaling|lysosome localization|endosome localization|cellular protein localization|cholesterol homeostasis|positive regulation of MAPK cascade|positive regulation of GTPase activity|regulation of cholesterol …	guanyl-nucleotide exchange factor activity|protein binding|protein complex scaffold|	10	-2	65.3	-65.3	10	-1.2	18	-18	-1.8	79.8	1e-05	-2.4	-1.4	0.20495	1	1	1
ENSMUSG00000030199	ETV6	ets variant 6	nucleolus|cytoplasm|	negative regulation of transcription from RNA polymerase II promoter|negative regulation of transcription from RNA polymerase II promoter|regulation of transcription from RNA polymerase II promoter|transcription from RNA polymerase II promoter|cell differentiation|	RNA polymerase II regulatory region sequence-specific DNA binding|sequence-specific DNA binding RNA polymerase II transcription factor activity|RNA polymerase II transcription regulatory region sequence-specific DNA binding transcription factor activity involved in negative regulation of transcription|sequence-specific DNA binding transcription factor activity|protein binding|protein domain speci…	10	-1.5	59.7	-59.7	10	-1.7	20.1	-20.1	-1.6	79.3	1e-05	-2.1	-1.3	0.20495	1	1	1
ENSMUSG00000000290	ITGB2	integrin, beta 2 (complement component 3 receptor 3 and 4 subunit)	plasma membrane|integrin complex|cell surface|membrane|receptor complex|extracellular vesicular exosome|	toll-like receptor signaling pathway|apoptotic process|inflammatory response|cell adhesion|leukocyte cell-cell adhesion|cell-matrix adhesion|integrin-mediated signaling pathway|cell-cell signaling|multicellular organismal development|blood coagulation|regulation of cell shape|extracellular matrix organization|neutrophil chemotaxis|toll-like receptor 4 signaling pathway|innate immune response|regu…	glycoprotein binding|receptor activity|protein binding|protein kinase binding|metal ion binding|	10	-1.4	56.8	-56.8	10	-1.2	23.2	-23.2	-1.4	79.2	1e-05	-1.8	-1.1	0.20495	1	1	1
ENSMUSG00000022961	SON	SON DNA binding protein	nucleus|nuclear speck|	microtubule cytoskeleton organization|cytokinesis|mRNA processing|RNA splicing|negative regulation of apoptotic process|regulation of RNA splicing|regulation of cell cycle|	nucleic acid binding|DNA binding|RNA binding|protein binding|poly(A) RNA binding|RS domain binding|	10	-1.6	53	-53	10	-1.7	25.7	-25.7	-1.6	78.1	1e-05	-2.1	-1.3	0.20495	1	1	1
ENSMUSG00000018565	ELP5	elongator acetyltransferase complex subunit 5	nucleus|cytoplasm|Elongator holoenzyme complex|	chromatin organization|transcription, DNA-templated|regulation of transcription, DNA-templated|positive regulation of cell migration|	protein binding|	10	1.3	45.1	45.1	8	1.3	32.7	32.7	1.3	77.4	1e-05	1	1.8	0.20495	1	1	1
ENSMUSG00000025234	ARIH1	ariadne RBR E3 ubiquitin protein ligase 1	ubiquitin ligase complex|cytoplasm|cytosol|	ubiquitin-dependent protein catabolic process|protein ubiquitination|protein ubiquitination|cytokine-mediated signaling pathway|	ubiquitin-protein transferase activity|protein binding|zinc ion binding|small conjugating protein ligase activity|ubiquitin protein ligase binding|	10	-1.2	56.3	-56.3	10	-1.2	19.1	-19.1	-1.2	75	1e-05	-1.6	-1	0.20495	1	1	1
ENSMUSG00000032560	DNAJC13	DnaJ (Hsp40) homolog, subfamily C, member 13	lysosomal membrane|membrane|extracellular vesicular exosome|	osteoblast differentiation|	None	10	-1.7	58.6	-58.6	10	-1.2	16.6	-16.6	-1.3	74.2	1e-05	-2	-1	0.20495	1	1	1
ENSMUSG00000032299	COMMD4	COMM domain containing 4	cytoplasm|	None	protein binding|	10	-1.2	40.8	-40.8	10	-1.7	34.6	-34.6	-1.3	72.9	1e-05	-1.9	-1	0.20495	1	1	1
ENSMUSG00000052593	ADAM17	ADAM metallopeptidase domain 17	cytoplasm|plasma membrane|integral component of plasma membrane|cell-cell junction|focal adhesion|cell surface|actin cytoskeleton|membrane|apical plasma membrane|ruffle membrane|membrane raft|	response to hypoxia|positive regulation of protein phosphorylation|neutrophil mediated immunity|germinal center formation|positive regulation of leukocyte chemotaxis|proteolysis|membrane protein ectodomain proteolysis|membrane protein ectodomain proteolysis|apoptotic process|cell adhesion|epidermal growth factor receptor signaling pathway|epidermal growth factor receptor signaling pathway|Notch s…	metalloendopeptidase activity|metalloendopeptidase activity|metalloendopeptidase activity|Notch binding|interleukin-6 receptor binding|integrin binding|protein binding|metallopeptidase activity|metallopeptidase activity|metallopeptidase activity|zinc ion binding|SH3 domain binding|PDZ domain binding|	10	-1.1	50.1	-50.1	10	-1.4	21.3	-21.3	-1.2	70.2	1e-05	-1.7	-0.9	0.20495	1	1	1
ENSMUSG00000006304	ARPC2	actin related protein 2/3 complex, subunit 2, 34kDa	cytoplasm|endosome|Golgi apparatus|cytosol|Arp2/3 protein complex|plasma membrane|focal adhesion|actin cytoskeleton|cell leading edge|neuron projection|synapse|extracellular vesicular exosome|	cellular component movement|positive regulation of lamellipodium assembly|positive regulation of actin filament polymerization|Fc-gamma receptor signaling pathway involved in phagocytosis|innate immune response|positive regulation of substrate adhesion-dependent cell spreading|	actin binding|structural constituent of cytoskeleton|protein binding|kinesin binding|AP-1 adaptor complex binding|Arp2/3 complex binding|	10	-1.1	40.3	-40.3	10	-1.8	32.7	-32.7	-1.4	69.5	1e-05	-2.1	-1	0.20495	1	1	1
ENSMUSG00000004677	MYO9B	myosin IXB	ruffle|cytoplasm|cytosol|cell cortex|actin cytoskeleton|membrane|myosin complex|lamellipodium|filamentous actin|filopodium tip|perinuclear region of cytoplasm|	monocyte chemotaxis|ATP catabolic process|small GTPase mediated signal transduction|Rho protein signal transduction|establishment of cell polarity|actin filament-based movement|positive regulation of Rho GTPase activity|macrophage chemotaxis|regulation of small GTPase mediated signal transduction|lamellipodium morphogenesis|	microfilament motor activity|actin binding|Rho GTPase activator activity|protein binding|calmodulin binding|ATP binding|zinc ion binding|ATPase activity|actin-dependent ATPase activity|ATP-dependent protein binding|ADP binding|actin filament binding|	10	-2	58	-58	10	-1.9	12	-12	-2	69.5	1e-05	-2.7	-1.5	0.20495	1	1	1
ENSMUSG00000034560	A230046K03RIK	RIKEN cDNA A230046K03 gene	intracellular|cell|endosome|endosome|WASH complex|	endosomal transport|endosomal transport|	molecular_function|	10	-1.3	49.2	-49.2	10	-1.1	19.5	-19.5	-1.3	68.1	1e-05	-1.7	-1	0.20495	1	1	1
ENSMUSG00000027361	GABPB1	GA binding protein transcription factor, beta subunit 1	nucleus|	transcription, DNA-templated|regulation of transcription from RNA polymerase II promoter|positive regulation of transcription from RNA polymerase II promoter|	sequence-specific DNA binding transcription factor activity|protein binding|transcription regulatory region DNA binding|protein heterodimerization activity|	9	1.6	27.9	27.9	10	1.6	38.5	38.5	1.6	65.9	1e-05	1.2	2.1	0.20495	1	1	1
ENSMUSG00000033446	LPAR6	lysophosphatidic acid receptor 6	plasma membrane|plasma membrane|integral component of membrane|	G-protein coupled receptor signaling pathway|	G-protein coupled receptor activity|	10	1	39.6	39.6	10	1	26.4	26.4	1	65.6	1e-05	0.8	1.4	0.20495	1	1	1
ENSMUSG00000031143	CCDC22	coiled-coil domain containing 22	cellular_component|	biological_process|	molecular_function|	10	-1.6	49	-49	10	-1.4	17	-17	-1.5	65.1	1e-05	-2	-1.2	0.20495	1	1	1
ENSMUSG00000003458	NCSTN	nicastrin	lysosomal membrane|endoplasmic reticulum|endoplasmic reticulum|Golgi apparatus|Golgi apparatus|plasma membrane|integral component of plasma membrane|integral component of plasma membrane|membrane|integral component of membrane|melanosome|extracellular vesicular exosome|	myeloid cell homeostasis|proteolysis|membrane protein ectodomain proteolysis|membrane protein ectodomain proteolysis|Notch signaling pathway|Notch receptor processing|protein processing|protein processing|extracellular matrix disassembly|extracellular matrix organization|membrane protein intracellular domain proteolysis|T cell proliferation|amyloid precursor protein catabolic process|positive reg…	endopeptidase activity|protein binding|	10	-1	47.4	-47.4	10	-1	17.3	-17.3	-1	64.3	1e-05	-1.4	-0.8	0.20495	1	1	1
ENSMUSG00000036513	COMMD2	COMM domain containing 2	None	None	protein binding|	10	-1.2	49.1	-49.1	10	-0.9	15.5	-15.5	-1.1	63.1	1e-05	-1.6	-0.9	0.20495	1	1	1
ENSMUSG00000040552	C3AR1	complement component 3a receptor 1	plasma membrane|integral component of plasma membrane|	complement receptor mediated signaling pathway|chemotaxis|inflammatory response|G-protein coupled receptor signaling pathway|positive regulation of cytosolic calcium ion concentration|blood circulation|metabolic process|positive regulation vascular endothelial growth factor production|positive regulation of macrophage chemotaxis|positive regulation of angiogenesis|positive regulation of neutrophi…	phosphatidylinositol phospholipase C activity|complement component C3a receptor activity|G-protein coupled receptor activity|C3a anaphylatoxin receptor activity|	10	-1.5	50	-50	10	-1.1	13.7	-13.7	-1.4	62.5	1e-05	-1.8	-1	0.20495	1	1	1
ENSMUSG00000042275	PELO	pelota homolog (Drosophila)	nucleus|cytoplasm|	cell cycle|cell proliferation|chromosome organization|cell division|nuclear-transcribed mRNA catabolic process, non-stop decay|nuclear-transcribed mRNA catabolic process, no-go decay|RNA surveillance|nucleic acid phosphodiester bond hydrolysis|	endonuclease activity|metal ion binding|	10	1.6	50.5	50.5	10	1.7	11.8	11.8	1.6	61.9	1e-05	1.2	2.2	0.20495	1	1	1
ENSMUSG00000002496	TSC2	tuberous sclerosis 2	nucleus|cytoplasm|cytoplasm|Golgi apparatus|cytosol|cytosol|caveola|membrane|dendrite|growth cone|TSC1-TSC2 complex|neuronal cell body|perinuclear region of cytoplasm|	response to hypoxia|neural tube closure|negative regulation of protein kinase activity|protein import into nucleus|endocytosis|acute-phase response|cell cycle arrest|epidermal growth factor receptor signaling pathway|heart development|protein localization|negative regulation of cell proliferation|insulin receptor signaling pathway|fibroblast growth factor receptor signaling pathway|phosphatidylin…	GTPase activator activity|protein binding|phosphatase binding|protein homodimerization activity|protein heterodimerization activity|14-3-3 protein binding|	9	-2.2	40.5	-40.5	9	-1.5	21.6	-21.6	-2	60.1	1e-05	-2.8	-1.5	0.20495	1	1	1
ENSMUSG00000035569	ANKRD11	ankyrin repeat domain 11	nucleus|cytoplasm|plasma membrane|	in utero embryonic development|tissue homeostasis|multicellular organism growth|odontogenesis of dentin-containing tooth|skeletal system morphogenesis|face morphogenesis|bone development|	None	10	1.1	38.5	38.5	10	1.1	21.7	21.7	1.1	59.8	1e-05	0.9	1.5	0.20495	1	1	1
ENSMUSG00000053436	MAPK14	mitogen-activated protein kinase 14	spindle pole|nucleus|nucleoplasm|cytoplasm|mitochondrion|cytosol|extracellular vesicular exosome|	DNA damage checkpoint|activation of MAPK activity|cell morphogenesis|cartilage condensation|angiogenesis|chondrocyte differentiation|toll-like receptor signaling pathway|MyD88-dependent toll-like receptor signaling pathway|MyD88-independent toll-like receptor signaling pathway|glucose metabolic process|transcription, DNA-templated|regulation of transcription from RNA polymerase II promoter|apopto…	protein serine/threonine kinase activity|MAP kinase activity|MAP kinase kinase activity|protein binding|ATP binding|NFAT protein binding|	10	-1	43.9	-43.9	10	-0.8	15.5	-15.5	-1	58.9	1e-05	-1.3	-0.7	0.20495	1	1	1
ENSMUSG00000026005	RPE	ribulose-5-phosphate-3-epimerase	cytosol|	carbohydrate metabolic process|carbohydrate metabolic process|pentose-phosphate shunt|pentose-phosphate shunt|small molecule metabolic process|	ribulose-phosphate 3-epimerase activity|ribulose-phosphate 3-epimerase activity|identical protein binding|protein homodimerization activity|metal ion binding|	9	1.1	35.9	35.9	9	1	23.3	23.3	1	58.7	1e-05	0.8	1.4	0.20495	1	1	1
ENSMUSG00000024335	BRD2	bromodomain containing 2	nucleus|cytoplasm|	nucleosome assembly|transcription, DNA-templated|regulation of transcription from RNA polymerase II promoter|spermatogenesis|chromatin modification|	chromatin binding|protein binding|lysine-acetylated histone binding|	7	1.3	34	34	9	1.4	23.9	23.9	1.3	57.5	1e-05	1	1.9	0.20495	1	1	1
ENSMUSG00000027835	PDCD10	programmed cell death 10	Golgi membrane|cytosol|plasma membrane|extracellular vesicular exosome|	angiogenesis|apoptotic process|positive regulation of cell proliferation|negative regulation of apoptotic process|positive regulation of MAP kinase activity|	protein binding|protein homodimerization activity|protein N-terminus binding|	10	1.6	37	37	10	1	21.3	21.3	1	56.8	1e-05	0.8	1.8	0.20495	1	1	1
ENSMUSG00000042111	CCDC115	coiled-coil domain containing 115	lysosome|endosome|membrane|	None	None	10	-0.9	30.7	-30.7	10	-1.5	29.7	-29.7	-1.3	55.7	1e-05	-1.8	-0.9	0.20495	1	1	1
ENSMUSG00000051396	HSPA14	heat shock 70kDa protein 14	cytosol|ribosome|membrane|	'de novo' cotranslational protein folding|	protein binding|ATP binding|	10	1.5	31.4	31.4	10	1.4	24.7	24.7	1.5	55.5	1e-05	1.1	2	0.20495	1	1	1
ENSMUSG00000062232	RAPGEF2	Rap guanine nucleotide exchange factor (GEF) 2	cytoplasm|late endosome|plasma membrane|integral component of plasma membrane|cell-cell junction|membrane|neuron projection|neuronal cell body|protein complex|synapse|perinuclear region of cytoplasm|	MAPK cascade|blood vessel development|neuron migration|G-protein coupled receptor signaling pathway|neuropeptide signaling pathway|small GTPase mediated signal transduction|negative regulation of cell proliferation|positive regulation of neuron projection development|cAMP-mediated signaling|cAMP-mediated signaling|ventricular system development|forebrain neuron development|neuron projection devel…	signal transducer activity|Ras guanyl-nucleotide exchange factor activity|calcium ion binding|protein binding|Rap guanyl-nucleotide exchange factor activity|Rap guanyl-nucleotide exchange factor activity|protein kinase binding|diacylglycerol binding|PDZ domain binding|cAMP binding|beta-1 adrenergic receptor binding|Rap GTPase activator activity|WW domain binding|	10	-1.6	39.6	-39.6	10	-1.4	16.4	-16.4	-1.4	55.5	1e-05	-2.1	-1	0.20495	1	1	1
ENSMUSG00000028465	TLN1	talin 1	ruffle|extracellular region|cytoplasm|microtubule organizing center|cytosol|plasma membrane|cell-cell junction|focal adhesion|focal adhesion|focal adhesion|cell surface|actin cytoskeleton|ruffle membrane|extracellular vesicular exosome|	platelet degranulation|cellular component movement|muscle contraction|activation of signaling protein activity involved in unfolded protein response|cytoskeletal anchoring at plasma membrane|cell-cell junction assembly|cell-substrate junction assembly|cell adhesion|axon guidance|blood coagulation|platelet activation|cortical actin cytoskeleton organization|endoplasmic reticulum unfolded protein r…	actin binding|insulin receptor binding|integrin binding|structural constituent of cytoskeleton|protein binding|vinculin binding|LIM domain binding|	10	-1.5	37.9	-37.9	10	-1.9	18.4	-18.4	-1.6	55.3	1e-05	-2.3	-1.3	0.20495	1	1	1
ENSMUSG00000015750	APH1A	APH1A gamma secretase subunit	endoplasmic reticulum|endoplasmic reticulum membrane|Golgi apparatus|plasma membrane|integral component of plasma membrane|membrane|Golgi cisterna membrane|	metanephros development|membrane protein ectodomain proteolysis|Notch signaling pathway|Notch receptor processing|Notch receptor processing|protein processing|membrane protein intracellular domain proteolysis|membrane protein intracellular domain proteolysis|amyloid precursor protein catabolic process|amyloid precursor protein catabolic process|positive regulation of apoptotic process|positive re…	endopeptidase activity|protein binding|	10	-1	39.6	-39.6	10	-1.1	14.7	-14.7	-1	53.8	1e-05	-1.4	-0.7	0.20495	1	1	1
ENSMUSG00000031156	SLC35A2	solute carrier family 35 (UDP-galactose transporter), member A2	Golgi membrane|nucleus|Golgi apparatus|integral component of membrane|	galactose metabolic process|UDP-galactose transport|proton transport|transmembrane transport|UDP-galactose transmembrane transport|	sugar:proton symporter activity|UDP-galactose transmembrane transporter activity|protein binding|	10	-1.5	38	-38	10	-1.3	15.2	-15.2	-1.5	52.3	1e-05	-1.9	-1	0.20495	1	1	1
ENSMUSG00000055805	FMNL1	formin-like 1	cytosol|plasma membrane|cell cortex|membrane|bleb|phagocytic vesicle|extracellular vesicular exosome|	substrate-dependent cell migration|regulation of cell shape|cortical actin cytoskeleton organization|actin filament severing|	molecular_function|protein binding|profilin binding|GTPase activating protein binding|Rac GTPase binding|actin filament binding|	10	-1.1	39.7	-39.7	10	-0.9	12.8	-12.8	-1	51.9	1e-05	-1.5	-0.8	0.20495	1	1	1
ENSMUSG00000025153	FASN	fatty acid synthase	cytoplasm|mitochondrion|Golgi apparatus|cytosol|plasma membrane|membrane|melanosome|glycogen granule|extracellular vesicular exosome|	osteoblast differentiation|acetyl-CoA metabolic process|energy reserve metabolic process|fatty acid metabolic process|fatty acid biosynthetic process|vitamin metabolic process|water-soluble vitamin metabolic process|pantothenate metabolic process|triglyceride biosynthetic process|positive regulation of cellular metabolic process|long-chain fatty-acyl-CoA biosynthetic process|cellular lipid metabo…	fatty acid synthase activity|[acyl-carrier-protein] S-acetyltransferase activity|[acyl-carrier-protein] S-malonyltransferase activity|3-oxoacyl-[acyl-carrier-protein] synthase activity|3-oxoacyl-[acyl-carrier-protein] reductase (NADPH) activity|3-hydroxypalmitoyl-[acyl-carrier-protein] dehydratase activity|enoyl-[acyl-carrier-protein] reductase (NADPH, B-specific) activity|oleoyl-[acyl-carrier-pr…	10	1.8	42.2	42.2	10	1.1	11.9	11.9	1.1	51.9	1e-05	0.8	2.1	0.20495	1	1	1
ENSMUSG00000016554	EIF3D	eukaryotic translation initiation factor 3, subunit D	cytosol|eukaryotic translation initiation factor 3 complex|membrane|eukaryotic 43S preinitiation complex|eukaryotic 48S preinitiation complex|	formation of translation preinitiation complex|formation of translation initiation complex|translation|translational initiation|translational initiation|translational initiation|regulation of translational initiation|gene expression|cellular protein metabolic process|	translation initiation factor activity|translation initiation factor activity|protein binding|poly(A) RNA binding|	10	1.5	28.7	28.7	10	1.4	23.5	23.5	1.5	51.7	1e-05	1.1	1.9	0.20495	1	1	1
ENSMUSG00000040044	ORC3	origin recognition complex, subunit 3	origin recognition complex|nucleoplasm|nuclear origin of replication recognition complex|	G1/S transition of mitotic cell cycle|mitotic cell cycle|DNA replication|neural precursor cell proliferation|	DNA replication origin binding|protein binding|	7	1.8	45.4	45.4	7	1.2	7.91	7.91	1.8	51.4	1e-05	1.1	2.6	0.20495	1	1	1
ENSMUSG00000094021	GM3685	predicted gene 3685	cellular_component|	biological_process|	molecular_function|	10	1.3	30.5	30.5	10	1.1	21.2	21.2	1.2	51.3	1e-05	0.8	1.7	0.20495	1	1	1
ENSMUSG00000050463	KRT78	keratin 78	extracellular space|keratin filament|extracellular vesicular exosome|	None	structural molecule activity|	9	2	23.1	23.1	9	1.9	28.5	28.5	2	51.2	1e-05	1.5	3.6	0.20495	1	1	1
ENSMUSG00000022350	E430025E21RIK	RIKEN cDNA E430025E21 gene	cytoplasm|endosome|endosome|endoplasmic reticulum|WASH complex|	endosomal transport|	molecular_function|	10	-1.2	30.9	-30.9	10	-1.7	21.4	-21.4	-1.3	50.8	1e-05	-1.9	-0.9	0.20495	1	1	1
ENSMUSG00000073982	RHOG	ras homolog family member G	cytosol|plasma membrane|extracellular vesicular exosome|	GTP catabolic process|GTP catabolic process|small GTPase mediated signal transduction|Rho protein signal transduction|axon guidance|blood coagulation|positive regulation of cell proliferation|Rac protein signal transduction|actin cytoskeleton organization|platelet activation|activation of Rac GTPase activity|positive regulation of transcription, DNA-templated|regulation of small GTPase mediated s…	GTPase activity|protein binding|GTP binding|	10	-1.2	38.3	-38.3	10	-1	13.4	-13.4	-1.2	50.7	1e-05	-1.6	-0.9	0.20495	1	1	1
ENSMUSG00000028671	GALE	UDP-galactose-4-epimerase	cytosol|extracellular vesicular exosome|	carbohydrate metabolic process|galactose catabolic process|galactose catabolic process|cellular metabolic process|small molecule metabolic process|	UDP-glucose 4-epimerase activity|UDP-glucose 4-epimerase activity|protein homodimerization activity|coenzyme binding|	10	-1	30.7	-30.7	10	-1.5	21.2	-21.2	-1.2	50.5	1e-05	-1.7	-0.8	0.20495	1	1	1
ENSMUSG00000021518	PTDSS1	phosphatidylserine synthase 1	endoplasmic reticulum membrane|endoplasmic reticulum membrane|membrane|membrane|integral component of membrane|	phospholipid metabolic process|phosphatidylserine biosynthetic process|phosphatidylserine biosynthetic process|small molecule metabolic process|glycerophospholipid biosynthetic process|	transferase activity|	9	1.4	27.3	27.3	8	1.6	23.4	23.4	1.5	50.2	1e-05	1.1	2.1	0.20495	1	1	1
ENSMUSG00000028868	WASF2	WAS protein family, member 2	ruffle|intracellular|early endosome|cytosol|actin cytoskeleton|lamellipodium|SCAR complex|extracellular vesicular exosome|	angiogenesis|ameboidal cell migration|adenylate cyclase-modulating G-protein coupled receptor signaling pathway|positive regulation of lamellipodium assembly|Rac protein signal transduction|lamellipodium assembly|actin cytoskeleton organization|actin filament-based movement|megakaryocyte development|Fc-gamma receptor signaling pathway involved in phagocytosis|innate immune response|negative regul…	actin binding|protein binding|protein complex binding|protein complex binding|	10	-1.2	37.4	-37.4	10	-1	13.7	-13.7	-1.2	50.2	1e-05	-1.6	-0.9	0.20495	1	1	1
ENSMUSG00000079396	GM3411	predicted gene 3411	cellular_component|	biological_process|	molecular_function|	8	1.9	53.1	53.1	8	0	0	0	1.9	50	1e-05	1.5	2.9	0.20495	1	1	1
ENSMUSG00000024101	WASH	WAS protein family homolog	intracellular|cell|endosome|early endosome|early endosome|membrane|recycling endosome|WASH complex|	transport|endosomal transport|Arp2/3 complex-mediated actin nucleation|Arp2/3 complex-mediated actin nucleation|retrograde transport, endosome to Golgi|	actin binding|ubiquitin protein ligase binding|alpha-tubulin binding|	10	-1	33.6	-33.6	10	-1.2	16.5	-16.5	-1.1	49.4	1e-05	-1.6	-0.8	0.20495	1	1	1
ENSMUSG00000038845	PHB	prohibitin	nucleus|nucleus|nucleoplasm|cytoplasm|mitochondrion|mitochondrial inner membrane|integral component of plasma membrane|membrane|extracellular vesicular exosome|	negative regulation of transcription from RNA polymerase II promoter|osteoblast differentiation|DNA replication|regulation of transcription, DNA-templated|transcription from RNA polymerase II promoter|signal transduction|negative regulation of cell proliferation|negative regulation of transcription by competitive promoter binding|histone deacetylation|negative regulation of cell growth|regulation…	sequence-specific DNA binding RNA polymerase II transcription factor activity|protein binding|enzyme binding|histone deacetylase binding|transcription regulatory region DNA binding|	9	1.6	46.1	46.1	6	0.6	7.21	7.21	1.6	49.4	1e-05	1.2	2.3	0.20495	1	1	1
ENSMUSG00000026339	CCDC93	coiled-coil domain containing 93	None	None	None	10	-1.6	35.6	-35.6	10	-1.6	13.9	-13.9	-1.6	49.1	1e-05	-2.2	-1.2	0.20495	1	1	1
ENSMUSG00000027423	SNX5	sorting nexin 5	ruffle|phagocytic cup|cytoplasmic vesicle membrane|extrinsic component of cytoplasmic side of plasma membrane|extrinsic component of endosome membrane|early endosome membrane|macropinocytic cup|	intracellular protein transport|pinocytosis|	phosphatidylinositol binding|phosphatidylinositol binding|	9	-2.1	37	-37	9	-1.7	12.4	-12.4	-2	48.7	1e-05	-2.7	-1.3	0.20495	1	1	1
ENSMUSG00000022443	MYH9	myosin, heavy chain 9, non-muscle	stress fiber|ruffle|immunological synapse|uropod|nucleus|cytoplasm|spindle|actomyosin contractile ring|cytosol|plasma membrane|plasma membrane|cell-cell adherens junction|COP9 signalosome|integrin complex|actin cytoskeleton|membrane|myosin II complex|cortical cytoskeleton|cell leading edge|neuromuscular junction|cleavage furrow|actomyosin|protein complex|extracellular vesicular exosome|myosin II …	meiotic spindle organization|cytokinesis|angiogenesis|in utero embryonic development|establishment of T cell polarity|ATP catabolic process|membrane protein ectodomain proteolysis|integrin-mediated signaling pathway|axon guidance|myoblast fusion|regulation of cell shape|protein transport|single organismal cell-cell adhesion|actin filament-based movement|platelet formation|monocyte differentiation…	microfilament motor activity|motor activity|actin binding|protein binding|calmodulin binding|ATP binding|ATPase activity|actin-dependent ATPase activity|actin-dependent ATPase activity|protein homodimerization activity|protein anchor|ADP binding|poly(A) RNA binding|actin filament binding|actin filament binding|actin filament binding|	10	0.9	29	29	10	1	20	20	1	48.6	1e-05	0.7	1.3	0.20495	1	1	1
ENSMUSG00000021036	SPTLC2	serine palmitoyltransferase, long chain base subunit 2	mitochondrion|endoplasmic reticulum membrane|integral component of membrane|serine C-palmitoyltransferase complex|	sphingolipid metabolic process|sphingomyelin biosynthetic process|sphingolipid biosynthetic process|small molecule metabolic process|sphinganine biosynthetic process|sphingosine biosynthetic process|ceramide biosynthetic process|	serine C-palmitoyltransferase activity|pyridoxal phosphate binding|	10	-0.9	25.9	-25.9	10	-1.3	25.3	-25.3	-1	48.5	1e-05	-1.5	-0.8	0.20495	1	1	1
ENSMUSG00000032633	FLCN	folliculin	nucleus|cytoplasm|plasma membrane|midbody|cell-cell contact zone|	negative regulation of transcription from RNA polymerase II promoter|negative regulation of transcription from RNA polymerase II promoter|in utero embryonic development|regulation of protein phosphorylation|positive regulation of protein phosphorylation|cell-cell junction assembly|positive regulation of gene expression|negative regulation of gene expression|negative regulation of mitochondrion or…	protein binding|protein complex binding|	10	-1	35.8	-35.8	10	-1	13	-13	-1	48.5	1e-05	-1.7	-0.8	0.20495	1	1	1
ENSMUSG00000027411	VPS16	vacuolar protein sorting 16 homolog (S. cerevisiae)	lysosomal membrane|early endosome|late endosome|actin filament|axon|HOPS complex|late endosome membrane|neuronal cell body|recycling endosome|	intracellular protein transport|	actin filament binding|	10	-1.4	38.6	-38.6	10	-0.9	11.7	-11.7	-1.2	47.9	1e-05	-1.7	-0.9	0.20495	1	1	1
ENSMUSG00000040560	WDR7	WD repeat domain 7	None	None	None	10	-1.6	40.8	-40.8	10	-1.4	7.63	-7.63	-1.4	47.8	1e-05	-2.1	-1	0.20495	1	1	1
ENSMUSG00000090764	GM3127	predicted gene 3127	cellular_component|	biological_process|	molecular_function|	10	1.3	27	27	10	1.1	21.2	21.2	1.2	47.7	2e-05	0.8	1.7	0.00532338	1	1	1
ENSMUSG00000022952	RUNX1	runt-related transcription factor 1	basement membrane|nucleus|nucleus|	skeletal system development|in utero embryonic development|liver development|myeloid progenitor cell differentiation|transcription, DNA-templated|central nervous system development|regulation of signal transduction|hemopoiesis|hemopoiesis|myeloid cell differentiation|negative regulation of granulocyte differentiation|positive regulation of granulocyte differentiation|hair follicle morphogenesis|e…	regulatory region DNA binding|DNA binding|sequence-specific DNA binding transcription factor activity|sequence-specific DNA binding transcription factor activity|calcium ion binding|protein binding|ATP binding|transcription factor binding|protein homodimerization activity|protein heterodimerization activity|repressing transcription factor binding|	9	1.9	43.7	43.7	9	1.1	6.51	6.51	1.8	47.5	2e-05	0.8	2.5	0.00532338	1	1	1
ENSMUSG00000090643	GM3453	predicted gene 3453	cellular_component|	biological_process|	molecular_function|	10	1.3	28.1	28.1	9	1.2	19.4	19.4	1.2	47	2e-05	0.8	1.7	0.00532338	1	1	1
ENSMUSG00000032637	ATXN2L	ataxin 2-like	cytoplasm|cytoplasmic stress granule|membrane|nuclear speck|	regulation of cytoplasmic mRNA processing body assembly|stress granule assembly|	protein binding|poly(A) RNA binding|	10	-1.6	30.6	-30.6	10	-1.6	16.9	-16.9	-1.6	47	2e-05	-2.1	-0.8	0.00532338	1	1	1
ENSMUSG00000048076	ARF1	ADP-ribosylation factor 1	Golgi membrane|cytosol|plasma membrane|postsynaptic density|sarcomere|cell junction|neuron projection|postsynaptic membrane|perinuclear region of cytoplasm|extracellular vesicular exosome|	regulation of receptor internalization|GTP catabolic process|phospholipid metabolic process|phosphatidylinositol biosynthetic process|cellular copper ion homeostasis|retrograde vesicle-mediated transport, Golgi to ER|post-Golgi vesicle-mediated transport|small GTPase mediated signal transduction|protein transport|viral process|antigen processing and presentation of exogenous peptide antigen via M…	GTPase activity|receptor signaling protein activity|protein binding|GTP binding|poly(A) RNA binding|	9	-1.7	40.6	-40.6	9	-1	6.54	-6.54	-1.6	46.3	2e-05	-2.3	-1	0.00532338	1	1	1
ENSMUSG00000039087	RREB1	ras responsive element binding protein 1	nucleus|nucleus|nucleolus|cytoplasm|cytoplasm|nuclear body|nuclear speck|extracellular vesicular exosome|	regulation of transcription, DNA-templated|transcription from RNA polymerase II promoter|Ras protein signal transduction|multicellular organismal development|negative regulation of transcription, DNA-templated|positive regulation of transcription, DNA-templated|	DNA binding|sequence-specific DNA binding transcription factor activity|metal ion binding|	9	1	22.4	22.4	9	1.9	26.9	26.9	0.9	46.2	2e-05	0.7	2.2	0.00532338	1	1	1
ENSMUSG00000037428	VGF	VGF nerve growth factor inducible	extracellular space|transport vesicle|cytoplasmic vesicle|	ovarian follicle development|response to dietary excess|generation of precursor metabolites and energy|response to cold|sexual reproduction|insulin secretion|response to insulin|glucose homeostasis|defense response to bacterium|response to cAMP|	molecular_function|neuropeptide hormone activity|growth factor activity|	10	-1.8	25.6	-25.6	10	-2.1	19.7	-19.7	-1.8	44.7	2e-05	-3	-1.1	0.00532338	1	1	1
ENSMUSG00000074576	MOCS3	molybdenum cofactor synthesis 3	cytosol|cytosol|	tRNA wobble uridine modification|tRNA wobble position uridine thiolation|vitamin metabolic process|water-soluble vitamin metabolic process|Mo-molybdopterin cofactor biosynthetic process|protein adenylylation|enzyme active site formation via L-cysteine persulfide|molybdopterin cofactor biosynthetic process|protein urmylation|tRNA thio-modification|small molecule metabolic process|	thiosulfate sulfurtransferase activity|protein binding|ATP binding|nucleotidyltransferase activity|sulfurtransferase activity|sulfurtransferase activity|URM1 activating enzyme activity|metal ion binding|molybdopterin-synthase sulfurtransferase activity|molybdopterin-synthase adenylyltransferase activity|protein adenylyltransferase activity|	10	0.8	27	27	10	0.8	18	18	0.8	44.6	2e-05	0.6	1.1	0.00532338	1	1	1
ENSMUSG00000020220	VPS13D	vacuolar protein sorting 13 homolog D (S. cerevisiae)	extracellular vesicular exosome|	None	None	8	1.5	31.2	31.2	6	1.4	13	13	1.5	43.7	3e-05	1	2.2	0.00723353	1	1	1
ENSMUSG00000035376	PTPLB	protein tyrosine phosphatase-like (proline instead of catalytic arginine), member b	endoplasmic reticulum membrane|integral component of membrane|	fatty acid biosynthetic process|	protein binding|lyase activity|	10	-0.8	20.9	-20.9	9	-1.8	24.3	-24.3	-1.4	43.6	3e-05	-2.1	-0.9	0.00723353	1	1	1
ENSMUSG00000029202	PDS5A	PDS5, regulator of cohesion maintenance, homolog A (S. cerevisiae)	chromosome, centromeric region|chromatin|nucleus|nucleoplasm|chromosome|cytosol|plasma membrane|	mitotic cell cycle|mitotic nuclear division|negative regulation of DNA replication|	protein binding|	10	1.5	12.5	12.5	10	1.8	32.1	32.1	1.5	43.5	3e-05	0.7	2.4	0.00723353	1	1	1
ENSMUSG00000002812	FLII	flightless I homolog (Drosophila)	nucleus|cytoplasm|microtubule organizing center|focal adhesion|	transcription, DNA-templated|regulation of transcription, DNA-templated|muscle contraction|multicellular organismal development|	actin binding|protein binding|	10	1.8	41.1	41.1	8	1	4.37	4.37	1.7	43.4	3e-05	1	2.4	0.00723353	1	1	1
ENSMUSG00000042229	RABIF	RAB interacting factor	None	small GTPase mediated signal transduction|protein transport|positive regulation of GTPase activity|positive regulation of GTPase activity|positive regulation of GTPase activity|membrane fusion|	guanyl-nucleotide exchange factor activity|protein binding|zinc ion binding|	10	-1.5	24.1	-24.1	10	-1.3	19.7	-19.7	-1.4	43.3	3e-05	-1.9	-0.9	0.00723353	1	1	1
ENSMUSG00000042705	COMMD10	COMM domain containing 10	None	None	protein binding|	10	-1.1	31.5	-31.5	10	-1	12.3	-12.3	-1.1	43.3	3e-05	-1.5	-0.8	0.00723353	1	1	1
ENSMUSG00000094706	GM10338	predicted gene 10338	cellular_component|	biological_process|	molecular_function|	10	1.4	24.6	24.6	10	1.2	18.8	18.8	1.3	42.5	3e-05	0.9	1.8	0.00723353	1	1	1
ENSMUSG00000006728	CDK4	cyclin-dependent kinase 4	cyclin-dependent protein kinase holoenzyme complex|chromatin|nucleus|nucleoplasm|transcription factor complex|nucleolus|cytosol|cytosol|tight junction|nuclear membrane|perinuclear region of cytoplasm|	G1/S transition of mitotic cell cycle|mitotic cell cycle|protein phosphorylation|signal transduction|circadian rhythm|positive regulation of cell proliferation|response to toxic substance|response to lead ion|regulation of gene expression|positive regulation of G2/M transition of mitotic cell cycle|organ regeneration|response to testosterone|response to drug|positive regulation of apoptotic proce…	cyclin-dependent protein serine/threonine kinase activity|protein binding|ATP binding|cyclin binding|protein complex binding|	10	1.6	29.3	29.3	7	2.5	16.9	16.9	2.2	42.3	3e-05	1.2	3.3	0.00723353	1	1	1
ENSMUSG00000030751	PSMA1	proteasome (prosome, macropain) subunit, alpha type, 1	proteasome complex|nucleus|nucleoplasm|centrosome|cytosol|proteasome core complex|polysome|proteasome core complex, alpha-subunit complex|extracellular vesicular exosome|	G1/S transition of mitotic cell cycle|protein polyubiquitination|mitotic cell cycle|antigen processing and presentation of peptide antigen via MHC class I|antigen processing and presentation of exogenous peptide antigen via MHC class I, TAP-dependent|regulation of cellular amino acid metabolic process|apoptotic process|DNA damage response, signal transduction by p53 class mediator resulting in ce…	RNA binding|threonine-type endopeptidase activity|protein binding|	8	1.2	11.9	11.9	9	2.4	34	34	2.3	42.1	3e-05	1.1	3.4	0.00723353	1	1	1
ENSMUSG00000020048	HSP90B1	heat shock protein 90kDa beta (Grp94), member 1	extracellular region|nucleus|endoplasmic reticulum|endoplasmic reticulum|endoplasmic reticulum lumen|endoplasmic reticulum lumen|endoplasmic reticulum membrane|cytosol|plasma membrane|membrane|midbody|melanosome|perinuclear region of cytoplasm|extracellular vesicular exosome|endocytic vesicle lumen|	response to hypoxia|toll-like receptor signaling pathway|protein folding|activation of signaling protein activity involved in unfolded protein response|protein transport|ER-associated ubiquitin-dependent protein catabolic process|endoplasmic reticulum unfolded protein response|actin rod assembly|negative regulation of apoptotic process|negative regulation of apoptotic process|regulation of phosph…	RNA binding|calcium ion binding|protein binding|ATP binding|protein phosphatase binding|virion binding|low-density lipoprotein particle receptor binding|unfolded protein binding|	10	-1.3	33.4	-33.4	10	-1.1	9.36	-9.36	-1.3	42.1	3e-05	-1.7	-1	0.00723353	1	1	1
ENSMUSG00000073775	KTI12	KTI12 homolog, chromatin associated (S. cerevisiae)	None	None	ATP binding|	10	1.1	16.7	16.7	9	1.9	28.3	28.3	1.2	41.9	3e-05	0.7	2.3	0.00723353	1	1	1
ENSMUSG00000079378	GM8279	predicted gene 8279	cellular_component|	biological_process|	molecular_function|	10	1.4	22.9	22.9	9	1.2	19.8	19.8	1.3	41.8	3e-05	1	1.9	0.00723353	1	1	1
ENSMUSG00000020366	MAPK9	mitogen-activated protein kinase 9	nucleoplasm|mitochondrion|cytosol|	release of cytochrome c from mitochondria|positive regulation of protein phosphorylation|toll-like receptor signaling pathway|MyD88-dependent toll-like receptor signaling pathway|MyD88-independent toll-like receptor signaling pathway|protein targeting to mitochondrion|activation of cysteine-type endopeptidase activity involved in apoptotic process|response to stress|JNK cascade|JNK cascade|JUN ph…	JUN kinase activity|protein binding|ATP binding|transcription factor binding|cysteine-type endopeptidase activator activity involved in apoptotic process|mitogen-activated protein kinase kinase kinase binding|	10	0.7	24.4	24.4	10	0.8	18.1	18.1	0.8	41.8	3e-05	0.6	1.2	0.00723353	1	1	1
ENSMUSG00000031278	ACSL4	acyl-CoA synthetase long-chain family member 4	cytoplasm|mitochondrial outer membrane|peroxisomal membrane|endoplasmic reticulum membrane|lipid particle|membrane|integral component of membrane|neuronal cell body|extracellular vesicular exosome|	long-chain fatty acid metabolic process|long-chain fatty acid metabolic process|lipid metabolic process|response to nutrient|lipid biosynthetic process|fatty acid transport|triglyceride biosynthetic process|positive regulation of cell growth|negative regulation of prostaglandin secretion|long-chain fatty-acyl-CoA biosynthetic process|cellular lipid metabolic process|small molecule metabolic proce…	long-chain fatty acid-CoA ligase activity|ATP binding|very long-chain fatty acid-CoA ligase activity|arachidonate-CoA ligase activity|	10	-0.9	35.6	-35.6	10	-0.8	6.71	-6.71	-0.9	41.8	3e-05	-1.4	-0.6	0.00723353	1	1	1
ENSMUSG00000025544	TM9SF2	transmembrane 9 superfamily member 2	endosome|integral component of plasma membrane|endosome membrane|extracellular vesicular exosome|	transport|	None	10	-0.7	18.6	-18.6	10	-1.5	24.5	-24.5	-1.4	41.7	3e-05	-1.9	-0.8	0.00723353	1	1	1
ENSMUSG00000038671	ARFRP1	ADP-ribosylation factor related protein 1	Golgi apparatus|trans-Golgi network|membrane|	GTP catabolic process|signal transduction|small GTPase mediated signal transduction|gastrulation|protein localization to Golgi apparatus|retrograde transport, endosome to Golgi|Golgi to plasma membrane protein transport|	GTPase activity|protein binding|GTP binding|	8	0.9	14.1	14.1	8	1.9	31	31	1.3	40.8	3e-05	0.7	2.5	0.00723353	1	1	1
ENSMUSG00000056201	CFL1	cofilin 1 (non-muscle)	extracellular space|nucleus|cytoplasm|membrane|nuclear matrix|cortical actin cytoskeleton|lamellipodium membrane|ruffle membrane|extracellular vesicular exosome|	neural crest cell migration|neural fold formation|platelet degranulation|protein phosphorylation|protein import into nucleus|cytoskeleton organization|Rho protein signal transduction|axon guidance|blood coagulation|response to virus|regulation of cell morphogenesis|establishment of cell polarity|actin cytoskeleton organization|actin filament depolymerization|platelet activation|positive regulatio…	actin binding|protein binding|	8	-2	40.4	-40.4	8	-0.9	2.75	-2.75	-1.8	40.8	3e-05	-2.8	-1.1	0.00723353	1	1	1
ENSMUSG00000063410	STK24	serine/threonine kinase 24	nucleus|nucleoplasm|nucleolus|cytoplasm|cytosol|membrane|extracellular vesicular exosome|	protein phosphorylation|apoptotic process|cellular component disassembly involved in execution phase of apoptosis|signal transduction|intrinsic apoptotic signaling pathway in response to oxidative stress|signal transduction by phosphorylation|negative regulation of cell migration|protein autophosphorylation|regulation of axon regeneration|execution phase of apoptosis|	protein kinase activity|protein serine/threonine kinase activity|protein binding|ATP binding|metal ion binding|	10	1.4	28.9	28.9	8	1	13.2	13.2	1.3	40.7	3e-05	0.9	1.9	0.00723353	1	1	1
ENSMUSG00000032060	CRYAB	crystallin, alpha B	nucleus|cytoplasm|mitochondrion|Golgi apparatus|cytosol|plasma membrane|cell surface|microtubule cytoskeleton|Z disc|actin filament bundle|extracellular vesicular exosome|	response to hypoxia|lens development in camera-type eye|glucose metabolic process|protein folding|muscle contraction|tubulin complex assembly|muscle organ development|aging|negative regulation of gene expression|regulation of cell death|negative regulation of cell growth|microtubule polymerization or depolymerization|response to estradiol|negative regulation of intracellular transport|response to…	structural constituent of eye lens|protein binding|microtubule binding|identical protein binding|protein homodimerization activity|metal ion binding|unfolded protein binding|	10	-1.3	24.8	-24.8	10	-1.2	15.8	-15.8	-1.3	40.1	3e-05	-1.8	-0.9	0.00723353	1	1	1
ENSMUSG00000028062	LAMTOR2	late endosomal/lysosomal adaptor, MAPK and MTOR activator 2	lysosomal membrane|late endosome|extracellular vesicular exosome|Ragulator complex|	activation of MAPKK activity|cell growth|positive regulation of TOR signaling|cellular protein localization|positive regulation of GTPase activity|cellular response to amino acid stimulus|	guanyl-nucleotide exchange factor activity|protein binding|protein complex scaffold|	8	-2	38.9	-38.9	8	-1.1	3.59	-3.59	-1.8	40.1	3e-05	-2.7	-1	0.00723353	1	1	1
ENSMUSG00000073409	H2-Q6	histocompatibility 2, Q region locus 6	endoplasmic reticulum|Golgi apparatus|Golgi medial cisterna|cell surface|membrane|MHC class I protein complex|extracellular vesicular exosome|endoplasmic reticulum exit site|	None	receptor binding|beta-2-microglobulin binding|peptide binding|peptide antigen binding|T cell receptor binding|poly(A) RNA binding|TAP binding|protein heterodimerization activity|	9	2	26.7	26.7	9	2.5	14.5	14.5	2.3	39.9	3e-05	1.7	4.3	0.00723353	1	1	1
ENSMUSG00000013663	PTEN	phosphatase and tensin homolog	nucleus|cytoplasm|cytoplasm|mitochondrion|cytosol|plasma membrane|cytoplasmic side of plasma membrane|PML body|myelin sheath adaxonal region|cell projection|neuron projection|dendritic spine|Schmidt-Lanterman incisure|postsynaptic membrane|	regulation of cyclin-dependent protein serine/threonine kinase activity|angiogenesis|negative regulation of protein phosphorylation|regulation of B cell apoptotic process|protein dephosphorylation|protein dephosphorylation|phospholipid metabolic process|phosphatidylinositol biosynthetic process|apoptotic process|activation of mitotic anaphase-promoting complex activity|epidermal growth factor rec…	magnesium ion binding|phosphatidylinositol-3-phosphatase activity|phosphoprotein phosphatase activity|protein serine/threonine phosphatase activity|protein tyrosine phosphatase activity|platelet-derived growth factor receptor binding|protein binding|protein tyrosine/serine/threonine phosphatase activity|lipid binding|anaphase-promoting complex binding|phosphatidylinositol-3,4,5-trisphosphate 3-ph…	10	-0.8	32.4	-32.4	10	-0.9	7.85	-7.85	-0.8	39.7	3e-05	-1.3	-0.6	0.00723353	1	1	1
ENSMUSG00000010608	RBM25	RNA binding motif protein 25	nucleus|spliceosomal complex|cytoplasm|nuclear speck|	regulation of alternative mRNA splicing, via spliceosome|mRNA processing|RNA splicing|regulation of apoptotic process|	nucleotide binding|mRNA binding|protein binding|poly(A) RNA binding|	10	1.3	14.4	14.4	10	1.9	27.5	27.5	1.4	39.4	3e-05	0.9	2.7	0.00723353	1	1	1
ENSMUSG00000041747	UTP15	UTP15, U3 small nucleolar ribonucleoprotein, homolog (S. cerevisiae)	nucleolus|cytoplasm|	rRNA processing|	poly(A) RNA binding|	10	1.1	24.4	24.4	9	1.1	15	15	1.1	39.1	3e-05	0.8	1.6	0.00723353	1	1	1
ENSMUSG00000040028	ELAVL1	ELAV like RNA binding protein 1	nucleus|nucleoplasm|cytoplasm|cytosol|membrane|	multicellular organismal development|gene expression|RNA metabolic process|mRNA metabolic process|positive regulation of translation|mRNA stabilization|mRNA stabilization|3'-UTR-mediated mRNA stabilization|3'-UTR-mediated mRNA stabilization|regulation of stem cell maintenance|	nucleotide binding|RNA binding|double-stranded RNA binding|mRNA binding|mRNA 3'-UTR binding|protein binding|AU-rich element binding|protein kinase binding|mRNA 3'-UTR AU-rich region binding|poly(A) RNA binding|	9	-0.7	20.4	-20.4	9	-1.2	20.6	-20.6	-0.9	38.9	4e-05	-1.5	-0.6	0.0075211	1	1	1
ENSMUSG00000087075	A230065H16RIK	RIKEN cDNA A230065H16 gene	cellular_component|	biological_process|	molecular_function|	10	-1.6	15.7	-15.7	10	-1.7	23.7	-23.7	-1.6	38.8	4e-05	-2.4	-1.1	0.0075211	1	1	1
ENSMUSG00000079409	GM5795	predicted gene 5795	cellular_component|	biological_process|	molecular_function|	10	1.4	20.9	20.9	10	1.2	18.8	18.8	1.3	38.7	4e-05	0.9	1.9	0.0075211	1	1	1
ENSMUSG00000095533	GM10413	predicted gene 10413	cellular_component|	biological_process|	molecular_function|	10	1.4	20.9	20.9	10	1.2	18.8	18.8	1.3	38.7	4e-05	0.9	1.9	0.0075211	1	1	1
ENSMUSG00000095368	GM3012	predicted gene 3012	cellular_component|	biological_process|	molecular_function|	10	1.4	20.9	20.9	10	1.2	18.8	18.8	1.3	38.7	4e-05	0.9	1.9	0.0075211	1	1	1
ENSMUSG00000025351	CD63	CD63 molecule	lysosomal membrane|plasma membrane|integral component of plasma membrane|cell surface|endosome membrane|platelet dense granule membrane|intrinsic component of plasma membrane|late endosome membrane|melanosome|extracellular vesicular exosome|multivesicular body, internal vesicle|	positive regulation of receptor internalization|platelet degranulation|cell-matrix adhesion|blood coagulation|protein transport|cell migration|platelet activation|cellular protein localization|endosome to melanosome transport|pigment granule maturation|regulation of vascular endothelial growth factor signaling pathway|regulation of rubidium ion transport|positive regulation of integrin-mediated s…	protein binding|	9	1.4	28.7	28.7	9	0.8	12.5	12.5	1.3	38.7	4e-05	0.9	1.9	0.0075211	1	1	1
ENSMUSG00000058006	MDN1	MDN1, midasin homolog (yeast)	nucleus|nucleus|nucleolus|cytoplasm|membrane|intermediate filament cytoskeleton|	ATP catabolic process|ATP catabolic process|protein complex assembly|	protein binding|ATP binding|ATPase activity|unfolded protein binding|	10	1.8	28.6	28.6	10	1	13.1	13.1	1.5	38.6	4e-05	0.7	2.2	0.0075211	1	1	1
ENSMUSG00000026174	RQCD1	RCD1 required for cell differentiation1 homolog (S. pombe)	cytoplasmic mRNA processing body|nucleus|cytosol|membrane|CCR4-NOT complex|	nuclear-transcribed mRNA catabolic process, deadenylation-dependent decay|nuclear-transcribed mRNA poly(A) tail shortening|transcription, DNA-templated|regulation of transcription, DNA-templated|regulation of translation|sex differentiation|gene expression|RNA metabolic process|mRNA metabolic process|cytokine-mediated signaling pathway|gene silencing by RNA|negative regulation of intracellular es…	protein binding|	10	0.7	19.1	19.1	10	1.8	26.2	26.2	1.6	38.3	4e-05	0.7	2.4	0.0075211	1	1	1
ENSMUSG00000038784	CNOT4	CCR4-NOT transcription complex, subunit 4	nucleus|cytosol|CCR4-NOT complex|	nuclear-transcribed mRNA catabolic process, deadenylation-dependent decay|nuclear-transcribed mRNA poly(A) tail shortening|gene expression|RNA metabolic process|mRNA metabolic process|protein autoubiquitination|	nucleotide binding|ubiquitin-protein transferase activity|protein binding|zinc ion binding|ligase activity|poly(A) RNA binding|	7	1.8	27.3	27.3	7	0.9	15	15	1.6	38.2	4e-05	0.7	2.2	0.0075211	1	1	1
ENSMUSG00000046711	HMGA1	high mobility group AT-hook 1	nucleus|nucleoplasm|transcription factor complex|cytosol|senescence-associated heterochromatin focus|	DNA catabolic process, endonucleolytic|DNA unwinding involved in DNA replication|base-excision repair|nucleosome disassembly|transcription, DNA-templated|regulation of transcription, DNA-templated|protein complex assembly|negative regulation of cell proliferation|response to virus|viral process|negative regulation of chromatin silencing|senescence-associated heterochromatin focus assembly|negativ…	DNA binding|AT DNA binding|sequence-specific DNA binding transcription factor activity|DNA-(apurinic or apyrimidinic site) lyase activity|protein binding|transcription factor binding|enzyme binding|ligand-dependent nuclear receptor transcription coactivator activity|retinoic acid receptor binding|peroxisome proliferator activated receptor binding|retinoid X receptor binding|5'-deoxyribose-5-phosp…	10	-1.1	29.2	-29.2	10	-1.4	9.75	-9.75	-1.2	38.2	4e-05	-1.7	-0.8	0.0075211	1	1	1
ENSMUSG00000092329	GM20388	N/A	None	None	None	10	-0.9	19.8	-19.8	10	-1.6	21.5	-21.5	-1.1	37.8	4e-05	-1.9	-0.8	0.0075211	1	1	1
ENSMUSG00000050552	LAMTOR4	late endosomal/lysosomal adaptor, MAPK and MTOR activator 4	lysosome|intracellular membrane-bounded organelle|Ragulator complex|	regulation of cell size|positive regulation of TOR signaling|positive regulation of GTPase activity|protein localization to lysosome|cellular response to amino acid stimulus|	guanyl-nucleotide exchange factor activity|protein complex scaffold|	10	-0.8	31.4	-31.4	10	-0.7	6.77	-6.77	-0.8	37.8	4e-05	-1.2	-0.6	0.0075211	1	1	1
ENSMUSG00000025134	ALYREF	Aly/REF export factor	transcription export complex|nucleoplasm|cytosol|membrane|nuclear speck|exon-exon junction complex|extracellular vesicular exosome|catalytic step 2 spliceosome|	regulation of DNA recombination|mRNA splicing, via spliceosome|mRNA splicing, via spliceosome|osteoblast differentiation|transcription from RNA polymerase II promoter|termination of RNA polymerase II transcription|mRNA export from nucleus|mRNA export from nucleus|RNA splicing|gene expression|mRNA 3'-end processing|replication fork processing|positive regulation of DNA-templated transcription, elo…	nucleotide binding|protein binding|poly(A) RNA binding|	9	-1	27.3	-27.3	9	-1	10.7	-10.7	-1	37.7	4e-05	-1.5	-0.8	0.0075211	1	1	1
ENSMUSG00000074622	MAFB	v-maf avian musculoaponeurotic fibrosarcoma oncogene homolog B	nucleus|transcription factor complex|	transcription, DNA-templated|segment specification|sensory organ development|respiratory gaseous exchange|rhombomere 5 development|rhombomere 6 development|T cell differentiation in thymus|brain segmentation|inner ear morphogenesis|negative regulation of erythrocyte differentiation|positive regulation of transcription from RNA polymerase II promoter|thymus development|	sequence-specific DNA binding transcription factor activity|protein binding|transcription factor binding|sequence-specific DNA binding|	10	-1	24	-24	10	-1.1	14.1	-14.1	-0.9	37.6	4e-05	-1.5	-0.6	0.0075211	1	1	1
ENSMUSG00000031922	CEP57	centrosomal protein 57kDa	nucleus|nucleus|cytoplasm|Golgi apparatus|centrosome|cytosol|microtubule|microtubule cytoskeleton|	protein import into nucleus, translocation|G2/M transition of mitotic cell cycle|mitotic cell cycle|spermatid development|fibroblast growth factor receptor signaling pathway|microtubule anchoring|protein homooligomerization|	protein binding|microtubule binding|fibroblast growth factor binding|protein homodimerization activity|gamma-tubulin binding|	9	1.9	33.1	33.1	9	0.9	8.12	8.12	1.9	37.6	4e-05	0.7	2.8	0.0075211	1	1	1
ENSMUSG00000033809	ALG3	ALG3, alpha-1,3- mannosyltransferase	endoplasmic reticulum membrane|endoplasmic reticulum membrane|integral component of membrane|	protein glycosylation|dolichol-linked oligosaccharide biosynthetic process|protein N-linked glycosylation via asparagine|post-translational protein modification|cellular protein metabolic process|mannosylation|mannosylation|	alpha-1,3-mannosyltransferase activity|dol-P-Man:Man(5)GlcNAc(2)-PP-Dol alpha-1,3-mannosyltransferase activity|	10	-0.8	24.3	-24.3	10	-1	13.8	-13.8	-0.9	37.5	4e-05	-1.4	-0.6	0.0075211	1	1	1
ENSMUSG00000002660	CLPP	caseinolytic mitochondrial matrix peptidase proteolytic subunit	mitochondrion|mitochondrial matrix|endopeptidase Clp complex|	protein homooligomerization|proteolysis involved in cellular protein catabolic process|	serine-type endopeptidase activity|protein binding|peptidase activity|identical protein binding|	9	1.2	22.5	22.5	9	1.1	15.1	15.1	1.2	37.2	4e-05	0.7	1.7	0.0075211	1	1	1
ENSMUSG00000039231	SUV39H1	suppressor of variegation 3-9 homolog 1 (Drosophila)	chromosome, centromeric region|heterochromatin|condensed nuclear chromosome|nucleus|nuclear lamina|nucleoplasm|chromatin silencing complex|rDNA heterochromatin|	chromatin silencing at rDNA|chromatin organization|transcription, DNA-templated|rRNA processing|cell cycle|viral process|cell differentiation|histone H3-K9 dimethylation|histone H3-K9 trimethylation|negative regulation of circadian rhythm|negative regulation of transcription, DNA-templated|rhythmic process|	transcription regulatory region sequence-specific DNA binding|chromatin binding|protein binding|zinc ion binding|S-adenosylmethionine-dependent methyltransferase activity|histone-lysine N-methyltransferase activity|histone methyltransferase activity|histone methyltransferase activity (H3-K9 specific)|protein N-terminus binding|	10	1.9	31.1	31.1	10	0.8	9.28	9.28	0.5	37.2	4e-05	0.4	2.2	0.0075211	1	1	1
ENSMUSG00000052798	NUP107	nucleoporin 107kDa	kinetochore|condensed chromosome kinetochore|nucleus|nuclear envelope|nuclear pore|centrosome|cytosol|membrane|nuclear pore outer ring|nuclear pore outer ring|nuclear membrane|nuclear periphery|	mitotic cell cycle|carbohydrate metabolic process|mRNA export from nucleus|mitotic nuclear envelope disassembly|hexose transport|regulation of glucose transport|protein transport|glucose transport|viral process|cytokine-mediated signaling pathway|small molecule metabolic process|nuclear pore complex assembly|transmembrane transport|	nucleocytoplasmic transporter activity|protein binding|structural constituent of nuclear pore|	10	1.5	19.2	19.2	10	1.2	18.7	18.7	1.4	37.1	4e-05	0.9	2	0.0075211	1	1	1
ENSMUSG00000020706	FTSJ3	FtsJ homolog 3 (E. coli)	nucleus|nucleolus|preribosome, small subunit precursor|	enzyme-directed rRNA 2'-O-methylation|	protein binding|rRNA methyltransferase activity|poly(A) RNA binding|	9	1	24.2	24.2	9	1	13.2	13.2	1	37	4e-05	0.7	1.5	0.0075211	1	1	1
ENSMUSG00000059498	FCGR3	Fc receptor, IgG, low affinity III	cell|plasma membrane|membrane|integral component of membrane|extracellular vesicular exosome|	antibody-dependent cellular cytotoxicity|positive regulation of type IIa hypersensitivity|positive regulation of type III hypersensitivity|positive regulation of type I hypersensitivity|positive regulation of type I hypersensitivity|serotonin secretion|phagocytosis, recognition|phagocytosis, engulfment|cell surface receptor signaling pathway|neutrophil chemotaxis|Fc-gamma receptor signaling pathw…	IgG receptor activity|IgG receptor activity|IgG binding|	10	-1	25.3	-25.3	10	-1	11.9	-11.9	-1	36.7	6e-05	-1.5	-0.7	0.00953256	1	1	1
ENSMUSG00000057963	ITPK1	inositol-tetrakisphosphate 1-kinase	cytosol|	signal transduction|blood coagulation|phosphorylation|dephosphorylation|inositol trisphosphate metabolic process|inositol phosphate metabolic process|small molecule metabolic process|	magnesium ion binding|catalytic activity|ATP binding|isomerase activity|inositol tetrakisphosphate 1-kinase activity|inositol-1,3,4-trisphosphate 6-kinase activity|inositol-1,3,4-trisphosphate 5-kinase activity|inositol-1,3,4,5,6-pentakisphosphate 1-phosphatase activity|inositol-1,3,4,6-tetrakisphosphate 6-phosphatase activity|inositol-1,3,4,6-tetrakisphosphate 1-phosphatase activity|inositol-3,4…	10	0.9	29.6	29.6	10	0.6	7.79	7.79	0.8	36.6	6e-05	0.6	1.2	0.00953256	1	1	1
ENSMUSG00000032350	GCLC	glutamate-cysteine ligase, catalytic subunit	cytoplasm|cytosol|glutamate-cysteine ligase complex|	sulfur amino acid metabolic process|cysteine metabolic process|glutamate metabolic process|glutathione biosynthetic process|glutathione biosynthetic process|glutathione biosynthetic process|glutathione biosynthetic process|xenobiotic metabolic process|response to oxidative stress|apoptotic mitochondrial changes|response to heat|response to hormone|L-ascorbic acid metabolic process|negative regula…	magnesium ion binding|glutamate-cysteine ligase activity|glutamate-cysteine ligase activity|ATP binding|glutamate binding|ADP binding|protein heterodimerization activity|coenzyme binding|	10	0.9	23.4	23.4	10	0.8	13.8	13.8	0.8	36.5	6e-05	0.6	1.2	0.00953256	1	1	1
ENSMUSG00000049539	HIST1H1A	histone cluster 1, H1a	nucleosome|nuclear chromatin|nuclear euchromatin|	nucleosome assembly|spermatogenesis|	protein binding|chromatin DNA binding|	10	-0.8	22.1	-22.1	10	-1.5	17.8	-17.8	-0.9	36.4	6e-05	-1.7	-0.7	0.00953256	1	1	1
ENSMUSG00000039244	E130309D02RIK	RIKEN cDNA E130309D02 gene	cellular_component|	biological_process|	molecular_function|	10	-0.8	32.8	-32.8	10	-0.6	4.46	-4.46	-0.7	36.3	6e-05	-1.8	-0.5	0.00953256	1	1	1
ENSMUSG00000019943	ATP2B1	ATPase, Ca++ transporting, plasma membrane 1	plasma membrane|integral component of plasma membrane|membrane|extracellular vesicular exosome|	transport|blood coagulation|metabolic process|ion transmembrane transport|transmembrane transport|calcium ion transmembrane transport|	calcium-transporting ATPase activity|protein binding|calmodulin binding|ATP binding|metal ion binding|	10	-1.6	24.4	-24.4	10	-1.4	12.3	-12.3	-1.4	36.2	6e-05	-2.1	-1	0.00953256	1	1	1
ENSMUSG00000033124	ATG9A	autophagy related 9A	pre-autophagosomal structure|autophagic vacuole membrane|endosome|autophagic vacuole|endoplasmic reticulum membrane|trans-Golgi network|membrane|integral component of membrane|cytoplasmic vesicle|late endosome membrane|	autophagic vacuole assembly|mitochondrion degradation|protein transport|protein localization to Golgi apparatus|protein localization to pre-autophagosomal structure|piecemeal microautophagy of nucleus|late nucleophagy|innate immune response|	protein binding|	9	0.8	7.52	7.52	10	1.9	32.8	32.8	1.8	36.1	6e-05	1	3	0.00953256	1	1	1
ENSMUSG00000033352	MAP2K4	mitogen-activated protein kinase kinase 4	nucleus|cytosol|dendrite cytoplasm|perikaryon|	toll-like receptor signaling pathway|MyD88-dependent toll-like receptor signaling pathway|MyD88-independent toll-like receptor signaling pathway|apoptotic process|signal transduction|JNK cascade|activation of JUN kinase activity|peptidyl-tyrosine phosphorylation|toll-like receptor 2 signaling pathway|toll-like receptor 3 signaling pathway|toll-like receptor 4 signaling pathway|toll-like receptor …	protein kinase activity|protein serine/threonine kinase activity|protein tyrosine kinase activity|protein binding|ATP binding|JUN kinase kinase activity|mitogen-activated protein kinase kinase kinase binding|	10	1.2	21.3	21.3	10	1.1	15.2	15.2	1.1	36.1	6e-05	0.6	1.6	0.00953256	1	1	1
ENSMUSG00000063273	NAA15	N(alpha)-acetyltransferase 15, NatA auxiliary subunit	nucleus|transcription factor complex|cytoplasm|membrane|NatA complex|	angiogenesis|transcription, DNA-templated|N-terminal protein amino acid acetylation|cell differentiation|negative regulation of apoptotic process|positive regulation of transcription, DNA-templated|protein stabilization|	protein binding|N-acetyltransferase activity|acetyltransferase activity|ribosome binding|ribosome binding|poly(A) RNA binding|	9	1.8	22.3	22.3	9	1.4	14.8	14.8	1.7	36.1	6e-05	1	2.4	0.00953256	1	1	1
ENSMUSG00000003402	PRKCSH	protein kinase C substrate 80K-H	intracellular|endoplasmic reticulum|endoplasmic reticulum lumen|	in utero embryonic development|liver development|protein folding|N-glycan processing|nitrogen compound metabolic process|negative regulation of neuron projection development|protein N-linked glycosylation via asparagine|intracellular signal transduction|post-translational protein modification|cellular protein metabolic process|innate immune response|protein heterooligomerization|renal system deve…	RNA binding|protein kinase C binding|calcium ion binding|ion channel binding|phosphoprotein binding|	10	-1.5	23.9	-23.9	10	-1.5	12.1	-12.1	-1.5	35.7	6e-05	-2	-0.8	0.00953256	1	1	1
ENSMUSG00000071497	NUTF2-PS1	nuclear transport factor 2, pseudogene 1	None	None	None	9	2.3	27.5	27.5	9	1.7	9.79	9.79	2.3	35.7	6e-05	1.5	3.7	0.00953256	1	1	1
ENSMUSG00000022031	ELP3	elongator acetyltransferase complex subunit 3	nucleolus|cytoplasm|transcription elongation factor complex|DNA-directed RNA polymerase II, holoenzyme|Elongator holoenzyme complex|	chromatin organization|regulation of transcription from RNA polymerase II promoter|regulation of transcription from RNA polymerase II promoter|transcription elongation from RNA polymerase II promoter|histone acetylation|positive regulation of cell migration|regulation of protein kinase activity|	DNA binding|histone acetyltransferase activity|protein binding|phosphorylase kinase regulator activity|metal ion binding|iron-sulfur cluster binding|	9	0.9	14.4	14.4	9	1.7	25.6	25.6	1.5	35.6	6e-05	0.9	2.2	0.00953256	1	1	1
ENSMUSG00000026395	PTPRC	protein tyrosine phosphatase, receptor type, C	plasma membrane|integral component of plasma membrane|focal adhesion|external side of plasma membrane|membrane|membrane raft|extracellular vesicular exosome|	negative regulation of T cell mediated cytotoxicity|negative regulation of cytokine-mediated signaling pathway|hematopoietic progenitor cell differentiation|immunoglobulin biosynthetic process|negative regulation of protein kinase activity|negative regulation of protein kinase activity|protein dephosphorylation|negative regulation of cell adhesion involved in substrate-bound cell migration|cell s…	protein tyrosine phosphatase activity|transmembrane receptor protein tyrosine phosphatase activity|protein binding|protein kinase binding|	10	-0.9	24.1	-24.1	10	-0.8	11.7	-11.7	-0.9	35.3	6e-05	-1.2	-0.6	0.00953256	1	1	1
ENSMUSG00000030042	POLE4	polymerase (DNA-directed), epsilon 4, accessory subunit	nucleus|Ada2/Gcn5/Ada3 transcription activator complex|epsilon DNA polymerase complex|	DNA-dependent DNA replication|DNA-dependent DNA replication|histone H3 acetylation|	DNA-directed DNA polymerase activity|protein binding|sequence-specific DNA binding|protein heterodimerization activity|	9	-1.2	18.1	-18.1	9	-1.5	18.3	-18.3	-1.4	35.2	7e-05	-2.1	-1	0.0101032	1	1	0
ENSMUSG00000051355	COMMD1	copper metabolism (Murr1) domain containing 1	nucleus|cytoplasm|Cul2-RING ubiquitin ligase complex|extracellular vesicular exosome|	positive regulation of protein ubiquitination|negative regulation of NF-kappaB transcription factor activity|negative regulation of NF-kappaB transcription factor activity|regulation of proteasomal ubiquitin-dependent protein catabolic process|copper ion homeostasis|	copper ion binding|protein binding|identical protein binding|protein homodimerization activity|	10	-0.9	24.8	-24.8	10	-1.8	13.4	-13.4	-1	35.2	7e-05	-2	-0.8	0.0101032	1	1	0
ENSMUSG00000025130	P4HB	prolyl 4-hydroxylase, beta polypeptide	extracellular region|endoplasmic reticulum|endoplasmic reticulum lumen|endoplasmic reticulum-Golgi intermediate compartment|plasma membrane|procollagen-proline 4-dioxygenase complex|melanosome|extracellular vesicular exosome|	protein folding|peptidyl-proline hydroxylation to 4-hydroxy-L-proline|extracellular matrix organization|response to endoplasmic reticulum stress|lipoprotein metabolic process|small molecule metabolic process|cell redox homeostasis|cellular response to hypoxia|regulation of oxidative stress-induced intrinsic apoptotic signaling pathway|	protein disulfide isomerase activity|procollagen-proline 4-dioxygenase activity|protein binding|poly(A) RNA binding|protein heterodimerization activity|	10	-0.8	23.4	-23.4	10	-0.8	12.2	-12.2	-0.8	35.2	7e-05	-1.1	-0.5	0.0101032	1	1	0
ENSMUSG00000052684	JUN	jun proto-oncogene	nuclear chromosome|nucleoplasm|transcription factor complex|nuclear euchromatin|cytosol|transcriptional repressor complex|	angiogenesis|microglial cell activation|release of cytochrome c from mitochondria|liver development|positive regulation of endothelial cell proliferation|toll-like receptor signaling pathway|MyD88-dependent toll-like receptor signaling pathway|MyD88-independent toll-like receptor signaling pathway|outflow tract morphogenesis|transcription from RNA polymerase II promoter|transforming growth factor…	RNA polymerase II distal enhancer sequence-specific DNA binding|RNA polymerase II core promoter proximal region sequence-specific DNA binding transcription factor activity involved in positive regulation of transcription|RNA polymerase II activating transcription factor binding|RNA polymerase II transcription factor binding transcription factor activity involved in positive regulation of transcri…	10	1.2	26.8	26.8	10	0.9	9.48	9.48	1.1	35.1	7e-05	0.8	1.6	0.0101032	1	1	0
ENSMUSG00000024290	ROCK1	Rho-associated, coiled-coil containing protein kinase 1	Golgi membrane|ruffle|centriole|cytosol|cytoskeleton|plasma membrane|lamellipodium|bleb|	apical constriction|protein phosphorylation|apoptotic process|cellular component disassembly involved in execution phase of apoptosis|smooth muscle contraction|leukocyte cell-cell adhesion|signal transduction|Rho protein signal transduction|axon guidance|negative regulation of angiogenesis|membrane to membrane docking|actin cytoskeleton organization|regulation of cell adhesion|bleb assembly|regul…	protein kinase activity|protein serine/threonine kinase activity|protein binding|ATP binding|Rho GTPase binding|metal ion binding|	10	1	18.8	18.8	10	1.3	16.3	16.3	1.2	34.6	7e-05	0.7	1.7	0.0101032	1	1	0
ENSMUSG00000044408	SPTSSA	serine palmitoyltransferase, small subunit A	integral component of membrane|serine C-palmitoyltransferase complex|	sphingolipid biosynthetic process|	serine C-palmitoyltransferase activity|protein binding|	10	-1.4	17.5	-17.5	10	-1.2	17.6	-17.6	-1.2	34.5	7e-05	-1.9	-0.8	0.0101032	1	1	0
ENSMUSG00000030447	CYFIP1	cytoplasmic FMR1 interacting protein 1	ruffle|mRNA cap binding complex|lamellipodium|cell junction|SCAR complex|neuron projection|synapse|perinuclear region of cytoplasm|extracellular vesicular exosome|	regulation of cell shape|Rac protein signal transduction|lamellipodium assembly|ruffle organization|axon extension|cognition|positive regulation of Arp2/3 complex-mediated actin nucleation|	protein binding|protein complex binding|protein complex binding|Rac GTPase binding|Rac GTPase binding|actin filament binding|	10	-1.2	23.6	-23.6	10	-1.2	11.4	-11.4	-1.2	34.5	7e-05	-2	-0.8	0.0101032	1	1	0
ENSMUSG00000024182	AXIN1	axin 1	nucleus|cytoplasm|Golgi apparatus|cytosol|cytoplasmic microtubule|cell cortex|postsynaptic density|cytoplasmic membrane-bounded vesicle|lateral plasma membrane|beta-catenin destruction complex|cytoplasmic vesicle|perinuclear region of cytoplasm|cell periphery|	protein polyubiquitination|in utero embryonic development|optic placode formation|positive regulation of protein phosphorylation|nucleocytoplasmic transport|apoptotic process|activation of JUN kinase activity|determination of left/right symmetry|sensory perception of sound|cell death|dorsal/ventral axis specification|positive regulation of peptidyl-threonine phosphorylation|forebrain anterior/pos…	signal transducer activity|GTPase activator activity|receptor binding|protein binding|beta-catenin binding|protein C-terminus binding|enzyme binding|protein kinase binding|protein kinase binding|ubiquitin protein ligase binding|protein complex scaffold|protein complex scaffold|identical protein binding|protein homodimerization activity|protein self-association|SMAD binding|armadillo repeat domain…	9	2.1	28.4	28.4	9	1.4	7.79	7.79	2	34.4	7e-05	1.1	3.5	0.0101032	1	1	0
ENSMUSG00000006412	PFDN2	prefoldin subunit 2	nucleus|nucleolus|cytoplasm|mitochondrion|Golgi apparatus|prefoldin complex|extracellular vesicular exosome|	protein folding|protein folding|cellular protein metabolic process|'de novo' posttranslational protein folding|	protein binding|unfolded protein binding|	8	1.4	15.8	15.8	8	2.2	21.5	21.5	2	34.3	7e-05	1.1	2.9	0.0101032	1	1	0
ENSMUSG00000035472	SLC25A21	solute carrier family 25 (mitochondrial oxoadipate carrier), member 21	mitochondrial inner membrane|integral component of membrane|	lysine catabolic process|cellular nitrogen compound metabolic process|small molecule metabolic process|transmembrane transport|	None	10	1.2	16.4	16.4	10	1.4	18.5	18.5	1.3	34.3	7e-05	1	2.1	0.0101032	1	1	0
ENSMUSG00000026750	PSMB7	proteasome (prosome, macropain) subunit, beta type, 7	proteasome complex|nucleus|nucleoplasm|cytosol|proteasome core complex|microtubule cytoskeleton|extracellular vesicular exosome|	G1/S transition of mitotic cell cycle|protein polyubiquitination|mitotic cell cycle|antigen processing and presentation of peptide antigen via MHC class I|antigen processing and presentation of exogenous peptide antigen via MHC class I, TAP-dependent|regulation of cellular amino acid metabolic process|apoptotic process|DNA damage response, signal transduction by p53 class mediator resulting in ce…	threonine-type endopeptidase activity|protein binding|	5	1	19.3	19.3	4	1.7	18.3	18.3	1.6	34.3	7e-05	1	2.6	0.0101032	1	1	0
ENSMUSG00000075486	COMMD6	COMM domain containing 6	nucleus|cytoplasm|	negative regulation of NF-kappaB transcription factor activity|	protein binding|NF-kappaB binding|	8	-0.9	25.9	-25.9	8	-1	8.76	-8.76	-0.9	34.2	7e-05	-1.4	-0.7	0.0101032	1	1	0
ENSMUSG00000021258	CCNK	cyclin K	cyclin K-CDK12 complex|cyclin K-CDK13 complex|nucleus|	regulation of cyclin-dependent protein serine/threonine kinase activity|in utero embryonic development|regulation of transcription, DNA-templated|transcription from RNA polymerase II promoter|protein phosphorylation|cellular response to DNA damage stimulus|mitotic nuclear division|negative regulation of cell cycle arrest|	cyclin-dependent protein serine/threonine kinase activity|protein binding|RNA polymerase II carboxy-terminal domain kinase activity|protein kinase binding|	8	1.5	19.8	19.8	6	1.7	14.7	14.7	1.5	33.9	7e-05	1.2	2.5	0.0101032	1	1	0
ENSMUSG00000053754	CHD8	chromodomain helicase DNA binding protein 8	nucleus|protein complex|MLL1 complex|	in utero embryonic development|ATP catabolic process|transcription, DNA-templated|negative regulation of Wnt signaling pathway|DNA duplex unwinding|ATP-dependent chromatin remodeling|negative regulation of transcription, DNA-templated|positive regulation of transcription, DNA-templated|positive regulation of transcription from RNA polymerase II promoter|positive regulation of transcription from R…	p53 binding|DNA binding|DNA helicase activity|protein binding|ATP binding|beta-catenin binding|DNA-dependent ATPase activity|methylated histone binding|histone binding|armadillo repeat domain binding|	8	1.2	17.4	17.4	7	1.2	16.8	16.8	1.2	33.8	7e-05	0.7	1.8	0.0101032	1	1	0
ENSMUSG00000039615	STUB1	STIP1 homology and U-box containing protein 1, E3 ubiquitin protein ligase	ubiquitin ligase complex|nucleus|cytoplasm|cytosol|plasma membrane|ubiquitin conjugating enzyme complex|nuclear inclusion body|intermediate filament cytoskeleton|extracellular vesicular exosome|	protein polyubiquitination|protein polyubiquitination|DNA repair|ubiquitin-dependent protein catabolic process|misfolded or incompletely synthesized protein catabolic process|transforming growth factor beta receptor signaling pathway|negative regulation of transforming growth factor beta receptor signaling pathway|ubiquitin-dependent SMAD protein catabolic process|positive regulation of protein u…	ubiquitin-protein transferase activity|ubiquitin-protein transferase activity|ubiquitin-protein transferase activity|protein binding|ligase activity|enzyme binding|kinase binding|Hsp70 protein binding|protein binding, bridging|TPR domain binding|ubiquitin protein ligase binding|ubiquitin-ubiquitin ligase activity|protein homodimerization activity|SMAD binding|misfolded protein binding|Hsp90 prote…	10	-1.2	22.9	-22.9	10	-1.2	11.4	-11.4	-1.2	33.8	7e-05	-1.9	-0.8	0.0101032	1	1	0
ENSMUSG00000039168	DAP	death-associated protein	None	autophagy|apoptotic process|activation of cysteine-type endopeptidase activity involved in apoptotic process|negative regulation of autophagy|negative regulation of NF-kappaB transcription factor activity|cellular response to amino acid starvation|negative regulation of transcription, DNA-templated|apoptotic signaling pathway|	death domain binding|	10	-0.9	17.4	-17.4	10	-1.5	18.8	-18.8	-1	33.7	7e-05	-1.7	-0.7	0.0101032	1	1	0
ENSMUSG00000018796	ACSL1	acyl-CoA synthetase long-chain family member 1	mitochondrion|mitochondrial outer membrane|peroxisomal membrane|endoplasmic reticulum membrane|plasma membrane|membrane|integral component of membrane|	long-chain fatty acid metabolic process|response to nutrient|lipid biosynthetic process|response to organic cyclic compound|triglyceride biosynthetic process|adiponectin-activated signaling pathway|unsaturated fatty acid metabolic process|response to oleic acid|long-chain fatty-acyl-CoA biosynthetic process|alpha-linolenic acid metabolic process|xenobiotic catabolic process|response to drug|linol…	long-chain fatty acid-CoA ligase activity|long-chain fatty acid-CoA ligase activity|ATP binding|	10	-0.8	20.9	-20.9	10	-2	13.8	-13.8	-1.2	33.7	7e-05	-2.1	-0.7	0.0101032	1	1	0
ENSMUSG00000005716	PVALB	parvalbumin	nucleus|cytoplasm|axon|protein complex|extracellular vesicular exosome|	cytosolic calcium ion homeostasis|	calcium ion binding|protein homodimerization activity|protein heterodimerization activity|	10	-2	24.3	-24.3	10	-1.8	9.87	-9.87	-2	33.7	7e-05	-3.3	-1.3	0.0101032	1	1	0
ENSMUSG00000032312	CSK	c-src tyrosine kinase	cytoplasm|cytosol|plasma membrane|plasma membrane|cell-cell junction|membrane raft|extracellular vesicular exosome|	protein phosphorylation|epidermal growth factor receptor signaling pathway|brain development|blood coagulation|negative regulation of cell proliferation|negative regulation of low-density lipoprotein particle clearance|peptidyl-tyrosine phosphorylation|peptidyl-tyrosine phosphorylation|platelet activation|T cell costimulation|negative regulation of interleukin-6 production|negative regulation of …	protein tyrosine kinase activity|non-membrane spanning protein tyrosine kinase activity|protein binding|ATP binding|protein C-terminus binding|protein phosphatase binding|identical protein binding|proline-rich region binding|	8	-1.8	24.8	-24.8	8	-1.4	9.79	-9.79	-1.6	33.6	7e-05	-2.5	-0.8	0.0101032	1	1	0
ENSMUSG00000070934	RRAGA	Ras-related GTP binding A	nucleus|cytoplasm|lysosome|lysosomal membrane|Golgi apparatus|intracellular membrane-bounded organelle|	apoptotic process|cell death|modulation by virus of host morphology or physiology|positive regulation of TOR signaling|cellular protein localization|positive regulation of cytolysis|cellular response to amino acid stimulus|	protein binding|GTP binding|protein homodimerization activity|protein heterodimerization activity|phosphoprotein binding|	10	-1.1	30.4	-30.4	10	-0.7	3.95	-3.95	-1.1	33.6	7e-05	-1.8	-0.7	0.0101032	1	1	0
ENSMUSG00000079197	PSME2	proteasome (prosome, macropain) activator subunit 2 (PA28 beta)	proteasome complex|nucleoplasm|cytosol|proteasome activator complex|membrane|extracellular vesicular exosome|	G1/S transition of mitotic cell cycle|protein polyubiquitination|mitotic cell cycle|antigen processing and presentation of peptide antigen via MHC class I|antigen processing and presentation of exogenous peptide antigen via MHC class I, TAP-dependent|regulation of cellular amino acid metabolic process|apoptotic process|DNA damage response, signal transduction by p53 class mediator resulting in ce…	None	10	-1.9	29.7	-29.7	10	-0.9	6.34	-6.34	-1.2	33.2	7e-05	-2.4	-0.6	0.0101032	1	1	0
ENSMUSG00000014769	PSMB1	proteasome (prosome, macropain) subunit, beta type, 1	proteasome complex|nucleus|nucleoplasm|cytosol|proteasome core complex|extracellular vesicular exosome|	G1/S transition of mitotic cell cycle|protein polyubiquitination|mitotic cell cycle|antigen processing and presentation of peptide antigen via MHC class I|antigen processing and presentation of exogenous peptide antigen via MHC class I, TAP-dependent|regulation of cellular amino acid metabolic process|apoptotic process|DNA damage response, signal transduction by p53 class mediator resulting in ce…	threonine-type endopeptidase activity|protein binding|	8	0.9	20.3	20.3	7	0.8	13.2	13.2	0.9	33.1	7e-05	0.6	1.4	0.0101032	1	1	0
ENSMUSG00000021987	MTMR6	myotubularin related protein 6	nuclear envelope|cytoplasm|cytosol|	protein dephosphorylation|phospholipid metabolic process|phosphatidylinositol biosynthetic process|peptidyl-tyrosine dephosphorylation|peptidyl-tyrosine dephosphorylation|small molecule metabolic process|potassium ion transmembrane transport|	protein serine/threonine phosphatase activity|protein tyrosine phosphatase activity|calcium-activated potassium channel activity|	10	-0.9	23.4	-23.4	10	-0.8	10.1	-10.1	-0.9	33	7e-05	-1.3	-0.6	0.0101032	1	1	0
ENSMUSG00000008450	NUTF2	nuclear transport factor 2	nuclear pore|cytosol|extracellular vesicular exosome|	protein export from nucleus|	transporter activity|protein binding|	6	2.3	26.7	26.7	5	1.8	7.3	7.3	2.3	33	7e-05	1.8	3.9	0.0101032	1	1	0
ENSMUSG00000028431	IKBKAP	inhibitor of kappa light polypeptide gene enhancer in B-cells, kinase complex-associated protein	nucleolus|cytoplasm|transcription elongation factor complex|DNA-directed RNA polymerase II, holoenzyme|Elongator holoenzyme complex|	chromatin organization|regulation of transcription from RNA polymerase II promoter|regulation of transcription from RNA polymerase II promoter|transcription elongation from RNA polymerase II promoter|protein complex assembly|protein phosphorylation|immune response|signal transduction|positive regulation of cell migration|regulation of protein kinase activity|regulation of protein kinase activity|	DNA binding|signal transducer activity|protein binding|phosphorylase kinase regulator activity|	10	1.1	27.5	27.5	10	0.8	6.55	6.55	1	32.9	8e-05	0.7	1.5	0.00987711	1	1	1
ENSMUSG00000094727	GM2825	predicted gene 2825	cellular_component|	biological_process|	molecular_function|	8	1.3	16.7	16.7	7	1.3	16.5	16.5	1.3	32.8	8e-05	1	2.1	0.00987711	1	1	1
ENSMUSG00000031207	MSN	moesin	uropod|extracellular space|cytoplasm|cytoskeleton|plasma membrane|microvillus|focal adhesion|basolateral plasma membrane|apical plasma membrane|extrinsic component of membrane|filopodium|microvillus membrane|apical part of cell|extracellular vesicular exosome|blood microparticle|	cellular component movement|leukocyte cell-cell adhesion|positive regulation of gene expression|membrane to membrane docking|leukocyte migration|establishment of endothelial barrier|regulation of lymphocyte migration|	double-stranded RNA binding|actin binding|receptor binding|structural constituent of cytoskeleton|protein binding|protein kinase binding|cell adhesion molecule binding|	10	0.6	20.9	20.9	10	1.6	13.9	13.9	0.6	32.6	8e-05	0.4	1.3	0.00987711	1	1	1
ENSMUSG00000041236	VPS41	vacuolar protein sorting 41 homolog (S. cerevisiae)	lysosomal membrane|early endosome|late endosome|Golgi-associated vesicle|cytosol|microtubule|membrane|HOPS complex|	intracellular protein transport|biological_process|vesicle-mediated transport|Golgi vesicle transport|	molecular_function|protein binding|microtubule binding|zinc ion binding|	9	-0.9	20.1	-20.1	8	-1.6	14.3	-14.3	-0.9	32.5	9e-05	-1.8	-0.7	0.0109145	1	1	0
ENSMUSG00000020346	MGAT1	mannosyl (alpha-1,3-)-glycoprotein beta-1,2-N-acetylglucosaminyltransferase	Golgi membrane|membrane|integral component of membrane|extracellular vesicular exosome|	in utero embryonic development|carbohydrate metabolic process|UDP-N-acetylglucosamine catabolic process|protein glycosylation|protein N-linked glycosylation via asparagine|post-translational protein modification|cellular protein metabolic process|	alpha-1,3-mannosylglycoprotein 2-beta-N-acetylglucosaminyltransferase activity|acetylglucosaminyltransferase activity|metal ion binding|	9	-0.9	23.5	-23.5	9	-0.9	9.44	-9.44	-0.9	32.5	9e-05	-1.7	-0.6	0.0109145	1	1	0
ENSMUSG00000098650	RP23-242C19.7	N/A	None	None	None	10	-0.9	25.7	-25.7	10	-1.3	8.04	-8.04	-1	32.5	9e-05	-1.5	-0.7	0.0109145	1	1	0
ENSMUSG00000009030	PDCL	phosducin-like	cytoplasm|	protein folding|signal transduction|visual perception|regulation of G-protein coupled receptor protein signaling pathway|intracellular signal transduction|negative regulation of protein refolding|	receptor signaling protein activity|protein complex binding|	10	1.3	9.37	9.37	10	1.3	23.5	23.5	1.3	32.4	9e-05	0.9	2	0.0109145	1	1	0
ENSMUSG00000026176	CTDSP1	CTD (carboxy-terminal domain, RNA polymerase II, polypeptide A) small phosphatase 1	nucleus|nucleus|extracellular vesicular exosome|	regulation of transcription from RNA polymerase II promoter|protein dephosphorylation|negative regulation of neuron differentiation|negative regulation of neurogenesis|	protein binding|CTD phosphatase activity|metal ion binding|	10	1.1	20.5	20.5	9	1	12.3	12.3	1.1	32.4	9e-05	0.8	1.6	0.0109145	1	1	0
ENSMUSG00000033364	USP37	ubiquitin specific peptidase 37	nucleus|	G1/S transition of mitotic cell cycle|ubiquitin-dependent protein catabolic process|mitotic nuclear division|protein deubiquitination|protein K11-linked deubiquitination|protein K48-linked deubiquitination|	cysteine-type endopeptidase activity|ubiquitin-specific protease activity|protein binding|protein kinase binding|	8	2	26.5	26.5	7	0.8	10.9	10.9	1.9	32.3	9e-05	0.5	3	0.0109145	1	1	0
ENSMUSG00000025044	MSR1	macrophage scavenger receptor 1	collagen trimer|cytosol|plasma membrane|integral component of plasma membrane|endocytic vesicle membrane|low-density lipoprotein particle|	receptor-mediated endocytosis|positive regulation of macrophage derived foam cell differentiation|positive regulation of cholesterol storage|cholesterol transport|plasma lipoprotein particle clearance|lipoprotein transport|	scavenger receptor activity|protein binding|low-density lipoprotein particle binding|	10	-0.7	24.2	-24.2	10	-1	8.97	-8.97	-0.7	32.3	9e-05	-1.2	-0.5	0.0109145	1	1	0
ENSMUSG00000030036	MOGS	mannosyl-oligosaccharide glucosidase	endoplasmic reticulum|endoplasmic reticulum membrane|membrane|integral component of membrane|extracellular vesicular exosome|	protein folding|protein N-linked glycosylation|oligosaccharide metabolic process|protein N-linked glycosylation via asparagine|post-translational protein modification|cellular protein metabolic process|	mannosyl-oligosaccharide glucosidase activity|glucosidase activity|	10	-1.7	22.2	-22.2	10	-2	10.4	-10.4	-1.7	32	0.0001	-2.9	-1.1	0.0116449	1	1	0
ENSMUSG00000015747	VPS45	vacuolar protein sorting 45 homolog (S. cerevisiae)	Golgi membrane|cellular_component|Golgi apparatus|endosome membrane|integral component of membrane|	intracellular protein transport|vesicle docking involved in exocytosis|blood coagulation|	molecular_function|	10	-1.4	27.8	-27.8	10	-1	5.55	-5.55	-1.4	32	0.0001	-1.9	-0.8	0.0116449	1	1	0
ENSMUSG00000068314	GM6899	predicted gene 6899	cellular_component|	biological_process|	molecular_function|	10	-0.5	9.62	-9.62	10	-1.5	26.4	-26.4	-1	31.7	0.0001	-1.9	-0.7	0.0116449	1	1	0
ENSMUSG00000039253	FN3KRP	fructosamine 3 kinase related protein	None	phosphorylation|	kinase activity|	10	1.9	22.8	22.8	10	1.4	10	10	1.8	31.7	0.0001	1.2	2.8	0.0116449	1	1	0
ENSMUSG00000029467	ATP2A2	ATPase, Ca++ transporting, cardiac muscle, slow twitch 2	endoplasmic reticulum membrane|endoplasmic reticulum membrane|integral component of plasma membrane|membrane|sarcoplasmic reticulum|platelet dense tubular network membrane|sarcoplasmic reticulum membrane|intracellular membrane-bounded organelle|	regulation of the force of heart contraction|transport|cellular calcium ion homeostasis|ER-nucleus signaling pathway|cell adhesion|blood coagulation|metabolic process|epidermis development|positive regulation of heart rate|ion transmembrane transport|negative regulation of heart contraction|transmembrane transport|relaxation of cardiac muscle|sarcoplasmic reticulum calcium ion transport|calcium i…	calcium-transporting ATPase activity|protein binding|ATP binding|protein C-terminus binding|enzyme binding|S100 protein binding|metal ion binding|calcium-transporting ATPase activity involved in regulation of cardiac muscle cell membrane potential|	10	-0.9	23.2	-23.2	10	-0.7	9.13	-9.13	-0.9	31.7	0.0001	-1.4	-0.5	0.0116449	1	1	0
ENSMUSG00000026229	PSMD1	proteasome (prosome, macropain) 26S subunit, non-ATPase, 1	proteasome complex|nucleoplasm|cytosol|proteasome regulatory particle|membrane|proteasome accessory complex|extracellular vesicular exosome|	G1/S transition of mitotic cell cycle|protein polyubiquitination|mitotic cell cycle|antigen processing and presentation of peptide antigen via MHC class I|antigen processing and presentation of exogenous peptide antigen via MHC class I, TAP-dependent|regulation of cellular amino acid metabolic process|apoptotic process|DNA damage response, signal transduction by p53 class mediator resulting in ce…	enzyme regulator activity|	9	1	25.1	25.1	9	1.2	7.38	7.38	1.1	31.7	0.0001	0.7	1.6	0.0116449	1	1	0
ENSMUSG00000074486	BGLAP2	bone gamma-carboxyglutamate protein 2	extracellular region|extracellular space|extracellular space|cytoplasm|rough endoplasmic reticulum|Golgi apparatus|dendrite|membrane-bounded vesicle|cell projection|perikaryon|	regulation of bone mineralization|pancreas development|biomineral tissue development|positive regulation of insulin secretion|cellular response to insulin stimulus|cellular response to insulin stimulus|glucose homeostasis|cellular lipid catabolic process|type B pancreatic cell proliferation|	calcium ion binding|structural constituent of bone|hydroxyapatite binding|metal ion binding|	10	1.3	12.2	12.2	10	2	21.8	21.8	1.7	31.6	0.0001	0.9	3.2	0.0116449	1	1	0
ENSMUSG00000020032	NUAK1	NUAK family, SNF1-like kinase, 1	nucleus|nucleolus|cytoplasm|microtubule cytoskeleton|	protein phosphorylation|cellular response to DNA damage stimulus|cell adhesion|regulation of cell adhesion|regulation of myosin-light-chain-phosphatase activity|regulation of cell proliferation|regulation of cellular senescence|	p53 binding|protein serine/threonine kinase activity|protein binding|ATP binding|metal ion binding|	10	-0.8	11.5	-11.5	9	-1.5	23.6	-23.6	-1.1	31.5	0.00011	-1.9	-0.7	0.0123194	1	1	0
ENSMUSG00000029020	MFN2	mitofusin 2	mitochondrion|mitochondrial outer membrane|cytosol|microtubule cytoskeleton|integral component of membrane|intrinsic component of mitochondrial outer membrane|	blastocyst formation|GTP catabolic process|protein targeting to mitochondrion|mitochondrial membrane organization|blood coagulation|mitochondrial fusion|mitochondrial fusion|mitochondrial fusion|cell death|negative regulation of Ras protein signal transduction|camera-type eye morphogenesis|negative regulation of smooth muscle cell proliferation|mitochondrion localization|	GTPase activity|protein binding|GTP binding|ubiquitin protein ligase binding|	10	0.7	20.3	20.3	9	0.8	11.7	11.7	0.8	31.4	0.00011	0.5	1.2	0.0123194	1	1	0
ENSMUSG00000021998	LCP1	lymphocyte cytosolic protein 1 (L-plastin)	stress fiber|ruffle|phagocytic cup|extracellular space|cytoplasm|cytoplasm|cytosol|actin filament|plasma membrane|focal adhesion|actin cytoskeleton|filopodium|actin filament bundle|ruffle membrane|extracellular vesicular exosome|	T cell activation involved in immune response|protein kinase A signaling|cell migration|organ regeneration|regulation of intracellular protein transport|actin filament bundle assembly|	actin binding|calcium ion binding|identical protein binding|actin filament binding|	10	1	22.6	22.6	9	1	9.2	9.2	1	31.4	0.00011	0.7	1.4	0.0123194	1	1	0
ENSMUSG00000048154	KMT2D	lysine (K)-specific methyltransferase 2D	nucleus|histone methyltransferase complex|	oocyte growth|in utero embryonic development|chromatin silencing|transcription, DNA-templated|regulation of transcription, DNA-templated|positive regulation of cell proliferation|positive regulation of intracellular estrogen receptor signaling pathway|response to estrogen|positive regulation of transcription from RNA polymerase II promoter|oogenesis|histone H3-K4 methylation|	DNA binding|protein binding|zinc ion binding|histone-lysine N-methyltransferase activity|transcription regulatory region DNA binding|	10	-0.8	24.3	-24.3	10	-0.8	7.36	-7.36	-0.8	31.3	0.00011	-1.7	-0.6	0.0123194	1	1	0
ENSMUSG00000096036	GM21778	N/A	None	None	None	10	-1.9	26.4	-26.4	10	-1.1	7.33	-7.33	-1.7	31.3	0.00011	-2.6	-0.4	0.0123194	1	1	0
ENSMUSG00000039621	PREX1	phosphatidylinositol-3,4,5-trisphosphate-dependent Rac exchange factor 1	cytoplasm|cytosol|plasma membrane|growth cone|dendritic shaft|intracellular membrane-bounded organelle|perinuclear region of cytoplasm|	superoxide metabolic process|actin filament polymerization|regulation of actin filament polymerization|positive regulation of Rho GTPase activity|positive regulation of Rho GTPase activity|intracellular signal transduction|neutrophil activation|regulation of dendrite development|	Rho guanyl-nucleotide exchange factor activity|Rho GTPase activator activity|protein binding|phospholipid binding|enzyme binding|	10	1.5	15.8	15.8	10	1.2	16.2	16.2	1.3	31.2	0.00011	0.6	1.9	0.0123194	1	1	0
ENSMUSG00000027454	GINS1	GINS complex subunit 1 (Psf1 homolog)	nucleus|nucleoplasm|cytoplasm|	mitotic cell cycle|inner cell mass cell proliferation|DNA strand elongation involved in DNA replication|	None	9	1.6	20.2	20.2	9	1.2	12.4	12.4	1.4	31.2	0.00011	1	2.3	0.0123194	1	1	0
ENSMUSG00000066407	GM10263	40S ribosomal protein S28 pseudogene	None	None	None	7	1.4	9.37	9.37	7	2	23.7	23.7	1.8	31.1	0.00011	1.1	3.5	0.0123194	1	1	0
ENSMUSG00000026103	GLS	glutaminase	mitochondrion|mitochondrion|mitochondrial matrix|cytosol|	suckling behavior|regulation of respiratory gaseous exchange by neurological system process|glutamate biosynthetic process|glutamate biosynthetic process|glutamine catabolic process|glutamine catabolic process|synaptic transmission|neurotransmitter secretion|cellular amino acid biosynthetic process|glutamate secretion|cellular nitrogen compound metabolic process|small molecule metabolic process|p…	glutaminase activity|glutaminase activity|protein binding|	10	0.9	18.6	18.6	10	0.9	12.8	12.8	0.9	30.9	0.00011	0.6	1.3	0.0123194	1	1	0
ENSMUSG00000040940	ARHGEF1	Rho guanine nucleotide exchange factor (GEF) 1	cytoplasm|cytosol|plasma membrane|plasma membrane|	Rho protein signal transduction|cell proliferation|positive regulation of Rho GTPase activity|positive regulation of Rho GTPase activity|termination of G-protein coupled receptor signaling pathway|neurotrophin TRK receptor signaling pathway|regulation of axonogenesis|negative regulation of axonogenesis|	Rho guanyl-nucleotide exchange factor activity|GTPase activator activity|protein binding|poly(A) RNA binding|	10	0.7	22.1	22.1	10	0.7	9.11	9.11	0.7	30.8	0.00011	0.5	1.1	0.0123194	1	1	0
ENSMUSG00000022890	ATP5J	ATP synthase, H+ transporting, mitochondrial Fo complex, subunit F6	mitochondrial proton-transporting ATP synthase complex, coupling factor F(o)|mitochondrion|mitochondrial inner membrane|mitochondrial proton-transporting ATP synthase complex|	ATP catabolic process|substantia nigra development|respiratory electron transport chain|mitochondrial ATP synthesis coupled proton transport|mitochondrial ATP synthesis coupled proton transport|cellular metabolic process|small molecule metabolic process|	transporter activity|hydrogen ion transmembrane transporter activity|ATPase activity|transmembrane transporter activity|	9	1.1	18.5	18.5	8	1.4	13.5	13.5	1.3	30.7	0.00011	0.9	2.1	0.0123194	1	1	0
ENSMUSG00000026812	TSC1	tuberous sclerosis 1	cytoplasm|cytosol|cytosol|actin filament|cell cortex|membrane|lamellipodium|growth cone|TSC1-TSC2 complex|intracellular membrane-bounded organelle|protein complex|	kidney development|neural tube closure|regulation of cell-matrix adhesion|rRNA export from nucleus|regulation of translation|potassium ion transport|cell cycle arrest|cell-matrix adhesion|negative regulation of cell proliferation|insulin receptor signaling pathway|negative regulation of translation|hippocampus development|cerebral cortex development|cell projection organization|negative regulatio…	protein binding|GTPase regulator activity|GTPase activating protein binding|protein N-terminus binding|chaperone binding|	10	-1.5	32.3	-32.3	10	-0.5	1.87	-1.87	-1.5	30.7	0.00011	-2.3	-0.9	0.0123194	1	1	0
ENSMUSG00000002102	PSMC3	proteasome (prosome, macropain) 26S subunit, ATPase, 3	proteasome complex|cytoplasmic mRNA processing body|nucleus|nucleoplasm|cytosol|membrane|proteasome accessory complex|perinuclear region of cytoplasm|	G1/S transition of mitotic cell cycle|protein polyubiquitination|mitotic cell cycle|blastocyst development|antigen processing and presentation of peptide antigen via MHC class I|antigen processing and presentation of exogenous peptide antigen via MHC class I, TAP-dependent|ATP catabolic process|regulation of cellular amino acid metabolic process|apoptotic process|DNA damage response, signal trans…	transcription coactivator activity|transcription corepressor activity|protein binding|ATP binding|ATPase activity|	8	1.3	23.8	23.8	8	1.6	8.02	8.02	1.4	30.6	0.00011	1	2.3	0.0123194	1	1	0
ENSMUSG00000035078	MTMR9	myotubularin related protein 9	cytoplasm|	dephosphorylation|regulation of catalytic activity|	protein binding|phosphatase activity|enzyme regulator activity|	10	-0.8	18.8	-18.8	10	-1.1	12.9	-12.9	-0.9	30.4	0.00011	-1.4	-0.6	0.0123194	1	1	0
ENSMUSG00000018654	IKZF1	IKAROS family zinc finger 1 (Ikaros)	nucleus|centromeric heterochromatin|cytoplasm|	negative regulation of transcription from RNA polymerase II promoter|natural killer cell differentiation|transcription, DNA-templated|cell cycle|mesoderm development|chromatin modification|B cell differentiation|T cell differentiation|forebrain development|positive regulation of multicellular organism growth|positive regulation of neutrophil differentiation|positive regulation of transcription fr…	DNA binding|sequence-specific DNA binding transcription factor activity|sequence-specific DNA binding|metal ion binding|protein heterodimerization activity|	9	-1.6	22.7	-22.7	9	-1	8.47	-8.47	-1.4	30.3	0.00011	-2	-0.5	0.0123194	1	1	0
ENSMUSG00000021918	NEK4	NIMA-related kinase 4	nucleus|	protein phosphorylation|mitotic nuclear division|signal transduction by phosphorylation|	protein serine/threonine kinase activity|ATP binding|metal ion binding|	10	1.9	26.2	26.2	10	1.4	5.42	5.42	1.9	30.3	0.00011	1.3	3	0.0123194	1	1	0
ENSMUSG00000028032	PAPSS1	3'-phosphoadenosine 5'-phosphosulfate synthase 1	cytosol|	sulfate assimilation|skeletal system development|carbohydrate metabolic process|xenobiotic metabolic process|phosphorylation|glycosaminoglycan metabolic process|small molecule metabolic process|3'-phosphoadenosine 5'-phosphosulfate metabolic process|3'-phosphoadenosine 5'-phosphosulfate biosynthetic process|	adenylylsulfate kinase activity|sulfate adenylyltransferase (ATP) activity|ATP binding|nucleotidyltransferase activity|	10	-0.9	14.6	-14.6	10	-1.3	16.3	-16.3	-1.2	30.2	0.00011	-1.8	-0.8	0.0123194	1	1	0
ENSMUSG00000039501	ZNFX1	zinc finger, NFX1-type containing 1	None	None	poly(A) RNA binding|metal ion binding|	10	1.9	20.5	20.5	10	2.4	10.7	10.7	2.2	30.2	0.00011	1.6	4.4	0.0123194	1	1	0
ENSMUSG00000021420	FARS2	phenylalanyl-tRNA synthetase 2, mitochondrial	mitochondrial matrix|	tRNA aminoacylation for protein translation|phenylalanyl-tRNA aminoacylation|tRNA processing|gene expression|	tRNA binding|magnesium ion binding|phenylalanine-tRNA ligase activity|ATP binding|	9	1.1	24.2	24.2	9	1	6.34	6.34	1.1	30.1	0.00011	0.7	1.6	0.0123194	1	1	0
ENSMUSG00000055681	COPE	coatomer protein complex, subunit epsilon	nucleus|Golgi apparatus|cytosol|COPI vesicle coat|	retrograde vesicle-mediated transport, Golgi to ER|intra-Golgi vesicle-mediated transport|protein transport|COPI coating of Golgi vesicle|membrane organization|	structural molecule activity|	9	-1	23.8	-23.8	9	-0.7	7.45	-7.45	-0.9	30	0.00011	-1.4	-0.6	0.0123194	1	1	0
ENSMUSG00000078580	E430018J23RIK	RIKEN cDNA E430018J23 gene	cellular_component|	biological_process|	molecular_function|metal ion binding|	10	-1.9	25.9	-25.9	10	-1.1	6.31	-6.31	-1.8	30	0.00011	-2.6	-0.5	0.0123194	1	1	0
ENSMUSG00000061755	BOD1L	biorientation of chromosomes in cell division 1-like	nucleus|	biological_process|	molecular_function|	10	1.7	14.2	14.2	10	1.6	16.2	16.2	1.7	29.9	0.00013	1.2	2.6	0.0130605	1	1	0
ENSMUSG00000044702	PALB2	partner and localizer of BRCA2	nucleus|nucleoplasm|	double-strand break repair via homologous recombination|somitogenesis|inner cell mass cell proliferation|DNA repair|mesoderm development|organ morphogenesis|post-anal tail morphogenesis|negative regulation of apoptotic process|	DNA binding|protein binding|	8	1.8	21.8	21.8	9	0.9	12.2	12.2	1.7	29.9	0.00013	0.4	2.4	0.0130605	1	1	0
ENSMUSG00000074483	BGLAP	bone gamma-carboxyglutamate (gla) protein	extracellular region|extracellular space|rough endoplasmic reticulum|Golgi apparatus|dendrite|membrane-bounded vesicle|perikaryon|	skeletal system development|osteoblast differentiation|osteoblast development|cell adhesion|cell aging|response to mechanical stimulus|response to gravity|response to zinc ion|response to activity|bone mineralization|regulation of bone mineralization|response to vitamin K|response to vitamin D|response to testosterone|response to hydroxyisoflavone|odontogenesis|response to drug|response to estrog…	structural molecule activity|calcium ion binding|structural constituent of bone|hydroxyapatite binding|	10	1.3	9.96	9.96	10	2	21.9	21.9	1.7	29.8	0.00014	0.9	3.3	0.0139286	1	1	0
ENSMUSG00000016528	MAPKAPK2	mitogen-activated protein kinase-activated protein kinase 2	nucleus|nucleoplasm|cytoplasm|centrosome|cytosol|	MAPK cascade|activation of MAPK activity|toll-like receptor signaling pathway|toll-like receptor signaling pathway|MyD88-dependent toll-like receptor signaling pathway|MyD88-independent toll-like receptor signaling pathway|protein phosphorylation|leukotriene metabolic process|response to stress|inflammatory response|cellular response to DNA damage stimulus|Ras protein signal transduction|gene exp…	protein kinase activity|protein serine/threonine kinase activity|signal transducer activity|protein binding|ATP binding|	10	-0.9	26	-26	10	-1.6	6.5	-6.5	-1.1	29.8	0.00014	-1.8	-0.7	0.0139286	1	1	0
ENSMUSG00000058655	EIF4B	eukaryotic translation initiation factor 4B	cytosol|eukaryotic translation initiation factor 4F complex|	nuclear-transcribed mRNA catabolic process, deadenylation-dependent decay|nuclear-transcribed mRNA poly(A) tail shortening|translation|translational initiation|regulation of translational initiation|insulin receptor signaling pathway|gene expression|RNA metabolic process|mRNA metabolic process|cellular protein metabolic process|	nucleotide binding|RNA binding|translation initiation factor activity|protein binding|poly(A) RNA binding|	10	0.6	18.2	18.2	9	0.6	11.9	11.9	0.6	29.7	0.00014	0.4	0.9	0.0139286	1	1	0
ENSMUSG00000020790	ANKFY1	ankyrin repeat and FYVE domain containing 1	lysosomal membrane|endosome membrane|membrane|extracellular vesicular exosome|	biological_process|	protein binding|metal ion binding|	10	-1	18.7	-18.7	10	-1.3	11.7	-11.7	-1.1	29.6	0.00014	-1.7	-0.8	0.0139286	1	1	0
ENSMUSG00000036315	ZNRD1	zinc ribbon domain containing 1	DNA-directed RNA polymerase I complex|	nucleobase-containing compound metabolic process|termination of RNA polymerase I transcription|	RNA polymerase I activity|nucleic acid binding|zinc ion binding|	9	1	11.8	11.8	9	1.1	18.3	18.3	1.1	29.5	0.00015	0.8	1.6	0.0146393	1	1	0
ENSMUSG00000024446	RPP21	ribonuclease P/MRP 21kDa subunit	nucleolus|	tRNA processing|response to drug|RNA phosphodiester bond hydrolysis, endonucleolytic|	ribonuclease P activity|metal ion binding|	9	2.5	29.9	29.9	9	0.7	3.43	3.43	2.5	29.5	0.00015	1.4	4.8	0.0146393	1	1	0
ENSMUSG00000021468	SPTLC1	serine palmitoyltransferase, long chain base subunit 1	endoplasmic reticulum membrane|integral component of membrane|serine C-palmitoyltransferase complex|SPOTS complex|	sphingolipid metabolic process|sphingomyelin biosynthetic process|sphingolipid biosynthetic process|small molecule metabolic process|sphinganine biosynthetic process|sphingosine biosynthetic process|ceramide biosynthetic process|	serine C-palmitoyltransferase activity|protein binding|pyridoxal phosphate binding|	10	-0.8	20.1	-20.1	10	-1	10.5	-10.5	-0.9	29.4	0.00015	-1.3	-0.6	0.0146393	1	1	0
ENSMUSG00000049691	NKX3-2	NK3 homeobox 2	nucleus|	skeletal system development|regulation of transcription, DNA-templated|transcription from RNA polymerase II promoter|determination of left/right symmetry|pancreas development|negative regulation of chondrocyte differentiation|middle ear morphogenesis|negative regulation of apoptotic process|spleen development|organ formation|skeletal system morphogenesis|embryonic skeletal system development|inte…	sequence-specific DNA binding transcription factor activity|sequence-specific DNA binding|	10	-0.7	12.5	-12.5	10	-1.1	19.9	-19.9	-1	29.3	0.00017	-1.4	-0.6	0.0163575	1	1	0
ENSMUSG00000040904	GM21988	N/A	None	None	None	10	-0.8	18.2	-18.2	10	-1.1	12.4	-12.4	-0.9	29.3	0.00017	-1.5	-0.6	0.0163575	1	1	0
ENSMUSG00000093989	RNASEK	ribonuclease, RNase K	cellular_component|integral component of membrane|	rRNA transcription|RNA phosphodiester bond hydrolysis, endonucleolytic|RNA phosphodiester bond hydrolysis, endonucleolytic|	endoribonuclease activity|	10	-0.8	18.2	-18.2	10	-1.1	12.4	-12.4	-0.9	29.3	0.00017	-1.5	-0.6	0.0163575	1	1	0
ENSMUSG00000040345	ARHGAP9	Rho GTPase activating protein 9	cytosol|	small GTPase mediated signal transduction|positive regulation of GTPase activity|positive regulation of GTPase activity|regulation of small GTPase mediated signal transduction|	GTPase activator activity|phosphatidylinositol-3,4,5-trisphosphate binding|	10	-1.6	18.2	-18.2	10	-1	12.4	-12.4	-1	29.3	0.00017	-1.9	-0.7	0.0163575	1	1	0
ENSMUSG00000023000	DHH	desert hedgehog	extracellular space|plasma membrane|	proteolysis|cell-cell signaling|spermatid development|male sex determination|response to estradiol|Leydig cell differentiation|myelination|regulation of steroid biosynthetic process|	patched binding|calcium ion binding|protein binding|peptidase activity|zinc ion binding|	10	1	15.8	15.8	10	1.4	14.8	14.8	1	29.2	0.00017	0.7	1.8	0.0163575	1	1	0
ENSMUSG00000030587	2200002D01RIK	RIKEN cDNA 2200002D01 gene	nucleolus|	biological_process|	molecular_function|	10	-1.3	18	-18	10	-1.5	11.7	-11.7	-1.3	29.2	0.00017	-2	-0.9	0.0163575	1	1	0
ENSMUSG00000045962	WNK1	WNK lysine deficient protein kinase 1	cytoplasm|	positive regulation of systemic arterial blood pressure|protein phosphorylation|negative regulation of protein kinase activity|ion transport|negative regulation of phosphatase activity|peptidyl-threonine phosphorylation|intracellular signal transduction|intracellular signal transduction|neuron development|regulation of cellular process|negative regulation of pancreatic juice secretion|	protein serine/threonine kinase activity|protein serine/threonine kinase activity|protein kinase inhibitor activity|protein binding|ATP binding|chloride channel inhibitor activity|phosphatase binding|	9	-1.2	27.4	-27.4	9	-0.7	3.95	-3.95	-1.1	29.2	0.00017	-1.8	-0.7	0.0163575	1	1	0
ENSMUSG00000001755	COASY	CoA synthase	nucleus|cytoplasm|mitochondrial outer membrane|mitochondrial matrix|extracellular vesicular exosome|	vitamin metabolic process|water-soluble vitamin metabolic process|cell death|coenzyme biosynthetic process|coenzyme A biosynthetic process|coenzyme A biosynthetic process|coenzyme A biosynthetic process|pantothenate metabolic process|phosphorylation|small molecule metabolic process|	dephospho-CoA kinase activity|pantetheine-phosphate adenylyltransferase activity|protein binding|ATP binding|	10	1.6	17.3	17.3	10	1.5	12.2	12.2	1.6	29.1	0.00017	1	2.4	0.0163575	1	1	0
ENSMUSG00000028639	YBX1	Y box binding protein 1	nucleus|nucleoplasm|U12-type spliceosomal complex|cytoplasm|cytoplasmic stress granule|ribonucleoprotein complex|nuclear membrane|intracellular membrane-bounded organelle|extracellular vesicular exosome|CRD-mediated mRNA stability complex|histone pre-mRNA 3'end processing complex|	negative regulation of transcription from RNA polymerase II promoter|mRNA splicing, via spliceosome|in utero embryonic development|regulation of transcription, DNA-templated|transcription from RNA polymerase II promoter|RNA splicing|gene expression|negative regulation of striated muscle cell differentiation|positive regulation of cell division|CRD-mediated mRNA stabilization|	DNA binding|DNA binding|double-stranded DNA binding|single-stranded DNA binding|sequence-specific DNA binding transcription factor activity|RNA binding|protein binding|poly(A) RNA binding|	10	-1.1	23.7	-23.7	9	-1	5.88	-5.88	-1.1	29.1	0.00017	-1.6	-0.8	0.0163575	1	1	0
ENSMUSG00000019210	ATP6V1E1	ATPase, H+ transporting, lysosomal 31kDa, V1 subunit E1	mitochondrion|lysosomal membrane|endosome|cytosol|cytosol|microvillus|apical plasma membrane|proton-transporting two-sector ATPase complex|proton-transporting two-sector ATPase complex, catalytic domain|extracellular vesicular exosome|	cellular iron ion homeostasis|metabolic process|insulin receptor signaling pathway|ATP hydrolysis coupled proton transport|proton transport|transferrin transport|interaction with host|transmembrane transport|phagosome maturation|	protein binding|hydrogen-exporting ATPase activity, phosphorylative mechanism|proton-transporting ATPase activity, rotational mechanism|ATPase binding|	8	-1.1	23.2	-23.2	8	-1	6.37	-6.37	-1	29	0.00017	-1.6	-0.7	0.0163575	1	1	0
ENSMUSG00000020901	PIK3R5	phosphoinositide-3-kinase, regulatory subunit 5	nucleus|cytoplasm|cytosol|1-phosphatidylinositol-4-phosphate 3-kinase, class IB complex|membrane|	phospholipid metabolic process|phosphatidylinositol biosynthetic process|G-protein coupled receptor signaling pathway|blood coagulation|cell death|phosphatidylinositol 3-kinase signaling|platelet activation|positive regulation of MAP kinase activity|regulation of phosphatidylinositol 3-kinase activity|small molecule metabolic process|positive regulation of protein kinase B signaling|	G-protein beta/gamma-subunit complex binding|1-phosphatidylinositol-3-kinase regulator activity|	10	0.8	17.6	17.6	10	1	12.1	12.1	0.9	28.9	0.00017	0.5	1.3	0.0163575	1	1	0
ENSMUSG00000024454	HDAC3	histone deacetylase 3	histone deacetylase complex|nucleus|nucleus|nucleoplasm|cytoplasm|spindle microtubule|transcriptional repressor complex|	negative regulation of transcription from RNA polymerase II promoter|negative regulation of transcription from RNA polymerase II promoter|transcription, DNA-templated|protein deacetylation|Notch signaling pathway|regulation of mitotic cell cycle|chromatin modification|circadian regulation of gene expression|regulation of multicellular organism growth|negative regulation of apoptotic process|cellu…	chromatin binding|transcription corepressor activity|transcription corepressor activity|histone deacetylase activity|histone deacetylase activity|protein binding|transcription factor binding|transcription factor binding|enzyme binding|cyclin binding|chromatin DNA binding|NAD-dependent histone deacetylase activity (H3-K14 specific)|protein deacetylase activity|histone deacetylase binding|NAD-depen…	8	1	19.2	19.2	8	0.7	10.5	10.5	1	28.9	0.00017	0.7	1.5	0.0163575	1	1	0
ENSMUSG00000020056	CCDC53	coiled-coil domain containing 53	actin cytoskeleton|intracellular membrane-bounded organelle|WASH complex|	biological_process|	protein binding|	10	-1.4	21.9	-21.9	10	-1	8.1	-8.1	-1.3	28.9	0.00017	-1.9	-0.8	0.0163575	1	1	0
ENSMUSG00000019659	CCDC12	coiled-coil domain containing 12	None	None	protein binding|	10	-0.6	16	-16	10	-1.1	15	-15	-0.9	28.7	0.00017	-1.4	-0.5	0.0163575	1	1	0
ENSMUSG00000036057	PTPN23	protein tyrosine phosphatase, non-receptor type 23	nucleus|cytoplasm|endosome|early endosome|cytoplasmic membrane-bounded vesicle|ciliary basal body|extracellular vesicular exosome|	protein transport|regulation of cell migration|peptidyl-tyrosine dephosphorylation|ubiquitin-dependent protein catabolic process via the multivesicular body sorting pathway|cilium morphogenesis|	protein tyrosine phosphatase activity|protein binding|	8	2.3	22.7	22.7	8	1.3	8.79	8.79	2.2	28.7	0.00017	1.6	3.9	0.0163575	1	1	0
ENSMUSG00000028863	MEAF6	MYST/Esa1-associated factor 6	nucleus|nucleoplasm|nucleolus|cytoplasm|centrosome|NuA4 histone acetyltransferase complex|MOZ/MORF histone acetyltransferase complex|	chromatin organization|transcription, DNA-templated|regulation of transcription, DNA-templated|histone H2A acetylation|histone H4-K5 acetylation|histone H4-K8 acetylation|histone H4-K12 acetylation|histone H3-K14 acetylation|	protein binding|	10	-1.1	14	-14	10	-1.9	17.4	-17.4	-1.2	28.6	0.00017	-2.3	-0.8	0.0163575	1	1	0
ENSMUSG00000037148	ARHGAP10	Rho GTPase activating protein 10	cytosol|plasma membrane|perinuclear region of cytoplasm|	apoptotic process|cytoskeleton organization|small GTPase mediated signal transduction|positive regulation of Rho GTPase activity|regulation of apoptotic process|negative regulation of apoptotic process|regulation of small GTPase mediated signal transduction|	Rho GTPase activator activity|protein binding|	10	-0.8	20.7	-20.7	10	-0.9	8.51	-8.51	-0.8	28.6	0.00017	-1.3	-0.6	0.0163575	1	1	0
ENSMUSG00000024027	GLP1R	glucagon-like peptide 1 receptor	plasma membrane|integral component of membrane|	energy reserve metabolic process|G-protein coupled receptor signaling pathway|activation of adenylate cyclase activity|positive regulation of cytosolic calcium ion concentration|cAMP-mediated signaling|small molecule metabolic process|regulation of insulin secretion|cellular response to glucagon stimulus|	transmembrane signaling receptor activity|glucagon receptor activity|	10	-1.8	26.2	-26.2	9	-0.9	5.39	-5.39	-1.7	28.6	0.00017	-2.6	-0.5	0.0163575	1	1	0
ENSMUSG00000042729	WDR74	WD repeat domain 74	nucleus|nucleolus|	blastocyst formation|biological_process|RNA metabolic process|	molecular_function|	9	1	20.3	20.3	9	1.4	9.21	9.21	1.1	28.5	0.00017	0.7	1.8	0.0163575	1	1	0
ENSMUSG00000075703	EPT1	ethanolaminephosphotransferase 1 (CDP-ethanolamine-specific)	endoplasmic reticulum membrane|integral component of membrane|	phospholipid metabolic process|phosphatidylethanolamine biosynthetic process|phosphatidylethanolamine biosynthetic process|small molecule metabolic process|glycerophospholipid biosynthetic process|	ethanolaminephosphotransferase activity|metal ion binding|	10	-1	20.5	-20.5	10	-1	8.45	-8.45	-1	28.5	0.00017	-1.5	-0.6	0.0163575	1	1	0
ENSMUSG00000021302	GGPS1	geranylgeranyl diphosphate synthase 1	cytosol|	cholesterol biosynthetic process|isoprenoid metabolic process|geranyl diphosphate biosynthetic process|geranylgeranyl diphosphate biosynthetic process|small molecule metabolic process|farnesyl diphosphate biosynthetic process|	dimethylallyltranstransferase activity|farnesyltranstransferase activity|geranyltranstransferase activity|metal ion binding|	8	2	25.9	25.9	8	1.3	4.42	4.42	2	28.5	0.00017	1.2	3.7	0.0163575	1	1	0
ENSMUSG00000038335	TSR1	TSR1, 20S rRNA accumulation, homolog (S. cerevisiae)	nucleolus|	ribosome assembly|	poly(A) RNA binding|	4	1.2	19.1	19.1	4	1	9.98	9.98	1.2	28.4	0.00017	0.8	1.9	0.0163575	1	1	0
ENSMUSG00000076556	IGKV4-57	immunoglobulin kappa variable 4-57	None	None	None	9	1.3	17.7	17.7	9	1.3	11	11	1.3	28.3	0.00017	0.8	2	0.0163575	1	1	0
ENSMUSG00000004044	PTRF	polymerase I and transcript release factor	nucleus|nucleoplasm|cytoplasm|mitochondrion|endoplasmic reticulum|cytosol|plasma membrane|caveola|intracellular membrane-bounded organelle|protein complex|	regulation of transcription, DNA-templated|transcription from RNA polymerase I promoter|transcription initiation from RNA polymerase I promoter|termination of RNA polymerase I transcription|termination of RNA polymerase I transcription|gene expression|	protein binding|rRNA primary transcript binding|poly(A) RNA binding|	10	-1.7	23.7	-23.7	10	-0.9	7.69	-7.69	-1.1	28.3	0.00017	-2.2	-0.5	0.0163575	1	1	0
ENSMUSG00000096003	GM3500	predicted gene 3500	None	None	None	8	1.8	27.2	27.2	8	0.8	4.13	4.13	1.8	28.3	0.00017	0.7	2.7	0.0163575	1	1	0
ENSMUSG00000060126	TPT1	tumor protein, translationally-controlled 1	extracellular space|nucleus|nucleoplasm|cytoplasm|cytoplasm|multivesicular body|tubulin complex|	calcium ion transport|cellular calcium ion homeostasis|response to virus|stem cell maintenance|regulation of apoptotic process|negative regulation of apoptotic process|negative regulation of intrinsic apoptotic signaling pathway in response to DNA damage|negative regulation of ectoderm development|	calcium ion binding|protein binding|transcription factor binding|poly(A) RNA binding|	10	-0.8	13.2	-13.2	10	-1.2	15.7	-15.7	-1.1	28.2	0.00018	-1.5	-0.7	0.0155004	1	1	0
ENSMUSG00000042557	SIN3A	SIN3 transcription regulator family member A	kinetochore|nucleus|nucleus|nucleoplasm|transcription factor complex|cytoplasm|Sin3 complex|Sin3 complex|transcriptional repressor complex|intercellular bridge|	negative regulation of transcription from RNA polymerase II promoter|in utero embryonic development|activation of innate immune response|positive regulation of defense response to virus by host|DNA replication|transcription, DNA-templated|protein deacetylation|aging|blood coagulation|response to organonitrogen compound|positive regulation of G2/M transition of mitotic cell cycle|positive regulati…	transcription regulatory region sequence-specific DNA binding|RNA polymerase II activating transcription factor binding|RNA polymerase II repressing transcription factor binding|RNA polymerase II transcription corepressor activity|chromatin binding|sequence-specific DNA binding transcription factor activity|transcription corepressor activity|protein binding|protein complex binding|protein deacety…	10	-1.2	20.8	-20.8	10	-1.3	7.83	-7.83	-1.3	28.2	0.00018	-1.9	-0.8	0.0155004	1	1	0
ENSMUSG00000029578	WIPI2	WD repeat domain, phosphoinositide interacting 2	nucleus|cytoplasm|autophagic vacuole|cytosol|pre-autophagosomal structure membrane|protein complex|	autophagic vacuole assembly|	protein binding|phosphatidylinositol-3-phosphate binding|phosphatidylinositol-3,5-bisphosphate binding|	9	1.8	26.2	26.2	9	0.9	4.76	4.76	1.7	28.2	0.00018	1.1	2.7	0.0155004	1	1	0
ENSMUSG00000024970	AI846148	expressed sequence AI846148	cellular_component|	biological_process|	molecular_function|	10	-1.2	13.6	-13.6	10	-1.6	15.7	-15.7	-1.4	28.1	0.00018	-2.1	-0.9	0.0155004	1	1	0
ENSMUSG00000034807	COLGALT1	collagen beta(1-O)galactosyltransferase 1	endoplasmic reticulum lumen|endoplasmic reticulum lumen|membrane|	lipopolysaccharide biosynthetic process|extracellular matrix organization|	procollagen galactosyltransferase activity|	10	-0.6	14.6	-14.6	10	-1.4	15.9	-15.9	-0.9	28	0.00019	-1.6	-0.5	0.0160911	1	1	0
ENSMUSG00000013822	ELOF1	elongation factor 1 homolog (S. cerevisiae)	nucleus|	transcription, DNA-templated|regulation of transcription, DNA-templated|	metal ion binding|	10	1	24.7	24.7	10	0.5	6.43	6.43	0.9	28	0.00019	0.5	1.4	0.0160911	1	1	0
ENSMUSG00000027540	PTPN1	protein tyrosine phosphatase, non-receptor type 1	early endosome|endoplasmic reticulum|endoplasmic reticulum membrane|cytosol|plasma membrane|cytoplasmic vesicle|sorting endosome|	blood coagulation|insulin receptor signaling pathway|regulation of signal transduction|cytokine-mediated signaling pathway|regulation of endocytosis|platelet activation|negative regulation of vascular endothelial growth factor receptor signaling pathway|endoplasmic reticulum unfolded protein response|actin cytoskeleton reorganization|peptidyl-tyrosine dephosphorylation|peptidyl-tyrosine dephospho…	protein tyrosine phosphatase activity|protein tyrosine phosphatase activity|insulin receptor binding|protein binding|zinc ion binding|enzyme binding|protein kinase binding|receptor tyrosine kinase binding|poly(A) RNA binding|ephrin receptor binding|	7	0.8	15	15	7	1.7	16.7	16.7	1	27.9	0.00019	0.6	2.1	0.0160911	1	1	0
ENSMUSG00000030265	KRAS	Kirsten rat sarcoma viral oncogene homolog	mitochondrion|plasma membrane|membrane|membrane raft|	MAPK cascade|activation of MAPKK activity|positive regulation of protein phosphorylation|GTP catabolic process|epidermal growth factor receptor signaling pathway|small GTPase mediated signal transduction|Ras protein signal transduction|axon guidance|blood coagulation|positive regulation of cell proliferation|insulin receptor signaling pathway|visual learning|fibroblast growth factor receptor sign…	protein binding|GTP binding|GMP binding|GDP binding|LRR domain binding|protein complex binding|	5	1.8	28	28	2	0.5	1.27	1.27	1.8	27.9	0.00019	1	3	0.0160911	1	1	0
ENSMUSG00000035960	APEX1	APEX nuclease (multifunctional DNA repair enzyme) 1	nucleus|nucleoplasm|nucleoplasm|transcription factor complex|nucleolus|cytoplasm|mitochondrion|endoplasmic reticulum|centrosome|ribosome|nuclear speck|perinuclear region of cytoplasm|	DNA catabolic process, endonucleolytic|DNA catabolic process, endonucleolytic|DNA catabolic process, endonucleolytic|DNA catabolic process, exonucleolytic|DNA repair|DNA repair|base-excision repair|base-excision repair|DNA recombination|transcription, DNA-templated|regulation of transcription, DNA-templated|aging|negative regulation of smooth muscle cell migration|response to drug|regulation of m…	DNA binding|damaged DNA binding|transcription coactivator activity|transcription corepressor activity|DNA-(apurinic or apyrimidinic site) lyase activity|DNA-(apurinic or apyrimidinic site) lyase activity|endonuclease activity|endodeoxyribonuclease activity|RNA-DNA hybrid ribonuclease activity|phosphodiesterase I activity|uracil DNA N-glycosylase activity|protein binding|phosphoric diester hydrola…	10	0.8	18.8	18.8	10	0.9	9.42	9.42	0.9	27.8	0.00019	0.6	1.4	0.0160911	1	1	0
ENSMUSG00000000094	TBX4	T-box 4	nucleus|	angiogenesis|morphogenesis of an epithelium|transcription, DNA-templated|regulation of transcription, DNA-templated|multicellular organismal development|lung development|embryonic limb morphogenesis|limb morphogenesis|skeletal system morphogenesis|	DNA binding|sequence-specific DNA binding transcription factor activity|	10	-1.9	22.8	-22.8	10	-1.7	5.51	-5.51	-1.8	27.8	0.00019	-3	-1.3	0.0160911	1	1	0
ENSMUSG00000037720	TMEM33	transmembrane protein 33	integral component of membrane|melanosome|extracellular vesicular exosome|	biological_process|	None	10	-1.9	24	-24	10	-1.8	4.26	-4.26	-1.9	27.8	0.00019	-3	-1.3	0.0160911	1	1	0
ENSMUSG00000003038	HMGN2	high mobility group nucleosomal binding domain 2	chromatin|nucleus|cytoplasm|	None	nucleosomal DNA binding|poly(A) RNA binding|	10	-0.9	14.5	-14.5	10	-1.4	16.4	-16.4	-1.1	27.7	0.0002	-1.9	-0.8	0.0164618	1	1	0
ENSMUSG00000025979	MOB4	MOB family member 4, phocein	cytoplasm|Golgi apparatus|Golgi cisterna membrane|perinuclear region of cytoplasm|	transport|	protein binding|kinase binding|metal ion binding|	10	-1.7	22	-22	10	-1.1	7.54	-7.54	-1.1	27.7	0.0002	-2.1	-0.8	0.0164618	1	1	0
ENSMUSG00000030435	U2AF2	U2 small nuclear RNA auxiliary factor 2	nucleus|nucleoplasm|spliceosomal complex|nuclear speck|	mRNA splicing, via spliceosome|mRNA splicing, via spliceosome|transcription from RNA polymerase II promoter|termination of RNA polymerase II transcription|mRNA processing|mRNA export from nucleus|RNA splicing|gene expression|mRNA 3'-end processing|negative regulation of mRNA splicing, via spliceosome|	nucleotide binding|protein binding|enzyme binding|poly(A) RNA binding|C2H2 zinc finger domain binding|	8	-1.8	26.1	-26.1	9	0.6	2.72	2.72	-1.8	27.7	0.0002	-3	-1.2	0.0164618	1	1	0
ENSMUSG00000067288	RPS28	ribosomal protein S28	cytoplasm|cytosol|small ribosomal subunit|cytosolic small ribosomal subunit|extracellular vesicular exosome|	nuclear-transcribed mRNA catabolic process, nonsense-mediated decay|rRNA processing|translation|translation|translational initiation|translational elongation|translational termination|SRP-dependent cotranslational protein targeting to membrane|gene expression|viral process|RNA metabolic process|mRNA metabolic process|viral life cycle|viral transcription|ribosomal small subunit biogenesis|cellular…	structural constituent of ribosome|poly(A) RNA binding|	7	1.4	5.79	5.79	7	2	23.4	23.4	1.9	27.6	0.00021	1.2	3.7	0.0170792	1	1	0
ENSMUSG00000028690	MMACHC	methylmalonic aciduria (cobalamin deficiency) cblC type, with homocystinuria	mitochondrion|cytosol|	vitamin metabolic process|water-soluble vitamin metabolic process|cobalamin metabolic process|cobalamin biosynthetic process|small molecule metabolic process|	cobalamin binding|	7	1.2	14.5	14.5	7	1.6	14.3	14.3	1.3	27.6	0.00021	0.9	2.3	0.0170792	1	1	0
ENSMUSG00000094273	GM10922	predicted gene 10922	cellular_component|	biological_process|	molecular_function|	8	1.3	14.8	14.8	7	1.3	13.2	13.2	1.3	27.6	0.00021	1	2.3	0.0170792	1	1	0
ENSMUSG00000094876	GM14345	predicted gene 14345	cellular_component|	biological_process|	molecular_function|	8	1.3	14.8	14.8	7	1.3	13.2	13.2	1.3	27.6	0.00021	1	2.3	0.0170792	1	1	0
ENSMUSG00000095229	GM2784	predicted gene 2784	cellular_component|	biological_process|	molecular_function|	8	1.3	14.8	14.8	7	1.3	13.2	13.2	1.3	27.6	0.00021	1	2.3	0.0170792	1	1	0
ENSMUSG00000027433	XRN2	5'-3' exoribonuclease 2	nucleus|nucleolus|membrane|aggresome|	DNA catabolic process, exonucleolytic|DNA-templated transcription, termination|regulation of transcription, DNA-templated|RNA processing|mRNA processing|RNA catabolic process|spermatogenesis|cell growth|RNA metabolic process|RNA phosphodiester bond hydrolysis, exonucleolytic|RNA phosphodiester bond hydrolysis, exonucleolytic|	nuclease activity|5'-3' exoribonuclease activity|zinc ion binding|5'-3' exonuclease activity|poly(A) RNA binding|	10	1.2	17.2	17.2	10	0.9	11.1	11.1	1.1	27.6	0.00021	0.7	1.7	0.0170792	1	1	0
ENSMUSG00000029713	GNB2	guanine nucleotide binding protein (G protein), beta polypeptide 2	extracellular space|lysosomal membrane|plasma membrane|membrane|protein complex|cell body|perinuclear region of cytoplasm|extracellular vesicular exosome|	energy reserve metabolic process|GTP catabolic process|G-protein coupled receptor signaling pathway|synaptic transmission|small molecule metabolic process|cellular response to glucagon stimulus|	GTPase activity|signal transducer activity|calcium channel regulator activity|protein binding|protein complex binding|GTPase binding|	10	1.6	20.4	20.4	10	1.1	8.4	8.4	1.4	27.6	0.00021	0.7	2.1	0.0170792	1	1	0
ENSMUSG00000030275	ETNK1	ethanolamine kinase 1	cytosol|membrane|	phospholipid metabolic process|phosphatidylethanolamine biosynthetic process|phosphatidylethanolamine biosynthetic process|phosphatidylethanolamine biosynthetic process|phosphorylation|small molecule metabolic process|glycerophospholipid biosynthetic process|	ethanolamine kinase activity|ATP binding|	10	-0.9	22.1	-22.1	10	-1	6.05	-6.05	-0.9	27.6	0.00021	-1.4	-0.6	0.0170792	1	1	0
ENSMUSG00000019178	STYXL1	serine/threonine/tyrosine interacting-like 1	None	protein dephosphorylation|intracellular signal transduction|	protein tyrosine/serine/threonine phosphatase activity|	10	-1.9	24.7	-24.7	10	-1.2	4.65	-4.65	-1.8	27.6	0.00021	-3	-1	0.0170792	1	1	0
ENSMUSG00000040415	DTX3	deltex 3, E3 ubiquitin ligase	cytoplasm|	Notch signaling pathway|protein ubiquitination|	zinc ion binding|ligase activity|	10	1.3	18.6	18.6	10	0.8	10.8	10.8	1.2	27.5	0.00022	0.8	1.7	0.0172755	1	1	0
ENSMUSG00000045236	KRTAP5-4	keratin associated protein 5-4	keratin filament|	None	None	10	0.6	18.6	18.6	10	1.3	10.6	10.6	0.7	27.5	0.00022	0.4	1.3	0.0172755	1	1	0
ENSMUSG00000030298	SEC13	SEC13 homolog (S. cerevisiae)	Golgi membrane|kinetochore|nuclear envelope|endoplasmic reticulum membrane|cytosol|ER to Golgi transport vesicle membrane|nuclear pore outer ring|nuclear pore outer ring|extracellular vesicular exosome|	mitotic cell cycle|antigen processing and presentation of peptide antigen via MHC class I|intracellular protein transport|ER to Golgi vesicle-mediated transport|protein N-linked glycosylation via asparagine|antigen processing and presentation of exogenous peptide antigen via MHC class II|post-translational protein modification|cellular protein metabolic process|COPII vesicle coating|mRNA transpor…	protein binding|	9	-1.7	27.1	-27.1	9	-0.7	5.03	-5.03	-1.6	27.5	0.00022	-2.6	-0.8	0.0172755	1	1	0
ENSMUSG00000025968	NDUFS1	NADH dehydrogenase (ubiquinone) Fe-S protein 1, 75kDa (NADH-coenzyme Q reductase)	mitochondrial inner membrane|mitochondrial respiratory chain complex I|mitochondrial respiratory chain complex I|mitochondrial respiratory chain complex I|mitochondrial intermembrane space|	mitochondrial electron transport, NADH to ubiquinone|apoptotic mitochondrial changes|respiratory electron transport chain|cellular metabolic process|small molecule metabolic process|cellular respiration|ATP metabolic process|regulation of mitochondrial membrane potential|reactive oxygen species metabolic process|	protein binding|NADH dehydrogenase (ubiquinone) activity|NADH dehydrogenase (ubiquinone) activity|electron carrier activity|metal ion binding|2 iron, 2 sulfur cluster binding|4 iron, 4 sulfur cluster binding|	9	1.9	25.5	25.5	6	0.8	4.95	4.95	1.8	27.5	0.00022	0.9	3	0.0172755	1	1	0
ENSMUSG00000029763	EXOC4	exocyst complex component 4	exocyst|cytoplasm|plasma membrane|membrane|growth cone membrane|myelin sheath abaxonal region|	vesicle docking involved in exocytosis|protein transport|cellular protein metabolic process|membrane organization|	protein binding|PDZ domain binding|protein N-terminus binding|	10	-1.9	29.9	-29.9	10	0.5	0.975	0.975	-1.9	27.5	0.00022	-3.4	-0.6	0.0172755	1	1	0
ENSMUSG00000025049	TAF5	TAF5 RNA polymerase II, TATA box binding protein (TBP)-associated factor, 100kDa	nucleus|nucleoplasm|transcription factor TFIID complex|actin cytoskeleton|transcription factor TFTC complex|intracellular membrane-bounded organelle|	DNA-templated transcription, initiation|regulation of transcription, DNA-templated|transcription from RNA polymerase II promoter|transcription initiation from RNA polymerase II promoter|transcription initiation from RNA polymerase II promoter|transcription elongation from RNA polymerase II promoter|gene expression|viral process|chromatin modification|histone acetylation|	sequence-specific DNA binding transcription factor activity|sequence-specific DNA binding transcription factor activity|histone acetyltransferase activity|protein binding|transcription regulatory region DNA binding|protein dimerization activity|	8	1.1	7.15	7.15	7	2	23	23	1.9	27.4	0.00024	0.8	3.5	0.0184917	1	1	0
ENSMUSG00000024742	FEN1	flap structure-specific endonuclease 1	nucleus|nucleoplasm|nucleolus|mitochondrion|membrane|	mitotic cell cycle|telomere maintenance via recombination|telomere maintenance|DNA catabolic process, endonucleolytic|DNA catabolic process, endonucleolytic|DNA catabolic process, endonucleolytic|DNA catabolic process, exonucleolytic|DNA replication|DNA strand elongation involved in DNA replication|DNA repair|DNA repair|base-excision repair|double-strand break repair|memory|UV protection|telomere…	magnesium ion binding|DNA binding|damaged DNA binding|double-stranded DNA binding|endonuclease activity|RNA-DNA hybrid ribonuclease activity|exonuclease activity|protein binding|double-stranded DNA exodeoxyribonuclease activity|5'-3' exonuclease activity|5'-flap endonuclease activity|5'-flap endonuclease activity|manganese ion binding|	10	1.1	12.1	12.1	10	1.5	16.6	16.6	1.2	27.4	0.00024	0.8	2.1	0.0184917	1	1	0
ENSMUSG00000025373	RNF41	ring finger protein 41, E3 ubiquitin protein ligase	cytosol|	protein polyubiquitination|negative regulation of cell proliferation|negative regulation of cell migration|regulation of MAPK cascade|regulation of lymphocyte differentiation|regulation of myeloid cell differentiation|protein autoubiquitination|regulation of protein kinase B signaling|extrinsic apoptotic signaling pathway|regulation of reactive oxygen species metabolic process|	ubiquitin-protein transferase activity|ubiquitin-protein transferase activity|erythropoietin receptor binding|interleukin-3 receptor binding|protein binding|zinc ion binding|acid-amino acid ligase activity|protein tag|	10	1.2	19	19	10	1.3	8.83	8.83	1.3	27.4	0.00024	0.8	2	0.0184917	1	1	0
ENSMUSG00000052962	MRPL35	mitochondrial ribosomal protein L35	mitochondrial ribosome|	translation|	structural constituent of ribosome|	10	1.1	12.7	12.7	10	1.3	15.4	15.4	1.2	27.3	0.00024	0.9	2	0.0184917	1	1	0
ENSMUSG00000048833	SLC39A9	solute carrier family 39, member 9	integral component of membrane|	zinc ion transport|transmembrane transport|	metal ion transmembrane transporter activity|	10	0.6	14	14	10	1	14.9	14.9	0.8	27.2	0.00027	0.5	1.3	0.020495	1	1	0
ENSMUSG00000078213	GM3750	predicted gene 3750	cellular_component|	biological_process|	molecular_function|	8	1.3	14.8	14.8	7	1.3	12.9	12.9	1.3	27.2	0.00027	1	2.3	0.020495	1	1	0
ENSMUSG00000078218	GM3706	predicted gene 3706	cellular_component|	biological_process|	molecular_function|	8	1.3	14.8	14.8	7	1.3	12.9	12.9	1.3	27.2	0.00027	1	2.3	0.020495	1	1	0
ENSMUSG00000049950	RPP38	ribonuclease P/MRP 38kDa subunit	nucleus|nucleolar ribonuclease P complex|	tRNA processing|RNA phosphodiester bond hydrolysis|RNA phosphodiester bond hydrolysis, endonucleolytic|RNA phosphodiester bond hydrolysis, endonucleolytic|	ribonuclease P activity|protein binding|	8	0.9	17.7	17.7	7	1.4	12.4	12.4	1.2	27.2	0.00027	0.8	2	0.020495	1	1	0
ENSMUSG00000035629	1700021K19RIK	RIKEN cDNA 1700021K19 gene	lysosome|endosome|early endosome|late endosome|	endocytosis|autophagy|negative regulation of autophagy|negative regulation of endocytosis|	molecular_function|	10	-0.8	18	-18	10	-1.1	9.88	-9.88	-0.9	27.2	0.00027	-1.5	-0.6	0.020495	1	1	0
ENSMUSG00000031858	MAU2	MAU2 sister chromatid cohesion factor	chromatin|nucleus|nucleoplasm|nucleoplasm|SMC loading complex|SMC loading complex|	mitotic cell cycle|maintenance of mitotic sister chromatid cohesion|	protein binding|protein N-terminus binding|	10	-0.9	21.4	-21.4	10	-1.1	6.49	-6.49	-1	27.2	0.00027	-1.5	-0.6	0.020495	1	1	0
ENSMUSG00000025871	4833439L19RIK	RIKEN cDNA 4833439L19 gene	cytoplasm|	biological_process|oxidation-reduction process|	molecular_function|N-ethylmaleimide reductase activity|oxidoreductase activity|reduced coenzyme F420 dehydrogenase activity|sulfur oxygenase reductase activity|malolactic enzyme activity|NADPH:sulfur oxidoreductase activity|epoxyqueuosine reductase activity|	10	-2	23.1	-23.1	10	-2.3	4.89	-4.89	-2.2	27.2	0.00027	-3.9	-1.6	0.020495	1	1	0
ENSMUSG00000069305	HIST1H4N	histone cluster 1, H4n	nuclear chromosome|nucleus|membrane|protein complex|extracellular vesicular exosome|	DNA replication-dependent nucleosome assembly|DNA replication-independent nucleosome assembly|negative regulation of megakaryocyte differentiation|	poly(A) RNA binding|	10	1.5	17.4	17.4	8	1.6	10.1	10.1	1.5	27.1	0.00028	1.1	2.6	0.020717	1	1	0
ENSMUSG00000059555	TOR4A	torsin family 4, member A	integral component of membrane|	chaperone mediated protein folding requiring cofactor|	ATP binding|nucleoside-triphosphatase activity|	10	-1.8	23.4	-23.4	10	-1.1	5.85	-5.85	-1.4	27.1	0.00028	-2.4	-0.5	0.020717	1	1	0
ENSMUSG00000041459	TARDBP	TAR DNA binding protein	nucleus|	regulation of transcription, DNA-templated|transcription from RNA polymerase II promoter|mRNA processing|cell death|RNA splicing|negative regulation by host of viral transcription|3'-UTR-mediated mRNA stabilization|	nucleotide binding|double-stranded DNA binding|sequence-specific DNA binding transcription factor activity|RNA binding|mRNA 3'-UTR binding|protein binding|identical protein binding|poly(A) RNA binding|	6	-2.3	22.3	-22.3	6	-1.9	5.56	-5.56	-2.3	27	0.00029	-3.9	-1.7	0.021303	1	1	0
ENSMUSG00000025393	ATP5B	ATP synthase, H+ transporting, mitochondrial F1 complex, beta polypeptide	nucleus|mitochondrion|mitochondrial proton-transporting ATP synthase complex|mitochondrial proton-transporting ATP synthase, catalytic core|mitochondrial matrix|mitochondrial matrix|plasma membrane|cell surface|membrane|mitochondrial membrane|mitochondrial nucleoid|extracellular vesicular exosome|	angiogenesis|osteoblast differentiation|generation of precursor metabolites and energy|ATP catabolic process|lipid metabolic process|ATP biosynthetic process|negative regulation of cell adhesion involved in substrate-bound cell migration|ATP hydrolysis coupled proton transport|proton transport|respiratory electron transport chain|mitochondrial ATP synthesis coupled proton transport|mitochondrial …	transporter activity|protein binding|ATP binding|ATPase activity|transmembrane transporter activity|MHC class I protein binding|proton-transporting ATP synthase activity, rotational mechanism|proton-transporting ATPase activity, rotational mechanism|	6	1.2	14.1	14.1	7	1.1	13.3	13.3	1.2	26.9	0.0003	0.8	1.8	0.0219589	1	1	0
ENSMUSG00000020899	PFAS	phosphoribosylformylglycinamidine synthase	cytosol|extracellular vesicular exosome|	purine nucleobase metabolic process|'de novo' IMP biosynthetic process|'de novo' IMP biosynthetic process|glutamine metabolic process|purine ribonucleoside monophosphate biosynthetic process|response to drug|small molecule metabolic process|nucleobase-containing small molecule metabolic process|	phosphoribosylformylglycinamidine synthase activity|ATP binding|	8	1.2	16.7	16.7	7	1.2	10.6	10.6	1.2	26.9	0.0003	0.9	1.8	0.0219589	1	1	0
ENSMUSG00000037761	ACTR5	ARP5 actin-related protein 5 homolog (yeast)	nucleus|cytoplasm|Ino80 complex|	double-strand break repair|DNA recombination|transcription, DNA-templated|regulation of transcription, DNA-templated|UV-damage excision repair|	protein binding|	9	0.9	19.5	19.5	9	0.8	7.81	7.81	0.9	26.9	0.0003	0.6	1.4	0.0219589	1	1	0
ENSMUSG00000029730	MCM7	minichromosome maintenance complex component 7	chromatin|nucleus|nucleoplasm|cytoplasm|cytosol|membrane|MCM complex|MCM complex|	G1/S transition of mitotic cell cycle|mitotic cell cycle|DNA replication|DNA unwinding involved in DNA replication|DNA replication initiation|DNA strand elongation involved in DNA replication|cellular response to DNA damage stimulus|cell proliferation|regulation of phosphorylation|response to drug|cellular response to epidermal growth factor stimulus|	DNA binding|single-stranded DNA binding|ATP-dependent DNA helicase activity|protein binding|ATP binding|	7	1.7	23.6	23.6	7	1.3	4.22	4.22	1.6	26.9	0.0003	1.1	2.6	0.0219589	1	1	0
ENSMUSG00000069309	HIST1H2AN	histone cluster 1, H2an	nucleus|extracellular vesicular exosome|	biological_process|	enzyme binding|	4	1.3	8	8	4	1.4	19.2	19.2	1.4	26.8	0.0003	1	2.7	0.0219589	1	1	0
ENSMUSG00000034311	KIF4	kinesin family member 4	nucleus|chromosome|cytoplasm|cytoskeleton|kinesin complex|microtubule|membrane|midbody|	microtubule-based movement|	nucleotide binding|DNA binding|microtubule motor activity|ATP binding|microtubule binding|	7	0.3	0.737	0.737	8	1.8	29.2	29.2	1.8	26.7	0.00031	1.2	3.5	0.0222928	1	1	0
ENSMUSG00000022664	SLC35A5	solute carrier family 35, member A5	Golgi membrane|integral component of membrane|	carbohydrate transport|nucleotide-sugar transport|proton transport|nucleotide transmembrane transport|	nucleotide-sugar transmembrane transporter activity|sugar:proton symporter activity|	10	-1	14.8	-14.8	10	-1.9	15.2	-15.2	-1.3	26.7	0.00031	-2.3	-0.8	0.0222928	1	1	0
ENSMUSG00000022881	RFC4	replication factor C (activator 1) 4, 37kDa	nucleoplasm|DNA replication factor C complex|	mitotic cell cycle|telomere maintenance via recombination|telomere maintenance|DNA replication|DNA replication|DNA strand elongation involved in DNA replication|DNA repair|DNA repair|transcription-coupled nucleotide-excision repair|nucleotide-excision repair|nucleotide-excision repair, DNA gap filling|telomere maintenance via semi-conservative replication|phosphatidylinositol-mediated signaling|	DNA binding|protein binding|ATP binding|nucleoside-triphosphatase activity|	6	1.5	15.5	15.5	6	2.2	13.4	13.4	1.9	26.7	0.00031	1.1	3.3	0.0222928	1	1	0
ENSMUSG00000090071	CDK5R2	cyclin-dependent kinase 5, regulatory subunit 2 (p39)	cytoplasm|plasma membrane|cyclin-dependent protein kinase 5 holoenzyme complex|	regulation of cyclin-dependent protein serine/threonine kinase activity|neuron migration|cerebellum development|superior olivary nucleus maturation|hippocampus development|layer formation in cerebral cortex|positive regulation of calcium ion-dependent exocytosis|positive regulation of protein serine/threonine kinase activity|	lipid binding|cyclin-dependent protein kinase 5 activator activity|	10	-2	24.4	-24.4	10	-1.1	4.57	-4.57	-1.9	26.6	0.00034	-3.3	-0.6	0.0241955	1	1	0
ENSMUSG00000024174	POT1B	protection of telomeres 1B	nuclear telomere cap complex|nuclear chromosome, telomeric region|	regulation of cell growth|cell aging|cell aging|telomere capping|protection from non-homologous end joining at telomere|telomere maintenance in response to DNA damage|negative regulation of DNA recombination at telomere|chromosome organization|chromosome organization|chromosome organization|	protein binding|single-stranded telomeric DNA binding|	10	0.5	6.25	6.25	10	2	24.6	24.6	0.9	26.4	0.00039	0.4	2.8	0.0276576	1	1	0
ENSMUSG00000013465	NELFB	negative elongation factor complex member B	nucleus|nucleoplasm|cytoplasm|NELF complex|	transcription from RNA polymerase II promoter|transcription elongation from RNA polymerase II promoter|gene expression|viral process|negative regulation of transcription, DNA-templated|positive regulation of viral transcription|	protein binding|	10	1.4	12.5	12.5	9	1.5	14.4	14.4	1.4	26.4	0.00039	0.9	2.2	0.0276576	1	1	0
ENSMUSG00000029915	CLEC5A	C-type lectin domain family 5, member A	plasma membrane|integral component of plasma membrane|cell surface|	osteoblast development|cellular defense response|signal transduction|response to virus|response to virus|viral process|negative regulation of myeloid cell apoptotic process|negative regulation of apoptotic process|innate immune response|innate immune response|positive regulation of cytokine secretion|	virus receptor activity|carbohydrate binding|	10	-1.8	21.2	-21.2	10	-2	5.64	-5.64	-1.8	26.4	0.00039	-3.5	-1.1	0.0276576	1	1	0
ENSMUSG00000096706	GM21854	N/A	None	None	None	10	-2	23.9	-23.9	10	-1.2	4.17	-4.17	-1.9	26.4	0.00039	-3.6	-0.8	0.0276576	1	1	0
ENSMUSG00000030699	TBX6	T-box 6	nucleus|	negative regulation of transcription from RNA polymerase II promoter|mesoderm formation|cell fate specification|transcription, DNA-templated|mesoderm development|anatomical structure morphogenesis|signal transduction involved in regulation of gene expression|	RNA polymerase II transcription factor binding|RNA polymerase II activating transcription factor binding|RNA polymerase II transcription factor binding transcription factor activity involved in negative regulation of transcription|DNA binding|sequence-specific DNA binding transcription factor activity|	10	-1.9	22.9	-22.9	10	-1.8	4	-4	-1.8	26.4	0.00039	-3	-1.3	0.0276576	1	1	0
ENSMUSG00000031696	VPS35	vacuolar protein sorting 35 homolog (S. cerevisiae)	lysosomal membrane|endosome|cytosol|cytosol|retromer complex|extracellular vesicular exosome|	cell death|protein transport|retrograde transport, endosome to Golgi|	protein binding|	10	-0.7	22.8	-22.8	10	-0.6	3.98	-3.98	-0.7	26.4	0.00039	-1	-0.4	0.0276576	1	1	0
ENSMUSG00000050030	OLFR728	olfactory receptor 728	plasma membrane|membrane|integral component of membrane|	signal transduction|G-protein coupled receptor signaling pathway|sensory perception of smell|response to stimulus|detection of chemical stimulus involved in sensory perception of smell|	signal transducer activity|G-protein coupled receptor activity|olfactory receptor activity|	10	-2.7	30	-30	10	0	0	0	-2.7	26.4	0.00039	-5	-2.2	0.0276576	1	1	0
ENSMUSG00000031666	RBL2	retinoblastoma-like 2	nucleus|nucleoplasm|transcription factor complex|nucleolus|cytoplasm|extracellular vesicular exosome|	mitotic cell cycle|transcription, DNA-templated|regulation of transcription from RNA polymerase II promoter|chromatin modification|regulation of lipid kinase activity|regulation of cell cycle|	DNA binding|protein binding|	9	1	9.92	9.92	9	1.2	17	17	1.1	26.3	0.0004	0.8	1.9	0.0276959	1	1	0
ENSMUSG00000029014	DNAJC2	DnaJ (Hsp40) homolog, subfamily C, member 2	nucleus|cytoplasm|cytosol|nuclear membrane|	DNA replication|transcription, DNA-templated|chromatin modification|negative regulation of cell growth|positive regulation of transcription, DNA-templated|'de novo' cotranslational protein folding|negative regulation of DNA biosynthetic process|	DNA binding|chromatin binding|Hsp70 protein binding|histone binding|ubiquitin binding|poly(A) RNA binding|	10	0.9	17.2	17.2	10	1	9.43	9.43	0.9	26.2	0.00041	0.5	1.4	0.0282928	1	1	0
ENSMUSG00000096839	GM3460	predicted gene 3460	cellular_component|	biological_process|	molecular_function|	9	0.6	20.6	20.6	8	0.8	6.27	6.27	0.6	26.2	0.00041	0.4	1	0.0282928	1	1	0
ENSMUSG00000041264	USPL1	ubiquitin specific peptidase like 1	extracellular space|Cajal body|	proteolysis|cell proliferation|protein desumoylation|Cajal body organization|	protein binding|SUMO binding|SUMO-specific isopeptidase activity|	8	1.8	22.4	22.4	8	1	6.16	6.16	1.7	26.2	0.00041	1.3	2.8	0.0282928	1	1	0
ENSMUSG00000035042	CCL5	chemokine (C-C motif) ligand 5	extracellular region|extracellular space|cytoplasm|	MAPK cascade|dendritic cell chemotaxis|monocyte chemotaxis|regulation of chronic inflammatory response|protein phosphorylation|calcium ion transport|cellular calcium ion homeostasis|exocytosis|chemotaxis|inflammatory response|leukocyte cell-cell adhesion|cell-cell signaling|response to virus|response to toxic substance|positive regulation of activation of JAK2 kinase activity|positive regulation …	phosphatidylinositol phospholipase C activity|protein kinase activity|protein binding|chemokine activity|chemokine activity|phospholipase activator activity|receptor signaling protein tyrosine kinase activator activity|CCR1 chemokine receptor binding|CCR1 chemokine receptor binding|CCR1 chemokine receptor binding|CCR4 chemokine receptor binding|CCR5 chemokine receptor binding|chemoattractant acti…	10	1.3	9.66	9.66	10	2	19	19	1.8	25.9	0.00043	0.7	2.9	0.0293762	1	1	0
ENSMUSG00000020573	PIK3CG	phosphatidylinositol-4,5-bisphosphate 3-kinase, catalytic subunit gamma	cytoplasm|cytosol|plasma membrane|1-phosphatidylinositol-4-phosphate 3-kinase, class IB complex|membrane|mast cell granule|	angiogenesis|cytokine production|adaptive immune response|dendritic cell chemotaxis|positive regulation of acute inflammatory response|respiratory burst involved in defense response|protein phosphorylation|phospholipid metabolic process|phosphatidylinositol biosynthetic process|endocytosis|inflammatory response|G-protein coupled receptor signaling pathway|positive regulation of cytosolic calcium …	protein kinase activity|protein serine/threonine kinase activity|protein binding|ATP binding|1-phosphatidylinositol-3-kinase activity|phosphatidylinositol 3-kinase activity|1-phosphatidylinositol-4-phosphate 3-kinase activity|ephrin receptor binding|phosphatidylinositol-4,5-bisphosphate 3-kinase activity|	10	1.2	13.7	13.7	10	1.2	12.6	12.6	1.2	25.9	0.00043	0.8	1.7	0.0293762	1	1	0
ENSMUSG00000033166	DIS3	DIS3 exosome endoribonuclease and 3'-5' exoribonuclease	nuclear exosome (RNase complex)|exosome (RNase complex)|nucleus|nucleoplasm|cytoplasm|cytosol|membrane|	nuclear-transcribed mRNA catabolic process, deadenylation-dependent decay|rRNA processing|gene expression|RNA metabolic process|mRNA metabolic process|rRNA catabolic process|positive regulation of GTPase activity|exonucleolytic nuclear-transcribed mRNA catabolic process involved in deadenylation-dependent decay|CUT catabolic process|nucleic acid phosphodiester bond hydrolysis|RNA phosphodiester b…	3'-5'-exoribonuclease activity|RNA binding|endonuclease activity|guanyl-nucleotide exchange factor activity|protein binding|	9	1.3	14.8	14.8	8	1.4	11.6	11.6	1.3	25.9	0.00043	0.9	2.1	0.0293762	1	1	0
ENSMUSG00000053749	GM9920	predicted gene 9920	cellular_component|	biological_process|	molecular_function|	9	-1.4	15.4	-15.4	9	-1.3	11.1	-11.1	-1.3	25.9	0.00043	-2.1	-0.9	0.0293762	1	1	0
ENSMUSG00000030104	EDEM1	ER degradation enhancer, mannosidase alpha-like 1	endoplasmic reticulum membrane|integral component of endoplasmic reticulum membrane|	protein folding|activation of signaling protein activity involved in unfolded protein response|protein N-linked glycosylation via asparagine|ER-associated ubiquitin-dependent protein catabolic process|endoplasmic reticulum unfolded protein response|post-translational protein modification|cellular protein metabolic process|	calcium ion binding|protein binding|misfolded protein binding|	10	1.8	22.3	22.3	10	0.8	7.6	7.6	1.8	25.9	0.00043	0.6	2.6	0.0293762	1	1	0
ENSMUSG00000004099	DNMT1	DNA (cytosine-5-)-methyltransferase 1	nucleus|replication fork|centromeric heterochromatin|	negative regulation of transcription from RNA polymerase II promoter|DNA methylation|transcription, DNA-templated|maintenance of DNA methylation|positive regulation of gene expression|gene silencing|chromatin modification|regulation of cell proliferation|positive regulation of histone H3-K4 methylation|negative regulation of histone H3-K9 methylation|cellular response to amino acid stimulus|C-5 m…	DNA binding|chromatin binding|RNA binding|DNA (cytosine-5-)-methyltransferase activity|protein binding|transcription factor binding|zinc ion binding|methyl-CpG binding|DNA-methyltransferase activity|	10	1	21.6	21.6	9	0.7	5.68	5.68	1	25.9	0.00043	0.6	1.5	0.0293762	1	1	0
ENSMUSG00000031231	COX7B	cytochrome c oxidase subunit VIIb	mitochondrial inner membrane|mitochondrial respiratory chain|integral component of membrane|	central nervous system development|respiratory electron transport chain|cellular metabolic process|small molecule metabolic process|hydrogen ion transmembrane transport|hydrogen ion transmembrane transport|	cytochrome-c oxidase activity|	8	1.6	23	23	7	0.7	6.3	6.3	1.5	25.8	0.00043	1.1	2.6	0.0293762	1	1	0
ENSMUSG00000090872	GM3239	predicted gene 3239	None	None	None	9	1.8	26.1	26.1	9	1.1	0.971	0.971	1.8	25.8	0.00043	1	2.9	0.0293762	1	1	0
ENSMUSG00000005625	PSMD4	proteasome (prosome, macropain) 26S subunit, non-ATPase, 4	proteasome complex|nucleus|nucleoplasm|cytoplasm|cytosol|proteasome regulatory particle, base subcomplex|proteasome accessory complex|	G1/S transition of mitotic cell cycle|protein polyubiquitination|mitotic cell cycle|antigen processing and presentation of peptide antigen via MHC class I|antigen processing and presentation of exogenous peptide antigen via MHC class I, TAP-dependent|regulation of cellular amino acid metabolic process|apoptotic process|DNA damage response, signal transduction by p53 class mediator resulting in ce…	protein binding|identical protein binding|poly(A) RNA binding|	10	1.3	13.4	13.4	10	1.2	12.8	12.8	1.2	25.7	0.00044	0.7	1.9	0.0292786	1	1	0
ENSMUSG00000034165	CCND3	cyclin D3	cyclin-dependent protein kinase holoenzyme complex|nucleus|cytoplasm|membrane|	positive regulation of protein phosphorylation|cell cycle|signal transduction|T cell proliferation|positive regulation of cyclin-dependent protein serine/threonine kinase activity|cell division|	cyclin-dependent protein serine/threonine kinase activity|protein binding|protein kinase binding|	10	0.7	18.3	18.3	10	1.5	10.1	10.1	0.8	25.7	0.00044	0.5	1.7	0.0292786	1	1	0
ENSMUSG00000037946	FGD3	FYVE, RhoGEF and PH domain containing 3	ruffle|cytoplasm|Golgi apparatus|cytosol|cytoskeleton|lamellipodium|	cytoskeleton organization|small GTPase mediated signal transduction|regulation of cell shape|actin cytoskeleton organization|positive regulation of Rho GTPase activity|positive regulation of apoptotic process|regulation of Cdc42 GTPase activity|positive regulation of GTPase activity|filopodium assembly|neurotrophin TRK receptor signaling pathway|regulation of small GTPase mediated signal transduc…	guanyl-nucleotide exchange factor activity|Rho guanyl-nucleotide exchange factor activity|small GTPase binding|metal ion binding|	10	-0.7	18.5	-18.5	10	-0.7	7.61	-7.61	-0.7	25.7	0.00044	-1	-0.5	0.0292786	1	1	0
ENSMUSG00000026872	ZEB2	zinc finger E-box binding homeobox 2	nucleus|	negative regulation of transcription from RNA polymerase II promoter|neural crest cell migration|somitogenesis|neural tube closure|transcription, DNA-templated|nervous system development|hippocampus development|cell proliferation in forebrain|positive regulation of Wnt signaling pathway|positive regulation of JUN kinase activity|positive regulation of melanocyte differentiation|positive regulatio…	sequence-specific DNA binding transcription factor activity|phosphatase regulator activity|sequence-specific DNA binding|metal ion binding|R-SMAD binding|	9	0.7	8.1	8.1	8	1.3	20.9	20.9	1.1	25.6	0.00046	0.6	1.9	0.0303141	1	1	0
ENSMUSG00000030557	MEF2A	myocyte enhancer factor 2A	nuclear chromatin|nucleus|nucleoplasm|cytoplasm|	mitochondrial genome maintenance|negative regulation of transcription from RNA polymerase II promoter|MAPK cascade|toll-like receptor signaling pathway|MyD88-dependent toll-like receptor signaling pathway|MyD88-independent toll-like receptor signaling pathway|transcription, DNA-templated|transcription from RNA polymerase II promoter|transcription from RNA polymerase II promoter|apoptotic process|…	RNA polymerase II regulatory region sequence-specific DNA binding|RNA polymerase II core promoter proximal region sequence-specific DNA binding|sequence-specific DNA binding RNA polymerase II transcription factor activity|RNA polymerase II core promoter proximal region sequence-specific DNA binding transcription factor activity involved in positive regulation of transcription|RNA polymerase II tr…	10	1.4	13.8	13.8	10	1.2	12.3	12.3	1.4	25.6	0.00046	0.7	2	0.0303141	1	1	0
ENSMUSG00000096194	GM2799	predicted gene 2799	cellular_component|	biological_process|	molecular_function|	8	1.3	14.4	14.4	7	1.3	11.5	11.5	1.3	25.6	0.00046	1	2.4	0.0303141	1	1	0
ENSMUSG00000022565	PLEC	plectin	cytoplasm|cytosol|plasma membrane|focal adhesion|sarcoplasm|hemidesmosome|sarcolemma|costamere|intermediate filament cytoskeleton|extracellular vesicular exosome|	apoptotic process|cellular component disassembly involved in execution phase of apoptosis|extracellular matrix organization|hemidesmosome assembly|hemidesmosome assembly|cell junction assembly|	actin binding|protein binding|structural constituent of muscle|structural constituent of muscle|ankyrin binding|poly(A) RNA binding|	10	-1	18.7	-18.7	10	-1.1	7.4	-7.4	-1.1	25.6	0.00046	-1.7	-0.6	0.0303141	1	1	0
ENSMUSG00000066107	GM12666	predicted gene 12666	cellular_component|	biological_process|	molecular_function|	10	-1.1	13.5	-13.5	10	-1.4	12.8	-12.8	-1.1	25.5	0.00047	-1.9	-0.8	0.0305798	1	1	0
ENSMUSG00000054408	SPCS3	signal peptidase complex subunit 3 homolog (S. cerevisiae)	endoplasmic reticulum|signal peptidase complex|endoplasmic reticulum membrane|integral component of membrane|	translation|signal peptide processing|proteolysis|SRP-dependent cotranslational protein targeting to membrane|gene expression|cellular protein metabolic process|regulation of insulin secretion|	peptidase activity|	9	1.6	20.1	20.1	9	1.4	6.04	6.04	1.6	25.5	0.00047	1.2	2.6	0.0305798	1	1	0
ENSMUSG00000095934	GM2927	predicted gene 2927	cellular_component|	biological_process|	molecular_function|	8	1.3	14.8	14.8	7	1.4	11.1	11.1	1.3	25.4	0.00049	1	2.4	0.03168	1	1	0
ENSMUSG00000032437	STT3B	STT3B, subunit of the oligosaccharyltransferase complex (catalytic)	oligosaccharyltransferase complex|oligosaccharyltransferase complex|membrane|integral component of membrane|	glycoprotein catabolic process|response to unfolded protein|protein N-linked glycosylation via asparagine|protein N-linked glycosylation via asparagine|ER-associated ubiquitin-dependent protein catabolic process|co-translational protein modification|post-translational protein modification|	dolichyl-diphosphooligosaccharide-protein glycotransferase activity|dolichyl-diphosphooligosaccharide-protein glycotransferase activity|	10	0.7	19.2	19.2	10	0.7	6.59	6.59	0.7	25.4	0.00049	0.5	1.2	0.03168	1	1	0
ENSMUSG00000094370	GM3373	predicted gene 3373	None	None	None	10	1.8	25.4	25.4	10	0.8	3.12	3.12	1.8	25.4	0.00049	0.7	2.7	0.03168	1	1	0
ENSMUSG00000096793	GM3002	alpha-takusan pseudogene	None	None	None	10	1.8	26.5	26.5	10	0.6	2.68	2.68	1.8	25.4	0.00049	0.5	2.7	0.03168	1	1	0
ENSMUSG00000026914	PSMD14	proteasome (prosome, macropain) 26S subunit, non-ATPase, 14	proteasome complex|nucleus|nucleoplasm|cytosol|proteasome regulatory particle, lid subcomplex|proteasome accessory complex|extracellular vesicular exosome|	G1/S transition of mitotic cell cycle|protein polyubiquitination|mitotic cell cycle|double-strand break repair via homologous recombination|antigen processing and presentation of peptide antigen via MHC class I|antigen processing and presentation of exogenous peptide antigen via MHC class I, TAP-dependent|double-strand break repair via nonhomologous end joining|ubiquitin-dependent protein catabol…	ubiquitin thiolesterase activity|ubiquitin thiolesterase activity|metallopeptidase activity|metal ion binding|endopeptidase activator activity|proteasome binding|	10	0.7	8.07	8.07	9	1.9	22.4	22.4	1.7	25.3	0.00052	0.6	3	0.0332006	1	1	0
ENSMUSG00000073676	HSPE1	heat shock 10kDa protein 1	mitochondrion|mitochondrion|mitochondrial matrix|membrane|extracellular vesicular exosome|	osteoblast differentiation|protein folding|activation of cysteine-type endopeptidase activity involved in apoptotic process|response to unfolded protein|	protein binding|ATP binding|poly(A) RNA binding|unfolded protein binding|chaperone binding|chaperone binding|	4	1.4	13.2	13.2	4	1.5	12.5	12.5	1.4	25.3	0.00052	1	2.7	0.0332006	1	1	0
ENSMUSG00000016253	NELFCD	negative elongation factor complex member C/D	nucleoplasm|membrane|NELF complex|	transcription from RNA polymerase II promoter|transcription elongation from RNA polymerase II promoter|gene expression|viral process|negative regulation of transcription, DNA-templated|positive regulation of viral transcription|	protein binding|	9	0.9	22.5	22.5	9	1	3.17	3.17	0.9	25.3	0.00052	0.6	1.5	0.0332006	1	1	0
ENSMUSG00000004285	ATP6V1F	ATPase, H+ transporting, lysosomal 14kDa, V1 subunit F	cytosol|membrane|proton-transporting two-sector ATPase complex|vacuolar proton-transporting V-type ATPase complex|proton-transporting V-type ATPase, V1 domain|extracellular vesicular exosome|	ATP catabolic process|cellular iron ion homeostasis|insulin receptor signaling pathway|ATP hydrolysis coupled proton transport|proton transport|transferrin transport|interaction with host|transmembrane transport|phagosome maturation|	protein binding|hydrogen ion transmembrane transporter activity|ATPase activity, uncoupled|proton-transporting ATPase activity, rotational mechanism|	8	-0.7	13.1	-13.1	8	-1.2	13.8	-13.8	-1	25.2	0.00056	-1.5	-0.6	0.0354235	1	1	0
ENSMUSG00000030965	FAM175B	family with sequence similarity 175, member B	BRISC complex|	None	polyubiquitin binding|	10	0.7	17.1	17.1	10	0.9	9.03	9.03	0.7	25.2	0.00056	0.5	1.2	0.0354235	1	1	0
ENSMUSG00000019907	PPP1R12A	protein phosphatase 1, regulatory subunit 12A	kinetochore|nucleoplasm|cytoplasm|centrosome|actin cytoskeleton|contractile fiber|PTW/PP1 phosphatase complex|	G2/M transition of mitotic cell cycle|mitotic cell cycle|protein dephosphorylation|mitotic nuclear division|signal transduction|regulation of cell adhesion|regulation of myosin-light-chain-phosphatase activity|negative regulation of catalytic activity|positive regulation of transcription from RNA polymerase II promoter|regulation of nucleocytoplasmic transport|centrosome organization|	enzyme inhibitor activity|signal transducer activity|protein binding|phosphatase regulator activity|phosphatase regulator activity|protein kinase binding|14-3-3 protein binding|	9	0.6	17.8	17.8	9	0.7	8	8	0.6	25.2	0.00056	0.4	1	0.0354235	1	1	0
ENSMUSG00000079555	HAUS3	HAUS augmin-like complex, subunit 3	cytoplasm|centrosome|spindle|microtubule|HAUS complex|	mitotic nuclear division|spindle assembly|centrosome organization|	molecular_function|	9	1	20.5	20.5	9	1.1	5.09	5.09	1	25.2	0.00056	0.7	1.6	0.0354235	1	1	0
ENSMUSG00000063229	LDHA	lactate dehydrogenase A	nucleus|mitochondrion|cytosol|cilium|membrane|extracellular vesicular exosome|	pyruvate metabolic process|glycolytic process|substantia nigra development|cellular response to extracellular stimulus|cellular metabolic process|cellular carbohydrate metabolic process|small molecule metabolic process|oxidation-reduction process|	L-lactate dehydrogenase activity|protein binding|	10	-1.6	22.9	-22.9	10	-0.8	4.96	-4.96	-1.5	25.2	0.00056	-2.3	-0.9	0.0354235	1	1	0
ENSMUSG00000027297	LTK	leukocyte receptor tyrosine kinase	plasma membrane|integral component of plasma membrane|membrane|	protein phosphorylation|signal transduction|transmembrane receptor protein tyrosine kinase signaling pathway|cell proliferation|positive regulation of cardiac muscle cell apoptotic process|positive regulation of neuron projection development|phosphatidylinositol 3-kinase signaling|peptidyl-tyrosine phosphorylation|peptidyl-tyrosine phosphorylation|negative regulation of apoptotic process|cellular…	protein kinase activity|protein tyrosine kinase activity|transmembrane receptor protein tyrosine kinase activity|ATP binding|	9	-1.9	24.6	-24.6	9	0.6	3.98	3.98	-1.8	25.2	0.00056	-3	-0.6	0.0354235	1	1	0
ENSMUSG00000090547	GM8265	predicted gene 8265	cellular_component|	biological_process|	molecular_function|	10	0.9	22.3	22.3	9	0.6	3.94	3.94	0.8	25.2	0.00056	0.5	1.4	0.0354235	1	1	0
ENSMUSG00000054836	ELP6	elongator acetyltransferase complex subunit 6	Elongator holoenzyme complex|	chromatin organization|transcription, DNA-templated|regulation of transcription, DNA-templated|biological_process|positive regulation of cell migration|	molecular_function|	9	1.3	12.5	12.5	9	0.8	14.3	14.3	0.9	25.1	0.00059	0.5	1.5	0.0365319	1	1	0
ENSMUSG00000004788	EIF2B2	eukaryotic translation initiation factor 2B, subunit 2 beta, 39kDa	cytoplasm|cytosol|eukaryotic translation initiation factor 2B complex|	ovarian follicle development|translation|translational initiation|translational initiation|regulation of translational initiation|regulation of translational initiation|central nervous system development|response to heat|response to heat|response to glucose|gene expression|oligodendrocyte development|myelination|response to peptide hormone|positive regulation of GTPase activity|positive regulatio…	translation initiation factor activity|guanyl-nucleotide exchange factor activity|guanyl-nucleotide exchange factor activity|protein binding|ATP binding|GTP binding|	6	0.9	13.6	13.6	6	1	12.1	12.1	0.9	25.1	0.00059	0.7	1.7	0.0365319	1	1	0
ENSMUSG00000024807	SYVN1	synovial apoptosis inhibitor 1, synoviolin	nucleus|endoplasmic reticulum|endoplasmic reticulum membrane|membrane|integral component of membrane|	in utero embryonic development|activation of signaling protein activity involved in unfolded protein response|protein ubiquitination|protein N-linked glycosylation via asparagine|ER-associated ubiquitin-dependent protein catabolic process|ER-associated ubiquitin-dependent protein catabolic process|endoplasmic reticulum unfolded protein response|cellular protein metabolic process|negative regulati…	protein binding|zinc ion binding|acid-amino acid ligase activity|	10	-1	22.9	-22.9	10	-0.5	3.44	-3.44	-0.9	25.1	0.00059	-1.4	-0.5	0.0365319	1	1	0
ENSMUSG00000058793	CDS2	CDP-diacylglycerol synthase (phosphatidate cytidylyltransferase) 2	mitochondrial inner membrane|endoplasmic reticulum|membrane|integral component of membrane|	phospholipid metabolic process|phosphatidylglycerol biosynthetic process|CDP-diacylglycerol biosynthetic process|small molecule metabolic process|glycerophospholipid biosynthetic process|	phosphatidate cytidylyltransferase activity|	10	0.4	8.74	8.74	10	1.7	23.9	23.9	0.7	25	0.00061	0.4	2.5	0.037431	1	1	0
ENSMUSG00000039001	RPS21	ribosomal protein S21	cytoplasm|cytosol|small ribosomal subunit|cytosolic small ribosomal subunit|cytosolic small ribosomal subunit|	nuclear-transcribed mRNA catabolic process, nonsense-mediated decay|endonucleolytic cleavage in ITS1 to separate SSU-rRNA from 5.8S rRNA and LSU-rRNA from tricistronic rRNA transcript (SSU-rRNA, 5.8S rRNA, LSU-rRNA)|endonucleolytic cleavage to generate mature 3'-end of SSU-rRNA from (SSU-rRNA, 5.8S rRNA, LSU-rRNA)|translation|translation|translation|translational initiation|translational elongati…	structural constituent of ribosome|poly(A) RNA binding|protein N-terminus binding|	6	-1.9	24.4	-24.4	6	1	2.26	2.26	-1.9	25	0.00061	-3	-1.3	0.037431	1	1	0
ENSMUSG00000028683	EIF2B3	eukaryotic translation initiation factor 2B, subunit 3 gamma, 58kDa	cytoplasm|cytosol|eukaryotic translation initiation factor 2B complex|	translation|translational initiation|translational initiation|response to heat|response to heat|response to glucose|gene expression|oligodendrocyte development|negative regulation of translational initiation in response to stress|response to peptide hormone|positive regulation of GTPase activity|positive regulation of GTPase activity|positive regulation of GTPase activity|cellular protein metabol…	translation initiation factor activity|guanyl-nucleotide exchange factor activity|guanyl-nucleotide exchange factor activity|protein binding|translation factor activity, nucleic acid binding|nucleotidyltransferase activity|	9	0.6	11.3	11.3	9	2.1	21.1	21.1	0.7	24.9	0.00062	0.4	3.1	0.0378182	1	1	0
ENSMUSG00000021287	XRCC3	X-ray repair complementing defective repair in Chinese hamster cells 3	nucleus|replication fork|cytoplasm|mitochondrion|Rad51C-XRCC3 complex|perinuclear region of cytoplasm|	double-strand break repair via homologous recombination|DNA catabolic process, endonucleolytic|ATP catabolic process|DNA repair|DNA recombination|cellular response to DNA damage stimulus|response to organic substance|regulation of centrosome duplication|resolution of mitotic recombination intermediates|positive regulation of mitotic cell cycle spindle assembly checkpoint|	four-way junction DNA binding|protein binding|ATP binding|DNA-dependent ATPase activity|crossover junction endodeoxyribonuclease activity|	9	1	25.3	25.3	9	0.4	1.01	1.01	0.9	24.9	0.00062	0.6	1.5	0.0378182	1	1	0
ENSMUSG00000016921	SRSF6	serine/arginine-rich splicing factor 6	nucleus|nucleoplasm|nuclear speck|	alternative mRNA splicing, via spliceosome|regulation of alternative mRNA splicing, via spliceosome|regulation of alternative mRNA splicing, via spliceosome|mRNA splicing, via spliceosome|transcription from RNA polymerase II promoter|termination of RNA polymerase II transcription|mRNA splice site selection|mRNA export from nucleus|RNA splicing|gene expression|regulation of keratinocyte proliferat…	nucleotide binding|RNA binding|pre-mRNA binding|poly(A) RNA binding|	10	-0.6	16.2	-16.2	10	-0.7	9.02	-9.02	-0.7	24.8	0.00062	-1	-0.4	0.0378182	1	1	0
ENSMUSG00000027079	CLP1	cleavage and polyadenylation factor I subunit 1	tRNA-intron endonuclease complex|nucleus|nucleoplasm|mRNA cleavage factor complex|	mRNA splicing, via spliceosome|transcription from RNA polymerase II promoter|termination of RNA polymerase II transcription|tRNA splicing, via endonucleolytic cleavage and ligation|tRNA splicing, via endonucleolytic cleavage and ligation|cell death|RNA splicing|gene expression|phosphorylation|cerebellar cortex development|targeting of mRNA for destruction involved in RNA interference|mRNA 3'-end …	ATP binding|ATP-dependent polydeoxyribonucleotide 5'-hydroxyl-kinase activity|polydeoxyribonucleotide kinase activity|ATP-dependent polyribonucleotide 5'-hydroxyl-kinase activity|ATP-dependent polyribonucleotide 5'-hydroxyl-kinase activity|	8	1.1	19.8	19.8	9	0.7	6.4	6.4	1.1	24.8	0.00062	0.8	1.7	0.0378182	1	1	0
ENSMUSG00000019763	RMND1	required for meiotic nuclear division 1 homolog (S. cerevisiae)	mitochondrion|	translation|	None	10	-1.8	19.5	-19.5	10	-1.9	5.79	-5.79	-1.8	24.8	0.00062	-3.6	-1.1	0.0378182	1	1	0
ENSMUSG00000063556	GM10132	ribosomal protein L23A pseudogene	None	None	None	6	1.2	13.4	13.4	6	1.1	11.6	11.6	1.2	24.6	0.00066	0.8	1.9	0.0396677	1	1	0
ENSMUSG00000026192	ATIC	5-aminoimidazole-4-carboxamide ribonucleotide formyltransferase/IMP cyclohydrolase	mitochondrion|cytosol|membrane|extracellular vesicular exosome|	brainstem development|nucleobase-containing compound metabolic process|purine nucleobase metabolic process|'de novo' IMP biosynthetic process|nucleoside metabolic process|purine ribonucleoside monophosphate biosynthetic process|response to inorganic substance|cerebellum development|cerebral cortex development|organ regeneration|small molecule metabolic process|dihydrofolate metabolic process|tetr…	IMP cyclohydrolase activity|phosphoribosylaminoimidazolecarboxamide formyltransferase activity|protein homodimerization activity|	6	1.2	15.2	15.2	6	0.8	11.2	11.2	0.9	24.5	0.0007	0.6	1.7	0.0419488	1	1	0
ENSMUSG00000031530	DUSP4	dual specificity phosphatase 4	nucleus|nucleoplasm|	MAPK cascade|inactivation of MAPK activity|endoderm formation|toll-like receptor signaling pathway|MyD88-dependent toll-like receptor signaling pathway|MyD88-independent toll-like receptor signaling pathway|protein dephosphorylation|toll-like receptor 2 signaling pathway|toll-like receptor 3 signaling pathway|toll-like receptor 4 signaling pathway|toll-like receptor 5 signaling pathway|toll-like …	protein tyrosine phosphatase activity|protein tyrosine/serine/threonine phosphatase activity|protein tyrosine/threonine phosphatase activity|MAP kinase tyrosine/serine/threonine phosphatase activity|	10	-0.6	18.9	-18.9	10	-0.7	5.97	-5.97	-0.6	24.5	0.0007	-1.1	-0.4	0.0419488	1	1	0
ENSMUSG00000025995	WDR75	WD repeat domain 75	nucleus|	None	poly(A) RNA binding|	8	1.2	19.2	19.2	8	1.2	5.62	5.62	1.2	24.4	0.00073	0.8	2.1	0.0434923	1	1	0
ENSMUSG00000058546	RPL23A	ribosomal protein L23a	nucleus|cytosol|cytosolic large ribosomal subunit|cytosolic large ribosomal subunit|TORC2 complex|extracellular vesicular exosome|	nuclear-transcribed mRNA catabolic process, nonsense-mediated decay|translation|translation|translational initiation|translational elongation|translational termination|SRP-dependent cotranslational protein targeting to membrane|cell proliferation|gene expression|viral process|RNA metabolic process|mRNA metabolic process|viral life cycle|viral transcription|cellular protein metabolic process|	nucleotide binding|structural constituent of ribosome|protein binding|rRNA binding|poly(A) RNA binding|	6	1.2	13.6	13.6	6	1.1	11.2	11.2	1.2	24.3	0.00073	0.8	1.9	0.0434923	1	1	0
ENSMUSG00000031453	RASA3	RAS p21 protein activator 3	cytoplasm|intrinsic component of the cytoplasmic side of the plasma membrane|	signal transduction|positive regulation of Ras GTPase activity|intracellular signal transduction|negative regulation of Ras protein signal transduction|calcium ion transmembrane transport|	GTPase activator activity|Ras GTPase activator activity|calcium-release channel activity|metal ion binding|	10	-0.8	19.9	-19.9	10	-1.2	5.68	-5.68	-0.8	24.3	0.00073	-1.5	-0.6	0.0434923	1	1	0
ENSMUSG00000039929	URB1	URB1 ribosome biogenesis 1 homolog (S. cerevisiae)	nucleolus|nucleolus|	biological_process|	poly(A) RNA binding|	10	1	21.4	21.4	10	0.6	4.44	4.44	1	24.3	0.00073	0.6	1.5	0.0434923	1	1	0
ENSMUSG00000029547	INTS1	integrator complex subunit 1	membrane|integral component of membrane|nuclear membrane|integrator complex|	inner cell mass cell proliferation|snRNA processing|U2 snRNA 3'-end processing|negative regulation of apoptotic process|negative regulation of cysteine-type endopeptidase activity involved in apoptotic process|	None	9	-0.7	11.5	-11.5	9	-2	17.3	-17.3	-1.2	24.2	0.00076	-2.3	-0.6	0.0447592	1	1	0
ENSMUSG00000021877	ARF4	ADP-ribosylation factor 4	Golgi apparatus|cytosol|membrane|ruffle membrane|extracellular vesicular exosome|	protein ADP-ribosylation|epidermal growth factor receptor signaling pathway|small GTPase mediated signal transduction|brain development|protein transport|vesicle-mediated transport|cell migration|activation of phospholipase D activity|negative regulation of apoptotic process|positive regulation of transcription from RNA polymerase II promoter|response to axon injury|regulation of reactive oxygen …	epidermal growth factor receptor binding|protein binding|GTP binding|	10	0.8	15.8	15.8	10	0.9	8.84	8.84	0.8	24.2	0.00076	0.6	1.3	0.0447592	1	1	0
ENSMUSG00000028577	PLAA	phospholipase A2-activating protein	extracellular vesicular exosome|	phospholipid metabolic process|inflammatory response|signal transduction|positive regulation of catalytic activity|positive regulation of catalytic activity|	protein binding|phospholipase A2 activator activity|	10	-1	19	-19	10	-1.6	7.33	-7.33	-1	24.2	0.00076	-1.9	-0.7	0.0447592	1	1	0
ENSMUSG00000048163	SELPLG	selectin P ligand	plasma membrane|integral component of plasma membrane|membrane|integral component of membrane|	cell adhesion|blood coagulation|leukocyte migration|leukocyte tethering or rolling|leukocyte adhesive activation|cellular response to interleukin-6|	receptor binding|protein binding|	10	1.1	17.8	17.8	10	0.9	7.02	7.02	1	24.2	0.00076	0.7	1.6	0.0447592	1	1	0
ENSMUSG00000056091	ST3GAL5	ST3 beta-galactoside alpha-2,3-sialyltransferase 5	Golgi membrane|integral component of plasma membrane|integral component of membrane|integral component of Golgi membrane|	ganglioside biosynthetic process|carbohydrate metabolic process|protein glycosylation|glycosphingolipid biosynthetic process|sialylation|sialylation|sialylation|	neolactotetraosylceramide alpha-2,3-sialyltransferase activity|sialyltransferase activity|lactosylceramide alpha-2,3-sialyltransferase activity|	10	-1	16.7	-16.7	10	-1.1	7.94	-7.94	-1	24.1	0.00078	-1.6	-0.7	0.0454151	1	1	0
ENSMUSG00000093898	GM3629	predicted gene 3629	None	None	None	8	1.8	27.3	27.3	8	-0.2	0.0886	-0.0886	1.8	24.1	0.00078	1	3	0.0454151	1	1	0
ENSMUSG00000095821	TCSTV3	2-cell-stage, variable group, member 3	cellular_component|	biological_process|	molecular_function|	10	0.7	13.1	13.1	9	0.8	11.3	11.3	0.8	24	0.00083	0.5	1.2	0.0480532	1	1	0
ENSMUSG00000028646	RRAGC	Ras-related GTP binding C	nucleus|cytoplasm|lysosome|intracellular membrane-bounded organelle|	GTP catabolic process|transcription, DNA-templated|apoptotic process|small GTPase mediated signal transduction|RNA splicing|cell growth|cellular protein localization|cellular response to amino acid stimulus|	magnesium ion binding|GTPase activity|protein binding|GTP binding|GDP binding|protein heterodimerization activity|	10	-0.9	16.2	-16.2	10	-1	8.3	-8.3	-0.9	24	0.00083	-1.7	-0.5	0.0480532	1	1	0
ENSMUSG00000020823	SEC14L1	SEC14-like 1 (S. cerevisiae)	Golgi apparatus|membrane|integral component of membrane|	transport|	None	10	-0.7	18.9	-18.9	10	-0.7	5.48	-5.48	-0.7	24	0.00083	-1.1	-0.4	0.0480532	1	1	0
ENSMUSG00000079391	GM2974	predicted gene 2974	cellular_component|	biological_process|	molecular_function|	9	1.8	25.7	25.7	9	-1.7	1.44	-1.44	1.8	24	0.00083	1	3	0.0480532	1	1	0
ENSMUSG00000020898	CTC1	CTS telomere maintenance complex component 1	nuclear chromosome, telomeric region|nucleus|nucleus|Stn1-Ten1 complex|	telomere maintenance|cellular response to DNA damage stimulus|regulation of G2/M transition of mitotic cell cycle|telomere maintenance via telomere lengthening|multicellular organism growth|positive regulation of DNA replication|positive regulation of fibroblast proliferation|spleen development|thymus development|bone marrow development|hematopoietic stem cell proliferation|replicative senescence|	single-stranded DNA binding|protein binding|	10	0.9	22.4	22.4	9	0.4	3.72	3.72	0.8	23.9	0.00084	0.5	1.4	0.0480888	1	1	0
ENSMUSG00000043510	HSCB	HscB mitochondrial iron-sulfur cluster co-chaperone	cytoplasm|mitochondrion|mitochondrion|centrosome|plasma membrane|	protein folding|iron-sulfur cluster assembly|protein oligomerization|	molecular_function|protein binding|metal ion binding|chaperone binding|	7	0.8	22.8	22.8	7	0.4	2.09	2.09	0.8	23.9	0.00084	0.5	1.4	0.0480888	1	1	0
ENSMUSG00000013736	TRNT1	tRNA nucleotidyl transferase, CCA-adding, 1	intracellular|mitochondrion|	tRNA 3'-terminal CCA addition|protein targeting to mitochondrion|tRNA 3'-end processing|	tRNA binding|tRNA adenylyltransferase activity|ATP binding|CTP:tRNA cytidylyltransferase activity|CTP:3'-cytidine-tRNA cytidylyltransferase activity|ATP:3'-cytidine-cytidine-tRNA adenylyltransferase activity|	10	-1.9	24.6	-24.6	10	0.4	1.72	1.72	-1.9	23.9	0.00084	-3	-0.6	0.0480888	1	1	0
ENSMUSG00000022663	ATG3	autophagy related 3	cytoplasmic ubiquitin ligase complex|cytosol|	autophagic vacuole assembly|autophagic vacuole assembly|mitochondrion degradation|cellular protein modification process|protein targeting to membrane|protein ubiquitination|mitochondrial fragmentation involved in apoptotic process|nucleophagy|regulation of cilium assembly|	protein binding|Atg8 ligase activity|Atg8 ligase activity|Atg12 ligase activity|small conjugating protein ligase activity|enzyme binding|	10	0.9	13.2	13.2	10	0.8	11.1	11.1	0.9	23.8	0.00086	0.5	1.3	0.0488247	1	1	0
ENSMUSG00000035247	HECTD1	HECT domain containing E3 ubiquitin protein ligase 1	nucleus|cytoplasm|	neural tube closure|protein ubiquitination involved in ubiquitin-dependent protein catabolic process|	ubiquitin-protein transferase activity|protein binding|ligase activity|metal ion binding|	10	-1.1	15.7	-15.7	10	-1.1	8.48	-8.48	-1.1	23.8	0.00086	-1.9	-0.7	0.0488247	1	1	0
ENSMUSG00000008976	GABPA	GA binding protein transcription factor, alpha subunit 60kDa	nuclear chromatin|nucleus|	negative regulation of transcription from RNA polymerase II promoter|in utero embryonic development|transcription from RNA polymerase II promoter|cell differentiation|negative regulation of megakaryocyte differentiation|positive regulation of transcription from RNA polymerase II promoter|	RNA polymerase II core promoter proximal region sequence-specific DNA binding|RNA polymerase II core promoter proximal region sequence-specific DNA binding transcription factor activity involved in positive regulation of transcription|RNA polymerase II transcription regulatory region sequence-specific DNA binding transcription factor activity involved in positive regulation of transcription|DNA b…	10	0.6	16.9	16.9	10	0.7	7.5	7.5	0.6	23.8	0.00086	0.4	1	0.0488247	1	1	0
ENSMUSG00000036707	CAB39	calcium binding protein 39	cytosol|protein complex|extracellular vesicular exosome|	cell cycle arrest|insulin receptor signaling pathway|peptidyl-serine phosphorylation|peptidyl-threonine phosphorylation|signal transduction by phosphorylation|activation of protein kinase activity|intracellular signal transduction|protein heterooligomerization|cellular hypotonic response|positive regulation of protein serine/threonine kinase activity|negative regulation of potassium ion transmemb…	protein serine/threonine kinase activity|protein binding|kinase binding|protein kinase activator activity|protein serine/threonine kinase activator activity|	9	0.7	17	17	8	0.7	7.23	7.23	0.7	23.8	0.00086	0.5	1.1	0.0488247	1	1	0
ENSMUSG00000043535	SETX	senataxin	nucleus|nucleoplasm|nucleolus|cytoplasm|	double-strand break repair|termination of RNA polymerase II transcription|RNA processing|circadian rhythm|cell death|DNA duplex unwinding|	DNA binding|DNA helicase activity|ATP binding|	10	1.3	5.18	5.18	10	1.4	19	19	1.4	23.7	0.00087	1	2.4	0.0488511	1	1	0
ENSMUSG00000025132	ARHGDIA	Rho GDP dissociation inhibitor (GDI) alpha	immunological synapse|cytosol|cytoskeleton|extracellular vesicular exosome|	cellular component movement|negative regulation of cell adhesion|small GTPase mediated signal transduction|Rho protein signal transduction|regulation of protein localization|negative regulation of apoptotic process|positive regulation of GTPase activity|neurotrophin TRK receptor signaling pathway|regulation of axonogenesis|negative regulation of axonogenesis|positive regulation of axonogenesis|re…	Rho GDP-dissociation inhibitor activity|GTPase activator activity|protein binding|	10	1.1	13.2	13.2	9	1.2	10.9	10.9	1.1	23.7	0.00087	0.8	2	0.0488511	1	1	0
ENSMUSG00000031987	EGLN1	egl-9 family hypoxia-inducible factor 1	nucleus|cytoplasm|cytosol|	response to hypoxia|peptidyl-proline hydroxylation to 4-hydroxy-L-proline|negative regulation of cAMP catabolic process|oxygen homeostasis|negative regulation of sequence-specific DNA binding transcription factor activity|regulation of angiogenesis|negative regulation of cyclic-nucleotide phosphodiesterase activity|cardiac muscle tissue morphogenesis|oxidation-reduction process|heart trabecula fo…	iron ion binding|protein binding|enzyme binding|L-ascorbic acid binding|peptidyl-proline dioxygenase activity|peptidyl-proline 4-dioxygenase activity|	10	-1.7	18.5	-18.5	9	-1.2	6.57	-6.57	-1.5	23.7	0.00087	-2.4	-0.5	0.0488511	1	1	0
ENSMUSG00000040236	TRAPPC5	trafficking protein particle complex 5	endoplasmic reticulum|Golgi apparatus|TRAPP complex|	vesicle-mediated transport|	None	10	-1.3	19.6	-19.6	10	-1	4.92	-4.92	-1.2	23.7	0.00087	-1.7	-0.8	0.0488511	1	1	0
ENSMUSG00000078619	SMARCD2	SWI/SNF related, matrix associated, actin dependent regulator of chromatin, subfamily d, member 2	nuclear chromatin|nucleus|SWI/SNF complex|protein complex|	nucleosome disassembly|chromatin remodeling|transcription, DNA-templated|regulation of transcription from RNA polymerase II promoter|ATP-dependent chromatin remodeling|	RNA polymerase II core promoter proximal region sequence-specific DNA binding|RNA polymerase II distal enhancer sequence-specific DNA binding|transcription coactivator activity|protein binding|nucleosomal DNA binding|	10	1.6	9.46	9.46	10	1.8	14.8	14.8	1.7	23.6	0.00089	1.1	3.4	0.0494324	1	1	0
ENSMUSG00000029064	GNB1	guanine nucleotide binding protein (G protein), beta polypeptide 1	photoreceptor inner segment|intracellular|lysosomal membrane|heterotrimeric G-protein complex|plasma membrane|membrane|dendrite|photoreceptor outer segment membrane|cell body|extracellular vesicular exosome|photoreceptor disc membrane|	energy reserve metabolic process|GTP catabolic process|GTP catabolic process|signal transduction|adenylate cyclase-activating dopamine receptor signaling pathway|phospholipase C-activating G-protein coupled receptor signaling pathway|positive regulation of cytosolic calcium ion concentration|G-protein coupled acetylcholine receptor signaling pathway|Ras protein signal transduction|synaptic transm…	GTPase activity|signal transducer activity|protein binding|protein complex binding|GTPase binding|	10	1.4	12.9	12.9	9	0.8	12.1	12.1	0.8	23.6	0.00089	0.4	1.6	0.0494324	1	1	0
ENSMUSG00000003070	EFNA2	ephrin-A2	plasma membrane|anchored component of membrane|neuromuscular junction|perikaryon|	cell-cell signaling|axon guidance|olfactory bulb development|osteoclast differentiation|osteoclast differentiation|bone remodeling|bone remodeling|ephrin receptor signaling pathway|ephrin receptor signaling pathway|	ephrin receptor binding|	9	1.2	14.9	14.9	9	1	9.34	9.34	1.1	23.6	0.00089	0.8	1.8	0.0494324	1	1	0
ENSMUSG00000094628	GM3252	predicted gene 3252	None	None	None	7	1.8	26.5	26.5	7	0	0	0	1.8	23.6	0.00089	1.2	3	0.0494324	1	1	0
ENSMUSG00000018761	MPDU1	mannose-P-dolichol utilization defect 1	mitochondrion|endoplasmic reticulum|endoplasmic reticulum membrane|membrane|integral component of membrane|extracellular vesicular exosome|	protein folding|dolichol-linked oligosaccharide biosynthetic process|transport|oligosaccharide biosynthetic process|oligosaccharide biosynthetic process|	None	10	-1	17	-17	10	-1	6.88	-6.88	-1	23.5	0.00092	-1.6	-0.6	0.0505507	1	0	0
ENSMUSG00000026856	DOLPP1	dolichyldiphosphatase 1	endoplasmic reticulum membrane|integral component of endoplasmic reticulum membrane|integral component of endoplasmic reticulum membrane|	protein N-linked glycosylation|protein N-linked glycosylation|dolichol-linked oligosaccharide biosynthetic process|dolichyl diphosphate biosynthetic process|lipid biosynthetic process|protein N-linked glycosylation via asparagine|post-translational protein modification|cellular protein metabolic process|	dolichyldiphosphatase activity|dolichyldiphosphatase activity|	10	-0.9	19.9	-19.9	10	-1.8	5.12	-5.12	-0.9	23.5	0.00092	-1.7	-0.5	0.0505507	1	0	0
ENSMUSG00000005370	MSH6	mutS homolog 6	nuclear chromosome|nuclear chromatin|nucleus|cytoplasm|Golgi apparatus|plasma membrane|MutSalpha complex|intracellular membrane-bounded organelle|	meiotic mismatch repair|meiotic mismatch repair|ATP catabolic process|ATP catabolic process|DNA repair|mismatch repair|mismatch repair|mismatch repair|reciprocal meiotic recombination|determination of adult lifespan|intrinsic apoptotic signaling pathway in response to DNA damage|intrinsic apoptotic signaling pathway in response to DNA damage|response to UV|response to UV|somatic hypermutation of …	magnesium ion binding|four-way junction DNA binding|chromatin binding|double-stranded DNA binding|protein binding|protein binding|ATP binding|DNA-dependent ATPase activity|ATPase activity|mismatched DNA binding|mismatched DNA binding|guanine/thymine mispair binding|single guanine insertion binding|single thymine insertion binding|oxidized purine DNA binding|MutLalpha complex binding|methylated hi…	10	-1.4	17.8	-17.8	10	-1.3	6.03	-6.03	-1.4	23.4	0.00099	-2.1	-0.9	0.0541068	1	0	0
ENSMUSG00000035354	UVRAG	UV radiation resistance associated	cytoplasm|lysosome|early endosome|late endosome|protein complex|	DNA repair|positive regulation of autophagy|	protein binding|SH3 domain binding|	10	-2.1	20.3	-20.3	10	-0.8	5.81	-5.81	-0.9	23.4	0.00099	-2.6	-0.7	0.0541068	1	0	0
ENSMUSG00000020964	SEL1L	sel-1 suppressor of lin-12-like (C. elegans)	endoplasmic reticulum membrane|integral component of membrane|	Notch signaling pathway|response to endoplasmic reticulum stress|	protein binding|	9	-0.9	20	-20	9	-0.6	4.2	-4.2	-0.9	23.4	0.00099	-1.4	-0.6	0.0541068	1	0	0
ENSMUSG00000071256	ZFP213	zinc finger protein 213	cellular_component|nucleus|	transcription, DNA-templated|regulation of transcription, DNA-templated|biological_process|	molecular_function|DNA binding|metal ion binding|	10	-0.9	14.2	-14.2	10	-1.2	10.4	-10.4	-1	23.3	0.00101	-1.6	-0.6	0.0547618	1	0	0
ENSMUSG00000027303	PTPRA	protein tyrosine phosphatase, receptor type, A	plasma membrane|integral component of plasma membrane|receptor complex|extracellular vesicular exosome|	protein phosphorylation|axon guidance|insulin receptor signaling pathway|peptidyl-tyrosine dephosphorylation|peptidyl-tyrosine dephosphorylation|	protein tyrosine phosphatase activity|transmembrane receptor protein tyrosine phosphatase activity|protein binding|	10	1.6	16.3	16.3	10	1.1	8.81	8.81	1.4	23.3	0.00101	0.9	2.3	0.0547618	1	0	0
ENSMUSG00000029352	CRYBB3	crystallin, beta B3	None	visual perception|	structural constituent of eye lens|	10	-1.9	22.3	-22.3	10	-0.7	2.81	-2.81	-1.9	23.3	0.00101	-3	-1.2	0.0547618	1	0	0
ENSMUSG00000024026	GLO1	glyoxalase I	cytoplasm|extracellular vesicular exosome|	carbohydrate metabolic process|regulation of transcription from RNA polymerase II promoter|glutathione metabolic process|methylglyoxal metabolic process|osteoclast differentiation|negative regulation of apoptotic process|negative regulation of apoptotic process|negative regulation of apoptotic process|	lactoylglutathione lyase activity|zinc ion binding|	10	-1.9	22.6	-22.6	10	-1.6	1.42	-1.42	-1.9	23.3	0.00101	-3	-1.3	0.0547618	1	0	0
ENSMUSG00000036398	PPP1R11	protein phosphatase 1, regulatory (inhibitor) subunit 11	cytoplasm|	negative regulation of catalytic activity|	protein phosphatase inhibitor activity|protein binding|	8	1	12	12	8	0.9	11.7	11.7	0.9	23.2	0.00101	0.5	1.4	0.0547618	1	0	0
ENSMUSG00000020149	RAB1	RAB1, member RAS oncogene family	Golgi membrane|intracellular|cell|cytoplasm|endosome|early endosome|endoplasmic reticulum|endoplasmic reticulum membrane|Golgi apparatus|membrane|melanosome|neuronal cell body|extracellular vesicular exosome|	autophagic vacuole assembly|GTP catabolic process|transport|intracellular protein transport|ER to Golgi vesicle-mediated transport|ER to Golgi vesicle-mediated transport|endocytosis|autophagy|small GTPase mediated signal transduction|protein transport|vesicle-mediated transport|cell migration|cell migration|growth hormone secretion|melanosome transport|substrate adhesion-dependent cell spreading|…	nucleotide binding|GTPase activity|protein binding|GTP binding|	10	-0.9	12.6	-12.6	10	-1	11.1	-11.1	-0.9	23.2	0.00101	-1.5	-0.6	0.0547618	1	0	0
ENSMUSG00000058239	USF2	upstream transcription factor 2, c-fos interacting	nucleus|	regulation of transcription from RNA polymerase II promoter by glucose|positive regulation of transcription from RNA polymerase II promoter by glucose|positive regulation of transcription from RNA polymerase II promoter by glucose|transcription, DNA-templated|transcription from RNA polymerase II promoter|lactation|late viral transcription|positive regulation of transcription from RNA polymerase I…	RNA polymerase II core promoter proximal region sequence-specific DNA binding|double-stranded DNA binding|sequence-specific DNA binding transcription factor activity|RNA polymerase II distal enhancer sequence-specific DNA binding transcription factor activity|protein binding|protein homodimerization activity|bHLH transcription factor binding|sequence-specific DNA binding|protein heterodimerizatio…	10	0.8	14.1	14.1	9	0.8	9.51	9.51	0.8	23.2	0.00101	0.5	1.3	0.0547618	1	0	0
ENSMUSG00000037466	4930427A07RIK	RIKEN cDNA 4930427A07 gene	cellular_component|	biological_process|	molecular_function|	10	-1.5	14.7	-14.7	10	-1.8	9.12	-9.12	-1.5	23.2	0.00101	-2.6	-0.9	0.0547618	1	0	0
ENSMUSG00000020516	RPS6KB1	ribosomal protein S6 kinase, 70kDa, polypeptide 1	nucleus|cytoplasm|mitochondrion|mitochondrial outer membrane|cytosol|cell surface|cell junction|neuron projection|synapse|perinuclear region of cytoplasm|	G1/S transition of mitotic cell cycle|skeletal muscle contraction|protein phosphorylation|protein phosphorylation|apoptotic process|signal transduction|germ cell development|aging|response to nutrient|long-term memory|insulin receptor signaling pathway|response to heat|response to wounding|response to mechanical stimulus|response to toxic substance|response to glucose|skeletal muscle atrophy|resp…	protein kinase activity|ribosomal protein S6 kinase activity|protein serine/threonine/tyrosine kinase activity|protein binding|ATP binding|peptide binding|	9	0.8	17.2	17.2	9	0.6	6.59	6.59	0.8	23.2	0.00101	0.5	1.3	0.0547618	1	0	0
ENSMUSG00000079389	GM3149	predicted gene 3149	cellular_component|	biological_process|	molecular_function|	10	0.9	6.71	6.71	10	1.1	17.2	17.2	1	23.1	0.00103	0.7	1.6	0.0545474	1	0	0
ENSMUSG00000043445	PGP	phosphoglycolate phosphatase	None	carbohydrate metabolic process|dephosphorylation|peptidyl-tyrosine dephosphorylation|	magnesium ion binding|protein tyrosine phosphatase activity|phosphoglycolate phosphatase activity|nucleotide phosphatase activity, acting on free nucleotides|	10	0.5	13.9	13.9	10	0.7	10.1	10.1	0.6	23.1	0.00103	0.4	1	0.0545474	1	0	0
ENSMUSG00000050675	GP1BA	glycoprotein Ib (platelet), alpha polypeptide	plasma membrane|plasma membrane|integral component of plasma membrane|membrane|anchored component of external side of plasma membrane|	cell morphogenesis|cell adhesion|cell surface receptor signaling pathway|blood coagulation|blood coagulation|blood coagulation, intrinsic pathway|platelet activation|regulation of blood coagulation|fibrinolysis|thrombin receptor signaling pathway|	protein binding|thrombin receptor activity|	10	0.7	14	14	10	0.7	9.53	9.53	0.7	23.1	0.00103	0.5	1.2	0.0545474	1	0	0
ENSMUSG00000032905	ATG12	autophagy related 12	pre-autophagosomal structure membrane|pre-autophagosomal structure membrane|Atg12-Atg5-Atg16 complex|	autophagic vacuole assembly|autophagic vacuole assembly|mitochondrion degradation|C-terminal protein lipidation|cellular response to nitrogen starvation|negative regulation of type I interferon production|nucleophagy|innate immune response|	protein binding|Atg8 ligase activity|	10	0.9	16.1	16.1	10	1.4	8.45	8.45	1	23.1	0.00103	0.6	1.8	0.0545474	1	0	0
ENSMUSG00000072889	NFXL1	nuclear transcription factor, X-box binding-like 1	nucleus|membrane|integral component of membrane|	regulation of transcription, DNA-templated|	sequence-specific DNA binding transcription factor activity|zinc ion binding|	10	-1.9	24.3	-24.3	10	0.3	1.57	1.57	-1.9	23.1	0.00103	-3	-0.6	0.0545474	1	0	0
ENSMUSG00000020496	RNF187	ring finger protein 187	nucleus|cytoplasm|	positive regulation of cell proliferation|proteasome-mediated ubiquitin-dependent protein catabolic process|positive regulation of transcription, DNA-templated|protein autoubiquitination|protein K48-linked ubiquitination|	ubiquitin-protein transferase activity|protein binding|zinc ion binding|ligase activity|	10	-0.9	12.4	-12.4	10	-2.5	16.8	-16.8	-1.9	23	0.00107	-3.2	-0.8	0.055943	1	0	0
ENSMUSG00000090996	GM20458	N/A	None	None	None	10	-0.7	18	-18	10	-0.7	5.43	-5.43	-0.7	23	0.00107	-1.4	-0.5	0.055943	1	0	0
ENSMUSG00000029283	CDC7	cell division cycle 7	nucleus|nucleoplasm|cytoplasm|microtubule cytoskeleton|intercellular bridge|	G1/S transition of mitotic cell cycle|mitotic cell cycle|DNA replication|protein phosphorylation|positive regulation of cell proliferation|positive regulation of nuclear cell cycle DNA replication|positive regulation of G2/M transition of mitotic cell cycle|cell cycle phase transition|cell division|	protein kinase activity|protein serine/threonine kinase activity|protein binding|ATP binding|kinase activity|metal ion binding|	10	1.8	9.77	9.77	9	2.1	14	14	2	22.9	0.00111	1.6	3.8	0.0577397	1	0	0
ENSMUSG00000042903	FOXO4	forkhead box O4	nucleus|nucleus|nucleoplasm|cytoplasm|cytosol|cytosol|	regulation of transcription, DNA-templated|transcription from RNA polymerase II promoter|cell cycle arrest|mitotic G2 DNA damage checkpoint|epidermal growth factor receptor signaling pathway|muscle organ development|negative regulation of cell proliferation|insulin receptor signaling pathway|fibroblast growth factor receptor signaling pathway|negative regulation of angiogenesis|Fc-epsilon recepto…	DNA binding|sequence-specific DNA binding transcription factor activity|protein binding|transcription factor binding|enzyme binding|sequence-specific DNA binding|	10	-0.7	12.1	-12.1	10	-1.2	12	-12	-0.9	22.9	0.00111	-1.5	-0.5	0.0577397	1	0	0
ENSMUSG00000040659	EFHD2	EF-hand domain family, member D2	membrane raft|	None	calcium ion binding|	10	1.2	3.38	3.38	10	2.1	21.3	21.3	1.9	22.8	0.00116	1.2	3.9	0.0600359	1	0	0
ENSMUSG00000061613	U2AF1	U2 small nuclear RNA auxiliary factor 1	nucleus|nucleoplasm|spliceosomal complex|Cajal body|nuclear speck|catalytic step 2 spliceosome|	mRNA splicing, via spliceosome|mRNA splicing, via spliceosome|transcription from RNA polymerase II promoter|termination of RNA polymerase II transcription|mRNA processing|mRNA export from nucleus|RNA splicing|gene expression|mRNA 3'-end processing|	nucleotide binding|protein binding|poly(A) RNA binding|metal ion binding|RS domain binding|	7	0.8	2.92	2.92	7	1.1	21	21	1	22.8	0.00116	0.6	2	0.0600359	1	0	0
ENSMUSG00000069306	HIST1H4M	histone cluster 1, H4m	nuclear chromosome|nucleus|membrane|protein complex|extracellular vesicular exosome|	DNA replication-dependent nucleosome assembly|DNA replication-independent nucleosome assembly|negative regulation of megakaryocyte differentiation|	poly(A) RNA binding|	10	1.5	14.6	14.6	8	1.6	8.69	8.69	1.5	22.8	0.00116	1	2.6	0.0600359	1	0	0
ENSMUSG00000047686	ZCCHC5	zinc finger, CCHC domain containing 5	None	None	nucleic acid binding|zinc ion binding|	10	-0.6	6.85	-6.85	10	-1	17.1	-17.1	-0.9	22.7	0.00124	-1.8	-0.6	0.0636937	1	0	0
ENSMUSG00000033014	TRIM33	tripartite motif containing 33	nucleus|nucleoplasm|intracellular membrane-bounded organelle|	negative regulation of transcription from RNA polymerase II promoter|transcription, DNA-templated|transcription initiation from RNA polymerase II promoter|transforming growth factor beta receptor signaling pathway|gene expression|protein ubiquitination|protein ubiquitination|regulation of transforming growth factor beta receptor signaling pathway|negative regulation of BMP signaling pathway|negat…	DNA binding|ubiquitin-protein transferase activity|protein binding|zinc ion binding|ligase activity|co-SMAD binding|R-SMAD binding|	8	-1.1	7.05	-7.05	8	-1.7	17	-17	-1.2	22.7	0.00124	-2.4	-0.7	0.0636937	1	0	0
ENSMUSG00000025588	NAT1	N-acetyltransferase 1 (arylamine N-acetyltransferase)	cytosol|	xenobiotic metabolic process|small molecule metabolic process|	arylamine N-acetyltransferase activity|	10	-1.1	19.2	-19.2	10	-1	3.85	-3.85	-1.1	22.7	0.00124	-1.7	-0.7	0.0636937	1	0	0
ENSMUSG00000034342	CBL	Cbl proto-oncogene, E3 ubiquitin protein ligase	nucleus|cytoplasm|cytosol|plasma membrane|plasma membrane|flotillin complex|	regulation of transcription, DNA-templated|cell surface receptor signaling pathway|epidermal growth factor receptor signaling pathway|transforming growth factor beta receptor signaling pathway|fibroblast growth factor receptor signaling pathway|positive regulation of phosphatidylinositol 3-kinase signaling|protein ubiquitination|protein ubiquitination|negative regulation of epidermal growth facto…	phosphotyrosine binding|sequence-specific DNA binding transcription factor activity|ubiquitin-protein transferase activity|signal transducer activity|calcium ion binding|protein binding|zinc ion binding|ligase activity|SH3 domain binding|ephrin receptor binding|	9	-2	20.5	-20.5	9	-1.3	3.75	-3.75	-2	22.7	0.00124	-3.4	-0.9	0.0636937	1	0	0
ENSMUSG00000042659	ARRDC4	arrestin domain containing 4	endosome|plasma membrane|	positive regulation of ubiquitin-protein transferase activity|	None	10	1.1	3.68	3.68	10	2	20.9	20.9	1.8	22.6	0.00127	0.8	3.6	0.0645872	1	0	0
ENSMUSG00000033653	VPS8	vacuolar protein sorting 8 homolog (S. cerevisiae)	None	None	zinc ion binding|	10	-1	23.7	-23.7	10	-0.4	1.23	-1.23	-0.9	22.6	0.00127	-1.6	-0.6	0.0645872	1	0	0
ENSMUSG00000021670	HMGCR	3-hydroxy-3-methylglutaryl-CoA reductase	peroxisomal membrane|endoplasmic reticulum|endoplasmic reticulum membrane|integral component of membrane|	cholesterol biosynthetic process|ubiquinone metabolic process|aging|response to nutrient|isoprenoid biosynthetic process|visual learning|embryo development|negative regulation of striated muscle cell apoptotic process|positive regulation of cardiac muscle cell apoptotic process|coenzyme A metabolic process|positive regulation of stress-activated MAPK cascade|negative regulation of MAP kinase acti…	hydroxymethylglutaryl-CoA reductase (NADPH) activity|protein binding|hydroxymethylglutaryl-CoA reductase activity|protein homodimerization activity|coenzyme binding|NADPH binding|	9	0.6	2.63	2.63	8	1.9	23.5	23.5	1.8	22.5	0.00129	0.7	3.6	0.0652804	1	0	0
ENSMUSG00000022568	SCRIB	scribbled planar cell polarity protein	plasma membrane|plasma membrane|cell-cell junction|cell-cell adherens junction|basolateral plasma membrane|lamellipodium|cell leading edge|Scrib-APC-beta-catenin complex|myelin sheath abaxonal region|presynaptic membrane|postsynaptic membrane|extracellular vesicular exosome|	neural tube closure|positive regulation of receptor recycling|asymmetric protein localization|cell proliferation|viral process|synaptic vesicle targeting|single organismal cell-cell adhesion|cell migration|activation of Rac GTPase activity|establishment of apical/basal cell polarity|wound healing|positive regulation of apoptotic process|astrocyte cell migration|negative regulation of mitotic cell…	protein binding|	10	0.8	7.02	7.02	10	1.9	19.5	19.5	0.8	22.5	0.00129	0.5	3	0.0652804	1	0	0
ENSMUSG00000005378	WBSCR22	Williams Beuren syndrome chromosome region 22	cellular_component|nucleus|cytoplasm|	transcription, DNA-templated|regulation of transcription, DNA-templated|rRNA processing|biological_process|chromatin modification|methylation|methylation|	methyltransferase activity|poly(A) RNA binding|	9	-0.9	14.1	-14.1	9	-0.9	8.82	-8.82	-0.9	22.5	0.00129	-1.4	-0.6	0.0652804	1	0	0
ENSMUSG00000027291	VPS39	vacuolar protein sorting 39 homolog (S. cerevisiae)	lysosomal membrane|HOPS complex|late endosome membrane|	intracellular protein transport|vesicle-mediated transport|regulation of catalytic activity|	small GTPase regulator activity|	10	-1	19.7	-19.7	10	-0.7	4.01	-4.01	-0.9	22.5	0.00129	-1.4	-0.5	0.0652804	1	0	0
ENSMUSG00000094634	GM3468	predicted gene 3468	None	None	None	8	1.8	25.6	25.6	8	0	0	0	1.8	22.5	0.00129	1.1	3	0.0652804	1	0	0
ENSMUSG00000051811	COX6B2	cytochrome c oxidase subunit VIb polypeptide 2 (testis)	mitochondrial intermembrane space|mitochondrial crista|	hydrogen ion transmembrane transport|	cytochrome-c oxidase activity|	9	-0.8	6.31	-6.31	9	-2	19.8	-19.8	-1.8	22.3	0.00134	-3.1	-0.9	0.0669837	1	0	0
ENSMUSG00000095976	GM5891	predicted gene 5891	cellular_component|	biological_process|	molecular_function|	10	0.7	12.6	12.6	10	0.7	10.2	10.2	0.7	22.3	0.00134	0.4	1.2	0.0669837	1	0	0
ENSMUSG00000095683	GM10662	predicted gene 10662	cellular_component|	biological_process|	molecular_function|	10	0.7	12.6	12.6	10	0.7	10.2	10.2	0.7	22.3	0.00134	0.4	1.2	0.0669837	1	0	0
ENSMUSG00000034390	CMIP	c-Maf inducing protein	nucleus|cytoplasm|	None	protein binding|	10	0.7	16	16	10	0.7	6.7	6.7	0.7	22.3	0.00134	0.4	1.1	0.0669837	1	0	0
ENSMUSG00000005615	PCYT1A	phosphate cytidylyltransferase 1, choline, alpha	endoplasmic reticulum membrane|endoplasmic reticulum membrane|cytosol|glycogen granule|	phospholipid metabolic process|phosphatidylcholine biosynthetic process|phosphatidylcholine biosynthetic process|CDP-choline pathway|small molecule metabolic process|glycerophospholipid biosynthetic process|	choline-phosphate cytidylyltransferase activity|lipid binding|protein homodimerization activity|	7	0.9	18.6	18.6	7	0.6	5.35	5.35	0.9	22.3	0.00134	0.5	1.4	0.0669837	1	0	0
ENSMUSG00000031070	MRGPRF	MAS-related GPR, member F	plasma membrane|integral component of membrane|extracellular vesicular exosome|	G-protein coupled receptor signaling pathway|	G-protein coupled receptor activity|	10	1.9	19.5	19.5	10	1.3	4.36	4.36	1.8	22.3	0.00134	1.3	3	0.0669837	1	0	0
ENSMUSG00000061589	DOT1L	DOT1-like histone H3K79 methyltransferase	nucleus|	histone lysine methylation|histone lysine methylation|regulation of JAK-STAT cascade|regulation of transcription regulatory region DNA binding|	DNA binding|protein binding|transcription factor binding|histone-lysine N-methyltransferase activity|	10	-1	21.2	-21.2	10	-0.5	3.53	-3.53	-0.8	22.3	0.00134	-1.3	-0.4	0.0669837	1	0	0
ENSMUSG00000037416	DMXL1	Dmx-like 1	None	None	None	10	-0.9	19.5	-19.5	10	-0.8	3.25	-3.25	-0.9	22.3	0.00134	-1.4	-0.5	0.0669837	1	0	0
ENSMUSG00000003068	STK11	serine/threonine kinase 11	nucleus|cytoplasm|mitochondrion|cytosol|cytosol|membrane|TCR signalosome|extracellular vesicular exosome|	regulation of cell growth|tissue homeostasis|vasculature development|energy reserve metabolic process|protein phosphorylation|autophagy|cellular response to DNA damage stimulus|cell cycle arrest|cell cycle arrest|spermatid development|axonogenesis|negative regulation of cell proliferation|insulin receptor signaling pathway|response to ionizing radiation|establishment of cell polarity|regulation o…	magnesium ion binding|p53 binding|protein serine/threonine kinase activity|protein serine/threonine kinase activity|protein binding|ATP binding|LRR domain binding|protein kinase activator activity|protein complex binding|	8	1	10.2	10.2	8	1.8	15.2	15.2	1.6	22.2	0.00138	0.7	2.8	0.0676629	1	0	0
ENSMUSG00000020608	SMC6	structural maintenance of chromosomes 6	chromosome, telomeric region|intracellular|nucleus|nucleolus|PML body|Smc5-Smc6 complex|	telomere maintenance via recombination|double-strand break repair via homologous recombination|cellular senescence|	protein binding|ATP binding|	10	0.8	18.4	18.4	9	1.4	6.03	6.03	0.8	22.2	0.00138	0.5	1.6	0.0676629	1	0	0
ENSMUSG00000068328	AUP1	ancient ubiquitous protein 1	endoplasmic reticulum membrane|membrane|integral component of membrane|	None	protein binding|	10	-0.6	14.2	-14.2	10	-1.7	12.8	-12.8	-0.8	22.1	0.00142	-1.9	-0.5	0.0692926	1	0	0
ENSMUSG00000024271	ELP2	elongator acetyltransferase complex subunit 2	nucleolus|cytoplasm|cytoplasm|transcription elongation factor complex|DNA-directed RNA polymerase II, holoenzyme|Elongator holoenzyme complex|	chromatin organization|regulation of transcription from RNA polymerase II promoter|transcription elongation from RNA polymerase II promoter|regulation of JAK-STAT cascade|	DNA binding|protein kinase binding|	9	1.4	13.9	13.9	9	0.8	10.6	10.6	1.3	22.1	0.00142	0.8	2.1	0.0692926	1	0	0
ENSMUSG00000049489	FAM58B	family with sequence similarity 58, member B	cellular_component|	regulation of cyclin-dependent protein serine/threonine kinase activity|regulation of transcription, DNA-templated|positive regulation of MAPK cascade|positive regulation of protein kinase activity|	protein binding|protein kinase binding|protein kinase activator activity|	10	0.7	19.2	19.2	10	0.7	3.3	3.3	0.7	22.1	0.00142	0.5	1.3	0.0692926	1	0	0
ENSMUSG00000049796	CRH	corticotropin releasing hormone	extracellular region|extracellular space|cytoplasm|varicosity|perikaryon|	positive regulation of protein phosphorylation|synaptic transmission, dopaminergic|glucocorticoid biosynthetic process|inflammatory response|signal transduction|synaptic transmission|female pregnancy|parturition|learning or memory|long-term memory|feeding behavior|positive regulation of cell proliferation|associative learning|hormone-mediated apoptotic signaling pathway|positive regulation of gen…	receptor binding|hormone activity|neuropeptide hormone activity|protein binding|corticotropin-releasing hormone activity|corticotropin-releasing hormone receptor 1 binding|corticotropin-releasing hormone receptor 2 binding|	10	2	22.2	22.2	10	-0.7	2.74	-2.74	2	22.1	0.00142	1.6	4	0.0692926	1	0	0
ENSMUSG00000092167	GM3696	predicted gene 3696	cellular_component|	biological_process|	molecular_function|	10	1.8	25.2	25.2	9	-1	1.92	-1.92	1.8	22.1	0.00142	1.1	3	0.0692926	1	0	0
ENSMUSG00000032096	ARCN1	archain 1	cytoplasm|endoplasmic reticulum|Golgi apparatus|cytosol|membrane|COPI vesicle coat|clathrin adaptor complex|intracellular membrane-bounded organelle|	intracellular protein transport|retrograde vesicle-mediated transport, Golgi to ER|adult locomotory behavior|cerebellar Purkinje cell layer maturation|pigmentation|COPI coating of Golgi vesicle|membrane organization|	poly(A) RNA binding|	6	-1.4	23.1	-23.1	6	-0.6	0.154	-0.154	-1.4	22.1	0.00142	-2.4	-0.8	0.0692926	1	0	0
ENSMUSG00000052293	TAF9	TAF9 RNA polymerase II, TATA box binding protein (TBP)-associated factor, 32kDa	PCAF complex|nucleoplasm|transcription factor TFIID complex|STAGA complex|transcription factor TFTC complex|pre-snoRNP complex|MLL1 complex|	chromatin organization|transcription from RNA polymerase II promoter|transcription initiation from RNA polymerase II promoter|transcription elongation from RNA polymerase II promoter|cellular response to DNA damage stimulus|gene expression|viral process|positive regulation of cell growth|negative regulation of proteasomal ubiquitin-dependent protein catabolic process|negative regulation of apopto…	p53 binding|DNA binding|transcription coactivator activity|transcription coactivator activity|histone acetyltransferase activity|protein binding|activating transcription factor binding|transcription regulatory region DNA binding|protein heterodimerization activity|C2H2 zinc finger domain binding|	10	-1.8	15.2	-15.2	10	1.5	20.9	20.9	1.5	22	0.00144	0.9	2.6	0.0692789	1	0	0
ENSMUSG00000037845	FDXACB1	ferredoxin-fold anticodon binding domain containing 1	None	phenylalanyl-tRNA aminoacylation|tRNA processing|	tRNA binding|magnesium ion binding|phenylalanine-tRNA ligase activity|ATP binding|	10	-0.9	10.7	-10.7	10	-1.8	14.7	-14.7	-1.1	22	0.00144	-2.4	-0.7	0.0692789	1	0	0
ENSMUSG00000040506	AMBRA1	autophagy/beclin-1 regulator 1	cytoplasm|autophagic vacuole|axoneme|cytoplasmic vesicle|	autophagy|negative regulation of cell proliferation|neural tube development|cell differentiation|negative regulation of neuron apoptotic process|	protein binding|	10	-0.5	13.3	-13.3	10	-1.5	12	-12	-0.9	22	0.00144	-1.6	-0.4	0.0692789	1	0	0
ENSMUSG00000003037	RAB8A	RAB8A, member RAS oncogene family	Golgi membrane|centrosome|plasma membrane|cilium|cilium|postsynaptic density|dendrite|cytoplasmic vesicle membrane|phagocytic vesicle membrane|nonmotile primary cilium|neuronal cell body|phagocytic vesicle|recycling endosome membrane|extracellular vesicular exosome|	G2/M transition of mitotic cell cycle|mitotic cell cycle|GTP catabolic process|vesicle docking involved in exocytosis|small GTPase mediated signal transduction|axonogenesis|protein transport|cellular response to insulin stimulus|cilium assembly|cilium assembly|regulation of long-term neuronal synaptic plasticity|Golgi vesicle fusion to target membrane|regulation of protein transport|membrane orga…	GTPase activity|protein binding|GTP binding|Rab GTPase binding|GDP binding|protein kinase binding|	10	-0.6	13.6	-13.6	10	-1.1	9.63	-9.63	-0.8	22	0.00144	-1.5	-0.5	0.0692789	1	0	0
ENSMUSG00000001847	RAC1	ras-related C3 botulinum toxin substrate 1 (rho family, small GTP binding protein Rac1)	Golgi membrane|phagocytic cup|trans-Golgi network|cytosol|cytosol|plasma membrane|membrane|extrinsic component of plasma membrane|lamellipodium|ruffle membrane|cytoplasmic ribonucleoprotein granule|melanosome|extracellular vesicular exosome|	positive regulation of protein phosphorylation|auditory receptor cell morphogenesis|mast cell chemotaxis|epithelial cell morphogenesis|GTP catabolic process|cellular component movement|inflammatory response|hyperosmotic response|cell adhesion|cell-matrix adhesion|small GTPase mediated signal transduction|axon guidance|blood coagulation|cell proliferation|response to wounding|anatomical structure …	GTPase activity|protein binding|GTP binding|Rab GTPase binding|enzyme binding|protein kinase binding|GTP-dependent protein binding|thioesterase binding|Rho GDP-dissociation inhibitor binding|	10	1.7	14	14	10	1.7	8.43	8.43	1.7	22	0.00144	1.2	2.8	0.0692789	1	0	0
ENSMUSG00000020198	AP3D1	adaptor-related protein complex 3, delta 1 subunit	Golgi membrane|lysosomal membrane|Golgi apparatus|endosome membrane|membrane|membrane coat|terminal bouton|	eye pigment biosynthetic process|intracellular protein transport|anterograde axon cargo transport|melanosome organization|protein localization to organelle|endosome to melanosome transport|antigen processing and presentation, exogenous lipid antigen via MHC class Ib|anterograde synaptic vesicle transport|synaptic vesicle membrane organization|positive regulation of NK T cell differentiation|regul…	transporter activity|protein transporter activity|	10	-0.8	20.2	-20.2	10	-0.7	2.24	-2.24	-0.8	22	0.00144	-1.3	-0.5	0.0692789	1	0	0
ENSMUSG00000027570	COL9A3	collagen, type IX, alpha 3	extracellular region|collagen type IX trimer|endoplasmic reticulum lumen|	axon guidance|male gonad development|female gonad development|extracellular matrix disassembly|extracellular matrix organization|collagen catabolic process|	extracellular matrix structural constituent conferring tensile strength|	9	-0.6	11.4	-11.4	9	-1.1	11.8	-11.8	-0.9	21.9	0.00149	-1.5	-0.5	0.0706888	1	0	0
ENSMUSG00000025025	MXI1	MAX interactor 1, dimerization protein	nucleus|nucleolus|cytoplasm|	negative regulation of transcription from RNA polymerase II promoter|transcription, DNA-templated|negative regulation of cell proliferation|cytoplasmic sequestering of transcription factor|	DNA binding|transcription corepressor activity|protein dimerization activity|	10	-0.6	15.8	-15.8	10	-0.8	7.09	-7.09	-0.7	21.9	0.00149	-1.4	-0.4	0.0706888	1	0	0
ENSMUSG00000020671	RAB10	RAB10, member RAS oncogene family	exocyst|endosome|endoplasmic reticulum membrane|Golgi apparatus|trans-Golgi network|plasma membrane|cytoplasmic vesicle membrane|phagocytic vesicle membrane|insulin-responsive compartment|recycling endosome|recycling endosome membrane|extracellular vesicular exosome|endoplasmic reticulum tubular network|primary cilium|	GTP catabolic process|Golgi to plasma membrane transport|small GTPase mediated signal transduction|axonogenesis|vesicle-mediated transport|endosomal transport|antigen processing and presentation|polarized epithelial cell differentiation|cellular response to insulin stimulus|Golgi to plasma membrane protein transport|establishment of neuroblast polarity|membrane organization|basolateral protein lo…	GTPase activity|GTP binding|GDP binding|myosin V binding|	10	-0.6	16	-16	10	-0.7	6.34	-6.34	-0.7	21.9	0.00149	-1.2	-0.4	0.0706888	1	0	0
ENSMUSG00000069300	HIST1H2BJ	histone cluster 1, H2bj	nucleosome|extracellular space|nucleus|nucleoplasm|	innate immune response in mucosa|chromatin organization|nucleosome assembly|antibacterial humoral response|defense response to Gram-positive bacterium|	DNA binding|protein heterodimerization activity|	8	0.7	19.3	19.3	8	0.5	3.4	3.4	0.7	21.9	0.00149	0.5	1.2	0.0706888	1	0	0
ENSMUSG00000015002	EFR3A	EFR3 homolog A (S. cerevisiae)	intracellular|plasma membrane|extracellular vesicular exosome|	None	None	10	-1.9	22.3	-22.3	10	-0.4	0.68	-0.68	-1.9	21.9	0.00149	-3	-1.3	0.0706888	1	0	0
ENSMUSG00000097341	GM26616	N/A	None	None	None	9	-1.4	9.92	-9.92	8	-1.5	12.3	-12.3	-1.4	21.8	0.00152	-2.4	-1	0.071287	1	0	0
ENSMUSG00000021811	DNAJC9	DnaJ (Hsp40) homolog, subfamily C, member 9	nucleus|	social behavior|	None	6	0.7	15	15	4	1.6	10.7	10.7	1.2	21.8	0.00152	0.5	2.2	0.071287	1	0	0
ENSMUSG00000051956	RNF133	ring finger protein 133	endoplasmic reticulum membrane|integral component of membrane|	protein autoubiquitination|	zinc ion binding|ligase activity|	10	-1.8	22.6	-22.6	10	-0.5	1.51	-1.51	-1.8	21.8	0.00152	-3	-0.9	0.071287	1	0	0
ENSMUSG00000067825	PEX26	peroxisomal biogenesis factor 26	peroxisome|integral component of peroxisomal membrane|	protein import into peroxisome matrix|protein import into peroxisome matrix|protein import into peroxisome membrane|	protein binding|protein C-terminus binding|protein complex binding|ATPase binding|	10	-0.6	9.91	-9.91	10	-1.7	16	-16	-0.7	21.7	0.00161	-1.9	-0.4	0.0749931	1	0	0
ENSMUSG00000040034	NUP43	nucleoporin 43kDa	kinetochore|condensed chromosome kinetochore|nuclear envelope|cytosol|nuclear pore outer ring|nuclear pore outer ring|	mitotic cell cycle|carbohydrate metabolic process|chromosome segregation|mitotic nuclear division|mitotic nuclear envelope disassembly|hexose transport|regulation of glucose transport|protein transport|glucose transport|viral process|cytokine-mediated signaling pathway|small molecule metabolic process|mRNA transport|transmembrane transport|	protein binding|	8	1.4	12.9	12.9	9	2.2	12.1	12.1	2	21.7	0.00161	0.6	3	0.0749931	1	0	0
ENSMUSG00000033096	APMAP	adipocyte plasma membrane associated protein	cell surface|membrane|integral component of membrane|extracellular vesicular exosome|	biological_process|biosynthetic process|	arylesterase activity|strictosidine synthase activity|	10	-1.4	13	-13	10	-1.4	9.13	-9.13	-1.4	21.7	0.00161	-1.9	-0.6	0.0749931	1	0	0
ENSMUSG00000090631	OLFR456	olfactory receptor 456	plasma membrane|membrane|integral component of membrane|	signal transduction|G-protein coupled receptor signaling pathway|sensory perception of smell|response to stimulus|detection of chemical stimulus involved in sensory perception of smell|	signal transducer activity|G-protein coupled receptor activity|olfactory receptor activity|	10	0.5	14.9	14.9	10	0.8	8.69	8.69	0.6	21.7	0.00161	0.4	1.1	0.0749931	1	0	0
ENSMUSG00000051207	MRGPRD	MAS-related GPR, member D	extracellular space|plasma membrane|integral component of membrane|	G-protein coupled receptor signaling pathway|	G-protein coupled receptor activity|	10	0.8	16.1	16.1	10	1.1	6.31	6.31	0.9	21.7	0.00161	0.5	1.5	0.0749931	1	0	0
ENSMUSG00000022377	ASAP1	ArfGAP with SH3 domain, ankyrin repeat and PH domain 1	cytoplasm|membrane|	regulation of ARF GTPase activity|positive regulation of GTPase activity|cilium morphogenesis|	protein binding|ARF GTPase activator activity|zinc ion binding|	10	0.5	16.8	16.8	10	0.6	5.37	5.37	0.5	21.7	0.00161	0.3	0.9	0.0749931	1	0	0
ENSMUSG00000059146	NTRK3	neurotrophic tyrosine kinase, receptor, type 3	cytoplasm|integral component of plasma membrane|receptor complex|	activation of MAPK activity|neuron migration|negative regulation of protein phosphorylation|transmembrane receptor protein tyrosine kinase signaling pathway|positive regulation of cell proliferation|positive regulation of gene expression|peptidyl-tyrosine phosphorylation|modulation by virus of host transcription|positive regulation of cell migration|activation of protein kinase B activity|activat…	p53 binding|transmembrane receptor protein tyrosine kinase activity|neurotrophin receptor activity|ATP binding|neurotrophin binding|ephrin receptor binding|	10	-1.8	21.3	-21.3	10	-0.9	2.82	-2.82	-1.7	21.7	0.00161	-2.7	-0.5	0.0749931	1	0	0
ENSMUSG00000037754	PPP1R16B	protein phosphatase 1, regulatory subunit 16B	nucleus|plasma membrane|plasma membrane|	signal transduction|regulation of filopodium assembly|	protein binding|protein phosphatase binding|	10	1.1	12.1	12.1	10	1	10.1	10.1	1.1	21.6	0.00166	0.7	1.7	0.0761112	1	0	0
ENSMUSG00000032504	PDCD6IP	programmed cell death 6 interacting protein	immunological synapse|cytoplasm|microtubule organizing center|cytosol|membrane|melanosome|extracellular vesicular exosome|	apoptotic process|cell cycle|protein transport|viral process|viral life cycle|cell division|	protein binding|SH3 domain binding|protein homodimerization activity|calcium-dependent protein binding|	8	1.3	17.1	17.1	8	1	5.24	5.24	1.2	21.6	0.00166	0.8	1.9	0.0761112	1	0	0
ENSMUSG00000035215	LSM7	LSM7 homolog, U6 small nuclear RNA associated (S. cerevisiae)	spliceosomal complex|cytosol|	nuclear-transcribed mRNA catabolic process, deadenylation-dependent decay|mRNA processing|RNA splicing|gene expression|RNA metabolic process|mRNA metabolic process|exonucleolytic nuclear-transcribed mRNA catabolic process involved in deadenylation-dependent decay|	protein binding|U6 snRNA binding|	8	-1.3	19.1	-19.1	8	-0.8	3.77	-3.77	-1.2	21.6	0.00166	-1.9	-0.9	0.0761112	1	0	0
ENSMUSG00000025781	ATP5C1	ATP synthase, H+ transporting, mitochondrial F1 complex, gamma polypeptide 1	mitochondrial proton-transporting ATP synthase complex, catalytic core F(1)|mitochondrion|mitochondrion|mitochondrial inner membrane|mitochondrial proton-transporting ATP synthase complex|mitochondrial matrix|membrane|extracellular vesicular exosome|	oxidative phosphorylation|ATP catabolic process|ATP catabolic process|ATP biosynthetic process|respiratory electron transport chain|mitochondrial ATP synthesis coupled proton transport|mitochondrial ATP synthesis coupled proton transport|cellular metabolic process|small molecule metabolic process|	ATPase activity|ATPase activity|transmembrane transporter activity|poly(A) RNA binding|proton-transporting ATP synthase activity, rotational mechanism|proton-transporting ATPase activity, rotational mechanism|	10	1.4	11.6	11.6	10	1.2	10.4	10.4	1.4	21.5	0.00172	0.8	2.2	0.0783364	1	0	0
ENSMUSG00000050822	SLC29A4	solute carrier family 29 (equilibrative nucleoside transporter), member 4	plasma membrane|integral component of membrane|apical plasma membrane|	transmembrane transport|nucleoside transmembrane transport|	nucleoside transmembrane transporter activity|	10	2.1	23.9	23.9	10	0.3	2.53	2.53	2.1	21.5	0.00172	1.1	4	0.0783364	1	0	0
ENSMUSG00000016256	CTSZ	cathepsin Z	extracellular space|lysosome|endoplasmic reticulum|plasma membrane|intracellular membrane-bounded organelle|extracellular vesicular exosome|	angiotensin maturation|proteolysis|cellular protein metabolic process|epithelial tube branching involved in lung morphogenesis|	cysteine-type peptidase activity|	10	0.8	12.7	12.7	10	1.9	13.8	13.8	0.7	21.4	0.00177	0.5	2.6	0.080257	1	0	0
ENSMUSG00000024921	SMARCA2	SWI/SNF related, matrix associated, actin dependent regulator of chromatin, subfamily a, member 2	nuclear chromatin|nucleus|nucleoplasm|SWI/SNF complex|intracellular membrane-bounded organelle|intermediate filament cytoskeleton|npBAF complex|nBAF complex|	negative regulation of transcription from RNA polymerase II promoter|ATP catabolic process|chromatin remodeling|transcription, DNA-templated|regulation of transcription, DNA-templated|regulation of transcription from RNA polymerase II promoter|nervous system development|negative regulation of cell proliferation|negative regulation of cell growth|aortic smooth muscle cell differentiation|negative …	RNA polymerase II transcription coactivator activity|transcription coactivator activity|helicase activity|protein binding|ATP binding|DNA-dependent ATPase activity|histone binding|transcription regulatory region DNA binding|	10	0.8	9.99	9.99	10	1	12.3	12.3	0.8	21.3	0.00183	0.6	1.5	0.0827944	1	0	0
ENSMUSG00000034931	DHX8	DEAH (Asp-Glu-Ala-His) box polypeptide 8	nucleus|spliceosomal complex|catalytic step 2 spliceosome|	mRNA splicing, via spliceosome|ATP catabolic process|ATP catabolic process|RNA processing|RNA splicing|	ATP-dependent RNA helicase activity|protein binding|ATP binding|identical protein binding|poly(A) RNA binding|	10	-4.6	24.5	-24.5	10	-0.5	2.6	-2.6	-4.6	21.3	0.00183	-8.7	-4	0.0827944	1	0	0
ENSMUSG00000035726	SUPT16	suppressor of Ty 16	nucleus|chromosome|	DNA replication|DNA repair|transcription, DNA-templated|regulation of transcription, DNA-templated|cellular response to DNA damage stimulus|	poly(A) RNA binding|	5	1.8	10.4	10.4	5	1.1	12.9	12.9	1.7	21.2	0.00187	1	2.8	0.0842322	1	0	0
ENSMUSG00000057572	ZBTB8OS	zinc finger and BTB domain containing 8 opposite strand	extracellular vesicular exosome|	None	None	9	1.4	10.6	10.6	9	1.4	11	11	1.4	21.2	0.00187	0.7	2.2	0.0842322	1	0	0
ENSMUSG00000047866	LONP2	lon peptidase 2, peroxisomal	nucleus|peroxisome|peroxisomal matrix|membrane|	ATP catabolic process|ATP catabolic process|misfolded or incompletely synthesized protein catabolic process|protein targeting to peroxisome|peroxisome organization|response to organic cyclic compound|protein processing|protein import into peroxisome matrix|regulation of fatty acid beta-oxidation|	protease binding|ATP-dependent peptidase activity|serine-type endopeptidase activity|receptor binding|protein binding|ATP binding|peptidase activity|enzyme binding|	10	1.1	11.8	11.8	10	0.6	10.2	10.2	0.6	21.2	0.00187	0.4	1.3	0.0842322	1	0	0
ENSMUSG00000039458	MTMR12	myotubularin related protein 12	cytoplasm|	dephosphorylation|	protein binding|phosphatase activity|	10	-1.7	15	-15	10	-2.1	6.94	-6.94	-1.8	21.2	0.00187	-3.5	-1.1	0.0842322	1	0	0
ENSMUSG00000045903	NPAS4	neuronal PAS domain protein 4	nucleus|transcription factor complex|	transcription, DNA-templated|signal transduction|positive regulation of transcription from RNA polymerase II promoter|	DNA binding|signal transducer activity|protein heterodimerization activity|	10	-0.8	16.8	-16.8	10	-2	6.38	-6.38	-1.2	21.2	0.00187	-2.1	-0.6	0.0842322	1	0	0
ENSMUSG00000060152	POP5	processing of precursor 5, ribonuclease P/MRP subunit (S. cerevisiae)	nucleolar ribonuclease P complex|	tRNA processing|RNA phosphodiester bond hydrolysis, endonucleolytic|	ribonuclease P activity|protein binding|	10	0.5	5.17	5.17	10	1.9	21	21	0.7	21.1	0.00195	0.4	3.1	0.086881	1	0	0
ENSMUSG00000027680	FXR1	fragile X mental retardation, autosomal homolog 1	nucleolus|cytoplasm|polysome|membrane|costamere|	apoptotic process|muscle organ development|negative regulation of translation|cell differentiation|	G-quadruplex RNA binding|RNA binding|mRNA 3'-UTR binding|poly(A) RNA binding|	9	1	3.98	3.98	9	1.1	17.4	17.4	1	21	0.002	0.7	1.7	0.0889154	1	0	0
ENSMUSG00000078789	DPH1	diphthamide biosynthesis 1	nucleus|cytoplasm|	translation|cell proliferation|peptidyl-diphthamide biosynthetic process from peptidyl-histidine|	None	10	-0.7	16.4	-16.4	10	-1.4	6.37	-6.37	-0.8	21	0.002	-1.5	-0.5	0.0889154	1	0	0
ENSMUSG00000026670	UAP1	UDP-N-acteylglucosamine pyrophosphorylase 1	cytosol|	UDP-N-acetylglucosamine biosynthetic process|UDP-N-acetylglucosamine biosynthetic process|dolichol-linked oligosaccharide biosynthetic process|protein N-linked glycosylation via asparagine|post-translational protein modification|cellular protein metabolic process|	UDP-N-acetylglucosamine diphosphorylase activity|carbohydrate binding|	10	-1.8	20.5	-20.5	10	0.6	3.82	3.82	-1.7	21	0.002	-2.9	-0.8	0.0889154	1	0	0
ENSMUSG00000060093	HIST1H4A	histone cluster 1, H4a	None	None	None	10	0.9	13.2	13.2	10	0.9	8.12	8.12	0.9	20.9	0.00206	0.6	1.5	0.0909907	1	0	0
ENSMUSG00000001098	KCTD10	potassium channel tetramerization domain containing 10	nucleus|cytoplasm|Cul3-RING ubiquitin ligase complex|TCTN-B9D complex|	protein ubiquitination|protein ubiquitination|proteasome-mediated ubiquitin-dependent protein catabolic process|protein homooligomerization|	ubiquitin-protein transferase activity|	10	-1.6	17.2	-17.2	10	-0.7	5.84	-5.84	-1	20.9	0.00206	-1.9	-0.5	0.0909907	1	0	0
ENSMUSG00000063887	NLGN1	neuroligin 1	integral component of plasma membrane|integral component of plasma membrane|external side of plasma membrane|cell surface|cell surface|N-methyl-D-aspartate selective glutamate receptor complex|cell junction|dendrite|filopodium tip|synapse|synapse|postsynaptic membrane|neuronal postsynaptic density|	regulation of respiratory gaseous exchange by neurological system process|protein targeting|heterophilic cell-cell adhesion|neuron cell-cell adhesion|neuron cell-cell adhesion|nervous system development|synapse assembly|synapse assembly|synaptic vesicle targeting|calcium-dependent cell-cell adhesion|neuronal signal transduction|positive regulation of synaptic transmission, GABAergic|protein local…	receptor activity|receptor activity|PDZ domain binding|neurexin family protein binding|neurexin family protein binding|protein dimerization activity|cell adhesion molecule binding|	10	-2	23.7	-23.7	10	0.9	4.12	4.12	-1.9	20.9	0.00206	-4	-1.1	0.0909907	1	0	0
ENSMUSG00000005204	SENP3	SUMO1/sentrin/SMT3 specific peptidase 3	nucleolus|cytoplasm|MLL1 complex|	proteolysis|	ubiquitin-specific protease activity|protein binding|	10	-1	17.6	-17.6	10	-1	3.62	-3.62	-1	20.9	0.00206	-1.6	-0.6	0.0909907	1	0	0
ENSMUSG00000095758	VMN1R128	vomeronasal 1 receptor 128	cellular_component|membrane|integral component of membrane|	signal transduction|G-protein coupled receptor signaling pathway|biological_process|response to stimulus|sensory perception of taste|	molecular_function|signal transducer activity|G-protein coupled receptor activity|	9	1.1	11.8	11.8	10	0.7	10.2	10.2	0.9	20.8	0.00212	0.5	1.5	0.0928406	1	0	0
ENSMUSG00000018442	DERL2	derlin 2	early endosome|late endosome|endoplasmic reticulum|membrane|integral component of endoplasmic reticulum membrane|	suckling behavior|positive regulation of cell proliferation|positive regulation of cell growth|ER-associated ubiquitin-dependent protein catabolic process|endoplasmic reticulum unfolded protein response|retrograde protein transport, ER to cytosol|	protein binding|	9	-0.8	12.7	-12.7	9	-1.1	9.13	-9.13	-0.8	20.8	0.00212	-1.5	-0.6	0.0928406	1	0	0
ENSMUSG00000034021	PDS5B	PDS5, regulator of cohesion maintenance, homolog B (S. cerevisiae)	chromosome, centromeric region|chromatin|nucleus|nucleus|nucleoplasm|chromosome|cytosol|	mitotic cell cycle|mitotic sister chromatid cohesion|cell proliferation|negative regulation of cell proliferation|regulation of cell proliferation|	DNA binding|protein binding|ATP binding|	10	1.3	12.6	12.6	10	1.3	8.64	8.64	1.3	20.8	0.00212	0.9	2.4	0.0928406	1	0	0
ENSMUSG00000031557	PLEKHA2	pleckstrin homology domain containing, family A (phosphoinositide binding specific) member 2	nucleus|cytoplasm|plasma membrane|membrane|protein complex|	positive regulation of cell-matrix adhesion|	fibronectin binding|protein binding|1-phosphatidylinositol binding|PDZ domain binding|laminin binding|	10	-0.5	14.4	-14.4	10	-1	7.88	-7.88	-0.9	20.8	0.00212	-1.4	-0.4	0.0928406	1	0	0
ENSMUSG00000031708	TECR	trans-2,3-enoyl-CoA reductase	nucleus|endoplasmic reticulum|endoplasmic reticulum membrane|integral component of endoplasmic reticulum membrane|	triglyceride biosynthetic process|fatty acid elongation|long-chain fatty-acyl-CoA biosynthetic process|very long-chain fatty acid biosynthetic process|cellular lipid metabolic process|small molecule metabolic process|oxidation-reduction process|	oxidoreductase activity, acting on the CH-CH group of donors|	10	-0.7	15.6	-15.6	10	-0.7	5.66	-5.66	-0.7	20.8	0.00212	-1.1	-0.4	0.0928406	1	0	0
ENSMUSG00000025395	PRIM1	primase, DNA, polypeptide 1 (49kDa)	nucleoplasm|membrane|primosome complex|	G1/S transition of mitotic cell cycle|mitotic cell cycle|telomere maintenance via recombination|telomere maintenance|DNA replication, synthesis of RNA primer|DNA replication initiation|DNA strand elongation involved in DNA replication|telomere maintenance via semi-conservative replication|	DNA primase activity|metal ion binding|	9	-1.8	19.8	-19.8	9	0.6	4.51	4.51	-1.8	20.8	0.00212	-3	-1	0.0928406	1	0	0
ENSMUSG00000018841	RAD51D	RAD51 paralog D	chromosome, telomeric region|nucleus|replication fork|cytoplasm|centrosome|Rad51B-Rad51C-Rad51D-XRCC2 complex|	telomere maintenance|double-strand break repair via homologous recombination|ATP catabolic process|ATP catabolic process|DNA repair|reciprocal meiotic recombination|strand invasion|	four-way junction DNA binding|DNA binding|single-stranded DNA binding|protein binding|ATP binding|DNA-dependent ATPase activity|gamma-tubulin binding|	10	1.4	19.3	19.3	8	0.7	3.64	3.64	1.3	20.8	0.00212	0.9	1.9	0.0928406	1	0	0
ENSMUSG00000094578	GM3187	predicted gene 3187	cellular_component|	biological_process|	molecular_function|	10	1.5	9.62	9.62	10	1.1	12	12	1.4	20.7	0.00218	0.6	2.1	0.0940613	1	0	0
ENSMUSG00000038121	FAM210A	family with sequence similarity 210, member A	mitochondrion|integral component of membrane|	None	None	9	0.8	9.72	9.72	9	0.8	11.4	11.4	0.8	20.7	0.00218	0.5	1.3	0.0940613	1	0	0
ENSMUSG00000020074	CCAR1	cell division cycle and apoptosis regulator 1	nucleoplasm|perinuclear region of cytoplasm|	mRNA splicing, via spliceosome|transcription, DNA-templated|regulation of transcription, DNA-templated|apoptotic process|cell cycle|RNA splicing|gene expression|	protein binding|ligand-dependent nuclear receptor transcription coactivator activity|poly(A) RNA binding|	10	1.2	12.1	12.1	10	0.6	10.1	10.1	0.7	20.7	0.00218	0.5	1.5	0.0940613	1	0	0
ENSMUSG00000090827	GM8297	predicted gene 8297	cellular_component|	biological_process|	molecular_function|	7	0.6	14.2	14.2	6	0.8	7.28	7.28	0.7	20.7	0.00218	0.4	1.2	0.0940613	1	0	0
ENSMUSG00000094258	GM8159	predicted gene 8159	cellular_component|	biological_process|	molecular_function|	7	0.6	14.2	14.2	6	0.8	7.28	7.28	0.7	20.7	0.00218	0.4	1.2	0.0940613	1	0	0
ENSMUSG00000029012	ORC5	origin recognition complex, subunit 5	origin recognition complex|nucleus|nucleus|nucleoplasm|nuclear origin of replication recognition complex|nuclear origin of replication recognition complex|cytoplasm|	G1/S transition of mitotic cell cycle|mitotic cell cycle|DNA replication|DNA replication|DNA replication initiation|	nucleotide binding|molecular_function|DNA replication origin binding|protein binding|ATP binding|	9	1.4	19	19	9	0.6	3.84	3.84	1.1	20.7	0.00218	0.6	2	0.0940613	1	0	0
ENSMUSG00000079410	GM2897	predicted gene 2897	None	None	None	7	1.8	23.6	23.6	7	0	0	0	1.8	20.7	0.00218	1.3	3	0.0940613	1	0	0
ENSMUSG00000091472	GM3739	predicted gene 3739	None	None	None	10	1.8	23.9	23.9	10	0	0	0	1.8	20.7	0.00218	1.1	3	0.0940613	1	0	0
ENSMUSG00000034088	HDLBP	high density lipoprotein binding protein	nucleus|cytoplasm|plasma membrane|high-density lipoprotein particle|	lipid transport|cholesterol metabolic process|	protein binding|lipid binding|poly(A) RNA binding|	10	-0.6	11	-11	10	-1.4	11.9	-11.9	-1.1	20.6	0.00225	-1.7	-0.5	0.0954736	1	0	0
ENSMUSG00000027166	DNAJC24	DnaJ (Hsp40) homolog, subfamily C, member 24	cytoplasm|cytoskeleton|	peptidyl-diphthamide biosynthetic process from peptidyl-histidine|positive regulation of ATPase activity|oxidation-reduction process|chaperone-mediated protein folding|	ATPase activator activity|ferrous iron binding|zinc ion binding|	10	-0.7	13.7	-13.7	10	-1.5	8.29	-8.29	-1.1	20.6	0.00225	-1.8	-0.5	0.0954736	1	0	0
ENSMUSG00000043705	CAPN13	calpain 13	cytoplasm|	proteolysis|	calcium-dependent cysteine-type endopeptidase activity|calcium ion binding|	10	1	15.7	15.7	9	0.9	5.28	5.28	0.9	20.6	0.00225	0.6	1.5	0.0954736	1	0	0
ENSMUSG00000095226	GM10377	predicted gene 10377	cellular_component|	biological_process|	molecular_function|	9	0.8	16.5	16.5	9	0.6	5	5	0.8	20.6	0.00225	0.5	1.3	0.0954736	1	0	0
ENSMUSG00000072605	GM10376	predicted gene 10376	cellular_component|	biological_process|	molecular_function|	9	0.8	16.5	16.5	9	0.6	5	5	0.8	20.6	0.00225	0.5	1.3	0.0954736	1	0	0
ENSMUSG00000014771	PDCD2	programmed cell death 2	nucleus|cytoplasm|extracellular vesicular exosome|	apoptotic process|	DNA binding|protein binding|enzyme binding|metal ion binding|	8	1.5	3.88	3.88	8	2.1	17.9	17.9	2	20.5	0.00235	1.4	3.8	0.0986952	1	0	0
ENSMUSG00000027937	JTB	jumping translocation breakpoint	cytoplasm|mitochondrion|centrosome|spindle|integral component of plasma membrane|membrane|midbody|	cytokinesis|mitotic nuclear division|apoptotic mitochondrial changes|regulation of cell proliferation|positive regulation of protein kinase activity|	protein kinase binding|	10	-0.8	9.3	-9.3	10	-0.9	11.8	-11.8	-0.9	20.5	0.00235	-1.3	-0.6	0.0986952	1	0	0
ENSMUSG00000025580	EIF4A3	eukaryotic translation initiation factor 4A3	nucleus|cytoplasm|cytosol|membrane|nuclear speck|exon-exon junction complex|catalytic step 2 spliceosome|	nuclear-transcribed mRNA catabolic process, nonsense-mediated decay|nuclear-transcribed mRNA catabolic process, nonsense-mediated decay|nuclear-transcribed mRNA catabolic process, deadenylation-dependent decay|nuclear-transcribed mRNA poly(A) tail shortening|mRNA splicing, via spliceosome|ATP catabolic process|ATP catabolic process|rRNA processing|gene expression|RNA metabolic process|mRNA metabo…	mRNA binding|ATP-dependent RNA helicase activity|protein binding|ATP binding|poly(A) binding|poly(A) RNA binding|	7	1	16.2	16.2	8	1	4.72	4.72	1	20.5	0.00235	0.7	1.7	0.0986952	1	0	0
ENSMUSG00000037022	MMAA	methylmalonic aciduria (cobalamin deficiency) cblA type	mitochondrial matrix|	fatty acid beta-oxidation|vitamin metabolic process|water-soluble vitamin metabolic process|cobalamin metabolic process|cobalamin biosynthetic process|short-chain fatty acid catabolic process|cellular lipid metabolic process|small molecule metabolic process|	GTP binding|nucleoside-triphosphatase activity|	10	-0.7	16.6	-16.6	10	-0.6	4.38	-4.38	-0.7	20.5	0.00235	-1.1	-0.4	0.0986952	1	0	0
ENSMUSG00000020961	STON2	stonin 2	nucleolus|cytoplasm|synaptic vesicle|cell junction|clathrin adaptor complex|clathrin-coated vesicle|neuron projection|	intracellular protein transport|regulation of endocytosis|synaptic vesicle endocytosis|	protein binding|	10	2.1	22.5	22.5	10	0.5	1.7	1.7	2.1	20.5	0.00235	1.4	4	0.0986952	1	0	0
ENSMUSG00000038861	PI4KB	phosphatidylinositol 4-kinase, catalytic, beta	Golgi membrane|cytoplasm|mitochondrial outer membrane|endosome|cytosol|plasma membrane|rough endoplasmic reticulum membrane|perinuclear region of cytoplasm|	phospholipid metabolic process|phosphatidylinositol biosynthetic process|receptor-mediated endocytosis|signal transduction|small molecule metabolic process|phosphatidylinositol phosphorylation|phosphatidylinositol-mediated signaling|	1-phosphatidylinositol 4-kinase activity|protein binding|ATP binding|	9	-0.8	19.8	-19.8	8	-0.4	1.22	-1.22	-0.8	20.5	0.00235	-1.4	-0.5	0.0986952	1	0	0
ENSMUSG00000090691	GM3667	predicted gene 3667	None	None	None	7	1.9	23.4	23.4	7	0	0	0	1.8	20.5	0.00235	1.3	3	0.0986952	1	0	0
ENSMUSG00000035847	IDS	iduronate 2-sulfatase	lysosomal lumen|	carbohydrate metabolic process|glycosaminoglycan catabolic process|glycosaminoglycan metabolic process|chondroitin sulfate metabolic process|chondroitin sulfate catabolic process|small molecule metabolic process|	iduronate-2-sulfatase activity|metal ion binding|	9	-1.8	22.1	-22.1	9	0.9	1.38	1.38	-1.7	20.4	0.00248	-2.7	-0.3	0.102682	0	0	0
ENSMUSG00000023915	TNFRSF21	tumor necrosis factor receptor superfamily, member 21	plasma membrane|integral component of plasma membrane|axon|intrinsic component of plasma membrane|	B cell apoptotic process|adaptive immune response|apoptotic process|humoral immune response|negative regulation of B cell proliferation|negative regulation of myelination|negative regulation of T cell proliferation|myelination|cellular lipid metabolic process|small molecule metabolic process|regulation of oligodendrocyte differentiation|T cell receptor signaling pathway|neuron apoptotic process|c…	protein binding|	10	0.3	3.61	3.61	10	2.5	23.3	23.3	2.5	20.3	0.00262	0.4	5	0.10826	0	0	0
ENSMUSG00000019432	DDX39B	DEAD (Asp-Glu-Ala-Asp) box polypeptide 39B	transcription export complex|nucleus|spliceosomal complex|U4 snRNP|U6 snRNP|cytoplasm|nuclear speck|	spliceosomal complex assembly|mRNA splicing, via spliceosome|ATP catabolic process|ATP catabolic process|mRNA export from nucleus|mRNA export from nucleus|RNA splicing|RNA secondary structure unwinding|positive regulation of DNA-templated transcription, elongation|viral mRNA export from host cell nucleus|negative regulation of DNA damage checkpoint|	ATP-dependent RNA helicase activity|protein binding|ATP binding|RNA-dependent ATPase activity|U6 snRNA binding|U4 snRNA binding|ATP-dependent protein binding|poly(A) RNA binding|	8	0.5	5.25	5.25	8	1	17.3	17.3	0.8	20.3	0.00262	0.5	1.5	0.10826	0	0	0
ENSMUSG00000022400	RBX1	ring-box 1, E3 ubiquitin protein ligase	nucleoplasm|cytosol|cytosol|SCF ubiquitin ligase complex|SCF ubiquitin ligase complex|VCB complex|cullin-RING ubiquitin ligase complex|Cul2-RING ubiquitin ligase complex|Cul3-RING ubiquitin ligase complex|Cul4A-RING E3 ubiquitin ligase complex|Cul4B-RING E3 ubiquitin ligase complex|Cul5-RING ubiquitin ligase complex|Cul7-RING ubiquitin ligase complex|	DNA repair|protein monoubiquitination|Notch signaling pathway|viral process|protein ubiquitination|SCF-dependent proteasomal ubiquitin-dependent protein catabolic process|SCF-dependent proteasomal ubiquitin-dependent protein catabolic process|proteasome-mediated ubiquitin-dependent protein catabolic process|protein neddylation|regulation of transcription from RNA polymerase II promoter in respons…	ubiquitin-protein transferase activity|ubiquitin-protein transferase activity|protein binding|zinc ion binding|NEDD8 ligase activity|ubiquitin protein ligase binding|protein complex binding|	9	-0.9	8.48	-8.48	9	-1.1	12.5	-12.5	-0.9	20.3	0.00262	-1.9	-0.5	0.10826	0	0	0
ENSMUSG00000017548	SUZ12	SUZ12 polycomb repressive complex 2 subunit	sex chromatin|nucleus|nucleoplasm|ESC/E(Z) complex|ESC/E(Z) complex|	negative regulation of transcription from RNA polymerase II promoter|transcription, DNA-templated|positive regulation of cell proliferation|histone methylation|histone ubiquitination|negative regulation of cell differentiation|	chromatin binding|protein binding|methylated histone binding|histone methyltransferase activity|sequence-specific DNA binding|metal ion binding|	10	-0.6	9.45	-9.45	10	-1	12.4	-12.4	-0.8	20.3	0.00262	-1.3	-0.4	0.10826	0	0	0
ENSMUSG00000027263	TUBGCP4	tubulin, gamma complex associated protein 4	spindle pole|centrosome|cytosol|microtubule|gamma-tubulin ring complex|microtubule cytoskeleton|membrane|	G2/M transition of mitotic cell cycle|mitotic cell cycle|protein complex assembly|microtubule nucleation|	structural constituent of cytoskeleton|	7	1.6	10.1	10.1	7	1.9	10.9	10.9	1.7	20.2	0.00267	1.2	3.6	0.109443	0	0	0
ENSMUSG00000096685	GM3642	predicted gene 3642	cellular_component|	biological_process|	molecular_function|	10	0.6	13	13	10	0.5	7.82	7.82	0.5	20.2	0.00267	0.3	0.8	0.109443	0	0	0
ENSMUSG00000021754	MAP3K1	mitogen-activated protein kinase kinase kinase 1, E3 ubiquitin protein ligase	cytosol|	activation of MAPKK activity|activation of MAPKK activity|toll-like receptor signaling pathway|MyD88-dependent toll-like receptor signaling pathway|epithelial cell morphogenesis|protein phosphorylation|transforming growth factor beta receptor signaling pathway|activation of JUN kinase activity|apoptotic mitochondrial changes|regulation of cell migration|positive regulation of actin filament polym…	protein kinase activity|MAP kinase kinase kinase activity|protein binding|ATP binding|zinc ion binding|JUN kinase kinase activity|protein kinase binding|	10	1.3	14.7	14.7	10	1.1	6.07	6.07	1.2	20.2	0.00267	0.6	2	0.109443	0	0	0
ENSMUSG00000026019	WDR12	WD repeat domain 12	nucleoplasm|nucleolus|preribosome, large subunit precursor|PeBoW complex|	maturation of LSU-rRNA from tricistronic rRNA transcript (SSU-rRNA, 5.8S rRNA, LSU-rRNA)|maturation of 5.8S rRNA from tricistronic rRNA transcript (SSU-rRNA, 5.8S rRNA, LSU-rRNA)|Notch signaling pathway|cell proliferation|ribosomal large subunit biogenesis|	protein binding|ribonucleoprotein complex binding|	8	0.8	15.5	15.5	8	1.2	5.81	5.81	0.9	20.2	0.00267	0.6	1.8	0.109443	0	0	0
ENSMUSG00000025137	PCYT2	phosphate cytidylyltransferase 2, ethanolamine	cellular_component|endoplasmic reticulum membrane|	phospholipid metabolic process|phosphatidylethanolamine biosynthetic process|phosphatidylethanolamine biosynthetic process|phospholipid biosynthetic process|small molecule metabolic process|glycerophospholipid biosynthetic process|	ethanolamine-phosphate cytidylyltransferase activity|	10	-1.2	16	-16	10	-1.5	4.71	-4.71	-1.4	20.2	0.00267	-2.1	-0.6	0.109443	0	0	0
ENSMUSG00000051936	PRSS58	protease, serine, 58	extracellular region|	proteolysis|	serine-type endopeptidase activity|	10	-1.9	23.5	-23.5	10	0	0	0	-1.9	20.2	0.00267	-3	-1	0.109443	0	0	0
ENSMUSG00000042712	WBP5	WW domain binding protein 5	None	None	WW domain binding|	10	-0.9	9.08	-9.08	10	-1.2	12	-12	-1.1	20.1	0.00278	-2.2	-0.7	0.112601	0	0	0
ENSMUSG00000028798	EIF3I	eukaryotic translation initiation factor 3, subunit I	cytosol|eukaryotic translation initiation factor 3 complex|eukaryotic 43S preinitiation complex|eukaryotic 48S preinitiation complex|extracellular vesicular exosome|	formation of translation preinitiation complex|translation|translational initiation|translational initiation|translational initiation|regulation of translational initiation|gene expression|cellular protein metabolic process|	translation initiation factor activity|translation initiation factor activity|protein binding|	9	0.7	10	10	8	0.7	10.5	10.5	0.7	20.1	0.00278	0.4	1.3	0.112601	0	0	0
ENSMUSG00000006498	PTBP1	polypyrimidine tract binding protein 1	nucleoplasm|nucleolus|membrane|extracellular vesicular exosome|	alternative mRNA splicing, via spliceosome|regulation of alternative mRNA splicing, via spliceosome|mRNA splicing, via spliceosome|mRNA processing|RNA splicing|gene expression|negative regulation of RNA splicing|negative regulation of mRNA splicing, via spliceosome|negative regulation of muscle cell differentiation|	nucleotide binding|RNA binding|protein binding|poly-pyrimidine tract binding|pre-mRNA binding|poly(A) RNA binding|	10	0.5	13.6	13.6	10	0.8	7.56	7.56	0.7	20.1	0.00278	0.4	1.1	0.112601	0	0	0
ENSMUSG00000022034	ESCO2	establishment of sister chromatid cohesion N-acetyltransferase 2	chromatin|nucleus|nucleoplasm|Golgi apparatus|	mitotic cell cycle|regulation of DNA replication|post-translational protein acetylation|	transferase activity, transferring acyl groups|metal ion binding|	10	1	13.2	13.2	10	1.3	7.55	7.55	1.1	20.1	0.00278	0.6	1.9	0.112601	0	0	0
ENSMUSG00000015023	DDX19A	DEAD (Asp-Glu-Ala-Asp) box polypeptide 19A	nuclear pore|cytoplasm|membrane|nuclear membrane|	biological_process|metabolic process|response to zinc ion|protein transport|positive regulation of apoptotic process|mRNA transport|	molecular_function|RNA binding|helicase activity|ATP binding|	10	1.5	13.6	13.6	10	1.6	7.01	7.01	1.5	20.1	0.00278	0.9	2.6	0.112601	0	0	0
ENSMUSG00000014856	TMEM208	transmembrane protein 208	endoplasmic reticulum membrane|integral component of membrane|	autophagy|	None	10	0.8	17	17	10	0.5	4.47	4.47	0.8	20.1	0.00278	0.4	1.2	0.112601	0	0	0
ENSMUSG00000024150	MCFD2	multiple coagulation factor deficiency 2	endoplasmic reticulum|endoplasmic reticulum-Golgi intermediate compartment|Golgi apparatus|ER to Golgi transport vesicle membrane|	protein transport|vesicle-mediated transport|protein N-linked glycosylation via asparagine|post-translational protein modification|cellular protein metabolic process|	calcium ion binding|	10	0.6	9.99	9.99	10	0.8	10.8	10.8	0.7	20	0.00282	0.5	1.2	0.112883	0	0	0
ENSMUSG00000068600	HEMT1	hematopoietic cell transcript 1	cellular_component|	biological_process|	molecular_function|	10	0.9	12.4	12.4	10	0.6	8.6	8.6	0.8	20	0.00282	0.4	1.3	0.112883	0	0	0
ENSMUSG00000026275	PPP1R7	protein phosphatase 1, regulatory subunit 7	nucleus|chromosome|cytoplasm|extracellular vesicular exosome|	biological_process|positive regulation of protein dephosphorylation|regulation of catalytic activity|regulation of catalytic activity|	protein phosphatase type 1 regulator activity|enzyme regulator activity|	7	1.3	12.6	12.6	8	1.6	8.46	8.46	1.4	20	0.00282	0.8	2.5	0.112883	0	0	0
ENSMUSG00000090551	A730015C16RIK	RIKEN cDNA A730015C16 gene	cellular_component|	biological_process|	molecular_function|	10	1.4	14.7	14.7	9	0.9	6.87	6.87	1.2	20	0.00282	0.8	1.9	0.112883	0	0	0
ENSMUSG00000002814	TOP3A	topoisomerase (DNA) III alpha	nucleus|chromosome|PML body|	DNA topological change|meiotic nuclear division|	DNA binding|DNA topoisomerase type I activity|protein binding|zinc ion binding|	7	0.9	14.6	14.6	7	0.7	5.84	5.84	0.8	20	0.00282	0.5	1.5	0.112883	0	0	0
ENSMUSG00000031422	MORF4L2	mortality factor 4 like 2	nucleus|nucleoplasm|nucleolus|	DNA repair|chromatin organization|transcription, DNA-templated|chromatin modification|regulation of growth|positive regulation of transcription from RNA polymerase II promoter|positive regulation of striated muscle cell differentiation|	protein binding|	10	-0.9	15	-15	10	-0.7	5.58	-5.58	-0.8	20	0.00282	-1.4	-0.5	0.112883	0	0	0
ENSMUSG00000033161	ATP1A1	ATPase, Na+/K+ transporting, alpha 1 polypeptide	endosome|endoplasmic reticulum|Golgi apparatus|plasma membrane|plasma membrane|sodium:potassium-exchanging ATPase complex|caveola|membrane|integral component of membrane|basolateral plasma membrane|T-tubule|melanosome|protein complex|extracellular vesicular exosome|	regulation of the force of heart contraction|regulation of sodium ion transport|ATP biosynthetic process|regulation of blood pressure|potassium ion import|negative regulation of glucocorticoid biosynthetic process|ion transmembrane transport|sodium ion transmembrane transport|sodium ion transmembrane transport|sodium ion transmembrane transport|response to drug|negative regulation of heart contra…	sodium:potassium-exchanging ATPase activity|protein binding|ATP binding|protein kinase binding|protein domain specific binding|ankyrin binding|potassium ion binding|sodium ion binding|ADP binding|phosphatidylinositol 3-kinase binding|chaperone binding|	9	-2.1	17.9	-17.9	8	-1.3	3.69	-3.69	-2.1	20	0.00282	-3.2	-0.9	0.112883	0	0	0
ENSMUSG00000074582	ARFGEF2	ADP-ribosylation factor guanine nucleotide-exchange factor 2 (brefeldin A-inhibited)	Golgi membrane|trans-Golgi network|trans-Golgi network|microtubule organizing center|cytosol|axonemal microtubule|membrane|cytoplasmic membrane-bounded vesicle|cell junction|cytoplasmic vesicle|asymmetric synapse|symmetric synapse|dendritic spine|perinuclear region of cytoplasm|recycling endosome|	receptor recycling|exocytosis|Golgi to plasma membrane transport|endosome organization|endomembrane system organization|protein transport|vesicle-mediated transport|regulation of ARF protein signal transduction|positive regulation of tumor necrosis factor production|intracellular signal transduction|positive regulation of GTPase activity|positive regulation of GTPase activity|positive regulation …	guanyl-nucleotide exchange factor activity|ARF guanyl-nucleotide exchange factor activity|ARF guanyl-nucleotide exchange factor activity|protein binding|myosin binding|protein kinase A regulatory subunit binding|GABA receptor binding|	10	-1.2	18.2	-18.2	10	-1	2.31	-2.31	-1.1	20	0.00282	-1.8	-0.7	0.112883	0	0	0
ENSMUSG00000096629	GM3383	predicted gene 3383	None	None	None	8	1.8	23.2	23.2	8	-0.1	0.0116	-0.0116	1.8	20	0.00282	1.2	3	0.112883	0	0	0
ENSMUSG00000094825	GM3194	predicted gene 3194	None	None	None	8	1.8	23.2	23.2	8	-0.1	0.0116	-0.0116	1.8	20	0.00282	1.2	3	0.112883	0	0	0
ENSMUSG00000026455	KLHL12	kelch-like family member 12	Golgi membrane|ER to Golgi transport vesicle|Cul3-RING ubiquitin ligase complex|	protein monoubiquitination|ER to Golgi vesicle-mediated transport|Wnt signaling pathway|COPII vesicle coating|	protein binding|	9	1.7	13.1	13.1	9	1.1	9.01	9.01	1.6	19.9	0.00292	0.8	2.4	0.114646	0	0	0
ENSMUSG00000024181	MRPL28	mitochondrial ribosomal protein L28	nucleus|cytoplasm|mitochondrion|mitochondrial ribosome|mitochondrial ribosome|	translation|	structural constituent of ribosome|protein binding|poly(A) RNA binding|	10	1.6	11.5	11.5	10	1.5	8.82	8.82	1.6	19.9	0.00292	0.8	2.6	0.114646	0	0	0
ENSMUSG00000095550	GM21671	predicted gene, 21671	None	None	None	8	0.8	12.3	12.3	8	0.8	7.93	7.93	0.8	19.9	0.00292	0.5	1.3	0.114646	0	0	0
ENSMUSG00000031913	VPS4A	vacuolar protein sorting 4 homolog A (S. cerevisiae)	ESCRT III complex|cytoplasm|cytosol|midbody|late endosome membrane|perinuclear region of cytoplasm|extracellular vesicular exosome|	cytokinesis|ATP catabolic process|abscission|protein transport|viral process|vesicle-mediated transport|endosomal transport|endosomal transport|viral life cycle|cytokinesis checkpoint|negative regulation of cytokinesis|membrane organization|	protein binding|ATP binding|protein C-terminus binding|protein domain specific binding|ATPase activity, coupled|	9	2	23	23	9	-1	7	-7	2	19.9	0.00292	1.6	4	0.114646	0	0	0
ENSMUSG00000022551	CYC1	cytochrome c-1	nucleus|mitochondrion|mitochondrial inner membrane|membrane|integral component of membrane|respiratory chain|	respiratory electron transport chain|response to glucagon|cellular metabolic process|small molecule metabolic process|	iron ion binding|heme binding|electron transporter, transferring electrons from CoQH2-cytochrome c reductase complex and cytochrome c oxidase complex activity|	9	0.8	13.7	13.7	9	0.8	6.54	6.54	0.8	19.9	0.00292	0.5	1.4	0.114646	0	0	0
ENSMUSG00000094910	D430019H16RIK	RIKEN cDNA D430019H16 gene	cellular_component|	biological_process|	molecular_function|	10	-1.8	21.1	-21.1	10	0	0	0	-1.8	19.9	0.00292	-3	-1.1	0.114646	0	0	0
ENSMUSG00000000787	DDX3X	DEAD (Asp-Glu-Ala-Asp) box helicase 3, X-linked	nucleus|cytoplasm|mitochondrial outer membrane|eukaryotic translation initiation factor 3 complex|cytoplasmic stress granule|nuclear speck|cytosolic small ribosomal subunit|extracellular vesicular exosome|	ATP catabolic process|ATP catabolic process|ATP catabolic process|transcription, DNA-templated|chromosome segregation|extrinsic apoptotic signaling pathway via death domain receptors|response to virus|RNA secondary structure unwinding|viral process|negative regulation of translation|positive regulation of cell growth|negative regulation of cell growth|negative regulation of protein complex assemb…	DNA binding|RNA binding|ATP-dependent DNA helicase activity|ATP-dependent RNA helicase activity|protein binding|ATP binding|transcription factor binding|poly(A) binding|eukaryotic initiation factor 4E binding|ATPase activity|translation initiation factor binding|RNA stem-loop binding|ribosomal small subunit binding|poly(A) RNA binding|mRNA 5'-UTR binding|	6	1	9.66	9.66	6	1.5	11.8	11.8	1.3	19.8	0.00303	0.8	2.5	0.117613	0	0	0
ENSMUSG00000023980	TAF8	TAF8 RNA polymerase II, TATA box binding protein (TBP)-associated factor, 43kDa	nucleus|transcription factor TFIID complex|perinuclear region of cytoplasm|	inner cell mass cell proliferation|transcription, DNA-templated|cell differentiation|regulation of fat cell differentiation|positive regulation of transcription, DNA-templated|maintenance of protein location in nucleus|	protein binding|protein heterodimerization activity|	10	0.7	16.3	16.3	9	0.7	3.9	3.9	0.7	19.8	0.00303	0.4	1.2	0.117613	0	0	0
ENSMUSG00000051627	HIST1H1E	histone cluster 1, H1e	nucleosome|nucleus|nuclear heterochromatin|extracellular vesicular exosome|	nucleosome assembly|nucleosome positioning|	protein binding|chromatin DNA binding|poly(A) RNA binding|	10	-0.8	9.78	-9.78	10	-1.3	12.4	-12.4	-0.9	19.7	0.0031	-1.7	-0.5	0.119876	0	0	0
ENSMUSG00000079477	RAB7	RAB7, member RAS oncogene family	intracellular|cell|cytoplasm|lysosome|lysosome|endosome|late endosome|late endosome|late endosome|Golgi apparatus|membrane|cytoplasmic vesicle|intracellular membrane-bounded organelle|phagocytic vesicle|extracellular vesicular exosome|alveolar lamellar body|	GTP catabolic process|protein targeting to lysosome|transport|intracellular protein transport|epidermal growth factor catabolic process|small GTPase mediated signal transduction|endosome to lysosome transport|protein transport|early endosome to late endosome transport|bone resorption|phagosome acidification|phagosome-lysosome fusion|	nucleotide binding|GTPase activity|protein binding|GTP binding|GDP binding|Rac GTPase binding|	3	1.6	7.87	7.87	3	1.4	12.3	12.3	1.5	19.7	0.0031	1.2	2.9	0.119876	0	0	0
ENSMUSG00000096619	GM2035	eukaryotic translation initiation factor 1A-like 2 pseudogene	None	None	None	10	0.6	10.2	10.2	10	0.7	10.1	10.1	0.6	19.7	0.0031	0.4	1.1	0.119876	0	0	0
ENSMUSG00000025532	CRCP	CGRP receptor component	acrosomal vesicle|nucleus|plasma membrane|DNA polymerase III complex|	transcription from RNA polymerase III promoter|neuropeptide signaling pathway|innate immune response|defense response to virus|	nucleotide binding|calcitonin gene-related polypeptide receptor activity|DNA-directed RNA polymerase activity|	9	-1	4.42	-4.42	9	2	22.7	22.7	2	19.6	0.00324	0.9	4	0.124585	0	0	0
ENSMUSG00000095797	GM8246	predicted gene 8246	cellular_component|	biological_process|	molecular_function|	10	0.8	9.64	9.64	10	0.8	10.3	10.3	0.8	19.6	0.00324	0.4	1.3	0.124585	0	0	0
ENSMUSG00000020476	DBNL	drebrin-like	Golgi membrane|ruffle|podosome|cytoplasm|cytosol|plasma membrane|cell cortex|postsynaptic density|lamellipodium|cell junction|dendrite|clathrin-coated vesicle membrane|extracellular vesicular exosome|	immune system process|endocytosis|apoptotic process|cellular component disassembly involved in execution phase of apoptosis|activation of JUN kinase activity|synapse assembly|Rac protein signal transduction|neuron projection morphogenesis|podosome assembly|	actin binding|protein binding|protein C-terminus binding|enzyme activator activity|protein domain specific binding|actin filament binding|	10	0.5	12.3	12.3	10	0.6	7.82	7.82	0.6	19.6	0.00324	0.4	1	0.124585	0	0	0
ENSMUSG00000029311	HSD17B11	hydroxysteroid (17-beta) dehydrogenase 11	extracellular region|cytoplasm|lipid particle|	steroid biosynthetic process|androgen catabolic process|oxidation-reduction process|	estradiol 17-beta-dehydrogenase activity|steroid dehydrogenase activity|	9	1.1	12.4	12.4	9	1.2	7.69	7.69	1.1	19.6	0.00324	0.8	1.8	0.124585	0	0	0
ENSMUSG00000069237	C78339	expressed sequence C78339	cellular_component|	biological_process|	molecular_function|	10	-2	15.8	-15.8	10	-1.4	4.99	-4.99	-2	19.6	0.00324	-3.8	-1.3	0.124585	0	0	0
ENSMUSG00000009293	UBE2G2	ubiquitin-conjugating enzyme E2G 2	endoplasmic reticulum|cytosol|	ubiquitin-dependent protein catabolic process|protein N-linked glycosylation via asparagine|ER-associated ubiquitin-dependent protein catabolic process|protein K48-linked ubiquitination|	ubiquitin-protein transferase activity|protein binding|ATP binding|acid-amino acid ligase activity|	10	-0.7	16.6	-16.6	10	-0.7	3.37	-3.37	-0.7	19.6	0.00324	-1.2	-0.4	0.124585	0	0	0
ENSMUSG00000094793	MUP12	major urinary protein 12	cellular_component|	biological_process|	molecular_function|	9	1.1	6.09	6.09	9	0.8	14.4	14.4	0.9	19.5	0.00336	0.6	1.6	0.127761	0	0	0
ENSMUSG00000019814	LTV1	LTV1 ribosome biogenesis factor	nucleus|cytoplasm|	None	None	10	-0.6	6.59	-6.59	10	-1.3	13.7	-13.7	-1.2	19.5	0.00336	-1.8	-0.5	0.127761	0	0	0
ENSMUSG00000034518	HMGXB4	HMG box domain containing 4	NURF complex|	endosome to lysosome transport|Wnt signaling pathway|negative regulation of Wnt signaling pathway|	DNA binding|	10	1.1	8.43	8.43	10	1.7	13.7	13.7	1.5	19.5	0.00336	1	2.6	0.127761	0	0	0
ENSMUSG00000026787	GAD2	glutamate decarboxylase 2 (pancreatic islets and brain, 65kDa)	Golgi membrane|cytosol|plasma membrane|cell junction|axon|synaptic vesicle membrane|anchored component of membrane|presynaptic membrane|perinuclear region of cytoplasm|clathrin-sculpted gamma-aminobutyric acid transport vesicle membrane|	glutamate decarboxylation to succinate|synaptic transmission|neurotransmitter secretion|neurotransmitter biosynthetic process|response to drug|	glutamate decarboxylase activity|protein binding|glutamate binding|pyridoxal phosphate binding|protein heterodimerization activity|	10	-1	12	-12	10	-1.6	9.69	-9.69	-1.1	19.5	0.00336	-2.3	-0.7	0.127761	0	0	0
ENSMUSG00000021474	SFXN1	sideroflexin 1	mitochondrial inner membrane|integral component of membrane|	iron ion transport|erythrocyte differentiation|iron ion homeostasis|transmembrane transport|	cation transmembrane transporter activity|	10	0.5	11.7	11.7	10	0.7	8.55	8.55	0.6	19.5	0.00336	0.4	1	0.127761	0	0	0
ENSMUSG00000026644	ACBD7	acyl-CoA binding domain containing 7	None	None	fatty-acyl-CoA binding|lipid binding|	10	-0.7	11.9	-11.9	10	-0.8	8.12	-8.12	-0.8	19.5	0.00336	-1.3	-0.5	0.127761	0	0	0
ENSMUSG00000090472	GM3047	predicted gene 3047	cellular_component|	biological_process|	molecular_function|	8	0.6	13.8	13.8	7	0.8	6.47	6.47	0.6	19.5	0.00336	0.4	1.2	0.127761	0	0	0
ENSMUSG00000093752	GM20716	N/A	None	None	None	10	-0.7	14.6	-14.6	10	-0.6	5.5	-5.5	-0.7	19.5	0.00336	-1.2	-0.4	0.127761	0	0	0
ENSMUSG00000040481	BPTF	bromodomain PHD finger transcription factor	nucleus|nucleolus|cytoplasm|microtubule cytoskeleton|NURF complex|	negative regulation of transcription from RNA polymerase II promoter|embryonic placenta development|ATP catabolic process|chromatin remodeling|transcription, DNA-templated|regulation of transcription, DNA-templated|brain development|endoderm development|anterior/posterior pattern specification|positive regulation of transcription, DNA-templated|	protein binding|DNA-dependent ATPase activity|transcription factor binding|zinc ion binding|sequence-specific DNA binding|sequence-specific DNA binding|	10	-1	10.6	-10.6	10	-1.7	11.4	-11.4	-1.1	19.4	0.00349	-2.3	-0.7	0.130763	0	0	0
ENSMUSG00000029735	TPK1	thiamin pyrophosphokinase 1	cytosol|	vitamin metabolic process|water-soluble vitamin metabolic process|thiamine metabolic process|thiamine diphosphate biosynthetic process|phosphorylation|thiamine-containing compound metabolic process|small molecule metabolic process|	thiamine diphosphokinase activity|ATP binding|kinase activity|	10	0.5	9.12	9.12	10	0.7	11.2	11.2	0.6	19.4	0.00349	0.4	1.1	0.130763	0	0	0
ENSMUSG00000079637	RHOX2C	reproductive homeobox 2C	cellular_component|nucleus|	biological_process|	DNA binding|	10	1.3	9.45	9.45	10	1	10.8	10.8	1.2	19.4	0.00349	0.5	1.7	0.130763	0	0	0
ENSMUSG00000018412	KANSL1	KAT8 regulatory NSL complex subunit 1	histone acetyltransferase complex|nucleus|nucleoplasm|MLL1 complex|	chromatin organization|histone H4-K5 acetylation|histone H4-K8 acetylation|histone H4-K16 acetylation|	protein binding|histone acetyltransferase activity (H4-K5 specific)|histone acetyltransferase activity (H4-K8 specific)|histone acetyltransferase activity (H4-K16 specific)|	10	1.3	11.4	11.4	10	1.2	8.49	8.49	1.2	19.4	0.00349	0.8	1.8	0.130763	0	0	0
ENSMUSG00000025915	SGK3	serum/glucocorticoid regulated kinase family, member 3	None	None	None	10	-0.6	14.4	-14.4	10	-0.8	5.88	-5.88	-0.7	19.4	0.00349	-1.1	-0.4	0.130763	0	0	0
ENSMUSG00000014905	DNAJB9	DnaJ (Hsp40) homolog, subfamily B, member 9	nucleolus|cytoplasm|endoplasmic reticulum|endoplasmic reticulum lumen|endoplasmic reticulum membrane|extracellular vesicular exosome|	activation of signaling protein activity involved in unfolded protein response|ER-associated ubiquitin-dependent protein catabolic process|endoplasmic reticulum unfolded protein response|cellular protein metabolic process|	protein binding|misfolded protein binding|	10	-1.8	22	-22	10	1.1	5.54	5.54	-1.8	19.4	0.00349	-3	-0.5	0.130763	0	0	0
ENSMUSG00000070632	BTBD8	BTB (POZ) domain containing 8	nucleus|	None	None	10	-1.7	18.5	-18.5	10	-0.8	3.95	-3.95	-1.6	19.4	0.00349	-2.8	-1	0.130763	0	0	0
ENSMUSG00000027706	SEC62	SEC62 homolog (S. cerevisiae)	endoplasmic reticulum|endoplasmic reticulum membrane|rough endoplasmic reticulum|membrane|integral component of membrane|	cotranslational protein targeting to membrane|posttranslational protein targeting to membrane|	receptor activity|protein transporter activity|	10	0.6	16.7	16.7	10	0.8	3.12	3.12	0.7	19.4	0.00349	0.3	1.2	0.130763	0	0	0
ENSMUSG00000031781	CIAPIN1	cytokine induced apoptosis inhibitor 1	nucleus|nucleolus|cytoplasm|cytoplasm|mitochondrial intermembrane space|	apoptotic process|iron-sulfur cluster assembly|hemopoiesis|negative regulation of apoptotic process|small molecule metabolic process|	protein binding|electron carrier activity|metal ion binding|2 iron, 2 sulfur cluster binding|	10	1	17.1	17.1	10	0.8	2.83	2.83	1	19.4	0.00349	0.6	1.7	0.130763	0	0	0
ENSMUSG00000028840	ZFP593	zinc finger protein 593	nucleus|nucleolus|	transcription, DNA-templated|regulation of transcription, DNA-templated|biological_process|	DNA binding|metal ion binding|	10	-0.4	4.23	-4.23	10	-1.6	20.1	-20.1	-1.4	19.3	0.00358	-2.5	-0.6	0.131964	0	0	0
ENSMUSG00000074311	VMN1R139	vomeronasal 1 receptor 139	cellular_component|	biological_process|	molecular_function|	10	1.3	9.03	9.03	10	1	11.2	11.2	1.2	19.3	0.00358	0.7	1.8	0.131964	0	0	0
ENSMUSG00000074322	VMN1R132	vomeronasal 1 receptor 132	cellular_component|	biological_process|	molecular_function|	10	1.3	9.03	9.03	10	1	11.2	11.2	1.2	19.3	0.00358	0.7	1.8	0.131964	0	0	0
ENSMUSG00000051234	RNF7	ring finger protein 7	nucleus|nucleus|cytoplasm|cytoplasm|Cul5-RING ubiquitin ligase complex|	intrinsic apoptotic signaling pathway in response to oxidative stress|protein ubiquitination|negative regulation of apoptotic process|protein neddylation|response to redox state|	copper ion binding|protein binding|zinc ion binding|NEDD8 ligase activity|	10	-0.8	13	-13	10	-0.9	6.73	-6.73	-0.8	19.3	0.00358	-1.3	-0.5	0.131964	0	0	0
ENSMUSG00000060073	PSMA3	proteasome (prosome, macropain) subunit, alpha type, 3	proteasome complex|nucleus|nucleus|nucleoplasm|cytoplasm|cytosol|proteasome core complex|proteasome core complex, alpha-subunit complex|extracellular vesicular exosome|	G1/S transition of mitotic cell cycle|protein polyubiquitination|mitotic cell cycle|antigen processing and presentation of peptide antigen via MHC class I|antigen processing and presentation of exogenous peptide antigen via MHC class I, TAP-dependent|regulation of cellular amino acid metabolic process|apoptotic process|DNA damage response, signal transduction by p53 class mediator resulting in ce…	threonine-type endopeptidase activity|protein binding|	5	1.4	16.3	16.3	4	0.7	5.11	5.11	1.4	19.3	0.00358	0.9	2.6	0.131964	0	0	0
ENSMUSG00000032902	SLC16A1	solute carrier family 16 (monocarboxylate transporter), member 1	mitochondrion|centrosome|plasma membrane|plasma membrane|integral component of plasma membrane|integral component of plasma membrane|membrane|integral component of membrane|extracellular vesicular exosome|	pyruvate metabolic process|blood coagulation|monocarboxylic acid transport|mevalonate transport|plasma membrane lactate transport|cellular metabolic process|small molecule metabolic process|leukocyte migration|centrosome organization|transmembrane transport|cellular response to organic cyclic compound|	monocarboxylic acid transmembrane transporter activity|mevalonate transmembrane transporter activity|symporter activity|secondary active monocarboxylate transmembrane transporter activity|protein homodimerization activity|organic cyclic compound binding|	10	-0.9	19.6	-19.6	10	-0.3	1.32	-1.32	-0.9	19.3	0.00358	-1.4	-0.4	0.131964	0	0	0
ENSMUSG00000001228	UHRF1	ubiquitin-like with PHD and ring finger domains 1	nuclear chromatin|nuclear chromatin|euchromatin|heterochromatin|nucleus|replication fork|nuclear matrix|	negative regulation of transcription from RNA polymerase II promoter|DNA repair|transcription, DNA-templated|cell cycle|cell proliferation|maintenance of DNA methylation|histone monoubiquitination|histone ubiquitination|positive regulation of cellular protein metabolic process|protein ubiquitination involved in ubiquitin-dependent protein catabolic process|positive regulation of transcription fro…	core promoter proximal region sequence-specific DNA binding|sequence-specific DNA binding transcription factor activity|ubiquitin-protein transferase activity|ubiquitin-protein transferase activity|protein binding|zinc ion binding|methyl-CpG binding|ligase activity|nucleosomal histone binding|methylated histone binding|histone binding|identical protein binding|hemi-methylated DNA-binding|	9	0.5	7.11	7.11	9	1.1	16.4	16.4	0.9	19.2	0.00374	0.4	1.6	0.13639	0	0	0
ENSMUSG00000002949	TIMM44	translocase of inner mitochondrial membrane 44 homolog (yeast)	mitochondrion|mitochondrial inner membrane|mitochondrial matrix|	protein targeting to mitochondrion|cellular protein metabolic process|protein transmembrane transport|	protein binding|ATP binding|P-P-bond-hydrolysis-driven protein transmembrane transporter activity|	9	-0.9	10.6	-10.6	9	-1.6	11.2	-11.2	-1.1	19.2	0.00374	-2.3	-0.6	0.13639	0	0	0
ENSMUSG00000060681	SLC9A6	solute carrier family 9, subfamily A (NHE6, cation proton antiporter 6), member 6	endoplasmic reticulum membrane|plasma membrane|integral component of membrane|early endosome membrane|early endosome membrane|recycling endosome membrane|	transport|ion transport|regulation of pH|sodium ion transmembrane transport|sodium ion transmembrane transport|axon extension|neuron projection morphogenesis|transmembrane transport|dendrite extension|hydrogen ion transmembrane transport|	sodium:proton antiporter activity|	10	1.3	8.72	8.72	10	1.4	11	11	1.3	19.2	0.00374	0.9	2.4	0.13639	0	0	0
ENSMUSG00000044757	GM6430	heterogeneous nuclear ribonucleoprotein F pseudogene	None	None	None	9	1.3	12.3	12.3	9	0.8	8.78	8.78	1.2	19.2	0.00374	0.8	1.9	0.13639	0	0	0
ENSMUSG00000049327	SETD8	SET domain containing (lysine methyltransferase) 8	nucleus|nucleoplasm|chromosome|nucleolus|	negative regulation of transcription from RNA polymerase II promoter|mitotic cell cycle|transcription, DNA-templated|mitotic nuclear division|peptidyl-lysine monomethylation|histone lysine methylation|histone lysine methylation|regulation of DNA damage response, signal transduction by p53 class mediator|negative regulation of transcription, DNA-templated|	p53 binding|transcription corepressor activity|protein binding|protein-lysine N-methyltransferase activity|histone-lysine N-methyltransferase activity|	10	-1	16.4	-16.4	10	-0.9	3.25	-3.25	-1	19.2	0.00374	-1.6	-0.6	0.13639	0	0	0
ENSMUSG00000002307	DAXX	death-domain associated protein	chromosome, centromeric region|heterochromatin|nucleus|nucleus|nucleolus|cytoplasm|cytosol|PML body|PML body|SWI/SNF superfamily-type complex|	mitotic cytokinesis|positive regulation of protein phosphorylation|nucleosome assembly|chromatin remodeling|transcription, DNA-templated|regulation of transcription, DNA-templated|apoptotic process|activation of JUN kinase activity|extrinsic apoptotic signaling pathway via death domain receptors|viral process|androgen receptor signaling pathway|regulation of protein ubiquitination|positive regula…	p53 binding|transcription corepressor activity|receptor signaling protein activity|protein binding|transcription factor binding|enzyme binding|protein kinase binding|protein kinase activator activity|heat shock protein binding|ubiquitin protein ligase binding|histone binding|protein homodimerization activity|protein N-terminus binding|androgen receptor binding|	10	-1.9	22.4	-22.4	10	0.5	2.5	2.5	-1.9	19.2	0.00374	-3	-1.2	0.13639	0	0	0
ENSMUSG00000021178	PSMC1	proteasome (prosome, macropain) 26S subunit, ATPase, 1	proteasome complex|nucleus|nucleoplasm|cytoplasm|cytosol|membrane|proteasome accessory complex|	G1/S transition of mitotic cell cycle|protein polyubiquitination|mitotic cell cycle|antigen processing and presentation of peptide antigen via MHC class I|antigen processing and presentation of exogenous peptide antigen via MHC class I, TAP-dependent|ATP catabolic process|regulation of cellular amino acid metabolic process|apoptotic process|DNA damage response, signal transduction by p53 class me…	protein binding|ATP binding|ATPase activity|TBP-class protein binding|poly(A) RNA binding|	9	0.5	8.72	8.72	9	1.1	12.2	12.2	0.9	19.1	0.00385	0.5	1.5	0.138919	0	0	0
ENSMUSG00000032925	ITGBL1	integrin, beta-like 1 (with EGF-like repeat domains)	extracellular region|	cell adhesion|	None	10	0.8	9.6	9.6	10	0.7	10	10	0.8	19.1	0.00385	0.5	1.3	0.138919	0	0	0
ENSMUSG00000042492	TBC1D10B	TBC1 domain family, member 10B	cytoplasm|	regulation of Rab GTPase activity|positive regulation of Rab GTPase activity|positive regulation of Rab GTPase activity|	Rab GTPase activator activity|	9	0.6	15.2	15.2	9	1	5.17	5.17	0.7	19.1	0.00385	0.4	1.3	0.138919	0	0	0
ENSMUSG00000020513	TUBD1	tubulin, delta 1	nucleus|cytoplasm|centriole|microtubule|	GTP catabolic process|microtubule-based process|multicellular organismal development|spermatogenesis|cell differentiation|protein polymerization|	GTPase activity|structural constituent of cytoskeleton|GTP binding|	10	-1.5	15.1	-15.1	10	-0.9	4.98	-4.98	-0.9	19.1	0.00385	-1.9	-0.5	0.138919	0	0	0
ENSMUSG00000026032	NDUFB3	NADH dehydrogenase (ubiquinone) 1 beta subcomplex, 3, 12kDa	mitochondrial inner membrane|mitochondrial respiratory chain complex I|mitochondrial respiratory chain complex I|integral component of membrane|extracellular vesicular exosome|	mitochondrial electron transport, NADH to ubiquinone|respiratory electron transport chain|cellular metabolic process|small molecule metabolic process|	NADH dehydrogenase (ubiquinone) activity|	10	0.8	16	16	9	1	3.52	3.52	1	19.1	0.00385	0.5	1.5	0.138919	0	0	0
ENSMUSG00000006373	PGRMC1	progesterone receptor membrane component 1	nucleolus|endoplasmic reticulum|endoplasmic reticulum membrane|membrane|integral component of membrane|extracellular vesicular exosome|	axon guidance|	steroid binding|protein binding|heme binding|	10	-0.5	8.71	-8.71	10	-1	13.1	-13.1	-0.7	19	0.00403	-1.3	-0.4	0.144145	0	0	0
ENSMUSG00000039130	ZC3HC1	zinc finger, C3HC-type containing 1	nucleus|nuclear membrane|	mitotic nuclear division|protein ubiquitination|negative regulation of extrinsic apoptotic signaling pathway in absence of ligand|	protein binding|zinc ion binding|protein kinase binding|	10	-0.8	13.2	-13.2	10	-1.7	6.38	-6.38	-0.8	19	0.00403	-1.6	-0.4	0.144145	0	0	0
ENSMUSG00000002963	PNKP	polynucleotide kinase 3'-phosphatase	nucleus|nucleolus|membrane|	nucleotide-excision repair, DNA damage removal|DNA-dependent DNA replication|DNA repair|response to oxidative stress|response to radiation|response to radiation|dephosphorylation|DNA damage response, detection of DNA damage|DNA damage response, detection of DNA damage|nucleotide phosphorylation|nucleic acid phosphodiester bond hydrolysis|polynucleotide 3' dephosphorylation|polynucleotide 3' depho…	damaged DNA binding|double-stranded DNA binding|endonuclease activity|protein binding|ATP binding|purine nucleotide binding|nucleotide kinase activity|polynucleotide 3'-phosphatase activity|ATP-dependent polydeoxyribonucleotide 5'-hydroxyl-kinase activity|	8	1.3	14.2	14.2	8	0.8	5.84	5.84	1.1	19	0.00403	0.5	1.7	0.144145	0	0	0
ENSMUSG00000035692	ISG15	ISG15 ubiquitin-like modifier	extracellular region|cytosol|	viral process|cytokine-mediated signaling pathway|modification-dependent protein catabolic process|negative regulation of protein ubiquitination|ISG15-protein conjugation|ISG15-protein conjugation|negative regulation of type I interferon production|regulation of interferon-gamma production|response to type I interferon|defense response to bacterium|negative regulation of viral genome replication|…	protein binding|protein tag|	10	-2	18.5	-18.5	10	0.6	2.72	2.72	-2	19	0.00403	-4	-1.2	0.144145	0	0	0
ENSMUSG00000024947	MEN1	multiple endocrine neoplasia I	chromatin|nucleus|nucleoplasm|cytoplasm|cytosol|nuclear matrix|cleavage furrow|histone methyltransferase complex|histone methyltransferase complex|protein complex|	negative regulation of transcription from RNA polymerase II promoter|MAPK cascade|leukocyte homeostasis|negative regulation of protein phosphorylation|osteoblast fate commitment|osteoblast development|DNA repair|chromatin remodeling|transcription, DNA-templated|transcription initiation from RNA polymerase II promoter|cellular response to DNA damage stimulus|cell cycle arrest|transforming growth f…	four-way junction DNA binding|Y-form DNA binding|chromatin binding|double-stranded DNA binding|protein binding|histone-lysine N-methyltransferase activity|protein binding, bridging|sequence-specific DNA binding|transcription regulatory region DNA binding|protein N-terminus binding|R-SMAD binding|	10	-1.1	19.2	-19.2	10	-0.5	2.56	-2.56	-1	19	0.00403	-1.6	-0.5	0.144145	0	0	0
ENSMUSG00000029580	ACTB	actin, beta	nuclear chromatin|extracellular space|nucleoplasm|cytoplasm|cytosol|cytoskeleton|postsynaptic density|membrane|axon|ribonucleoprotein complex|cortical cytoskeleton|NuA4 histone acetyltransferase complex|cytoplasmic ribonucleoprotein granule|protein complex|extracellular vesicular exosome|MLL5-L complex|blood microparticle|	retina homeostasis|chromatin organization|protein folding|cellular component movement|axon guidance|blood coagulation|substantia nigra development|cell junction assembly|adherens junction organization|Fc-gamma receptor signaling pathway involved in phagocytosis|ATP-dependent chromatin remodeling|cellular protein metabolic process|innate immune response|cell-cell junction organization|'de novo' po…	RNA polymerase II core promoter proximal region sequence-specific DNA binding|RNA polymerase II distal enhancer sequence-specific DNA binding|structural constituent of cytoskeleton|protein binding|ATP binding|kinesin binding|protein kinase binding|Tat protein binding|nucleosomal DNA binding|nitric-oxide synthase binding|	6	-1.3	18	-18	6	-0.8	2	-2	-1.1	19	0.00403	-1.9	-0.7	0.144145	0	0	0
ENSMUSG00000012519	MLKL	mixed lineage kinase domain-like	cytoplasm|plasma membrane|	protein phosphorylation|protein homotrimerization|necroptotic process|	protein binding|ATP binding|protein complex binding|	10	1.1	6.32	6.32	10	2.1	15.3	15.3	1.9	18.9	0.00415	0.8	3.5	0.146899	0	0	0
ENSMUSG00000038155	GSTP2	glutathione S-transferase, pi 2	extracellular space|intracellular|nucleus|cytoplasm|mitochondrion|cytosol|plasma membrane|extracellular vesicular exosome|TRAF2-GSTP1 complex|	glutathione metabolic process|metabolic process|	glutathione transferase activity|glutathione transferase activity|drug binding|transferase activity|S-nitrosoglutathione binding|dinitrosyl-iron complex binding|glutathione binding|	10	1	5.99	5.99	10	1.1	13.4	13.4	1.1	18.9	0.00415	0.6	1.9	0.146899	0	0	0
ENSMUSG00000040010	SLC7A5	solute carrier family 7 (amino acid transporter light chain, L system), member 5	nucleus|nucleolus|cytosol|plasma membrane|plasma membrane|membrane|integral component of membrane|apical plasma membrane|extracellular vesicular exosome|	cellular amino acid metabolic process|transport|ion transport|amino acid transport|nervous system development|blood coagulation|neutral amino acid transport|cell differentiation|leukocyte migration|transmembrane transport|L-alpha-amino acid transmembrane transport|	amino acid transmembrane transporter activity|neutral amino acid transmembrane transporter activity|L-amino acid transmembrane transporter activity|peptide antigen binding|	10	-2.3	17.8	-17.8	10	-1.8	2.13	-2.13	-2.3	18.9	0.00415	-4	-1.8	0.146899	0	0	0
ENSMUSG00000022858	TRA2B	transformer 2 beta homolog (Drosophila)	nucleus|	RNA splicing, via transesterification reactions|regulation of alternative mRNA splicing, via spliceosome|mRNA splicing, via spliceosome|positive regulation of mRNA splicing, via spliceosome|	nucleotide binding|mRNA binding|protein binding|poly(A) RNA binding|	10	1.1	21.2	21.2	10	0.2	0.638	0.638	1.1	18.9	0.00415	0.7	1.8	0.146899	0	0	0
ENSMUSG00000089762	IER5L	immediate early response 5-like	None	None	None	10	-1.1	7.97	-7.97	10	-1.8	13.4	-13.4	-1.5	18.8	0.00424	-2.5	-0.8	0.149055	0	0	0
ENSMUSG00000040274	CDK6	cyclin-dependent kinase 6	cyclin-dependent protein kinase holoenzyme complex|ruffle|nucleus|cytoplasm|cytosol|	G1/S transition of mitotic cell cycle|mitotic cell cycle|positive regulation of cell-matrix adhesion|type B pancreatic cell development|protein phosphorylation|cell cycle arrest|negative regulation of cell proliferation|response to virus|regulation of gene expression|regulation of gene expression|astrocyte development|dentate gyrus development|lateral ventricle development|gliogenesis|cell dediff…	cyclin-dependent protein serine/threonine kinase activity|protein binding|ATP binding|cyclin binding|	7	0.8	8.54	8.54	7	1.1	11.7	11.7	0.9	18.8	0.00424	0.6	1.7	0.149055	0	0	0
ENSMUSG00000001025	S100A6	S100 calcium binding protein A6	ruffle|nucleus|nuclear envelope|nuclear envelope|cytoplasm|cytoplasm|cytosol|extrinsic component of cytoplasmic side of plasma membrane|perinuclear region of cytoplasm|extracellular vesicular exosome|	signal transduction|axonogenesis|ion transmembrane transport|positive regulation of fibroblast proliferation|	calcium ion binding|calcium ion binding|protein binding|tropomyosin binding|zinc ion binding|ion transmembrane transporter activity|protein homodimerization activity|protein homodimerization activity|S100 protein binding|calcium-dependent protein binding|	10	0.9	11	11	10	1.1	8.48	8.48	0.9	18.8	0.00424	0.6	1.7	0.149055	0	0	0
ENSMUSG00000003500	IMPDH1	IMP (inosine 5'-monophosphate) dehydrogenase 1	nucleus|cytoplasm|cytosol|	purine nucleobase metabolic process|GMP biosynthetic process|purine ribonucleoside monophosphate biosynthetic process|small molecule metabolic process|lymphocyte proliferation|nucleobase-containing small molecule metabolic process|oxidation-reduction process|	nucleic acid binding|DNA binding|RNA binding|IMP dehydrogenase activity|adenyl nucleotide binding|metal ion binding|	10	1.3	12.6	12.6	10	0.9	7.19	7.19	1	18.8	0.00424	0.6	1.7	0.149055	0	0	0
ENSMUSG00000011837	SNAPC2	small nuclear RNA activating complex, polypeptide 2, 45kDa	nucleus|nucleoplasm|cytoplasm|	regulation of transcription, DNA-templated|transcription from RNA polymerase II promoter|transcription from RNA polymerase III promoter|snRNA transcription|gene expression|	sequence-specific DNA binding transcription factor activity|	9	-0.9	14.8	-14.8	9	-0.7	4.83	-4.83	-0.9	18.8	0.00424	-1.4	-0.5	0.149055	0	0	0
ENSMUSG00000005198	POLR2A	polymerase (RNA) II (DNA directed) polypeptide A, 220kDa	nucleus|nucleus|nucleoplasm|DNA-directed RNA polymerase II, core complex|	mRNA splicing, via spliceosome|transcription, RNA-templated|DNA repair|transcription-coupled nucleotide-excision repair|nucleotide-excision repair|regulation of transcription, DNA-templated|transcription from RNA polymerase II promoter|transcription from RNA polymerase II promoter|transcription from RNA polymerase II promoter|transcription initiation from RNA polymerase II promoter|transcription …	RNA polymerase II activity|DNA binding|DNA-directed RNA polymerase activity|RNA-directed RNA polymerase activity|protein binding|protein binding|ubiquitin protein ligase binding|poly(A) RNA binding|metal ion binding|	9	1.8	19.9	19.9	7	0.6	1.06	1.06	1.8	18.8	0.00424	1.1	3	0.149055	0	0	0
ENSMUSG00000069301	HIST1H2AG	histone cluster 1, H2ag	nucleosome|nucleus|extracellular vesicular exosome|	nucleosome assembly|biological_process|	DNA binding|protein binding|enzyme binding|protein heterodimerization activity|	9	-1.4	10.2	-10.2	9	1.3	14.1	14.1	1.3	18.7	0.0043	0.8	2.5	0.149624	0	0	0
ENSMUSG00000040877	WDR25	WD repeat domain 25	None	None	None	10	0.7	11.8	11.8	10	1	8.31	8.31	0.8	18.7	0.0043	0.4	1.3	0.149624	0	0	0
ENSMUSG00000024983	VTI1A	vesicle transport through interaction with t-SNAREs 1A	Golgi membrane|Golgi apparatus|integral component of membrane|cytoplasmic membrane-bounded vesicle|SNARE complex|	intracellular protein transport|retrograde transport, endosome to Golgi|retrograde transport, endosome to Golgi|	SNAP receptor activity|	10	-0.8	15.7	-15.7	10	-0.6	3.44	-3.44	-0.7	18.7	0.0043	-1.6	-0.5	0.149624	0	0	0
ENSMUSG00000035834	POLR3G	polymerase (RNA) III (DNA directed) polypeptide G (32kD)	nuclear chromatin|nucleoplasm|DNA-directed RNA polymerase III complex|cytosol|	regulation of transcription from RNA polymerase III promoter|transcription from RNA polymerase III promoter|transcription initiation from RNA polymerase III promoter|transcription elongation from RNA polymerase III promoter|termination of RNA polymerase III transcription|cell proliferation|cell proliferation|gene expression|positive regulation of type I interferon production|positive regulation o…	RNA polymerase III activity|DNA-directed RNA polymerase activity|	10	1.9	21.4	21.4	10	-0.7	0.968	-0.968	1.9	18.7	0.0043	1.3	3	0.149624	0	0	0
ENSMUSG00000030057	CNBP	CCHC-type zinc finger, nucleic acid binding protein	nucleus|endoplasmic reticulum|cytosol|	transcription, DNA-templated|regulation of transcription, DNA-templated|cholesterol biosynthetic process|positive regulation of cell proliferation|positive regulation of transcription, DNA-templated|positive regulation of transcription from RNA polymerase II promoter|	single-stranded DNA binding|sequence-specific DNA binding transcription factor activity|single-stranded RNA binding|protein binding|zinc ion binding|poly(A) RNA binding|	10	0.5	11	11	10	0.7	8.61	8.61	0.6	18.6	0.00437	0.4	1	0.151034	0	0	0
ENSMUSG00000055319	SEC23IP	SEC23 interacting protein	cytoplasm|endoplasmic reticulum|endoplasmic reticulum-Golgi intermediate compartment|ER to Golgi transport vesicle membrane|intracellular membrane-bounded organelle|	intracellular protein transport|Golgi organization|	poly(A) RNA binding|metal ion binding|	10	-0.6	13.9	-13.9	10	-1.5	6.19	-6.19	-0.7	18.6	0.00437	-1.5	-0.4	0.151034	0	0	0
ENSMUSG00000040888	GFER	growth factor, augmenter of liver regeneration	extracellular region|cytoplasm|mitochondrion|mitochondrial intermembrane space|	protein targeting to mitochondrion|cellular protein metabolic process|oxidation-reduction process|	protein binding|growth factor activity|protein disulfide oxidoreductase activity|thiol oxidase activity|flavin adenine dinucleotide binding|	8	0.8	14.2	14.2	8	1.2	5.53	5.53	0.9	18.6	0.00437	0.5	1.6	0.151034	0	0	0
ENSMUSG00000025403	SHMT2	serine hydroxymethyltransferase 2 (mitochondrial)	mitochondrion|mitochondrial inner membrane|mitochondrial intermembrane space|mitochondrial matrix|microtubule cytoskeleton|mitochondrial nucleoid|extracellular vesicular exosome|	L-serine biosynthetic process|one-carbon metabolic process|positive regulation of cell proliferation|glycine biosynthetic process from serine|tetrahydrofolate interconversion|protein homotetramerization|	chromatin binding|glycine hydroxymethyltransferase activity|L-allo-threonine aldolase activity|amino acid binding|pyridoxal phosphate binding|identical protein binding|	9	1.1	16.8	16.8	8	0.5	2.87	2.87	0.6	18.6	0.00437	0.4	1.5	0.151034	0	0	0
ENSMUSG00000026926	PMPCA	peptidase (mitochondrial processing) alpha	extracellular space|mitochondrion|mitochondrial inner membrane|mitochondrial matrix|	proteolysis|protein targeting to mitochondrion|cellular protein metabolic process|	metalloendopeptidase activity|metal ion binding|	7	1.1	6.31	6.31	8	1.1	12.6	12.6	1.1	18.5	0.0044	0.7	2.1	0.151052	0	0	0
ENSMUSG00000003660	SNRNP200	small nuclear ribonucleoprotein 200kDa (U5)	nucleus|nucleoplasm|spliceosomal complex|U5 snRNP|membrane|catalytic step 2 spliceosome|	cis assembly of pre-catalytic spliceosome|mRNA splicing, via spliceosome|mRNA splicing, via spliceosome|mRNA splicing, via spliceosome|osteoblast differentiation|ATP catabolic process|RNA splicing|gene expression|	ATP-dependent RNA helicase activity|protein binding|ATP binding|ATP-dependent helicase activity|identical protein binding|poly(A) RNA binding|	4	0.7	9.18	9.18	4	1.3	11.5	11.5	1.1	18.5	0.0044	0.5	2.3	0.151052	0	0	0
ENSMUSG00000024128	SBP	spermine binding protein	extracellular region|	biological_process|	molecular_function|	10	1	8.94	8.94	10	1.3	10.7	10.7	1.1	18.5	0.0044	0.6	2	0.151052	0	0	0
ENSMUSG00000079031	BB287469	expressed sequence BB287469	None	None	None	10	1.2	10.1	10.1	10	0.7	10.5	10.5	0.9	18.5	0.0044	0.5	1.6	0.151052	0	0	0
ENSMUSG00000092019	GM4027	predicted gene 4027	cellular_component|	biological_process|	molecular_function|	10	1.2	10.1	10.1	10	0.7	10.5	10.5	0.9	18.5	0.0044	0.5	1.6	0.151052	0	0	0
ENSMUSG00000042073	ABHD14B	abhydrolase domain containing 14B	nucleus|nucleolus|cytoplasm|cytosol|extracellular vesicular exosome|	metabolic process|metabolic process|positive regulation of transcription from RNA polymerase II promoter|	protein binding|hydrolase activity|	10	-0.9	10.1	-10.1	10	-1.2	9.58	-9.58	-1	18.5	0.0044	-1.7	-0.6	0.151052	0	0	0
ENSMUSG00000039849	PCIF1	PDX1 C-terminal inhibiting factor 1	nucleus|microtubule cytoskeleton|intercellular bridge|	negative regulation of phosphatase activity|	None	9	0.8	11.3	11.3	9	1	7.71	7.71	0.9	18.5	0.0044	0.5	1.5	0.151052	0	0	0
ENSMUSG00000042569	DHRS7B	dehydrogenase/reductase (SDR family) member 7B	cellular_component|endoplasmic reticulum membrane|membrane|integral component of membrane|	biological_process|oxidation-reduction process|	molecular_function|oxidoreductase activity|	10	-1	12.3	-12.3	10	-1.4	6.97	-6.97	-1.1	18.5	0.0044	-1.8	-0.5	0.151052	0	0	0
ENSMUSG00000059089	FCGR4	Fc receptor, IgG, low affinity IV	external side of plasma membrane|cell surface|membrane|integral component of membrane|extracellular vesicular exosome|	NK T cell proliferation|regulation of sensory perception of pain|cellular response to lipopolysaccharide|	None	10	0.6	14.8	14.8	10	0.8	4.56	4.56	0.6	18.5	0.0044	0.4	1.1	0.151052	0	0	0
ENSMUSG00000020349	PPP2CA	protein phosphatase 2, catalytic subunit, alpha isozyme	protein phosphatase type 2A complex|protein phosphatase type 2A complex|chromosome, centromeric region|spindle pole|nucleus|mitochondrion|cytosol|plasma membrane|microtubule cytoskeleton|membrane|extracellular vesicular exosome|	nuclear-transcribed mRNA catabolic process, nonsense-mediated decay|inactivation of MAPK activity|mitotic cell cycle|regulation of DNA replication|regulation of transcription, DNA-templated|protein dephosphorylation|ceramide metabolic process|apoptotic process|mitotic nuclear envelope reassembly|meiotic nuclear division|mesoderm development|RNA splicing|fibroblast growth factor receptor signaling…	protein serine/threonine phosphatase activity|protein binding|protein C-terminus binding|metal ion binding|protein dimerization activity|	8	-1.3	15.9	-15.9	8	-2	4.38	-4.38	-1.4	18.5	0.0044	-3	-0.9	0.151052	0	0	0
ENSMUSG00000024002	BRD4	bromodomain containing 4	nuclear chromatin|condensed nuclear chromosome|nucleus|chromosome|cytoplasm|	regulation of transcription involved in G1/S transition of mitotic cell cycle|inner cell mass cell proliferation|chromatin remodeling|transcription, DNA-templated|protein phosphorylation|cellular response to DNA damage stimulus|cellular response to DNA damage stimulus|chromosome segregation|positive regulation of G2/M transition of mitotic cell cycle|viral process|positive regulation of transcrip…	p53 binding|DNA binding|chromatin binding|protein binding|lysine-acetylated histone binding|	10	1.1	16.1	16.1	9	0.7	3.35	3.35	0.9	18.5	0.0044	0.5	1.6	0.151052	0	0	0
ENSMUSG00000025355	MMP19	matrix metallopeptidase 19	extracellular region|proteinaceous extracellular matrix|	angiogenesis|ovarian follicle development|ovulation from ovarian follicle|luteolysis|proteolysis|response to hormone|extracellular matrix disassembly|cell differentiation|extracellular matrix organization|collagen catabolic process|response to cAMP|	metalloendopeptidase activity|calcium ion binding|zinc ion binding|	9	0.7	7.63	7.63	10	1.2	13.7	13.7	1.1	18.4	0.0045	0.6	1.9	0.15169	0	0	0
ENSMUSG00000027968	LARP7	La ribonucleoprotein domain family, member 7	nucleus|nucleoplasm|cytoplasm|Golgi apparatus|ribonucleoprotein complex|	RNA processing|	nucleotide binding|protein binding|poly(A) RNA binding|	10	-1.6	9.67	-9.67	10	-2.1	9.6	-9.6	-1.7	18.4	0.0045	-3.3	-1.1	0.15169	0	0	0
ENSMUSG00000025809	ITGB1	integrin, beta 1 (fibronectin receptor, beta polypeptide, antigen CD29 includes MDF2, MSK12)	acrosomal vesicle|ruffle|basement membrane|cytoplasm|plasma membrane|plasma membrane|focal adhesion|focal adhesion|integrin complex|external side of plasma membrane|cell surface|intercalated disc|membrane|lamellipodium|hemidesmosome|filopodium|neuromuscular junction|cleavage furrow|ruffle membrane|integrin alpha3-beta1 complex|integrin alpha7-beta1 complex|integrin alpha8-beta1 complex|integrin a…	G1/S transition of mitotic cell cycle|in utero embryonic development|cell fate specification|tissue homeostasis|cell migration involved in sprouting angiogenesis|cellular calcium ion homeostasis|cellular defense response|homophilic cell adhesion|leukocyte cell-cell adhesion|cell-matrix adhesion|calcium-independent cell-matrix adhesion|integrin-mediated signaling pathway|axon guidance|blood coagul…	virus receptor activity|glycoprotein binding|fibronectin binding|protease binding|actin binding|integrin binding|protein binding|collagen binding|protein kinase binding|protein domain specific binding|peptide binding|laminin binding|metal ion binding|protein heterodimerization activity|cell adhesion molecule binding|alpha-actinin binding|	10	-1.6	11.2	-11.2	10	-1.3	7.8	-7.8	-1.5	18.4	0.0045	-2.5	-0.8	0.15169	0	0	0
ENSMUSG00000051232	TMEM199	transmembrane protein 199	integral component of membrane|	None	None	10	-0.7	12.2	-12.2	10	-0.8	6.56	-6.56	-0.8	18.4	0.0045	-1.3	-0.5	0.15169	0	0	0
ENSMUSG00000096901	GM3029	predicted gene 3029	cellular_component|	biological_process|	molecular_function|	10	0.6	13.8	13.8	9	0.8	5.22	5.22	0.6	18.4	0.0045	0.4	1.1	0.15169	0	0	0
ENSMUSG00000027109	SP3	Sp3 transcription factor	nucleus|PML body|transcriptional repressor complex|	negative regulation of transcription from RNA polymerase II promoter|ossification|natural killer cell differentiation|trophectodermal cell differentiation|liver development|embryonic placenta development|transcription, DNA-templated|regulation of transcription, DNA-templated|B cell differentiation|T cell differentiation|megakaryocyte differentiation|monocyte differentiation|lung development|granu…	RNA polymerase II core promoter sequence-specific DNA binding|core promoter proximal region sequence-specific DNA binding|RNA polymerase II core promoter proximal region sequence-specific DNA binding transcription factor activity involved in negative regulation of transcription|chromatin binding|double-stranded DNA binding|protein binding|metal ion binding|	10	0.9	14.6	14.6	10	1	4.15	4.15	0.9	18.4	0.0045	0.5	1.5	0.15169	0	0	0
ENSMUSG00000018707	DYNC1H1	dynein, cytoplasmic 1, heavy chain 1	centrosome|cytosol|cytoplasmic dynein complex|microtubule|membrane|extracellular vesicular exosome|	G2/M transition of mitotic cell cycle|mitotic cell cycle|ATP catabolic process|transport|microtubule-based movement|mitotic spindle organization|cell death|antigen processing and presentation of exogenous peptide antigen via MHC class II|cytoplasmic mRNA processing body assembly|stress granule assembly|	microtubule motor activity|protein binding|ATP binding|ATPase activity|poly(A) RNA binding|	9	0.7	7.84	7.84	8	1.2	13.1	13.1	1	18.3	0.00459	0.6	1.7	0.153212	0	0	0
ENSMUSG00000023852	CHD1	chromodomain helicase DNA binding protein 1	nucleus|cytoplasm|	chromatin remodeling|transcription, DNA-templated|regulation of transcription from RNA polymerase II promoter|DNA duplex unwinding|	DNA binding|ATP-dependent DNA helicase activity|protein binding|ATP binding|methylated histone binding|	10	0.9	10.6	10.6	10	1.1	8.39	8.39	0.9	18.3	0.00459	0.6	1.6	0.153212	0	0	0
ENSMUSG00000024077	STRN	striatin, calmodulin binding protein	protein phosphatase type 2A complex|cytoplasm|tight junction|postsynaptic density|membrane|neuronal cell body|dendritic spine|postsynaptic membrane|	locomotory behavior|negative regulation of cell proliferation|Wnt signaling pathway|dendrite development|tight junction assembly|	protein binding|calmodulin binding|calmodulin binding|estrogen receptor binding|protein complex binding|protein phosphatase 2A binding|armadillo repeat domain binding|	10	-0.7	11.9	-11.9	10	-1.3	8.23	-8.23	-0.8	18.3	0.00459	-1.6	-0.5	0.153212	0	0	0
ENSMUSG00000015748	PRPF3	pre-mRNA processing factor 3	nucleus|spliceosomal complex|cytoplasm|Cajal body|nuclear speck|U4/U6 x U5 tri-snRNP complex|	RNA splicing, via transesterification reactions|mRNA splicing, via spliceosome|mRNA processing|RNA splicing|	protein binding|identical protein binding|poly(A) RNA binding|	9	0.7	12.1	12.1	9	1.2	7.64	7.64	1	18.3	0.00459	0.5	1.8	0.153212	0	0	0
ENSMUSG00000026466	TOR1AIP1	torsin A interacting protein 1	nucleus|nuclear inner membrane|integral component of membrane|	positive regulation of ATPase activity|	ATPase activator activity|cytoskeletal protein binding|ATPase binding|	10	-1.1	11.9	-11.9	10	-1.6	7.24	-7.24	-1.1	18.3	0.00459	-2.2	-0.7	0.153212	0	0	0
ENSMUSG00000015994	FNTA	farnesyltransferase, CAAX box, alpha	cytoplasm|cytosol|microtubule associated complex|CAAX-protein geranylgeranyltransferase complex|protein farnesyltransferase complex|	apoptotic process|cellular component disassembly involved in execution phase of apoptosis|transforming growth factor beta receptor signaling pathway|phototransduction, visible light|rhodopsin mediated signaling pathway|protein farnesylation|protein geranylgeranylation|regulation of rhodopsin mediated signaling pathway|positive regulation of tubulin deacetylation|positive regulation of deacetylase…	protein farnesyltransferase activity|protein farnesyltransferase activity|protein geranylgeranyltransferase activity|CAAX-protein geranylgeranyltransferase activity|protein binding|microtubule binding|alpha-tubulin binding|	9	-2.2	15.6	-15.6	8	-1.1	5.72	-5.72	-2.1	18.3	0.00459	-3.2	-0.9	0.153212	0	0	0
ENSMUSG00000033721	VAV3	vav 3 guanine nucleotide exchange factor	cytosol|plasma membrane|extracellular vesicular exosome|	angiogenesis|vesicle fusion|cellular response to DNA damage stimulus|integrin-mediated signaling pathway|small GTPase mediated signal transduction|blood coagulation|positive regulation of signal transduction|cell migration|lamellipodium assembly|platelet activation|positive regulation of B cell proliferation|positive regulation of Rac GTPase activity|Fc-epsilon receptor signaling pathway|Fc-gamma…	SH3/SH2 adaptor activity|guanyl-nucleotide exchange factor activity|guanyl-nucleotide exchange factor activity|GTPase activator activity|epidermal growth factor receptor binding|protein binding|Rac guanyl-nucleotide exchange factor activity|metal ion binding|	10	1.2	11.7	11.7	10	2.2	10.1	10.1	2	18.2	0.00467	1	3.5	0.154374	0	0	0
ENSMUSG00000062044	LMTK3	lemur tyrosine kinase 3	cellular_component|integral component of membrane|	negative regulation of phosphatase activity|peptidyl-tyrosine phosphorylation|	molecular_function|protein serine/threonine kinase activity|protein tyrosine kinase activity|ATP binding|	10	-0.9	8.67	-8.67	10	-0.8	10	-10	-0.9	18.2	0.00467	-1.3	-0.4	0.154374	0	0	0
ENSMUSG00000002778	KDELR1	KDEL (Lys-Asp-Glu-Leu) endoplasmic reticulum protein retention receptor 1	endoplasmic reticulum membrane|endoplasmic reticulum-Golgi intermediate compartment|cis-Golgi network|membrane|integral component of membrane|COPI-coated vesicle membrane|endoplasmic reticulum-Golgi intermediate compartment membrane|	protein retention in ER lumen|intracellular protein transport|vesicle-mediated transport|	KDEL sequence binding|	9	1.3	10.1	10.1	9	1.5	8.67	8.67	1.3	18.2	0.00467	0.9	2.5	0.154374	0	0	0
ENSMUSG00000001569	NOM1	nucleolar protein with MIF4G domain 1	nucleus|nucleolus|	biological_process|	protein binding|poly(A) RNA binding|	8	-1.5	13.4	-13.4	7	-0.9	6.3	-6.3	-1.2	18.2	0.00467	-2.2	-0.7	0.154374	0	0	0
ENSMUSG00000029036	ATAD3A	ATPase family, AAA domain containing 3A	mitochondrion|mitochondrial inner membrane|integral component of membrane|mitochondrial nucleoid|	metabolic process|cell growth|negative regulation of apoptotic process|	ATP binding|nucleoside-triphosphatase activity|	10	0.7	13.8	13.8	10	0.4	5.23	5.23	0.6	18.2	0.00467	0.4	1	0.154374	0	0	0
ENSMUSG00000022570	TSTA3	tissue specific transplantation antigen P35B	cytoplasm|extracellular vesicular exosome|	leukocyte cell-cell adhesion|GDP-mannose metabolic process|cytolysis|'de novo' GDP-L-fucose biosynthetic process|'de novo' GDP-L-fucose biosynthetic process|'de novo' GDP-L-fucose biosynthetic process|oxidation-reduction process|	electron carrier activity|isomerase activity|GDP-4-dehydro-D-rhamnose reductase activity|GDP-L-fucose synthase activity|coenzyme binding|	10	-0.7	8.52	-8.52	10	-1.8	15	-15	-1.5	18.1	0.0048	-2.4	-0.6	0.157402	0	0	0
ENSMUSG00000027349	FAM98B	family with sequence similarity 98, member B	tRNA-splicing ligase complex|	None	poly(A) RNA binding|	10	0.4	8.37	8.37	10	0.7	10.8	10.8	0.5	18.1	0.0048	0.3	0.9	0.157402	0	0	0
ENSMUSG00000028098	RNF115	ring finger protein 115	cytosol|	protein autoubiquitination|	ubiquitin-protein transferase activity|protein binding|zinc ion binding|ligase activity|	10	-0.7	12.3	-12.3	10	-0.9	6.19	-6.19	-0.9	18.1	0.0048	-1.5	-0.5	0.157402	0	0	0
ENSMUSG00000062808	HIST1H3D	histone cluster 1, H3d	None	None	None	9	0.6	15.1	15.1	9	1.2	4.8	4.8	0.6	18.1	0.0048	0.4	1.4	0.157402	0	0	0
ENSMUSG00000045983	EIF4G1	eukaryotic translation initiation factor 4 gamma, 1	cytosol|membrane|eukaryotic translation initiation factor 4F complex|	nuclear-transcribed mRNA catabolic process, nonsense-mediated decay|nuclear-transcribed mRNA catabolic process, deadenylation-dependent decay|nuclear-transcribed mRNA poly(A) tail shortening|translation|translational initiation|regulation of translational initiation|regulation of translational initiation|cell death|insulin receptor signaling pathway|gene expression|viral process|RNA metabolic pro…	translation initiation factor activity|protein binding|translation factor activity, nucleic acid binding|poly(A) RNA binding|	10	0.6	9.67	9.67	10	0.9	9.73	9.73	0.7	18	0.00488	0.4	1.2	0.159007	0	0	0
ENSMUSG00000055780	USP26	ubiquitin specific peptidase 26	nucleus|	ubiquitin-dependent protein catabolic process|protein deubiquitination|	protein binding|cysteine-type peptidase activity|ubiquitinyl hydrolase activity|	10	0.7	11.8	11.8	10	0.7	6.66	6.66	0.7	18	0.00488	0.5	1.2	0.159007	0	0	0
ENSMUSG00000050043	TMX2	thioredoxin-related transmembrane protein 2	cellular_component|integral component of membrane|	biological_process|cell redox homeostasis|	molecular_function|	10	1.3	15.2	15.2	10	-0.9	3.75	-3.75	1.2	18	0.00488	0.9	1.9	0.159007	0	0	0
ENSMUSG00000096674	MUP15	major urinary protein 15	cellular_component|extracellular region|	biological_process|	molecular_function|	10	1.1	5.37	5.37	10	0.8	13.6	13.6	0.9	17.9	0.00493	0.5	1.5	0.159874	0	0	0
ENSMUSG00000020380	RAD50	RAD50 homolog (S. cerevisiae)	nuclear chromosome, telomeric region|nucleus|nucleoplasm|membrane|Mre11 complex|site of double-strand break|pronucleus|	regulation of mitotic recombination|telomere maintenance|double-strand break repair via homologous recombination|DNA catabolic process, endonucleolytic|DNA repair|DNA repair|double-strand break repair|double-strand break repair|DNA recombination|cellular response to DNA damage stimulus|telomere maintenance via telomerase|reciprocal meiotic recombination|positive regulation of protein autophosphor…	single-stranded DNA endodeoxyribonuclease activity|DNA binding|ATP-dependent DNA helicase activity|protein binding|ATP binding|zinc ion binding|3'-5' exonuclease activity|protein binding, bridging|	10	1	6.03	6.03	10	1.3	12.9	12.9	1.2	17.9	0.00493	0.8	2.3	0.159874	0	0	0
ENSMUSG00000021520	UQCRB	ubiquinol-cytochrome c reductase binding protein	mitochondrial inner membrane|mitochondrial respiratory chain|mitochondrial respiratory chain complex III|	oxidative phosphorylation|mitochondrial electron transport, ubiquinol to cytochrome c|aerobic respiration|respiratory electron transport chain|cellular metabolic process|small molecule metabolic process|oxidation-reduction process|	None	7	1	10.8	10.8	8	1.8	9.7	9.7	1.5	17.9	0.00493	0.7	2.6	0.159874	0	0	0
ENSMUSG00000027163	COMMD9	COMM domain containing 9	None	None	None	10	-0.5	12.3	-12.3	10	-1	6.77	-6.77	-0.6	17.9	0.00493	-1.1	-0.3	0.159874	0	0	0
ENSMUSG00000027429	SEC23B	Sec23 homolog B (S. cerevisiae)	Golgi membrane|endoplasmic reticulum membrane|endomembrane system|membrane|COPII vesicle coat|endoplasmic reticulum-Golgi intermediate compartment membrane|intracellular membrane-bounded organelle|perinuclear region of cytoplasm|	intracellular protein transport|ER to Golgi vesicle-mediated transport|vesicle-mediated transport|	zinc ion binding|	10	-2	17	-17	10	-0.8	5	-5	-0.8	17.9	0.00493	-3	-0.4	0.159874	0	0	0
ENSMUSG00000021038	VIPAS39	VPS33B interacting protein, apical-basolateral polarity regulator, spe-39 homolog	cytoplasm|early endosome|late endosome|cytoplasmic membrane-bounded vesicle|HOPS complex|recycling endosome|	transcription, DNA-templated|regulation of transcription, DNA-templated|intracellular protein transport|spermatogenesis|endosome to lysosome transport|cell differentiation|	protein binding|	10	-1.8	20.4	-20.4	10	-0.4	0.812	-0.812	-1.8	17.9	0.00493	-3	-0.8	0.159874	0	0	0
ENSMUSG00000074121	NTF5	neurotrophin 5	extracellular region|	ganglion mother cell fate determination|long-term memory|sensory organ boundary specification|adult locomotory behavior|epidermis development|mechanoreceptor differentiation|innervation|negative regulation of cell death|taste bud development|	receptor binding|neurotrophin p75 receptor binding|growth factor activity|	10	-1	7	-7	10	-1.6	12.5	-12.5	-1.1	17.8	0.00503	-2.3	-0.7	0.161583	0	0	0
ENSMUSG00000047793	SNED1	sushi, nidogen and EGF-like domains 1	extracellular vesicular exosome|	cell-matrix adhesion|	calcium ion binding|	10	-1.6	6.25	-6.25	10	-2	12.3	-12.3	-1.6	17.8	0.00503	-3.2	-0.9	0.161583	0	0	0
ENSMUSG00000027386	FBLN7	fibulin 7	proteinaceous extracellular matrix|extracellular vesicular exosome|	cell adhesion|	calcium ion binding|heparin binding|	10	-0.7	9.47	-9.47	10	-1.8	12.3	-12.3	-1.1	17.8	0.00503	-2.5	-0.6	0.161583	0	0	0
ENSMUSG00000006095	TBCB	tubulin folding cofactor B	nucleus|cytoplasm|microtubule|microtubule cytoskeleton|	nervous system development|cell differentiation|cellular protein metabolic process|'de novo' posttranslational protein folding|	protein binding|	7	0.8	6.78	6.78	8	1	11.7	11.7	0.9	17.8	0.00503	0.5	1.6	0.161583	0	0	0
ENSMUSG00000090877	HSPA1B	heat shock 70kDa protein 1B	nucleus|cytoplasm|cytoplasm|mitochondrion|endoplasmic reticulum|centriole|cytosol|cytosol|COP9 signalosome|inclusion body|aggresome|nuclear speck|ribonucleoprotein complex|perinuclear region of cytoplasm|extracellular vesicular exosome|blood microparticle|	ATP catabolic process|mRNA catabolic process|response to unfolded protein|negative regulation of cell proliferation|response to virus|gene expression|RNA metabolic process|mRNA metabolic process|negative regulation of cell growth|cellular response to heat|protein refolding|negative regulation of apoptotic process|negative regulation of apoptotic process|positive regulation of erythrocyte differen…	virus receptor activity|double-stranded RNA binding|protein binding|ATP binding|ATPase activity|enzyme binding|heat shock protein binding|ubiquitin protein ligase binding|ATPase activity, coupled|protein binding involved in protein folding|poly(A) RNA binding|protein N-terminus binding|unfolded protein binding|unfolded protein binding|	10	-1.6	7.05	-7.05	10	-1.2	11.4	-11.4	-1.5	17.8	0.00503	-2.4	-0.5	0.161583	0	0	0
ENSMUSG00000060733	IPMK	inositol polyphosphate multikinase	nucleus|nucleoplasm|	neural tube formation|phosphorylation|inositol phosphate biosynthetic process|inositol phosphate metabolic process|small molecule metabolic process|	inositol-1,4,5-trisphosphate 6-kinase activity|inositol tetrakisphosphate 3-kinase activity|ATP binding|inositol-1,4,5-trisphosphate 3-kinase activity|	10	0.7	9.28	9.28	9	0.7	8.95	8.95	0.7	17.8	0.00503	0.4	1.3	0.161583	0	0	0
ENSMUSG00000052595	A1CF	APOBEC1 complementation factor	nucleus|nucleoplasm|cytoplasm|endoplasmic reticulum|apolipoprotein B mRNA editing enzyme complex|	mRNA processing|gene expression|cytidine to uridine editing|mRNA modification|protein stabilization|	nucleotide binding|RNA binding|single-stranded RNA binding|protein binding|	10	-0.7	13.3	-13.3	10	-0.7	4.87	-4.87	-0.7	17.8	0.00503	-1.1	-0.4	0.161583	0	0	0
ENSMUSG00000037966	NINJ1	ninjurin 1	integral component of membrane|	cell adhesion|nervous system development|tissue regeneration|	None	10	-0.7	14.5	-14.5	10	-0.7	3.63	-3.63	-0.7	17.8	0.00503	-1.1	-0.4	0.161583	0	0	0
ENSMUSG00000020132	RAB21	RAB21, member RAS oncogene family	Golgi membrane|endosome|endoplasmic reticulum membrane|cytoplasmic vesicle membrane|early endosome membrane|cleavage furrow|extracellular vesicular exosome|	GTP catabolic process|small GTPase mediated signal transduction|protein transport|	GTPase activity|protein binding|GTP binding|GDP binding|	10	-0.6	16.6	-16.6	10	-0.4	2.09	-2.09	-0.6	17.8	0.00503	-0.9	-0.3	0.161583	0	0	0
ENSMUSG00000026779	MASTL	microtubule associated serine/threonine kinase-like	nucleus|nucleoplasm|cytoplasm|centrosome|cleavage furrow|	G2/M transition of mitotic cell cycle|mitotic cell cycle|protein phosphorylation|cellular response to DNA damage stimulus|mitotic nuclear division|negative regulation of protein phosphatase type 2A activity|regulation of cell cycle|	protein serine/threonine kinase activity|ATP binding|kinase activity|protein phosphatase 2A binding|	6	-0.8	4.15	-4.15	9	1.3	20.5	20.5	1.3	17.7	0.00509	0.7	2.5	0.161236	0	0	0
ENSMUSG00000028992	NMNAT1	nicotinamide nucleotide adenylyltransferase 1	nucleus|nucleoplasm|	vitamin metabolic process|water-soluble vitamin metabolic process|NAD biosynthetic process|NAD biosynthetic process|NAD metabolic process|small molecule metabolic process|	nicotinamide-nucleotide adenylyltransferase activity|nicotinamide-nucleotide adenylyltransferase activity|nicotinate-nucleotide adenylyltransferase activity|protein binding|ATP binding|	10	-1.3	9.07	-9.07	10	-1.4	9.04	-9.04	-1.4	17.7	0.00509	-2.2	-0.7	0.161236	0	0	0
ENSMUSG00000032002	DCUN1D5	DCN1, defective in cullin neddylation 1, domain containing 5	cellular_component|	biological_process|	molecular_function|	10	-1.7	15.1	-15.1	10	-0.8	5.4	-5.4	-1.3	17.7	0.00509	-2.3	-0.6	0.161236	0	0	0
ENSMUSG00000024104	FAM21	family with sequence similarity 21	endosome|early endosome|membrane|WASH complex|	transport|	molecular_function|	10	-1.4	14	-14	10	-0.8	5.05	-5.05	-1	17.7	0.00509	-1.9	-0.6	0.161236	0	0	0
ENSMUSG00000032562	GNAI2	guanine nucleotide binding protein (G protein), alpha inhibiting activity polypeptide 2	nucleus|cytoplasm|centrosome|cytosol|heterotrimeric G-protein complex|plasma membrane|plasma membrane|membrane|midbody|membrane raft|extracellular vesicular exosome|	activation of MAPKK activity|adenosine receptor signaling pathway|GTP catabolic process|cell cycle|signal transduction|G-protein coupled receptor signaling pathway|adenylate cyclase-inhibiting G-protein coupled receptor signaling pathway|adenylate cyclase-inhibiting G-protein coupled receptor signaling pathway|negative regulation of adenylate cyclase activity|G-protein coupled acetylcholine recep…	G-protein coupled receptor binding|GTPase activity|signal transducer activity|protein binding|GTP binding|G-protein beta/gamma-subunit complex binding|metal ion binding|	10	0.8	15.3	15.3	10	0.7	2.94	2.94	0.8	17.7	0.00509	0.4	1.4	0.161236	0	0	0
ENSMUSG00000026289	ATG16L1	autophagy related 16-like 1 (S. cerevisiae)	autophagic vacuole membrane|autophagic vacuole|axoneme|pre-autophagosomal structure membrane|	autophagic vacuole assembly|protein transport|protein homooligomerization|	protein binding|identical protein binding|	10	0.6	16.2	16.2	10	0.4	2.39	2.39	0.5	17.7	0.00509	0.3	0.9	0.161236	0	0	0
ENSMUSG00000029642	POLR1D	polymerase (RNA) I polypeptide D, 16kDa	nucleoplasm|DNA-directed RNA polymerase III complex|DNA-directed RNA polymerase I complex|cytosol|	transcription from RNA polymerase I promoter|transcription initiation from RNA polymerase I promoter|transcription elongation from RNA polymerase I promoter|termination of RNA polymerase I transcription|transcription from RNA polymerase III promoter|transcription elongation from RNA polymerase III promoter|termination of RNA polymerase III transcription|gene expression|positive regulation of type…	RNA polymerase I activity|RNA polymerase III activity|DNA binding|protein dimerization activity|	6	-1.2	18.6	-18.6	6	0.2	0.455	0.455	-1.1	17.7	0.00509	-1.9	-0.7	0.161236	0	0	0
ENSMUSG00000072082	CCNF	cyclin F	nucleus|centriole|SCF ubiquitin ligase complex|	re-entry into mitotic cell cycle|placenta development|mitotic nuclear division|negative regulation of centrosome duplication|protein ubiquitination|SCF-dependent proteasomal ubiquitin-dependent protein catabolic process|	protein binding|	10	0.4	4.83	4.83	10	2	16.9	16.9	1.8	17.6	0.00519	0.3	3.5	0.162644	0	0	0
ENSMUSG00000047861	FOXI1	forkhead box I1	nucleus|	transcription, DNA-templated|embryo development|inner ear morphogenesis|positive regulation of transcription from RNA polymerase II promoter|	sequence-specific DNA binding transcription factor activity|DNA binding, bending|sequence-specific DNA binding|transcription regulatory region DNA binding|	10	-0.9	11.8	-11.8	10	-1	6.29	-6.29	-0.9	17.6	0.00519	-1.6	-0.6	0.162644	0	0	0
ENSMUSG00000032485	SCAP	SREBF chaperone	Golgi membrane|endoplasmic reticulum|endoplasmic reticulum membrane|Golgi apparatus|ER to Golgi transport vesicle membrane|integral component of membrane|protein complex|	response to hypoxia|aging|cholesterol metabolic process|response to insulin|SREBP signaling pathway|regulation of fatty acid biosynthetic process|small molecule metabolic process|negative regulation of cholesterol biosynthetic process|positive regulation of low-density lipoprotein particle receptor biosynthetic process|	protein binding|protein complex binding|unfolded protein binding|	7	-1.3	11.9	-11.9	7	-1.1	6.27	-6.27	-1.2	17.6	0.00519	-1.8	-0.6	0.162644	0	0	0
ENSMUSG00000079487	MED12	mediator complex subunit 12	nucleus|nucleoplasm|membrane|mediator complex|	neural tube closure|transcription initiation from RNA polymerase II promoter|transcription initiation from RNA polymerase II promoter|heart development|gene expression|oligodendrocyte development|Schwann cell development|stem cell maintenance|negative regulation of Wnt signaling pathway|intracellular steroid hormone receptor signaling pathway|androgen receptor signaling pathway|positive regulatio…	RNA polymerase II distal enhancer sequence-specific DNA binding|RNA polymerase II transcription cofactor activity|RNA polymerase II transcription factor binding transcription factor activity involved in positive regulation of transcription|chromatin binding|transcription cofactor activity|transcription coactivator activity|receptor activity|protein binding|beta-catenin binding|protein C-terminus …	10	1.1	15.5	15.5	9	0.5	3.08	3.08	0.7	17.6	0.00519	0.4	1.5	0.162644	0	0	0
ENSMUSG00000035325	SEC31A	SEC31 homolog A (S. cerevisiae)	Golgi membrane|cytoplasm|endoplasmic reticulum|endoplasmic reticulum membrane|cytosol|ER to Golgi transport vesicle membrane|vesicle coat|COPII vesicle coat|ER to Golgi transport vesicle|intracellular membrane-bounded organelle|perinuclear region of cytoplasm|	antigen processing and presentation of peptide antigen via MHC class I|ER to Golgi vesicle-mediated transport|ER to Golgi vesicle-mediated transport|activation of signaling protein activity involved in unfolded protein response|protein transport|protein N-linked glycosylation via asparagine|antigen processing and presentation of exogenous peptide antigen via MHC class II|endoplasmic reticulum unf…	protein binding|calcium-dependent protein binding|	10	-0.7	15.5	-15.5	10	-0.8	2.52	-2.52	-0.7	17.6	0.00519	-1.2	-0.4	0.162644	0	0	0
ENSMUSG00000024245	TMEM178	transmembrane protein 178	cellular_component|membrane|integral component of membrane|	biological_process|	molecular_function|	10	-1	6.6	-6.6	10	-2.2	11.8	-11.8	-1.1	17.5	0.00528	-2.8	-0.6	0.164209	0	0	0
ENSMUSG00000083012	FAM220A	family with sequence similarity 220, member A	nucleus|	None	None	9	-0.8	9.1	-9.1	9	-1.4	10.9	-10.9	-1	17.5	0.00528	-2	-0.6	0.164209	0	0	0
ENSMUSG00000005667	MTHFD2	methylenetetrahydrofolate dehydrogenase (NADP+ dependent) 2, methenyltetrahydrofolate cyclohydrolase	extracellular space|mitochondrion|mitochondrion|	one-carbon metabolic process|folic acid-containing compound biosynthetic process|tetrahydrofolate metabolic process|oxidation-reduction process|	magnesium ion binding|methenyltetrahydrofolate cyclohydrolase activity|methenyltetrahydrofolate cyclohydrolase activity|methylenetetrahydrofolate dehydrogenase (NAD+) activity|methylenetetrahydrofolate dehydrogenase (NADP+) activity|phosphate ion binding|	9	0.7	13.1	13.1	8	1.6	7.91	7.91	0.8	17.5	0.00528	0.4	1.9	0.164209	0	0	0
ENSMUSG00000032185	CARM1	coactivator-associated arginine methyltransferase 1	nucleus|nucleoplasm|cytoplasm|cytosol|cytosol|	regulation of growth plate cartilage chondrocyte proliferation|transcription, DNA-templated|regulation of transcription, DNA-templated|regulation of transcription, DNA-templated|positive regulation of cell proliferation|pathogenesis|viral process|histone methylation|histone methylation|peptidyl-arginine methylation, to asymmetrical-dimethyl arginine|intracellular estrogen receptor signaling pathw…	transcription coactivator activity|protein binding|beta-catenin binding|protein methyltransferase activity|histone-arginine N-methyltransferase activity|protein-arginine N-methyltransferase activity|ligand-dependent nuclear receptor transcription coactivator activity|protein-arginine omega-N asymmetric methyltransferase activity|protein-arginine omega-N asymmetric methyltransferase activity|histo…	10	0.5	11.9	11.9	10	0.5	6	6	0.5	17.5	0.00528	0.3	0.9	0.164209	0	0	0
ENSMUSG00000052565	HIST1H1D	histone cluster 1, H1d	nucleosome|nuclear chromatin|nuclear euchromatin|	nucleosome assembly|nucleosome positioning|	chromatin DNA binding|poly(A) RNA binding|	10	-0.9	13.9	-13.9	10	-0.8	4.06	-4.06	-0.9	17.5	0.00528	-1.7	-0.5	0.164209	0	0	0
ENSMUSG00000017631	ABR	active BCR-related	cytosol|plasma membrane|membrane|	small GTPase mediated signal transduction|brain development|actin cytoskeleton organization|negative regulation of cell migration|response to lipopolysaccharide|positive regulation of Rac GTPase activity|inner ear morphogenesis|positive regulation of apoptotic process|negative regulation of neutrophil degranulation|neurotrophin TRK receptor signaling pathway|negative regulation of inflammatory re…	Rho guanyl-nucleotide exchange factor activity|GTPase activator activity|Rac GTPase activator activity|	10	0.6	14.5	14.5	10	0.4	3.79	3.79	0.5	17.5	0.00528	0.3	0.9	0.164209	0	0	0
ENSMUSG00000037369	KDM6A	lysine (K)-specific demethylase 6A	nucleus|histone methyltransferase complex|	in utero embryonic development|neural tube closure|respiratory system process|heart development|somite rostral/caudal axis specification|mesodermal cell differentiation|notochord morphogenesis|histone H3-K4 methylation|oxidation-reduction process|canonical Wnt signaling pathway|histone H3-K27 demethylation|	RNA polymerase II core promoter proximal region sequence-specific DNA binding|metal ion binding|dioxygenase activity|histone demethylase activity (H3-K27 specific)|	9	-0.9	16.4	-16.4	8	-0.4	1.78	-1.78	-0.9	17.5	0.00528	-1.5	-0.4	0.164209	0	0	0
ENSMUSG00000027108	OLA1	Obg-like ATPase 1	nucleolus|cytoplasm|membrane|extracellular vesicular exosome|	ATP catabolic process|	protein binding|ATP binding|GTP binding|ATPase activity|ribosome binding|ribosomal large subunit binding|metal ion binding|	10	-1.4	17.4	-17.4	10	-0.5	1.24	-1.24	-1.4	17.5	0.00528	-2.4	-0.8	0.164209	0	0	0
ENSMUSG00000027455	NSFL1C	NSFL1 (p97) cofactor (p47)	nucleus|chromosome|cytoplasm|Golgi stack|plasma membrane|intermediate filament cytoskeleton|	None	protein binding|lipid binding|	10	0.6	7.28	7.28	10	1.1	12.6	12.6	0.9	17.4	0.00537	0.5	1.6	0.165005	0	0	0
ENSMUSG00000074476	SPC24	SPC24, NDC80 kinetochore complex component	condensed chromosome kinetochore|nucleus|nucleolus|cytosol|Ndc80 complex|	mitotic cell cycle|mitotic nuclear division|	protein binding|	8	1.3	6.83	6.83	8	1.7	11.7	11.7	1.5	17.4	0.00537	-1	3	0.165005	0	0	0
ENSMUSG00000026792	LRSAM1	leucine rich repeat and sterile alpha motif containing 1	extracellular region|cytoplasm|membrane|	protein polyubiquitination|cell death|protein catabolic process|negative regulation of endocytosis|viral budding|protein autoubiquitination|ubiquitin-dependent endocytosis|	ubiquitin-protein transferase activity|hormone activity|protein binding|zinc ion binding|ligase activity|	10	-1.6	7.92	-7.92	10	-1	10.9	-10.9	-1.6	17.4	0.00537	-2.3	-0.7	0.165005	0	0	0
ENSMUSG00000061244	EXOC5	exocyst complex component 5	cytoplasm|cytosol|	exocytosis|post-Golgi vesicle-mediated transport|protein transport|cellular protein metabolic process|vesicle docking|membrane organization|	protein N-terminus binding|	9	-1.3	8.55	-8.55	9	-1.8	9.99	-9.99	-1.4	17.4	0.00537	-2.7	-0.7	0.165005	0	0	0
ENSMUSG00000032217	RNF111	ring finger protein 111	nucleus|nucleoplasm|nucleolus|cytoplasm|protein complex|	protein polyubiquitination|transcription, DNA-templated|transcription initiation from RNA polymerase II promoter|transforming growth factor beta receptor signaling pathway|pattern specification process|gene expression|positive regulation of transforming growth factor beta receptor signaling pathway|ubiquitin-dependent SMAD protein catabolic process|positive regulation of protein ubiquitination|po…	ubiquitin-protein transferase activity|protein binding|zinc ion binding|ligase activity|SUMO polymer binding|SMAD binding|	9	-1.1	10.6	-10.6	9	-2.3	9.89	-9.89	-1.2	17.4	0.00537	-3.1	-0.7	0.165005	0	0	0
ENSMUSG00000006678	POLA1	polymerase (DNA directed), alpha 1, catalytic subunit	chromatin|nucleus|nuclear envelope|nucleoplasm|nucleoplasm|alpha DNA polymerase:primase complex|alpha DNA polymerase:primase complex|nucleolus|cytoplasm|nuclear matrix|	G1/S transition of mitotic cell cycle|regulation of transcription involved in G1/S transition of mitotic cell cycle|mitotic S phase|mitotic cell cycle|telomere maintenance via recombination|telomere maintenance|DNA replication|DNA replication, synthesis of RNA primer|DNA replication initiation|DNA replication initiation|DNA strand elongation involved in DNA replication|DNA strand elongation invol…	nucleotide binding|nucleoside binding|DNA binding|DNA binding|chromatin binding|DNA-directed DNA polymerase activity|DNA-directed DNA polymerase activity|DNA primase activity|protein binding|3'-5' exonuclease activity|metal ion binding|protein heterodimerization activity|4 iron, 4 sulfur cluster binding|	9	-1.3	12.6	-12.6	10	1.2	5.84	5.84	-1.3	17.4	0.00537	-2.1	-0.7	0.165005	0	0	0
ENSMUSG00000018362	KPNA2	karyopherin alpha 2 (RAG cohort 1, importin alpha 1)	nucleus|nucleoplasm|cytoplasm|cytosol|membrane|	regulation of DNA recombination|mitotic G2 phase|DNA metabolic process|NLS-bearing protein import into nucleus|viral process|cytokine-mediated signaling pathway|	protein binding|nuclear localization sequence binding|protein transporter activity|histone deacetylase binding|poly(A) RNA binding|	7	1.4	16.6	16.6	7	0.8	2.17	2.17	1.3	17.4	0.00537	0.8	2.5	0.165005	0	0	0
ENSMUSG00000046854	PIP5KL1	phosphatidylinositol-4-phosphate 5-kinase-like 1	cytoplasm|membrane|cell projection|	phosphatidylinositol phosphorylation|	ATP binding|1-phosphatidylinositol-4-phosphate 5-kinase activity|	10	-1.5	15.7	-15.7	10	-0.5	2.13	-2.13	-1.5	17.4	0.00537	-2.6	-1	0.165005	0	0	0
ENSMUSG00000079677	FDX1L	ferredoxin 1-like	mitochondrial matrix|	small molecule metabolic process|oxidation-reduction process|	electron carrier activity|metal ion binding|2 iron, 2 sulfur cluster binding|	10	0.6	6.96	6.96	9	1.1	13.3	13.3	0.8	17.3	0.00543	0.4	1.6	0.164871	0	0	0
ENSMUSG00000071478	HIST1H2AD	histone cluster 1, H2ad	nucleosome|nucleus|extracellular vesicular exosome|	nucleosome assembly|biological_process|	molecular_function|DNA binding|protein heterodimerization activity|	5	1.3	7.12	7.12	5	1.5	10.6	10.6	1.4	17.3	0.00543	1	2.8	0.164871	0	0	0
ENSMUSG00000091131	GM7945	predicted gene 7945	cellular_component|	biological_process|	molecular_function|	9	-1.3	16.5	-16.5	9	-0.8	2.62	-2.62	-1.2	17.3	0.00543	-1.8	-0.7	0.164871	0	0	0
ENSMUSG00000075419	DOLK	dolichol kinase	endoplasmic reticulum membrane|integral component of endoplasmic reticulum membrane|	dolichol-linked oligosaccharide biosynthetic process|dolichyl diphosphate biosynthetic process|phosphorylation|protein N-linked glycosylation via asparagine|dolichyl monophosphate biosynthetic process|post-translational protein modification|cellular protein metabolic process|	dolichol kinase activity|	7	-1.7	18.8	-18.8	8	0	0	0	-1.6	17.3	0.00543	-2.8	-1	0.164871	0	0	0
ENSMUSG00000094143	B930078G14RIK	RIKEN cDNA B930078G14 gene	None	None	None	8	-0.7	7.82	-7.82	8	-1.1	11.1	-11.1	-0.8	17.2	0.00555	-1.5	-0.4	0.167522	0	0	0
ENSMUSG00000089704	GALNT2	polypeptide N-acetylgalactosaminyltransferase 2	Golgi membrane|Golgi apparatus|Golgi apparatus|Golgi stack|membrane|integral component of Golgi membrane|Golgi cisterna membrane|perinuclear region of cytoplasm|extracellular vesicular exosome|	immunoglobulin biosynthetic process|protein O-linked glycosylation|O-glycan processing|protein O-linked glycosylation via serine|protein O-linked glycosylation via threonine|post-translational protein modification|cellular protein metabolic process|	polypeptide N-acetylgalactosaminyltransferase activity|manganese ion binding|	10	-0.6	8.91	-8.91	10	-1.2	10.1	-10.1	-0.8	17.2	0.00555	-1.6	-0.4	0.167522	0	0	0
ENSMUSG00000055024	EP300	E1A binding protein p300	histone acetyltransferase complex|chromatin|nucleus|nucleoplasm|transcription factor complex|cytoplasm|protein-DNA complex|	G2/M transition of mitotic cell cycle|negative regulation of transcription from RNA polymerase II promoter|mitotic cell cycle|response to hypoxia|somitogenesis|liver development|positive regulation of protein phosphorylation|chromatin organization|transcription, DNA-templated|regulation of transcription, DNA-templated|internal protein amino acid acetylation|apoptotic process|Notch signaling pathw…	RNA polymerase II core promoter proximal region sequence-specific DNA binding|core promoter binding|RNA polymerase II activating transcription factor binding|p53 binding|DNA binding|chromatin binding|transcription coactivator activity|transcription coactivator activity|antigen binding|histone acetyltransferase activity|lysine N-acetyltransferase activity|protein binding|beta-catenin binding|trans…	10	-0.6	8.73	-8.73	10	-0.6	8.86	-8.86	-0.6	17.2	0.00555	-1.1	-0.3	0.167522	0	0	0
ENSMUSG00000066357	WDR6	WD repeat domain 6	cytoplasm|plasma membrane|COP9 signalosome|	cell cycle arrest|negative regulation of cell proliferation|negative regulation of autophagy|	protein binding|insulin receptor substrate binding|poly(A) RNA binding|	10	1.1	11	11	10	0.8	7.2	7.2	1.1	17.2	0.00555	0.7	1.7	0.167522	0	0	0
ENSMUSG00000002870	MCM2	minichromosome maintenance complex component 2	chromatin|nucleus|nucleoplasm|nuclear origin of replication recognition complex|cytoplasm|microtubule cytoskeleton|MCM complex|	G1/S transition of mitotic cell cycle|mitotic cell cycle|DNA replication|DNA unwinding involved in DNA replication|DNA replication initiation|DNA strand elongation involved in DNA replication|nucleosome assembly|cell cycle|cellular response to interleukin-4|	DNA binding|DNA helicase activity|DNA replication origin binding|protein binding|ATP binding|histone binding|metal ion binding|	10	0.6	11.1	11.1	10	0.7	6.66	6.66	0.6	17.2	0.00555	0.4	1.1	0.167522	0	0	0
ENSMUSG00000025175	FN3K	fructosamine 3 kinase	cellular_component|	phosphorylation|fructoselysine metabolic process|epithelial cell differentiation|	fructosamine-3-kinase activity|	10	-1.1	6.62	-6.62	10	-1.9	13	-13	-1.8	17.1	0.00564	-2.8	-1	0.168994	0	0	0
ENSMUSG00000069310	HIST1H3C	histone cluster 1, H3c	None	None	None	8	-1.2	8.43	-8.43	8	-1.3	9.08	-9.08	-1.2	17.1	0.00564	-1.9	-0.8	0.168994	0	0	0
ENSMUSG00000033933	VHL	von Hippel-Lindau tumor suppressor, E3 ubiquitin protein ligase	nucleus|nucleoplasm|mitochondrion|endoplasmic reticulum|cytosol|membrane|intermediate filament cytoskeleton|	negative regulation of transcription from RNA polymerase II promoter|cell morphogenesis|regulation of transcription, DNA-templated|proteolysis|response to stress|negative regulation of cell proliferation|protein ubiquitination|protein ubiquitination|negative regulation of apoptotic process|positive regulation of cell differentiation|positive regulation of transcription, DNA-templated|protein stab…	ubiquitin-protein transferase activity|protein binding|transcription factor binding|enzyme binding|	8	-1.3	9.81	-9.81	8	-1	8.5	-8.5	-1.1	17.1	0.00564	-1.8	-0.7	0.168994	0	0	0
ENSMUSG00000024856	CDK2AP2	cyclin-dependent kinase 2 associated protein 2	None	None	None	10	-0.8	10.2	-10.2	10	-0.8	7.28	-7.28	-0.8	17.1	0.00564	-1.3	-0.5	0.168994	0	0	0
ENSMUSG00000050244	HEATR1	HEAT repeat containing 1	nucleus|nucleolus|mitochondrion|membrane|ribonucleoprotein complex|	rRNA processing|	protein binding|poly(A) RNA binding|	7	1.2	10.6	10.6	6	1.4	6.92	6.92	1.3	17.1	0.00564	0.7	2.5	0.168994	0	0	0
ENSMUSG00000091722	SIAH3	siah E3 ubiquitin protein ligase family member 3	nucleus|mitochondrion|	ubiquitin-dependent protein catabolic process|multicellular organismal development|	metal ion binding|	9	-2	19.6	-19.6	10	0.5	0.698	0.698	-2	17.1	0.00564	-3.7	-0.8	0.168994	0	0	0
ENSMUSG00000027820	MME	membrane metallo-endopeptidase	cytoplasm|plasma membrane|plasma membrane|integral component of plasma membrane|brush border|synaptic vesicle|integral component of membrane|axon|dendrite|neuron projection terminus|synapse|extracellular vesicular exosome|	kidney development|angiotensin maturation|proteolysis|peptide metabolic process|sensory perception of pain|cellular protein metabolic process|creatinine metabolic process|beta-amyloid metabolic process|cellular response to cytokine stimulus|cellular response to UV-A|cellular response to UV-B|replicative senescence|	endopeptidase activity|endopeptidase activity|metalloendopeptidase activity|protein binding|zinc ion binding|peptide binding|	10	0.4	1.45	1.45	10	2	19.8	19.8	1.9	17	0.00576	0.6	4	0.171089	0	0	0
ENSMUSG00000094205	GM8926	predicted gene 8926	None	None	None	9	1.4	3.32	3.32	9	1	15.1	15.1	1.3	17	0.00576	0.7	2.3	0.171089	0	0	0
ENSMUSG00000020184	MDM2	MDM2 proto-oncogene, E3 ubiquitin protein ligase	nucleus|nucleus|nucleoplasm|nucleoplasm|nucleolus|cytoplasm|cytosol|plasma membrane|nuclear body|endocytic vesicle membrane|protein complex|synapse|	negative regulation of transcription from RNA polymerase II promoter|protein complex assembly|DNA damage response, signal transduction by p53 class mediator resulting in cell cycle arrest|DNA damage response, signal transduction by p53 class mediator resulting in cell cycle arrest|traversing start control point of mitotic cell cycle|epidermal growth factor receptor signaling pathway|synaptic tran…	p53 binding|ubiquitin-protein transferase activity|ubiquitin-protein transferase activity|protein binding|zinc ion binding|ligase activity|enzyme binding|ubiquitin protein ligase binding|identical protein binding|peroxisome proliferator activated receptor binding|scaffold protein binding|	8	0.6	12.1	12.1	9	1.7	8.22	8.22	0.6	17	0.00576	0.4	2	0.171089	0	0	0
ENSMUSG00000042772	SMG7	SMG7 nonsense mediated mRNA decay factor	nucleus|cytoplasm|cytosol|intermediate filament cytoskeleton|	nuclear-transcribed mRNA catabolic process, nonsense-mediated decay|mRNA export from nucleus|gene expression|RNA metabolic process|mRNA metabolic process|regulation of dephosphorylation|	protein binding|protein phosphatase 2A binding|	9	-0.8	10.5	-10.5	9	-1.1	7.28	-7.28	-0.8	17	0.00576	-1.7	-0.5	0.171089	0	0	0
ENSMUSG00000046610	OACYL	O-acyltransferase like	cellular_component|	biological_process|	molecular_function|	10	1.2	10.9	10.9	10	1.4	6.81	6.81	1.2	17	0.00576	0.8	2.4	0.171089	0	0	0
ENSMUSG00000024949	SF1	splicing factor 1	nucleus|nucleus|spliceosomal complex|ribosome|	spliceosomal complex assembly|mRNA 3'-splice site recognition|mRNA splicing, via spliceosome|transcription, DNA-templated|regulation of transcription, DNA-templated|male sex determination|Leydig cell differentiation|negative regulation of smooth muscle cell proliferation|regulation of steroid biosynthetic process|	transcription corepressor activity|RNA binding|zinc ion binding|poly(A) RNA binding|	8	-0.7	11.5	-11.5	8	-0.8	6.02	-6.02	-0.7	17	0.00576	-1.6	-0.4	0.171089	0	0	0
ENSMUSG00000039067	PSMD7	proteasome (prosome, macropain) 26S subunit, non-ATPase, 7	proteasome complex|nucleus|nucleoplasm|cytosol|proteasome regulatory particle|membrane|extracellular vesicular exosome|	G1/S transition of mitotic cell cycle|protein polyubiquitination|mitotic cell cycle|antigen processing and presentation of peptide antigen via MHC class I|antigen processing and presentation of exogenous peptide antigen via MHC class I, TAP-dependent|regulation of cellular amino acid metabolic process|apoptotic process|DNA damage response, signal transduction by p53 class mediator resulting in ce…	protein binding|	10	0.7	11.7	11.7	10	0.8	5.75	5.75	0.8	17	0.00576	0.5	1.4	0.171089	0	0	0
ENSMUSG00000021546	HNRNPK	heterogeneous nuclear ribonucleoprotein K	nuclear chromatin|podosome|nucleus|nucleoplasm|cytoplasm|membrane|cell junction|cell projection|extracellular vesicular exosome|catalytic step 2 spliceosome|	mRNA splicing, via spliceosome|mRNA splicing, via spliceosome|transcription, DNA-templated|RNA processing|signal transduction|RNA splicing|gene expression|regulation of low-density lipoprotein particle clearance|viral process|positive regulation of low-density lipoprotein particle receptor biosynthetic process|positive regulation of transcription from RNA polymerase II promoter|positive regulatio…	RNA polymerase II core promoter proximal region sequence-specific DNA binding|RNA polymerase II core promoter proximal region sequence-specific DNA binding transcription factor activity involved in positive regulation of transcription|single-stranded DNA binding|RNA binding|protein binding|poly(A) RNA binding|	6	1.5	13.1	13.1	5	1.1	4.69	4.69	1.4	17	0.00576	0.8	2.6	0.171089	0	0	0
ENSMUSG00000027134	LPCAT4	lysophosphatidylcholine acyltransferase 4	endoplasmic reticulum|endoplasmic reticulum membrane|membrane|integral component of membrane|	phospholipid metabolic process|phospholipid metabolic process|phospholipid metabolic process|phosphatidic acid biosynthetic process|triglyceride biosynthetic process|phosphatidylglycerol acyl-chain remodeling|phosphatidylserine acyl-chain remodeling|phosphatidylcholine acyl-chain remodeling|phosphatidylethanolamine acyl-chain remodeling|cellular lipid metabolic process|small molecule metabolic pr…	calcium ion binding|1-alkenylglycerophosphoethanolamine O-acyltransferase activity|1-acylglycerophosphocholine O-acyltransferase activity|1-alkylglycerophosphocholine O-acetyltransferase activity|lysophospholipid acyltransferase activity|lysophospholipid acyltransferase activity|	10	-1.4	15.4	-15.4	10	-0.6	4.15	-4.15	-0.9	17	0.00576	-2	-0.5	0.171089	0	0	0
ENSMUSG00000014603	ALX3	ALX homeobox 3	nucleus|	transcription, DNA-templated|regulation of transcription, DNA-templated|pattern specification process|embryonic forelimb morphogenesis|embryonic hindlimb morphogenesis|regulation of apoptotic process|embryonic skeletal system morphogenesis|	sequence-specific DNA binding transcription factor activity|sequence-specific DNA binding|	10	-1.4	4.47	-4.47	10	-2.1	13.4	-13.4	-1.4	16.9	0.00585	-3.2	-0.8	0.171525	0	0	0
ENSMUSG00000095264	GM2854	predicted gene 2854	None	None	None	2	0.7	7.06	7.06	3	1.2	11.2	11.2	1.1	16.9	0.00585	0.7	2	0.171525	0	0	0
ENSMUSG00000041147	BRCA2	breast cancer 2, early onset	nucleus|nucleoplasm|cytoplasm|centrosome|secretory granule|BRCA2-MAGE-D1 complex|protein complex|	double-strand break repair via homologous recombination|double-strand break repair via homologous recombination|cytokinesis|oocyte maturation|inner cell mass cell proliferation|DNA repair|nucleotide-excision repair|double-strand break repair|double-strand break repair|DNA damage response, signal transduction by p53 class mediator resulting in transcription of p21 class mediator|male meiosis I|spe…	protease binding|single-stranded DNA binding|protein binding|H3 histone acetyltransferase activity|H4 histone acetyltransferase activity|gamma-tubulin binding|	10	1.7	8.04	8.04	10	1.6	9.29	9.29	1.6	16.9	0.00585	1	2.8	0.171525	0	0	0
ENSMUSG00000041716	GM20604	predicted gene 20604	None	None	None	10	0.7	11.9	11.9	10	0.5	5.7	5.7	0.7	16.9	0.00585	0.4	1.1	0.171525	0	0	0
ENSMUSG00000031161	HDAC6	histone deacetylase 6	histone deacetylase complex|nucleus|cytoplasm|cytosol|microtubule|microtubule associated complex|cytoplasmic microtubule|caveola|inclusion body|aggresome|dynein complex|axon|dendrite|cell leading edge|perikaryon|perinuclear region of cytoplasm|	protein polyubiquitination|transcription, DNA-templated|protein deacetylation|misfolded or incompletely synthesized protein catabolic process|intracellular protein transport|negative regulation of microtubule depolymerization|response to toxic substance|positive regulation of signal transduction|response to organic substance|regulation of receptor activity|positive regulation of epithelial cell m…	actin binding|histone deacetylase activity|protein binding|beta-catenin binding|microtubule binding|microtubule binding|zinc ion binding|enzyme binding|polyubiquitin binding|NAD-dependent histone deacetylase activity (H3-K14 specific)|histone deacetylase binding|tubulin deacetylase activity|tubulin deacetylase activity|alpha-tubulin binding|NAD-dependent histone deacetylase activity (H3-K9 specif…	10	-0.8	13.9	-13.9	10	-1.1	3.77	-3.77	-0.8	16.9	0.00585	-1.4	-0.4	0.171525	0	0	0
ENSMUSG00000033739	FKBPL	FK506 binding protein like	endoplasmic reticulum membrane|	protein peptidyl-prolyl isomerization|response to radiation|chaperone-mediated protein folding|	peptidyl-prolyl cis-trans isomerase activity|FK506 binding|	10	0.8	5.32	5.32	10	1.3	13	13	1	16.8	0.00593	0.4	2	0.172635	0	0	0
ENSMUSG00000031701	DNAJA2	DnaJ (Hsp40) homolog, subfamily A, member 2	cytosol|membrane|extracellular vesicular exosome|	positive regulation of cell proliferation|response to heat|protein refolding|	protein binding|ATP binding|heat shock protein binding|metal ion binding|unfolded protein binding|chaperone binding|	10	1.4	6.51	6.51	10	1.9	11.6	11.6	1.6	16.8	0.00593	1	3.6	0.172635	0	0	0
ENSMUSG00000033732	SF3B3	splicing factor 3b, subunit 3, 130kDa	nucleoplasm|spliceosomal complex|U12-type spliceosomal complex|small nuclear ribonucleoprotein complex|catalytic step 2 spliceosome|	RNA splicing, via transesterification reactions|mRNA splicing, via spliceosome|mRNA splicing, via spliceosome|mRNA processing|protein complex assembly|RNA splicing|gene expression|	nucleic acid binding|	6	1	6.75	6.75	6	0.9	10.5	10.5	0.9	16.8	0.00593	0.5	1.6	0.172635	0	0	0
ENSMUSG00000036887	C1QA	complement component 1, q subcomponent, A chain	extracellular region|collagen trimer|complement component C1 complex|extracellular vesicular exosome|	complement activation|complement activation, classical pathway|cell-cell signaling|innate immune response|	protein binding|	10	-1.4	10.8	-10.8	10	-1.8	6.67	-6.67	-1.4	16.8	0.00593	-2.6	-0.7	0.172635	0	0	0
ENSMUSG00000043962	THRAP3	thyroid hormone receptor associated protein 3	nucleus|mediator complex|exon-exon junction complex|	regulation of alternative mRNA splicing, via spliceosome|nuclear-transcribed mRNA catabolic process|transcription initiation from RNA polymerase II promoter|mRNA processing|RNA splicing|intracellular steroid hormone receptor signaling pathway|androgen receptor signaling pathway|positive regulation of transcription, DNA-templated|positive regulation of transcription from RNA polymerase II promoter…	RNA polymerase II transcription cofactor activity|transcription cofactor activity|transcription coactivator activity|receptor activity|protein binding|ATP binding|ligand-dependent nuclear receptor transcription coactivator activity|vitamin D receptor binding|poly(A) RNA binding|thyroid hormone receptor binding|phosphoprotein binding|	10	1.6	10.9	10.9	10	1.4	6.66	6.66	1.6	16.8	0.00593	0.9	2.7	0.172635	0	0	0
ENSMUSG00000029622	ARPC1B	actin related protein 2/3 complex, subunit 1B, 41kDa	cytoplasm|Arp2/3 protein complex|actin cytoskeleton|extracellular vesicular exosome|	cellular component movement|regulation of actin filament polymerization|	actin binding|structural constituent of cytoskeleton|	10	-0.9	14.9	-14.9	10	-0.8	2.2	-2.2	-0.9	16.8	0.00593	-1.4	-0.4	0.172635	0	0	0
ENSMUSG00000078735	IL11RA2	interleukin 11 receptor, alpha chain 2	None	None	None	10	0.6	9.31	9.31	10	1.5	11.5	11.5	0.9	16.7	0.006	0.4	2	0.173197	0	0	0
ENSMUSG00000073876	GM13305	predicted gene 13305	cellular_component|	None	molecular_function|	10	0.6	9.31	9.31	10	1.5	11.5	11.5	0.9	16.7	0.006	0.4	2	0.173197	0	0	0
ENSMUSG00000019952	POC1B	POC1 centriolar protein B	spindle pole|centrosome|centriole|ciliary basal body|	cell proliferation|cilium assembly|	protein binding|	10	1.1	9.92	9.92	10	0.9	7.39	7.39	1	16.7	0.006	0.7	1.7	0.173197	0	0	0
ENSMUSG00000004952	RASA4	RAS p21 protein activator 4	cytoplasm|cytosol|intrinsic component of the cytoplasmic side of the plasma membrane|	positive regulation of Ras GTPase activity|intracellular signal transduction|negative regulation of Ras protein signal transduction|	GTPase activator activity|Ras GTPase activator activity|metal ion binding|	8	0.6	10.5	10.5	8	0.9	7.24	7.24	0.7	16.7	0.006	0.4	1.3	0.173197	0	0	0
ENSMUSG00000027180	FBXO3	F-box protein 3	nucleus|cytoplasm|	proteolysis|protein ubiquitination|	ubiquitin-protein transferase activity|protein binding|	10	-0.6	12.1	-12.1	10	-1.3	6.02	-6.02	-0.6	16.7	0.006	-1.3	-0.3	0.173197	0	0	0
ENSMUSG00000059811	ATL2	atlastin GTPase 2	endoplasmic reticulum|endoplasmic reticulum membrane|membrane|integral component of membrane|	GTP catabolic process|GTP catabolic process|endoplasmic reticulum organization|Golgi organization|protein homooligomerization|	GTPase activity|protein binding|GTP binding|identical protein binding|	10	-0.6	14.8	-14.8	10	-0.5	2.39	-2.39	-0.6	16.7	0.006	-1	-0.3	0.173197	0	0	0
ENSMUSG00000095015	GM16434	predicted gene 16434	cellular_component|	biological_process|	molecular_function|	10	0.7	15.8	15.8	9	0.4	1.92	1.92	0.6	16.7	0.006	0.4	1.1	0.173197	0	0	0
ENSMUSG00000096869	GM6676	predicted gene 6676	cellular_component|	biological_process|	molecular_function|	10	0.7	15.8	15.8	9	0.4	1.92	1.92	0.6	16.7	0.006	0.4	1.1	0.173197	0	0	0
ENSMUSG00000094929	GM3526	predicted gene 3526	None	None	None	9	0	0	0	9	1.2	19.8	19.8	1.1	16.6	0.00613	0.7	1.9	0.174978	0	0	0
ENSMUSG00000022283	PABPC1	poly(A) binding protein, cytoplasmic 1	nucleus|cytoplasm|cytosol|cytoplasmic stress granule|membrane|ribonucleoprotein complex|cytoplasmic ribonucleoprotein granule|catalytic step 2 spliceosome|	nuclear-transcribed mRNA catabolic process, nonsense-mediated decay|nuclear-transcribed mRNA catabolic process, deadenylation-dependent decay|nuclear-transcribed mRNA poly(A) tail shortening|mRNA splicing, via spliceosome|mRNA polyadenylation|translation|translational initiation|gene expression|RNA metabolic process|mRNA metabolic process|gene silencing by RNA|cellular protein metabolic process|p…	nucleotide binding|protein binding|protein C-terminus binding|poly(A) binding|poly(A) binding|poly(U) RNA binding|translation activator activity|poly(A) RNA binding|	3	0.6	5.44	5.44	3	1.7	14	14	1.6	16.6	0.00613	0.7	2.9	0.174978	0	0	0
ENSMUSG00000078683	MUP1	major urinary protein 1	extracellular space|	None	pheromone activity|pheromone binding|	10	1.1	5.28	5.28	10	0.8	12.4	12.4	0.9	16.6	0.00613	0.5	1.6	0.174978	0	0	0
ENSMUSG00000031392	IRAK1	interleukin-1 receptor-associated kinase 1	nucleus|cytoplasm|lipid particle|cytosol|plasma membrane|endosome membrane|interleukin-1 receptor complex|	activation of MAPK activity|regulation of cytokine-mediated signaling pathway|toll-like receptor signaling pathway|MyD88-dependent toll-like receptor signaling pathway|MyD88-independent toll-like receptor signaling pathway|protein phosphorylation|signal transduction|transmembrane receptor protein serine/threonine kinase signaling pathway|activation of NF-kappaB-inducing kinase activity|JNK cascad…	protein kinase activity|protein kinase activity|protein serine/threonine kinase activity|protein serine/threonine kinase activity|NF-kappaB-inducing kinase activity|ubiquitin-protein transferase activity|interleukin-1 receptor binding|protein binding|ATP binding|kinase activity|protein homodimerization activity|protein homodimerization activity|protein heterodimerization activity|	9	-1.3	5.09	-5.09	9	-1.5	12.1	-12.1	-1.3	16.6	0.00613	-2.3	-0.6	0.174978	0	0	0
ENSMUSG00000083929	GM10600	predicted gene 10600	None	None	None	10	-0.6	5.09	-5.09	10	-0.8	11.9	-11.9	-0.8	16.6	0.00613	-1.4	-0.4	0.174978	0	0	0
ENSMUSG00000029781	FKBP9	FK506 binding protein 9, 63 kDa	endoplasmic reticulum|endoplasmic reticulum membrane|	protein peptidyl-prolyl isomerization|protein folding|chaperone-mediated protein folding|	peptidyl-prolyl cis-trans isomerase activity|calcium ion binding|FK506 binding|	10	0.6	5.6	5.6	10	0.8	11.8	11.8	0.7	16.6	0.00613	0.4	1.3	0.174978	0	0	0
ENSMUSG00000067700	GM5862	predicted gene 5862	cellular_component|	biological_process|	molecular_function|	10	1	6.09	6.09	10	0.8	11.1	11.1	0.8	16.6	0.00613	0.4	1.3	0.174978	0	0	0
ENSMUSG00000032671	A930018P22RIK	RIKEN cDNA A930018P22 gene	cellular_component|	biological_process|	molecular_function|	10	-0.7	7.05	-7.05	10	-1	10.2	-10.2	-1	16.6	0.00613	-2.1	-0.4	0.174978	0	0	0
ENSMUSG00000038910	PLCL2	phospholipase C-like 2	cytoplasm|	lipid metabolic process|intracellular signal transduction|	phosphatidylinositol phospholipase C activity|signal transducer activity|calcium ion binding|GABA receptor binding|	10	0.5	10.8	10.8	10	1	6.76	6.76	0.5	16.6	0.00613	0.3	1.3	0.174978	0	0	0
ENSMUSG00000031303	MAP3K15	mitogen-activated protein kinase kinase kinase 15	None	MAPK cascade|MAPK cascade|activation of MAPKK activity|activation of MAPKK activity|protein phosphorylation|	MAP kinase kinase kinase activity|ATP binding|metal ion binding|	10	-0.7	11.7	-11.7	10	-0.7	5.33	-5.33	-0.7	16.6	0.00613	-1.2	-0.4	0.174978	0	0	0
ENSMUSG00000020914	TOP2A	topoisomerase (DNA) II alpha 170kDa	nuclear chromosome|condensed chromosome|nucleus|nucleoplasm|nucleoplasm|nucleolus|centriole|DNA topoisomerase complex (ATP-hydrolyzing)|viral integration complex|protein complex|	mitotic cell cycle|resolution of meiotic recombination intermediates|sister chromatid segregation|ATP catabolic process|ATP catabolic process|DNA replication|DNA topological change|DNA ligation|DNA unwinding involved in DNA replication|DNA repair|mitotic recombination|cellular response to DNA damage stimulus|chromosome segregation|apoptotic chromosome condensation|embryonic cleavage|positive regu…	magnesium ion binding|DNA binding|chromatin binding|DNA topoisomerase type II (ATP-hydrolyzing) activity|protein kinase C binding|protein binding|ATP binding|protein C-terminus binding|DNA-dependent ATPase activity|drug binding|DNA binding, bending|enzyme binding|protein homodimerization activity|histone deacetylase binding|ubiquitin binding|poly(A) RNA binding|protein heterodimerization activity|	4	1.1	11.9	11.9	5	0.9	5.23	5.23	1.1	16.6	0.00613	0.7	1.9	0.174978	0	0	0
ENSMUSG00000058440	NRF1	nuclear respiratory factor 1	nucleoplasm|cytoplasm|extracellular vesicular exosome|	response to hypoxia|generation of precursor metabolites and energy|transcription, DNA-templated|regulation of transcription from RNA polymerase II promoter|mitochondrion organization|organ regeneration|response to estradiol|response to lipopolysaccharide|cellular lipid metabolic process|small molecule metabolic process|positive regulation of transcription from RNA polymerase II promoter|response …	RNA polymerase II core promoter proximal region sequence-specific DNA binding|RNA polymerase II core promoter proximal region sequence-specific DNA binding transcription factor activity involved in positive regulation of transcription|RNA polymerase II core promoter proximal region sequence-specific DNA binding transcription factor activity involved in positive regulation of transcription|	10	1	14.6	14.6	10	0.5	4.17	4.17	1	16.6	0.00613	0.6	1.6	0.174978	0	0	0
ENSMUSG00000021248	TMED10	transmembrane emp24-like trafficking protein 10 (yeast)	Golgi membrane|Golgi membrane|endoplasmic reticulum|endoplasmic reticulum membrane|endoplasmic reticulum-Golgi intermediate compartment|Golgi apparatus|cis-Golgi network|plasma membrane|integral component of membrane|COPI-coated vesicle|trans-Golgi network transport vesicle|transport vesicle membrane|secretory granule membrane|endoplasmic reticulum-Golgi intermediate compartment membrane|melanoso…	response to acid|kidney development|intracellular protein transport|ER to Golgi vesicle-mediated transport|retrograde vesicle-mediated transport, Golgi to ER|Golgi organization|beta-amyloid formation|cargo loading into vesicle|COPI-coated vesicle budding|response to alkaloid|regulated secretory pathway|vesicle targeting, to, from or within Golgi|COPI coating of Golgi vesicle|COPII vesicle coating…	protein binding|syntaxin binding|protein complex binding|	10	-0.8	15.5	-15.5	10	-0.9	1.48	-1.48	-0.8	16.6	0.00613	-1.5	-0.4	0.174978	0	0	0
ENSMUSG00000028149	RAP1GDS1	RAP1, GTP-GDP dissociation stimulator 1	mitochondrion|endoplasmic reticulum|cytosol|extracellular vesicular exosome|	vascular smooth muscle contraction|myosin filament assembly|positive regulation of Rho GTPase activity|negative regulation of endoplasmic reticulum calcium ion concentration|positive regulation of mitochondrial calcium ion concentration|	GTPase activator activity|	10	-1.8	17.8	-17.8	10	-0.3	0.228	-0.228	-1.8	16.6	0.00613	-3	-0.9	0.174978	0	0	0
ENSMUSG00000021194	CHGA	chromogranin A (parathyroid secretory protein 1)	extracellular region|secretory granule|transport vesicle membrane|perinuclear region of cytoplasm|	regulation of blood pressure|	None	10	-0.5	7.81	-7.81	10	-1.3	12.4	-12.4	-0.8	16.5	0.00622	-1.7	-0.4	0.174152	0	0	0
ENSMUSG00000031917	NIP7	NIP7, nucleolar pre-rRNA processing protein	nucleolus|	ribosome assembly|	protein binding|poly(A) RNA binding|	9	1.1	5.77	5.77	8	1.4	11.8	11.8	1.2	16.5	0.00622	0.8	2.4	0.174152	0	0	0
ENSMUSG00000048429	1810026J23RIK	RIKEN cDNA 1810026J23 gene	cellular_component|	biological_process|	molecular_function|	9	1.1	10.6	10.6	6	0.6	7.62	7.62	1	16.5	0.00622	0.5	1.7	0.174152	0	0	0
ENSMUSG00000044139	PRSS53	protease, serine, 53	extracellular region|	proteolysis|	serine-type endopeptidase activity|	9	-1	13.4	-13.4	8	-1.3	3.73	-3.73	-1	16.5	0.00622	-2	-0.6	0.174152	0	0	0
ENSMUSG00000066750	OLFR876	olfactory receptor 876	plasma membrane|membrane|integral component of membrane|	signal transduction|G-protein coupled receptor signaling pathway|sensory perception of smell|response to stimulus|detection of chemical stimulus involved in sensory perception of smell|	signal transducer activity|G-protein coupled receptor activity|olfactory receptor activity|	10	-1.8	19.2	-19.2	10	0.1	0.0292	0.0292	-1.8	16.5	0.00622	-3	-1	0.174152	0	0	0
ENSMUSG00000010066	CACNA2D2	calcium channel, voltage-dependent, alpha 2/delta subunit 2	plasma membrane|voltage-gated calcium channel complex|	energy reserve metabolic process|neuromuscular junction development|regulation of ion transmembrane transport|regulation of multicellular organism growth|small molecule metabolic process|positive regulation of organ growth|muscle fiber development|regulation of insulin secretion|rhythmic synaptic transmission|calcium ion transmembrane transport|	voltage-gated calcium channel activity|metal ion binding|	10	-1.2	6.86	-6.86	10	-1.8	11.2	-11.2	-1.4	16.4	0.0063	-2.9	-0.9	0.175195	0	0	0
ENSMUSG00000078941	TAF9	TAF9 RNA polymerase II, TATA box binding protein (TBP)-associated factor, 32kDa	PCAF complex|nucleoplasm|transcription factor TFIID complex|STAGA complex|transcription factor TFTC complex|pre-snoRNP complex|MLL1 complex|	chromatin organization|transcription from RNA polymerase II promoter|transcription initiation from RNA polymerase II promoter|transcription elongation from RNA polymerase II promoter|cellular response to DNA damage stimulus|gene expression|viral process|positive regulation of cell growth|negative regulation of proteasomal ubiquitin-dependent protein catabolic process|negative regulation of apopto…	p53 binding|DNA binding|transcription coactivator activity|transcription coactivator activity|histone acetyltransferase activity|protein binding|activating transcription factor binding|transcription regulatory region DNA binding|protein heterodimerization activity|C2H2 zinc finger domain binding|	9	0.9	8.55	8.55	9	1.5	9.68	9.68	1.1	16.4	0.0063	0.5	2.2	0.175195	0	0	0
ENSMUSG00000021125	ARG2	arginase 2	mitochondrion|mitochondrial matrix|	urea cycle|urea cycle|ureteric bud development|arginine metabolic process|nitric oxide biosynthetic process|striated muscle contraction|cellular nitrogen compound metabolic process|small molecule metabolic process|	arginase activity|metal ion binding|	10	1.3	7.6	7.6	10	1.6	9.46	9.46	1.4	16.4	0.0063	0.9	2.6	0.175195	0	0	0
ENSMUSG00000021003	GALC	galactosylceramidase	mitochondrion|lysosome|lysosomal lumen|extracellular vesicular exosome|	carbohydrate metabolic process|sphingolipid metabolic process|galactosylceramide catabolic process|glycosphingolipid metabolic process|small molecule metabolic process|	galactosylceramidase activity|	10	1.2	9.27	9.27	10	1.4	7.69	7.69	1.3	16.4	0.0063	0.4	2.2	0.175195	0	0	0
ENSMUSG00000026361	CDC73	cell division cycle 73	nucleus|Cdc73/Paf1 complex|	negative regulation of transcription from RNA polymerase II promoter|endodermal cell fate commitment|transcription, DNA-templated|mRNA polyadenylation|cell cycle|negative regulation of cell proliferation|histone monoubiquitination|Wnt signaling pathway|stem cell maintenance|positive regulation of Wnt signaling pathway|positive regulation of mRNA 3'-end processing|protein destabilization|positive …	RNA polymerase II core binding|protein binding|	9	0.9	14.2	14.2	9	1.5	5.08	5.08	0.9	16.4	0.0063	0.5	2.1	0.175195	0	0	0
ENSMUSG00000024218	TAF11	TAF11 RNA polymerase II, TATA box binding protein (TBP)-associated factor, 28kDa	nucleus|nucleoplasm|transcription factor TFIID complex|Golgi apparatus|	regulation of transcription, DNA-templated|transcription from RNA polymerase II promoter|transcription from RNA polymerase II promoter|transcription initiation from RNA polymerase II promoter|transcription initiation from RNA polymerase II promoter|transcription elongation from RNA polymerase II promoter|gene expression|viral process|positive regulation by host of viral transcription|	DNA binding|transcription coactivator activity|protein binding|vitamin D receptor binding|thyroid hormone receptor binding|protein heterodimerization activity|protein N-terminus binding|	10	1.6	15.8	15.8	10	1.1	1.94	1.94	1.5	16.4	0.0063	0.6	2.4	0.175195	0	0	0
ENSMUSG00000013160	ATP6V0D1	ATPase, H+ transporting, lysosomal 38kDa, V0 subunit d1	lysosomal membrane|early endosome|centrosome|synaptic vesicle|endosome membrane|membrane|apical plasma membrane|vacuolar proton-transporting V-type ATPase complex|vacuolar proton-transporting V-type ATPase complex|phagocytic vesicle membrane|proton-transporting V-type ATPase, V0 domain|axon terminus|extracellular vesicular exosome|	cellular iron ion homeostasis|activation of signaling protein activity involved in unfolded protein response|brain development|insulin receptor signaling pathway|ATP hydrolysis coupled proton transport|proton transport|endoplasmic reticulum unfolded protein response|transferrin transport|cilium assembly|cellular protein metabolic process|interaction with host|transmembrane transport|phagosome mat…	protein binding|hydrogen-exporting ATPase activity, phosphorylative mechanism|protein complex binding|	10	-1.1	17.9	-17.9	10	-0.3	1.15	-1.15	-1	16.4	0.0063	-1.6	-0.5	0.175195	0	0	0
ENSMUSG00000025993	SLC40A1	solute carrier family 40 (iron-regulated transporter), member 1	intracellular|cytoplasm|multivesicular body|plasma membrane|plasma membrane|integral component of plasma membrane|synaptic vesicle|integral component of membrane|basolateral plasma membrane|	lymphocyte homeostasis|endothelium development|cellular iron ion homeostasis|cellular iron ion homeostasis|anatomical structure morphogenesis|iron ion transmembrane transport|negative regulation of apoptotic process|transmembrane transport|spleen trabecula formation|multicellular organismal iron ion homeostasis|	iron ion transmembrane transporter activity|protein binding|	10	-1.4	18.4	-18.4	10	-0.3	0.625	-0.625	-1.1	16.4	0.0063	-2.1	-0.4	0.175195	0	0	0
ENSMUSG00000019977	HBS1L	HBS1-like translational GTPase	membrane|extracellular vesicular exosome|	GTP catabolic process|translation|translational elongation|signal transduction|	translation elongation factor activity|GTPase activity|GTP binding|	10	1.4	8.87	8.87	10	0.7	9.32	9.32	0.7	16.3	0.00646	0.3	1.7	0.177715	0	0	0
ENSMUSG00000070699	SARS2	seryl-tRNA synthetase 2, mitochondrial	mitochondrion|mitochondrial matrix|	tRNA aminoacylation for protein translation|seryl-tRNA aminoacylation|gene expression|selenocysteinyl-tRNA(Sec) biosynthetic process|	serine-tRNA ligase activity|serine-tRNA ligase activity|ATP binding|poly(A) RNA binding|	9	0.7	9.69	9.69	9	0.7	7.04	7.04	0.7	16.3	0.00646	0.4	1.2	0.177715	0	0	0
ENSMUSG00000020808	FAM64A	family with sequence similarity 64, member A	nucleus|nucleolus|cytoplasm|	mitotic nuclear division|	protein binding|	9	-0.9	12.4	-12.4	9	-1.4	5.75	-5.75	-1	16.3	0.00646	-1.9	-0.5	0.177715	0	0	0
ENSMUSG00000002948	MAP2K7	mitogen-activated protein kinase kinase 7	nucleus|cytoplasm|cytosol|	toll-like receptor signaling pathway|MyD88-dependent toll-like receptor signaling pathway|MyD88-independent toll-like receptor signaling pathway|apoptotic process|response to stress|signal transduction|JNK cascade|activation of JUN kinase activity|peptidyl-tyrosine phosphorylation|toll-like receptor 2 signaling pathway|toll-like receptor 3 signaling pathway|toll-like receptor 4 signaling pathway|…	magnesium ion binding|protein serine/threonine kinase activity|MAP kinase kinase activity|protein tyrosine kinase activity|protein binding|ATP binding|protein C-terminus binding|JUN kinase kinase activity|protein kinase binding|protein phosphatase binding|mitogen-activated protein kinase kinase kinase binding|	10	1.2	12.9	12.9	10	0.8	4.42	4.42	1	16.3	0.00646	0.5	1.7	0.177715	0	0	0
ENSMUSG00000052997	UBA2	ubiquitin-like modifier activating enzyme 2	nucleoplasm|cytosol|SUMO activating enzyme complex|	protein sumoylation|protein sumoylation|protein sumoylation|SMT3-dependent protein catabolic process|positive regulation of catalytic activity|post-translational protein modification|cellular protein metabolic process|	protein binding|ATP binding|enzyme activator activity|transcription factor binding|ligase activity|SUMO activating enzyme activity|SUMO activating enzyme activity|metal ion binding|protein heterodimerization activity|	7	1.3	13.9	13.9	6	0.8	3.77	3.77	1.2	16.3	0.00646	0.7	1.9	0.177715	0	0	0
ENSMUSG00000020719	DDX5	DEAD (Asp-Glu-Ala-Asp) box helicase 5	nucleus|nucleus|nucleolus|membrane|ribonucleoprotein complex|extracellular vesicular exosome|catalytic step 2 spliceosome|	negative regulation of transcription from RNA polymerase II promoter|regulation of alternative mRNA splicing, via spliceosome|mRNA splicing, via spliceosome|in utero embryonic development|ATP catabolic process|transcription, DNA-templated|circadian rhythm|cell growth|positive regulation of intracellular estrogen receptor signaling pathway|positive regulation of DNA damage response, signal transdu…	transcription coactivator activity|RNA helicase activity|RNA helicase activity|ATP-dependent RNA helicase activity|protein binding|calmodulin binding|ATP binding|enzyme binding|estrogen receptor binding|pre-mRNA binding|poly(A) RNA binding|calcium-dependent protein binding|androgen receptor binding|	8	1	13.7	13.7	7	0.9	3.09	3.09	1	16.3	0.00646	0.4	1.6	0.177715	0	0	0
ENSMUSG00000040681	HMGN1	high mobility group nucleosome binding domain 1	chromatin|nucleus|cytoplasm|	pyrimidine dimer repair by nucleotide-excision repair|transcription-coupled nucleotide-excision repair|chromatin organization|regulation of transcription from RNA polymerase II promoter|response to UV-B|response to UV-C|positive regulation of DNA-templated transcription, elongation|regulation of development, heterochronic|post-embryonic camera-type eye morphogenesis|regulation of epithelial cell …	DNA binding|nucleosomal DNA binding|	10	-0.7	9.13	-9.13	10	-1.8	11.8	-11.8	-0.8	16.2	0.00659	-2.3	-0.4	0.179843	0	0	0
ENSMUSG00000045482	TRRAP	transformation/transcription domain-associated protein	PCAF complex|Swr1 complex|nucleus|nucleoplasm|STAGA complex|transcription factor TFTC complex|NuA4 histone acetyltransferase complex|	chromatin organization|transcription, DNA-templated|regulation of transcription, DNA-templated|mitotic cell cycle checkpoint|histone acetylation|histone deubiquitination|histone H4 acetylation|histone H2A acetylation|	transcription cofactor activity|transcription coactivator activity|protein binding|phosphotransferase activity, alcohol group as acceptor|	10	0.7	7.55	7.55	10	1.4	10.4	10.4	0.9	16.2	0.00659	0.5	2	0.179843	0	0	0
ENSMUSG00000047238	MAGEH1	melanoma antigen family H, 1	cytoplasm|	apoptotic process|	None	10	-0.9	7.77	-7.77	10	-0.8	8.89	-8.89	-0.9	16.2	0.00659	-1.4	-0.5	0.179843	0	0	0
ENSMUSG00000018501	NCOR1	nuclear receptor corepressor 1	histone deacetylase complex|nuclear chromatin|nucleus|nucleus|nucleoplasm|transcription factor complex|cytoplasm|spindle microtubule|membrane|Sin3 complex|transcriptional repressor complex|	negative regulation of transcription from RNA polymerase II promoter|negative regulation of transcription from RNA polymerase II promoter|CD4-positive, CD25-positive, alpha-beta regulatory T cell differentiation|transcription, DNA-templated|transcription from RNA polymerase II promoter|transcription initiation from RNA polymerase II promoter|transforming growth factor beta receptor signaling path…	RNA polymerase II activating transcription factor binding|chromatin binding|sequence-specific DNA binding transcription factor activity|transcription corepressor activity|transcription corepressor activity|protein binding|histone deacetylase regulator activity|nuclear hormone receptor binding|histone deacetylase binding|sequence-specific DNA binding|transcription regulatory region DNA binding|ret…	9	-0.7	8.2	-8.2	9	-0.7	8.43	-8.43	-0.7	16.2	0.00659	-1.2	-0.4	0.179843	0	0	0
ENSMUSG00000051329	NUP160	nucleoporin 160kDa	kinetochore|nuclear envelope|nuclear pore|cytosol|nuclear pore outer ring|nuclear pore outer ring|	mitotic cell cycle|carbohydrate metabolic process|mRNA export from nucleus|mitotic nuclear envelope disassembly|hexose transport|regulation of glucose transport|protein transport|glucose transport|viral process|cytokine-mediated signaling pathway|small molecule metabolic process|transmembrane transport|	nucleocytoplasmic transporter activity|protein binding|	5	1.5	10.2	10.2	4	0.9	7.43	7.43	1.4	16.2	0.00659	0.7	2.6	0.179843	0	0	0
ENSMUSG00000047547	CLTB	clathrin, light chain B	trans-Golgi network|clathrin coat|clathrin coat|clathrin coat of trans-Golgi network vesicle|clathrin coat of coated pit|ciliary membrane|	intracellular protein transport|vesicle-mediated transport|	structural molecule activity|protein binding|peptide binding|	9	-1.5	10.7	-10.7	9	-0.8	7.31	-7.31	-0.8	16.2	0.00659	-1.8	-0.4	0.179843	0	0	0
ENSMUSG00000040325	VPRBP	Vpr (HIV-1) binding protein	nucleus|cytoplasm|COP9 signalosome|	negative regulation of transcription from RNA polymerase II promoter|transcription, DNA-templated|viral process|protein ubiquitination|B cell differentiation|V(D)J recombination|cell competition in a multicellular organism|histone H2A-T120 phosphorylation|	protein binding|ATP binding|histone kinase activity (H2A-T120 specific)|	10	0.7	10.2	10.2	10	0.6	6.51	6.51	0.6	16.2	0.00659	0.3	1.1	0.179843	0	0	0
ENSMUSG00000034459	IFIT1	interferon-induced protein with tetratricopeptide repeats 1	cytoplasm|cytosol|	response to virus|response to virus|intracellular transport of viral protein in host cell|cytokine-mediated signaling pathway|negative regulation of protein binding|positive regulation of viral genome replication|negative regulation of viral genome replication|negative regulation of defense response to virus by host|negative regulation of helicase activity|defense response to virus|type I interfe…	RNA binding|protein binding|	10	-0.8	10.6	-10.6	10	-0.9	6.09	-6.09	-0.8	16.2	0.00659	-1.4	-0.5	0.179843	0	0	0
ENSMUSG00000026491	AHCTF1	AT hook containing transcription factor 1	condensed chromosome kinetochore|chromatin|nucleus|nuclear pore|nucleoplasm|cytosol|nuclear matrix|nuclear pore outer ring|nuclear membrane|extracellular vesicular exosome|	mitotic cell cycle|cytokinesis|regulation of transcription, DNA-templated|protein transport|mRNA transport|nuclear pore complex assembly|	DNA binding|sequence-specific DNA binding transcription factor activity|	9	0.8	11	11	9	1	6.08	6.08	0.9	16.2	0.00659	0.5	1.5	0.179843	0	0	0
ENSMUSG00000096024	GM17174	N/A	None	None	None	8	-1.4	15.8	-15.8	8	-0.7	2.89	-2.89	-1.4	16.2	0.00659	-2.5	-0.8	0.179843	0	0	0
ENSMUSG00000005732	RANBP1	RAN binding protein 1	nucleus|nuclear envelope|cytoplasm|centrosome|	spindle organization|signal transduction|viral process|positive regulation of GTPase activity|positive regulation of mitotic centrosome separation|intracellular transport|regulation of catalytic activity|	GDP-dissociation inhibitor activity|GTPase activator activity|Ran GTPase binding|	10	0.7	4.38	4.38	10	0.9	12.3	12.3	0.8	16.1	0.00668	0.5	1.5	0.179904	0	0	0
ENSMUSG00000023456	TPI1	triosephosphate isomerase 1	extracellular space|nucleus|cytosol|extracellular vesicular exosome|	carbohydrate metabolic process|glucose metabolic process|gluconeogenesis|gluconeogenesis|glycolytic process|glycolytic process|pentose-phosphate shunt|embryo development|glyceraldehyde-3-phosphate metabolic process|small molecule metabolic process|	triose-phosphate isomerase activity|triose-phosphate isomerase activity|triose-phosphate isomerase activity|protein binding|	10	1.1	6.84	6.84	10	1.9	11.9	11.9	1.7	16.1	0.00668	0.7	3.4	0.179904	0	0	0
ENSMUSG00000052456	ASNA1	arsA arsenite transporter, ATP-binding, homolog 1 (bacterial)	nucleus|nucleolus|cytoplasm|endoplasmic reticulum|extracellular vesicular exosome|	ATP catabolic process|transport|inorganic anion transport|protein insertion into ER membrane|	transporter activity|ATP binding|arsenite transmembrane transporter activity|ATPase activity|metal ion binding|	8	-1.6	6.36	-6.36	8	-1.2	10.7	-10.7	-1.5	16.1	0.00668	-2.6	-0.8	0.179904	0	0	0
ENSMUSG00000078317	F8A	factor 8-associated gene A	nucleus|	biological_process|	molecular_function|	10	-0.6	8.81	-8.81	10	-1	9.81	-9.81	-0.7	16.1	0.00668	-1.4	-0.4	0.179904	0	0	0
ENSMUSG00000064284	CDPF1	cysteine-rich, DPF motif domain containing 1	None	None	None	10	-0.6	9.07	-9.07	10	-1.5	8.26	-8.26	-1.2	16.1	0.00668	-2	-0.5	0.179904	0	0	0
ENSMUSG00000002763	PEX6	peroxisomal biogenesis factor 6	cytoplasm|peroxisome|peroxisomal membrane|cytosol|	ATP catabolic process|protein targeting to peroxisome|peroxisome organization|protein import into peroxisome matrix, translocation|protein stabilization|	protein binding|ATP binding|protein C-terminus binding|ATPase activity|protein complex binding|ATPase activity, coupled|	10	-0.7	9.82	-9.82	10	-0.8	6.95	-6.95	-0.7	16.1	0.00668	-1.2	-0.4	0.179904	0	0	0
ENSMUSG00000031928	MRE11A	MRE11 meiotic recombination 11 homolog A (S. cerevisiae)	chromosome, telomeric region|chromatin|nucleus|nucleoplasm|cytosol|Mre11 complex|Mre11 complex|site of double-strand break|	regulation of mitotic recombination|telomere maintenance|double-strand break repair via homologous recombination|DNA catabolic process, endonucleolytic|DNA repair|base-excision repair|nucleotide-excision repair|double-strand break repair|double-strand break repair|double-strand break repair via nonhomologous end joining|DNA recombination|cellular response to DNA damage stimulus|telomere maintenan…	single-stranded DNA endodeoxyribonuclease activity|DNA binding|double-stranded DNA binding|ATP-dependent DNA helicase activity|nuclease activity|endonuclease activity|endodeoxyribonuclease activity|protein binding|protein C-terminus binding|3'-5' exonuclease activity|manganese ion binding|	10	1.1	10.5	10.5	10	0.6	6.77	6.77	0.7	16.1	0.00668	0.4	1.4	0.179904	0	0	0
ENSMUSG00000062312	ERBB2	v-erb-b2 avian erythroblastic leukemia viral oncogene homolog 2	nucleus|cytoplasm|plasma membrane|plasma membrane|plasma membrane|endosome membrane|integral component of membrane|basolateral plasma membrane|apical plasma membrane|cytoplasmic vesicle|receptor complex|receptor complex|perinuclear region of cytoplasm|	positive regulation of protein phosphorylation|transcription, DNA-templated|protein phosphorylation|signal transduction|cell surface receptor signaling pathway|enzyme linked receptor protein signaling pathway|transmembrane receptor protein tyrosine kinase signaling pathway|transmembrane receptor protein tyrosine kinase signaling pathway|epidermal growth factor receptor signaling pathway|nervous s…	RNA polymerase I core binding|protein tyrosine kinase activity|protein tyrosine kinase activity|protein tyrosine kinase activity|transmembrane receptor protein tyrosine kinase activity|receptor signaling protein tyrosine kinase activity|transmembrane signaling receptor activity|epidermal growth factor-activated receptor activity|protein binding|ATP binding|protein C-terminus binding|growth factor…	10	0.5	13.1	13.1	10	0.4	3.68	3.68	0.5	16.1	0.00668	0.3	0.9	0.179904	0	0	0
ENSMUSG00000037989	WNK2	WNK lysine deficient protein kinase 2	cytoplasm|plasma membrane|	protein phosphorylation|negative regulation of cell proliferation|intracellular signal transduction|protein autophosphorylation|negative regulation of ERK1 and ERK2 cascade|regulation of ion homeostasis|positive regulation of sodium ion transmembrane transporter activity|	protein serine/threonine kinase activity|ATP binding|	10	-0.9	14.9	-14.9	10	-0.9	1.43	-1.43	-0.9	16.1	0.00668	-1.5	-0.5	0.179904	0	0	0
ENSMUSG00000060688	OLFR292	olfactory receptor 292	plasma membrane|membrane|integral component of membrane|	signal transduction|G-protein coupled receptor signaling pathway|sensory perception of smell|response to stimulus|detection of chemical stimulus involved in sensory perception of smell|	signal transducer activity|G-protein coupled receptor activity|olfactory receptor activity|	9	0.4	1.03	1.03	10	2.1	18.4	18.4	2	16	0.00675	0.8	4	0.179664	0	0	0
ENSMUSG00000036285	NOA1	nitric oxide associated 1	mitochondrion|extrinsic component of mitochondrial inner membrane|	GTP catabolic process|apoptotic process|regulation of cell death|mitochondrial translation|ribosome biogenesis|regulation of cellular respiration|	GTPase activity|protein binding|GTP binding|poly(A) RNA binding|	10	-0.5	5.02	-5.02	10	-1	13.6	-13.6	-0.8	16	0.00675	-1.4	-0.5	0.179664	0	0	0
ENSMUSG00000094284	VMN1R112	vomeronasal 1 receptor 112	cellular_component|membrane|integral component of membrane|	signal transduction|G-protein coupled receptor signaling pathway|biological_process|response to stimulus|sensory perception of taste|	molecular_function|signal transducer activity|G-protein coupled receptor activity|	10	1.3	4.45	4.45	10	1	12.7	12.7	1.2	16	0.00675	0.7	1.9	0.179664	0	0	0
ENSMUSG00000095619	VMN1R157	vomeronasal 1 receptor 157	cellular_component|	biological_process|	molecular_function|	10	1.3	4.45	4.45	10	1	12.7	12.7	1.2	16	0.00675	0.7	1.9	0.179664	0	0	0
ENSMUSG00000023764	SFI1	Sfi1 homolog, spindle assembly associated (yeast)	centriole|cytosol|	G2/M transition of mitotic cell cycle|mitotic cell cycle|negative regulation of phosphatase activity|	protein binding|phosphatase binding|	6	1	6.55	6.55	6	1.2	10.1	10.1	1.1	16	0.00675	0.8	1.9	0.179664	0	0	0
ENSMUSG00000036921	4930549C01RIK	RIKEN cDNA 4930549C01 gene	cellular_component|	biological_process|	molecular_function|	10	-0.7	9.28	-9.28	10	-1.1	7.8	-7.8	-0.8	16	0.00675	-1.6	-0.5	0.179664	0	0	0
ENSMUSG00000073000	GM10451	predicted gene 10451	None	None	None	10	-0.7	9.67	-9.67	10	-1	6.86	-6.86	-0.8	16	0.00675	-1.5	-0.4	0.179664	0	0	0
ENSMUSG00000005103	WDR1	WD repeat domain 1	podosome|extracellular region|cytoplasm|cytosol|cell junction|cell projection|extracellular vesicular exosome|	platelet degranulation|blood coagulation|sensory perception of sound|platelet activation|	actin binding|	10	-1.5	12.5	-12.5	10	-0.9	4.57	-4.57	-1.2	16	0.00675	-2	-0.4	0.179664	0	0	0
ENSMUSG00000068040	TM9SF4	transmembrane 9 superfamily protein member 4	integral component of membrane|	None	None	9	0.9	13	13	9	0.7	3.85	3.85	0.9	16	0.00675	0.5	1.5	0.179664	0	0	0
ENSMUSG00000068874	SELENBP1	selenium binding protein 1	extracellular space|nucleus|cytosol|membrane|extracellular vesicular exosome|	protein transport|	protein binding|selenium binding|	10	-0.7	14.9	-14.9	10	-0.4	1.76	-1.76	-0.6	16	0.00675	-1.2	-0.3	0.179664	0	0	0
ENSMUSG00000045328	CENPE	centromere protein E, 312kDa	chromosome, centromeric region|kinetochore|condensed nuclear chromosome kinetochore|condensed chromosome, centromeric region|condensed chromosome outer kinetochore|nucleus|cytoplasm|spindle|cytosol|kinesin complex|microtubule|microtubule cytoskeleton|membrane|	mitotic metaphase|mitotic cell cycle|microtubule-based movement|mitotic chromosome movement towards spindle pole|mitotic metaphase plate congression|multicellular organismal development|blood coagulation|metabolic process|metabolic process|antigen processing and presentation of exogenous peptide antigen via MHC class II|positive regulation of protein kinase activity|kinetochore assembly|	microtubule motor activity|protein binding|ATP binding|microtubule binding|kinetochore binding|	10	-1.2	18.1	-18.1	10	0	0	0	-1.2	16	0.00675	-1.9	-0.8	0.179664	0	0	0
ENSMUSG00000031329	TSX	testis specific X-linked gene	nucleus|cytoplasm|	male gonad development|fertilization|adult behavior|	molecular_function|	10	0.5	3.22	3.22	10	2.1	17.5	17.5	2	15.9	0.00684	0.7	4	0.179495	0	0	0
ENSMUSG00000001767	CRNKL1	crooked neck pre-mRNA splicing factor 1	spliceosomal complex|cytoplasm|nuclear speck|catalytic step 2 spliceosome|	spliceosomal complex assembly|mRNA splicing, via spliceosome|	RNA binding|protein binding|poly(A) RNA binding|	10	-0.5	3.73	-3.73	10	-1.5	16.4	-16.4	-1.1	15.9	0.00684	-2.2	-0.5	0.179495	0	0	0
ENSMUSG00000028291	AKIRIN2	akirin 2	nucleus|transcriptional repressor complex|	negative regulation of transcription from RNA polymerase II promoter|transcription, DNA-templated|positive regulation of cell proliferation|embryo development|positive regulation of endopeptidase activity|response to lipopolysaccharide|positive regulation of interleukin-6 production|innate immune response|positive regulation of transcription from RNA polymerase II promoter|	enzyme binding|	10	-1	4.71	-4.71	10	-1	11.6	-11.6	-1	15.9	0.00684	-1.6	-0.5	0.179495	0	0	0
ENSMUSG00000053916	NANP	N-acetylneuraminic acid phosphatase	cellular_component|	carbohydrate metabolic process|N-acetylglucosamine biosynthetic process|dephosphorylation|dephosphorylation|N-acetylneuraminate biosynthetic process|	N-acylneuraminate-9-phosphatase activity|	10	1.2	7.42	7.42	10	0.6	10.4	10.4	0.7	15.9	0.00684	0.3	1.5	0.179495	0	0	0
ENSMUSG00000056501	CEBPB	CCAAT/enhancer binding protein (C/EBP), beta	nuclear chromatin|nucleus|nucleoplasm|cytoplasm|nuclear matrix|	embryonic placenta development|regulation of transcription, DNA-templated|transcription from RNA polymerase II promoter|acute-phase response|inflammatory response|immune response|neuron differentiation|response to lipopolysaccharide|mammary gland epithelial cell proliferation|response to endoplasmic reticulum stress|negative regulation of neuron apoptotic process|regulation of interleukin-6 biosy…	RNA polymerase II core promoter proximal region sequence-specific DNA binding transcription factor activity involved in positive regulation of transcription|DNA binding|sequence-specific DNA binding transcription factor activity|RNA polymerase II distal enhancer sequence-specific DNA binding transcription factor activity|protein binding|transcription factor binding|glucocorticoid receptor binding…	10	-0.4	8.19	-8.19	10	-0.8	9.59	-9.59	-0.6	15.9	0.00684	-1.1	-0.3	0.179495	0	0	0
ENSMUSG00000049620	PRSS33	protease, serine, 33	extracellular space|	proteolysis|	serine-type endopeptidase activity|	10	1	9.71	9.71	10	0.5	7.61	7.61	0.7	15.9	0.00684	0.3	1.3	0.179495	0	0	0
ENSMUSG00000066149	CDC26	cell division cycle 26	nucleoplasm|anaphase-promoting complex|cytosol|	mitotic cell cycle|mitotic nuclear division|mitotic spindle assembly checkpoint|anaphase-promoting complex-dependent proteasomal ubiquitin-dependent protein catabolic process|negative regulation of ubiquitin-protein ligase activity involved in mitotic cell cycle|positive regulation of ubiquitin-protein ligase activity involved in mitotic cell cycle|regulation of ubiquitin-protein ligase activity …	protein binding|	10	1.4	9.72	9.72	9	1	7.56	7.56	1.2	15.9	0.00684	0.8	2.3	0.179495	0	0	0
ENSMUSG00000028848	GPN2	GPN-loop GTPase 2	cellular_component|	biological_process|	molecular_function|GTP binding|	6	-0.9	10.7	-10.7	5	-1.8	7.43	-7.43	-1	15.9	0.00684	-2.5	-0.6	0.179495	0	0	0
ENSMUSG00000028849	MAP7D1	MAP7 domain containing 1	cytoplasm|spindle|microtubule|microtubule cytoskeleton|	microtubule cytoskeleton organization|	None	10	-0.7	9.22	-9.22	10	-0.8	7.22	-7.22	-0.7	15.9	0.00684	-1.2	-0.4	0.179495	0	0	0
ENSMUSG00000022360	ATAD2	ATPase family, AAA domain containing 2	nucleus|extracellular vesicular exosome|	ATP catabolic process|transcription, DNA-templated|positive regulation of transcription, DNA-templated|	ATP binding|ATPase activity|	9	1.1	10.2	10.2	9	0.8	6.5	6.5	1	15.9	0.00684	0.6	1.7	0.179495	0	0	0
ENSMUSG00000007050	LSM2	LSM2 homolog, U6 small nuclear RNA associated (S. cerevisiae)	nucleoplasm|cytosol|catalytic step 2 spliceosome|	nuclear-transcribed mRNA catabolic process, deadenylation-dependent decay|mRNA splicing, via spliceosome|mRNA splicing, via spliceosome|RNA splicing|gene expression|RNA metabolic process|mRNA metabolic process|exonucleolytic nuclear-transcribed mRNA catabolic process involved in deadenylation-dependent decay|	protein binding|U6 snRNA binding|protein kinase binding|poly(A) RNA binding|	6	1.2	10.3	10.3	6	1.3	5.98	5.98	1.2	15.9	0.00684	0.6	3	0.179495	0	0	0
ENSMUSG00000020430	PES1	pescadillo ribosomal biogenesis factor 1	condensed chromosome|nucleoplasm|nucleolus|cytoplasm|membrane|preribosome, large subunit precursor|PeBoW complex|	maturation of LSU-rRNA from tricistronic rRNA transcript (SSU-rRNA, 5.8S rRNA, LSU-rRNA)|maturation of 5.8S rRNA from tricistronic rRNA transcript (SSU-rRNA, 5.8S rRNA, LSU-rRNA)|rRNA processing|nucleolus organization|cell proliferation|cell proliferation|protein localization to organelle|ribosomal large subunit biogenesis|regulation of cell cycle|	protein binding|ribonucleoprotein complex binding|poly(A) RNA binding|	7	1.2	15.1	15.1	6	0.5	3	3	1.1	15.9	0.00684	0.5	1.8	0.179495	0	0	0
ENSMUSG00000048540	NHLH2	nescient helix loop helix 2	nucleus|transcription factor complex|	transcription, DNA-templated|central nervous system development|mating behavior|cell differentiation|ovulation cycle|positive regulation of transcription from RNA polymerase II promoter|positive regulation of sequence-specific DNA binding transcription factor activity|	RNA polymerase II activating transcription factor binding|DNA binding|protein binding|protein dimerization activity|	10	-0.7	4.38	-4.38	10	-1.7	15.8	-15.8	-1.6	15.8	0.00691	-2.7	-0.7	0.178588	0	0	0
ENSMUSG00000029265	DR1	down-regulator of transcription 1, TBP-binding (negative cofactor 2)	nucleus|Ada2/Gcn5/Ada3 transcription activator complex|	negative regulation of transcription from RNA polymerase II promoter|chromatin organization|transcription, DNA-templated|histone H3 acetylation|	DNA binding|transcription corepressor activity|protein binding|transcription factor binding|TBP-class protein binding|sequence-specific DNA binding|protein heterodimerization activity|	7	0.6	7.14	7.14	7	1.4	13.1	13.1	1.2	15.8	0.00691	0.5	2.3	0.178588	0	0	0
ENSMUSG00000001891	UGP2	UDP-glucose pyrophosphorylase 2	nucleus|cytosol|extracellular vesicular exosome|	carbohydrate metabolic process|glycogen biosynthetic process|glucose metabolic process|UDP-glucose metabolic process|UDP-glucuronate biosynthetic process|xenobiotic metabolic process|glucose 1-phosphate metabolic process|small molecule metabolic process|cellular glucuronidation|	UTP:glucose-1-phosphate uridylyltransferase activity|UTP:glucose-1-phosphate uridylyltransferase activity|protein binding|glucose binding|pyrimidine ribonucleotide binding|metal ion binding|	10	-0.4	6.7	-6.7	10	-0.9	10.1	-10.1	-0.9	15.8	0.00691	-1.5	-0.4	0.178588	0	0	0
ENSMUSG00000091700	GM7876	predicted gene 7876	cellular_component|	biological_process|	molecular_function|	10	0.9	7.58	7.58	10	0.8	8.71	8.71	0.8	15.8	0.00691	0.5	1.5	0.178588	0	0	0
ENSMUSG00000091148	GM3182	predicted gene 3182	cellular_component|	biological_process|	molecular_function|	10	0.9	7.58	7.58	10	0.8	8.71	8.71	0.8	15.8	0.00691	0.5	1.5	0.178588	0	0	0
ENSMUSG00000018861	FDXR	ferredoxin reductase	mitochondrion|mitochondrial inner membrane|mitochondrial matrix|	generation of precursor metabolites and energy|steroid biosynthetic process|cholesterol metabolic process|small molecule metabolic process|oxidation-reduction process|NADPH oxidation|	ferredoxin-NADP+ reductase activity|protein binding|NADPH-adrenodoxin reductase activity|NADPH binding|	10	0.7	9.29	9.29	10	0.8	6.88	6.88	0.7	15.8	0.00691	0.4	1.3	0.178588	0	0	0
ENSMUSG00000035161	INTS6	integrator complex subunit 6	nucleus|actin cytoskeleton|integrator complex|	signal transduction|snRNA processing|	transmembrane signaling receptor activity|protein binding|	10	-0.6	9.83	-9.83	10	-0.8	6.67	-6.67	-0.6	15.8	0.00691	-1.1	-0.3	0.178588	0	0	0
ENSMUSG00000000579	DYNLT1C	dynein light chain Tctex-type 1C	cellular_component|	biological_process|	identical protein binding|	10	1	10.4	10.4	10	0.6	6.2	6.2	0.6	15.8	0.00691	0.4	1.3	0.178588	0	0	0
ENSMUSG00000096255	DYNLT1B	dynein light chain Tctex-type 1B	Golgi apparatus|axonemal dynein complex|cytoplasmic dynein complex|cytoplasmic dynein complex|	microtubule-based process|	identical protein binding|	10	1	10.4	10.4	10	0.6	6.2	6.2	0.6	15.8	0.00691	0.4	1.3	0.178588	0	0	0
ENSMUSG00000018160	MED1	mediator complex subunit 1	chromatin|nucleus|nucleoplasm|nucleolus|membrane|mediator complex|mediator complex|protein-DNA complex|	negative regulation of transcription from RNA polymerase II promoter|cell morphogenesis|angiogenesis|liver development|embryonic placenta development|lens development in camera-type eye|thyroid hormone mediated signaling pathway|ventricular trabecula myocardium morphogenesis|retinal pigment epithelium development|DNA replication|regulation of transcription from RNA polymerase I promoter|transcrip…	RNA polymerase II core promoter proximal region sequence-specific DNA binding|sequence-specific DNA binding RNA polymerase II transcription factor activity|core promoter binding|RNA polymerase II transcription cofactor activity|chromatin binding|transcription cofactor activity|transcription coactivator activity|transcription coactivator activity|receptor activity|protein binding|transcription fac…	7	1	11.7	11.7	8	0.7	5.22	5.22	0.9	15.8	0.00691	-1	2	0.178588	0	0	0
ENSMUSG00000035759	BBS10	Bardet-Biedl syndrome 10	cilium|	retina homeostasis|visual perception|nonmotile primary cilium assembly|regulation of protein complex assembly|cellular protein metabolic process|photoreceptor cell maintenance|response to stimulus|chaperone-mediated protein complex assembly|	RNA polymerase II repressing transcription factor binding|protein binding|ATP binding|	10	-1.5	12.2	-12.2	10	-0.9	5.04	-5.04	-0.9	15.8	0.00691	-2	-0.5	0.178588	0	0	0
ENSMUSG00000031931	ANKRD49	ankyrin repeat domain 49	nucleus|	positive regulation of transcription, DNA-templated|	None	10	1	12.8	12.8	10	0.6	4.18	4.18	0.9	15.8	0.00691	0.5	1.5	0.178588	0	0	0
ENSMUSG00000010097	NXF1	nuclear RNA export factor 1	transcription export complex|nuclear pore|nucleoplasm|cytosol|nuclear speck|nuclear inclusion body|	mRNA export from nucleus|mRNA export from nucleus|gene expression|viral process|poly(A)+ mRNA export from nucleus|	nucleotide binding|mRNA binding|nucleocytoplasmic transporter activity|protein binding|poly(A) RNA binding|	8	1.6	12.6	12.6	6	1.3	4.01	4.01	1.6	15.8	0.00691	1	2.8	0.178588	0	0	0
ENSMUSG00000019738	POLR2I	polymerase (RNA) II (DNA directed) polypeptide I, 14.5kDa	nucleus|nucleoplasm|DNA-directed RNA polymerase II, core complex|	mRNA splicing, via spliceosome|maintenance of transcriptional fidelity during DNA-templated transcription elongation from RNA polymerase II promoter|DNA repair|transcription-coupled nucleotide-excision repair|transcription-coupled nucleotide-excision repair|nucleotide-excision repair|transcription from RNA polymerase II promoter|transcription from RNA polymerase II promoter|transcription initiati…	DNA binding|DNA-directed RNA polymerase activity|zinc ion binding|	10	0.5	15.3	15.3	10	0.3	1.21	1.21	0.5	15.8	0.00691	0.3	0.9	0.178588	0	0	0
ENSMUSG00000037343	TAF2	TAF2 RNA polymerase II, TATA box binding protein (TBP)-associated factor, 150kDa	transcription factor TFIID complex|transcription factor TFIID complex|transcription factor TFTC complex|	G2/M transition of mitotic cell cycle|transcription initiation from RNA polymerase II promoter|proteolysis|response to organic cyclic compound|positive regulation of transcription from RNA polymerase II promoter|	protein binding|metallopeptidase activity|zinc ion binding|transcription regulatory region DNA binding|	9	-1	4.04	-4.04	8	1.2	15.5	15.5	1.1	15.7	0.00698	0.7	2.4	0.177268	0	0	0
ENSMUSG00000047423	AI837181	expressed sequence AI837181	cellular_component|	biological_process|	poly(A) RNA binding|	10	-1.5	5.6	-5.6	10	-1.3	10.5	-10.5	-1.4	15.7	0.00698	-2.2	-0.6	0.177268	0	0	0
ENSMUSG00000073834	MUP11	major urinary protein 11	cellular_component|	biological_process|	molecular_function|	7	1.1	7.37	7.37	7	0.8	9.36	9.36	1	15.7	0.00698	0.5	1.7	0.177268	0	0	0
ENSMUSG00000019832	RAB32	RAB32, member RAS oncogene family	mitochondrion|early endosome|membrane|phagocytic vesicle membrane|melanosome|phagocytic vesicle|	small GTPase mediated signal transduction|protein transport|antigen processing and presentation|melanosome organization|endosome to melanosome transport|phagosome maturation|	protein binding|GTP binding|GTP-dependent protein binding|protein complex binding|AP-1 adaptor complex binding|AP-3 adaptor complex binding|	10	0.8	9.13	9.13	9	1.3	8.25	8.25	1	15.7	0.00698	0.5	1.9	0.177268	0	0	0
ENSMUSG00000002233	RHOC	ras homolog family member C	nucleus|cytosol|plasma membrane|cleavage furrow|extracellular vesicular exosome|	cytokinesis|small GTPase mediated signal transduction|axon guidance|positive regulation of I-kappaB kinase/NF-kappaB signaling|apical junction assembly|regulation of small GTPase mediated signal transduction|	signal transducer activity|protein binding|GTP binding|	10	1.1	8.64	8.64	10	0.7	8.06	8.06	0.8	15.7	0.00698	0.3	1.4	0.177268	0	0	0
ENSMUSG00000091400	GM6356	predicted gene 6356	None	None	None	7	1.2	12.6	12.6	7	0.6	5.23	5.23	0.9	15.7	0.00698	0.5	1.7	0.177268	0	0	0
ENSMUSG00000027133	NOP10	NOP10 ribonucleoprotein	nucleolus|small nucleolar ribonucleoprotein complex|Cajal body|box H/ACA RNP complex|	pseudouridine synthesis|rRNA processing|	protein binding|snoRNA binding|	4	0.8	11.8	11.8	5	0.6	4.8	4.8	0.7	15.7	0.00698	0.4	1.6	0.177268	0	0	0
ENSMUSG00000020720	PSMD12	proteasome (prosome, macropain) 26S subunit, non-ATPase, 12	nucleoplasm|cytosol|proteasome regulatory particle|membrane|proteasome accessory complex|extracellular vesicular exosome|	G1/S transition of mitotic cell cycle|protein polyubiquitination|mitotic cell cycle|antigen processing and presentation of peptide antigen via MHC class I|antigen processing and presentation of exogenous peptide antigen via MHC class I, TAP-dependent|regulation of cellular amino acid metabolic process|apoptotic process|DNA damage response, signal transduction by p53 class mediator resulting in ce…	None	6	0.8	12.6	12.6	5	1.2	4.19	4.19	0.9	15.7	0.00698	0.5	1.7	0.177268	0	0	0
[truncated: 22,084 more rows]
