# Supplementary material for: Inter-cellular CRISPR screens reveal regulators of cancer cell phagocytosis
Source: Springer Nature journal article supplement (doi:10.1038/s41586-021-03879-4), 2021-09-08
Supplement: MOESM9 [file 41586_2021_3879_MOESM9_ESM.xlsx]

## Sheet: Fig. 4b
#GeneID	Symbol	GeneInfo	Localization	Process	Function	# elements 1	casTLE Effect 1	casTLE Score 1	# elements 2	casTLE Effect 2	casTLE Score 2	Combo casTLE Effect	Combo casTLE Score	casTLE p-value	Minimum Effect Estimate	Maximum Effect Estimate	10% FDR	5% FDR	1% FDR
ENSMUSG00000024965	FERMT3	fermitin family member 3	podosome|membrane|cell junction|cell projection|extracellular vesicular exosome|	leukocyte cell-cell adhesion|integrin-mediated signaling pathway|integrin activation|regulation of cell-cell adhesion mediated by integrin|substrate adhesion-dependent cell spreading|platelet aggregation|	integrin binding|	10	-2.6	72.2	10	-2.9	102	-2.8	174	9.09e-07	-3.6	-2.3	1	1	0
ENSMUSG00000000290	ITGB2	integrin, beta 2 (complement component 3 receptor 3 and 4 subunit)	plasma membrane|integrin complex|cell surface|membrane|receptor complex|extracellular vesicular exosome|	toll-like receptor signaling pathway|apoptotic process|inflammatory response|cell adhesion|leukocyte cell-cell adhesion|cell-matrix adhesion|integrin-mediated signaling pathway|cell-cell signaling|multicellular organismal development|blood coagulation|regulation of cell shape|extracellular matrix organization|neutrophil chemotaxis|toll-like receptor 4 signaling pathway|innate immune response|regu…	glycoprotein binding|receptor activity|protein binding|protein kinase binding|metal ion binding|	10	-2.9	52.9	10	-3.1	102	-3	154	9.09e-07	-4.2	-2.4	1	1	0
ENSMUSG00000028465	TLN1	talin 1	ruffle|extracellular region|cytoplasm|microtubule organizing center|cytosol|plasma membrane|cell-cell junction|focal adhesion|focal adhesion|focal adhesion|cell surface|actin cytoskeleton|ruffle membrane|extracellular vesicular exosome|	platelet degranulation|cellular component movement|muscle contraction|activation of signaling protein activity involved in unfolded protein response|cytoskeletal anchoring at plasma membrane|cell-cell junction assembly|cell-substrate junction assembly|cell adhesion|axon guidance|blood coagulation|platelet activation|cortical actin cytoskeleton organization|endoplasmic reticulum unfolded protein r…	actin binding|insulin receptor binding|integrin binding|structural constituent of cytoskeleton|protein binding|vinculin binding|LIM domain binding|	10	-1.6	11	10	-3.2	61.2	-2.5	69	9.09e-07	-4.1	-1.6	1	1	0
ENSMUSG00000022488	NCKAP1L	NCK-associated protein 1-like	cytosol|integral component of plasma membrane|membrane|SCAR complex|extracellular vesicular exosome|	B cell homeostasis|myeloid cell homeostasis|protein complex assembly|chemotaxis|maintenance of cell polarity|neutrophil chemotaxis|positive regulation of actin filament polymerization|cortical actin cytoskeleton organization|positive regulation of B cell proliferation|negative regulation of interleukin-17 production|negative regulation of interleukin-6 production|positive regulation of Rac GTPase…	protein binding|protein kinase activator activity|Rac GTPase activator activity|protein complex binding|	10	-2.2	51	10	-1.7	18.6	-1.9	68.5	9.09e-07	-2.9	-1.4	1	1	0
ENSMUSG00000020048	HSP90B1	heat shock protein 90kDa beta (Grp94), member 1	extracellular region|nucleus|endoplasmic reticulum|endoplasmic reticulum|endoplasmic reticulum lumen|endoplasmic reticulum lumen|endoplasmic reticulum membrane|cytosol|plasma membrane|membrane|midbody|melanosome|perinuclear region of cytoplasm|extracellular vesicular exosome|endocytic vesicle lumen|	response to hypoxia|toll-like receptor signaling pathway|protein folding|activation of signaling protein activity involved in unfolded protein response|protein transport|ER-associated ubiquitin-dependent protein catabolic process|endoplasmic reticulum unfolded protein response|actin rod assembly|negative regulation of apoptotic process|negative regulation of apoptotic process|regulation of phosph…	RNA binding|calcium ion binding|protein binding|ATP binding|protein phosphatase binding|virion binding|low-density lipoprotein particle receptor binding|unfolded protein binding|	10	-2.3	30.2	9	-3.2	37.3	-2.6	66.5	9.09e-07	-3.9	-1.7	1	1	0
ENSMUSG00000028868	WASF2	WAS protein family, member 2	ruffle|intracellular|early endosome|cytosol|actin cytoskeleton|lamellipodium|SCAR complex|extracellular vesicular exosome|	angiogenesis|ameboidal cell migration|adenylate cyclase-modulating G-protein coupled receptor signaling pathway|positive regulation of lamellipodium assembly|Rac protein signal transduction|lamellipodium assembly|actin cytoskeleton organization|actin filament-based movement|megakaryocyte development|Fc-gamma receptor signaling pathway involved in phagocytosis|innate immune response|negative regul…	actin binding|protein binding|protein complex binding|protein complex binding|	10	-2.1	38.6	10	-2.1	26.8	-2.1	64.9	9.09e-07	-2.8	-1.5	1	1	0
ENSMUSG00000031154	OTUD5	OTU deubiquitinase 5	cytosol|	proteolysis|negative regulation of type I interferon production|response to lipopolysaccharide|innate immune response|protein K63-linked deubiquitination|protein K48-linked deubiquitination|	ubiquitin-specific protease activity|	10	-1.7	26.6	10	-1.9	34.6	-1.8	60.7	9.09e-07	-2.6	-1.3	1	1	0
ENSMUSG00000033940	BRK1	BRICK1, SCAR/WAVE actin-nucleating complex subunit	cytosol|cytoskeleton|lamellipodium|SCAR complex|extracellular vesicular exosome|	in utero embryonic development|positive regulation of cell proliferation|positive regulation of lamellipodium assembly|Rac protein signal transduction|actin cytoskeleton organization|Fc-gamma receptor signaling pathway involved in phagocytosis|innate immune response|cell motility|protein homotrimerization|positive regulation of Arp2/3 complex-mediated actin nucleation|	protein complex binding|Rac GTPase binding|	10	-2.2	49.6	10	-1.5	10.4	-2	58.2	9.09e-07	-2.9	-1.4	1	1	0
ENSMUSG00000063234	GPR84	G protein-coupled receptor 84	plasma membrane|integral component of membrane|receptor complex|	G-protein coupled receptor signaling pathway|biological_process|	G-protein coupled receptor activity|	10	-1.5	20.4	10	-2.5	39.9	-1.9	57.9	9.09e-07	-2.9	-1.3	1	1	0
ENSMUSG00000030786	ITGAM	integrin, alpha M (complement component 3 receptor 3 subunit)	nucleus|plasma membrane|integrin complex|external side of plasma membrane|cell surface|extracellular vesicular exosome|	toll-like receptor signaling pathway|cell adhesion|leukocyte cell-cell adhesion|integrin-mediated signaling pathway|blood coagulation|microglia development|extracellular matrix organization|neutrophil chemotaxis|toll-like receptor 4 signaling pathway|innate immune response|cellular extravasation|activated T cell proliferation|leukocyte migration|	opsonin binding|glycoprotein binding|protein binding|heparin binding|heparan sulfate proteoglycan binding|metal ion binding|protein heterodimerization activity|	10	-1.8	29.6	10	-1.8	23	-1.8	52.2	9.09e-07	-2.5	-1.3	1	1	0
ENSMUSG00000020166	CNOT2	CCR4-NOT transcription complex, subunit 2	nucleus|cytoplasm|cytosol|membrane|CCR4-NOT complex|	negative regulation of transcription from RNA polymerase II promoter|nuclear-transcribed mRNA catabolic process, deadenylation-dependent decay|nuclear-transcribed mRNA poly(A) tail shortening|trophectodermal cell differentiation|regulation of transcription from RNA polymerase II promoter|transcription from RNA polymerase II promoter|regulation of translation|gene expression|positive regulation of…	RNA polymerase II transcription cofactor activity|RNA polymerase II transcription corepressor binding|poly(A)-specific ribonuclease activity|protein binding|	9	0.2	0.172	10	-2.7	45.4	-2.7	42.4	9.09e-07	-5	-1.7	1	1	0
ENSMUSG00000079426	ARPC4	actin related protein 2/3 complex, subunit 4, 20kDa	cytosol|Arp2/3 protein complex|cell projection|extracellular vesicular exosome|	actin filament polymerization|Arp2/3 complex-mediated actin nucleation|Fc-gamma receptor signaling pathway involved in phagocytosis|actin nucleation|innate immune response|	protein binding|enzyme binding|protein binding, bridging|actin filament binding|	10	-2	20.8	10	-1.9	21.1	-1.9	41.4	1.82e-06	-2.9	-1.2	1	1	0
ENSMUSG00000038503	MESDC2	mesoderm development candidate 2	cellular_component|endoplasmic reticulum|plasma membrane|	protein folding|mesoderm development|Wnt signaling pathway|protein localization to cell surface|	molecular_function|low-density lipoprotein particle receptor binding|	10	-2.1	26.8	10	-1.9	11.5	-2	37.8	2.73e-06	-3.1	-1.3	1	1	0
ENSMUSG00000040204	2810417H13RIK	RIKEN cDNA 2810417H13 gene	nucleus|cytoplasm|perinuclear region of cytoplasm|	DNA replication|DNA repair|cellular response to DNA damage stimulus|response to UV|translesion synthesis|centrosome organization|regulation of cell cycle|	chromatin binding|	10	2.2	20.6	9	2.8	15.6	2.4	35.4	2.73e-06	1.7	3.4	1	1	0
ENSMUSG00000028057	RIT1	Ras-like without CAAX 1	plasma membrane|	GTP catabolic process|signal transduction|small GTPase mediated signal transduction|Ras protein signal transduction|neurotrophin TRK receptor signaling pathway|	protein binding|calmodulin binding|GTP binding|	8	1.5	10.2	8	2.7	28	2.6	34.7	2.73e-06	1.7	3.6	1	1	0
ENSMUSG00000019173	RAB5C	RAB5C, member RAS oncogene family	lysosomal membrane|lipid particle|plasma membrane|endocytic vesicle|early endosome membrane|melanosome|intracellular membrane-bounded organelle|extracellular vesicular exosome|	GTP catabolic process|endosome organization|small GTPase mediated signal transduction|protein transport|regulation of endocytosis|	GTPase activity|GTP binding|GDP binding|	10	-2	30.9	10	-1.1	4.95	-1.7	33.7	4.55e-06	-2.8	-1.1	1	1	0
ENSMUSG00000029622	ARPC1B	actin related protein 2/3 complex, subunit 1B, 41kDa	cytoplasm|Arp2/3 protein complex|actin cytoskeleton|extracellular vesicular exosome|	cellular component movement|regulation of actin filament polymerization|	actin binding|structural constituent of cytoskeleton|	10	-2.5	33.8	9	-0.5	0.942	-1.7	32.1	5.45e-06	-4.3	-1	1	1	0
ENSMUSG00000026644	ACBD7	acyl-CoA binding domain containing 7	None	None	fatty-acyl-CoA binding|lipid binding|	9	2.3	21.2	9	3	11.6	2.6	31.7	6.36e-06	1.6	3.9	1	1	0
ENSMUSG00000037487	UBR5	ubiquitin protein ligase E3 component n-recognin 5	nucleus|cytoplasm|cytoplasm|membrane|	protein polyubiquitination|DNA repair|ubiquitin-dependent protein catabolic process|cellular response to DNA damage stimulus|cellular response to DNA damage stimulus|cell proliferation|positive regulation of protein import into nucleus, translocation|positive regulation of catenin import into nucleus|protein ubiquitination involved in ubiquitin-dependent protein catabolic process|progesterone rec…	RNA binding|ubiquitin-protein transferase activity|protein binding|zinc ion binding|ligase activity|ubiquitin-ubiquitin ligase activity|ubiquitin binding|	10	-1.7	14.7	10	-2	17	-1.9	31.1	6.36e-06	-2.9	-1.2	1	1	0
ENSMUSG00000027170	EIF3M	eukaryotic translation initiation factor 3, subunit M	eukaryotic translation initiation factor 3 complex|eukaryotic 43S preinitiation complex|eukaryotic 48S preinitiation complex|	formation of translation preinitiation complex|cytoplasmic translational initiation|translational initiation|regulation of translational initiation|	translation initiation factor activity|protein binding|	7	1.7	13.9	5	3.3	19	2.4	30.9	6.36e-06	1.5	4.2	1	1	0
ENSMUSG00000030435	U2AF2	U2 small nuclear RNA auxiliary factor 2	nucleus|nucleoplasm|spliceosomal complex|nuclear speck|	mRNA splicing, via spliceosome|mRNA splicing, via spliceosome|transcription from RNA polymerase II promoter|termination of RNA polymerase II transcription|mRNA processing|mRNA export from nucleus|RNA splicing|gene expression|mRNA 3'-end processing|negative regulation of mRNA splicing, via spliceosome|	nucleotide binding|protein binding|enzyme binding|poly(A) RNA binding|C2H2 zinc finger domain binding|	8	1.8	9.98	10	1.9	21	1.8	30.6	6.36e-06	1.2	2.8	1	1	0
ENSMUSG00000033623	PCGF3	polycomb group ring finger 3	nucleus|PcG protein complex|	transcription, DNA-templated|regulation of transcription, DNA-templated|	protein binding|zinc ion binding|	9	2.2	9.37	10	2.1	21.6	2.1	30.5	6.36e-06	1.5	3.1	1	1	0
ENSMUSG00000005683	CS	citrate synthase	nucleus|mitochondrion|mitochondrial matrix|mitochondrial matrix|extracellular vesicular exosome|	carbohydrate metabolic process|tricarboxylic acid cycle|tricarboxylic acid cycle|cellular metabolic process|cellular carbohydrate metabolic process|small molecule metabolic process|	citrate (Si)-synthase activity|citrate (Si)-synthase activity|poly(A) RNA binding|	6	2.3	6.58	8	3	22.6	2.7	28.3	1.27e-05	1.7	4.4	1	1	0
ENSMUSG00000022771	PPIL2	peptidylprolyl isomerase (cyclophilin)-like 2	ubiquitin ligase complex|nucleus|nucleus|Golgi lumen|	protein polyubiquitination|protein peptidyl-prolyl isomerization|protein folding|blood coagulation|leukocyte migration|	peptidyl-prolyl cis-trans isomerase activity|ubiquitin-protein transferase activity|protein binding|ubiquitin-ubiquitin ligase activity|	5	2.5	17	8	2.8	11.3	2.6	27.7	1.55e-05	1.5	4.2	1	1	0
ENSMUSG00000030058	COPG1	coatomer protein complex, subunit gamma 1	Golgi membrane|cytosol|COPI vesicle coat|	intracellular protein transport|retrograde vesicle-mediated transport, Golgi to ER|COPI coating of Golgi vesicle|establishment of Golgi localization|membrane organization|organelle transport along microtubule|	structural molecule activity|protein binding|	7	2	10.8	9	1.8	17.3	1.8	27.6	1.55e-05	1.3	3	1	1	0
ENSMUSG00000036371	SERBP1	SERPINE1 mRNA binding protein 1	nucleus|cytoplasm|plasma membrane|membrane|perinuclear region of cytoplasm|extracellular vesicular exosome|	regulation of apoptotic process|regulation of mRNA stability|	mRNA 3'-UTR binding|protein binding|poly(A) RNA binding|	8	1.9	14.7	8	2.5	13.4	1.9	27.5	1.64e-05	1.2	3.3	1	1	0
ENSMUSG00000006200	RHOX6	reproductive homeobox 6	cellular_component|nucleus|	biological_process|	DNA binding|	10	2.8	23.8	9	2.4	4.1	2.8	27.5	1.64e-05	2	4.2	1	1	0
ENSMUSG00000038301	SNX10	sorting nexin 10	nucleus|endoplasmic reticulum|centrosome|extrinsic component of endosome membrane|	intracellular protein transport|endosome organization|osteoclast differentiation|cilium assembly|protein localization to cilium|protein localization to centrosome|	1-phosphatidylinositol binding|ATPase binding|	10	1.7	6.2	8	3	22.5	2.8	27	1.91e-05	1.8	4.4	1	1	0
ENSMUSG00000036513	COMMD2	COMM domain containing 2	None	None	protein binding|	10	-2.7	22.4	10	-1.2	5.52	-1.5	26.8	2e-05	-3.7	-0.8	1	1	0
ENSMUSG00000058704	MEMO1	mediator of cell motility 1	nucleus|cytosol|	regulation of microtubule-based process|	protein binding|	10	0	0	10	-5.1	30.4	-5.1	26.8	2e-05	-9.6	-3.5	1	1	0
ENSMUSG00000020152	ACTR2	ARP2 actin-related protein 2 homolog (yeast)	cytosol|Arp2/3 protein complex|Arp2/3 protein complex|actin cytoskeleton|membrane|actin cap|cell projection|extracellular vesicular exosome|	cellular component movement|establishment or maintenance of cell polarity|asymmetric cell division|cytoplasmic transport|actin cytoskeleton organization|meiotic cytokinesis|Fc-gamma receptor signaling pathway involved in phagocytosis|innate immune response|spindle localization|	actin binding|ATP binding|	9	-1.9	21.3	6	-1.7	4.38	-1.9	25.3	3.18e-05	-3.1	-1.1	1	1	0
ENSMUSG00000034297	MED13	mediator complex subunit 13	nucleus|nucleoplasm|membrane|mediator complex|	transcription initiation from RNA polymerase II promoter|transcription initiation from RNA polymerase II promoter|gene expression|intracellular steroid hormone receptor signaling pathway|androgen receptor signaling pathway|positive regulation of transcription, DNA-templated|positive regulation of transcription from RNA polymerase II promoter|	RNA polymerase II transcription cofactor activity|transcription cofactor activity|transcription coactivator activity|receptor activity|ligand-dependent nuclear receptor transcription coactivator activity|vitamin D receptor binding|thyroid hormone receptor binding|	9	1.8	9.22	9	2.8	18.5	2.4	25.3	3.18e-05	1.4	3.6	1	1	0
ENSMUSG00000053754	CHD8	chromodomain helicase DNA binding protein 8	nucleus|protein complex|MLL1 complex|	in utero embryonic development|ATP catabolic process|transcription, DNA-templated|negative regulation of Wnt signaling pathway|DNA duplex unwinding|ATP-dependent chromatin remodeling|negative regulation of transcription, DNA-templated|positive regulation of transcription, DNA-templated|positive regulation of transcription from RNA polymerase II promoter|positive regulation of transcription from R…	p53 binding|DNA binding|DNA helicase activity|protein binding|ATP binding|beta-catenin binding|DNA-dependent ATPase activity|methylated histone binding|histone binding|armadillo repeat domain binding|	8	1.9	16.5	5	1.8	9.22	1.9	25.3	3.18e-05	1.3	3	1	1	0
ENSMUSG00000098374	RNF8	ring finger protein 8, E3 ubiquitin protein ligase	ubiquitin ligase complex|chromosome, telomeric region|nucleus|nucleolus|midbody|site of double-strand break|	double-strand break repair|double-strand break repair via nonhomologous end joining|ubiquitin-dependent protein catabolic process|cellular response to DNA damage stimulus|mitotic nuclear division|spermatid development|response to ionizing radiation|histone H2A ubiquitination|histone H2B ubiquitination|interstrand cross-link repair|histone exchange|isotype switching|positive regulation of DNA repa…	chromatin binding|ubiquitin-protein transferase activity|protein binding|zinc ion binding|acid-amino acid ligase activity|ubiquitin protein ligase binding|histone binding|protein homodimerization activity|	8	2	12.1	7	2.2	12.8	2.1	24.4	4.45e-05	1.5	3.8	1	1	0
ENSMUSG00000027993	TRIM2	tripartite motif containing 2	cytoplasm|	cell death|protein ubiquitination|regulation of neuron apoptotic process|	ubiquitin-protein transferase activity|protein binding|zinc ion binding|ligase activity|	9	2.8	14.5	10	2.4	10.2	2.6	24.2	4.91e-05	1.6	3.9	1	1	0
ENSMUSG00000021377	DEK	DEK proto-oncogene	nucleus|	regulation of transcription from RNA polymerase II promoter|transcription from RNA polymerase II promoter|signal transduction|chromatin modification|viral genome replication|regulation of double-strand break repair|regulation of double-strand break repair via nonhomologous end joining|	DNA binding|histone binding|poly(A) RNA binding|	10	-0.7	0.621	10	-2.9	26.3	-1.7	24.1	5.36e-05	-5	-0.7	1	1	0
ENSMUSG00000053436	MAPK14	mitogen-activated protein kinase 14	spindle pole|nucleus|nucleoplasm|cytoplasm|mitochondrion|cytosol|extracellular vesicular exosome|	DNA damage checkpoint|activation of MAPK activity|cell morphogenesis|cartilage condensation|angiogenesis|chondrocyte differentiation|toll-like receptor signaling pathway|MyD88-dependent toll-like receptor signaling pathway|MyD88-independent toll-like receptor signaling pathway|glucose metabolic process|transcription, DNA-templated|regulation of transcription from RNA polymerase II promoter|apopto…	protein serine/threonine kinase activity|MAP kinase activity|MAP kinase kinase activity|protein binding|ATP binding|NFAT protein binding|	10	-1.4	6.93	10	-1.6	17.4	-1.5	23.9	5.55e-05	-2.6	-0.9	1	1	0
ENSMUSG00000058835	ABI1	abl-interactor 1	intracellular|nucleus|endoplasmic reticulum|cytosol|postsynaptic density|lamellipodium|cell junction|filopodium|growth cone|SCAR complex|postsynaptic membrane|extracellular vesicular exosome|	somitogenesis|cellular component movement|transmembrane receptor protein tyrosine kinase signaling pathway|actin polymerization or depolymerization|negative regulation of cell proliferation|peptidyl-tyrosine phosphorylation|megakaryocyte development|Fc-gamma receptor signaling pathway involved in phagocytosis|innate immune response|positive regulation of protein tyrosine kinase activity|lamellipo…	protein binding|cytoskeletal protein binding|protein tyrosine kinase activator activity|protein complex binding|	8	3.7	5.25	9	-3.4	25.4	-3.2	23.4	6.91e-05	-6.1	-1.1	1	1	0
ENSMUSG00000040472	RABGGTA	Rab geranylgeranyltransferase, alpha subunit	Rab-protein geranylgeranyltransferase complex|	cellular protein modification process|visual perception|protein geranylgeranylation|	Rab geranylgeranyltransferase activity|zinc ion binding|Rab GTPase binding|	7	1.4	4.24	6	-2.9	25.7	-2.9	22.9	9.18e-05	-5.7	-1.1	1	0	0
ENSMUSG00000030619	EED	embryonic ectoderm development	sex chromatin|nucleus|nucleus|nucleoplasm|cytoplasm|ESC/E(Z) complex|pronucleus|	regulation of gene expression by genetic imprinting|transcription, DNA-templated|histone methylation|negative regulation of transcription, DNA-templated|positive regulation of histone H3-K27 methylation|	chromatin binding|protein binding|histone methyltransferase activity|identical protein binding|	10	-0.7	4.87	10	-3.8	24.8	-3.5	22.6	0.000104	-6.8	-1.3	1	0	0
ENSMUSG00000056216	CEBPG	CCAAT/enhancer binding protein (C/EBP), gamma	nucleus|nucleus|	liver development|transcription, DNA-templated|regulation of transcription from RNA polymerase II promoter|immune response|mRNA metabolic process|B cell differentiation|natural killer cell mediated cytotoxicity|enucleate erythrocyte differentiation|positive regulation of DNA binding|negative regulation of sequence-specific DNA binding transcription factor activity|positive regulation of interfero…	DNA binding|double-stranded DNA binding|sequence-specific DNA binding transcription factor activity|protein binding|transcription factor binding|sequence-specific DNA binding|protein heterodimerization activity|	9	2.1	16.4	8	1.6	7.22	1.9	22.6	0.000104	1.2	3.4	1	0	0
ENSMUSG00000048865	ARHGAP30	Rho GTPase activating protein 30	cytosol|cytoplasmic membrane-bounded vesicle|intracellular membrane-bounded organelle|	small GTPase mediated signal transduction|positive regulation of GTPase activity|regulation of small GTPase mediated signal transduction|	GTPase activator activity|	9	-2.1	12.4	8	-2	10.6	-2	22.6	0.000104	-3.5	-1.1	1	0	0
ENSMUSG00000090213	TMEM189	transmembrane protein 189	endoplasmic reticulum membrane|integral component of membrane|	None	None	10	-1.9	19.6	10	-1.2	3.87	-1.7	22.4	0.000115	-2.8	-0.9	1	0	0
ENSMUSG00000070733	FRYL	FRY-like	None	transcription, DNA-templated|regulation of transcription, DNA-templated|	None	10	-1.5	6.63	10	-1.6	16	-1.6	22.2	0.000129	-2.6	-1	1	0	0
ENSMUSG00000000902	SMARCB1	SWI/SNF related, matrix associated, actin dependent regulator of chromatin, subfamily b, member 1	nuclear chromatin|XY body|nucleus|nucleoplasm|nucleolus|SWI/SNF complex|protein complex|npBAF complex|nBAF complex|	blastocyst hatching|DNA repair|nucleosome disassembly|chromatin remodeling|transcription, DNA-templated|regulation of transcription from RNA polymerase II promoter|nervous system development|negative regulation of cell proliferation|DNA integration|cell differentiation|single stranded viral RNA replication via double stranded DNA intermediate|ATP-dependent chromatin remodeling|ATP-dependent chrom…	RNA polymerase II core promoter proximal region sequence-specific DNA binding|RNA polymerase II distal enhancer sequence-specific DNA binding|p53 binding|transcription coactivator activity|transcription coactivator activity|protein binding|Tat protein binding|nucleosomal DNA binding|	8	2.3	8.81	10	-3.2	25	-3.1	22.1	0.000138	-6.4	-1.1	1	0	0
ENSMUSG00000033540	IDUA	iduronidase, alpha-L-	coated vesicle|lysosomal lumen|extracellular vesicular exosome|	cell morphogenesis|carbohydrate metabolic process|disaccharide metabolic process|glycosaminoglycan catabolic process|lysosome organization|glycosaminoglycan metabolic process|chondroitin sulfate metabolic process|chondroitin sulfate catabolic process|dermatan sulfate catabolic process|limb morphogenesis|small molecule metabolic process|skeletal system morphogenesis|chemical homeostasis|	L-iduronidase activity|receptor binding|	10	2.1	15.1	10	1.5	8.07	1.9	22	0.000145	1.1	2.8	1	0	0
ENSMUSG00000036693	NOP14	NOP14 nucleolar protein	nucleus|nucleolus|nucleolus|mitochondrion|membrane|90S preribosome|Noc4p-Nop14p complex|small-subunit processome|	endonucleolytic cleavage in ITS1 to separate SSU-rRNA from 5.8S rRNA and LSU-rRNA from tricistronic rRNA transcript (SSU-rRNA, 5.8S rRNA, LSU-rRNA)|maturation of SSU-rRNA from tricistronic rRNA transcript (SSU-rRNA, 5.8S rRNA, LSU-rRNA)|endonucleolytic cleavage to generate mature 5'-end of SSU-rRNA from (SSU-rRNA, 5.8S rRNA, LSU-rRNA)|endonucleolytic cleavage in 5'-ETS of tricistronic rRNA transc…	enzyme binding|snoRNA binding|poly(A) RNA binding|	5	1.5	3.92	9	2	18.7	2	21.7	0.000169	1.1	3.3	1	0	0
ENSMUSG00000010755	CARS	cysteinyl-tRNA synthetase	cytoplasm|cytoplasm|cytosol|cytosol|	tRNA aminoacylation for protein translation|cysteinyl-tRNA aminoacylation|gene expression|	tRNA binding|tRNA binding|tRNA binding|cysteine-tRNA ligase activity|cysteine-tRNA ligase activity|protein binding|ATP binding|protein homodimerization activity|protein homodimerization activity|metal ion binding|	5	1.6	7.57	5	2.8	16.3	2.6	21.6	0.000178	1.3	4.4	1	0	0
ENSMUSG00000028140	MRPL9	mitochondrial ribosomal protein L9	mitochondrion|mitochondrial ribosome|	translation|	structural constituent of ribosome|poly(A) RNA binding|	9	1.3	5.92	9	2.3	16.6	2.4	21.6	0.000178	1.2	3.5	1	0	0
ENSMUSG00000035569	ANKRD11	ankyrin repeat domain 11	nucleus|cytoplasm|plasma membrane|	in utero embryonic development|tissue homeostasis|multicellular organism growth|odontogenesis of dentin-containing tooth|skeletal system morphogenesis|face morphogenesis|bone development|	None	10	1.1	5.23	10	3.8	19.3	2	21.5	0.000184	0.8	4.9	1	0	0
ENSMUSG00000054611	KDM2A	lysine (K)-specific demethylase 2A	nuclear chromatin|nucleus|nucleoplasm|nucleolus|	transcription, DNA-templated|regulation of transcription, DNA-templated|oxidation-reduction process|histone H3-K36 demethylation|	zinc ion binding|unmethylated CpG binding|histone demethylase activity (H3-K36 specific)|	9	3	5.16	7	3.1	16.6	3	21.4	0.000192	1.7	5.1	1	0	0
ENSMUSG00000042520	UBAP2L	ubiquitin associated protein 2-like	Ada2/Gcn5/Ada3 transcription activator complex|	binding of sperm to zona pellucida|	protein binding|poly(A) RNA binding|	10	-1	1.5	10	-3.9	22.8	-3.7	21.3	0.000205	-7.2	-1.5	1	0	0
ENSMUSG00000021359	TFAP2A	transcription factor AP-2 alpha (activating enhancer binding protein 2 alpha)	nucleus|nucleus|cytoplasm|Golgi apparatus|centrosome|intracellular membrane-bounded organelle|	negative regulation of transcription from RNA polymerase II promoter|kidney development|outflow tract morphogenesis|keratinocyte development|optic vesicle morphogenesis|optic cup structural organization|transcription from RNA polymerase II promoter|sensory perception of sound|negative regulation of cell proliferation|embryonic pattern specification|embryonic body morphogenesis|positive regulation…	transcription regulatory region sequence-specific DNA binding|RNA polymerase II core promoter proximal region sequence-specific DNA binding|RNA polymerase II core promoter sequence-specific DNA binding|RNA polymerase II distal enhancer sequence-specific DNA binding|sequence-specific DNA binding RNA polymerase II transcription factor activity|RNA polymerase II core promoter proximal region sequenc…	10	0	0	10	-3.5	23.6	-3.3	21.3	0.000205	-6.4	-1.2	1	0	0
ENSMUSG00000093808	OLFR490	olfactory receptor 490	plasma membrane|membrane|integral component of membrane|	signal transduction|G-protein coupled receptor signaling pathway|sensory perception of smell|response to stimulus|detection of chemical stimulus involved in sensory perception of smell|	signal transducer activity|G-protein coupled receptor activity|olfactory receptor activity|	10	2	15.2	10	2.5	6.77	2.1	21.3	0.000205	1.3	3.3	1	0	0
ENSMUSG00000028678	KIF2C	kinesin family member 2C	chromosome, centromeric region|kinetochore|condensed chromosome kinetochore|nucleus|cytosol|kinesin complex|cytoplasmic microtubule|microtubule cytoskeleton|membrane|microtubule plus-end|	mitotic cell cycle|microtubule-based movement|microtubule depolymerization|microtubule depolymerization|chromosome segregation|mitotic nuclear division|blood coagulation|metabolic process|metabolic process|cell proliferation|antigen processing and presentation of exogenous peptide antigen via MHC class II|establishment or maintenance of microtubule cytoskeleton polarity|regulation of chromosome s…	microtubule motor activity|protein binding|ATP binding|centromeric DNA binding|microtubule plus-end binding|	10	1.7	1.39	10	3	22	2.9	21.3	0.000205	1.6	4.8	1	0	0
ENSMUSG00000015748	PRPF3	pre-mRNA processing factor 3	nucleus|spliceosomal complex|cytoplasm|Cajal body|nuclear speck|U4/U6 x U5 tri-snRNP complex|	RNA splicing, via transesterification reactions|mRNA splicing, via spliceosome|mRNA processing|RNA splicing|	protein binding|identical protein binding|poly(A) RNA binding|	9	2.7	14.9	6	1.9	7.54	2.4	21.2	0.000217	1.4	3.8	1	0	0
ENSMUSG00000000168	DLAT	dihydrolipoamide S-acetyltransferase	mitochondrion|mitochondrial matrix|mitochondrial pyruvate dehydrogenase complex|	glucose metabolic process|pyruvate metabolic process|tricarboxylic acid cycle|regulation of acetyl-CoA biosynthetic process from pyruvate|cellular metabolic process|small molecule metabolic process|	dihydrolipoyllysine-residue acetyltransferase activity|protein binding|	9	2.1	15	8	3.4	8.01	2.1	21.2	0.000217	1.2	4	1	0	0
ENSMUSG00000036315	ZNRD1	zinc ribbon domain containing 1	DNA-directed RNA polymerase I complex|	nucleobase-containing compound metabolic process|termination of RNA polymerase I transcription|	RNA polymerase I activity|nucleic acid binding|zinc ion binding|	8	2	14.2	8	2.1	7.47	2.1	21.2	0.000217	1.1	3.2	1	0	0
ENSMUSG00000039901	9130011E15RIK	RIKEN cDNA 9130011E15 gene	cellular_component|membrane|integral component of membrane|	biological_process|	molecular_function|	10	-2	19.3	9	-1.3	2.8	-1.9	21	0.000235	-3.1	-1	1	0	0
ENSMUSG00000039910	CITED2	Cbp/p300-interacting transactivator, with Glu/Asp-rich carboxy-terminal domain, 2	nuclear chromatin|nucleus|nucleus|cytoplasm|	negative regulation of transcription from RNA polymerase II promoter|vasculogenesis|response to hypoxia|response to hypoxia|trophectodermal cell differentiation|neural tube closure|liver development|embryonic placenta development|heart looping|lens morphogenesis in camera-type eye|hematopoietic progenitor cell differentiation|outflow tract morphogenesis|regulation of organ formation|endocardial c…	RNA polymerase II activating transcription factor binding|RNA polymerase II transcription coactivator activity|RNA polymerase II transcription corepressor activity|chromatin binding|sequence-specific DNA binding transcription factor activity|transcription coactivator activity|transcription corepressor activity|transcription corepressor activity|protein binding|histone acetyltransferase binding|SM…	10	2.3	10.2	10	-2.6	24.4	-2.5	21	0.000235	-5.5	-1	1	0	0
ENSMUSG00000030272	CAMK1	calcium/calmodulin-dependent protein kinase I	nucleus|cytoplasm|	protein phosphorylation|nucleocytoplasmic transport|cell cycle|signal transduction|positive regulation of neuron projection development|regulation of protein localization|regulation of protein binding|positive regulation of protein export from nucleus|regulation of muscle cell differentiation|positive regulation of muscle cell differentiation|positive regulation of synapse structural plasticity|p…	calmodulin-dependent protein kinase activity|protein binding|calmodulin binding|ATP binding|	10	2	10.3	9	2.5	11.4	2.3	20.9	0.000252	1.2	3.5	1	0	0
ENSMUSG00000042709	ATPAF2	ATP synthase mitochondrial F1 complex assembly factor 2	mitochondrion|nuclear speck|	proton-transporting ATP synthase complex assembly|	protein binding|	7	1.9	12.2	9	2.5	9.27	1.9	20.8	0.000269	1.1	3.5	1	0	0
ENSMUSG00000040767	SNRNP25	small nuclear ribonucleoprotein 25kDa (U11/U12)	nucleus|U12-type spliceosomal complex|cytoplasm|intercellular bridge|	mRNA processing|RNA splicing|	None	6	1.9	6.06	7	2.1	15.2	2	20.7	0.000284	1.1	3.5	1	0	0
ENSMUSG00000089739	GM20431	N/A	None	None	None	10	-1.9	18.9	10	-1.3	2.66	-1.7	20.7	0.000284	-2.9	-0.9	1	0	0
ENSMUSG00000030256	BHLHE41	basic helix-loop-helix family, member e41	nucleus|	negative regulation of transcription from RNA polymerase II promoter|transcription from RNA polymerase II promoter|cell proliferation|organ morphogenesis|negative regulation of myotube differentiation|negative regulation of transcription by competitive promoter binding|cell differentiation|circadian regulation of gene expression|negative regulation of transcription, DNA-templated|	RNA polymerase II core promoter proximal region sequence-specific DNA binding|RNA polymerase II core promoter proximal region sequence-specific DNA binding transcription factor activity involved in negative regulation of transcription|RNA polymerase II activating transcription factor binding|RNA polymerase II transcription factor binding transcription factor activity involved in negative regulati…	9	1	1.85	10	-3.3	23	-3.2	20.7	0.000284	-6.4	-1	1	0	0
ENSMUSG00000024897	APBA1	amyloid beta (A4) precursor protein-binding, family A, member 1	nucleus|Golgi apparatus|plasma membrane|synaptic vesicle|protein complex|perinuclear region of cytoplasm|	in utero embryonic development|protein complex assembly|intracellular protein transport|cell adhesion|synaptic transmission|nervous system development|locomotory behavior|axon cargo transport|regulation of gene expression|glutamate secretion|gamma-aminobutyric acid secretion|multicellular organism growth|	beta-amyloid binding|protein binding|phosphatidylinositol-4,5-bisphosphate binding|PDZ domain binding|protein complex binding|	10	1.8	13.1	10	1.2	8.14	1.8	20.7	0.000284	1.1	3.5	1	0	0
ENSMUSG00000020850	PRPF8	pre-mRNA processing factor 8	nucleus|nucleoplasm|U5 snRNP|membrane|nuclear speck|catalytic step 2 spliceosome|	RNA splicing, via transesterification reactions|mRNA splicing, via spliceosome|mRNA splicing, via spliceosome|mRNA processing|RNA splicing|gene expression|	protein binding|U6 snRNA binding|U5 snRNA binding|poly(A) RNA binding|	7	2.1	8.71	6	1.7	12.5	1.8	20.6	0.000298	1.1	3.1	0	0	0
ENSMUSG00000026377	MKI67IP	N/A	None	None	None	7	1.4	8.41	7	2.2	13.9	1.9	20.5	0.000314	1.1	3.2	0	0	0
ENSMUSG00000025809	ITGB1	integrin, beta 1 (fibronectin receptor, beta polypeptide, antigen CD29 includes MDF2, MSK12)	acrosomal vesicle|ruffle|basement membrane|cytoplasm|plasma membrane|plasma membrane|focal adhesion|focal adhesion|integrin complex|external side of plasma membrane|cell surface|intercalated disc|membrane|lamellipodium|hemidesmosome|filopodium|neuromuscular junction|cleavage furrow|ruffle membrane|integrin alpha3-beta1 complex|integrin alpha7-beta1 complex|integrin alpha8-beta1 complex|integrin a…	G1/S transition of mitotic cell cycle|in utero embryonic development|cell fate specification|tissue homeostasis|cell migration involved in sprouting angiogenesis|cellular calcium ion homeostasis|cellular defense response|homophilic cell adhesion|leukocyte cell-cell adhesion|cell-matrix adhesion|calcium-independent cell-matrix adhesion|integrin-mediated signaling pathway|axon guidance|blood coagul…	virus receptor activity|glycoprotein binding|fibronectin binding|protease binding|actin binding|integrin binding|protein binding|collagen binding|protein kinase binding|protein domain specific binding|peptide binding|laminin binding|metal ion binding|protein heterodimerization activity|cell adhesion molecule binding|alpha-actinin binding|	9	1.7	2.43	10	-3.1	21.1	-2.8	20.5	0.000314	-5.6	-0.8	0	0	0
ENSMUSG00000032407	U2SURP	U2 snRNP-associated SURP domain containing	nucleus|	RNA processing|	nucleotide binding|protein binding|poly(A) RNA binding|	8	1.3	7.63	7	1.9	13.7	1.8	20.4	0.000334	1	2.9	0	0	0
ENSMUSG00000038209	ITLN1	intelectin 1 (galactofuranose binding)	anchored component of membrane|brush border membrane|receptor complex|membrane raft|extracellular vesicular exosome|	positive regulation of protein phosphorylation|response to nematode|positive regulation of glucose import|	None	7	1.8	6.52	7	1.9	14.2	1.9	20.3	0.000355	1.1	3.2	0	0	0
ENSMUSG00000062960	KDR	kinase insert domain receptor (a type III receptor tyrosine kinase)	extracellular region|nucleus|endosome|early endosome|Golgi apparatus|plasma membrane|plasma membrane|plasma membrane|integral component of plasma membrane|external side of plasma membrane|cytoplasmic membrane-bounded vesicle|cell junction|membrane raft|sorting endosome|	angiogenesis|ovarian follicle development|vasculogenesis|positive regulation of protein phosphorylation|positive regulation of endothelial cell proliferation|lymph vessel development|cell migration involved in sprouting angiogenesis|positive regulation of mesenchymal cell proliferation|endothelium development|transmembrane receptor protein tyrosine kinase signaling pathway|positive regulation of …	protein tyrosine kinase activity|transmembrane receptor protein tyrosine kinase activity|receptor signaling protein tyrosine kinase activity|vascular endothelial growth factor-activated receptor activity|integrin binding|protein binding|ATP binding|growth factor binding|vascular endothelial growth factor binding|Hsp90 protein binding|	9	2.1	11.4	10	2	9.38	2	20.3	0.000355	1.3	3.2	0	0	0
ENSMUSG00000020899	PFAS	phosphoribosylformylglycinamidine synthase	cytosol|extracellular vesicular exosome|	purine nucleobase metabolic process|'de novo' IMP biosynthetic process|'de novo' IMP biosynthetic process|glutamine metabolic process|purine ribonucleoside monophosphate biosynthetic process|response to drug|small molecule metabolic process|nucleobase-containing small molecule metabolic process|	phosphoribosylformylglycinamidine synthase activity|ATP binding|	6	2.3	8.02	9	2.6	12.8	2.3	20.3	0.000355	1.5	3.9	0	0	0
ENSMUSG00000060981	HIST1H4H	histone cluster 1, H4h	None	None	None	7	1.9	5.67	8	2.3	15.2	2.2	20.2	0.000375	1.3	3.6	0	0	0
ENSMUSG00000090083	RNF8	ring finger protein 8, E3 ubiquitin protein ligase	ubiquitin ligase complex|chromosome, telomeric region|nucleus|nucleolus|midbody|site of double-strand break|	double-strand break repair|double-strand break repair via nonhomologous end joining|ubiquitin-dependent protein catabolic process|cellular response to DNA damage stimulus|mitotic nuclear division|spermatid development|response to ionizing radiation|histone H2A ubiquitination|histone H2B ubiquitination|interstrand cross-link repair|histone exchange|isotype switching|positive regulation of DNA repa…	chromatin binding|ubiquitin-protein transferase activity|protein binding|zinc ion binding|acid-amino acid ligase activity|ubiquitin protein ligase binding|histone binding|protein homodimerization activity|	8	2.7	8.95	8	2.2	11.8	2.1	20.2	0.000375	1.4	3.9	0	0	0
ENSMUSG00000079435	RPL36A	ribosomal protein L36a	cytosol|ribosome|cytosolic large ribosomal subunit|	nuclear-transcribed mRNA catabolic process, nonsense-mediated decay|translation|translation|translational initiation|translational elongation|translational termination|SRP-dependent cotranslational protein targeting to membrane|gene expression|viral process|RNA metabolic process|mRNA metabolic process|viral life cycle|viral transcription|cellular protein metabolic process|	structural constituent of ribosome|poly(A) RNA binding|	5	2.1	11.7	4	1.8	8.81	2	20.1	0.000393	1.3	3.5	0	0	0
ENSMUSG00000062867	IMPDH2	IMP (inosine 5'-monophosphate) dehydrogenase 2	nucleus|cytoplasm|peroxisomal membrane|cytosol|membrane|extracellular vesicular exosome|	purine nucleobase metabolic process|GMP biosynthetic process|purine ribonucleoside monophosphate biosynthetic process|small molecule metabolic process|nucleobase-containing small molecule metabolic process|oxidation-reduction process|	nucleotide binding|DNA binding|RNA binding|IMP dehydrogenase activity|adenyl nucleotide binding|metal ion binding|	5	0.9	1.2	6	2.6	20.9	2.5	20	0.000414	1.4	4.3	0	0	0
ENSMUSG00000025130	P4HB	prolyl 4-hydroxylase, beta polypeptide	extracellular region|endoplasmic reticulum|endoplasmic reticulum lumen|endoplasmic reticulum-Golgi intermediate compartment|plasma membrane|procollagen-proline 4-dioxygenase complex|melanosome|extracellular vesicular exosome|	protein folding|peptidyl-proline hydroxylation to 4-hydroxy-L-proline|extracellular matrix organization|response to endoplasmic reticulum stress|lipoprotein metabolic process|small molecule metabolic process|cell redox homeostasis|cellular response to hypoxia|regulation of oxidative stress-induced intrinsic apoptotic signaling pathway|	protein disulfide isomerase activity|procollagen-proline 4-dioxygenase activity|protein binding|poly(A) RNA binding|protein heterodimerization activity|	10	1.4	7.08	8	3.2	15.4	1.9	20	0.000414	1.1	4	0	0	0
ENSMUSG00000027610	GSS	glutathione synthetase	cytosol|extracellular vesicular exosome|	cellular amino acid metabolic process|glutathione biosynthetic process|glutathione biosynthetic process|xenobiotic metabolic process|response to oxidative stress|nervous system development|aging|response to nutrient levels|response to tumor necrosis factor|response to amino acid|small molecule metabolic process|response to cadmium ion|glutathione derivative biosynthetic process|	magnesium ion binding|glutathione synthase activity|ATP binding|glycine binding|protein homodimerization activity|glutathione binding|	10	1.7	9.89	10	2.6	10.5	1.8	19.9	0.000432	1	3.2	0	0	0
ENSMUSG00000037369	KDM6A	lysine (K)-specific demethylase 6A	nucleus|histone methyltransferase complex|	in utero embryonic development|neural tube closure|respiratory system process|heart development|somite rostral/caudal axis specification|mesodermal cell differentiation|notochord morphogenesis|histone H3-K4 methylation|oxidation-reduction process|canonical Wnt signaling pathway|histone H3-K27 demethylation|	RNA polymerase II core promoter proximal region sequence-specific DNA binding|metal ion binding|dioxygenase activity|histone demethylase activity (H3-K27 specific)|	9	0.6	0.613	8	-2.9	22.4	-2.8	19.9	0.000432	-5.5	-0.6	0	0	0
ENSMUSG00000051495	IRF2BP2	interferon regulatory factor 2 binding protein 2	nucleus|cytoplasm|	transcription, DNA-templated|regulation of transcription, DNA-templated|	metal ion binding|	9	0.9	3.67	10	3	20.5	2.8	19.9	0.000432	1.1	4.3	0	0	0
ENSMUSG00000059534	UQCR10	ubiquinol-cytochrome c reductase, complex III subunit X	mitochondrial inner membrane|mitochondrial respiratory chain complex III|extracellular vesicular exosome|	mitochondrial electron transport, ubiquinol to cytochrome c|respiratory electron transport chain|cellular metabolic process|small molecule metabolic process|hydrogen ion transmembrane transport|	ubiquinol-cytochrome-c reductase activity|	8	1.6	12.9	4	2.5	7.85	2.1	19.8	0.00047	1	3.5	0	0	0
ENSMUSG00000029173	SEPSECS	Sep (O-phosphoserine) tRNA:Sec (selenocysteine) tRNA synthase	nucleus|cytoplasm|	selenocysteine incorporation|selenocysteinyl-tRNA(Sec) biosynthetic process|	tRNA binding|protein binding|transferase activity, transferring selenium-containing groups|pyridoxal phosphate binding|	7	1.3	1.71	8	1.8	18.9	1.6	19.8	0.00047	1.1	3	0	0	0
ENSMUSG00000049299	TRAPPC1	trafficking protein particle complex 1	endoplasmic reticulum|Golgi apparatus|cis-Golgi network|TRAPP complex|	ER to Golgi vesicle-mediated transport|	None	6	2.1	10.3	4	2.8	10.1	2.3	19.7	0.000501	1.5	4.3	0	0	0
ENSMUSG00000038510	RPF2	ribosome production factor 2 homolog (S. cerevisiae)	nucleolus|	None	poly(A) RNA binding|	8	-0.5	0.728	9	2.4	21.7	2.3	19.7	0.000501	1.2	4.1	0	0	0
ENSMUSG00000034349	SMC4	structural maintenance of chromosomes 4	condensin complex|condensin complex|nucleus|nucleus|nucleoplasm|cytoplasm|cytosol|	mitotic sister chromatid segregation|mitotic cell cycle|mitotic chromosome condensation|meiotic chromosome condensation|meiotic chromosome segregation|kinetochore organization|	protein binding|ATP binding|protein heterodimerization activity|	8	1.4	8.42	8	1.7	11.9	1.5	19.7	0.000501	1	2.6	0	0	0
ENSMUSG00000003458	NCSTN	nicastrin	lysosomal membrane|endoplasmic reticulum|endoplasmic reticulum|Golgi apparatus|Golgi apparatus|plasma membrane|integral component of plasma membrane|integral component of plasma membrane|membrane|integral component of membrane|melanosome|extracellular vesicular exosome|	myeloid cell homeostasis|proteolysis|membrane protein ectodomain proteolysis|membrane protein ectodomain proteolysis|Notch signaling pathway|Notch receptor processing|protein processing|protein processing|extracellular matrix disassembly|extracellular matrix organization|membrane protein intracellular domain proteolysis|T cell proliferation|amyloid precursor protein catabolic process|positive reg…	endopeptidase activity|protein binding|	10	0	0	10	-2.8	22.6	-2.7	19.6	0.000529	-5.4	-0.7	0	0	0
ENSMUSG00000027852	NRAS	neuroblastoma RAS viral (v-ras) oncogene homolog	Golgi membrane|plasma membrane|membrane|extracellular vesicular exosome|	MAPK cascade|activation of MAPKK activity|GTP catabolic process|epidermal growth factor receptor signaling pathway|small GTPase mediated signal transduction|Ras protein signal transduction|axon guidance|blood coagulation|positive regulation of cell proliferation|insulin receptor signaling pathway|visual learning|fibroblast growth factor receptor signaling pathway|actin cytoskeleton organization|r…	GTP binding|protein complex binding|	8	0.9	2.58	9	-5.6	22.5	-5.5	19.6	0.000529	-10.7	-4	0	0	0
ENSMUSG00000028086	FBXW7	F-box and WD repeat domain containing 7, E3 ubiquitin protein ligase	nucleus|nucleoplasm|nucleoplasm|nucleolus|endoplasmic reticulum|Golgi apparatus|SCF ubiquitin ligase complex|protein complex|	vasculogenesis|vasculature development|regulation of transcription, DNA-templated|cellular response to DNA damage stimulus|sister chromatid cohesion|Notch signaling pathway|negative regulation of triglyceride biosynthetic process|regulation of lipid storage|viral process|protein ubiquitination|lung development|SCF-dependent proteasomal ubiquitin-dependent protein catabolic process|negative regula…	sequence-specific DNA binding transcription factor activity|protein binding|identical protein binding|	9	-1.8	21	10	-0.5	0.648	-1.8	19.6	0.000529	-3.2	-1	0	0	0
ENSMUSG00000024241	SOS1	son of sevenless homolog 1 (Drosophila)	cytosol|plasma membrane|postsynaptic density|neuronal cell body|	signal transduction|epidermal growth factor receptor signaling pathway|small GTPase mediated signal transduction|Ras protein signal transduction|axon guidance|blood coagulation|insulin receptor signaling pathway|fibroblast growth factor receptor signaling pathway|platelet activation|positive regulation of Ras GTPase activity|positive regulation of Ras GTPase activity|positive regulation of Rho GT…	DNA binding|Ras guanyl-nucleotide exchange factor activity|Ras guanyl-nucleotide exchange factor activity|Rho guanyl-nucleotide exchange factor activity|Rho GTPase activator activity|protein binding|SH3 domain binding|protein heterodimerization activity|	6	2	7.96	6	-2.7	22.3	-2.7	19.6	0.000529	-5	-1.7	0	0	0
ENSMUSG00000000378	CCM2	cerebral cavernous malformation 2	cytoplasm|protein complex|	vasculogenesis|in utero embryonic development|endothelial cell development|integrin-mediated signaling pathway|multicellular organism growth|cell-cell junction organization|inner ear development|venous blood vessel morphogenesis|stress-activated MAPK cascade|pericardium development|blood vessel endothelial cell differentiation|endothelial tube morphogenesis|	protein binding|	9	2.4	6.67	7	-3.4	22.7	-3.3	19.5	0.000555	-6	-1.7	0	0	0
ENSMUSG00000010554	METTL16	methyltransferase like 16	None	methylation|	methyltransferase activity|poly(A) RNA binding|	6	0	0	9	-3.2	22.1	-3.1	19.5	0.000555	-6	-1.4	0	0	0
ENSMUSG00000028860	SYTL1	synaptotagmin-like 1	plasma membrane|extrinsic component of plasma membrane|melanosome|	intracellular protein transport|exocytosis|	protein binding|Rab GTPase binding|neurexin family protein binding|	10	2.8	10.8	10	2.2	9.32	2.3	19.4	0.000602	1.5	3.9	0	0	0
ENSMUSG00000018189	UCHL5	ubiquitin carboxyl-terminal hydrolase L5	proteasome complex|nucleus|cytosol|Ino80 complex|Ino80 complex|	DNA repair|DNA recombination|transcription, DNA-templated|regulation of transcription, DNA-templated|ubiquitin-dependent protein catabolic process|transforming growth factor beta receptor signaling pathway|negative regulation of endopeptidase activity|protein deubiquitination|lateral ventricle development|negative regulation of transforming growth factor beta receptor signaling pathway|midbrain d…	ubiquitin-specific protease activity|endopeptidase inhibitor activity|protein binding|omega peptidase activity|poly(A) RNA binding|proteasome binding|	10	2	3.95	10	-3.8	22.1	-3.7	19.3	0.000637	-7	-2	0	0	0
ENSMUSG00000022568	SCRIB	scribbled planar cell polarity protein	plasma membrane|plasma membrane|cell-cell junction|cell-cell adherens junction|basolateral plasma membrane|lamellipodium|cell leading edge|Scrib-APC-beta-catenin complex|myelin sheath abaxonal region|presynaptic membrane|postsynaptic membrane|extracellular vesicular exosome|	neural tube closure|positive regulation of receptor recycling|asymmetric protein localization|cell proliferation|viral process|synaptic vesicle targeting|single organismal cell-cell adhesion|cell migration|activation of Rac GTPase activity|establishment of apical/basal cell polarity|wound healing|positive regulation of apoptotic process|astrocyte cell migration|negative regulation of mitotic cell…	protein binding|	10	1.7	14.1	8	2.1	6.04	1.9	19.2	0.000673	1.1	3	0	0	0
ENSMUSG00000038489	POLR2L	polymerase (RNA) II (DNA directed) polypeptide L, 7.6kDa	nucleus|nucleoplasm|DNA-directed RNA polymerase II, core complex|DNA-directed RNA polymerase III complex|DNA-directed RNA polymerase I complex|cytosol|	mRNA splicing, via spliceosome|DNA repair|transcription-coupled nucleotide-excision repair|nucleotide-excision repair|regulation of transcription from RNA polymerase I promoter|transcription from RNA polymerase I promoter|transcription from RNA polymerase II promoter|transcription from RNA polymerase II promoter|transcription initiation from RNA polymerase II promoter|transcription elongation fro…	RNA polymerase I activity|RNA polymerase II activity|RNA polymerase III activity|DNA binding|DNA-directed RNA polymerase activity|zinc ion binding|	7	2.8	6.33	7	2.4	13.7	2.5	19.2	0.000673	1.7	4.2	0	0	0
ENSMUSG00000021993	MIPEP	mitochondrial intermediate peptidase	mitochondrion|mitochondrial matrix|	proteolysis|protein processing involved in protein targeting to mitochondrion|	metalloendopeptidase activity|metal ion binding|	9	1.6	10.1	9	1.8	9.5	1.8	19.1	0.000717	1	2.8	0	0	0
ENSMUSG00000026779	MASTL	microtubule associated serine/threonine kinase-like	nucleus|nucleoplasm|cytoplasm|centrosome|cleavage furrow|	G2/M transition of mitotic cell cycle|mitotic cell cycle|protein phosphorylation|cellular response to DNA damage stimulus|mitotic nuclear division|negative regulation of protein phosphatase type 2A activity|regulation of cell cycle|	protein serine/threonine kinase activity|ATP binding|kinase activity|protein phosphatase 2A binding|	4	2.3	4.62	5	1.9	15	2.2	19.1	0.000717	1.2	3.9	0	0	0
ENSMUSG00000034269	SETD5	SET domain containing 5	None	None	None	10	1.4	12.3	10	1.8	7.66	1.6	19.1	0.000717	0.9	2.5	0	0	0
ENSMUSG00000002104	RAPSN	receptor-associated protein of the synapse	Golgi apparatus|cytoskeleton|cell junction|neuromuscular junction|postsynaptic membrane|	synaptic transmission|synaptic transmission, cholinergic|positive regulation of neuron apoptotic process|	zinc ion binding|acetylcholine receptor binding|ionotropic glutamate receptor binding|	10	2	13.9	9	1.1	6.22	1.8	19.1	0.000717	0.9	2.8	0	0	0
ENSMUSG00000039640	MRPL12	mitochondrial ribosomal protein L12	mitochondrion|mitochondrial large ribosomal subunit|	transcription from mitochondrial promoter|translation|positive regulation of transcription, DNA-templated|	RNA binding|structural constituent of ribosome|protein binding|	8	2	8.79	9	1.7	10.7	1.9	19	0.000761	1	3	0	0	0
ENSMUSG00000041020	MAP7D2	MAP7 domain containing 2	microtubule|	microtubule cytoskeleton organization|	None	9	0.6	0.802	10	2.9	19.9	2.8	18.9	0.000804	1.7	4.8	0	0	0
ENSMUSG00000060743	H3F3A	H3 histone, family 3A	None	None	None	8	2.2	11	7	1.8	8.56	2	18.9	0.000804	1.1	3.3	0	0	0
ENSMUSG00000021374	NUP153	nucleoporin 153kDa	nuclear pore|nucleoplasm|nucleolus|cytoplasm|nuclear membrane|nuclear periphery|nuclear inclusion body|nuclear pore nuclear basket|	mitotic cell cycle|carbohydrate metabolic process|mitotic nuclear envelope disassembly|hexose transport|regulation of glucose transport|protein transport|glucose transport|viral process|cytokine-mediated signaling pathway|small molecule metabolic process|viral entry into host cell|negative regulation of RNA export from nucleus|mRNA transport|nuclear pore complex assembly|transmembrane transport|v…	DNA binding|transporter activity|nucleocytoplasmic transporter activity|protein binding|zinc ion binding|structural constituent of nuclear pore|identical protein binding|protein anchor|	9	2.2	12.1	8	2.1	7.28	2.2	18.9	0.000804	1.2	3.5	0	0	0
ENSMUSG00000028538	ST3GAL3	ST3 beta-galactoside alpha-2,3-sialyltransferase 3	Golgi membrane|extracellular region|integral component of Golgi membrane|Golgi cisterna membrane|	carbohydrate metabolic process|O-glycan processing|keratan sulfate biosynthetic process|glycosaminoglycan metabolic process|keratan sulfate metabolic process|post-translational protein modification|cellular protein metabolic process|small molecule metabolic process|sialylation|sialylation|	beta-galactoside (CMP) alpha-2,3-sialyltransferase activity|N-acetyllactosaminide alpha-2,3-sialyltransferase activity|	9	-0.3	0.158	8	-3	21.4	-2.8	18.8	0.000842	-5.5	-0.6	0	0	0
ENSMUSG00000042446	ZMYM4	zinc finger, MYM-type 4	nucleus|nucleolus|cytoplasm|	cytoskeleton organization|multicellular organismal development|regulation of cell morphogenesis|	DNA binding|zinc ion binding|	10	-0.3	0.243	10	-3.4	21.8	-3.3	18.7	0.000893	-6	-1.5	0	0	0
ENSMUSG00000040385	PPP1CA	protein phosphatase 1, catalytic subunit, alpha isozyme	protein phosphatase type 1 complex|nucleus|nucleolus|cytoplasm|cytosol|glycogen granule|dendritic spine|perikaryon|extracellular vesicular exosome|MLL5-L complex|PTW/PP1 phosphatase complex|	glycogen metabolic process|regulation of glycogen biosynthetic process|regulation of glycogen catabolic process|protein dephosphorylation|protein dephosphorylation|cell cycle|transforming growth factor beta receptor signaling pathway|triglyceride catabolic process|lung development|negative regulation of transforming growth factor beta receptor signaling pathway|circadian regulation of gene expres…	protein serine/threonine phosphatase activity|protein binding|phosphatase activity|ribonucleoprotein complex binding|metal ion binding|	8	2	10.1	8	1.2	9.82	1.7	18.7	0.000893	1	2.9	0	0	0
ENSMUSG00000037259	DZANK1	double zinc ribbon and ankyrin repeat domains 1	None	None	zinc ion binding|	9	2.6	16.7	8	1.7	2.93	2.3	18.7	0.000893	1.4	4	0	0	0
ENSMUSG00000074698	CSNK2A1	casein kinase 2, alpha 1 polypeptide	nucleus|cytosol|plasma membrane|Sin3 complex|NuRD complex|PcG protein complex|	mitotic cell cycle|transcription, DNA-templated|regulation of transcription, DNA-templated|protein phosphorylation|signal transduction|axon guidance|positive regulation of cell proliferation|Wnt signaling pathway|positive regulation of Wnt signaling pathway|positive regulation of cell growth|negative regulation of cysteine-type endopeptidase activity involved in apoptotic process|positive regulat…	protein serine/threonine kinase activity|protein serine/threonine kinase activity|protein binding|ATP binding|protein N-terminus binding|Hsp90 protein binding|	9	2.7	2.46	9	2.6	16.6	2.7	18.7	0.000893	1.3	4.2	0	0	0
ENSMUSG00000018921	PELP1	proline, glutamate and leucine rich protein 1	nucleus|nucleolus|cytoplasm|membrane|MLL1 complex|	transcription, DNA-templated|	protein binding|poly(A) RNA binding|	5	1.6	11.1	6	1.7	7.95	1.7	18.7	0.000893	1	2.9	0	0	0
ENSMUSG00000005371	FBXO11	F-box protein 11	ubiquitin ligase complex|nucleus|chromosome|nucleolus|cytoplasm|	cellular protein modification process|ubiquitin-dependent protein catabolic process|sensory perception of sound|protein ubiquitination|protein ubiquitination|peptidyl-arginine N-methylation|	ubiquitin-protein transferase activity|protein binding|zinc ion binding|protein-arginine N-methyltransferase activity|	9	1.7	6.71	7	-5.1	22.1	-5.1	18.6	0.000948	-10	-4	0	0	0
ENSMUSG00000028882	PPP1R8	protein phosphatase 1, regulatory subunit 8	nucleus|spliceosomal complex|cytoplasm|nuclear speck|	transcription, DNA-templated|regulation of transcription, DNA-templated|mRNA processing|RNA catabolic process|cell proliferation|RNA splicing|negative regulation of catalytic activity|negative regulation of catalytic activity|RNA phosphodiester bond hydrolysis|	DNA binding|RNA binding|endonuclease activity|protein serine/threonine phosphatase inhibitor activity|protein binding|protein phosphatase type 1 regulator activity|ribonuclease E activity|	5	2.2	10.5	4	1.8	8.62	2	18.6	0.000948	1.2	3.8	0	0	0
ENSMUSG00000041949	TANGO6	transport and golgi organization 6 homolog (Drosophila)	integral component of membrane|	None	None	9	1.7	11.8	8	1.7	7.11	1.7	18.6	0.000948	1.1	2.7	0	0	0
ENSMUSG00000045100	SLC25A26	solute carrier family 25 (S-adenosylmethionine carrier), member 26	mitochondrion|mitochondrial inner membrane|integral component of membrane|	S-adenosyl-L-methionine transport|S-adenosyl-L-methionine transmembrane transport|	S-adenosyl-L-methionine transmembrane transporter activity|	9	1.3	5.15	10	-4	21.9	-4	18.5	0.001	-8	-2.5	0	0	0
ENSMUSG00000058145	ADAMTS17	ADAM metallopeptidase with thrombospondin type 1 motif, 17	proteinaceous extracellular matrix|	proteolysis|	metalloendopeptidase activity|zinc ion binding|	10	2.3	15.9	10	1	3.64	2.2	18.5	0.001	1.2	3.5	0	0	0
ENSMUSG00000054422	FABP1	fatty acid binding protein 1, liver	nucleoplasm|peroxisomal matrix|cytosol|apical cortex|extracellular vesicular exosome|	positive regulation of cell proliferation|long-chain fatty acid transport|positive regulation of fatty acid beta-oxidation|negative regulation of apoptotic process|negative regulation of cysteine-type endopeptidase activity involved in apoptotic process|cellular lipid metabolic process|small molecule metabolic process|intestinal absorption|positive regulation of hydrolase activity|cellular respon…	chromatin binding|long-chain fatty acid transporter activity|fatty acid binding|phospholipid binding|drug binding|antioxidant activity|bile acid binding|	9	2.3	16	9	2.1	2.86	2.3	18.5	0.001	1.3	3.7	0	0	0
ENSMUSG00000020149	RAB1	RAB1, member RAS oncogene family	Golgi membrane|intracellular|cell|cytoplasm|endosome|early endosome|endoplasmic reticulum|endoplasmic reticulum membrane|Golgi apparatus|membrane|melanosome|neuronal cell body|extracellular vesicular exosome|	autophagic vacuole assembly|GTP catabolic process|transport|intracellular protein transport|ER to Golgi vesicle-mediated transport|ER to Golgi vesicle-mediated transport|endocytosis|autophagy|small GTPase mediated signal transduction|protein transport|vesicle-mediated transport|cell migration|cell migration|growth hormone secretion|melanosome transport|substrate adhesion-dependent cell spreading|…	nucleotide binding|GTPase activity|protein binding|GTP binding|	10	1.4	7.55	9	-3.4	21.8	-3.4	18.4	0.00105	-6	-1.8	0	0	0
ENSMUSG00000071415	RPL23	ribosomal protein L23	nucleolus|cytoplasm|cytosol|ribosome|membrane|cytosolic large ribosomal subunit|extracellular vesicular exosome|	nuclear-transcribed mRNA catabolic process, nonsense-mediated decay|translation|translation|translational initiation|translational elongation|translational termination|ribosomal protein import into nucleus|SRP-dependent cotranslational protein targeting to membrane|gene expression|viral process|RNA metabolic process|mRNA metabolic process|viral life cycle|viral transcription|cellular protein meta…	structural constituent of ribosome|protein binding|poly(A) RNA binding|	8	2.5	10.1	8	1.2	11.8	1.3	18.4	0.00105	0.8	3	0	0	0
ENSMUSG00000034278	DNAJC17	DnaJ (Hsp40) homolog, subfamily C, member 17	None	None	nucleotide binding|RNA binding|	8	1.6	5.31	8	2.4	13.9	2.1	18.4	0.00105	1.2	3.6	0	0	0
ENSMUSG00000028101	PIAS3	protein inhibitor of activated STAT, 3	nucleus|cytoplasm|dendrite|synapse|	transcription, DNA-templated|regulation of transcription, DNA-templated|response to hormone|positive regulation of gene expression|protein sumoylation|protein sumoylation|positive regulation of protein sumoylation|positive regulation of membrane potential|	nucleic acid binding|protein binding|protein C-terminus binding|zinc ion binding|potassium channel regulator activity|SUMO ligase activity|enzyme binding|protein N-terminus binding|	10	1.8	15.1	9	1	5.37	1.6	18.4	0.00105	0.8	3.7	0	0	0
ENSMUSG00000038876	RNF146	ring finger protein 146	nucleus|cytosol|	Wnt signaling pathway|protein ubiquitination involved in ubiquitin-dependent protein catabolic process|protein autoubiquitination|protein K48-linked ubiquitination|positive regulation of canonical Wnt signaling pathway|	ubiquitin-protein transferase activity|protein binding|zinc ion binding|ligase activity|poly-ADP-D-ribose binding|	10	2	12.1	10	1.4	7.48	1.7	18.3	0.00113	0.8	3.7	0	0	0
ENSMUSG00000024168	TMEM204	transmembrane protein 204	plasma membrane|adherens junction|integral component of membrane|	lymph vessel development|response to stress|regulation of vascular endothelial growth factor receptor signaling pathway|smooth muscle cell differentiation|	None	7	1.8	14.5	7	1.6	4.23	1.8	18.3	0.00113	1.1	3	0	0	0
ENSMUSG00000001891	UGP2	UDP-glucose pyrophosphorylase 2	nucleus|cytosol|extracellular vesicular exosome|	carbohydrate metabolic process|glycogen biosynthetic process|glucose metabolic process|UDP-glucose metabolic process|UDP-glucuronate biosynthetic process|xenobiotic metabolic process|glucose 1-phosphate metabolic process|small molecule metabolic process|cellular glucuronidation|	UTP:glucose-1-phosphate uridylyltransferase activity|UTP:glucose-1-phosphate uridylyltransferase activity|protein binding|glucose binding|pyrimidine ribonucleotide binding|metal ion binding|	9	-1.6	15.9	10	-0.9	3.97	-1.4	18.3	0.00113	-2.4	-0.7	0	0	0
ENSMUSG00000003528	SLC25A1	solute carrier family 25 (mitochondrial carrier; citrate transporter), member 1	nucleus|mitochondrial inner membrane|integral component of membrane|extracellular vesicular exosome|	carbohydrate metabolic process|glucose metabolic process|gluconeogenesis|citrate transport|triglyceride biosynthetic process|long-chain fatty-acyl-CoA biosynthetic process|cellular lipid metabolic process|small molecule metabolic process|transmembrane transport|	citrate transmembrane transporter activity|	9	3.1	7.84	9	2.4	11.3	2.4	18.3	0.00113	1.6	4.4	0	0	0
ENSMUSG00000039703	NPLOC4	nuclear protein localization 4 homolog (S. cerevisiae)	nucleus|endoplasmic reticulum|cytosol|nuclear outer membrane-endoplasmic reticulum membrane network|	Golgi organization|ER-associated ubiquitin-dependent protein catabolic process|membrane fusion|	protein binding|zinc ion binding|	7	1.5	8.33	4	1.8	10.4	1.8	18.2	0.00118	1	3.4	0	0	0
ENSMUSG00000054226	TPRKB	TP53RK binding protein	nucleus|cytoplasm|cytosol|	tRNA processing|	protein binding|protein kinase binding|	7	1.7	8.68	7	2	10	1.8	18.1	0.00123	0.9	3.1	0	0	0
ENSMUSG00000006304	ARPC2	actin related protein 2/3 complex, subunit 2, 34kDa	cytoplasm|endosome|Golgi apparatus|cytosol|Arp2/3 protein complex|plasma membrane|focal adhesion|actin cytoskeleton|cell leading edge|neuron projection|synapse|extracellular vesicular exosome|	cellular component movement|positive regulation of lamellipodium assembly|positive regulation of actin filament polymerization|Fc-gamma receptor signaling pathway involved in phagocytosis|innate immune response|positive regulation of substrate adhesion-dependent cell spreading|	actin binding|structural constituent of cytoskeleton|protein binding|kinesin binding|AP-1 adaptor complex binding|Arp2/3 complex binding|	10	-1.7	16.2	9	-0.9	3.13	-1.5	18.1	0.00123	-2.6	-0.7	0	0	0
ENSMUSG00000086815	3110082J24RIK	RIKEN cDNA 3110082J24 gene	cellular_component|	biological_process|	molecular_function|	6	3.9	20.4	6	0.5	1	3.8	18.1	0.00123	2.8	6.9	0	0	0
ENSMUSG00000047213	YTHDF3	YTH domain family, member 3	None	None	protein binding|poly(A) RNA binding|N6-methyladenosine-containing RNA binding|	10	1.5	1.43	10	-3.3	21.4	-3.3	18	0.00128	-6	-1.7	0	0	0
ENSMUSG00000023932	CDC5L	cell division cycle 5-like	Prp19 complex|nucleus|nucleolus|cytoplasm|membrane|nuclear speck|catalytic step 2 spliceosome|	mRNA splicing, via spliceosome|transcription, DNA-templated|regulation of transcription, DNA-templated|cell cycle|	DNA binding|chromatin binding|protein binding|poly(A) RNA binding|WD40-repeat domain binding|	5	3.5	17.5	6	1.3	3.54	2.1	18	0.00128	1.2	5.6	0	0	0
ENSMUSG00000037148	ARHGAP10	Rho GTPase activating protein 10	cytosol|plasma membrane|perinuclear region of cytoplasm|	apoptotic process|cytoskeleton organization|small GTPase mediated signal transduction|positive regulation of Rho GTPase activity|regulation of apoptotic process|negative regulation of apoptotic process|regulation of small GTPase mediated signal transduction|	Rho GTPase activator activity|protein binding|	10	1.8	9.09	10	2.5	10.1	2.2	18	0.00128	1	3.4	0	0	0
ENSMUSG00000027496	AURKA	aurora kinase A	nucleus|centrosome|centrosome|spindle|cytosol|spindle microtubule|microtubule cytoskeleton|midbody|spindle pole centrosome|perinuclear region of cytoplasm|	G2/M transition of mitotic cell cycle|mitotic cell cycle|protein phosphorylation|cell cycle|spindle organization|mitotic nuclear division|cell projection organization|anaphase-promoting complex-dependent proteasomal ubiquitin-dependent protein catabolic process|regulation of protein stability|negative regulation of protein binding|spindle stabilization|positive regulation of mitosis|regulation of…	protein kinase activity|protein serine/threonine kinase activity|protein serine/threonine/tyrosine kinase activity|protein binding|ATP binding|protein kinase binding|ubiquitin protein ligase binding|	8	2.3	4.74	10	1.9	13.7	2.1	17.9	0.00133	1.1	3.4	0	0	0
ENSMUSG00000029911	SSBP1	single-stranded DNA binding protein 1, mitochondrial	nucleus|mitochondrion|mitochondrial nucleoid|extracellular vesicular exosome|	DNA replication|positive regulation of helicase activity|mitochondrion morphogenesis|	chromatin binding|single-stranded DNA binding|protein binding|poly(A) RNA binding|	8	3.1	14.8	10	1.4	6.69	2.4	17.9	0.00133	1.1	4	0	0	0
ENSMUSG00000030751	PSMA1	proteasome (prosome, macropain) subunit, alpha type, 1	proteasome complex|nucleus|nucleoplasm|centrosome|cytosol|proteasome core complex|polysome|proteasome core complex, alpha-subunit complex|extracellular vesicular exosome|	G1/S transition of mitotic cell cycle|protein polyubiquitination|mitotic cell cycle|antigen processing and presentation of peptide antigen via MHC class I|antigen processing and presentation of exogenous peptide antigen via MHC class I, TAP-dependent|regulation of cellular amino acid metabolic process|apoptotic process|DNA damage response, signal transduction by p53 class mediator resulting in ce…	RNA binding|threonine-type endopeptidase activity|protein binding|	7	1.5	7.59	5	-3.1	20.9	-3	17.9	0.00133	-6	-1.4	0	0	0
ENSMUSG00000052656	RNF103	ring finger protein 103	endoplasmic reticulum|endoplasmic reticulum membrane|integral component of membrane|	central nervous system development|protein ubiquitination|protein ubiquitination|ER-associated ubiquitin-dependent protein catabolic process|	ubiquitin-protein transferase activity|protein binding|zinc ion binding|ligase activity|	10	1.2	4.7	9	1.5	13.5	1.5	17.7	0.00141	0.9	3.6	0	0	0
ENSMUSG00000090272	MNDAL	myeloid nuclear differentiation antigen like	nucleus|nucleus|nucleolus|cytoplasm|membrane|	negative regulation of cell growth|regulation of growth|	double-stranded DNA binding|transcription factor binding|poly(A) RNA binding|	10	4.4	17.7	10	1.1	4.09	1.1	17.7	0.00141	0.4	7.7	0	0	0
ENSMUSG00000062995	ICA1	islet cell autoantigen 1, 69kDa	Golgi membrane|cytoplasm|cytosol|cell junction|transport vesicle membrane|secretory granule membrane|synaptic vesicle membrane|	neurotransmitter transport|	molecular_function|protein domain specific binding|	10	2.3	10.9	8	1.8	7.39	2	17.6	0.00145	1.2	3.5	0	0	0
ENSMUSG00000040325	VPRBP	Vpr (HIV-1) binding protein	nucleus|cytoplasm|COP9 signalosome|	negative regulation of transcription from RNA polymerase II promoter|transcription, DNA-templated|viral process|protein ubiquitination|B cell differentiation|V(D)J recombination|cell competition in a multicellular organism|histone H2A-T120 phosphorylation|	protein binding|ATP binding|histone kinase activity (H2A-T120 specific)|	10	1.5	12.7	9	1.2	5.65	1.4	17.6	0.00145	0.9	2.4	0	0	0
ENSMUSG00000039230	TBCD	tubulin folding cofactor D	cytoplasm|microtubule|adherens junction|tight junction|lateral plasma membrane|	protein folding|protein folding|post-chaperonin tubulin folding pathway|negative regulation of cell-substrate adhesion|negative regulation of microtubule polymerization|adherens junction assembly|positive regulation of GTPase activity|positive regulation of GTPase activity|positive regulation of GTPase activity|cellular protein metabolic process|'de novo' posttranslational protein folding|tight j…	GTPase activator activity|GTPase activator activity|protein binding|beta-tubulin binding|chaperone binding|	7	2.8	7.22	8	1.8	11.6	1.9	17.6	0.00145	1.1	3.6	0	0	0
ENSMUSG00000021302	GGPS1	geranylgeranyl diphosphate synthase 1	cytosol|	cholesterol biosynthetic process|isoprenoid metabolic process|geranyl diphosphate biosynthetic process|geranylgeranyl diphosphate biosynthetic process|small molecule metabolic process|farnesyl diphosphate biosynthetic process|	dimethylallyltranstransferase activity|farnesyltranstransferase activity|geranyltranstransferase activity|metal ion binding|	7	1.7	8.04	7	1.8	9.97	1.7	17.6	0.00145	0.9	3	0	0	0
ENSMUSG00000023150	IVNS1ABP	influenza virus NS1A binding protein	nucleoplasm|transcription factor complex|spliceosomal complex|cytoplasm|cytoskeleton|	transcription from RNA polymerase III promoter|RNA splicing|response to virus|viral process|negative regulation of intrinsic apoptotic signaling pathway|	None	7	3.3	4.81	8	3	13.3	3.2	17.6	0.00145	1.7	5.5	0	0	0
ENSMUSG00000060098	PRMT7	protein arginine methyltransferase 7	nucleus|nucleolus|cytosol|plasma membrane|	spliceosomal snRNP assembly|regulation of gene expression by genetic imprinting|transcription, DNA-templated|regulation of transcription, DNA-templated|histone methylation|peptidyl-arginine methylation|peptidyl-arginine methylation|peptidyl-arginine methylation, to symmetrical-dimethyl arginine|peptidyl-arginine methylation, to symmetrical-dimethyl arginine|peptidyl-arginine methylation, to asymm…	histone-arginine N-methyltransferase activity|S-adenosylmethionine-dependent methyltransferase activity|[myelin basic protein]-arginine N-methyltransferase activity|protein-arginine omega-N monomethyltransferase activity|protein-arginine omega-N asymmetric methyltransferase activity|protein-arginine omega-N symmetric methyltransferase activity|protein-arginine omega-N symmetric methyltransferase …	10	1.8	14.7	10	2	3.31	1.9	17.5	0.00148	1.3	3.1	0	0	0
ENSMUSG00000032040	DCPS	decapping enzyme, scavenger	nucleus|cytoplasm|mitochondrion|cytosol|	nuclear-transcribed mRNA catabolic process, deadenylation-dependent decay|deadenylation-dependent decapping of nuclear-transcribed mRNA|gene expression|RNA metabolic process|mRNA metabolic process|cellular response to menadione|negative regulation of programmed cell death|exonucleolytic nuclear-transcribed mRNA catabolic process involved in deadenylation-dependent decay|mRNA cis splicing, via spl…	RNA 7-methylguanosine cap binding|protein binding|m7G(5')pppN diphosphatase activity|	8	3.1	15.1	8	2.6	3.23	3	17.5	0.00148	1.6	5	0	0	0
ENSMUSG00000044018	MRPL50	mitochondrial ribosomal protein L50	mitochondrion|ribosome|	None	None	8	1.9	8.4	8	2.2	9.65	2.1	17.4	0.00151	1.2	3.4	0	0	0
ENSMUSG00000042699	DHX9	DEAH (Asp-Glu-Ala-His) box helicase 9	nucleus|nucleoplasm|nucleolus|cytoplasm|centrosome|cytosol|membrane|ribonucleoprotein complex|cytoplasmic ribonucleoprotein granule|CRD-mediated mRNA stability complex|	mRNA splicing, via spliceosome|osteoblast differentiation|ATP catabolic process|ATP catabolic process|circadian rhythm|RNA splicing|gene expression|positive regulation of type I interferon production|DNA duplex unwinding|cellular response to heat|innate immune response|CRD-mediated mRNA stabilization|	RNA polymerase II transcription factor binding|DNA binding|RNA helicase activity|ATP-dependent DNA helicase activity|ATP-dependent RNA helicase activity|protein binding|ATP binding|poly(A) RNA binding|	6	3	10.1	4	2.4	8.12	2.6	17.4	0.00151	1.5	4.9	0	0	0
ENSMUSG00000034667	XPOT	exportin, tRNA	nucleus|nuclear pore|nucleoplasm|cytoplasm|	tRNA export from nucleus|intracellular protein transport|	tRNA binding|Ran GTPase binding|	8	3.1	10.2	8	1.5	8.55	1.8	17.4	0.00151	1.1	3.8	0	0	0
ENSMUSG00000026032	NDUFB3	NADH dehydrogenase (ubiquinone) 1 beta subcomplex, 3, 12kDa	mitochondrial inner membrane|mitochondrial respiratory chain complex I|mitochondrial respiratory chain complex I|integral component of membrane|extracellular vesicular exosome|	mitochondrial electron transport, NADH to ubiquinone|respiratory electron transport chain|cellular metabolic process|small molecule metabolic process|	NADH dehydrogenase (ubiquinone) activity|	8	3	10.4	6	1.7	8.05	1.8	17.4	0.00151	1.2	4	0	0	0
ENSMUSG00000038014	FAM120A	family with sequence similarity 120A	cytoplasm|plasma membrane|membrane|	None	poly(A) RNA binding|	10	1.9	5.74	9	2.9	12.3	2.6	17.3	0.00154	1.2	4.1	0	0	0
ENSMUSG00000022024	SUGT1	SGT1, suppressor of G2 allele of SKP1 (S. cerevisiae)	ubiquitin ligase complex|kinetochore|nucleus|cytoplasm|cytosol|	mitotic nuclear division|nucleotide-binding domain, leucine rich repeat containing receptor signaling pathway|innate immune response|	protein binding|	6	2.1	10.2	6	2	7.56	2.1	17.3	0.00154	1.2	3.8	0	0	0
ENSMUSG00000022871	FETUB	fetuin B	extracellular space|	single fertilization|binding of sperm to zona pellucida|biological_process|negative regulation of endopeptidase activity|	molecular_function|cysteine-type endopeptidase inhibitor activity|metalloendopeptidase inhibitor activity|	9	3	9.15	10	2	8.54	2	17.2	0.00156	1.1	3.7	0	0	0
ENSMUSG00000035325	SEC31A	SEC31 homolog A (S. cerevisiae)	Golgi membrane|cytoplasm|endoplasmic reticulum|endoplasmic reticulum membrane|cytosol|ER to Golgi transport vesicle membrane|vesicle coat|COPII vesicle coat|ER to Golgi transport vesicle|intracellular membrane-bounded organelle|perinuclear region of cytoplasm|	antigen processing and presentation of peptide antigen via MHC class I|ER to Golgi vesicle-mediated transport|ER to Golgi vesicle-mediated transport|activation of signaling protein activity involved in unfolded protein response|protein transport|protein N-linked glycosylation via asparagine|antigen processing and presentation of exogenous peptide antigen via MHC class II|endoplasmic reticulum unf…	protein binding|calcium-dependent protein binding|	8	0.6	0.85	8	2.5	18.5	2.4	17.2	0.00156	1.5	4.2	0	0	0
ENSMUSG00000030265	KRAS	Kirsten rat sarcoma viral oncogene homolog	mitochondrion|plasma membrane|membrane|membrane raft|	MAPK cascade|activation of MAPKK activity|positive regulation of protein phosphorylation|GTP catabolic process|epidermal growth factor receptor signaling pathway|small GTPase mediated signal transduction|Ras protein signal transduction|axon guidance|blood coagulation|positive regulation of cell proliferation|insulin receptor signaling pathway|visual learning|fibroblast growth factor receptor sign…	protein binding|GTP binding|GMP binding|GDP binding|LRR domain binding|protein complex binding|	5	2.5	8.39	4	-3	19.4	-3	17.2	0.00156	-6	-1.3	0	0	0
ENSMUSG00000021311	MTR	5-methyltetrahydrofolate-homocysteine methyltransferase	cytosol|	sulfur amino acid metabolic process|vitamin metabolic process|water-soluble vitamin metabolic process|xenobiotic metabolic process|nervous system development|methionine biosynthetic process|cobalamin metabolic process|methylation|cellular nitrogen compound metabolic process|pteridine-containing compound metabolic process|small molecule metabolic process|	zinc ion binding|methionine synthase activity|S-adenosylmethionine-homocysteine S-methyltransferase activity|cobalamin binding|	7	1.9	12	5	2.6	5.71	2.2	17.1	0.0016	1.1	3.8	0	0	0
ENSMUSG00000024247	PKDCC	protein kinase domain containing, cytoplasmic	Golgi apparatus|	skeletal system development|protein phosphorylation|protein transport|cell differentiation|bone mineralization|positive regulation of bone mineralization|positive regulation of chondrocyte differentiation|multicellular organism growth|negative regulation of Golgi to plasma membrane protein transport|lung alveolus development|embryonic digestive tract development|palate development|	protein kinase activity|ATP binding|	8	3.3	18.9	9	0.7	1.49	2.1	17.1	0.0016	1.4	5.3	0	0	0
ENSMUSG00000051329	NUP160	nucleoporin 160kDa	kinetochore|nuclear envelope|nuclear pore|cytosol|nuclear pore outer ring|nuclear pore outer ring|	mitotic cell cycle|carbohydrate metabolic process|mRNA export from nucleus|mitotic nuclear envelope disassembly|hexose transport|regulation of glucose transport|protein transport|glucose transport|viral process|cytokine-mediated signaling pathway|small molecule metabolic process|transmembrane transport|	nucleocytoplasmic transporter activity|protein binding|	4	2.5	10.9	4	1.4	8.18	1.8	17.1	0.0016	1	4	0	0	0
ENSMUSG00000030726	POLD3	polymerase (DNA-directed), delta 3, accessory subunit	nucleus|nucleoplasm|mitochondrion|delta DNA polymerase complex|	mitotic cell cycle|telomere maintenance via recombination|telomere maintenance|DNA synthesis involved in DNA repair|DNA strand elongation involved in DNA replication|DNA repair|transcription-coupled nucleotide-excision repair|base-excision repair|nucleotide-excision repair|nucleotide-excision repair, DNA gap filling|nucleotide-excision repair, DNA gap filling|mismatch repair|telomere maintenance …	DNA-directed DNA polymerase activity|protein binding|	8	1.5	5.62	8	2	12.2	1.9	17	0.00162	1.1	3.3	0	0	0
ENSMUSG00000031299	PDHA1	pyruvate dehydrogenase (lipoamide) alpha 1	nucleus|mitochondrion|mitochondrial matrix|pyruvate dehydrogenase complex|	glucose metabolic process|acetyl-CoA biosynthetic process from pyruvate|pyruvate metabolic process|glycolytic process|tricarboxylic acid cycle|regulation of acetyl-CoA biosynthetic process from pyruvate|cellular metabolic process|small molecule metabolic process|	pyruvate dehydrogenase activity|pyruvate dehydrogenase (acetyl-transferring) activity|	10	1.6	9.91	10	1.3	7.64	1.5	17	0.00162	0.8	3.2	0	0	0
ENSMUSG00000060985	TDRD5	tudor domain containing 5	chromatoid body|pi-body|	spermatid development|P granule organization|DNA methylation involved in gamete generation|	None	7	1.8	8.69	9	1.7	8.72	1.8	17	0.00162	1.1	3	0	0	0
ENSMUSG00000020430	PES1	pescadillo ribosomal biogenesis factor 1	condensed chromosome|nucleoplasm|nucleolus|cytoplasm|membrane|preribosome, large subunit precursor|PeBoW complex|	maturation of LSU-rRNA from tricistronic rRNA transcript (SSU-rRNA, 5.8S rRNA, LSU-rRNA)|maturation of 5.8S rRNA from tricistronic rRNA transcript (SSU-rRNA, 5.8S rRNA, LSU-rRNA)|rRNA processing|nucleolus organization|cell proliferation|cell proliferation|protein localization to organelle|ribosomal large subunit biogenesis|regulation of cell cycle|	protein binding|ribonucleoprotein complex binding|poly(A) RNA binding|	5	1.6	6.26	6	1.6	11.1	1.6	17	0.00162	0.9	2.9	0	0	0
ENSMUSG00000069309	HIST1H2AN	histone cluster 1, H2an	nucleus|extracellular vesicular exosome|	biological_process|	enzyme binding|	0	0	0	5	2.8	17.1	2.8	17	0.00162	1.7	5.6	0	0	0
ENSMUSG00000031516	DCTN6	dynactin 6	condensed chromosome kinetochore|centrosome|cytosol|dynactin complex|	antigen processing and presentation of exogenous peptide antigen via MHC class II|	dynein binding|	6	2.3	8.09	4	2.4	9.17	2.3	16.9	0.00165	1.1	4	0	0	0
ENSMUSG00000060938	RPL26	ribosomal protein L26	cytosol|membrane|cytosolic large ribosomal subunit|extracellular vesicular exosome|	nuclear-transcribed mRNA catabolic process, nonsense-mediated decay|rRNA processing|translation|translation|translational initiation|translational elongation|translational termination|SRP-dependent cotranslational protein targeting to membrane|gene expression|viral process|RNA metabolic process|mRNA metabolic process|viral life cycle|viral transcription|ribosomal large subunit biogenesis|cellular…	RNA binding|structural constituent of ribosome|poly(A) RNA binding|	6	1.7	7.84	8	1.7	9.33	1.7	16.8	0.00168	0.9	2.9	0	0	0
ENSMUSG00000072761	GM6712	predicted gene 6712	None	None	None	10	2.5	14.9	10	2.1	2.29	2.4	16.8	0.00168	1.5	3.9	0	0	0
ENSMUSG00000048076	ARF1	ADP-ribosylation factor 1	Golgi membrane|cytosol|plasma membrane|postsynaptic density|sarcomere|cell junction|neuron projection|postsynaptic membrane|perinuclear region of cytoplasm|extracellular vesicular exosome|	regulation of receptor internalization|GTP catabolic process|phospholipid metabolic process|phosphatidylinositol biosynthetic process|cellular copper ion homeostasis|retrograde vesicle-mediated transport, Golgi to ER|post-Golgi vesicle-mediated transport|small GTPase mediated signal transduction|protein transport|viral process|antigen processing and presentation of exogenous peptide antigen via M…	GTPase activity|receptor signaling protein activity|protein binding|GTP binding|poly(A) RNA binding|	9	-0.4	0.465	10	1.5	18.1	1.4	16.7	0.00172	0.8	2.6	0	0	0
ENSMUSG00000043241	UPF2	UPF2 regulator of nonsense transcripts homolog (yeast)	nucleus|cytoplasm|cytosol|exon-exon junction complex|perinuclear region of cytoplasm|	nuclear-transcribed mRNA catabolic process, nonsense-mediated decay|nuclear-transcribed mRNA catabolic process, nonsense-mediated decay|liver development|mRNA export from nucleus|gene expression|RNA metabolic process|mRNA metabolic process|organ regeneration|	RNA binding|protein binding|	9	3.5	11.3	9	2.6	6.37	2.7	16.6	0.00174	1.7	5.5	0	0	0
ENSMUSG00000028367	TXN1	thioredoxin 1	extracellular region|nucleus|nucleus|cytoplasm|cytoplasm|mitochondrion|cytosol|cytosol|axon|dendrite|neuronal cell body|extracellular vesicular exosome|	negative regulation of transcription from RNA polymerase II promoter|transcription, DNA-templated|regulation of transcription, DNA-templated|glycerol ether metabolic process|transport|response to radiation|regulation of protein import into nucleus, translocation|positive regulation of DNA binding|cell redox homeostasis|negative regulation of protein export from nucleus|oxidation-reduction process…	protein binding|protein disulfide oxidoreductase activity|peptide disulfide oxidoreductase activity|enzyme binding|poly(A) RNA binding|	6	2.1	9.33	6	2.1	7.66	2.1	16.6	0.00174	1.3	3.9	0	0	0
ENSMUSG00000020946	GOSR2	golgi SNAP receptor complex member 2	Golgi membrane|Golgi stack|membrane|integral component of membrane|	ER to Golgi vesicle-mediated transport|activation of signaling protein activity involved in unfolded protein response|protein transport|endoplasmic reticulum unfolded protein response|cellular protein metabolic process|membrane fusion|	transporter activity|	9	1.8	10.3	9	1.4	6.9	1.7	16.5	0.00177	0.9	2.6	0	0	0
ENSMUSG00000033596	RFWD3	ring finger and WD repeat domain 3	nucleus|cytoplasm|PML body|site of double-strand break|	DNA repair|response to ionizing radiation|protein ubiquitination|protein ubiquitination|mitotic G1 DNA damage checkpoint|regulation of DNA damage checkpoint|	p53 binding|ubiquitin-protein transferase activity|protein binding|zinc ion binding|ligase activity|MDM2/MDM4 family protein binding|	6	1.7	2.84	7	1.5	14.2	1.6	16.5	0.00177	1	3	0	0	0
ENSMUSG00000035594	CHRNA5	cholinergic receptor, nicotinic, alpha 5 (neuronal)	plasma membrane|acetylcholine-gated channel complex|cell junction|postsynaptic membrane|	transport|cation transport|cation transport|cation transport|signal transduction|synaptic transmission|ion transmembrane transport|ion transmembrane transport|behavioral response to nicotine|	acetylcholine-activated cation-selective channel activity|acetylcholine-activated cation-selective channel activity|ligand-gated ion channel activity|acetylcholine receptor activity|	9	1.8	11.7	10	1.7	5.29	1.7	16.5	0.00177	0.9	2.8	0	0	0
ENSMUSG00000027244	ATG13	autophagy related 13	pre-autophagosomal structure|pre-autophagosomal structure|cytosol|Atg1p signaling complex|ULK1-ATG13-FIP200 complex|	autophagic vacuole assembly|	protein binding|protein kinase binding|	7	1.9	16.1	8	0.9	3.12	1.8	16.4	0.00179	0.9	3.2	0	0	0
ENSMUSG00000029177	CENPA	centromere protein A	chromosome, centromeric region|condensed nuclear chromosome kinetochore|condensed nuclear chromosome, centromeric region|nucleosome|condensed chromosome inner kinetochore|nucleus|nucleoplasm|cytosol|	establishment of mitotic spindle orientation|mitotic cell cycle|nucleosome assembly|viral process|centromere-specific nucleosome assembly|kinetochore assembly|protein localization to chromosome, centromeric region|	DNA binding|chromatin binding|protein binding|protein heterodimerization activity|	9	1.5	13.6	8	1.1	3.51	1.4	16.4	0.00179	0.8	2.5	0	0	0
ENSMUSG00000004552	CTSE	cathepsin E	endosome|extracellular vesicular exosome|	proteolysis|digestion|protein autoprocessing|antigen processing and presentation of exogenous peptide antigen via MHC class II|	aspartic-type endopeptidase activity|protein homodimerization activity|	9	1.7	8.72	9	1.5	8.23	1.6	16.4	0.00179	1	3.3	0	0	0
ENSMUSG00000031389	ARHGAP4	Rho GTPase activating protein 4	cytoplasm|cytosol|growth cone|	cytoskeleton organization|small GTPase mediated signal transduction|Rho protein signal transduction|positive regulation of signal transduction|negative regulation of fibroblast migration|negative regulation of axon extension|positive regulation of Rho GTPase activity|positive regulation of apoptotic process|neurotrophin TRK receptor signaling pathway|regulation of small GTPase mediated signal tra…	SH3/SH2 adaptor activity|Rho GTPase activator activity|protein binding|	10	2.1	16.1	10	1.5	0.717	2	16.3	0.00181	1.3	3.6	0	0	0
ENSMUSG00000026604	PTPN14	protein tyrosine phosphatase, non-receptor type 14	nucleus|cytoplasm|cytoskeleton|	lymphangiogenesis|transcription, DNA-templated|regulation of transcription, DNA-templated|protein dephosphorylation|negative regulation of cell proliferation|peptidyl-tyrosine dephosphorylation|peptidyl-tyrosine dephosphorylation|peptidyl-tyrosine dephosphorylation|regulation of protein export from nucleus|	transcription cofactor activity|protein tyrosine phosphatase activity|protein binding|receptor tyrosine kinase binding|	10	2	19.3	10	-1.2	4.04	1.9	16.3	0.00181	1.1	3.3	0	0	0
ENSMUSG00000028847	TRAPPC3	trafficking protein particle complex 3	Golgi membrane|endoplasmic reticulum|cytosol|TRAPP complex|	ER to Golgi vesicle-mediated transport|	protein binding|	7	2.8	7.7	7	1.8	9.55	2	16.3	0.00181	1.1	4	0	0	0
ENSMUSG00000020702	CCL1	chemokine (C-C motif) ligand 1	extracellular space|	cellular calcium ion homeostasis|chemotaxis|immune response|signal transduction|viral process|cell chemotaxis|cell chemotaxis|	chemokine activity|	9	1.5	10.5	7	1.9	6.57	1.7	16.2	0.00184	0.9	2.9	0	0	0
ENSMUSG00000028960	UBE4B	ubiquitination factor E4B	ubiquitin ligase complex|cytoplasm|	granzyme-mediated apoptotic signaling pathway|response to UV|protein ubiquitination involved in ubiquitin-dependent protein catabolic process|proteasome-mediated ubiquitin-dependent protein catabolic process|	enzyme binding|ubiquitin-ubiquitin ligase activity|	9	1.8	10.4	8	2	6.17	1.9	16.1	0.00186	1.1	3.2	0	0	0
ENSMUSG00000001674	DDX18	DEAD (Asp-Glu-Ala-Asp) box polypeptide 18	nucleolus|membrane|	ATP catabolic process|ATP catabolic process|	ATP-dependent RNA helicase activity|protein binding|ATP binding|poly(A) RNA binding|	6	1.7	12.4	4	1.9	4.01	1.7	16.1	0.00186	1.1	3.3	0	0	0
ENSMUSG00000052533	NUP188	nucleoporin 188kDa	nuclear envelope|nuclear pore|membrane|	mitotic cell cycle|carbohydrate metabolic process|mitotic nuclear envelope disassembly|hexose transport|regulation of glucose transport|protein transport|glucose transport|viral process|cytokine-mediated signaling pathway|small molecule metabolic process|mRNA transport|transmembrane transport|	None	10	1.6	10.2	10	1.8	6.47	1.6	16.1	0.00186	0.9	3.4	0	0	0
ENSMUSG00000028041	ADAM15	ADAM metallopeptidase domain 15	acrosomal vesicle|plasma membrane|adherens junction|integral component of membrane|cell projection|	angiogenesis|proteolysis|cell-matrix adhesion|extracellular matrix disassembly|extracellular matrix organization|collagen catabolic process|tissue regeneration|cardiac epithelial to mesenchymal transition|	metalloendopeptidase activity|protein binding|metallopeptidase activity|zinc ion binding|SH3 domain binding|	9	3	14.1	8	1.8	3.74	2.8	16.1	0.00186	1.6	4.8	0	0	0
ENSMUSG00000039985	FAM60A	family with sequence similarity 60, member A	Sin3 complex|	negative regulation of cell migration|	protein binding|	10	1.7	6.13	10	1.2	10.7	1.3	16.1	0.00186	0.7	2.2	0	0	0
ENSMUSG00000003421	NOSIP	nitric oxide synthase interacting protein	Golgi membrane|nucleus|cytoplasm|cytosol|	negative regulation of catalytic activity|small molecule metabolic process|nitric oxide metabolic process|regulation of nitric-oxide synthase activity|negative regulation of nitric-oxide synthase activity|	protein binding|poly(A) RNA binding|	9	1.8	3.24	7	2.6	14.3	2.5	16.1	0.00186	1.2	4.4	0	0	0
ENSMUSG00000037622	WDTC1	WD and tetratricopeptide repeats 1	nucleus|cytosol|	negative regulation of transcription from RNA polymerase II promoter|in utero embryonic development|glucose metabolic process|regulation of cell size|protein ubiquitination|cellular response to insulin stimulus|multicellular organism growth|negative regulation of catalytic activity|negative regulation of fatty acid biosynthetic process|cellular chemical homeostasis|	enzyme inhibitor activity|protein binding|histone binding|histone deacetylase binding|	8	2.5	13.1	9	1.5	5.22	2.3	16	0.00189	1.1	3.7	0	0	0
ENSMUSG00000025204	NDUFB8	NADH dehydrogenase (ubiquinone) 1 beta subcomplex, 8, 19kDa	mitochondrial inner membrane|mitochondrial respiratory chain complex I|mitochondrial respiratory chain complex I|endoplasmic reticulum|integral component of membrane|	mitochondrial electron transport, NADH to ubiquinone|respiratory electron transport chain|cellular metabolic process|small molecule metabolic process|	NADH dehydrogenase (ubiquinone) activity|	10	2.3	6.77	9	2.6	9.86	2.4	16	0.00189	1.5	3.9	0	0	0
ENSMUSG00000036875	DNA2	DNA replication helicase/nuclease 2	nucleus|nucleoplasm|gamma DNA polymerase complex|mitochondrial nucleoid|	DNA replication checkpoint|mitotic cell cycle|telomere maintenance via recombination|telomere maintenance|DNA double-strand break processing|DNA catabolic process, endonucleolytic|ATP catabolic process|ATP catabolic process|DNA replication|mitochondrial DNA replication|DNA strand elongation involved in DNA replication|base-excision repair|telomere maintenance via semi-conservative replication|DNA…	DNA binding|DNA helicase activity|helicase activity|nuclease activity|protein binding|ATP binding|ATPase activity|site-specific endodeoxyribonuclease activity, specific for altered base|5'-flap endonuclease activity|5'-3' DNA helicase activity|single-stranded DNA-dependent ATPase activity|metal ion binding|4 iron, 4 sulfur cluster binding|	9	1.6	10.3	8	1.3	6.45	1.5	16	0.00189	0.8	2.5	0	0	0
ENSMUSG00000053604	RPIA	ribose 5-phosphate isomerase A	cytosol|intracellular membrane-bounded organelle|	carbohydrate metabolic process|pentose-phosphate shunt|pentose-phosphate shunt, non-oxidative branch|ribose phosphate metabolic process|small molecule metabolic process|	ribose-5-phosphate isomerase activity|monosaccharide binding|	10	1.7	4.22	9	2.2	12.5	2	15.9	0.00191	1.2	3.4	0	0	0
ENSMUSG00000028156	EIF4E	eukaryotic translation initiation factor 4E	cytoplasmic mRNA processing body|cytoplasm|cytosol|mRNA cap binding complex|cytoplasmic stress granule|eukaryotic translation initiation factor 4F complex|RISC complex|chromatoid body|extracellular vesicular exosome|	G1/S transition of mitotic cell cycle|nuclear-transcribed mRNA catabolic process, deadenylation-dependent decay|nuclear-transcribed mRNA poly(A) tail shortening|mRNA export from nucleus|translation|translational initiation|regulation of translation|insulin receptor signaling pathway|gene expression|viral process|RNA metabolic process|mRNA metabolic process|cytokine-mediated signaling pathway|lung…	RNA cap binding|translation initiation factor activity|translation initiation factor activity|protein binding|eukaryotic initiation factor 4G binding|poly(A) RNA binding|	8	1.7	13.9	5	1.2	3.19	1.6	15.8	0.00193	0.9	2.9	0	0	0
ENSMUSG00000019905	GPRC6A	G protein-coupled receptor, class C, group 6, member A	plasma membrane|cell surface|integral component of membrane|	G-protein coupled receptor signaling pathway|calcium-mediated signaling|response to amino acid|	G-protein coupled receptor activity|	10	3.7	9.79	8	3.4	6.58	3.6	15.8	0.00193	1.1	5.9	0	0	0
ENSMUSG00000062588	GM6104	high mobility group box 3 pseudogene	None	None	None	10	1.7	6.68	9	2.6	9.97	2.5	15.8	0.00193	1.3	3.8	0	0	0
ENSMUSG00000030788	RNF141	ring finger protein 141	None	regulation of transcription, DNA-templated|protein autoubiquitination|	DNA binding|ubiquitin-protein transferase activity|zinc ion binding|	9	3.2	6.7	9	2.2	10.2	2.3	15.8	0.00193	1.2	4.4	0	0	0
ENSMUSG00000038736	NUDCD1	NudC domain containing 1	nucleus|cytoplasm|	immune system process|	None	9	1.4	8.28	9	1.7	8.28	1.5	15.8	0.00193	0.8	2.6	0	0	0
ENSMUSG00000030713	KLK7	kallikrein-related peptidase 7	extracellular region|epidermal lamellar body|	proteolysis|epidermis development|extracellular matrix disassembly|extracellular matrix organization|	serine-type endopeptidase activity|serine-type peptidase activity|	9	1.8	9.04	9	1.4	7.67	1.6	15.8	0.00193	0.9	2.7	0	0	0
ENSMUSG00000022890	ATP5J	ATP synthase, H+ transporting, mitochondrial Fo complex, subunit F6	mitochondrial proton-transporting ATP synthase complex, coupling factor F(o)|mitochondrion|mitochondrial inner membrane|mitochondrial proton-transporting ATP synthase complex|	ATP catabolic process|substantia nigra development|respiratory electron transport chain|mitochondrial ATP synthesis coupled proton transport|mitochondrial ATP synthesis coupled proton transport|cellular metabolic process|small molecule metabolic process|	transporter activity|hydrogen ion transmembrane transporter activity|ATPase activity|transmembrane transporter activity|	7	2.9	4.89	8	1.7	12.2	1.7	15.8	0.00193	1	3.7	0	0	0
ENSMUSG00000020849	YWHAE	tyrosine 3-monooxygenase/tryptophan 5-monooxygenase activation protein, epsilon	mitochondrion|cytosol|kinesin complex|membrane|cytoplasmic vesicle membrane|melanosome|extracellular vesicular exosome|	G2/M transition of mitotic cell cycle|mitotic cell cycle|neuron migration|regulation of heart rate by hormone|protein targeting|apoptotic process|viral process|substantia nigra development|hippocampus development|cerebral cortex development|hippo signaling|intracellular signal transduction|regulation of cysteine-type endopeptidase activity involved in apoptotic process|neurotrophin TRK receptor s…	protein binding|potassium channel regulator activity|enzyme binding|protein domain specific binding|MHC class II protein complex binding|histone deacetylase binding|ion channel binding|poly(A) RNA binding|protein heterodimerization activity|phosphoserine binding|phosphoprotein binding|	10	0.4	0.185	10	-2.8	18.9	-2.7	15.7	0.00194	-5.5	-0.6	0	0	0
ENSMUSG00000006678	POLA1	polymerase (DNA directed), alpha 1, catalytic subunit	chromatin|nucleus|nuclear envelope|nucleoplasm|nucleoplasm|alpha DNA polymerase:primase complex|alpha DNA polymerase:primase complex|nucleolus|cytoplasm|nuclear matrix|	G1/S transition of mitotic cell cycle|regulation of transcription involved in G1/S transition of mitotic cell cycle|mitotic S phase|mitotic cell cycle|telomere maintenance via recombination|telomere maintenance|DNA replication|DNA replication, synthesis of RNA primer|DNA replication initiation|DNA replication initiation|DNA strand elongation involved in DNA replication|DNA strand elongation invol…	nucleotide binding|nucleoside binding|DNA binding|DNA binding|chromatin binding|DNA-directed DNA polymerase activity|DNA-directed DNA polymerase activity|DNA primase activity|protein binding|3'-5' exonuclease activity|metal ion binding|protein heterodimerization activity|4 iron, 4 sulfur cluster binding|	8	1.8	12.1	7	1.8	4.02	1.8	15.7	0.00194	1.2	3.2	0	0	0
ENSMUSG00000005410	MCM5	minichromosome maintenance complex component 5	nucleus|nucleoplasm|membrane|MCM complex|	G1/S transition of mitotic cell cycle|mitotic cell cycle|DNA replication|DNA replication initiation|DNA strand elongation involved in DNA replication|DNA duplex unwinding|	DNA binding|DNA helicase activity|protein binding|ATP binding|	5	1.7	6.6	6	2.3	10.1	2	15.7	0.00194	1.1	3.8	0	0	0
ENSMUSG00000022021	DIAP3	diaphanous homolog 3 (Drosophila)	nucleus|cytoplasm|	cellular component organization|actin cytoskeleton organization|	actin binding|Rho GTPase binding|	7	1.7	6.09	7	2.4	10.8	1.8	15.7	0.00194	1	3.8	0	0	0
ENSMUSG00000074887	EU599041	expressed sequence EU599041	cellular_component|	response to organic substance|response to retinoic acid|	molecular_function|metal ion binding|	8	1.3	6.57	8	1.9	10.3	1.6	15.6	0.00197	0.8	2.9	0	0	0
ENSMUSG00000028771	PTPN12	protein tyrosine phosphatase, non-receptor type 12	podosome|cytoplasm|cytosol|plasma membrane|cell junction|cell projection|	protein dephosphorylation|peptidyl-tyrosine dephosphorylation|peptidyl-tyrosine dephosphorylation|	non-membrane spanning protein tyrosine phosphatase activity|protein binding|SH3 domain binding|	9	2	9.8	9	2.7	7.12	2.1	15.6	0.00197	1.2	4	0	0	0
ENSMUSG00000014294	NDUFA2	NADH dehydrogenase (ubiquinone) 1 alpha subcomplex, 2, 8kDa	mitochondrial inner membrane|mitochondrial respiratory chain complex I|mitochondrial respiratory chain complex I|mitochondrial membrane|	mitochondrial electron transport, NADH to ubiquinone|respiratory electron transport chain|cellular metabolic process|small molecule metabolic process|	NADH dehydrogenase (ubiquinone) activity|	8	1.5	7.8	6	1.5	8.16	1.5	15.6	0.00197	0.8	3	0	0	0
ENSMUSG00000025135	ANAPC11	anaphase promoting complex subunit 11	nucleus|nucleoplasm|anaphase-promoting complex|nucleolus|cytosol|	mitotic cell cycle|mitotic nuclear division|mitotic spindle assembly checkpoint|protein ubiquitination|anaphase-promoting complex-dependent proteasomal ubiquitin-dependent protein catabolic process|negative regulation of ubiquitin-protein ligase activity involved in mitotic cell cycle|positive regulation of ubiquitin-protein ligase activity involved in mitotic cell cycle|regulation of ubiquitin-p…	ubiquitin-protein transferase activity|zinc ion binding|	8	2.7	4.66	5	1.9	11.6	1.9	15.6	0.00197	1	4	0	0	0
ENSMUSG00000021494	DDX41	DEAD (Asp-Glu-Ala-Asp) box polypeptide 41	endoplasmic reticulum|cytosol|membrane|catalytic step 2 spliceosome|	mRNA splicing, via spliceosome|RNA processing|apoptotic process|multicellular organismal development|regulation of type I interferon production|positive regulation of type I interferon production|cellular response to interferon-beta|innate immune response|positive regulation of transcription from RNA polymerase II promoter|defense response to virus|	DNA binding|helicase activity|protein binding|ATP binding|zinc ion binding|poly(A) RNA binding|	6	-1.3	2.05	8	3.1	17.5	3	15.6	0.00197	1.6	6	0	0	0
ENSMUSG00000059734	NDUFS8	NADH dehydrogenase (ubiquinone) Fe-S protein 8, 23kDa (NADH-coenzyme Q reductase)	mitochondrion|mitochondrial inner membrane|mitochondrial respiratory chain complex I|mitochondrial respiratory chain complex I|mitochondrial respiratory chain complex I|	mitochondrial electron transport, NADH to ubiquinone|response to oxidative stress|respiratory electron transport chain|mitochondrial respiratory chain complex I assembly|cellular metabolic process|small molecule metabolic process|	NADH dehydrogenase activity|NADH dehydrogenase (ubiquinone) activity|NADH dehydrogenase (ubiquinone) activity|metal ion binding|4 iron, 4 sulfur cluster binding|	6	1.4	6.2	5	1.6	9.76	1.5	15.5	0.002	0.9	2.6	0	0	0
ENSMUSG00000022565	PLEC	plectin	cytoplasm|cytosol|plasma membrane|focal adhesion|sarcoplasm|hemidesmosome|sarcolemma|costamere|intermediate filament cytoskeleton|extracellular vesicular exosome|	apoptotic process|cellular component disassembly involved in execution phase of apoptosis|extracellular matrix organization|hemidesmosome assembly|hemidesmosome assembly|cell junction assembly|	actin binding|protein binding|structural constituent of muscle|structural constituent of muscle|ankyrin binding|poly(A) RNA binding|	10	1.1	6.67	9	1.2	9.22	1.1	15.5	0.002	0.6	1.9	0	0	0
ENSMUSG00000006728	CDK4	cyclin-dependent kinase 4	cyclin-dependent protein kinase holoenzyme complex|chromatin|nucleus|nucleoplasm|transcription factor complex|nucleolus|cytosol|cytosol|tight junction|nuclear membrane|perinuclear region of cytoplasm|	G1/S transition of mitotic cell cycle|mitotic cell cycle|protein phosphorylation|signal transduction|circadian rhythm|positive regulation of cell proliferation|response to toxic substance|response to lead ion|regulation of gene expression|positive regulation of G2/M transition of mitotic cell cycle|organ regeneration|response to testosterone|response to drug|positive regulation of apoptotic proce…	cyclin-dependent protein serine/threonine kinase activity|protein binding|ATP binding|cyclin binding|protein complex binding|	6	2.2	13.5	8	1.1	4.12	2	15.5	0.002	1.1	3.5	0	0	0
ENSMUSG00000030447	CYFIP1	cytoplasmic FMR1 interacting protein 1	ruffle|mRNA cap binding complex|lamellipodium|cell junction|SCAR complex|neuron projection|synapse|perinuclear region of cytoplasm|extracellular vesicular exosome|	regulation of cell shape|Rac protein signal transduction|lamellipodium assembly|ruffle organization|axon extension|cognition|positive regulation of Arp2/3 complex-mediated actin nucleation|	protein binding|protein complex binding|protein complex binding|Rac GTPase binding|Rac GTPase binding|actin filament binding|	9	-2.1	17.3	10	-0.5	0.713	-1.9	15.4	0.00203	-3.8	-0.7	0	0	0
ENSMUSG00000056493	FOXK1	forkhead box K1	nucleus|nucleolus|	transcription, DNA-templated|regulation of transcription from RNA polymerase II promoter|muscle organ development|cell differentiation|negative regulation of cell growth|negative regulation of transcription, DNA-templated|positive regulation of transcription, DNA-templated|	sequence-specific DNA binding transcription factor activity|protein binding|sequence-specific DNA binding|	10	3	11	10	2.7	4.76	3	15.4	0.00203	1.4	4.7	0	0	0
ENSMUSG00000037463	FBXO27	F-box protein 27	SCF ubiquitin ligase complex|	None	glycoprotein binding|protein binding|	10	2.2	4.11	10	3.4	13.3	2.8	15.4	0.00203	1.5	5.3	0	0	0
ENSMUSG00000062542	SYT9	synaptotagmin IX	integral component of membrane|cell junction|secretory granule membrane|synaptic vesicle membrane|dense core granule|	transport|positive regulation of calcium ion-dependent exocytosis|regulation of insulin secretion|	transporter activity|identical protein binding|metal ion binding|	10	2.7	18.1	8	0.1	0.0992	2.6	15.4	0.00203	1.3	4.5	0	0	0
ENSMUSG00000022991	LALBA	lactalbumin, alpha-	extracellular space|	lactose biosynthetic process|apoptotic process|signal transduction|cell-cell signaling|defense response to bacterium|	lactose synthase activity|calcium ion binding|	10	2.3	16.5	10	0.7	2.13	2.2	15.4	0.00203	1	3.6	0	0	0
ENSMUSG00000029199	LIAS	lipoic acid synthetase	mitochondrion|	neural tube closure|inflammatory response|response to oxidative stress|lipoate biosynthetic process|protein lipoylation|response to lipopolysaccharide|	lipoate synthase activity|metal ion binding|4 iron, 4 sulfur cluster binding|	8	2.1	11.3	7	2	4.44	2.1	15.4	0.00203	0.9	3.5	0	0	0
ENSMUSG00000032080	APOA4	apolipoprotein A-IV	extracellular region|extracellular region|extracellular space|early endosome|endoplasmic reticulum lumen|cytosol|cell surface|very-low-density lipoprotein particle|high-density lipoprotein particle|chylomicron|extracellular vesicular exosome|blood microparticle|	retinoid metabolic process|innate immune response in mucosa|lipid transport|response to lipid hydroperoxide|leukocyte cell-cell adhesion|phototransduction, visible light|cholesterol metabolic process|positive regulation of cholesterol esterification|positive regulation of triglyceride catabolic process|removal of superoxide radicals|regulation of intestinal cholesterol absorption|regulation of ch…	lipid transporter activity|copper ion binding|lipid binding|antioxidant activity|cholesterol transporter activity|phosphatidylcholine binding|protein homodimerization activity|phosphatidylcholine-sterol O-acyltransferase activator activity|	8	3	8.7	10	1.3	12	1.4	15.4	0.00203	0.9	3.7	0	0	0
ENSMUSG00000002379	NDUFA11	NADH dehydrogenase (ubiquinone) 1 alpha subcomplex, 11, 14.7kDa	mitochondrion|mitochondrial inner membrane|mitochondrial respiratory chain complex I|integral component of membrane|	respiratory electron transport chain|cellular metabolic process|small molecule metabolic process|	None	7	2.2	6.5	7	1.9	9.4	2	15.4	0.00203	0.8	3.4	0	0	0
ENSMUSG00000068921	DAP3	death associated protein 3	nucleus|nucleolus|mitochondrion|mitochondrial ribosome|small ribosomal subunit|	apoptotic mitochondrial changes|apoptotic signaling pathway|	protein binding|poly(A) RNA binding|	10	2.1	7.91	9	1.3	8.64	1.7	15.3	0.00207	0.9	2.9	0	0	0
ENSMUSG00000024212	MLLT1	myeloid/lymphoid or mixed-lineage leukemia (trithorax homolog, Drosophila); translocated to, 1	nucleus|nucleolus|cytoplasm|	regulation of transcription, DNA-templated|transcription from RNA polymerase II promoter|negative regulation of protein kinase activity|	DNA binding|protein binding|	10	-1.4	9.95	10	-1.1	5.85	-1.2	15.3	0.00207	-2.3	-0.6	0	0	0
ENSMUSG00000031843	MPHOSPH6	M-phase phosphoprotein 6	nuclear exosome (RNase complex)|exosome (RNase complex)|exosome (RNase complex)|nucleus|nucleolus|cytoplasm|	mitotic M phase|maturation of 5.8S rRNA|	RNA binding|protein binding|	7	2.5	13.1	6	2.6	2.57	2.6	15.3	0.00207	1.7	4.5	0	0	0
ENSMUSG00000005871	APC	adenomatous polyposis coli	kinetochore|nucleus|cytoplasm|centrosome|cytosol|cytoplasmic microtubule|plasma membrane|plasma membrane|cell-cell adherens junction|tight junction|lateral plasma membrane|lamellipodium|beta-catenin destruction complex|ruffle membrane|microtubule plus-end|axonal growth cone|	mitotic cytokinesis|kidney development|hair follicle development|protein complex assembly|apoptotic process|cellular component disassembly involved in execution phase of apoptosis|cellular response to DNA damage stimulus|negative regulation of microtubule depolymerization|negative regulation of microtubule depolymerization|cell cycle arrest|metaphase/anaphase transition of mitotic cell cycle|mito…	protein binding|beta-catenin binding|microtubule binding|protein kinase regulator activity|protein kinase binding|gamma-catenin binding|microtubule plus-end binding|	10	1.9	8.36	10	1.6	7.43	1.8	15.3	0.00207	0.9	2.8	0	0	0
ENSMUSG00000027014	CWC22	CWC22 spliceosome-associated protein	nucleus|spliceosomal complex|cytoplasm|nuclear speck|catalytic step 2 spliceosome|	mRNA splicing, via spliceosome|regulation of mRNA splicing, via spliceosome|	RNA binding|protein binding|	7	3.4	8.23	8	2.1	9.03	2.6	15.3	0.00207	1.4	5.1	0	0	0
ENSMUSG00000031864	INTS10	integrator complex subunit 10	integrator complex|	snRNA processing|	protein binding|protein binding|	10	-1.5	11.3	9	-1.4	4.47	-1.5	15.3	0.00207	-2.4	-0.8	0	0	0
ENSMUSG00000022952	RUNX1	runt-related transcription factor 1	basement membrane|nucleus|nucleus|	skeletal system development|in utero embryonic development|liver development|myeloid progenitor cell differentiation|transcription, DNA-templated|central nervous system development|regulation of signal transduction|hemopoiesis|hemopoiesis|myeloid cell differentiation|negative regulation of granulocyte differentiation|positive regulation of granulocyte differentiation|hair follicle morphogenesis|e…	regulatory region DNA binding|DNA binding|sequence-specific DNA binding transcription factor activity|sequence-specific DNA binding transcription factor activity|calcium ion binding|protein binding|ATP binding|transcription factor binding|protein homodimerization activity|protein heterodimerization activity|repressing transcription factor binding|	6	1.5	3.28	7	-2.9	17.9	-2.8	15.2	0.0021	-6	-0.9	0	0	0
ENSMUSG00000035713	USP35	ubiquitin specific peptidase 35	None	ubiquitin-dependent protein catabolic process|protein deubiquitination|	ubiquitin-specific protease activity|	8	0.4	0.675	9	3.3	16.5	3.2	15.2	0.0021	1.4	5.6	0	0	0
ENSMUSG00000049792	BAG5	BCL2-associated athanogene 5	nucleus|membrane|inclusion body|perinuclear region of cytoplasm|	protein folding|negative regulation of protein ubiquitination|negative regulation of ubiquitin-protein transferase activity|negative regulation of protein refolding|neuron death|regulation of inclusion body assembly|	ubiquitin protein ligase binding|chaperone binding|	10	2	7.27	10	1.7	8.48	1.7	15.2	0.0021	1	3.4	0	0	0
ENSMUSG00000031828	KLHL36	kelch-like family member 36	None	protein ubiquitination|	None	10	1.9	12.3	9	2.4	3.61	2.1	15.2	0.0021	1	3.4	0	0	0
ENSMUSG00000042743	SGTB	small glutamine-rich tetratricopeptide repeat (TPR)-containing, beta	None	None	None	9	1.7	6.21	9	1.6	9.4	1.6	15.2	0.0021	0.9	2.7	0	0	0
ENSMUSG00000057522	SPOP	speckle-type POZ protein	nucleus|nuclear speck|Cul3-RING ubiquitin ligase complex|	protein ubiquitination|proteasome-mediated ubiquitin-dependent protein catabolic process|	protein binding|ubiquitin protein ligase binding|	10	-1.4	7.3	10	-1.4	8.23	-1.4	15.1	0.00213	-2.4	-0.6	0	0	0
ENSMUSG00000039740	ALG2	ALG2, alpha-1,3/1,6-mannosyltransferase	nucleus|cytoplasm|endoplasmic reticulum membrane|membrane|integral component of membrane|perinuclear region of cytoplasm|	dolichol-linked oligosaccharide biosynthetic process|dolichol-linked oligosaccharide biosynthetic process|protein N-linked glycosylation via asparagine|protein glycosylation in endoplasmic reticulum|post-translational protein modification|cellular protein metabolic process|response to calcium ion|mannosylation|mannosylation|	alpha-1,3-mannosyltransferase activity|GDP-Man:Man1GlcNAc2-PP-Dol alpha-1,3-mannosyltransferase activity|protein binding|glycolipid 6-alpha-mannosyltransferase activity|protein anchor|protein heterodimerization activity|protein N-terminus binding|calcium-dependent protein binding|calcium-dependent protein binding|	6	2.3	8.8	4	2.6	6.73	2.4	15.1	0.00213	1.3	4.3	0	0	0
ENSMUSG00000005610	EIF4G2	eukaryotic translation initiation factor 4 gamma, 2	cytosol|membrane|eukaryotic translation initiation factor 4F complex|	translational initiation|regulation of translational initiation|cell cycle arrest|cell death|cytokine-mediated signaling pathway|	translation initiation factor activity|protein binding|translation factor activity, nucleic acid binding|poly(A) RNA binding|	8	1.5	7.3	7	1.4	8.21	1.5	15.1	0.00213	0.7	2.6	0	0	0
ENSMUSG00000071713	CSF2RB	colony stimulating factor 2 receptor, beta, low-affinity (granulocyte-macrophage)	plasma membrane|integral component of plasma membrane|granulocyte macrophage colony-stimulating factor receptor complex|	signal transduction|respiratory gaseous exchange|response to lipopolysaccharide|cellular response to interleukin-3|interleukin-5-mediated signaling pathway|interleukin-3-mediated signaling pathway|	receptor activity|interleukin-3 receptor activity|interleukin-5 receptor activity|protein binding|	9	2.1	6.17	8	2.3	9.39	2.2	15.1	0.00213	1	3.7	0	0	0
ENSMUSG00000055991	ZKSCAN5	zinc finger with KRAB and SCAN domains 5	nucleus|	transcription, DNA-templated|regulation of transcription, DNA-templated|	DNA binding|sequence-specific DNA binding transcription factor activity|protein binding|zinc ion binding|	10	-3	16.4	10	-0.9	0.579	-2.7	15.1	0.00213	-5.6	-1	0	0	0
ENSMUSG00000087153	GM6483	cadherin 11 pseudogene	membrane|integral component of membrane|	None	None	9	1.6	7.71	9	2.6	8.33	1.7	15.1	0.00213	1	3.5	0	0	0
ENSMUSG00000012483	RPA3	replication protein A3, 14kDa	nucleoplasm|DNA replication factor A complex|	G1/S transition of mitotic cell cycle|mitotic cell cycle|nucleotide-excision repair, DNA damage removal|telomere maintenance via recombination|telomere maintenance|double-strand break repair via homologous recombination|double-strand break repair via homologous recombination|DNA recombinase assembly|DNA replication|DNA replication|DNA strand elongation involved in DNA replication|DNA repair|trans…	damaged DNA binding|single-stranded DNA binding|protein binding|	6	2.2	12.7	3	1.4	3.55	2.1	15.1	0.00213	1	3.6	0	0	0
ENSMUSG00000039427	ALG1	ALG1, chitobiosyldiphosphodolichol beta-mannosyltransferase	endoplasmic reticulum|endoplasmic reticulum membrane|membrane|integral component of membrane|	protein glycosylation|dolichol-linked oligosaccharide biosynthetic process|lipopolysaccharide biosynthetic process|protein N-linked glycosylation via asparagine|post-translational protein modification|cellular protein metabolic process|mannosylation|mannosylation|	mannosyltransferase activity|chitobiosyldiphosphodolichol beta-mannosyltransferase activity|	8	1	2.26	8	1.7	14.4	1.6	15.1	0.00213	0.8	2.9	0	0	0
ENSMUSG00000030224	STRAP	serine/threonine kinase receptor associated protein	nucleus|cytoplasm|cytosol|cytosol|plasma membrane|cell junction|SMN complex|SMN-Sm protein complex|	negative regulation of transcription from RNA polymerase II promoter|spliceosomal snRNP assembly|transforming growth factor beta receptor signaling pathway|negative regulation of epithelial cell migration|negative regulation of epithelial to mesenchymal transition|maintenance of gastrointestinal epithelium|negative regulation of transforming growth factor beta receptor signaling pathway|negative …	receptor binding|protein binding|poly(A) RNA binding|	7	2.2	16.7	3	0	0	2.2	15.1	0.00213	1.2	4.2	0	0	0
ENSMUSG00000034424	GCSH	glycine cleavage system protein H (aminomethyl carrier)	mitochondrion|glycine cleavage complex|	glycine catabolic process|glycine decarboxylation via glycine cleavage system|methylation|methylation|	aminomethyltransferase activity|enzyme binding|	9	2.2	7.65	8	1.4	8.62	1.8	15.1	0.00213	0.9	3.1	0	0	0
ENSMUSG00000027423	SNX5	sorting nexin 5	ruffle|phagocytic cup|cytoplasmic vesicle membrane|extrinsic component of cytoplasmic side of plasma membrane|extrinsic component of endosome membrane|early endosome membrane|macropinocytic cup|	intracellular protein transport|pinocytosis|	phosphatidylinositol binding|phosphatidylinositol binding|	7	3.4	17.8	9	0.3	0.0474	3.3	15	0.00216	1.7	6.1	0	0	0
ENSMUSG00000027108	OLA1	Obg-like ATPase 1	nucleolus|cytoplasm|membrane|extracellular vesicular exosome|	ATP catabolic process|	protein binding|ATP binding|GTP binding|ATPase activity|ribosome binding|ribosomal large subunit binding|metal ion binding|	10	1.4	7.66	9	3.3	9.75	1.6	15	0.00216	0.9	4	0	0	0
ENSMUSG00000011752	PGAM1	phosphoglycerate mutase 1 (brain)	cytoplasm|cytosol|cytosol|membrane|extracellular vesicular exosome|	carbohydrate metabolic process|glucose metabolic process|gluconeogenesis|glycolytic process|glycolytic process|regulation of glycolytic process|dephosphorylation|regulation of pentose-phosphate shunt|small molecule metabolic process|respiratory burst|	bisphosphoglycerate mutase activity|bisphosphoglycerate 2-phosphatase activity|phosphoglycerate mutase activity|phosphoglycerate mutase activity|phosphoglycerate mutase activity|protein binding|protein kinase binding|	8	2.2	8.74	7	1.5	7.12	2	15	0.00216	0.9	3.4	0	0	0
ENSMUSG00000024943	SMC5	structural maintenance of chromosomes 5	chromosome, telomeric region|nucleus|nucleus|PML body|cell junction|Smc5-Smc6 complex|	telomere maintenance via recombination|double-strand break repair via homologous recombination|mitotic nuclear division|positive regulation of maintenance of mitotic sister chromatid cohesion|positive regulation of mitotic metaphase/anaphase transition|cellular senescence|	protein binding|ATP binding|	8	2.6	9.73	9	2.4	5.64	2.5	15	0.00216	1.2	4.1	0	0	0
ENSMUSG00000054520	SH3BP2	SH3-domain binding protein 2	None	signal transduction|positive regulation of signal transduction|	SH3/SH2 adaptor activity|protein binding|SH3 domain binding|	10	-2.8	17.2	10	-0.4	0.392	-1.4	15	0.00216	-5.3	-0.7	0	0	0
ENSMUSG00000096594	IGKV8-19	immunoglobulin kappa variable 8-19	None	None	None	10	1.9	12	10	2.2	3.48	2.1	14.9	0.0022	1	3.4	0	0	0
ENSMUSG00000076694	IGHV1-30	immunoglobulin heavy variable 1-30	None	None	None	9	1.5	9.61	8	2.1	6.54	1.8	14.9	0.0022	0.9	3.1	0	0	0
ENSMUSG00000002963	PNKP	polynucleotide kinase 3'-phosphatase	nucleus|nucleolus|membrane|	nucleotide-excision repair, DNA damage removal|DNA-dependent DNA replication|DNA repair|response to oxidative stress|response to radiation|response to radiation|dephosphorylation|DNA damage response, detection of DNA damage|DNA damage response, detection of DNA damage|nucleotide phosphorylation|nucleic acid phosphodiester bond hydrolysis|polynucleotide 3' dephosphorylation|polynucleotide 3' depho…	damaged DNA binding|double-stranded DNA binding|endonuclease activity|protein binding|ATP binding|purine nucleotide binding|nucleotide kinase activity|polynucleotide 3'-phosphatase activity|ATP-dependent polydeoxyribonucleotide 5'-hydroxyl-kinase activity|	7	1.5	6.15	4	1.7	9.12	1.6	14.9	0.0022	0.9	3.1	0	0	0
ENSMUSG00000040455	USP45	ubiquitin specific peptidase 45	None	ubiquitin-dependent protein catabolic process|protein deubiquitination|	ubiquitin-specific protease activity|zinc ion binding|	10	1.2	4.09	10	3	13	2.5	14.9	0.0022	0.8	4.2	0	0	0
ENSMUSG00000035401	2210018M11RIK	RIKEN cDNA 2210018M11 gene	nucleus|	DNA repair|transcription, DNA-templated|regulation of transcription, DNA-templated|cellular response to DNA damage stimulus|chromatin modification|	protein binding|protein homodimerization activity|	8	1.8	8.85	9	1.2	7.32	1.4	14.9	0.0022	0.8	2.6	0	0	0
ENSMUSG00000079637	RHOX2C	reproductive homeobox 2C	cellular_component|nucleus|	biological_process|	DNA binding|	9	2.2	16.8	9	-2	0.832	2.2	14.9	0.0022	1.2	4.5	0	0	0
ENSMUSG00000028982	SLC25A33	solute carrier family 25 (pyrimidine nucleotide carrier), member 33	mitochondrial inner membrane|integral component of membrane|	transport|	None	9	1.7	5.61	7	2.4	10.4	2.1	14.9	0.0022	1.2	3.8	0	0	0
ENSMUSG00000034807	COLGALT1	collagen beta(1-O)galactosyltransferase 1	endoplasmic reticulum lumen|endoplasmic reticulum lumen|membrane|	lipopolysaccharide biosynthetic process|extracellular matrix organization|	procollagen galactosyltransferase activity|	10	1.4	4.45	10	2.8	11	2.7	14.9	0.0022	0.9	4.2	0	0	0
ENSMUSG00000033228	SCAF11	SR-related CTD-associated factor 11	nucleus|nucleolus|	spliceosomal complex assembly|RNA splicing, via transesterification reactions|mRNA processing|RNA splicing|	protein binding|zinc ion binding|poly(A) RNA binding|	9	1.4	3.37	10	2.4	12	2.3	14.8	0.00225	1.3	3.8	0	0	0
ENSMUSG00000031165	WAS	Wiskott-Aldrich syndrome	cytosol|vesicle membrane|actin cytoskeleton|extracellular vesicular exosome|	protein complex assembly|defense response|immune response|blood coagulation|actin polymerization or depolymerization|epidermis development|endosomal transport|actin filament polymerization|actin filament-based movement|Fc-gamma receptor signaling pathway involved in phagocytosis|T cell activation|innate immune response|regulation of catalytic activity|T cell receptor signaling pathway|positive re…	actin binding|small GTPase regulator activity|protein binding|identical protein binding|	10	-1.9	9.67	10	-1.1	6.05	-1.4	14.8	0.00225	-3	-0.6	0	0	0
ENSMUSG00000039157	FAM102A	family with sequence similarity 102, member A	None	None	None	9	1.2	7.79	9	1.2	7.41	1.2	14.8	0.00225	0.7	2.3	0	0	0
ENSMUSG00000044122	PROCA1	protein interacting with cyclin A1	None	lipid catabolic process|	phospholipase A2 activity|calcium ion binding|	10	2.1	8.3	10	1.7	7.11	1.9	14.8	0.00225	1	3.2	0	0	0
ENSMUSG00000022553	MAF1	MAF1 homolog (S. cerevisiae)	intracellular|nucleus|cytoplasm|cytosol|plasma membrane|axon|dendrite|inhibitory synapse|	transcription, DNA-templated|negative regulation of transcription from RNA polymerase III promoter|	RNA polymerase III type 1 promoter DNA binding|RNA polymerase III type 2 promoter DNA binding|RNA polymerase III type 3 promoter DNA binding|	8	3.4	13	8	2.1	3.48	3.3	14.8	0.00225	1.7	5.8	0	0	0
ENSMUSG00000022057	ADAMDEC1	ADAM-like, decysin 1	cellular_component|extracellular region|	proteolysis|immune response|negative regulation of cell adhesion|	metalloendopeptidase activity|zinc ion binding|	10	1.5	4.33	10	2.6	11.5	2.5	14.8	0.00225	1.2	4.2	0	0	0
ENSMUSG00000068452	DUOX2	dual oxidase 2	integral component of membrane|apical plasma membrane|extracellular vesicular exosome|	thyroid hormone generation|fertilization|response to virus|cytokine-mediated signaling pathway|cytokine-mediated signaling pathway|bone mineralization|thyroid gland development|multicellular organism growth|cuticle development|hormone biosynthetic process|hydrogen peroxide catabolic process|inner ear development|adenohypophysis morphogenesis|response to cAMP|response to cAMP|oxidation-reduction p…	peroxidase activity|calcium ion binding|NAD(P)H oxidase activity|heme binding|	9	2.4	6.12	9	1.7	9.91	2.2	14.8	0.00225	0.9	3.4	0	0	0
ENSMUSG00000090627	GM8356	N/A	None	None	None	7	1.6	2.02	8	2.7	14.3	2.4	14.8	0.00225	1.2	4.2	0	0	0
ENSMUSG00000059089	FCGR4	Fc receptor, IgG, low affinity IV	external side of plasma membrane|cell surface|membrane|integral component of membrane|extracellular vesicular exosome|	NK T cell proliferation|regulation of sensory perception of pain|cellular response to lipopolysaccharide|	None	10	1.5	5.4	9	1.7	9.84	1.5	14.7	0.00228	0.7	2.6	0	0	0
ENSMUSG00000020720	PSMD12	proteasome (prosome, macropain) 26S subunit, non-ATPase, 12	nucleoplasm|cytosol|proteasome regulatory particle|membrane|proteasome accessory complex|extracellular vesicular exosome|	G1/S transition of mitotic cell cycle|protein polyubiquitination|mitotic cell cycle|antigen processing and presentation of peptide antigen via MHC class I|antigen processing and presentation of exogenous peptide antigen via MHC class I, TAP-dependent|regulation of cellular amino acid metabolic process|apoptotic process|DNA damage response, signal transduction by p53 class mediator resulting in ce…	None	3	2.3	8.49	5	1.9	6.62	2.2	14.7	0.00228	1.1	4.2	0	0	0
ENSMUSG00000033368	TRIM69	tripartite motif containing 69	nucleus|cytoplasm|nuclear speck|	apoptotic process|protein ubiquitination|	ubiquitin-protein transferase activity|zinc ion binding|ligase activity|	9	1.3	7.08	9	2.2	8.79	2.1	14.7	0.00228	0.8	3.3	0	0	0
ENSMUSG00000024480	AP3S1	adaptor-related protein complex 3, sigma 1 subunit	Golgi apparatus|AP-type membrane coat adaptor complex|AP-3 adaptor complex|transport vesicle|cytoplasmic vesicle membrane|	intracellular protein transport|anterograde axon cargo transport|insulin receptor signaling pathway|anterograde synaptic vesicle transport|	transporter activity|protein binding|protein transporter activity|	8	1.6	6.94	10	1.8	8.35	1.7	14.7	0.00228	1	3	0	0	0
ENSMUSG00000031255	SYTL4	synaptotagmin-like 4	nucleus|cytoplasm|endosome|centrosome|plasma membrane|synaptic vesicle|extrinsic component of membrane|secretory granule|transport vesicle membrane|	intracellular protein transport|exocytosis|positive regulation of exocytosis|negative regulation of insulin secretion|positive regulation of protein secretion|multivesicular body sorting pathway|	transporter activity|phospholipid binding|zinc ion binding|Rab GTPase binding|neurexin family protein binding|	10	1.7	4.13	10	3	11.5	1.8	14.7	0.00228	1	4.3	0	0	0
ENSMUSG00000025264	TSR2	TSR2, 20S rRNA accumulation, homolog (S. cerevisiae)	None	rRNA processing|	protein binding|	6	1.3	4.29	8	1.4	10.8	1.3	14.7	0.00228	0.8	2.4	0	0	0
ENSMUSG00000026087	MRPL30	mitochondrial ribosomal protein L30	mitochondrion|ribosome|	None	None	10	1.8	8.12	10	1.7	6.95	1.7	14.7	0.00228	1	2.8	0	0	0
ENSMUSG00000025044	MSR1	macrophage scavenger receptor 1	collagen trimer|cytosol|plasma membrane|integral component of plasma membrane|endocytic vesicle membrane|low-density lipoprotein particle|	receptor-mediated endocytosis|positive regulation of macrophage derived foam cell differentiation|positive regulation of cholesterol storage|cholesterol transport|plasma lipoprotein particle clearance|lipoprotein transport|	scavenger receptor activity|protein binding|low-density lipoprotein particle binding|	10	1.4	5.51	10	1.1	9.65	1.3	14.6	0.00232	0.6	2.6	0	0	0
ENSMUSG00000006386	TEK	TEK tyrosine kinase, endothelial	stress fiber|extracellular region|cytoplasm|actin filament|plasma membrane|integral component of plasma membrane|microvillus|cell-cell junction|focal adhesion|basal plasma membrane|cell surface|basolateral plasma membrane|apical plasma membrane|membrane raft|	angiogenesis|response to hypoxia|positive regulation of protein phosphorylation|positive regulation of protein phosphorylation|endothelial cell proliferation|positive regulation of endothelial cell proliferation|endochondral ossification|sprouting angiogenesis|cell-matrix adhesion|signal transduction|transmembrane receptor protein tyrosine kinase signaling pathway|cell-cell signaling|heart develo…	protein kinase activity|protein tyrosine kinase activity|protein tyrosine kinase activity|transmembrane receptor protein tyrosine kinase activity|receptor activity|protein binding|ATP binding|growth factor binding|	9	2.3	14.6	8	1.4	1.58	1.6	14.6	0.00232	0.9	3.5	0	0	0
ENSMUSG00000078941	TAF9	TAF9 RNA polymerase II, TATA box binding protein (TBP)-associated factor, 32kDa	PCAF complex|nucleoplasm|transcription factor TFIID complex|STAGA complex|transcription factor TFTC complex|pre-snoRNP complex|MLL1 complex|	chromatin organization|transcription from RNA polymerase II promoter|transcription initiation from RNA polymerase II promoter|transcription elongation from RNA polymerase II promoter|cellular response to DNA damage stimulus|gene expression|viral process|positive regulation of cell growth|negative regulation of proteasomal ubiquitin-dependent protein catabolic process|negative regulation of apopto…	p53 binding|DNA binding|transcription coactivator activity|transcription coactivator activity|histone acetyltransferase activity|protein binding|activating transcription factor binding|transcription regulatory region DNA binding|protein heterodimerization activity|C2H2 zinc finger domain binding|	8	1.7	3.97	10	1.8	11	1.7	14.6	0.00232	0.9	3.2	0	0	0
ENSMUSG00000040028	ELAVL1	ELAV like RNA binding protein 1	nucleus|nucleoplasm|cytoplasm|cytosol|membrane|	multicellular organismal development|gene expression|RNA metabolic process|mRNA metabolic process|positive regulation of translation|mRNA stabilization|mRNA stabilization|3'-UTR-mediated mRNA stabilization|3'-UTR-mediated mRNA stabilization|regulation of stem cell maintenance|	nucleotide binding|RNA binding|double-stranded RNA binding|mRNA binding|mRNA 3'-UTR binding|protein binding|AU-rich element binding|protein kinase binding|mRNA 3'-UTR AU-rich region binding|poly(A) RNA binding|	8	-1.5	16.1	8	-0.4	0.611	-1.5	14.6	0.00232	-2.6	-0.7	0	0	0
ENSMUSG00000005262	UFD1L	ubiquitin fusion degradation 1 like (yeast)	nucleus|cytosol|	skeletal system development|ubiquitin-dependent protein catabolic process|proteasome-mediated ubiquitin-dependent protein catabolic process|	ubiquitin-specific protease activity|receptor binding|protein binding|protein complex binding|	9	2.5	12	8	1.3	4.83	1.5	14.6	0.00232	0.9	3.4	0	0	0
ENSMUSG00000036449	LCN8	lipocalin 8	extracellular region|	transport|response to hormone|	None	9	1.9	8.9	9	2.7	6.64	1.9	14.5	0.00237	0.9	3.8	0	0	0
ENSMUSG00000025613	CCT8	chaperonin containing TCP1, subunit 8 (theta)	zona pellucida receptor complex|cytoplasm|centrosome|cytosol|cytosol|chaperonin-containing T-complex|microtubule|aggresome|cell body|intermediate filament cytoskeleton|extracellular vesicular exosome|	ATP catabolic process|protein folding|binding of sperm to zona pellucida|cellular protein metabolic process|'de novo' posttranslational protein folding|	ATP binding|ATPase activity, coupled|unfolded protein binding|	6	1.6	8.09	6	1.1	7.33	1.5	14.5	0.00237	0.8	2.6	0	0	0
ENSMUSG00000018160	MED1	mediator complex subunit 1	chromatin|nucleus|nucleoplasm|nucleolus|membrane|mediator complex|mediator complex|protein-DNA complex|	negative regulation of transcription from RNA polymerase II promoter|cell morphogenesis|angiogenesis|liver development|embryonic placenta development|lens development in camera-type eye|thyroid hormone mediated signaling pathway|ventricular trabecula myocardium morphogenesis|retinal pigment epithelium development|DNA replication|regulation of transcription from RNA polymerase I promoter|transcrip…	RNA polymerase II core promoter proximal region sequence-specific DNA binding|sequence-specific DNA binding RNA polymerase II transcription factor activity|core promoter binding|RNA polymerase II transcription cofactor activity|chromatin binding|transcription cofactor activity|transcription coactivator activity|transcription coactivator activity|receptor activity|protein binding|transcription fac…	7	2	6.46	6	1.6	8.85	1.7	14.5	0.00237	0.9	3.1	0	0	0
ENSMUSG00000032463	FAIM	Fas apoptotic inhibitory molecule	cytoplasm|	apoptotic process|negative regulation of apoptotic process|negative regulation of extrinsic apoptotic signaling pathway via death domain receptors|	None	10	1.4	2.57	10	2.2	13	2	14.5	0.00237	1	3.4	0	0	0
ENSMUSG00000003283	HCK	HCK proto-oncogene, Src family tyrosine kinase	nucleus|lysosome|Golgi apparatus|cytosol|actin filament|caveola|focal adhesion|transport vesicle|extrinsic component of cytoplasmic side of plasma membrane|cell projection|	leukocyte migration involved in immune response|innate immune response-activating signal transduction|protein phosphorylation|inflammatory response|cell adhesion|integrin-mediated signaling pathway|mesoderm development|positive regulation of cell proliferation|regulation of cell shape|viral process|peptidyl-tyrosine phosphorylation|cytokine-mediated signaling pathway|positive regulation of actin …	protein tyrosine kinase activity|non-membrane spanning protein tyrosine kinase activity|protein binding|ATP binding|	10	1.9	8.47	10	1.5	6.51	1.8	14.5	0.00237	1	2.9	0	0	0
ENSMUSG00000075284	WIPF1	WAS/WASL interacting protein family, member 1	ruffle|cytosol|actin filament|actin cytoskeleton|cytoplasmic membrane-bounded vesicle|	protein complex assembly|actin polymerization or depolymerization|actin filament-based movement|Fc-gamma receptor signaling pathway involved in phagocytosis|innate immune response|response to other organism|	actin binding|protein binding|profilin binding|	10	-1	3.92	10	-1.8	12.2	-1.5	14.5	0.00237	-2.7	-0.7	0	0	0
ENSMUSG00000060121	GEMIN2	gem (nuclear organelle) associated protein 2	nucleus|nucleoplasm|spliceosomal complex|nucleolus|cytoplasm|cytosol|cytosol|SMN complex|SMN-Sm protein complex|Gemini of coiled bodies|	spliceosomal complex assembly|RNA splicing, via transesterification reactions|spliceosomal snRNP assembly|spliceosomal snRNP assembly|mRNA processing|RNA splicing|gene expression|RNA metabolic process|ncRNA metabolic process|	protein binding|	8	1.8	10.7	8	1.3	4.52	1.7	14.5	0.00237	0.9	2.9	0	0	0
ENSMUSG00000016554	EIF3D	eukaryotic translation initiation factor 3, subunit D	cytosol|eukaryotic translation initiation factor 3 complex|membrane|eukaryotic 43S preinitiation complex|eukaryotic 48S preinitiation complex|	formation of translation preinitiation complex|formation of translation initiation complex|translation|translational initiation|translational initiation|translational initiation|regulation of translational initiation|gene expression|cellular protein metabolic process|	translation initiation factor activity|translation initiation factor activity|protein binding|poly(A) RNA binding|	8	3.2	7.87	9	1.7	7.9	1.8	14.4	0.00241	1	4	0	0	0
ENSMUSG00000024789	JAK2	Janus kinase 2	nucleus|cytoplasm|cytosol|cytoskeleton|caveola|nuclear matrix|endosome lumen|membrane raft|	activation of MAPKK activity|protein phosphorylation|apoptotic process|activation of cysteine-type endopeptidase activity involved in apoptotic process|cellular component movement|signal transduction|enzyme linked receptor protein signaling pathway|G-protein coupled receptor signaling pathway|positive regulation of cytosolic calcium ion concentration|JAK-STAT cascade|tyrosine phosphorylation of S…	protein kinase activity|protein tyrosine kinase activity|protein tyrosine kinase activity|protein tyrosine kinase activity|non-membrane spanning protein tyrosine kinase activity|receptor binding|growth hormone receptor binding|interleukin-12 receptor binding|protein binding|ATP binding|protein C-terminus binding|protein kinase binding|heme binding|type 1 angiotensin receptor binding|acetylcholine…	8	1.1	3.65	10	1.6	11.7	1.5	14.4	0.00241	0.7	2.8	0	0	0
ENSMUSG00000026510	TRP53BP2	transformation related protein 53 binding protein 2	nucleus|cytoplasm|perinuclear region of cytoplasm|	apoptotic process|cell cycle|central nervous system development|heart development|embryo development ending in birth or egg hatching|response to ionizing radiation|intrinsic apoptotic signaling pathway by p53 class mediator|	SH3 domain binding|identical protein binding|NF-kappaB binding|	10	-0.6	1.04	9	2.9	17.4	2.8	14.4	0.00241	1.8	5.4	0	0	0
ENSMUSG00000021448	SHC3	SHC (Src homology 2 domain containing) transforming protein 3	cellular_component|cytosol|	transmembrane receptor protein tyrosine kinase signaling pathway|epidermal growth factor receptor signaling pathway|Ras protein signal transduction|central nervous system development|learning or memory|insulin receptor signaling pathway|synaptic transmission, glutamatergic|neurotrophin TRK receptor signaling pathway|	signal transducer activity|protein binding|	10	3	14	10	1.2	4.38	2.9	14.4	0.00241	1.1	4.3	0	0	0
ENSMUSG00000025468	CALY	calcyon neuron-specific vesicular protein	integral component of plasma membrane|cytoplasmic vesicle membrane|cytoplasmic vesicle|	endocytosis|dopamine receptor signaling pathway|positive regulation of endocytosis|clathrin coat assembly|	clathrin light chain binding|protein complex binding|	10	2.2	1.25	10	1.6	13.7	1.6	14.4	0.00241	0.9	3	0	0	0
ENSMUSG00000055900	TMEM69	transmembrane protein 69	integral component of membrane|	None	None	10	2.2	13.2	9	0.9	3.27	1.7	14.4	0.00241	0.9	3.3	0	0	0
ENSMUSG00000034022	CPSF1	cleavage and polyadenylation specific factor 1, 160kDa	nucleoplasm|mRNA cleavage and polyadenylation specificity factor complex|	mRNA splicing, via spliceosome|transcription from RNA polymerase II promoter|termination of RNA polymerase II transcription|mRNA polyadenylation|mRNA cleavage|mRNA export from nucleus|RNA splicing|gene expression|mRNA 3'-end processing|	mRNA 3'-UTR binding|protein binding|	9	1.9	13	7	2.3	1.74	1.9	14.3	0.00244	1	3.5	0	0	0
ENSMUSG00000028821	SYF2	SYF2 pre-mRNA-splicing factor	nucleus|nucleus|catalytic step 2 spliceosome|	mRNA splicing, via spliceosome|in utero embryonic development|gastrulation|embryonic organ development|	poly(A) RNA binding|	10	1.7	8.78	10	2.6	6.22	1.6	14.3	0.00244	0.8	3.3	0	0	0
ENSMUSG00000031546	GINS4	GINS complex subunit 4 (Sld5 homolog)	nucleoplasm|cytoplasm|	mitotic cell cycle|DNA strand elongation involved in DNA replication|	protein binding|	7	1.1	4.02	9	2.3	10.8	1.9	14.3	0.00244	0.8	3.4	0	0	0
ENSMUSG00000007564	PPP2R1A	protein phosphatase 2, regulatory subunit A, alpha	protein phosphatase type 2A complex|protein phosphatase type 2A complex|chromosome, centromeric region|nucleus|mitochondrion|cytosol|microtubule cytoskeleton|membrane|	G2/M transition of mitotic cell cycle|nuclear-transcribed mRNA catabolic process, nonsense-mediated decay|inactivation of MAPK activity|mitotic cell cycle|regulation of DNA replication|regulation of transcription, DNA-templated|protein complex assembly|protein dephosphorylation|ceramide metabolic process|apoptotic process|chromosome segregation|mitotic nuclear envelope reassembly|RNA splicing|fib…	antigen binding|protein serine/threonine phosphatase activity|protein binding|protein phosphatase type 2A regulator activity|protein heterodimerization activity|	7	1.8	7.96	5	1.9	6.69	1.8	14.3	0.00244	1	3.4	0	0	0
ENSMUSG00000038845	PHB	prohibitin	nucleus|nucleus|nucleoplasm|cytoplasm|mitochondrion|mitochondrial inner membrane|integral component of plasma membrane|membrane|extracellular vesicular exosome|	negative regulation of transcription from RNA polymerase II promoter|osteoblast differentiation|DNA replication|regulation of transcription, DNA-templated|transcription from RNA polymerase II promoter|signal transduction|negative regulation of cell proliferation|negative regulation of transcription by competitive promoter binding|histone deacetylation|negative regulation of cell growth|regulation…	sequence-specific DNA binding RNA polymerase II transcription factor activity|protein binding|enzyme binding|histone deacetylase binding|transcription regulatory region DNA binding|	5	1.5	7.4	6	1.9	7.63	1.7	14.2	0.00248	0.9	3.5	0	0	0
ENSMUSG00000026662	SEPHS1	selenophosphate synthetase 1	cytoplasm|cytoplasm|plasma membrane|plasma membrane|nuclear membrane|nuclear membrane|	cellular protein modification process|phosphorylation|	selenide, water dikinase activity|protein binding|ATP binding|GTP binding|protein homodimerization activity|protein heterodimerization activity|	10	0.8	2.68	10	1.8	12.6	1.8	14.2	0.00248	0.8	3.1	0	0	0
ENSMUSG00000054717	HMGB2	high mobility group box 2	condensed chromosome|extracellular space|nucleus|nucleoplasm|cytoplasm|protein complex|perinuclear region of cytoplasm|	positive regulation of endothelial cell proliferation|DNA topological change|base-excision repair, DNA ligation|apoptotic DNA fragmentation|chromatin organization|nucleosome assembly|regulation of transcription from RNA polymerase II promoter|apoptotic process|cellular component disassembly involved in execution phase of apoptosis|spermatid nucleus differentiation|male gonad development|positive …	DNA binding|damaged DNA binding|double-stranded DNA binding|single-stranded DNA binding|sequence-specific DNA binding transcription factor activity|protein binding|DNA binding, bending|protein domain specific binding|chemoattractant activity|transcription regulatory region DNA binding|poly(A) RNA binding|RAGE receptor binding|	7	2.9	6.36	8	2.1	8.85	2.1	14.2	0.00248	1.2	4.1	0	0	0
ENSMUSG00000017418	ARL5B	ADP-ribosylation factor-like 5B	intracellular|	small GTPase mediated signal transduction|	GTP binding|	10	0.8	1.61	10	2.6	13.1	2.6	14.1	0.00253	1.2	4.2	0	0	0
ENSMUSG00000026582	SELE	selectin E	extracellular space|plasma membrane|caveola|coated pit|integral component of membrane|cortical cytoskeleton|membrane raft|perinuclear region of cytoplasm|	positive regulation of receptor internalization|leukocyte migration involved in inflammatory response|positive regulation of leukocyte migration|inflammatory response|heterophilic cell-cell adhesion|leukocyte cell-cell adhesion|activation of phospholipase C activity|blood coagulation|calcium-mediated signaling|actin filament-based process|response to lipopolysaccharide|response to tumor necrosis …	transmembrane signaling receptor activity|protein binding|sialic acid binding|phospholipase binding|oligosaccharide binding|	9	2.6	7.49	8	1.9	7.62	2.3	14.1	0.00253	1	3.9	0	0	0
ENSMUSG00000027680	FXR1	fragile X mental retardation, autosomal homolog 1	nucleolus|cytoplasm|polysome|membrane|costamere|	apoptotic process|muscle organ development|negative regulation of translation|cell differentiation|	G-quadruplex RNA binding|RNA binding|mRNA 3'-UTR binding|poly(A) RNA binding|	9	2.1	4.83	10	-2.5	17.3	-2.5	14.1	0.00253	-5	-1.3	0	0	0
ENSMUSG00000029670	ING3	inhibitor of growth family, member 3	Swr1 complex|nucleus|nucleoplasm|nucleolus|cytoplasm|Piccolo NuA4 histone acetyltransferase complex|NuA4 histone acetyltransferase complex|	chromatin organization|transcription, DNA-templated|regulation of transcription, DNA-templated|regulation of growth|positive regulation of apoptotic process|histone H4 acetylation|histone H2A acetylation|	histone acetyltransferase activity|zinc ion binding|methylated histone binding|	9	1	4.82	9	2.4	10.5	2.3	14.1	0.00253	0.8	3.6	0	0	0
ENSMUSG00000024121	ATP6V0C	ATPase, H+ transporting, lysosomal 16kDa, V0 subunit c	lysosomal membrane|endosome membrane|integral component of membrane|phagocytic vesicle membrane|proton-transporting V-type ATPase, V0 domain|extracellular vesicular exosome|	cellular iron ion homeostasis|insulin receptor signaling pathway|ATP hydrolysis coupled proton transport|proton transport|viral process|positive regulation of Wnt signaling pathway|transferrin transport|interaction with host|transmembrane transport|phagosome maturation|	protein binding|ubiquitin protein ligase binding|proton-transporting ATP synthase activity, rotational mechanism|proton-transporting ATPase activity, rotational mechanism|	7	2	4.7	8	1.7	9.83	1.7	14	0.00258	1	3.2	0	0	0
ENSMUSG00000022358	FBXO32	F-box protein 32	nucleolus|Z disc|	response to denervation involved in regulation of muscle adaptation|protein ubiquitination|	protein binding|	10	0.9	3.84	9	1.9	12.2	1.7	14	0.00258	0.7	2.9	0	0	0
ENSMUSG00000039515	PPP2R4	protein phosphatase 2A activator, regulatory subunit 4	protein phosphatase type 2A complex|nucleus|cytoplasm|calcium channel complex|extracellular vesicular exosome|	protein peptidyl-prolyl isomerization|protein peptidyl-prolyl isomerization|ATP catabolic process|protein folding|mitotic spindle organization in nucleus|negative regulation of phosphoprotein phosphatase activity|positive regulation of phosphoprotein phosphatase activity|positive regulation of protein dephosphorylation|negative regulation of protein dephosphorylation|positive regulation of apopto…	peptidyl-prolyl cis-trans isomerase activity|receptor binding|ATP binding|protein tyrosine phosphatase activator activity|protein phosphatase type 2A regulator activity|protein phosphatase type 2A regulator activity|ATPase activity|protein homodimerization activity|protein heterodimerization activity|protein phosphatase 2A binding|	10	2.8	11	9	1.5	5.77	2.3	14	0.00258	1.1	4.1	0	0	0
ENSMUSG00000024896	MINPP1	multiple inositol-polyphosphate phosphatase 1	endoplasmic reticulum|endoplasmic reticulum lumen|extracellular vesicular exosome|	ossification|polyphosphate metabolic process|dephosphorylation|dephosphorylation|dephosphorylation|bone mineralization|inositol phosphate metabolic process|small molecule metabolic process|	acid phosphatase activity|phosphohistidine phosphatase activity|bisphosphoglycerate 3-phosphatase activity|inositol hexakisphosphate 2-phosphatase activity|	10	2.3	12.5	9	1.6	2.19	2.1	14	0.00258	0.8	3.4	0	0	0
ENSMUSG00000067148	POLR1C	polymerase (RNA) I polypeptide C, 30kDa	nucleoplasm|DNA-directed RNA polymerase III complex|DNA-directed RNA polymerase III complex|DNA-directed RNA polymerase I complex|cytosol|	transcription from RNA polymerase I promoter|transcription initiation from RNA polymerase I promoter|transcription elongation from RNA polymerase I promoter|termination of RNA polymerase I transcription|transcription from RNA polymerase III promoter|transcription elongation from RNA polymerase III promoter|termination of RNA polymerase III transcription|gene expression|positive regulation of type…	RNA polymerase I activity|RNA polymerase III activity|DNA binding|DNA-directed RNA polymerase activity|protein dimerization activity|	6	2.8	8.59	8	1.2	7.09	1.5	14	0.00258	0.8	3.7	0	0	0
ENSMUSG00000006289	OSGEP	O-sialoglycoprotein endopeptidase	nucleus|cytoplasm|	threonylcarbamoyladenosine biosynthetic process|	transferase activity, transferring acyl groups other than amino-acyl groups|metal ion binding|	6	1.6	7.06	7	2.3	8.05	2	14	0.00258	1	3.7	0	0	0
ENSMUSG00000057246	BC051142	cDNA sequence BC051142	cellular_component|	biological_process|	molecular_function|	8	-1.3	6.54	9	-1.7	8.11	-1.6	14	0.00258	-2.7	-0.7	0	0	0
ENSMUSG00000030223	PTPRO	protein tyrosine phosphatase, receptor type, O	plasma membrane|integral component of plasma membrane|integral component of membrane|apical plasma membrane|lateral plasma membrane|lamellipodium|axon|growth cone|neuron projection|dendritic spine|extracellular vesicular exosome|	cell morphogenesis|monocyte chemotaxis|regulation of glomerular filtration|negative regulation of glomerular filtration|protein dephosphorylation|protein dephosphorylation|axon guidance|negative regulation of cell-substrate adhesion|negative regulation of neuron projection development|lamellipodium assembly|glomerulus development|peptidyl-tyrosine dephosphorylation|slit diaphragm assembly|slit di…	protein tyrosine phosphatase activity|protein tyrosine phosphatase activity|protein tyrosine phosphatase activity|transmembrane receptor protein tyrosine phosphatase activity|protein binding|phosphatase activity|Wnt-protein binding|protein homodimerization activity|	9	-2.2	16.4	10	0.2	0.109	-2	14	0.00258	-3.6	-0.8	0	0	0
ENSMUSG00000029554	MAD1L1	MAD1 mitotic arrest deficient-like 1 (yeast)	kinetochore|kinetochore|condensed chromosome kinetochore|nucleus|nuclear pore|cytoplasm|centrosome|spindle|cytosol|actin cytoskeleton|mitotic spindle|	mitotic metaphase|mitotic anaphase|mitotic telophase|mitotic cell cycle|mitotic nuclear division|mitotic cell cycle checkpoint|mitotic spindle assembly checkpoint|regulation of metaphase plate congression|	protein binding|	6	2	7.82	6	1.8	6.59	2	13.9	0.00261	1.2	3.5	0	0	0
ENSMUSG00000019863	QRSL1	glutaminyl-tRNA synthase (glutamine-hydrolyzing)-like 1	mitochondrion|glutamyl-tRNA(Gln) amidotransferase complex|	mitochondrial translation|glutaminyl-tRNAGln biosynthesis via transamidation|	ATP binding|glutaminyl-tRNA synthase (glutamine-hydrolyzing) activity|	8	1.3	3.65	8	2.3	12.5	2.1	13.9	0.00261	1	3.8	0	0	0
ENSMUSG00000028798	EIF3I	eukaryotic translation initiation factor 3, subunit I	cytosol|eukaryotic translation initiation factor 3 complex|eukaryotic 43S preinitiation complex|eukaryotic 48S preinitiation complex|extracellular vesicular exosome|	formation of translation preinitiation complex|translation|translational initiation|translational initiation|translational initiation|regulation of translational initiation|gene expression|cellular protein metabolic process|	translation initiation factor activity|translation initiation factor activity|protein binding|	7	2.4	10	6	1.9	4.33	1.9	13.9	0.00261	1	3.8	0	0	0
ENSMUSG00000021635	RAD17	RAD17 homolog (S. pombe)	chromosome, telomeric region|nucleus|nucleoplasm|	DNA replication checkpoint|DNA damage checkpoint|DNA replication|DNA repair|cellular response to DNA damage stimulus|mitotic cell cycle checkpoint|negative regulation of DNA replication|regulation of phosphorylation|	protein binding|ATP binding|nucleoside-triphosphatase activity|	6	1.5	0.717	7	2.3	13.9	1.7	13.9	0.00261	0.9	3.9	0	0	0
ENSMUSG00000049988	LRRC25	leucine rich repeat containing 25	integral component of membrane|	None	None	10	-1.5	12.1	10	-1.1	2.42	-1.4	13.9	0.00261	-3.3	-0.6	0	0	0
ENSMUSG00000047810	CCDC88B	coiled-coil domain containing 88B	membrane|	None	None	7	2.5	3.12	7	1.8	11.6	1.8	13.8	0.00266	1	3.6	0	0	0
ENSMUSG00000098034	SERPINB10	serpin peptidase inhibitor, clade B (ovalbumin), member 10	extracellular space|nucleus|cytoplasm|	negative regulation of endopeptidase activity|regulation of proteolysis|	serine-type endopeptidase inhibitor activity|	7	2.3	6.36	9	2.3	7.79	2.3	13.8	0.00266	1	3.9	0	0	0
ENSMUSG00000024989	CEP55	centrosomal protein 55kDa	centrosome|centriole|membrane|midbody|cleavage furrow|intercellular bridge|	mitotic cytokinesis|mitotic nuclear division|establishment of protein localization|	protein binding|	9	3.3	13.5	9	0.9	1.85	2.2	13.8	0.00266	0.7	4.9	0	0	0
ENSMUSG00000049124	GM8186	small nuclear ribonucleoprotein polypeptide G pseudogene	None	None	None	6	1.4	6.6	3	2.4	9.3	2	13.8	0.00266	0.9	4	0	0	0
ENSMUSG00000029439	SFSWAP	splicing factor, suppressor of white-apricot family	nucleus|	transcription, DNA-templated|regulation of transcription, DNA-templated|mRNA splice site selection|mRNA processing|negative regulation of mRNA splicing, via spliceosome|	RNA binding|	9	2.3	8.42	9	1.4	6.8	1.9	13.8	0.00266	0.8	3.2	0	0	0
ENSMUSG00000040731	EIF4H	eukaryotic translation initiation factor 4H	cytosol|membrane|eukaryotic translation initiation factor 4F complex|perinuclear region of cytoplasm|	translation|translational initiation|regulation of translational initiation|gene expression|viral process|sexual reproduction|cellular protein metabolic process|developmental growth|	nucleotide binding|RNA binding|translation initiation factor activity|protein binding|translation factor activity, nucleic acid binding|poly(A) RNA binding|	9	2.3	11.8	10	1	4.82	1.9	13.8	0.00266	0.7	3.4	0	0	0
ENSMUSG00000031902	NFATC3	nuclear factor of activated T-cells, cytoplasmic, calcineurin-dependent 3	nucleus|nucleoplasm|nucleolus|cytoplasm|cytosol|	patterning of blood vessels|regulation of transcription from RNA polymerase II promoter|transcription from RNA polymerase II promoter|inflammatory response|heart development|Fc-epsilon receptor signaling pathway|innate immune response|cellular respiration|positive regulation of transcription from RNA polymerase II promoter|positive regulation of transcription from RNA polymerase II promoter|smoot…	RNA polymerase II core promoter proximal region sequence-specific DNA binding|RNA polymerase II core promoter proximal region sequence-specific DNA binding transcription factor activity involved in positive regulation of transcription|RNA polymerase II core promoter proximal region sequence-specific DNA binding transcription factor activity involved in positive regulation of transcription|chromat…	8	2.2	4.31	10	1.8	10	1.8	13.8	0.00266	0.9	3.2	0	0	0
ENSMUSG00000047632	FGFBP3	fibroblast growth factor binding protein 3	extracellular region|	positive regulation of vascular permeability|positive regulation of fibroblast growth factor receptor signaling pathway|	heparin binding|fibroblast growth factor binding|	10	1.4	5.71	9	1.5	8.39	1.4	13.7	0.0027	0.7	3.2	0	0	0
ENSMUSG00000022175	LRP10	low density lipoprotein receptor-related protein 10	coated pit|membrane|integral component of membrane|	endocytosis|	None	10	2.2	11.4	10	2	2.68	2.2	13.7	0.0027	0.8	3.5	0	0	0
ENSMUSG00000038311	2410017I17RIK	RIKEN cDNA 2410017I17 gene	cellular_component|	biological_process|	molecular_function|	10	1.7	9.64	10	1.7	4.45	1.7	13.7	0.0027	1	2.8	0	0	0
ENSMUSG00000041515	IRF8	interferon regulatory factor 8	nucleus|cytosol|	negative regulation of transcription from RNA polymerase II promoter|transcription from RNA polymerase II promoter|phagocytosis|immune response|cytokine-mediated signaling pathway|myeloid cell differentiation|positive regulation of interferon-gamma production|positive regulation of interleukin-12 production|defense response to bacterium|defense response to protozoan|negative regulation of growth …	regulatory region DNA binding|RNA polymerase II distal enhancer sequence-specific DNA binding transcription factor activity|protein binding|	9	1.6	8.45	7	1.1	6.78	1.2	13.7	0.0027	0.6	2.4	0	0	0
ENSMUSG00000027245	HYPK	huntingtin interacting protein K	nucleus|cytoplasm|	None	None	8	1.7	4.52	8	1.5	9.72	1.6	13.7	0.0027	0.7	2.8	0	0	0
ENSMUSG00000026753	PPP6C	protein phosphatase 6, catalytic subunit	cytosol|	G1/S transition of mitotic cell cycle|protein dephosphorylation|	protein serine/threonine phosphatase activity|protein binding|metal ion binding|	8	1.7	10.9	8	1.1	3.84	1.6	13.7	0.0027	0.8	2.6	0	0	0
ENSMUSG00000029102	HGFAC	HGF activator	extracellular region|extracellular space|rough endoplasmic reticulum|	proteolysis|	serine-type endopeptidase activity|serine-type peptidase activity|	10	1.7	4.39	8	1.6	9.69	1.6	13.7	0.0027	0.9	2.9	0	0	0
ENSMUSG00000030519	APBA2	amyloid beta (A4) precursor protein-binding, family A, member 2	plasma membrane|	in utero embryonic development|synaptic transmission|nervous system development|locomotory behavior|regulation of gene expression|protein transport|multicellular organism growth|	beta-amyloid binding|protein binding|	9	1.7	5.08	9	1.6	8.96	1.6	13.6	0.00275	0.8	2.7	0	0	0
ENSMUSG00000021265	SLC25A29	solute carrier family 25 (mitochondrial carnitine/acylcarnitine carrier), member 29	mitochondrial inner membrane|integral component of membrane|	acyl carnitine transmembrane transport|	acyl carnitine transmembrane transporter activity|	10	3.1	11	9	3	3.01	3	13.6	0.00275	1.6	5.4	0	0	0
ENSMUSG00000075134	OLFR1167	olfactory receptor 1167	plasma membrane|membrane|integral component of membrane|	signal transduction|G-protein coupled receptor signaling pathway|sensory perception of smell|response to stimulus|detection of chemical stimulus involved in sensory perception of smell|	signal transducer activity|G-protein coupled receptor activity|olfactory receptor activity|	10	-1.8	16.1	10	0.3	0.115	-1.5	13.6	0.00275	-3.1	-0.6	0	0	0
ENSMUSG00000029470	P2RX4	purinergic receptor P2X, ligand-gated ion channel, 4	integral component of nuclear inner membrane|lysosomal membrane|plasma membrane|integral component of plasma membrane|integral component of plasma membrane|membrane|cell junction|perinuclear region of cytoplasm|extracellular vesicular exosome|	tissue homeostasis|regulation of sodium ion transport|transport|cation transport|signal transduction|regulation of blood pressure|positive regulation of calcium ion transport into cytosol|positive regulation of calcium ion transport into cytosol|negative regulation of cardiac muscle hypertrophy|sensory perception of pain|positive regulation of prostaglandin secretion|response to ATP|ion transmemb…	purinergic nucleotide receptor activity|purinergic nucleotide receptor activity|extracellular ATP-gated cation channel activity|receptor binding|copper ion binding|ATP binding|zinc ion binding|protein homodimerization activity|cadherin binding|	9	1.4	5.03	8	2	9.63	1.7	13.6	0.00275	0.8	3.1	0	0	0
ENSMUSG00000033885	PXK	PX domain containing serine/threonine kinase	nucleus|cytoplasm|cytoplasm|microtubule organizing center|plasma membrane|plasma membrane|	inflammatory response|negative regulation of ATPase activity|negative regulation of ATPase activity|negative regulation of ion transport|negative regulation of ion transport|regulation of synaptic transmission|	actin binding|protein C-terminus binding|protein C-terminus binding|phosphatidylinositol binding|phosphatidylinositol binding|	10	3.3	12.7	9	1.9	2.06	2.6	13.6	0.00275	1.3	5.3	0	0	0
ENSMUSG00000094948	GM21286	N/A	None	None	None	6	1.8	8.86	6	2.2	5.34	2	13.6	0.00275	0.9	3.8	0	0	0
ENSMUSG00000040128	PNRC1	proline-rich nuclear receptor coactivator 1	nucleus|	transcription, DNA-templated|regulation of transcription, DNA-templated|	protein binding|	10	-1.9	3.03	10	-2.9	11.6	-2.4	13.6	0.00275	-5.3	-0.6	0	0	0
ENSMUSG00000034235	USP54	ubiquitin specific peptidase 54	None	ubiquitin-dependent protein catabolic process|	protein binding|ubiquitinyl hydrolase activity|	10	1.5	10.6	9	2	3.66	1.5	13.6	0.00275	0.9	2.9	0	0	0
ENSMUSG00000090539	GM9602	predicted gene 9602	cellular_component|	biological_process|	molecular_function|	6	1.6	2.67	7	2.8	12.5	2.5	13.5	0.0028	1.2	4.4	0	0	0
ENSMUSG00000095562	GM21887	N/A	None	None	None	6	1.4	9.46	6	1.5	4.42	1.4	13.5	0.0028	0.8	2.6	0	0	0
ENSMUSG00000067150	XPO5	exportin 5	nucleus|nucleoplasm|cytoplasm|cytosol|	protein export from nucleus|gene expression|gene silencing by RNA|	tRNA binding|RNA binding|protein binding|Ran GTPase binding|protein transporter activity|poly(A) RNA binding|	8	1.4	6.68	8	1.9	7.55	1.5	13.5	0.0028	0.7	2.7	0	0	0
ENSMUSG00000038357	CAMP	cathelicidin antimicrobial peptide	extracellular space|cell wall|cytosol|extracellular vesicular exosome|	innate immune response in mucosa|antibacterial humoral response|defense response to bacterium|negative regulation of growth of symbiont on or near host surface|defense response to Gram-positive bacterium|interaction with host|killing by host of symbiont cells|phagosome maturation|	protein binding|	10	2.7	7.29	10	2.3	6.62	2.3	13.5	0.0028	1.1	4.1	0	0	0
ENSMUSG00000020532	ACACA	acetyl-CoA carboxylase alpha	mitochondrion|cytosol|cytosol|extracellular vesicular exosome|	tissue homeostasis|acetyl-CoA metabolic process|energy reserve metabolic process|fatty acid biosynthetic process|vitamin metabolic process|water-soluble vitamin metabolic process|biotin metabolic process|carnitine shuttle|triglyceride biosynthetic process|positive regulation of cellular metabolic process|long-chain fatty-acyl-CoA biosynthetic process|cellular lipid metabolic process|multicellular…	acetyl-CoA carboxylase activity|acetyl-CoA carboxylase activity|biotin carboxylase activity|protein binding|ATP binding|metal ion binding|	7	3.7	12.5	8	2.1	2.74	2.8	13.5	0.0028	1.3	5.9	0	0	0
ENSMUSG00000038838	VARS2	valyl-tRNA synthetase 2, mitochondrial	mitochondrion|	tRNA aminoacylation for protein translation|valyl-tRNA aminoacylation|regulation of translational fidelity|gene expression|	aminoacyl-tRNA editing activity|valine-tRNA ligase activity|ATP binding|	7	-0.3	0.259	8	2.4	15.9	2.4	13.5	0.0028	1.1	4.7	0	0	0
ENSMUSG00000022312	EIF3H	eukaryotic translation initiation factor 3, subunit H	cytosol|eukaryotic translation initiation factor 3 complex|membrane|eukaryotic 43S preinitiation complex|eukaryotic 48S preinitiation complex|extracellular vesicular exosome|	formation of translation preinitiation complex|translation|translational initiation|translational initiation|translational initiation|regulation of translational initiation|gene expression|cellular protein metabolic process|	translation initiation factor activity|translation initiation factor activity|protein binding|poly(A) RNA binding|	8	2	0.969	10	2.1	12.7	2.1	13.4	0.00285	1.1	3.8	0	0	0
ENSMUSG00000038664	HERC1	HECT and RLD domain containing E3 ubiquitin protein ligase family member 1	cytoplasm|Golgi apparatus|cytosol|membrane|	transport|negative regulation of autophagy|protein ubiquitination|cerebellar Purkinje cell differentiation|neuron projection development|positive regulation of GTPase activity|positive regulation of GTPase activity|neuromuscular process controlling balance|	ubiquitin-protein transferase activity|ARF guanyl-nucleotide exchange factor activity|ligase activity|	8	2.3	10	9	1.6	4.59	2	13.4	0.00285	1	3.5	0	0	0
ENSMUSG00000034177	RNF43	ring finger protein 43	nuclear envelope|endoplasmic reticulum membrane|integral component of plasma membrane|	Wnt signaling pathway|protein ubiquitination|negative regulation of Wnt signaling pathway|Wnt receptor catabolic process|protein ubiquitination involved in ubiquitin-dependent protein catabolic process|stem cell proliferation|	ubiquitin-protein transferase activity|frizzled binding|protein binding|zinc ion binding|ligase activity|	10	2	14.2	10	-0.3	0.238	1.6	13.4	0.00285	0.9	3.3	0	0	0
ENSMUSG00000094692	OLFR738	olfactory receptor 738	plasma membrane|membrane|integral component of membrane|	signal transduction|G-protein coupled receptor signaling pathway|sensory perception of smell|response to stimulus|detection of chemical stimulus involved in sensory perception of smell|	signal transducer activity|G-protein coupled receptor activity|olfactory receptor activity|	10	1.3	0.685	10	2.6	14.7	2.5	13.4	0.00285	1.1	4.5	0	0	0
ENSMUSG00000030079	RUVBL1	RuvB-like AAA ATPase 1	Swr1 complex|nucleus|nucleoplasm|cytoplasm|Golgi apparatus|microtubule organizing center|membrane|nuclear matrix|Ino80 complex|NuA4 histone acetyltransferase complex|intracellular membrane-bounded organelle|extracellular vesicular exosome|MLL1 complex|	DNA repair|DNA recombination|chromatin organization|nucleosome assembly|transcription, DNA-templated|regulation of transcription from RNA polymerase II promoter|mitotic nuclear division|spermatogenesis|DNA duplex unwinding|DNA duplex unwinding|centromere-specific nucleosome assembly|regulation of growth|histone H4 acetylation|histone H2A acetylation|	DNA helicase activity|protein binding|ATP binding|	3	2.4	3.37	5	2	10.5	2.3	13.4	0.00285	1.2	4.4	0	0	0
ENSMUSG00000028381	UGCG	UDP-glucose ceramide glucosyltransferase	Golgi membrane|membrane|integral component of membrane|	sphingolipid metabolic process|glucosylceramide biosynthetic process|glycosphingolipid metabolic process|glycosphingolipid biosynthetic process|epidermis development|small molecule metabolic process|	ceramide glucosyltransferase activity|	10	2.8	2.31	10	2.6	11.5	2.7	13.4	0.00285	1.5	4.7	0	0	0
ENSMUSG00000006288	TTC5	tetratricopeptide repeat domain 5	nucleus|cytoplasm|	DNA repair|positive regulation of transcription from RNA polymerase II promoter|	DNA binding|chromatin binding|	9	1.8	5.82	10	1.7	8.01	1.7	13.4	0.00285	1	2.9	0	0	0
ENSMUSG00000031948	KARS	lysyl-tRNA synthetase	extracellular region|nucleus|cytoplasm|mitochondrion|mitochondrial matrix|cytosol|plasma membrane|microtubule cytoskeleton|aminoacyl-tRNA synthetase multienzyme complex|	tRNA aminoacylation for protein translation|lysyl-tRNA aminoacylation|tRNA processing|cell death|gene expression|diadenosine tetraphosphate biosynthetic process|viral process|	tRNA binding|lysine-tRNA ligase activity|lysine-tRNA ligase activity|protein binding|ATP binding|amino acid binding|metal ion binding|	7	2.1	0.661	7	1.5	13.3	1.7	13.3	0.00291	0.9	3.2	0	0	0
ENSMUSG00000073028	IGKV4-71	immunoglobulin kappa chain variable 4-71	cellular_component|	biological_process|	molecular_function|	10	1.4	9.18	9	1.2	4.61	1.4	13.3	0.00291	0.8	3.1	0	0	0
ENSMUSG00000062619	2310039H08RIK	RIKEN cDNA 2310039H08 gene	cellular_component|	biological_process|	molecular_function|	10	2.1	15.8	10	-0.5	0.475	2	13.3	0.00291	0.9	3.6	0	0	0
ENSMUSG00000018604	TBX3	T-box 3	nucleus|	negative regulation of transcription from RNA polymerase II promoter|skeletal system development|blood vessel development|in utero embryonic development|heart looping|outflow tract morphogenesis|atrioventricular bundle cell differentiation|transcription, DNA-templated|regulation of transcription from RNA polymerase II promoter|cell aging|positive regulation of cell proliferation|anterior/posterio…	RNA polymerase II transcription factor binding|RNA polymerase II activating transcription factor binding|sequence-specific DNA binding transcription factor activity|protein binding|sequence-specific DNA binding|	9	2.1	1.72	9	1.6	12	2.1	13.3	0.00291	0.9	3.6	0	0	0
ENSMUSG00000047824	PYGO2	pygopus family PHD finger 2	nucleus|	in utero embryonic development|kidney development|lens development in camera-type eye|brain development|post-embryonic development|mammary gland development|regulation of mammary gland epithelial cell proliferation|developmental growth|regulation of histone H3-K4 methylation|palate development|canonical Wnt signaling pathway|	protein binding|zinc ion binding|histone binding|	9	3.9	15.7	10	0.7	1.55	3.8	13.3	0.00291	1	6.6	0	0	0
ENSMUSG00000034621	GPATCH8	G patch domain containing 8	cellular_component|	biological_process|	protein binding|poly(A) RNA binding|metal ion binding|	10	1.5	12.3	10	0.9	1.97	1.5	13.3	0.00291	0.7	2.9	0	0	0
ENSMUSG00000078923	UBE2V1	ubiquitin-conjugating enzyme E2 variant 1	ubiquitin ligase complex|nucleus|cytoplasm|cytosol|ubiquitin conjugating enzyme complex|UBC13-UEV1A complex|protein complex|extracellular vesicular exosome|	protein polyubiquitination|toll-like receptor signaling pathway|MyD88-dependent toll-like receptor signaling pathway|regulation of DNA repair|regulation of transcription, DNA-templated|cell differentiation|toll-like receptor 2 signaling pathway|toll-like receptor 4 signaling pathway|toll-like receptor 5 signaling pathway|toll-like receptor 9 signaling pathway|toll-like receptor 10 signaling pathw…	protein binding|acid-amino acid ligase activity|	7	2.8	9.74	9	1.8	5.25	2.6	13.3	0.00291	1.4	4.6	0	0	0
ENSMUSG00000029505	EP400	E1A binding protein p400	Swr1 complex|nucleoplasm|nuclear speck|NuA4 histone acetyltransferase complex|	chromatin organization|histone H4 acetylation|histone H2A acetylation|	DNA binding|chromatin binding|helicase activity|ATP binding|	10	2.4	10.3	9	1.2	5.69	1.7	13.3	0.00291	0.7	3.2	0	0	0
ENSMUSG00000042046	DSTYK	dual serine/threonine and tyrosine protein kinase	cytoplasm|	peptidyl-tyrosine phosphorylation|	protein serine/threonine kinase activity|protein serine/threonine/tyrosine kinase activity|protein tyrosine kinase activity|ATP binding|	10	-1.8	13.7	10	-0.8	2.09	-1.5	13.3	0.00291	-2.8	-0.5	0	0	0
ENSMUSG00000031479	VPS36	vacuolar protein sorting 36 homolog (S. cerevisiae)	nucleus|lysosome|endosome|late endosome|cytosol|membrane|extracellular vesicular exosome|	transcription, DNA-templated|regulation of transcription, DNA-templated|protein transport|endosomal transport|membrane organization|	protein binding|phosphatidylinositol-3-phosphate binding|ubiquitin binding|	6	1.3	8.98	6	2.3	6.18	1.5	13.3	0.00291	0.8	3.6	0	0	0
ENSMUSG00000038208	PGAP3	post-GPI attachment to proteins 3	Golgi membrane|integral component of membrane|intrinsic component of endoplasmic reticulum membrane|	GPI anchor metabolic process|GPI anchor biosynthetic process|	hydrolase activity, acting on ester bonds|	10	1.4	0.616	10	1.6	12.9	1.5	13.2	0.00298	0.8	2.8	0	0	0
ENSMUSG00000056666	RETSAT	retinol saturase (all-trans-retinol 13,14-reductase)	nuclear outer membrane|endoplasmic reticulum membrane|endoplasmic reticulum membrane|membrane|nuclear membrane|	retinol metabolic process|retinol metabolic process|oxidation-reduction process|	oxidoreductase activity|all-trans-retinol 13,14-reductase activity|all-trans-retinol 13,14-reductase activity|	10	3.5	11.9	10	2.1	3.69	2.8	13.2	0.00298	1.2	5.7	0	0	0
ENSMUSG00000063849	PPCDC	phosphopantothenoylcysteine decarboxylase	cytosol|	vitamin metabolic process|water-soluble vitamin metabolic process|coenzyme biosynthetic process|coenzyme A biosynthetic process|coenzyme A biosynthetic process|pantothenate metabolic process|small molecule metabolic process|	phosphopantothenoylcysteine decarboxylase activity|phosphopantothenoylcysteine decarboxylase activity|	6	2.1	10.9	6	1.1	3.71	1.9	13.2	0.00298	0.9	3.5	0	0	0
ENSMUSG00000063273	NAA15	N(alpha)-acetyltransferase 15, NatA auxiliary subunit	nucleus|transcription factor complex|cytoplasm|membrane|NatA complex|	angiogenesis|transcription, DNA-templated|N-terminal protein amino acid acetylation|cell differentiation|negative regulation of apoptotic process|positive regulation of transcription, DNA-templated|protein stabilization|	protein binding|N-acetyltransferase activity|acetyltransferase activity|ribosome binding|ribosome binding|poly(A) RNA binding|	9	1.9	11.4	7	1.2	2.66	1.8	13.2	0.00298	0.7	3.2	0	0	0
ENSMUSG00000052429	PRMT1	protein arginine methyltransferase 1	nucleus|nucleoplasm|cytoplasm|cytosol|	regulation of transcription, DNA-templated|protein methylation|cell surface receptor signaling pathway|histone methylation|peptidyl-arginine methylation|peptidyl-arginine methylation, to asymmetrical-dimethyl arginine|neuron projection development|histone H4-R3 methylation|negative regulation of megakaryocyte differentiation|	protein binding|methyltransferase activity|N-methyltransferase activity|N-methyltransferase activity|protein-arginine omega-N asymmetric methyltransferase activity|histone methyltransferase activity|identical protein binding|histone methyltransferase activity (H4-R3 specific)|poly(A) RNA binding|	9	1.9	9.5	7	1.8	4.07	1.8	13.2	0.00298	1	3.7	0	0	0
ENSMUSG00000033294	NOC4L	nucleolar complex associated 4 homolog (S. cerevisiae)	nucleus|nucleolus|nucleolus|integral component of membrane|nuclear membrane|	rRNA processing|	protein binding|poly(A) RNA binding|	9	1.2	2.83	10	1.5	11	1.4	13.2	0.00298	0.7	2.5	0	0	0
ENSMUSG00000004100	PPAN	peter pan homolog (Drosophila)	nucleus|nucleolus|	RNA splicing|	poly(A) RNA binding|	7	1.7	5.35	8	2.7	9.47	2	13.2	0.00298	1.2	4.4	0	0	0
ENSMUSG00000021266	WARS	tryptophanyl-tRNA synthetase	nucleus|cytoplasm|cytoplasm|cytosol|extracellular vesicular exosome|	angiogenesis|translation|tRNA aminoacylation for protein translation|tryptophanyl-tRNA aminoacylation|negative regulation of cell proliferation|gene expression|regulation of angiogenesis|	tryptophan-tRNA ligase activity|tryptophan-tRNA ligase activity|protein binding|ATP binding|	10	1.9	8.84	6	2	4.84	1.9	13.2	0.00298	1.1	3.3	0	0	0
ENSMUSG00000092167	GM3696	predicted gene 3696	cellular_component|	biological_process|	molecular_function|	8	1.4	11.2	7	0.9	3.27	1.2	13.2	0.00298	0.6	2.6	0	0	0
ENSMUSG00000030244	GYS2	glycogen synthase 2 (liver)	cytoplasm|cytosol|cytosol|cytoskeleton|cell cortex|cortical actin cytoskeleton|ectoplasm|	carbohydrate metabolic process|glycogen biosynthetic process|glycogen biosynthetic process|glycogen biosynthetic process|glycogen biosynthetic process|glucose metabolic process|generation of precursor metabolites and energy|response to glucose|small molecule metabolic process|	glycogen (starch) synthase activity|glycogen (starch) synthase activity|glycogen (starch) synthase activity|protein homodimerization activity|glycogen synthase activity, transferring glucose-1-phosphate|	10	1.7	9.72	10	-1.9	6.45	1.6	13.1	0.00304	0.7	2.7	0	0	0
ENSMUSG00000074576	MOCS3	molybdenum cofactor synthesis 3	cytosol|cytosol|	tRNA wobble uridine modification|tRNA wobble position uridine thiolation|vitamin metabolic process|water-soluble vitamin metabolic process|Mo-molybdopterin cofactor biosynthetic process|protein adenylylation|enzyme active site formation via L-cysteine persulfide|molybdopterin cofactor biosynthetic process|protein urmylation|tRNA thio-modification|small molecule metabolic process|	thiosulfate sulfurtransferase activity|protein binding|ATP binding|nucleotidyltransferase activity|sulfurtransferase activity|sulfurtransferase activity|URM1 activating enzyme activity|metal ion binding|molybdopterin-synthase sulfurtransferase activity|molybdopterin-synthase adenylyltransferase activity|protein adenylyltransferase activity|	10	3	13.2	9	1.7	1.58	2.5	13.1	0.00304	1.3	4.7	0	0	0
ENSMUSG00000044147	ARF6	ADP-ribosylation factor 6	ruffle|endosome|endosome|early endosome|Golgi apparatus|plasma membrane|cell cortex|membrane|endocytic vesicle|midbody|filopodium membrane|cleavage furrow|recycling endosome membrane|extracellular vesicular exosome|	liver development|GTP catabolic process|cellular component movement|cell cycle|cell adhesion|small GTPase mediated signal transduction|protein transport|vesicle-mediated transport|positive regulation of actin filament polymerization|cortical actin cytoskeleton organization|ruffle organization|myeloid cell apoptotic process|protein localization to cell surface|regulation of Rac protein signal tran…	GTPase activity|protein binding|GTP binding|thioesterase binding|	10	1	2.55	9	2.1	12.6	1.9	13.1	0.00304	0.8	3.4	0	0	0
ENSMUSG00000022360	ATAD2	ATPase family, AAA domain containing 2	nucleus|extracellular vesicular exosome|	ATP catabolic process|transcription, DNA-templated|positive regulation of transcription, DNA-templated|	ATP binding|ATPase activity|	7	1.8	2.06	8	2.3	11.5	1.9	13.1	0.00304	0.9	3.7	0	0	0
ENSMUSG00000041237	PKLR	pyruvate kinase, liver and RBC	cytosol|extracellular vesicular exosome|	response to hypoxia|carbohydrate metabolic process|glucose metabolic process|glycolytic process|glycolytic process|energy reserve metabolic process|ATP biosynthetic process|response to nutrient|response to heat|response to glucose|response to lithium ion|phosphorylation|endocrine pancreas development|positive regulation of cellular metabolic process|cellular response to insulin stimulus|response …	magnesium ion binding|pyruvate kinase activity|ATP binding|potassium ion binding|	9	1.4	8.48	10	1.5	4.99	1.5	13	0.0031	0.7	2.6	0	0	0
ENSMUSG00000031217	EFNB1	ephrin-B1	nucleus|cytoplasm|plasma membrane|integral component of plasma membrane|membrane raft|synapse|extracellular vesicular exosome|	neural crest cell migration|cell adhesion|cell-cell signaling|axon guidance|embryonic pattern specification|positive regulation of T cell proliferation|ephrin receptor signaling pathway|	protein binding|ephrin receptor binding|	9	-1.1	5.77	9	1.4	10.5	1.8	13	0.0031	0.7	4.3	0	0	0
ENSMUSG00000042349	IKBKE	inhibitor of kappa light polypeptide gene enhancer in B-cells, kinase epsilon	nucleus|cytoplasm|cytosol|endosome membrane|PML body|	toll-like receptor signaling pathway|MyD88-independent toll-like receptor signaling pathway|protein phosphorylation|immune response|I-kappaB phosphorylation|intrinsic apoptotic signaling pathway in response to DNA damage|negative regulation of type I interferon production|toll-like receptor 3 signaling pathway|toll-like receptor 4 signaling pathway|TRIF-dependent toll-like receptor signaling path…	NF-kappaB-inducing kinase activity|protein binding|ATP binding|IkappaB kinase activity|	10	3.3	9.11	9	1.2	5.06	1.5	13	0.0031	0.6	4	0	0	0
ENSMUSG00000021109	HIF1A	hypoxia inducible factor 1, alpha subunit (basic helix-loop-helix transcription factor)	nucleus|nucleoplasm|transcription factor complex|nucleolus|cytoplasm|cytosol|cytosol|motile cilium|	angiogenesis|response to hypoxia|response to hypoxia|neural crest cell migration|epithelial to mesenchymal transition|embryonic placenta development|B-1 B cell homeostasis|positive regulation of endothelial cell proliferation|heart looping|positive regulation of neuroblast proliferation|connective tissue replacement involved in inflammatory response wound healing|outflow tract morphogenesis|cardi…	transcription factor binding transcription factor activity|RNA polymerase II transcription factor binding transcription factor activity|RNA polymerase II core promoter proximal region sequence-specific DNA binding transcription factor activity involved in positive regulation of transcription|sequence-specific DNA binding transcription factor activity|sequence-specific DNA binding transcription fa…	10	1.9	4.87	10	1.4	8.83	1.9	13	0.0031	0.8	3.3	0	0	0
ENSMUSG00000002416	NDUFB2	NADH dehydrogenase (ubiquinone) 1 beta subcomplex, 2, 8kDa	mitochondrial inner membrane|mitochondrial respiratory chain complex I|mitochondrial respiratory chain complex I|	mitochondrial electron transport, NADH to ubiquinone|respiratory electron transport chain|cellular metabolic process|small molecule metabolic process|	NADH dehydrogenase (ubiquinone) activity|	10	1.9	11.7	10	1.2	2.6	1.8	13	0.0031	1	3.5	0	0	0
ENSMUSG00000056201	CFL1	cofilin 1 (non-muscle)	extracellular space|nucleus|cytoplasm|membrane|nuclear matrix|cortical actin cytoskeleton|lamellipodium membrane|ruffle membrane|extracellular vesicular exosome|	neural crest cell migration|neural fold formation|platelet degranulation|protein phosphorylation|protein import into nucleus|cytoskeleton organization|Rho protein signal transduction|axon guidance|blood coagulation|response to virus|regulation of cell morphogenesis|establishment of cell polarity|actin cytoskeleton organization|actin filament depolymerization|platelet activation|positive regulatio…	actin binding|protein binding|	5	2.7	10.5	5	1.5	4.26	2	13	0.0031	1	4.6	0	0	0
ENSMUSG00000003848	NOB1	NIN1/RPN12 binding protein 1 homolog (S. cerevisiae)	nucleus|	visual perception|	metal ion binding|	6	1.5	6.76	5	1.8	6.76	1.6	13	0.0031	0.9	3.2	0	0	0
ENSMUSG00000041264	USPL1	ubiquitin specific peptidase like 1	extracellular space|Cajal body|	proteolysis|cell proliferation|protein desumoylation|Cajal body organization|	protein binding|SUMO binding|SUMO-specific isopeptidase activity|	9	1.2	6.47	7	2.6	7.69	1.3	12.9	0.00319	0.6	3.4	0	0	0
ENSMUSG00000026229	PSMD1	proteasome (prosome, macropain) 26S subunit, non-ATPase, 1	proteasome complex|nucleoplasm|cytosol|proteasome regulatory particle|membrane|proteasome accessory complex|extracellular vesicular exosome|	G1/S transition of mitotic cell cycle|protein polyubiquitination|mitotic cell cycle|antigen processing and presentation of peptide antigen via MHC class I|antigen processing and presentation of exogenous peptide antigen via MHC class I, TAP-dependent|regulation of cellular amino acid metabolic process|apoptotic process|DNA damage response, signal transduction by p53 class mediator resulting in ce…	enzyme regulator activity|	8	1.2	2.14	7	3.9	13.6	1.7	12.9	0.00319	0.8	6	0	0	0
ENSMUSG00000020087	TYSND1	trypsin domain containing 1	peroxisome|membrane|	proteolysis|protein processing|regulation of fatty acid beta-oxidation|protein homooligomerization|	protease binding|serine-type endopeptidase activity|identical protein binding|	8	1.8	4.91	8	2.2	8.61	1.9	12.9	0.00319	0.8	3.5	0	0	0
ENSMUSG00000025188	HPS1	Hermansky-Pudlak syndrome 1	cytoplasm|lysosome|integral component of plasma membrane|cytoplasmic membrane-bounded vesicle|BLOC-3 complex|	lysosome organization|blood coagulation|visual perception|melanocyte differentiation|positive regulation of natural killer cell activation|secretion of lysosomal enzymes|eye pigmentation|retina development in camera-type eye|	protein binding|protein dimerization activity|	9	1.6	6.79	8	2.5	7.19	1.7	12.9	0.00319	0.8	3.7	0	0	0
ENSMUSG00000090035	GALNT4	polypeptide N-acetylgalactosaminyltransferase 4	Golgi membrane|Golgi apparatus|integral component of membrane|perinuclear region of cytoplasm|extracellular vesicular exosome|	carbohydrate metabolic process|O-glycan processing|post-translational protein modification|cellular protein metabolic process|	polypeptide N-acetylgalactosaminyltransferase activity|metal ion binding|	8	1.3	1.84	8	2.2	12.6	2	12.9	0.00319	0.9	3.8	0	0	0
ENSMUSG00000041781	CPSF2	cleavage and polyadenylation specific factor 2, 100kDa	nucleoplasm|mRNA cleavage and polyadenylation specificity factor complex|membrane|	mRNA splicing, via spliceosome|transcription from RNA polymerase II promoter|termination of RNA polymerase II transcription|mRNA polyadenylation|mRNA cleavage|histone mRNA 3'-end processing|mRNA export from nucleus|RNA splicing|gene expression|mRNA 3'-end processing|	RNA binding|protein binding|hydrolase activity|	6	-0.1	0.0153	6	2.5	14.1	2.4	12.9	0.00319	1.4	4.6	0	0	0
ENSMUSG00000032648	PYGM	phosphorylase, glycogen, muscle	cytosol|	carbohydrate metabolic process|glycogen metabolic process|glycogen catabolic process|glucose metabolic process|small molecule metabolic process|	nucleotide binding|glycogen phosphorylase activity|pyridoxal phosphate binding|	9	1.9	11.1	10	1.2	2.87	1.8	12.9	0.00319	0.8	3.1	0	0	0
ENSMUSG00000020184	MDM2	MDM2 proto-oncogene, E3 ubiquitin protein ligase	nucleus|nucleus|nucleoplasm|nucleoplasm|nucleolus|cytoplasm|cytosol|plasma membrane|nuclear body|endocytic vesicle membrane|protein complex|synapse|	negative regulation of transcription from RNA polymerase II promoter|protein complex assembly|DNA damage response, signal transduction by p53 class mediator resulting in cell cycle arrest|DNA damage response, signal transduction by p53 class mediator resulting in cell cycle arrest|traversing start control point of mitotic cell cycle|epidermal growth factor receptor signaling pathway|synaptic tran…	p53 binding|ubiquitin-protein transferase activity|ubiquitin-protein transferase activity|protein binding|zinc ion binding|ligase activity|enzyme binding|ubiquitin protein ligase binding|identical protein binding|peroxisome proliferator activated receptor binding|scaffold protein binding|	6	1.1	0.283	9	1.9	13.5	1.8	12.9	0.00319	0.9	3.5	0	0	0
ENSMUSG00000020098	PCBD1	pterin-4 alpha-carbinolamine dehydratase/dimerization cofactor of hepatocyte nuclear factor 1 alpha	nucleus|cytoplasm|cytosol|extracellular vesicular exosome|	transcription, DNA-templated|L-phenylalanine catabolic process|tetrahydrobiopterin biosynthetic process|cellular nitrogen compound metabolic process|regulation of protein homodimerization activity|small molecule metabolic process|positive regulation of transcription, DNA-templated|protein homotetramerization|protein heterooligomerization|oxidation-reduction process|	transcription coactivator activity|phenylalanine 4-monooxygenase activity|protein binding|4-alpha-hydroxytetrahydrobiopterin dehydratase activity|identical protein binding|	10	1.8	10.7	10	1.6	2.44	1.7	12.8	0.00328	0.9	3.4	0	0	0
ENSMUSG00000047638	NR1H4	nuclear receptor subfamily 1, group H, member 4	nucleoplasm|nuclear euchromatin|	negative regulation of transcription from RNA polymerase II promoter|nitrogen catabolite activation of transcription from RNA polymerase II promoter|regulation of carbohydrate metabolic process|transcription initiation from RNA polymerase II promoter|signal transduction|bile acid metabolic process|response to glucose|gene expression|intracellular receptor signaling pathway|response to lipopolysac…	RNA polymerase II distal enhancer sequence-specific DNA binding|RNA polymerase II transcription factor binding transcription factor activity involved in positive regulation of transcription|sequence-specific DNA binding transcription factor activity|RNA polymerase II distal enhancer sequence-specific DNA binding transcription factor activity|steroid hormone receptor activity|transcription coactiv…	9	0.8	2.28	9	1.9	13.3	1.7	12.8	0.00328	0.7	3.2	0	0	0
ENSMUSG00000020897	AURKB	aurora kinase B	condensed chromosome, centromeric region|condensed nuclear chromosome, centromeric region|nucleus|spindle|cytosol|chromocenter|midbody|midbody|chromosome passenger complex|chromosome passenger complex|intercellular bridge|	negative regulation of transcription from RNA polymerase II promoter|mitotic cell cycle|negative regulation of B cell apoptotic process|protein phosphorylation|aging|cell proliferation|attachment of spindle microtubules to kinetochore|abscission|histone modification|anaphase-promoting complex-dependent proteasomal ubiquitin-dependent protein catabolic process|cytokinesis checkpoint|spindle checkp…	protein serine/threonine kinase activity|protein serine/threonine/tyrosine kinase activity|protein binding|ATP binding|histone serine kinase activity|metal ion binding|	6	0.9	3.81	8	1.6	9.55	1.5	12.8	0.00328	0.8	2.6	0	0	0
ENSMUSG00000015401	TMEM27	transmembrane protein 27	cytoplasm|integral component of membrane|extracellular vesicular exosome|	proteolysis|positive regulation of SNARE complex assembly|positive regulation of insulin secretion involved in cellular response to glucose stimulus|positive regulation of calcium ion-dependent exocytosis|	protein binding|metallopeptidase activity|peptidyl-dipeptidase activity|	10	2	11.5	7	1.4	2.39	1.9	12.8	0.00328	1	3.3	0	0	0
ENSMUSG00000034152	EXOC3	exocyst complex component 3	exocyst|secretory granule membrane|	exocytosis|protein transport|cellular protein metabolic process|membrane organization|	protein binding|	6	2.6	6.41	8	1.2	7.58	1.3	12.8	0.00328	0.6	3.2	0	0	0
ENSMUSG00000020525	PPM1D	protein phosphatase, Mg2+/Mn2+ dependent, 1D	nucleus|	G2/M transition of mitotic cell cycle|protein dephosphorylation|negative regulation of cell proliferation|response to radiation|response to bacterium|peptidyl-threonine dephosphorylation|	protein serine/threonine phosphatase activity|protein binding|metal ion binding|	7	1.5	4.73	10	1.6	8.46	1.5	12.8	0.00328	0.7	3.4	0	0	0
ENSMUSG00000021756	IL6ST	interleukin 6 signal transducer	extracellular region|extracellular space|plasma membrane|interleukin-6 receptor complex|oncostatin-M receptor complex|external side of plasma membrane|membrane|dendrite|neuronal cell body|extracellular vesicular exosome|ciliary neurotrophic factor receptor complex|	positive regulation of acute inflammatory response|positive regulation of adaptive immune response|glycogen metabolic process|positive regulation of cell proliferation|positive regulation of cell proliferation|regulation of Notch signaling pathway|positive regulation vascular endothelial growth factor production|positive regulation of cardiac muscle hypertrophy|viral process|cytokine-mediated sig…	ciliary neurotrophic factor receptor activity|interleukin-6 receptor activity|interleukin-6 receptor activity|interleukin-11 receptor activity|leukemia inhibitory factor receptor activity|oncostatin-M receptor activity|ciliary neurotrophic factor receptor binding|interleukin-6 receptor binding|protein binding|growth factor binding|growth factor binding|interleukin-11 binding|interleukin-6 binding…	10	-1	1.55	9	4.3	13.4	3.9	12.8	0.00328	1	7.4	0	0	0
ENSMUSG00000008435	RDH13	retinol dehydrogenase 13 (all-trans/9-cis)	mitochondrion|	oxidation-reduction process|	oxidoreductase activity|	10	2.7	13.2	10	1.4	0.947	2.3	12.8	0.00328	0.9	4.2	0	0	0
ENSMUSG00000031935	MED17	mediator complex subunit 17	nucleus|nucleoplasm|transcription factor complex|membrane|mediator complex|	regulation of transcription from RNA polymerase II promoter|transcription initiation from RNA polymerase II promoter|transcription initiation from RNA polymerase II promoter|gene expression|stem cell maintenance|intracellular steroid hormone receptor signaling pathway|androgen receptor signaling pathway|positive regulation of transcription, DNA-templated|positive regulation of transcription from …	RNA polymerase II transcription cofactor activity|transcription cofactor activity|transcription coactivator activity|receptor activity|ligand-dependent nuclear receptor transcription coactivator activity|vitamin D receptor binding|thyroid hormone receptor binding|	8	1.2	3.54	9	1.4	9.78	1.3	12.8	0.00328	0.6	2.5	0	0	0
ENSMUSG00000063254	B230325K18RIK	RIKEN cDNA B230325K18 gene	cellular_component|	biological_process|	molecular_function|	9	1.1	3.91	8	1.3	9.36	1.3	12.8	0.00328	0.6	2.8	0	0	0
ENSMUSG00000039382	WDR45	WD repeat domain 45	None	autophagy|cell death|	None	10	2.4	8.28	10	1.2	6.72	1.4	12.7	0.00336	0.7	3.1	0	0	0
ENSMUSG00000029578	WIPI2	WD repeat domain, phosphoinositide interacting 2	nucleus|cytoplasm|autophagic vacuole|cytosol|pre-autophagosomal structure membrane|protein complex|	autophagic vacuole assembly|	protein binding|phosphatidylinositol-3-phosphate binding|phosphatidylinositol-3,5-bisphosphate binding|	8	1.6	8.99	7	1.7	4.08	1.7	12.7	0.00336	0.9	3	0	0	0
ENSMUSG00000030002	DUSP11	dual specificity phosphatase 11 (RNA/RNP complex 1-interacting)	nucleus|nuclear speck|	RNA processing|RNA metabolic process|peptidyl-tyrosine dephosphorylation|peptidyl-tyrosine dephosphorylation|polynucleotide 5' dephosphorylation|	RNA binding|polynucleotide 5'-phosphatase activity|protein tyrosine phosphatase activity|protein tyrosine/serine/threonine phosphatase activity|phosphatase activity|poly(A) RNA binding|nucleotide phosphatase activity, acting on free nucleotides|	10	1.9	8.97	9	1	5.79	1.8	12.7	0.00336	0.7	2.9	0	0	0
ENSMUSG00000029245	EPHA5	EPH receptor A5	rough endoplasmic reticulum|plasma membrane|integral component of plasma membrane|external side of plasma membrane|axon|dendrite|neuronal cell body|perinuclear region of cytoplasm|	axon guidance|peptidyl-tyrosine phosphorylation|cAMP-mediated signaling|hippocampus development|regulation of Rac GTPase activity|positive regulation of CREB transcription factor activity|regulation of actin cytoskeleton organization|ephrin receptor signaling pathway|neuron development|negative regulation of synapse assembly|regulation of insulin secretion involved in cellular response to glucose…	ephrin receptor activity|GPI-linked ephrin receptor activity|transmembrane-ephrin receptor activity|ATP binding|	8	2.9	9.67	9	1.6	4.63	2.1	12.7	0.00336	1	4.2	0	0	0
ENSMUSG00000097845	A230020J21RIK	RIKEN cDNA A230020J21 gene	None	None	None	6	1.6	5.97	5	1.8	7.12	1.7	12.6	0.00344	0.9	3.3	0	0	0
ENSMUSG00000037649	H2-DMA	histocompatibility 2, class II, locus DMa	intracellular|lysosome|lysosomal membrane|endosome|late endosome|multivesicular body|cell surface|endosome membrane|membrane|membrane|integral component of membrane|MHC class II protein complex|extracellular vesicular exosome|	immune system process|peptide antigen assembly with MHC class II protein complex|antigen processing and presentation of peptide or polysaccharide antigen via MHC class II|positive regulation of germinal center formation|positive regulation of humoral immune response|protein complex assembly|immune response|protein transport|immunoglobulin mediated immune response|antigen processing and presentati…	protein binding|MHC class II protein complex binding|	10	1.5	6.61	9	1.3	6.53	1.4	12.6	0.00344	0.7	2.4	0	0	0
ENSMUSG00000034255	ARHGAP27	Rho GTPase activating protein 27	intracellular|cytoplasm|membrane|	receptor-mediated endocytosis|signal transduction|positive regulation of Rac GTPase activity|positive regulation of Cdc42 GTPase activity|	SH3 domain binding|Rac GTPase activator activity|	8	1.9	12.5	8	0.4	0.372	1.9	12.6	0.00344	1	3.4	0	0	0
ENSMUSG00000010608	RBM25	RNA binding motif protein 25	nucleus|spliceosomal complex|cytoplasm|nuclear speck|	regulation of alternative mRNA splicing, via spliceosome|mRNA processing|RNA splicing|regulation of apoptotic process|	nucleotide binding|mRNA binding|protein binding|poly(A) RNA binding|	6	2.3	1.3	7	1.5	12.1	1.8	12.6	0.00344	0.9	3.4	0	0	0
ENSMUSG00000001445	MRPL10	mitochondrial ribosomal protein L10	mitochondrion|mitochondrial large ribosomal subunit|ribonucleoprotein complex|	translation|ribosome biogenesis|	structural constituent of ribosome|poly(A) RNA binding|	10	2.2	4.03	9	2.1	8.97	2.1	12.6	0.00344	1.1	3.6	0	0	0
ENSMUSG00000029623	PDAP1	PDGFA associated protein 1	None	signal transduction|cell proliferation|	poly(A) RNA binding|	10	1	5.67	10	1.1	7.34	1.1	12.6	0.00344	0.5	1.9	0	0	0
ENSMUSG00000031891	HSD11B2	hydroxysteroid (11-beta) dehydrogenase 2	endoplasmic reticulum|	response to hypoxia|regulation of blood volume by renal aldosterone|glucocorticoid biosynthetic process|female pregnancy|response to food|response to insulin|response to drug|response to glucocorticoid|oxidation-reduction process|	11-beta-hydroxysteroid dehydrogenase [NAD(P)] activity|steroid binding|NAD binding|	10	1.9	7.92	10	1.7	5.15	1.9	12.6	0.00344	0.7	3.1	0	0	0
ENSMUSG00000061028	CLASRP	CLK4-associating serine/arginine rich protein	nucleus|	mRNA processing|RNA splicing|	None	10	-1.6	11.7	9	-1.5	1.19	-1.6	12.6	0.00344	-3	-0.7	0	0	0
ENSMUSG00000096039	D830030K20RIK	RIKEN cDNA D830030K20 gene	cellular_component|	biological_process|	molecular_function|	7	0.3	0.373	9	2.4	15	2.4	12.6	0.00344	1.3	4.4	0	0	0
ENSMUSG00000029657	HSPH1	heat shock 105kDa/110kDa protein 1	extracellular region|nucleus|cytoplasm|cytosol|microtubule|extracellular vesicular exosome|endocytic vesicle lumen|	response to unfolded protein|positive regulation of MHC class I biosynthetic process|chaperone mediated protein folding requiring cofactor|positive regulation of NK T cell activation|	protein binding|ATP binding|alpha-tubulin binding|	10	1.1	6.02	9	2.1	8.08	1.3	12.6	0.00344	0.6	2.9	0	0	0
ENSMUSG00000047108	DNAJB7	DnaJ (Hsp40) homolog, subfamily B, member 7	None	None	chaperone binding|	8	1.8	8.93	9	1	5.46	1.7	12.6	0.00344	0.8	2.9	0	0	0
ENSMUSG00000076514	IGKV17-121	immunoglobulin kappa variable 17-121	None	None	None	10	2	12.1	9	1	1.59	1.6	12.6	0.00344	0.8	3.3	0	0	0
ENSMUSG00000027598	ITCH	itchy E3 ubiquitin protein ligase	nucleus|nucleus|cytoplasm|cytosol|plasma membrane|cell cortex|membrane|cytoplasmic vesicle|	regulation of cell growth|positive regulation of T cell anergy|ubiquitin-dependent protein catabolic process|ubiquitin-dependent protein catabolic process|apoptotic process|inflammatory response|Notch signaling pathway|protein ubiquitination|negative regulation of NF-kappaB transcription factor activity|negative regulation of type I interferon production|protein K29-linked ubiquitination|nucleoti…	ubiquitin-protein transferase activity|ubiquitin-protein transferase activity|ubiquitin-protein transferase activity|protein binding|ligase activity|ribonucleoprotein complex binding|CXCR chemokine receptor binding|	9	1.3	7.89	10	1.4	5.09	1.4	12.6	0.00344	0.7	3.3	0	0	0
ENSMUSG00000096878	GM21655	predicted gene, 21655	None	None	None	4	0	0	5	3.3	14.5	3.2	12.6	0.00344	2.3	6	0	0	0
ENSMUSG00000036114	RPP25L	ribonuclease P/MRP 25kDa subunit-like	nucleus|	None	poly(A) RNA binding|	6	1.2	0.945	7	2	12.5	1.7	12.6	0.00344	1	3.4	0	0	0
ENSMUSG00000024454	HDAC3	histone deacetylase 3	histone deacetylase complex|nucleus|nucleus|nucleoplasm|cytoplasm|spindle microtubule|transcriptional repressor complex|	negative regulation of transcription from RNA polymerase II promoter|negative regulation of transcription from RNA polymerase II promoter|transcription, DNA-templated|protein deacetylation|Notch signaling pathway|regulation of mitotic cell cycle|chromatin modification|circadian regulation of gene expression|regulation of multicellular organism growth|negative regulation of apoptotic process|cellu…	chromatin binding|transcription corepressor activity|transcription corepressor activity|histone deacetylase activity|histone deacetylase activity|protein binding|transcription factor binding|transcription factor binding|enzyme binding|cyclin binding|chromatin DNA binding|NAD-dependent histone deacetylase activity (H3-K14 specific)|protein deacetylase activity|histone deacetylase binding|NAD-depen…	5	1.5	4.3	6	2	9.16	1.8	12.6	0.00344	0.9	3.8	0	0	0
ENSMUSG00000040274	CDK6	cyclin-dependent kinase 6	cyclin-dependent protein kinase holoenzyme complex|ruffle|nucleus|cytoplasm|cytosol|	G1/S transition of mitotic cell cycle|mitotic cell cycle|positive regulation of cell-matrix adhesion|type B pancreatic cell development|protein phosphorylation|cell cycle arrest|negative regulation of cell proliferation|response to virus|regulation of gene expression|regulation of gene expression|astrocyte development|dentate gyrus development|lateral ventricle development|gliogenesis|cell dediff…	cyclin-dependent protein serine/threonine kinase activity|protein binding|ATP binding|cyclin binding|	5	1.6	5.39	6	1.8	7.54	1.7	12.5	0.00352	0.7	3.2	0	0	0
ENSMUSG00000001128	CFP	complement factor properdin	extracellular region|extracellular space|extracellular matrix|	immune response|complement activation|complement activation, alternative pathway|regulation of complement activation|defense response to bacterium|innate immune response|	None	10	-0.9	2.63	10	-1.3	10.6	-1.2	12.5	0.00352	-2.5	-0.5	0	0	0
ENSMUSG00000038522	AI317395	expressed sequence AI317395	cellular_component|plasma membrane|membrane|integral component of membrane|	transport|ion transport|sodium ion transport|biological_process|carbohydrate transport|transmembrane transport|	molecular_function|symporter activity|	10	-1.5	3.12	10	4.3	15.5	4.3	12.5	0.00352	1	7.7	0	0	0
ENSMUSG00000095821	TCSTV3	2-cell-stage, variable group, member 3	cellular_component|	biological_process|	molecular_function|	9	2.3	2.68	7	2.2	10.2	2.2	12.5	0.00352	0.9	3.9	0	0	0
ENSMUSG00000029464	GPN3	GPN-loop GTPase 3	protein complex|	None	GTP binding|	6	0.2	0.0795	9	1.3	12.7	1.3	12.5	0.00352	0.7	2.4	0	0	0
ENSMUSG00000016308	UBE2A	ubiquitin-conjugating enzyme E2A	chromatin|nuclear chromatin|XY body|cytosol|HULC complex|	protein polyubiquitination|in utero embryonic development|antigen processing and presentation of peptide antigen via MHC class I|DNA repair|postreplication repair|ubiquitin-dependent protein catabolic process|positive regulation of cell proliferation|response to UV|histone H2A ubiquitination|protein autoubiquitination|maternal process involved in female pregnancy|protein K48-linked ubiquitination…	ubiquitin-protein transferase activity|protein binding|ATP binding|acid-amino acid ligase activity|ubiquitin protein ligase binding|	10	2.1	9	10	1.6	4.32	1.9	12.5	0.00352	0.9	3.3	0	0	0
ENSMUSG00000057003	MYH4	myosin, heavy chain 4, skeletal muscle	muscle myosin complex|myofibril|sarcomere|myosin filament|	ATP catabolic process|muscle contraction|response to activity|actin filament-based movement|muscle filament sliding|membrane organization|	microfilament motor activity|double-stranded RNA binding|actin binding|calmodulin binding|ATP binding|	10	0.8	0.985	10	2.4	13.4	2.2	12.5	0.00352	1.4	4.2	0	0	0
ENSMUSG00000056124	B4GALT6	UDP-Gal:betaGlcNAc beta 1,4- galactosyltransferase, polypeptide 6	Golgi membrane|integral component of membrane|Golgi cisterna membrane|	carbohydrate metabolic process|keratan sulfate biosynthetic process|protein N-linked glycosylation via asparagine|glycosaminoglycan metabolic process|keratan sulfate metabolic process|post-translational protein modification|cellular protein metabolic process|small molecule metabolic process|	galactosyltransferase activity|metal ion binding|	10	2.1	6.55	10	3.3	7.8	2.7	12.5	0.00352	1.3	5.2	0	0	0
ENSMUSG00000036564	NDRG4	NDRG family member 4	cytoplasm|cytosol|	response to stress|cell growth|cell differentiation|	None	10	2.4	1.71	10	2.4	11.1	2.4	12.5	0.00352	0.8	3.7	0	0	0
ENSMUSG00000031883	CAR7	carbonic anhydrase 7	cytoplasm|cytosol|	one-carbon metabolic process|positive regulation of synaptic transmission, GABAergic|positive regulation of cellular pH reduction|regulation of chloride transport|	carbonate dehydratase activity|zinc ion binding|lyase activity|metal ion binding|	10	1.8	13.1	10	-0.3	0.374	1.9	12.5	0.00352	0.9	3.4	0	0	0
ENSMUSG00000029363	RFC5	replication factor C (activator 1) 5, 36.5kDa	nucleoplasm|DNA replication factor C complex|	mitotic cell cycle|telomere maintenance via recombination|telomere maintenance|DNA replication|DNA replication|DNA strand elongation involved in DNA replication|DNA repair|DNA repair|transcription-coupled nucleotide-excision repair|nucleotide-excision repair|nucleotide-excision repair, DNA gap filling|telomere maintenance via semi-conservative replication|	DNA binding|protein binding|ATP binding|nucleoside-triphosphatase activity|enzyme binding|	7	1.6	2.47	8	2.5	11.3	2	12.5	0.00352	0.9	4.3	0	0	0
ENSMUSG00000063556	GM10132	ribosomal protein L23A pseudogene	None	None	None	5	2.8	2.07	6	2.4	11	2.5	12.4	0.0036	1.5	4.6	0	0	0
ENSMUSG00000079378	GM8279	predicted gene 8279	cellular_component|	biological_process|	molecular_function|	8	1.4	6.24	7	2.4	8.62	2.1	12.4	0.0036	1	3.8	0	0	0
ENSMUSG00000032583	MON1A	MON1 secretory trafficking family member A	None	None	None	10	1.6	8.52	7	1.5	4.26	1.6	12.4	0.0036	0.7	2.7	0	0	0
ENSMUSG00000032796	LAMA1	laminin, alpha 1	extracellular region|proteinaceous extracellular matrix|basement membrane|laminin-1 complex|laminin-1 complex|laminin-3 complex|extracellular space|cell-cell junction|extracellular matrix|	morphogenesis of an epithelial sheet|cell adhesion|cell surface receptor signaling pathway|axon guidance|regulation of cell adhesion|extracellular matrix organization|regulation of cell migration|establishment of epithelial cell apical/basal polarity|regulation of embryonic development|epithelial tube branching involved in lung morphogenesis|branching involved in salivary gland morphogenesis|reti…	receptor binding|extracellular matrix structural constituent|protein binding|glycosphingolipid binding|	10	3.1	10.5	10	1.9	4.2	2.9	12.4	0.0036	1.3	4.8	0	0	0
ENSMUSG00000095318	GM8024	predicted gene 8024	cellular_component|	biological_process|	molecular_function|	4	1.3	5.37	3	2.2	8.1	1.6	12.4	0.0036	0.9	3.6	0	0	0
ENSMUSG00000058546	RPL23A	ribosomal protein L23a	nucleus|cytosol|cytosolic large ribosomal subunit|cytosolic large ribosomal subunit|TORC2 complex|extracellular vesicular exosome|	nuclear-transcribed mRNA catabolic process, nonsense-mediated decay|translation|translation|translational initiation|translational elongation|translational termination|SRP-dependent cotranslational protein targeting to membrane|cell proliferation|gene expression|viral process|RNA metabolic process|mRNA metabolic process|viral life cycle|viral transcription|cellular protein metabolic process|	nucleotide binding|structural constituent of ribosome|protein binding|rRNA binding|poly(A) RNA binding|	5	2.8	2.05	6	2.4	11	2.5	12.4	0.0036	1.5	4.7	0	0	0
ENSMUSG00000029111	NELFA	negative elongation factor complex member A	nucleus|nucleoplasm|cytoplasm|NELF complex|	transcription from RNA polymerase II promoter|transcription elongation from RNA polymerase II promoter|multicellular organismal development|gene expression|viral process|negative regulation of transcription elongation from RNA polymerase II promoter|positive regulation of viral transcription|	chromatin binding|protein binding|	7	2.2	10.8	6	1.2	3.33	1.9	12.4	0.0036	0.8	3.7	0	0	0
ENSMUSG00000030871	EARS2	glutamyl-tRNA synthetase 2, mitochondrial	mitochondrion|mitochondrial matrix|	tRNA aminoacylation for protein translation|glutamyl-tRNA aminoacylation|gene expression|tRNA aminoacylation for mitochondrial protein translation|	tRNA binding|glutamate-tRNA ligase activity|ATP binding|glutamate-tRNA(Gln) ligase activity|	5	1.9	7.31	6	1.5	5.9	1.7	12.4	0.0036	0.8	3.2	0	0	0
ENSMUSG00000004221	IKBKG	inhibitor of kappa light polypeptide gene enhancer in B-cells, kinase gamma	intracellular|nucleus|cytoplasm|cytosol|IkappaB kinase complex|IkappaB kinase complex|IkappaB kinase complex|	activation of MAPK activity|B cell homeostasis|toll-like receptor signaling pathway|MyD88-dependent toll-like receptor signaling pathway|MyD88-independent toll-like receptor signaling pathway|transcription, DNA-templated|apoptotic process|inflammatory response|immune response|cellular response to DNA damage stimulus|I-kappaB kinase/NF-kappaB signaling|activation of NF-kappaB-inducing kinase activ…	signal transducer activity|protein binding|protein domain specific binding|protein homodimerization activity|metal ion binding|protein heterodimerization activity|	2	1.5	4.13	6	3.4	9.93	3	12.4	0.0036	1.1	6	0	0	0
ENSMUSG00000078276	GM14190	N/A	None	None	None	9	1.7	11.9	9	1.2	1.3	1.7	12.4	0.0036	0.8	2.9	0	0	0
ENSMUSG00000078656	VPS25	vacuolar protein sorting 25 homolog (S. cerevisiae)	nucleus|nucleoplasm|nucleolus|mitochondrion|cytosol|endosome membrane|extracellular vesicular exosome|	transcription, DNA-templated|regulation of transcription, DNA-templated|protein transport|endosomal transport|membrane organization|	protein binding|protein homodimerization activity|	7	1.3	8.4	4	1.3	4.43	1.3	12.4	0.0036	0.7	3.1	0	0	0
ENSMUSG00000000131	XPO6	exportin 6	nucleus|nucleus|nucleolus|cytoplasm|cytoplasm|plasma membrane|	protein export from nucleus|	protein binding|Ran GTPase binding|protein transporter activity|	10	-1.9	11.4	9	-0.8	2.42	-1.3	12.4	0.0036	-3.5	-0.6	0	0	0
ENSMUSG00000032633	FLCN	folliculin	nucleus|cytoplasm|plasma membrane|midbody|cell-cell contact zone|	negative regulation of transcription from RNA polymerase II promoter|negative regulation of transcription from RNA polymerase II promoter|in utero embryonic development|regulation of protein phosphorylation|positive regulation of protein phosphorylation|cell-cell junction assembly|positive regulation of gene expression|negative regulation of gene expression|negative regulation of mitochondrion or…	protein binding|protein complex binding|	10	-2.5	7.89	10	-1.5	5.58	-1.9	12.3	0.00369	-3.7	-0.6	0	0	0
ENSMUSG00000062646	GANC	glucosidase, alpha; neutral C	None	carbohydrate metabolic process|	alpha-glucosidase activity|carbohydrate binding|maltose alpha-glucosidase activity|	10	0.6	2.18	10	2	11.9	1.9	12.3	0.00369	0.8	3.5	0	0	0
ENSMUSG00000037742	EEF1A1	eukaryotic translation elongation factor 1 alpha 1	extracellular space|nucleus|nucleolus|cytoplasm|cytoplasm|cytoplasm|cytosol|eukaryotic translation elongation factor 1 complex|plasma membrane|membrane|extracellular vesicular exosome|	GTP catabolic process|transcription, DNA-templated|regulation of transcription, DNA-templated|translation|translational elongation|gene expression|cellular protein metabolic process|cellular response to epidermal growth factor stimulus|	translation elongation factor activity|GTPase activity|protein binding|GTP binding|protein kinase binding|poly(A) RNA binding|	5	2.7	5.48	5	1.5	8.54	1.8	12.3	0.00369	0.9	4.1	0	0	0
ENSMUSG00000026618	IARS2	isoleucyl-tRNA synthetase 2, mitochondrial	cytoplasm|mitochondrion|mitochondrial matrix|	tRNA aminoacylation for protein translation|isoleucyl-tRNA aminoacylation|regulation of translational fidelity|gene expression|	aminoacyl-tRNA editing activity|isoleucine-tRNA ligase activity|ATP binding|	10	1.8	11.7	7	1.3	1.23	1.7	12.3	0.00369	0.8	3.1	0	0	0
ENSMUSG00000018707	DYNC1H1	dynein, cytoplasmic 1, heavy chain 1	centrosome|cytosol|cytoplasmic dynein complex|microtubule|membrane|extracellular vesicular exosome|	G2/M transition of mitotic cell cycle|mitotic cell cycle|ATP catabolic process|transport|microtubule-based movement|mitotic spindle organization|cell death|antigen processing and presentation of exogenous peptide antigen via MHC class II|cytoplasmic mRNA processing body assembly|stress granule assembly|	microtubule motor activity|protein binding|ATP binding|ATPase activity|poly(A) RNA binding|	8	1.8	6.39	8	1.8	6.25	1.8	12.3	0.00369	0.9	3	0	0	0
ENSMUSG00000003308	KEAP1	kelch-like ECH-associated protein 1	nucleus|cytoplasm|endoplasmic reticulum|microtubule organizing center|midbody|Cul3-RING ubiquitin ligase complex|	in utero embryonic development|transcription, DNA-templated|regulation of transcription, DNA-templated|proteasomal ubiquitin-independent protein catabolic process|protein ubiquitination|protein ubiquitination|regulation of epidermal cell differentiation|cellular response to interleukin-4|	protein binding|	10	1.9	12.7	6	0	0	1.8	12.3	0.00369	0.7	3.1	0	0	0
ENSMUSG00000024181	MRPL28	mitochondrial ribosomal protein L28	nucleus|cytoplasm|mitochondrion|mitochondrial ribosome|mitochondrial ribosome|	translation|	structural constituent of ribosome|protein binding|poly(A) RNA binding|	9	1.9	8.31	9	1.4	4.69	1.8	12.3	0.00369	0.7	2.9	0	0	0
ENSMUSG00000042249	ADRBK2	adrenergic, beta, receptor kinase 2	None	protein phosphorylation|signal transduction|receptor internalization|termination of G-protein coupled receptor signaling pathway|	protein kinase activity|G-protein coupled receptor kinase activity|ATP binding|beta-adrenergic receptor kinase activity|	8	1.7	2.16	9	2.5	11.1	2.2	12.3	0.00369	1.1	4.4	0	0	0
ENSMUSG00000014873	SURF2	surfeit 2	cellular_component|nucleus|nucleolus|plasma membrane|	biological_process|	molecular_function|	10	-1.1	2.97	10	-1.7	9.83	-1.5	12.2	0.00377	-3	-0.7	0	0	0
ENSMUSG00000017548	SUZ12	SUZ12 polycomb repressive complex 2 subunit	sex chromatin|nucleus|nucleoplasm|ESC/E(Z) complex|ESC/E(Z) complex|	negative regulation of transcription from RNA polymerase II promoter|transcription, DNA-templated|positive regulation of cell proliferation|histone methylation|histone ubiquitination|negative regulation of cell differentiation|	chromatin binding|protein binding|methylated histone binding|histone methyltransferase activity|sequence-specific DNA binding|metal ion binding|	10	-1.4	9.46	10	-1.2	3.16	-1.3	12.2	0.00377	-2.5	-0.5	0	0	0
ENSMUSG00000049969	PLEKHF2	pleckstrin homology domain containing, family F (with FYVE domain) member 2	endoplasmic reticulum|transport vesicle|early endosome membrane|	protein transport|	protein binding|metal ion binding|	9	1.7	1.48	9	1.7	11	1.7	12.2	0.00377	0.8	3	0	0	0
ENSMUSG00000053801	GRWD1	glutamate-rich WD repeat containing 1	nucleus|nucleolus|cytoplasm|	None	poly(A) RNA binding|	9	1.8	8.06	9	2	4.55	2	12.2	0.00377	0.9	3.6	0	0	0
ENSMUSG00000009079	EWSR1	EWS RNA-binding protein 1	nucleus|cytoplasm|plasma membrane|	transcription, DNA-templated|regulation of transcription, DNA-templated|	nucleotide binding|RNA binding|protein binding|calmodulin binding|zinc ion binding|identical protein binding|poly(A) RNA binding|	10	1	2.75	10	3.3	10.4	2.1	12.2	0.00377	0.7	4.9	0	0	0
ENSMUSG00000015880	NCAPG	non-SMC condensin I complex, subunit G	condensin complex|nucleus|cytoplasm|centrosome|cytosol|actin cytoskeleton|membrane|	mitotic cell cycle|mitotic chromosome condensation|mitotic chromosome condensation|	protein binding|	7	1.8	13.2	7	-0.5	0.467	1.7	12.2	0.00377	0.8	3.3	0	0	0
ENSMUSG00000091511	VMN2R87	vomeronasal 2, receptor 87	cellular_component|plasma membrane|membrane|integral component of membrane|	signal transduction|G-protein coupled receptor signaling pathway|biological_process|	molecular_function|signal transducer activity|G-protein coupled receptor activity|	9	2.3	10.3	9	1	5.92	2.2	12.2	0.00377	0.6	3.4	0	0	0
ENSMUSG00000052488	CHERP	calcium homeostasis endoplasmic reticulum protein	cytoplasm|membrane|sarcoplasmic reticulum membrane|perinuclear region of cytoplasm|	RNA processing|cellular calcium ion homeostasis|nervous system development|negative regulation of cell proliferation|release of sequestered calcium ion into cytosol|positive regulation of NFAT protein import into nucleus|	protein binding|ion channel binding|poly(A) RNA binding|	8	2.1	10.3	8	1.6	2.4	2	12.1	0.00386	1	3.8	0	0	0
ENSMUSG00000038733	WDR26	WD repeat domain 26	nucleus|cytoplasm|	None	None	10	-1.2	4.24	10	-2.5	9.24	-1.3	12.1	0.00386	-3.7	-0.4	0	0	0
ENSMUSG00000045216	HS6ST1	heparan sulfate 6-O-sulfotransferase 1	Golgi membrane|integral component of plasma membrane|	angiogenesis|carbohydrate metabolic process|glycosaminoglycan biosynthetic process|heparan sulfate proteoglycan biosynthetic process, enzymatic modification|glycosaminoglycan metabolic process|small molecule metabolic process|lung alveolus development|neuron development|labyrinthine layer blood vessel development|	sulfotransferase activity|	10	0.7	0.885	10	2.6	13.2	2.3	12.1	0.00386	0.8	3.9	0	0	0
ENSMUSG00000079519	GM14743	predicted gene 14743	cellular_component|	biological_process|	molecular_function|	8	2.4	15.1	8	-0.6	0.812	2.4	12.1	0.00386	1	4.7	0	0	0
ENSMUSG00000025153	FASN	fatty acid synthase	cytoplasm|mitochondrion|Golgi apparatus|cytosol|plasma membrane|membrane|melanosome|glycogen granule|extracellular vesicular exosome|	osteoblast differentiation|acetyl-CoA metabolic process|energy reserve metabolic process|fatty acid metabolic process|fatty acid biosynthetic process|vitamin metabolic process|water-soluble vitamin metabolic process|pantothenate metabolic process|triglyceride biosynthetic process|positive regulation of cellular metabolic process|long-chain fatty-acyl-CoA biosynthetic process|cellular lipid metabo…	fatty acid synthase activity|[acyl-carrier-protein] S-acetyltransferase activity|[acyl-carrier-protein] S-malonyltransferase activity|3-oxoacyl-[acyl-carrier-protein] synthase activity|3-oxoacyl-[acyl-carrier-protein] reductase (NADPH) activity|3-hydroxypalmitoyl-[acyl-carrier-protein] dehydratase activity|enoyl-[acyl-carrier-protein] reductase (NADPH, B-specific) activity|oleoyl-[acyl-carrier-pr…	10	2.1	9.3	10	3	3.71	2.4	12.1	0.00386	0.8	4.1	0	0	0
ENSMUSG00000059273	ZC3H4	zinc finger CCCH-type containing 4	None	None	poly(A) RNA binding|metal ion binding|	8	1.3	3.57	7	2.1	8.92	2.1	12.1	0.00386	1.1	3.6	0	0	0
ENSMUSG00000032518	RPSA	ribosomal protein SA	nucleus|cytoplasm|cytoplasm|cytosol|plasma membrane|membrane|cytosolic small ribosomal subunit|90S preribosome|extracellular vesicular exosome|	ribosomal small subunit assembly|nuclear-transcribed mRNA catabolic process, nonsense-mediated decay|endonucleolytic cleavage in ITS1 to separate SSU-rRNA from 5.8S rRNA and LSU-rRNA from tricistronic rRNA transcript (SSU-rRNA, 5.8S rRNA, LSU-rRNA)|endonucleolytic cleavage to generate mature 3'-end of SSU-rRNA from (SSU-rRNA, 5.8S rRNA, LSU-rRNA)|rRNA export from nucleus|translation|translation|t…	structural constituent of ribosome|laminin receptor activity|protein binding|ribosome binding|laminin binding|poly(A) RNA binding|	3	1.6	1.1	3	2.8	11.9	2.8	12	0.00394	1.9	5	0	0	0
ENSMUSG00000002496	TSC2	tuberous sclerosis 2	nucleus|cytoplasm|cytoplasm|Golgi apparatus|cytosol|cytosol|caveola|membrane|dendrite|growth cone|TSC1-TSC2 complex|neuronal cell body|perinuclear region of cytoplasm|	response to hypoxia|neural tube closure|negative regulation of protein kinase activity|protein import into nucleus|endocytosis|acute-phase response|cell cycle arrest|epidermal growth factor receptor signaling pathway|heart development|protein localization|negative regulation of cell proliferation|insulin receptor signaling pathway|fibroblast growth factor receptor signaling pathway|phosphatidylin…	GTPase activator activity|protein binding|phosphatase binding|protein homodimerization activity|protein heterodimerization activity|14-3-3 protein binding|	9	2.3	9.09	8	1.3	4.48	1.9	12	0.00394	0.8	3.5	0	0	0
ENSMUSG00000057342	SPHK2	sphingosine kinase 2	lysosomal membrane|cytosol|cytosol|membrane|	blood vessel development|sphingolipid metabolic process|sphinganine-1-phosphate biosynthetic process|sphingosine metabolic process|protein kinase C-activating G-protein coupled receptor signaling pathway|brain development|cell proliferation|positive regulation of cell proliferation|sphingolipid biosynthetic process|negative regulation of apoptotic process|small molecule metabolic process|lipid ph…	NAD+ kinase activity|diacylglycerol kinase activity|protein binding|ATP binding|sphinganine kinase activity|Ras GTPase binding|D-erythro-sphingosine kinase activity|	10	2	10.7	10	3.3	3.25	2.1	12	0.00394	0.9	4.4	0	0	0
ENSMUSG00000048411	GM597	predicted gene 597	cellular_component|	biological_process|	molecular_function|	10	3.5	9.57	10	3.2	2.96	3.3	12	0.00394	1.1	6	0	0	0
ENSMUSG00000019982	MYB	v-myb avian myeloblastosis viral oncogene homolog	nuclear matrix|	G1/S transition of mitotic cell cycle|negative regulation of transcription from RNA polymerase II promoter|in utero embryonic development|chromatin remodeling|transcription, DNA-templated|regulation of transcription, DNA-templated|calcium ion transport|blood coagulation|B cell differentiation|positive regulation of T-helper cell differentiation|negative regulation of transcription, DNA-templated|…	RNA polymerase II core promoter proximal region sequence-specific DNA binding|RNA polymerase II core promoter proximal region sequence-specific DNA binding transcription factor activity involved in positive regulation of transcription|chromatin binding|protein binding|	8	1.8	7.34	10	1.8	5	1.8	12	0.00394	0.9	3.2	0	0	0
ENSMUSG00000038417	FIG4	FIG4 homolog, SAC1 lipid phosphatase domain containing (S. cerevisiae)	Golgi membrane|endosome membrane|early endosome membrane|late endosome membrane|	phospholipid metabolic process|phosphatidylinositol biosynthetic process|vacuole organization|locomotory behavior|cell death|positive regulation of neuron projection development|dephosphorylation|negative regulation of myelination|myelin assembly|phosphatidylinositol-3-phosphate biosynthetic process|pigmentation|small molecule metabolic process|neuron development|	phosphatidylinositol-3-phosphatase activity|protein binding|phosphatidylinositol-4-phosphate phosphatase activity|phosphatidylinositol-3,5-bisphosphate 5-phosphatase activity|	10	2.7	6.33	9	2	6.12	2.1	12	0.00394	0.8	3.9	0	0	0
ENSMUSG00000029196	TADA2B	transcriptional adaptor 2B	STAGA complex|SAGA-type complex|	chromatin organization|transcription, DNA-templated|regulation of transcription, DNA-templated|	DNA binding|chromatin binding|zinc ion binding|	9	-0.8	3.27	10	-2.4	12.4	-2.2	12	0.00394	-4.2	-0.6	0	0	0
ENSMUSG00000008683	RPS15A	ribosomal protein S15a	cytoplasm|cytosol|membrane|cytosolic small ribosomal subunit|extracellular vesicular exosome|	nuclear-transcribed mRNA catabolic process, nonsense-mediated decay|translation|translation|translation|translational initiation|translational elongation|translational termination|SRP-dependent cotranslational protein targeting to membrane|positive regulation of cell proliferation|response to virus|gene expression|viral process|RNA metabolic process|mRNA metabolic process|viral life cycle|viral t…	RNA binding|structural constituent of ribosome|structural constituent of ribosome|poly(A) RNA binding|	3	1.7	7.66	5	1.5	4.87	1.6	12	0.00394	0.9	3.5	0	0	0
ENSMUSG00000032096	ARCN1	archain 1	cytoplasm|endoplasmic reticulum|Golgi apparatus|cytosol|membrane|COPI vesicle coat|clathrin adaptor complex|intracellular membrane-bounded organelle|	intracellular protein transport|retrograde vesicle-mediated transport, Golgi to ER|adult locomotory behavior|cerebellar Purkinje cell layer maturation|pigmentation|COPI coating of Golgi vesicle|membrane organization|	poly(A) RNA binding|	3	1.3	2.17	6	1.4	10.2	1.4	12	0.00394	0.7	2.6	0	0	0
ENSMUSG00000032409	ATR	ATR serine/threonine kinase	XY body|nucleoplasm|chromosome|PML body|	DNA damage checkpoint|DNA replication|DNA repair|cellular response to DNA damage stimulus|cell cycle|multicellular organismal development|negative regulation of DNA replication|peptidyl-serine phosphorylation|cellular response to UV|response to drug|regulation of protein binding|positive regulation of DNA damage response, signal transduction by p53 class mediator|protein autophosphorylation|cellu…	DNA binding|protein kinase activity|protein serine/threonine kinase activity|protein binding|ATP binding|MutLalpha complex binding|MutSalpha complex binding|	8	1.8	8.16	6	2.5	4.39	2.1	12	0.00394	0.9	3.8	0	0	0
ENSMUSG00000070544	TOP1	topoisomerase (DNA) I	nuclear chromosome|cytoplasmic mRNA processing body|nucleus|nucleoplasm|nucleolus|replication fork protection complex|perikaryon|	ATP catabolic process|DNA replication|DNA topological change|DNA topological change|chromatin remodeling|chromosome segregation|programmed cell death|viral process|phosphorylation|embryonic cleavage|response to drug|	DNA binding|chromatin binding|DNA topoisomerase type I activity|DNA topoisomerase type I activity|DNA topoisomerase type II (ATP-hydrolyzing) activity|protein binding|poly(A) RNA binding|	7	1.4	5.25	9	1.1	7.41	1.2	12	0.00394	0.5	2.4	0	0	0
ENSMUSG00000028792	AK2	adenylate kinase 2	mitochondrial inner membrane|mitochondrial intermembrane space|cytosol|extracellular vesicular exosome|sperm mitochondrial sheath|	liver development|oxidative phosphorylation|ADP biosynthetic process|brain development|nucleobase-containing small molecule interconversion|small molecule metabolic process|AMP metabolic process|dATP metabolic process|nucleotide phosphorylation|nucleotide phosphorylation|nucleobase-containing small molecule metabolic process|response to thyroid hormone|	adenylate kinase activity|ATP binding|	9	1.6	9.91	6	2.4	2.97	1.8	12	0.00394	0.7	3.3	0	0	0
ENSMUSG00000005687	BCAS2	breast carcinoma amplified sequence 2	nucleus|spliceosomal complex|nucleolus|cell junction|	RNA splicing, via transesterification reactions|mRNA processing|RNA splicing|	protein binding|	9	2.3	12.2	9	-0.4	0.223	2.3	11.9	0.00403	1.2	4.1	0	0	0
ENSMUSG00000029551	PSMG3	proteasome (prosome, macropain) assembly chaperone 3	None	None	None	6	2.2	6.34	8	1.7	6.19	1.7	11.9	0.00403	0.8	3.4	0	0	0
ENSMUSG00000025403	SHMT2	serine hydroxymethyltransferase 2 (mitochondrial)	mitochondrion|mitochondrial inner membrane|mitochondrial intermembrane space|mitochondrial matrix|microtubule cytoskeleton|mitochondrial nucleoid|extracellular vesicular exosome|	L-serine biosynthetic process|one-carbon metabolic process|positive regulation of cell proliferation|glycine biosynthetic process from serine|tetrahydrofolate interconversion|protein homotetramerization|	chromatin binding|glycine hydroxymethyltransferase activity|L-allo-threonine aldolase activity|amino acid binding|pyridoxal phosphate binding|identical protein binding|	7	2.1	3.69	7	1.8	8.66	2	11.9	0.00403	1	3.8	0	0	0
ENSMUSG00000020708	PSMC5	proteasome (prosome, macropain) 26S subunit, ATPase, 5	proteasome complex|nucleus|nucleoplasm|cytoplasm|cytosol|membrane|inclusion body|proteasome accessory complex|cytoplasmic vesicle|nuclear proteasome complex|cytosolic proteasome complex|extracellular vesicular exosome|blood microparticle|	G1/S transition of mitotic cell cycle|protein polyubiquitination|mitotic cell cycle|antigen processing and presentation of peptide antigen via MHC class I|antigen processing and presentation of exogenous peptide antigen via MHC class I, TAP-dependent|ATP catabolic process|transcription from RNA polymerase II promoter|regulation of cellular amino acid metabolic process|apoptotic process|DNA damage…	transcription cofactor activity|protein binding|ATP binding|transcription factor binding|ATPase activity|ATPase activity|TBP-class protein binding|thyrotropin-releasing hormone receptor binding|	9	1.5	9.44	7	1.1	3.13	1.4	11.9	0.00403	0.7	2.5	0	0	0
ENSMUSG00000056987	FAM71D	family with sequence similarity 71, member D	nucleus|cytoplasm|	None	None	9	2.5	14.5	8	0.2	0.143	2.5	11.9	0.00403	1.1	4.7	0	0	0
ENSMUSG00000028651	PPIE	peptidylprolyl isomerase E (cyclophilin E)	nucleus|catalytic step 2 spliceosome|	mRNA splicing, via spliceosome|protein peptidyl-prolyl isomerization|protein peptidyl-prolyl isomerization|regulation of transcription, DNA-templated|protein folding|positive regulation of viral genome replication|	nucleotide binding|RNA binding|peptidyl-prolyl cis-trans isomerase activity|protein binding|cyclosporin A binding|poly(A) RNA binding|	4	1.7	4.71	6	1.8	7.54	1.8	11.9	0.00403	1	3.6	0	0	0
ENSMUSG00000037722	GNPNAT1	glucosamine-phosphate N-acetyltransferase 1	Golgi membrane|late endosome|endoplasmic reticulum-Golgi intermediate compartment|cytosol|endosome membrane|	liver development|glucosamine metabolic process|N-acetylglucosamine metabolic process|UDP-N-acetylglucosamine biosynthetic process|UDP-N-acetylglucosamine biosynthetic process|dolichol-linked oligosaccharide biosynthetic process|protein N-linked glycosylation via asparagine|post-translational protein modification|cellular protein metabolic process|	glucosamine 6-phosphate N-acetyltransferase activity|monosaccharide binding|	10	1.7	11.2	10	1.1	1.69	1.6	11.9	0.00403	0.7	2.9	0	0	0
ENSMUSG00000052926	RNASEH2A	ribonuclease H2, subunit A	nucleus|ribonuclease H2 complex|	DNA replication|mismatch repair|RNA catabolic process|RNA phosphodiester bond hydrolysis|RNA phosphodiester bond hydrolysis, endonucleolytic|RNA phosphodiester bond hydrolysis, endonucleolytic|	RNA binding|RNA-DNA hybrid ribonuclease activity|ribonuclease activity|metal ion binding|	10	1.8	5.86	10	1.5	6.46	1.6	11.9	0.00403	0.7	2.7	0	0	0
ENSMUSG00000095533	GM10413	predicted gene 10413	cellular_component|	biological_process|	molecular_function|	8	1.4	3.45	8	2.3	10.4	2.1	11.9	0.00403	0.9	3.8	0	0	0
ENSMUSG00000041670	RIMS1	regulating synaptic membrane exocytosis 1	plasma membrane|cell junction|presynaptic membrane|presynaptic membrane|	protein complex assembly|intracellular protein transport|synaptic transmission|neurotransmitter secretion|visual perception|glutamate secretion|synaptic vesicle exocytosis|calcium ion-dependent exocytosis|regulation of membrane potential|regulated secretory pathway|secretion|regulation of long-term neuronal synaptic plasticity|calcium ion-dependent exocytosis of neurotransmitter|regulation of cat…	small GTPase regulator activity|protein binding|Rab GTPase binding|ion channel binding|poly(A) RNA binding|metal ion binding|	10	2.9	12.8	10	1.2	1.89	2.9	11.9	0.00403	1.1	4.7	0	0	0
ENSMUSG00000079698	VMN2R93	vomeronasal 2, receptor 93	cellular_component|plasma membrane|membrane|integral component of membrane|	signal transduction|G-protein coupled receptor signaling pathway|biological_process|	molecular_function|signal transducer activity|G-protein coupled receptor activity|	10	2	8.83	10	2.2	3.48	2.1	11.9	0.00403	0.8	4	0	0	0
ENSMUSG00000041438	CIRH1A	cirrhosis, autosomal recessive 1A (cirhin)	nucleolus|t-UTP complex|	transcription, DNA-templated|regulation of transcription, DNA-templated|maturation of SSU-rRNA|	protein binding|poly(A) RNA binding|	5	2	11.7	3	1.3	0.959	1.9	11.9	0.00403	1	3.8	0	0	0
ENSMUSG00000095368	GM3012	predicted gene 3012	cellular_component|	biological_process|	molecular_function|	8	1.4	3.45	8	2.3	10.4	2.1	11.9	0.00403	0.9	3.8	0	0	0
ENSMUSG00000031125	3830403N18RIK	RIKEN cDNA 3830403N18 gene	cellular_component|	hematopoietic progenitor cell differentiation|	molecular_function|	6	2.6	5.52	6	2	6.92	2.5	11.8	0.00412	0.8	4.1	0	0	0
ENSMUSG00000094284	VMN1R112	vomeronasal 1 receptor 112	cellular_component|membrane|integral component of membrane|	signal transduction|G-protein coupled receptor signaling pathway|biological_process|response to stimulus|sensory perception of taste|	molecular_function|signal transducer activity|G-protein coupled receptor activity|	7	1	3.1	9	1.4	9.1	1.4	11.8	0.00412	0.6	2.7	0	0	0
ENSMUSG00000073700	KLHL21	kelch-like family member 21	cytoplasm|polar microtubule|Cul3-RING ubiquitin ligase complex|	mitotic nuclear division|protein ubiquitination|protein ubiquitination|regulation of cytokinesis|chromosome passenger complex localization to spindle midzone|	ubiquitin-protein transferase activity|	9	2.5	13.8	9	0.6	0.277	2.3	11.8	0.00412	0.9	4.3	0	0	0
ENSMUSG00000015023	DDX19A	DEAD (Asp-Glu-Ala-Asp) box polypeptide 19A	nuclear pore|cytoplasm|membrane|nuclear membrane|	biological_process|metabolic process|response to zinc ion|protein transport|positive regulation of apoptotic process|mRNA transport|	molecular_function|RNA binding|helicase activity|ATP binding|	9	1.1	3.65	10	1.4	8.51	1.3	11.8	0.00412	0.5	2.4	0	0	0
ENSMUSG00000024271	ELP2	elongator acetyltransferase complex subunit 2	nucleolus|cytoplasm|cytoplasm|transcription elongation factor complex|DNA-directed RNA polymerase II, holoenzyme|Elongator holoenzyme complex|	chromatin organization|regulation of transcription from RNA polymerase II promoter|transcription elongation from RNA polymerase II promoter|regulation of JAK-STAT cascade|	DNA binding|protein kinase binding|	7	1.7	4.9	7	1.9	7.35	1.8	11.8	0.00412	0.8	3.2	0	0	0
ENSMUSG00000026878	RAB14	RAB14, member RAS oncogene family	Golgi membrane|intracellular|lysosome|lysosomal membrane|early endosome|late endosome|rough endoplasmic reticulum|Golgi stack|cytosol|plasma membrane|trans-Golgi network transport vesicle|cytoplasmic vesicle membrane|phagocytic vesicle membrane|early endosome membrane|nuclear outer membrane-endoplasmic reticulum membrane network|intracellular membrane-bounded organelle|phagocytic vesicle|perinucl…	GTP catabolic process|GTP catabolic process|GTP catabolic process|Golgi to endosome transport|Golgi to endosome transport|small GTPase mediated signal transduction|fibroblast growth factor receptor signaling pathway|embryo development|protein transport|vesicle-mediated transport|endocytic recycling|regulation of protein localization|intracellular transport|membrane organization|	GTPase activity|GTPase activity|GTPase activity|protein binding|GTP binding|GDP binding|	10	-1.3	7.4	10	-0.8	5.38	-1	11.8	0.00412	-2	-0.5	0	0	0
ENSMUSG00000075376	RC3H2	ring finger and CCCH-type domains 2	cytoplasmic mRNA processing body|nucleus|cytoplasm|cell surface|membrane|	protein polyubiquitination|	DNA binding|ubiquitin-protein transferase activity|zinc ion binding|poly(A) RNA binding|	10	1.4	4.86	10	2	8.13	1.6	11.8	0.00412	0.9	3	0	0	0
ENSMUSG00000038002	CRAMP1L	Crm, cramped-like (Drosophila)	nucleus|	None	DNA binding|chromatin binding|	10	-0.8	3.77	10	-1.4	9.47	-1.2	11.8	0.00412	-2.2	-0.5	0	0	0
ENSMUSG00000006456	RBM14	RNA binding motif protein 14	nucleus|transcription factor complex|mediator complex|ribonucleoprotein complex|	DNA replication|DNA repair|DNA recombination|transcription from RNA polymerase II promoter|response to hormone|histone deacetylation|intracellular estrogen receptor signaling pathway|glucocorticoid receptor signaling pathway|positive regulation of transcription from RNA polymerase II promoter|	nucleotide binding|RNA polymerase II transcription cofactor activity|RNA binding|protein binding|ligand-dependent nuclear receptor transcription coactivator activity|protein binding, bridging|poly(A) RNA binding|	5	0	0	6	2	12.5	1.9	11.8	0.00412	1.2	3.7	0	0	0
ENSMUSG00000040354	MARS	methionyl-tRNA synthetase	cytoplasm|mitochondrion|cytosol|membrane|extracellular vesicular exosome|	tRNA aminoacylation for protein translation|methionyl-tRNA aminoacylation|gene expression|	tRNA binding|methionine-tRNA ligase activity|ATP binding|	5	2.9	3.4	5	2	9.78	2.1	11.8	0.00412	1.2	5	0	0	0
ENSMUSG00000024056	NDC80	NDC80 kinetochore complex component	chromosome, centromeric region|kinetochore|condensed chromosome kinetochore|condensed nuclear chromosome outer kinetochore|nucleus|cytosol|membrane|Ndc80 complex|	mitotic sister chromatid segregation|establishment of mitotic spindle orientation|mitotic cell cycle|cell cycle|spindle organization|mitotic spindle organization|chromosome segregation|mitotic nuclear division|attachment of spindle microtubules to kinetochore|phosphatidylinositol-mediated signaling|	protein binding|	7	1.9	7.14	8	1.6	5.21	1.8	11.8	0.00412	1	3.3	0	0	0
ENSMUSG00000004535	TAX1BP1	Tax1 (human T-cell leukemia virus type I) binding protein 1	cytosol|	apoptotic process|negative regulation of NF-kappaB transcription factor activity|negative regulation of type I interferon production|negative regulation of apoptotic process|innate immune response|	protein binding|kinase binding|	7	2.8	10.8	8	1	4.61	2.1	11.8	0.00412	0.9	4.7	0	0	0
ENSMUSG00000032604	QARS	glutaminyl-tRNA synthetase	cytoplasm|mitochondrial matrix|cytosol|	tRNA aminoacylation for protein translation|glutaminyl-tRNA aminoacylation|gene expression|	glutamine-tRNA ligase activity|ATP binding|	8	1.4	3.67	8	2.7	10.2	2.4	11.8	0.00412	0.8	4.4	0	0	0
ENSMUSG00000029402	SNRNP35	small nuclear ribonucleoprotein 35kDa (U11/U12)	nucleus|U12-type spliceosomal complex|	mRNA processing|RNA splicing|	nucleotide binding|RNA binding|	10	1.3	6.18	9	2.1	6.63	1.8	11.8	0.00412	0.7	3.2	0	0	0
ENSMUSG00000042660	WDR55	WD repeat domain 55	cellular_component|nucleolus|cytoplasm|	rRNA processing|biological_process|	molecular_function|	8	1.3	7.77	7	1.3	4.45	1.3	11.8	0.00412	0.7	2.9	0	0	0
ENSMUSG00000096372	GM8138	predicted gene 8138	cellular_component|	biological_process|	molecular_function|	4	1.6	5.59	6	1.5	6.6	1.6	11.8	0.00412	0.8	3.3	0	0	0
ENSMUSG00000074115	SAA1	serum amyloid A1	extracellular region|extracellular region|high-density lipoprotein particle|extracellular vesicular exosome|endocytic vesicle lumen|	acute-phase response|positive regulation of cytosolic calcium ion concentration|positive regulation of cytosolic calcium ion concentration|platelet activation|neutrophil chemotaxis|innate immune response|positive regulation of cell adhesion|positive regulation of cell adhesion|macrophage chemotaxis|lymphocyte chemotaxis|regulation of protein secretion|positive regulation of cytokine secretion|pos…	G-protein coupled receptor binding|heparin binding|	8	1.3	6.92	6	1.2	5.26	1.3	11.8	0.00412	0.6	2.4	0	0	0
ENSMUSG00000015027	GALNS	galactosamine (N-acetyl)-6-sulfatase	lysosomal lumen|extracellular vesicular exosome|	carbohydrate metabolic process|glycosaminoglycan metabolic process|keratan sulfate metabolic process|keratan sulfate catabolic process|small molecule metabolic process|	N-acetylgalactosamine-4-sulfatase activity|sulfuric ester hydrolase activity|N-acetylgalactosamine-6-sulfatase activity|metal ion binding|	10	1.6	9.8	8	1.9	2.53	1.7	11.8	0.00412	0.6	4.5	0	0	0
ENSMUSG00000033916	CHMP2A	charged multivesicular body protein 2A	cytosol|membrane|late endosome membrane|extracellular vesicular exosome|	protein transport|viral process|endosomal transport|viral life cycle|establishment of protein localization|regulation of viral process|membrane organization|positive regulation of viral release from host cell|	protein binding|protein domain specific binding|	7	2.8	2.86	6	1.8	10.2	1.9	11.8	0.00412	1	4.4	0	0	0
ENSMUSG00000022663	ATG3	autophagy related 3	cytoplasmic ubiquitin ligase complex|cytosol|	autophagic vacuole assembly|autophagic vacuole assembly|mitochondrion degradation|cellular protein modification process|protein targeting to membrane|protein ubiquitination|mitochondrial fragmentation involved in apoptotic process|nucleophagy|regulation of cilium assembly|	protein binding|Atg8 ligase activity|Atg8 ligase activity|Atg12 ligase activity|small conjugating protein ligase activity|enzyme binding|	9	2.6	6.36	9	2.3	5.93	2.6	11.8	0.00412	1.1	4.3	0	0	0
ENSMUSG00000026872	ZEB2	zinc finger E-box binding homeobox 2	nucleus|	negative regulation of transcription from RNA polymerase II promoter|neural crest cell migration|somitogenesis|neural tube closure|transcription, DNA-templated|nervous system development|hippocampus development|cell proliferation in forebrain|positive regulation of Wnt signaling pathway|positive regulation of JUN kinase activity|positive regulation of melanocyte differentiation|positive regulatio…	sequence-specific DNA binding transcription factor activity|phosphatase regulator activity|sequence-specific DNA binding|metal ion binding|R-SMAD binding|	5	1.5	4.59	5	2	8	1.8	11.8	0.00412	1	3.5	0	0	0
ENSMUSG00000067235	H2-Q10	histocompatibility 2, Q region locus 10	endoplasmic reticulum|Golgi apparatus|Golgi medial cisterna|cell surface|membrane|membrane|integral component of membrane|MHC class I protein complex|extracellular vesicular exosome|endoplasmic reticulum exit site|	positive regulation of T cell mediated cytotoxicity|immune system process|antigen processing and presentation of peptide antigen via MHC class I|immune response|antigen processing and presentation|	receptor binding|beta-2-microglobulin binding|peptide binding|peptide antigen binding|T cell receptor binding|poly(A) RNA binding|TAP binding|protein heterodimerization activity|	10	2.1	9.34	9	1.4	3.38	1.7	11.7	0.00423	0.8	3.8	0	0	0
ENSMUSG00000094127	G530012D18RIK	RIKEN cDNA G530012D1 gene	None	None	None	8	0.5	1.79	8	2.3	11.2	2.1	11.7	0.00423	1.1	4.2	0	0	0
ENSMUSG00000029810	TMEM176B	transmembrane protein 176B	integral component of membrane|nuclear membrane|	organ morphogenesis|cell differentiation|negative regulation of dendritic cell differentiation|	None	10	2.2	9.63	8	1.3	4.06	2	11.7	0.00423	0.8	3.5	0	0	0
ENSMUSG00000030882	DNHD1	dynein heavy chain domain 1	dynein complex|extracellular vesicular exosome|	microtubule-based movement|metabolic process|	microtubule motor activity|	10	2.1	9.34	10	1.6	3.01	2	11.7	0.00423	0.8	3.5	0	0	0
ENSMUSG00000029864	GSTK1	glutathione S-transferase kappa 1	intracellular|mitochondrial inner membrane|mitochondrial matrix|peroxisome|membrane|extracellular vesicular exosome|	glutathione metabolic process|epithelial cell differentiation|oxidation-reduction process|oxidation-reduction process|	glutathione transferase activity|glutathione peroxidase activity|receptor binding|protein disulfide oxidoreductase activity|	9	2.2	8.79	10	1.2	5.51	1.9	11.7	0.00423	0.7	3.3	0	0	0
ENSMUSG00000002633	SHH	sonic hedgehog	extracellular space|extracellular space|nucleus|plasma membrane|cell surface|extracellular matrix|membrane raft|	negative regulation of transcription from RNA polymerase II promoter|patterning of blood vessels|vasculogenesis|metanephros development|branching involved in ureteric bud morphogenesis|cell fate specification|neural crest cell migration|heart looping|positive regulation of neuroblast proliferation|osteoblast development|lymphoid progenitor cell differentiation|determination of left/right asymmetr…	glycoprotein binding|patched binding|calcium ion binding|protein binding|glycosaminoglycan binding|peptidase activity|zinc ion binding|morphogen activity|laminin-1 binding|	9	1.8	6.72	10	1.3	5.65	1.7	11.7	0.00423	0.7	2.8	0	0	0
ENSMUSG00000032462	PIK3CB	phosphatidylinositol-4,5-bisphosphate 3-kinase, catalytic subunit beta	nucleus|cytosol|plasma membrane|phosphatidylinositol 3-kinase complex|	activation of MAPK activity|regulation of cell-matrix adhesion|phospholipid metabolic process|phosphatidylinositol biosynthetic process|cellular calcium ion homeostasis|autophagy|chemotaxis|homophilic cell adhesion|signal transduction|transmembrane receptor protein tyrosine kinase signaling pathway|epidermal growth factor receptor signaling pathway|G-protein coupled receptor signaling pathway|blo…	protein binding|ATP binding|1-phosphatidylinositol-3-kinase activity|phosphatidylinositol 3-kinase activity|1-phosphatidylinositol-4-phosphate 3-kinase activity|insulin receptor substrate binding|phosphatidylinositol-4,5-bisphosphate 3-kinase activity|	10	-1.4	4.8	10	-1.4	7.25	-1.4	11.7	0.00423	-2.9	-0.5	0	0	0
ENSMUSG00000035754	WDR18	WD repeat domain 18	nucleoplasm|cytoplasm|	multicellular organismal development|	protein binding|	5	1.5	8.88	5	1.4	3.24	1.5	11.7	0.00423	0.9	2.8	0	0	0
ENSMUSG00000074622	MAFB	v-maf avian musculoaponeurotic fibrosarcoma oncogene homolog B	nucleus|transcription factor complex|	transcription, DNA-templated|segment specification|sensory organ development|respiratory gaseous exchange|rhombomere 5 development|rhombomere 6 development|T cell differentiation in thymus|brain segmentation|inner ear morphogenesis|negative regulation of erythrocyte differentiation|positive regulation of transcription from RNA polymerase II promoter|thymus development|	sequence-specific DNA binding transcription factor activity|protein binding|transcription factor binding|sequence-specific DNA binding|	10	-1.2	6.85	10	-1.5	5.31	-1.2	11.7	0.00423	-2.5	-0.5	0	0	0
ENSMUSG00000039458	MTMR12	myotubularin related protein 12	cytoplasm|	dephosphorylation|	protein binding|phosphatase activity|	9	2.6	10.9	10	1.9	1.34	2.4	11.7	0.00423	1	4.4	0	0	0
ENSMUSG00000035048	ANAPC13	anaphase promoting complex subunit 13	anaphase-promoting complex|	mitotic nuclear division|protein K11-linked ubiquitination|	None	9	2.6	4.47	9	2.5	7.64	2.6	11.7	0.00423	0.8	4.3	0	0	0
ENSMUSG00000041346	WRAP53	WD repeat containing, antisense to TP53	nucleus|telomerase holoenzyme complex|cytoplasm|Cajal body|	telomere formation via telomerase|positive regulation of telomerase activity|	RNA binding|protein binding|	10	1.7	5.24	10	1.4	7.04	1.5	11.7	0.00423	0.7	2.7	0	0	0
ENSMUSG00000027761	AADAC	arylacetamide deacetylase	endoplasmic reticulum membrane|integral component of membrane|	metabolic process|positive regulation of triglyceride catabolic process|	catalytic activity|triglyceride lipase activity|lipase activity|serine hydrolase activity|deacetylase activity|	8	3	3.47	10	2.4	9.22	2.5	11.7	0.00423	1.3	4.7	0	0	0
ENSMUSG00000050912	TMEM123	transmembrane protein 123	external side of plasma membrane|integral component of membrane|	oncosis|	receptor activity|	10	1.9	5.57	10	1.8	6.38	1.9	11.6	0.00432	0.9	3.2	0	0	0
ENSMUSG00000055403	4933427D06RIK	RIKEN cDNA 4933427D06 gene	cellular_component|	biological_process|	molecular_function|	10	4.3	14.7	10	0	0	4.2	11.6	0.00432	1.8	8	0	0	0
ENSMUSG00000078974	SEC61G	Sec61 gamma subunit	endoplasmic reticulum membrane|membrane|integral component of membrane|	antigen processing and presentation of peptide antigen via MHC class I|antigen processing and presentation of exogenous peptide antigen via MHC class I, TAP-dependent|translation|SRP-dependent cotranslational protein targeting to membrane|gene expression|antigen processing and presentation of exogenous peptide antigen via MHC class I|cellular protein metabolic process|protein targeting to ER|prot…	protein transporter activity|P-P-bond-hydrolysis-driven protein transmembrane transporter activity|	10	1.9	11.5	10	1.1	0.881	1.6	11.6	0.00432	0.7	3.2	0	0	0
ENSMUSG00000022390	ZC3H7B	zinc finger CCCH-type containing 7B	nucleus|	viral process|	protein binding|poly(A) RNA binding|metal ion binding|	9	1	2.82	10	1.1	9.21	1.1	11.6	0.00432	0.5	2.8	0	0	0
ENSMUSG00000029062	CDK11B	cyclin-dependent kinase 11B	nucleus|cytoplasm|	regulation of cell growth|regulation of transcription, DNA-templated|protein phosphorylation|apoptotic process|mitotic nuclear division|cell proliferation|regulation of mRNA processing|regulation of cell cycle|	protein kinase activity|protein serine/threonine kinase activity|cyclin-dependent protein serine/threonine kinase activity|protein binding|ATP binding|poly(A) RNA binding|	8	1.8	10.5	7	1.2	2.18	1.6	11.6	0.00432	0.8	3.1	0	0	0
ENSMUSG00000020361	HSPA4	heat shock 70kDa protein 4	mitochondrion|cytosol|extracellular vesicular exosome|	response to unfolded protein|protein import into mitochondrial outer membrane|chaperone-mediated protein complex assembly|	ATP binding|	7	2.4	12.1	7	1.4	0.327	2.3	11.6	0.00432	1.2	4.3	0	0	0
ENSMUSG00000029992	GFPT1	glutamine--fructose-6-phosphate transaminase 1	cytosol|extracellular vesicular exosome|	fructose 6-phosphate metabolic process|glucosamine biosynthetic process|UDP-N-acetylglucosamine biosynthetic process|UDP-N-acetylglucosamine biosynthetic process|energy reserve metabolic process|dolichol-linked oligosaccharide biosynthetic process|glutamine metabolic process|activation of signaling protein activity involved in unfolded protein response|response to sucrose|carbohydrate biosyntheti…	glutamine-fructose-6-phosphate transaminase (isomerizing) activity|amino acid binding|carbohydrate binding|	9	2	2.85	9	1.9	9.15	1.9	11.6	0.00432	0.8	3.5	0	0	0
ENSMUSG00000012519	MLKL	mixed lineage kinase domain-like	cytoplasm|plasma membrane|	protein phosphorylation|protein homotrimerization|necroptotic process|	protein binding|ATP binding|protein complex binding|	10	2.8	7.36	10	2.9	4.61	2.8	11.6	0.00432	0.9	4.6	0	0	0
ENSMUSG00000096555	OLFR944	olfactory receptor 944	plasma membrane|membrane|integral component of membrane|	signal transduction|G-protein coupled receptor signaling pathway|sensory perception of smell|response to stimulus|detection of chemical stimulus involved in sensory perception of smell|	signal transducer activity|G-protein coupled receptor activity|olfactory receptor activity|	10	2.8	6.59	10	1.9	6.62	2.4	11.6	0.00432	1	4.3	0	0	0
ENSMUSG00000026664	PHYH	phytanoyl-CoA 2-hydroxylase	mitochondrion|peroxisome|peroxisomal matrix|	fatty acid alpha-oxidation|fatty acid alpha-oxidation|isoprenoid metabolic process|cellular lipid metabolic process|small molecule metabolic process|methyl-branched fatty acid metabolic process|	protein binding|electron carrier activity|L-ascorbic acid binding|metal ion binding|cofactor binding|phytanoyl-CoA dioxygenase activity|phytanoyl-CoA dioxygenase activity|	9	1.8	5.66	9	2	6.38	1.8	11.6	0.00432	0.7	3.2	0	0	0
ENSMUSG00000094006	IGKV4-59	immunoglobulin kappa variable 4-59	None	None	None	10	1.4	8.25	9	1.2	3.76	1.3	11.6	0.00432	0.6	2.3	0	0	0
ENSMUSG00000025724	SEC11A	SEC11 homolog A (S. cerevisiae)	endoplasmic reticulum membrane|integral component of membrane|extracellular vesicular exosome|	translation|signal peptide processing|proteolysis|SRP-dependent cotranslational protein targeting to membrane|gene expression|cellular protein metabolic process|regulation of insulin secretion|	serine-type peptidase activity|	10	1.4	6.01	9	2.4	6.29	2.7	11.6	0.00432	0.9	4.8	0	0	0
ENSMUSG00000074212	DNAJB14	DnaJ (Hsp40) homolog, subfamily B, member 14	membrane|integral component of membrane|	None	None	10	1.7	8.84	9	2.2	3.56	1.7	11.6	0.00432	0.7	3.2	0	0	0
ENSMUSG00000071478	HIST1H2AD	histone cluster 1, H2ad	nucleosome|nucleus|extracellular vesicular exosome|	nucleosome assembly|biological_process|	molecular_function|DNA binding|protein heterodimerization activity|	2	1	0.942	4	2.1	11.5	2	11.6	0.00432	1.3	3.9	0	0	0
ENSMUSG00000094505	IGHV8-6	immunoglobulin heavy variable V8-6	None	None	None	10	1.4	10.9	9	0.7	1.35	1.3	11.6	0.00432	0.6	3	0	0	0
ENSMUSG00000028750	PLA2G2C	phospholipase A2, group IIC	extracellular region|	phospholipid metabolic process|lipid catabolic process|	calcium ion binding|calcium-dependent phospholipase A2 activity|	9	1.8	8.2	10	2.6	4.47	1.8	11.6	0.00432	0.8	3.8	0	0	0
ENSMUSG00000021134	SRSF5	serine/arginine-rich splicing factor 5	nucleus|nucleoplasm|nucleolus|cytoplasm|nuclear speck|	mRNA splicing, via spliceosome|transcription from RNA polymerase II promoter|termination of RNA polymerase II transcription|mRNA splice site selection|mRNA processing|mRNA export from nucleus|RNA splicing|response to wounding|gene expression|mRNA 3'-end processing|regulation of cell cycle|	nucleotide binding|protein binding|poly(A) RNA binding|RS domain binding|	8	2	11.9	7	0.8	1.89	1.8	11.6	0.00432	0.8	4.1	0	0	0
ENSMUSG00000091472	GM3739	predicted gene 3739	None	None	None	9	1.8	12.8	7	0.4	0.824	1.6	11.6	0.00432	0.7	3.1	0	0	0
ENSMUSG00000035011	ZBTB7A	zinc finger and BTB domain containing 7A	nucleus|	negative regulation of transcription from RNA polymerase II promoter|transcription, DNA-templated|multicellular organismal development|cell differentiation|negative regulation of transcription, DNA-templated|	DNA binding|histone acetyltransferase binding|metal ion binding|	10	-1.2	3.28	10	-1.4	8.76	-1.4	11.6	0.00432	-2.6	-0.5	0	0	0
ENSMUSG00000021468	SPTLC1	serine palmitoyltransferase, long chain base subunit 1	endoplasmic reticulum membrane|integral component of membrane|serine C-palmitoyltransferase complex|SPOTS complex|	sphingolipid metabolic process|sphingomyelin biosynthetic process|sphingolipid biosynthetic process|small molecule metabolic process|sphinganine biosynthetic process|sphingosine biosynthetic process|ceramide biosynthetic process|	serine C-palmitoyltransferase activity|protein binding|pyridoxal phosphate binding|	10	-1	1.06	10	1.7	14.2	1.6	11.5	0.00444	0.8	4.1	0	0	0
ENSMUSG00000041698	SLCO1A1	solute carrier organic anion transporter family, member 1a1	plasma membrane|integral component of plasma membrane|integral component of plasma membrane|membrane|integral component of membrane|basolateral plasma membrane|	transport|ion transport|organic anion transport|ion transmembrane transport|	transporter activity|organic anion transmembrane transporter activity|	10	1.7	6.79	10	1.9	5.15	1.7	11.5	0.00444	0.7	3.1	0	0	0
ENSMUSG00000026725	TNN	tenascin N	cellular_component|proteinaceous extracellular matrix|cell surface|	cell-matrix adhesion|axonogenesis|cell growth|cell migration|	molecular_function|integrin binding|identical protein binding|	9	1.5	8.4	10	1.5	3.42	1.5	11.5	0.00444	0.7	2.7	0	0	0
ENSMUSG00000041638	GCN1L1	GCN1 general control of amino-acid synthesis 1-like 1 (yeast)	cytoplasm|cytoplasm|ribosome|membrane|	translation|regulation of translation|	translation factor activity, nucleic acid binding|poly(A) RNA binding|	6	0.6	0.952	7	2.5	13	2.4	11.5	0.00444	0.9	5	0	0	0
ENSMUSG00000009292	TRPM2	transient receptor potential cation channel, subfamily M, member 2	plasma membrane|integral component of plasma membrane|	calcium ion transport|metabolic process|response to hydroperoxide|ion transmembrane transport|sodium ion transmembrane transport|transmembrane transport|calcium ion transmembrane transport|manganese ion transmembrane transport|	calcium channel activity|sodium channel activity|manganese ion transmembrane transporter activity|ADP-ribose diphosphatase activity|	10	3.1	2	10	1.7	10.9	1.7	11.5	0.00444	0.8	3.9	0	0	0
ENSMUSG00000031913	VPS4A	vacuolar protein sorting 4 homolog A (S. cerevisiae)	ESCRT III complex|cytoplasm|cytosol|midbody|late endosome membrane|perinuclear region of cytoplasm|extracellular vesicular exosome|	cytokinesis|ATP catabolic process|abscission|protein transport|viral process|vesicle-mediated transport|endosomal transport|endosomal transport|viral life cycle|cytokinesis checkpoint|negative regulation of cytokinesis|membrane organization|	protein binding|ATP binding|protein C-terminus binding|protein domain specific binding|ATPase activity, coupled|	9	2.4	11.2	8	2.5	0.554	2.4	11.5	0.00444	1.3	4.4	0	0	0
ENSMUSG00000022313	UTP23	UTP23, small subunit (SSU) processome component, homolog (yeast)	nucleolus|small-subunit processome|	rRNA processing|	poly(A) RNA binding|	6	1	2.47	8	2	10.5	1.4	11.5	0.00444	0.7	3.4	0	0	0
ENSMUSG00000049606	ZFP644	zinc finger protein 644	cellular_component|	biological_process|	molecular_function|	10	0	0	10	-1.9	14.4	-1.9	11.5	0.00444	-4.5	-0.7	0	0	0
ENSMUSG00000021102	GLRX5	glutaredoxin 5	nucleus|mitochondrion|mitochondrion|	hemopoiesis|cell redox homeostasis|oxidation-reduction process|	electron carrier activity|protein disulfide oxidoreductase activity|metal ion binding|2 iron, 2 sulfur cluster binding|	10	0.7	0.927	8	1.8	11.9	1.7	11.5	0.00444	0.8	3.1	0	0	0
ENSMUSG00000022945	CHAF1B	chromatin assembly factor 1, subunit B (p60)	nuclear chromatin|nucleus|nucleus|nucleoplasm|cytoplasm|cytosol|CAF-1 complex|protein complex|	DNA replication|DNA repair|DNA replication-dependent nucleosome assembly|transcription, DNA-templated|regulation of transcription, DNA-templated|protein complex assembly|cell cycle|chromatin assembly|	chromatin binding|histone binding|unfolded protein binding|	8	2.5	11.8	5	1.3	0.722	2.4	11.5	0.00444	1.3	4.5	0	0	0
ENSMUSG00000028645	SLC2A1	solute carrier family 2 (facilitated glucose transporter), member 1	female pronucleus|plasma membrane|integral component of plasma membrane|caveola|cell-cell junction|membrane|basolateral plasma membrane|midbody|cortical actin cytoskeleton|melanosome|extracellular vesicular exosome|blood microparticle|	carbohydrate metabolic process|energy reserve metabolic process|protein complex assembly|vitamin metabolic process|water-soluble vitamin metabolic process|response to osmotic stress|hexose transport|glucose transport|glucose transport|L-ascorbic acid metabolic process|cellular response to glucose starvation|xenobiotic transport|small molecule metabolic process|regulation of insulin secretion|tran…	glucose transmembrane transporter activity|protein binding|kinase binding|dehydroascorbic acid transporter activity|identical protein binding|xenobiotic transporter activity|protein self-association|D-glucose transmembrane transporter activity|	10	0.8	3.21	10	1.1	8.88	1	11.5	0.00444	0.5	2	0	0	0
ENSMUSG00000041417	PIK3R1	phosphoinositide-3-kinase, regulatory subunit 1 (alpha)	cytosol|plasma membrane|phosphatidylinositol 3-kinase complex|1-phosphatidylinositol-4-phosphate 3-kinase, class IA complex|membrane|	negative regulation of cell-matrix adhesion|protein phosphorylation|phospholipid metabolic process|phosphatidylinositol biosynthetic process|epidermal growth factor receptor signaling pathway|blood coagulation|insulin receptor signaling pathway|fibroblast growth factor receptor signaling pathway|extrinsic apoptotic signaling pathway via death domain receptors|intrinsic apoptotic signaling pathway…	transmembrane receptor protein tyrosine kinase adaptor activity|insulin receptor binding|insulin-like growth factor receptor binding|neurotrophin TRKA receptor binding|protein binding|protein phosphatase binding|phosphatidylinositol 3-kinase regulator activity|ErbB-3 class receptor binding|phosphatidylinositol 3-kinase binding|insulin binding|insulin receptor substrate binding|	10	-1.5	4.18	10	-1.2	7.89	-1.3	11.5	0.00444	-2.3	-0.5	0	0	0
ENSMUSG00000028049	SCAMP3	secretory carrier membrane protein 3	Golgi membrane|integral component of membrane|extracellular vesicular exosome|	post-Golgi vesicle-mediated transport|protein transport|response to retinoic acid|	None	9	2.3	1.93	10	2.6	10.1	2.5	11.5	0.00444	0.9	4.6	0	0	0
ENSMUSG00000031148	GPKOW	G patch domain and KOW motifs	nucleus|	biological_process|	molecular_function|nucleic acid binding|protein binding|	9	1.4	4.74	9	1.4	7.15	1.4	11.5	0.00444	0.7	2.6	0	0	0
ENSMUSG00000001785	PWP1	PWP1 homolog (S. cerevisiae)	nucleus|nucleolus|Golgi apparatus|	transcription, DNA-templated|	None	10	1.1	2.59	10	1.5	9.82	1.4	11.5	0.00444	0.7	3.3	0	0	0
ENSMUSG00000046093	HPCAL4	hippocalcin like 4	intracellular|	central nervous system development|	calcium channel regulator activity|calcium ion binding|protein C-terminus binding|protein domain specific binding|	10	1.6	8.86	9	0.8	3.51	1.4	11.5	0.00444	0.6	2.6	0	0	0
ENSMUSG00000022637	CBLB	Cbl proto-oncogene B, E3 ubiquitin protein ligase	nucleus|cytoplasm|cytosol|plasma membrane|	positive regulation of T cell anergy|NLS-bearing protein import into nucleus|immune response|signal transduction|cell surface receptor signaling pathway|protein ubiquitination|intracellular signal transduction|T cell activation|positive regulation of protein catabolic process|negative regulation of alpha-beta T cell proliferation|negative regulation of T cell receptor signaling pathway|	phosphotyrosine binding|ubiquitin-protein transferase activity|signal transducer activity|calcium ion binding|protein binding|zinc ion binding|ligase activity|	9	0.6	0.774	9	1.8	11.8	1.7	11.4	0.00457	0.7	3.1	0	0	0
ENSMUSG00000032834	PWP2	PWP2 periodic tryptophan protein homolog (yeast)	nucleolus|cytoplasm|	signal transduction|	signal transducer activity|poly(A) RNA binding|	7	2.1	8.67	8	1.2	4.23	1.4	11.4	0.00457	0.6	3.2	0	0	0
ENSMUSG00000024991	EIF3A	eukaryotic translation initiation factor 3, subunit A	nucleus|nucleolus|cytoplasm|cytoplasm|cytosol|eukaryotic translation initiation factor 3 complex|membrane|eukaryotic 43S preinitiation complex|eukaryotic 48S preinitiation complex|	formation of translation preinitiation complex|formation of translation initiation complex|translation|translational initiation|translational initiation|regulation of translational initiation|gene expression|cellular protein metabolic process|	translation initiation factor activity|translation initiation factor activity|structural molecule activity|protein binding|poly(A) RNA binding|	6	1.8	9.59	5	1.2	2.44	1.7	11.4	0.00457	0.9	3.4	0	0	0
ENSMUSG00000017299	DNTTIP1	deoxynucleotidyltransferase, terminal, interacting protein 1	nucleus|nucleolus|	None	None	10	-1.3	10.4	10	-0.6	2.08	-1.2	11.4	0.00457	-2.4	-0.4	0	0	0
ENSMUSG00000040269	MRPS28	mitochondrial ribosomal protein S28	mitochondrion|mitochondrial small ribosomal subunit|	biological_process|	poly(A) RNA binding|	9	1.6	10.6	7	1.2	1.21	1.5	11.4	0.00457	0.7	3.3	0	0	0
ENSMUSG00000048502	DUXBL1	double homeobox B-like 1	nucleus|	regulation of T cell differentiation|	molecular_function|	10	3.1	14.1	10	-0.6	1.12	3.1	11.4	0.00457	0.9	5.2	0	0	0
ENSMUSG00000052738	SUCLG1	succinate-CoA ligase, alpha subunit	mitochondrion|mitochondrial inner membrane|mitochondrial matrix|succinate-CoA ligase complex (GDP-forming)|extracellular vesicular exosome|	tricarboxylic acid cycle|tricarboxylic acid cycle|succinyl-CoA metabolic process|succinate metabolic process|cellular metabolic process|small molecule metabolic process|	ATP citrate synthase activity|succinate-CoA ligase (ADP-forming) activity|succinate-CoA ligase (GDP-forming) activity|GTP binding|GDP binding|poly(A) RNA binding|protein heterodimerization activity|cofactor binding|	10	1.7	5.19	10	1.2	7.13	1.4	11.4	0.00457	0.5	2.4	0	0	0
ENSMUSG00000021978	EXTL3	exostosin-like glycosyltransferase 3	endoplasmic reticulum|endoplasmic reticulum membrane|integral component of membrane|intrinsic component of endoplasmic reticulum membrane|	activation of signaling protein activity involved in unfolded protein response|heparan sulfate proteoglycan biosynthetic process|positive regulation of cell growth|endoplasmic reticulum unfolded protein response|cellular protein metabolic process|	glucuronyl-galactosyl-proteoglycan 4-alpha-N-acetylglucosaminyltransferase activity|metal ion binding|	10	2	11.6	10	-0.3	0.222	2.1	11.4	0.00457	1	3.9	0	0	0
ENSMUSG00000074922	FAM122A	family with sequence similarity 122A	None	None	None	8	0.6	0.156	10	1.6	11.8	1.5	11.4	0.00457	0.8	2.9	0	0	0
ENSMUSG00000045631	TMPRSS12	transmembrane (C-terminal) protease, serine 12	integral component of membrane|	proteolysis|	serine-type endopeptidase activity|	9	1.9	7.87	10	-1.3	4.21	2.1	11.4	0.00457	0.8	3.8	0	0	0
ENSMUSG00000024858	ADRBK1	adrenergic, beta, receptor kinase 1	cytoplasm|cytosol|plasma membrane|membrane|membrane|	desensitization of G-protein coupled receptor protein signaling pathway|negative regulation of the force of heart contraction by chemical signal|signal transduction|epidermal growth factor receptor signaling pathway|activation of phospholipase C activity|G-protein coupled acetylcholine receptor signaling pathway|tachykinin receptor signaling pathway|heart development|fibroblast growth factor rece…	protein kinase activity|G-protein coupled receptor kinase activity|protein binding|ATP binding|alpha-2A adrenergic receptor binding|Edg-2 lysophosphatidic acid receptor binding|beta-adrenergic receptor kinase activity|	10	-1.3	10.3	10	-0.6	1.91	-1.1	11.4	0.00457	-2.1	-0.5	0	0	0
ENSMUSG00000020171	YEATS4	YEATS domain containing 4	nucleoplasm|nucleoplasm|nuclear matrix|NuA4 histone acetyltransferase complex|	chromatin organization|transcription, DNA-templated|mitotic nuclear division|regulation of growth|histone H4 acetylation|histone H2A acetylation|positive regulation of transcription, DNA-templated|	DNA binding|sequence-specific DNA binding transcription factor activity|structural constituent of cytoskeleton|protein binding|protein C-terminus binding|	10	1.6	5.98	9	2.1	6.08	1.8	11.4	0.00457	0.8	3.1	0	0	0
ENSMUSG00000003660	SNRNP200	small nuclear ribonucleoprotein 200kDa (U5)	nucleus|nucleoplasm|spliceosomal complex|U5 snRNP|membrane|catalytic step 2 spliceosome|	cis assembly of pre-catalytic spliceosome|mRNA splicing, via spliceosome|mRNA splicing, via spliceosome|mRNA splicing, via spliceosome|osteoblast differentiation|ATP catabolic process|RNA splicing|gene expression|	ATP-dependent RNA helicase activity|protein binding|ATP binding|ATP-dependent helicase activity|identical protein binding|poly(A) RNA binding|	5	1.2	7.56	3	1.3	4.25	1.2	11.4	0.00457	0.8	2	0	0	0
ENSMUSG00000095619	VMN1R157	vomeronasal 1 receptor 157	cellular_component|	biological_process|	molecular_function|	8	1	2.58	9	1.4	9.24	1.4	11.3	0.0047	0.6	2.7	0	0	0
ENSMUSG00000036052	DNAJB5	DnaJ (Hsp40) homolog, subfamily B, member 5	nucleus|cytosol|	negative regulation of transcription from RNA polymerase II promoter|protein folding|response to unfolded protein|	protein binding|unfolded protein binding|chaperone binding|	9	2.3	3.7	9	1.7	8.14	1.8	11.3	0.0047	0.9	3.5	0	0	0
ENSMUSG00000002718	CSE1L	CSE1 chromosome segregation 1-like (yeast)	nucleus|cytoplasm|membrane|extracellular vesicular exosome|	protein export from nucleus|apoptotic process|cell proliferation|	protein binding|importin-alpha export receptor activity|Ran GTPase binding|	5	1.7	3.48	5	-2.4	11.2	-2.3	11.3	0.0047	-5	1.2	0	0	0
ENSMUSG00000024034	TMPRSS3	transmembrane protease, serine 3	endoplasmic reticulum|endoplasmic reticulum membrane|integral component of membrane|neuronal cell body|	proteolysis|cellular sodium ion homeostasis|receptor-mediated endocytosis|sensory perception of sound|	serine-type endopeptidase activity|scavenger receptor activity|sodium channel regulator activity|	9	2.9	4.04	9	2.4	7.77	2.8	11.3	0.0047	1	4.5	0	0	0
ENSMUSG00000031431	TSC22D3	TSC22 domain family, member 3	nucleus|cytosol|	negative regulation of transcription from RNA polymerase II promoter|regulation of transcription, DNA-templated|response to osmotic stress|body fluid secretion|ion transmembrane transport|negative regulation of skeletal muscle tissue development|transmembrane transport|negative regulation of activation-induced cell death of T cells|	sequence-specific DNA binding transcription factor activity|MRF binding|	10	1.7	7	10	1.3	5.15	1.7	11.3	0.0047	0.7	3.6	0	0	0
ENSMUSG00000037376	TRMT6	tRNA methyltransferase 6 homolog (S. cerevisiae)	nucleus|	translational initiation|regulation of translational initiation|tRNA processing|	translation initiation factor activity|poly(A) RNA binding|	5	1	1.12	8	1.5	11	1.5	11.3	0.0047	0.7	3	0	0	0
ENSMUSG00000029191	RFC1	replication factor C (activator 1) 1, 145kDa	nucleus|nucleoplasm|DNA replication factor C complex|Golgi apparatus|cell junction|extracellular vesicular exosome|	negative regulation of transcription from RNA polymerase II promoter|mitotic cell cycle|telomere maintenance via recombination|telomere maintenance|ATP catabolic process|DNA-dependent DNA replication|DNA strand elongation involved in DNA replication|DNA repair|transcription-coupled nucleotide-excision repair|nucleotide-excision repair|nucleotide-excision repair, DNA gap filling|transcription, DNA…	DNA binding|DNA clamp loader activity|double-stranded DNA binding|protein binding|ATP binding|enzyme activator activity|protein domain specific binding|sequence-specific DNA binding|	8	1.7	6.42	5	3	6.83	2.2	11.3	0.0047	0.9	4.6	0	0	0
ENSMUSG00000029713	GNB2	guanine nucleotide binding protein (G protein), beta polypeptide 2	extracellular space|lysosomal membrane|plasma membrane|membrane|protein complex|cell body|perinuclear region of cytoplasm|extracellular vesicular exosome|	energy reserve metabolic process|GTP catabolic process|G-protein coupled receptor signaling pathway|synaptic transmission|small molecule metabolic process|cellular response to glucagon stimulus|	GTPase activity|signal transducer activity|calcium channel regulator activity|protein binding|protein complex binding|GTPase binding|	10	-1.3	11.2	9	-0.6	1.27	-1.2	11.3	0.0047	-2.5	-0.5	0	0	0
ENSMUSG00000089960	UGT1A1	UDP glucuronosyltransferase 1 family, polypeptide A1	endoplasmic reticulum|endoplasmic reticulum membrane|integral component of plasma membrane|cytochrome complex|	liver development|porphyrin-containing compound metabolic process|bilirubin conjugation|xenobiotic metabolic process|acute-phase response|response to nutrient|digestion|steroid metabolic process|estrogen metabolic process|drug metabolic process|organ regeneration|response to lipopolysaccharide|heme catabolic process|response to drug|retinoic acid metabolic process|response to starvation|negative …	retinoic acid binding|enzyme inhibitor activity|steroid binding|glucuronosyltransferase activity|glucuronosyltransferase activity|enzyme binding|protein homodimerization activity|protein homodimerization activity|protein heterodimerization activity|protein heterodimerization activity|	10	1.6	3.89	8	1.3	7.85	1.4	11.3	0.0047	0.6	2.5	0	0	0
ENSMUSG00000024907	GAL	galanin/GMAP prepropeptide	extracellular region|extracellular space|Golgi apparatus|secretory granule|neuronal cell body|	inflammatory response|neuropeptide signaling pathway|nervous system development|feeding behavior|protein kinase A signaling|cAMP-mediated signaling|insulin secretion|regulation of glucocorticoid metabolic process|response to insulin|response to drug|positive regulation of apoptotic process|response to estrogen|positive regulation of transcription from RNA polymerase II promoter|negative regulatio…	neuropeptide hormone activity|neuropeptide hormone activity|protein binding|type 1 galanin receptor binding|type 2 galanin receptor binding|type 3 galanin receptor binding|	10	1.3	5.72	10	1.3	5.92	1.3	11.3	0.0047	0.6	2.2	0	0	0
ENSMUSG00000027620	RBM39	RNA binding motif protein 39	nucleus|nucleoplasm|microtubule organizing center|microtubule cytoskeleton|nuclear speck|	transcription, DNA-templated|regulation of transcription, DNA-templated|RNA processing|mRNA processing|RNA splicing|	nucleotide binding|protein binding|poly(A) RNA binding|	8	2.2	7.86	7	1.7	4.05	2.2	11.3	0.0047	1	4	0	0	0
ENSMUSG00000038900	RPL12	ribosomal protein L12	cytosol|membrane|cytosolic large ribosomal subunit|extracellular vesicular exosome|	nuclear-transcribed mRNA catabolic process, nonsense-mediated decay|translation|translation|translational initiation|translational elongation|translational termination|SRP-dependent cotranslational protein targeting to membrane|gene expression|viral process|RNA metabolic process|mRNA metabolic process|viral life cycle|viral transcription|cellular protein metabolic process|	structural constituent of ribosome|protein binding|poly(A) RNA binding|	5	2.7	6.2	3	2.3	5.77	2.5	11.3	0.0047	1.1	4.6	0	0	0
ENSMUSG00000020521	RNFT1	ring finger protein, transmembrane 1	integral component of membrane|	None	zinc ion binding|	10	1.9	4.87	9	2.6	6.83	2.6	11.3	0.0047	0.9	4.4	0	0	0
ENSMUSG00000041426	HIBCH	3-hydroxyisobutyryl-CoA hydrolase	mitochondrial matrix|extracellular vesicular exosome|	valine catabolic process|branched-chain amino acid catabolic process|cellular nitrogen compound metabolic process|small molecule metabolic process|	3-hydroxyisobutyryl-CoA hydrolase activity|	8	3.2	6.44	9	1.9	6.13	1.9	11.3	0.0047	0.9	4.7	0	0	0
ENSMUSG00000045427	HNRNPH2	heterogeneous nuclear ribonucleoprotein H2 (H')	nucleus|nucleoplasm|membrane|ribonucleoprotein complex|	mRNA splicing, via spliceosome|RNA splicing|gene expression|	nucleotide binding|RNA binding|poly(A) RNA binding|	10	2	4.47	10	2.7	7.95	2.1	11.3	0.0047	0.9	4.3	0	0	0
ENSMUSG00000047861	FOXI1	forkhead box I1	nucleus|	transcription, DNA-templated|embryo development|inner ear morphogenesis|positive regulation of transcription from RNA polymerase II promoter|	sequence-specific DNA binding transcription factor activity|DNA binding, bending|sequence-specific DNA binding|transcription regulatory region DNA binding|	10	2.7	4.42	10	3.1	7.38	3	11.2	0.00483	0.8	5.2	0	0	0
ENSMUSG00000034881	TBXA2R	thromboxane A2 receptor	acrosomal vesicle|plasma membrane|integral component of plasma membrane|	inflammatory response|G-protein coupled receptor signaling pathway|positive regulation of cytosolic calcium ion concentration|response to nutrient|blood coagulation|second-messenger-mediated signaling|platelet activation|response to lipopolysaccharide|thromboxane A2 signaling pathway|response to drug|positive regulation of GTPase activity|positive regulation of angiogenesis|positive regulation of…	thromboxane A2 receptor activity|guanyl-nucleotide exchange factor activity|protein binding|	10	0.9	1.9	10	2.2	11.1	2	11.2	0.00483	0.8	3.7	0	0	0
ENSMUSG00000021451	SEMA4D	sema domain, immunoglobulin domain (Ig), transmembrane domain (TM) and short cytoplasmic domain, (semaphorin) 4D	extracellular space|plasma membrane|integral component of plasma membrane|	negative regulation of transcription from RNA polymerase II promoter|positive regulation of protein phosphorylation|immune response|cell adhesion|negative regulation of cell adhesion|axon guidance|regulation of cell shape|negative regulation of alkaline phosphatase activity|positive regulation of phosphatidylinositol 3-kinase signaling|positive regulation of cell migration|positive regulation of …	receptor activity|transmembrane signaling receptor activity|receptor binding|protein binding|semaphorin receptor binding|semaphorin receptor binding|	10	1.8	3.73	8	2	7.87	1.9	11.2	0.00483	1.1	3.4	0	0	0
ENSMUSG00000001998	AP4E1	adaptor-related protein complex 4, epsilon 1 subunit	Golgi apparatus|coated pit|membrane coat|	intracellular protein transport|vesicle-mediated transport|	None	7	3.5	10.7	10	2.7	1.52	2.7	11.2	0.00483	0.8	5.7	0	0	0
ENSMUSG00000033009	OGFOD1	2-oxoglutarate and iron-dependent oxygenase domain containing 1	nucleus|cytoplasm|cytoplasmic stress granule|	regulation of translational termination|cell proliferation|protein hydroxylation|peptidyl-proline hydroxylation|stress granule assembly|oxidation-reduction process|	iron ion binding|L-ascorbic acid binding|peptidyl-proline dioxygenase activity|peptidyl-proline 3-dioxygenase activity|	8	-1.8	4.78	9	2.4	8.72	1.5	11.2	0.00483	0.6	4	0	0	0
ENSMUSG00000057614	GNAI1	guanine nucleotide binding protein (G protein), alpha inhibiting activity polypeptide 1	nucleus|cytoplasm|lysosomal membrane|centrosome|heterotrimeric G-protein complex|plasma membrane|plasma membrane|midbody|extracellular vesicular exosome|	GTP catabolic process|cell cycle|G-protein coupled receptor signaling pathway|adenylate cyclase-modulating G-protein coupled receptor signaling pathway|adenylate cyclase-inhibiting G-protein coupled receptor signaling pathway|synaptic transmission|blood coagulation|platelet activation|response to peptide hormone|cell division|	GTPase activity|GTPase activity|GTPase activity|signal transducer activity|protein binding|GTP binding|G-protein beta/gamma-subunit complex binding|G-protein coupled serotonin receptor binding|metal ion binding|	10	0.9	3.69	10	2.1	8.55	2.1	11.2	0.00483	0.7	3.5	0	0	0
ENSMUSG00000021326	TRIM27	tripartite motif containing 27	nucleus|nucleoplasm|cytoplasm|endosome|early endosome|integral component of plasma membrane|membrane|PML body|retromer complex|nuclear membrane|	negative regulation of transcription from RNA polymerase II promoter|negative regulation of adaptive immune response|transcription, DNA-templated|negative regulation of protein kinase activity|spermatogenesis|cell proliferation|peptidyl-tyrosine phosphorylation|negative regulation of tumor necrosis factor production|negative regulation of viral transcription|Arp2/3 complex-mediated actin nucleati…	nucleic acid binding|DNA binding|transmembrane receptor protein tyrosine kinase activity|ubiquitin-protein transferase activity|ubiquitin-protein transferase activity|protein binding|zinc ion binding|ligase activity|metal ion binding|	9	2.6	4.15	9	1.2	8.05	1.4	11.2	0.00483	0.7	3.2	0	0	0
ENSMUSG00000096846	GM8890	predicted gene 8890	None	None	None	9	2.2	11.2	8	1.7	0.362	2.1	11.2	0.00483	1.1	4	0	0	0
ENSMUSG00000035472	SLC25A21	solute carrier family 25 (mitochondrial oxoadipate carrier), member 21	mitochondrial inner membrane|integral component of membrane|	lysine catabolic process|cellular nitrogen compound metabolic process|small molecule metabolic process|transmembrane transport|	None	7	1.9	9.31	10	1	2.51	1.8	11.2	0.00483	0.7	3.3	0	0	0
ENSMUSG00000045210	VCPIP1	valosin containing protein (p97)/p47 complex interacting protein 1	cytoplasm|endoplasmic reticulum|Golgi stack|	proteolysis|mitotic nuclear division|endoplasmic reticulum membrane fusion|protein ubiquitination|protein K11-linked deubiquitination|protein K48-linked deubiquitination|Golgi reassembly|	ubiquitin-specific protease activity|ubiquitin-specific protease activity|	10	2.9	7.01	9	1.4	5.61	1.7	11.2	0.00483	0.8	3.9	0	0	0
ENSMUSG00000095427	RPS2-PS6	ribosomal protein S2, pseudogene 6	None	None	None	7	1.2	3.79	8	1.8	8.08	1.6	11.2	0.00483	0.7	3	0	0	0
ENSMUSG00000027881	PRPF38B	pre-mRNA processing factor 38B	spliceosomal complex|	mRNA processing|RNA splicing|	poly(A) RNA binding|	6	2.1	9.8	6	-2.8	8.96	2	11.2	0.00483	-3.3	4	0	0	0
ENSMUSG00000039621	PREX1	phosphatidylinositol-3,4,5-trisphosphate-dependent Rac exchange factor 1	cytoplasm|cytosol|plasma membrane|growth cone|dendritic shaft|intracellular membrane-bounded organelle|perinuclear region of cytoplasm|	superoxide metabolic process|actin filament polymerization|regulation of actin filament polymerization|positive regulation of Rho GTPase activity|positive regulation of Rho GTPase activity|intracellular signal transduction|neutrophil activation|regulation of dendrite development|	Rho guanyl-nucleotide exchange factor activity|Rho GTPase activator activity|protein binding|phospholipid binding|enzyme binding|	9	-1.9	10.1	10	-0.9	2.35	-1.7	11.2	0.00483	-3	-0.5	0	0	0
ENSMUSG00000045078	RNF216	ring finger protein 216	nucleus|cytoplasm|	apoptotic process|viral process|regulation of interferon-beta production|proteasome-mediated ubiquitin-dependent protein catabolic process|regulation of defense response to virus by host|protein K48-linked ubiquitination|	protein binding|zinc ion binding|ligase activity|	7	0.7	0.707	9	2.3	12.8	2.3	11.2	0.00483	1	4.3	0	0	0
ENSMUSG00000031371	HAUS7	HAUS augmin-like complex, subunit 7	nucleolus|cytoplasm|centrosome|spindle|microtubule|plasma membrane|HAUS complex|	mitotic nuclear division|spindle assembly|centrosome organization|	thioesterase binding|thioesterase binding|	6	2	12.2	2	0.2	0.117	1.9	11.2	0.00483	1	3.7	0	0	0
ENSMUSG00000063952	BRPF3	bromodomain and PHD finger containing, 3	extracellular region|cytosol|MOZ/MORF histone acetyltransferase complex|	platelet degranulation|blood coagulation|platelet activation|histone H3 acetylation|	protein binding|zinc ion binding|	9	2.2	8.5	10	1.1	4.88	1.2	11.2	0.00483	0.7	3.3	0	0	0
ENSMUSG00000031781	CIAPIN1	cytokine induced apoptosis inhibitor 1	nucleus|nucleolus|cytoplasm|cytoplasm|mitochondrial intermembrane space|	apoptotic process|iron-sulfur cluster assembly|hemopoiesis|negative regulation of apoptotic process|small molecule metabolic process|	protein binding|electron carrier activity|metal ion binding|2 iron, 2 sulfur cluster binding|	10	1.4	5.92	9	2.3	7.36	1.7	11.1	0.00496	0.7	3.5	0	0	0
ENSMUSG00000033253	SZT2	seizure threshold 2 homolog (mouse)	peroxisome|extracellular vesicular exosome|	central nervous system development|embryo development|post-embryonic development|corpus callosum morphogenesis|pigmentation|regulation of superoxide dismutase activity|	molecular_function|	10	1.9	11.1	10	0.4	0.47	1.9	11.1	0.00496	0.8	3.3	0	0	0
ENSMUSG00000023175	BSG	basigin (Ok blood group)	Golgi membrane|acrosomal membrane|mitochondrion|plasma membrane|integral component of plasma membrane|membrane|sarcolemma|melanosome|membrane raft|extracellular vesicular exosome|	pyruvate metabolic process|cell surface receptor signaling pathway|embryo implantation|blood coagulation|extracellular matrix disassembly|extracellular matrix organization|odontogenesis of dentin-containing tooth|response to peptide hormone|cellular metabolic process|small molecule metabolic process|response to mercury ion|decidualization|leukocyte migration|response to cAMP|protein targeting to …	protein binding|mannose binding|	9	1.9	7.09	10	1.1	6.19	1.3	11.1	0.00496	0.6	2.7	0	0	0
ENSMUSG00000000628	HK2	hexokinase 2	mitochondrial outer membrane|cytosol|membrane|	cellular glucose homeostasis|carbohydrate metabolic process|glucose metabolic process|glycolytic process|lactation|apoptotic mitochondrial changes|hexose transport|glucose transport|small molecule metabolic process|regulation of glucose import|carbohydrate phosphorylation|glucose 6-phosphate metabolic process|transmembrane transport|	glucokinase activity|hexokinase activity|ATP binding|glucose binding|fructokinase activity|mannokinase activity|	9	2.7	3.77	10	1.9	8.02	1.9	11.1	0.00496	0.8	3.9	0	0	0
ENSMUSG00000007029	VARS	valyl-tRNA synthetase	mitochondrion|cytosol|	tRNA aminoacylation for protein translation|valyl-tRNA aminoacylation|regulation of translational fidelity|gene expression|	aminoacyl-tRNA editing activity|valine-tRNA ligase activity|ATP binding|	7	1.4	5.2	8	1.4	6.24	1.4	11.1	0.00496	0.6	2.5	0	0	0
ENSMUSG00000034460	SIX4	SIX homeobox 4	nucleus|	skeletal muscle tissue development|regulation of synaptic growth at neuromuscular junction|anatomical structure morphogenesis|regulation of protein localization|inner ear morphogenesis|negative regulation of neuron apoptotic process|positive regulation of transcription from RNA polymerase II promoter|thymus development|generation of neurons|embryonic cranial skeleton morphogenesis|myoblast migrat…	sequence-specific DNA binding transcription factor activity|sequence-specific DNA binding|	10	1.4	5.89	10	0.9	6	1.3	11.1	0.00496	0.6	2.2	0	0	0
ENSMUSG00000032126	HMBS	hydroxymethylbilane synthase	cytosol|	porphyrin-containing compound metabolic process|protoporphyrinogen IX biosynthetic process|heme biosynthetic process|heme biosynthetic process|peptidyl-pyrromethane cofactor linkage|small molecule metabolic process|	hydroxymethylbilane synthase activity|hydroxymethylbilane synthase activity|	9	2.1	7.46	9	2	4.1	2.1	11.1	0.00496	0.9	3.5	0	0	0
ENSMUSG00000014601	STRIP1	striatin interacting protein 1	nucleus|cytoplasm|extracellular vesicular exosome|	regulation of cell morphogenesis|cortical actin cytoskeleton organization|	molecular_function|protein binding|	10	-1.6	7.69	10	-1	4.6	-1.2	11.1	0.00496	-2.4	-0.5	0	0	0
ENSMUSG00000048402	GLI2	GLI family zinc finger 2	nucleus|cytoplasm|membrane|nuclear speck|motile primary cilium|	negative regulation of transcription from RNA polymerase II promoter|skeletal system development|osteoblast differentiation|in utero embryonic development|kidney development|chondrocyte differentiation|osteoblast development|transcription, DNA-templated|regulation of transcription, DNA-templated|smoothened signaling pathway|pattern specification process|axon guidance|ventral midline development|h…	chromatin binding|sequence-specific DNA binding transcription factor activity|protein binding|zinc ion binding|sequence-specific DNA binding|transcription regulatory region DNA binding|	8	2.4	1.83	9	2.1	9.79	2.1	11.1	0.00496	0.9	3.9	0	0	0
ENSMUSG00000004937	SGTA	small glutamine-rich tetratricopeptide repeat (TPR)-containing, alpha	cytoplasm|	biological_process|viral process|	protein binding|	9	0.6	1.73	9	2	12.5	1.9	11.1	0.00496	0.7	3.7	0	0	0
ENSMUSG00000028837	PSMB2	proteasome (prosome, macropain) subunit, beta type, 2	proteasome complex|nucleus|nucleoplasm|cytosol|proteasome core complex|membrane|extracellular vesicular exosome|	G1/S transition of mitotic cell cycle|protein polyubiquitination|mitotic cell cycle|antigen processing and presentation of peptide antigen via MHC class I|antigen processing and presentation of exogenous peptide antigen via MHC class I, TAP-dependent|regulation of cellular amino acid metabolic process|apoptotic process|DNA damage response, signal transduction by p53 class mediator resulting in ce…	threonine-type endopeptidase activity|protein binding|	4	1.5	4.2	5	1.5	7.29	1.5	11.1	0.00496	0.8	2.8	0	0	0
ENSMUSG00000002102	PSMC3	proteasome (prosome, macropain) 26S subunit, ATPase, 3	proteasome complex|cytoplasmic mRNA processing body|nucleus|nucleoplasm|cytosol|membrane|proteasome accessory complex|perinuclear region of cytoplasm|	G1/S transition of mitotic cell cycle|protein polyubiquitination|mitotic cell cycle|blastocyst development|antigen processing and presentation of peptide antigen via MHC class I|antigen processing and presentation of exogenous peptide antigen via MHC class I, TAP-dependent|ATP catabolic process|regulation of cellular amino acid metabolic process|apoptotic process|DNA damage response, signal trans…	transcription coactivator activity|transcription corepressor activity|protein binding|ATP binding|ATPase activity|	6	2.7	8.36	7	1.2	4.81	2	11	0.00511	0.8	4.5	0	0	0
ENSMUSG00000027708	DCUN1D1	DCN1, defective in cullin neddylation 1, domain containing 1	ubiquitin ligase complex|	biological_process|	protein binding|	9	1.8	7.96	10	2.6	3.98	1.8	11	0.00511	0.6	3.8	0	0	0
ENSMUSG00000029146	SNX17	sorting nexin 17	cytoplasm|endosome|early endosome|Golgi apparatus|cytosol|endosome membrane|membrane|cytoplasmic membrane-bounded vesicle|cytoplasmic vesicle membrane|intracellular membrane-bounded organelle|protein complex|	cholesterol catabolic process|intracellular protein transport|receptor-mediated endocytosis|signal transduction|endosomal transport|regulation of endocytosis|	receptor binding|protein binding|protein C-terminus binding|phosphatidylinositol binding|low-density lipoprotein particle receptor binding|	10	-1.4	4.51	9	-1.6	6.93	-1.5	11	0.00511	-3	-0.6	0	0	0
ENSMUSG00000027937	JTB	jumping translocation breakpoint	cytoplasm|mitochondrion|centrosome|spindle|integral component of plasma membrane|membrane|midbody|	cytokinesis|mitotic nuclear division|apoptotic mitochondrial changes|regulation of cell proliferation|positive regulation of protein kinase activity|	protein kinase binding|	9	1	3.63	6	3.3	11	3.1	11	0.00511	1.4	5.7	0	0	0
ENSMUSG00000015357	CLPX	caseinolytic mitochondrial matrix peptidase chaperone subunit	mitochondrion|mitochondrial inner membrane|mitochondrial matrix|endopeptidase Clp complex|mitochondrial endopeptidase Clp complex|mitochondrial nucleoid|	ATP catabolic process|protein folding|positive regulation of peptidase activity|proteolysis involved in cellular protein catabolic process|	ATP-dependent peptidase activity|protein binding|ATP binding|peptidase activator activity|ATPase activity|ATPase activity|metal ion binding|unfolded protein binding|	10	1.5	1.11	10	1.4	10.2	1.4	11	0.00511	0.7	2.5	0	0	0
ENSMUSG00000020705	DDX42	DEAD (Asp-Glu-Ala-Asp) box helicase 42	nucleus|cytoplasm|Cajal body|membrane|nuclear speck|	ATP catabolic process|protein localization|	protein binding|ATP binding|ATP-dependent helicase activity|poly(A) RNA binding|	10	1.5	3.68	10	1.5	7.64	1.5	11	0.00511	0.6	3	0	0	0
ENSMUSG00000024853	SF3B2	splicing factor 3b, subunit 2, 145kDa	nucleus|nucleoplasm|spliceosomal complex|U12-type spliceosomal complex|catalytic step 2 spliceosome|	mRNA splicing, via spliceosome|mRNA splicing, via spliceosome|mRNA processing|RNA splicing|gene expression|viral process|	protein binding|poly(A) RNA binding|	7	1.5	3.05	8	1.2	8.64	1.3	11	0.00511	0.6	2.4	0	0	0
ENSMUSG00000079034	GM8300	predicted gene 8300	cellular_component|	biological_process|	molecular_function|	9	3.6	13.2	8	0.7	0.975	2	11	0.00511	0.7	6	0	0	0
ENSMUSG00000000579	DYNLT1C	dynein light chain Tctex-type 1C	cellular_component|	biological_process|	identical protein binding|	8	1.6	5.59	8	1.8	5.84	1.7	11	0.00511	0.8	3.1	0	0	0
ENSMUSG00000051401	KCTD16	potassium channel tetramerization domain containing 16	cell junction|presynaptic membrane|receptor complex|postsynaptic membrane|	regulation of G-protein coupled receptor protein signaling pathway|protein homooligomerization|	None	10	1.6	4.96	8	1.2	6.73	1.5	11	0.00511	0.7	3.1	0	0	0
ENSMUSG00000096255	DYNLT1B	dynein light chain Tctex-type 1B	Golgi apparatus|axonemal dynein complex|cytoplasmic dynein complex|cytoplasmic dynein complex|	microtubule-based process|	identical protein binding|	8	1.6	5.59	8	1.8	5.84	1.7	11	0.00511	0.8	3.1	0	0	0
ENSMUSG00000030512	SNRPA1	small nuclear ribonucleoprotein polypeptide A'	nucleus|nucleoplasm|spliceosomal complex|U2 snRNP|small nuclear ribonucleoprotein complex|catalytic step 2 spliceosome|	mRNA splicing, via spliceosome|mRNA splicing, via spliceosome|RNA splicing|gene expression|	protein binding|poly(A) RNA binding|	5	1.7	2.76	7	1.7	8.55	1.7	11	0.00511	0.9	3.6	0	0	0
ENSMUSG00000040697	DNAJC16	DnaJ (Hsp40) homolog, subfamily C, member 16	integral component of membrane|	cell redox homeostasis|	None	9	2.3	1.66	9	1.3	9.9	1.4	11	0.00511	0.6	2.9	0	0	0
ENSMUSG00000020180	SNRPD3	small nuclear ribonucleoprotein D3 polypeptide 18kDa	nucleus|nucleoplasm|spliceosomal complex|U7 snRNP|U1 snRNP|U4 snRNP|U12-type spliceosomal complex|cytoplasm|cytosol|cytosol|small nuclear ribonucleoprotein complex|methylosome|pICln-Sm protein complex|SMN-Sm protein complex|extracellular vesicular exosome|catalytic step 2 spliceosome|	spliceosomal snRNP assembly|spliceosomal snRNP assembly|mRNA splicing, via spliceosome|mRNA splicing, via spliceosome|transcription from RNA polymerase II promoter|termination of RNA polymerase II transcription|histone mRNA metabolic process|RNA splicing|gene expression|RNA metabolic process|mRNA 3'-end processing|ncRNA metabolic process|	protein binding|enzyme binding|poly(A) RNA binding|histone pre-mRNA DCP binding|	6	1	4.33	5	1.2	7.24	1.1	11	0.00511	0.6	1.9	0	0	0
ENSMUSG00000033237	ARID2	AT rich interactive domain 2 (ARID, RFX-like)	nucleus|	nucleosome disassembly|transcription, DNA-templated|regulation of transcription, DNA-templated|chromatin modification|	DNA binding|protein binding|metal ion binding|	10	0.5	1.74	10	2.4	10.1	2.5	11	0.00511	0.6	4.3	0	0	0
ENSMUSG00000038279	NOP2	NOP2 nucleolar protein	nucleolus|	rRNA processing|positive regulation of cell proliferation|methylation|	protein binding|S-adenosylmethionine-dependent methyltransferase activity|poly(A) RNA binding|	10	1.6	11.5	9	0.3	0.611	1.6	11	0.00511	0.7	3	0	0	0
ENSMUSG00000020079	SUPV3L1	suppressor of var1, 3-like 1 (S. cerevisiae)	nucleus|mitochondrion|mitochondrial matrix|mitochondrial nucleoid|mitochondrial degradosome|	mitochondrial mRNA catabolic process|positive regulation of mitochondrial RNA catabolic process|positive regulation of mitochondrial RNA catabolic process|mitochondrial RNA 3'-end processing|ATP catabolic process|DNA recombination|RNA catabolic process|positive regulation of cell growth|DNA duplex unwinding|mitochondrial ncRNA surveillance|mitochondrial mRNA surveillance|negative regulation of ap…	DNA binding|DNA helicase activity|RNA binding|double-stranded RNA binding|ATP-dependent RNA helicase activity|helicase activity|protein binding|ATP binding|3'-5' RNA helicase activity|protein homodimerization activity|poly(A) RNA binding|	5	1.5	3.13	4	2	8.59	1.9	11	0.00511	1	3.7	0	0	0
ENSMUSG00000026563	TADA1	transcriptional adaptor 1	nucleus|cytoplasm|focal adhesion|STAGA complex|	chromatin organization|transcription, DNA-templated|regulation of transcription, DNA-templated|histone H3 acetylation|	transcription coactivator activity|histone acetyltransferase activity|	7	1.8	4.05	7	1.5	7.57	1.6	11	0.00511	0.8	3.1	0	0	0
ENSMUSG00000032254	KIF23	kinesin family member 23	nucleus|nucleoplasm|centrosome|spindle|cytosol|kinesin complex|microtubule|midbody|intercellular bridge|mitotic spindle|centralspindlin complex|	mitotic spindle elongation|mitotic cell cycle|cytokinesis|microtubule-based movement|blood coagulation|metabolic process|metabolic process|antigen processing and presentation of exogenous peptide antigen via MHC class II|positive regulation of cytokinesis|spindle midzone assembly involved in mitosis|	microtubule motor activity|protein binding|ATP binding|microtubule binding|	7	1.2	5.52	8	1.7	6.43	1.3	11	0.00511	0.7	2.8	0	0	0
ENSMUSG00000025991	CPS1	carbamoyl-phosphate synthase 1, mitochondrial	nucleolus|mitochondrial inner membrane|mitochondrial matrix|mitochondrial nucleoid|protein complex|	urea cycle|urea cycle|glycogen catabolic process|proteolysis|glutamine catabolic process|midgut development|response to toxic substance|response to zinc ion|response to amine|citrulline biosynthetic process|triglyceride catabolic process|response to food|response to lipopolysaccharide|cellular nitrogen compound metabolic process|response to drug|response to starvation|response to amino acid|small…	carbamoyl-phosphate synthase (ammonia) activity|endopeptidase activity|calcium ion binding|protein binding|ATP binding|phospholipid binding|glutamate binding|protein complex binding|modified amino acid binding|	9	1.3	2.53	10	2.2	10.3	1.9	11	0.00511	0.8	3.7	0	0	0
ENSMUSG00000034932	MRPL54	mitochondrial ribosomal protein L54	mitochondrion|ribosome|	None	poly(A) RNA binding|	7	2	8.98	6	1.1	3.02	1.6	11	0.00511	0.8	3.4	0	0	0
ENSMUSG00000024927	RELA	v-rel avian reticuloendotheliosis viral oncogene homolog A	nucleus|nucleoplasm|transcription factor complex|cytoplasm|cytosol|cytosol|	negative regulation of transcription from RNA polymerase II promoter|liver development|hair follicle development|toll-like receptor signaling pathway|MyD88-dependent toll-like receptor signaling pathway|MyD88-independent toll-like receptor signaling pathway|acetaldehyde metabolic process|transcription from RNA polymerase II promoter|transcription from RNA polymerase II promoter|inflammatory respo…	RNA polymerase II core promoter proximal region sequence-specific DNA binding|RNA polymerase II distal enhancer sequence-specific DNA binding|RNA polymerase II core promoter proximal region sequence-specific DNA binding transcription factor activity involved in positive regulation of transcription|RNA polymerase II core promoter proximal region sequence-specific DNA binding transcription factor a…	10	-1	6.8	10	-0.8	4.74	-0.9	11	0.00511	-1.8	-0.4	0	0	0
ENSMUSG00000024791	CDCA5	cell division cycle associated 5	chromosome, centromeric region|nuclear chromatin|nucleus|nucleus|nucleoplasm|chromosome|cytoplasm|cytosol|plasma membrane|cohesin complex|	G1/S transition of mitotic cell cycle|mitotic cell cycle|double-strand break repair|mitotic sister chromatid cohesion|mitotic nuclear division|mitotic chromosome condensation|mitotic metaphase plate congression|mitotic interphase|regulation of cohesin localization to chromatin|	chromatin binding|protein binding|	9	1.8	9.92	10	1.1	2.64	1.7	11	0.00511	0.7	3	0	0	0
ENSMUSG00000025260	HSD17B10	hydroxysteroid (17-beta) dehydrogenase 10	cytoplasm|mitochondrion|mitochondrial inner membrane|mitochondrial matrix|endoplasmic reticulum|plasma membrane|	lipid metabolic process|tRNA processing|branched-chain amino acid catabolic process|cellular nitrogen compound metabolic process|small molecule metabolic process|oxidation-reduction process|	3-hydroxyacyl-CoA dehydrogenase activity|protein binding|cholate 7-alpha-dehydrogenase activity|testosterone dehydrogenase [NAD(P)] activity|poly(A) RNA binding|3-hydroxy-2-methylbutyryl-CoA dehydrogenase activity|	8	2	3.47	7	1.9	7.92	1.9	11	0.00511	0.8	3.7	0	0	0
ENSMUSG00000025142	ASPSCR1	alveolar soft part sarcoma chromosome region, candidate 1	cellular_component|nucleus|cytosol|cytoplasmic side of plasma membrane|endomembrane system|vesicle membrane|extrinsic component of membrane|perinuclear region of cytoplasm|	intracellular protein transport|biological_process|glucose homeostasis|regulation of glucose import|membrane organization|	molecular_function|protein binding|	10	2.8	12.5	10	0.9	0.428	2.3	11	0.00511	1.2	4.8	0	0	0
ENSMUSG00000058239	USF2	upstream transcription factor 2, c-fos interacting	nucleus|	regulation of transcription from RNA polymerase II promoter by glucose|positive regulation of transcription from RNA polymerase II promoter by glucose|positive regulation of transcription from RNA polymerase II promoter by glucose|transcription, DNA-templated|transcription from RNA polymerase II promoter|lactation|late viral transcription|positive regulation of transcription from RNA polymerase I…	RNA polymerase II core promoter proximal region sequence-specific DNA binding|double-stranded DNA binding|sequence-specific DNA binding transcription factor activity|RNA polymerase II distal enhancer sequence-specific DNA binding transcription factor activity|protein binding|protein homodimerization activity|bHLH transcription factor binding|sequence-specific DNA binding|protein heterodimerizatio…	9	1.7	6.21	8	2.2	5.61	1.7	11	0.00511	0.7	3.5	0	0	0
ENSMUSG00000033491	PRSS35	protease, serine, 35	extracellular region|mitochondrion|	metabolic process|	catalytic activity|	10	-0.7	1.61	10	1.3	11	1.3	11	0.00511	0.7	2.5	0	0	0
ENSMUSG00000026074	MAP4K4	mitogen-activated protein kinase kinase kinase kinase 4	cytoplasm|	protein phosphorylation|signal transduction by phosphorylation|intracellular signal transduction|regulation of JNK cascade|regulation of catalytic activity|	protein serine/threonine kinase activity|small GTPase regulator activity|protein binding|ATP binding|	10	-1.5	10.6	10	-0.6	1.34	-1.1	10.9	0.00525	-2.7	-0.4	0	0	0
ENSMUSG00000005951	SHPK	sedoheptulokinase	cytoplasm|	carbohydrate metabolic process|pentose-phosphate shunt, non-oxidative branch|phosphorylation|cellular response to interleukin-13|regulation of macrophage activation|regulation of inflammatory response|cellular response to lipopolysaccharide|cellular response to interleukin-4|	ATP binding|sedoheptulokinase activity|	10	2	9.12	10	1.8	2.21	1.9	10.9	0.00525	0.9	3.4	0	0	0
ENSMUSG00000014074	RNF168	ring finger protein 168, E3 ubiquitin protein ligase	ubiquitin ligase complex|nucleus|mitochondrion|site of double-strand break|	double-strand break repair|ubiquitin-dependent protein catabolic process|cellular response to DNA damage stimulus|response to ionizing radiation|protein ubiquitination|histone H2A monoubiquitination|interstrand cross-link repair|histone H2A-K13 ubiquitination|histone H2A-K15 ubiquitination|isotype switching|positive regulation of DNA repair|negative regulation of translational elongation|protein …	chromatin binding|ubiquitin-protein transferase activity|protein binding|zinc ion binding|ligase activity|nucleosome binding|histone binding|ubiquitin binding|K63-linked polyubiquitin binding|	8	1.4	6.3	6	1.1	5.06	1.3	10.9	0.00525	0.5	2.8	0	0	0
ENSMUSG00000022450	NDUFA6	NADH dehydrogenase (ubiquinone) 1 alpha subcomplex, 6, 14kDa	mitochondrial inner membrane|mitochondrial respiratory chain complex I|mitochondrial respiratory chain complex I|mitochondrial membrane|	mitochondrial electron transport, NADH to ubiquinone|response to oxidative stress|respiratory electron transport chain|cellular metabolic process|small molecule metabolic process|	NADH dehydrogenase (ubiquinone) activity|	8	1.6	5.45	8	1.5	5.81	1.6	10.9	0.00525	0.8	2.9	0	0	0
ENSMUSG00000033825	TPSB2	tryptase beta 2 (gene/pseudogene)	extracellular region|	proteolysis|	serine-type endopeptidase activity|serine-type peptidase activity|	9	1.2	4.31	9	2.2	7.3	1.9	10.9	0.00525	0.7	3.6	0	0	0
ENSMUSG00000020664	DLD	dihydrolipoamide dehydrogenase	nucleus|mitochondrion|mitochondrial matrix|cilium|acrosomal matrix|	pyruvate metabolic process|tricarboxylic acid cycle|mitochondrial electron transport, NADH to ubiquinone|proteolysis|lysine catabolic process|gastrulation|branched-chain amino acid catabolic process|regulation of acetyl-CoA biosynthetic process from pyruvate|cellular nitrogen compound metabolic process|regulation of membrane potential|cellular metabolic process|small molecule metabolic process|ce…	dihydrolipoyl dehydrogenase activity|flavin adenine dinucleotide binding|	7	1.5	5.69	7	1.7	5.76	1.6	10.9	0.00525	0.8	3.1	0	0	0
ENSMUSG00000029017	PMPCB	peptidase (mitochondrial processing) beta	mitochondrial inner membrane|mitochondrial matrix|	proteolysis|protein targeting to mitochondrion|cellular protein metabolic process|	metalloendopeptidase activity|metal ion binding|	2	0.5	0.523	5	1.7	11.3	1.7	10.9	0.00525	0.9	2.9	0	0	0
ENSMUSG00000022752	TOMM70A	translocase of outer mitochondrial membrane 70 homolog A (S. cerevisiae)	mitochondrion|mitochondrial outer membrane translocase complex|membrane|integral component of membrane|	protein targeting to mitochondrion|cellular protein metabolic process|protein transmembrane transport|	protein binding|protein transmembrane transporter activity|	7	2.5	6	6	2.4	5.27	2.5	10.9	0.00525	1.2	4.4	0	0	0
ENSMUSG00000031969	ACAD8	acyl-CoA dehydrogenase family, member 8	mitochondrial matrix|	transcription, DNA-templated|regulation of transcription, DNA-templated|valine catabolic process|lipid metabolic process|branched-chain amino acid catabolic process|cellular nitrogen compound metabolic process|small molecule metabolic process|oxidation-reduction process|	acyl-CoA dehydrogenase activity|flavin adenine dinucleotide binding|	10	1.4	4.5	10	1.3	6.79	1.3	10.9	0.00525	0.6	2.3	0	0	0
ENSMUSG00000015461	ATF6B	activating transcription factor 6 beta	intracellular|nucleus|endoplasmic reticulum membrane|integral component of membrane|	transcription, DNA-templated|regulation of transcription, DNA-templated|response to unfolded protein|signal transduction|	sequence-specific DNA binding transcription factor activity|protein binding|sequence-specific DNA binding|	8	3.3	9.42	9	1.8	2.51	1.8	10.9	0.00525	0.6	5	0	0	0
ENSMUSG00000031976	URB2	URB2 ribosome biogenesis 2 homolog (S. cerevisiae)	nucleus|nucleolus|aggresome|	None	None	7	1.9	4.58	8	2.7	7.74	2.3	10.9	0.00525	1.1	4.4	0	0	0
ENSMUSG00000068349	GML	glycosylphosphatidylinositol anchored molecule like	plasma membrane|extrinsic component of membrane|anchored component of membrane|	apoptotic process|DNA damage response, signal transduction by p53 class mediator resulting in cell cycle arrest|negative regulation of cell proliferation|	None	9	2	6.63	9	2.7	5.33	2.2	10.9	0.00525	0.8	4.3	0	0	0
ENSMUSG00000006589	APRT	adenine phosphoribosyltransferase	nucleus|cytoplasm|cytoplasm|cytosol|extracellular vesicular exosome|	purine nucleobase metabolic process|purine ribonucleoside salvage|adenine salvage|lactation|grooming behavior|cellular response to insulin stimulus|purine-containing compound salvage|AMP salvage|small molecule metabolic process|nucleobase-containing small molecule metabolic process|	adenine binding|adenine phosphoribosyltransferase activity|AMP binding|	9	1.3	8.93	9	1.1	2.42	1.2	10.9	0.00525	0.6	3.1	0	0	0
ENSMUSG00000022023	WBP4	WW domain binding protein 4	nucleus|spliceosomal complex|plasma membrane|nuclear speck|	mRNA cis splicing, via spliceosome|	nucleic acid binding|protein binding|zinc ion binding|proline-rich region binding|	9	1.5	7.27	8	2.1	4.49	1.5	10.9	0.00525	0.7	3.3	0	0	0
ENSMUSG00000054405	DNAJC8	DnaJ (Hsp40) homolog, subfamily C, member 8	nucleoplasm|	mRNA splicing, via spliceosome|RNA splicing|gene expression|	None	9	1.4	4.51	8	2	7.59	1.7	10.9	0.00525	0.7	3.3	0	0	0
ENSMUSG00000061524	ZIC2	Zic family member 2	nucleus|cytoplasm|	neural tube closure|transcription, DNA-templated|brain development|visual perception|retinal ganglion cell axon guidance|negative regulation of transcription, DNA-templated|positive regulation of transcription, DNA-templated|developmental pigmentation|positive regulation of sequence-specific DNA binding transcription factor activity|	DNA binding|sequence-specific DNA binding transcription factor activity|chromatin DNA binding|metal ion binding|	9	1.7	7.51	10	1	4.28	1.8	10.8	0.00541	0.6	3.1	0	0	0
ENSMUSG00000079409	GM5795	predicted gene 5795	cellular_component|	biological_process|	molecular_function|	8	1.4	3.38	8	2.3	9.4	2.2	10.8	0.00541	0.9	4	0	0	0
ENSMUSG00000020576	NBAS	neuroblastoma amplified sequence	cytoplasm|membrane|	nuclear-transcribed mRNA catabolic process|negative regulation of nuclear-transcribed mRNA catabolic process, nonsense-mediated decay|	None	9	1.9	9.48	8	1.1	2.5	1.7	10.8	0.00541	0.7	3.1	0	0	0
ENSMUSG00000037580	GCH1	GTP cyclohydrolase 1	nucleus|cytoplasm|cytosol|cytosol|cytoplasmic vesicle|nuclear membrane|protein complex|	GTP catabolic process|tetrahydrobiopterin biosynthetic process|tetrahydrobiopterin biosynthetic process|nitric oxide biosynthetic process|metabolic process|regulation of blood pressure|regulation of lung blood pressure|response to lipopolysaccharide|response to interferon-gamma|response to tumor necrosis factor|7,8-dihydroneopterin 3'-triphosphate biosynthetic process|vasodilation|dopamine biosyn…	GTP cyclohydrolase I activity|calcium ion binding|protein binding|GTP binding|zinc ion binding|GTP-dependent protein binding|protein homodimerization activity|coenzyme binding|	8	2.9	7.43	10	3.3	3.84	2.9	10.8	0.00541	0.8	4.9	0	0	0
ENSMUSG00000031400	G6PDX	glucose-6-phosphate dehydrogenase X-linked	nucleus|cytoplasm|cytosol|cytoplasmic side of plasma membrane|membrane|intracellular membrane-bounded organelle|extracellular vesicular exosome|	cytokine production|cytokine production|angiotensin mediated vasoconstriction involved in regulation of systemic arterial blood pressure|vasodilation by angiotensin involved in regulation of systemic arterial blood pressure|carbohydrate metabolic process|glucose metabolic process|pentose-phosphate shunt|cholesterol biosynthetic process|NADP metabolic process|NADPH regeneration|NADP biosynthetic p…	glucose-6-phosphate dehydrogenase activity|glucose-6-phosphate dehydrogenase activity|glucose-6-phosphate dehydrogenase activity|glucose binding|oxidoreductase activity|carbohydrate binding|protein homodimerization activity|protein homodimerization activity|NADP binding|	9	2	11.2	7	1.1	0.964	1.9	10.8	0.00541	0.8	3.4	0	0	0
ENSMUSG00000024462	GABBR1	gamma-aminobutyric acid (GABA) B receptor, 1	extracellular region|cytoplasm|plasma membrane|integral component of plasma membrane|cell junction|dendrite|G-protein coupled receptor heterodimeric complex|presynaptic membrane|postsynaptic membrane|	adenylate cyclase-inhibiting G-protein coupled receptor signaling pathway|negative regulation of adenylate cyclase activity|gamma-aminobutyric acid signaling pathway|synaptic transmission|	G-protein coupled GABA receptor activity|G-protein coupled GABA receptor activity|protein binding|	8	2	8.3	6	1.2	3.55	1.7	10.8	0.00541	0.7	3.3	0	0	0
ENSMUSG00000018340	ANXA6	annexin A6	lysosomal membrane|membrane|late endosome membrane|melanosome|perinuclear region of cytoplasm|extracellular vesicular exosome|	calcium ion transport|regulation of muscle contraction|ion transmembrane transport|protein homooligomerization|	calcium ion binding|protein binding|GTP binding|calcium-dependent phospholipid binding|lipid binding|ligand-gated ion channel activity|cholesterol binding|protein homodimerization activity|calcium-dependent protein binding|	10	-0.4	0.0258	10	2.2	13	2	10.8	0.00541	0.8	3.8	0	0	0
ENSMUSG00000031954	CFDP1	craniofacial development protein 1	cellular_component|	cell adhesion|multicellular organismal development|biological_process|regulation of cell shape|regulation of cell proliferation|negative regulation of fibroblast apoptotic process|	molecular_function|	8	0.7	1.63	10	2	11.7	1.9	10.8	0.00541	0.8	3.7	0	0	0
ENSMUSG00000013160	ATP6V0D1	ATPase, H+ transporting, lysosomal 38kDa, V0 subunit d1	lysosomal membrane|early endosome|centrosome|synaptic vesicle|endosome membrane|membrane|apical plasma membrane|vacuolar proton-transporting V-type ATPase complex|vacuolar proton-transporting V-type ATPase complex|phagocytic vesicle membrane|proton-transporting V-type ATPase, V0 domain|axon terminus|extracellular vesicular exosome|	cellular iron ion homeostasis|activation of signaling protein activity involved in unfolded protein response|brain development|insulin receptor signaling pathway|ATP hydrolysis coupled proton transport|proton transport|endoplasmic reticulum unfolded protein response|transferrin transport|cilium assembly|cellular protein metabolic process|interaction with host|transmembrane transport|phagosome mat…	protein binding|hydrogen-exporting ATPase activity, phosphorylative mechanism|protein complex binding|	5	1.3	0.658	7	2.8	11	1.5	10.8	0.00541	0.7	4.8	0	0	0
ENSMUSG00000024863	MBL2	mannose-binding lectin (protein C) 2, soluble	extracellular region|collagen trimer|extracellular space|cell surface|	complement activation, lectin pathway|complement activation, lectin pathway|complement activation, lectin pathway|acute-phase response|complement activation|complement activation, classical pathway|response to oxidative stress|opsonization|defense response to bacterium|negative regulation of growth of symbiont in host|innate immune response|innate immune response|negative regulation of viral proc…	receptor binding|protein binding|mannose binding|mannose binding|mannose binding|calcium-dependent protein binding|	9	1.4	7.84	9	1.2	3.44	1.3	10.8	0.00541	0.6	2.6	0	0	0
ENSMUSG00000032034	KCNJ5	potassium inwardly-rectifying channel, subfamily J, member 5	plasma membrane|voltage-gated potassium channel complex|	potassium ion transport|synaptic transmission|regulation of ion transmembrane transport|potassium ion transmembrane transport|potassium ion transmembrane transport|potassium ion transmembrane transport|	inward rectifier potassium channel activity|protein binding|G-protein activated inward rectifier potassium channel activity|	8	2.3	6.26	9	1.2	6.24	1.5	10.8	0.00541	0.6	3.2	0	0	0
ENSMUSG00000085793	LIN52	lin-52 DREAM MuvB core complex component	nucleoplasm|DRM complex|	G2/M transition of mitotic cell cycle|mitotic cell cycle|transcription, DNA-templated|regulation of cell cycle|	None	6	1.7	2.77	7	1.2	9.05	1.4	10.8	0.00541	0.6	2.9	0	0	0
ENSMUSG00000036833	PNPLA7	patatin-like phospholipase domain containing 7	lysosomal membrane|endoplasmic reticulum|integral component of membrane|nuclear membrane|mitochondrial membrane|	lipid metabolic process|	hydrolase activity|	8	3.4	10.4	8	0.7	3.37	0.9	10.8	0.00541	0.4	5	0	0	0
ENSMUSG00000022435	UPK3A	uroplakin 3A	endoplasmic reticulum membrane|integral component of membrane|apical plasma membrane|extracellular vesicular exosome|	cell morphogenesis|kidney development|water transport|urea transport|epithelial cell differentiation|potassium ion homeostasis|sodium ion homeostasis|urinary bladder development|	None	9	-0.5	0.713	9	1.8	11.7	1.9	10.8	0.00541	0.9	3.8	0	0	0
ENSMUSG00000039108	LSM14B	LSM14B, SCD6 homolog B (S. cerevisiae)	ribonucleoprotein complex|	regulation of translation|multicellular organismal development|	poly(A) RNA binding|	7	-0.7	0.936	10	1.7	12.4	1.5	10.8	0.00541	0.7	3	0	0	0
ENSMUSG00000010054	TUSC2	tumor suppressor candidate 2	mitochondrion|	natural killer cell differentiation|inflammatory response|cell cycle|cell-cell signaling|cell proliferation|interleukin-15 production|cell maturation|regulation of mitochondrial membrane potential|chemokine (C-C motif) ligand 5 production|regulation of reactive oxygen species metabolic process|	None	10	1.2	2.69	9	1.8	9.15	1.5	10.8	0.00541	0.7	3.2	0	0	0
ENSMUSG00000030722	NFATC2IP	nuclear factor of activated T-cells, cytoplasmic, calcineurin-dependent 2 interacting protein	nucleus|cytoplasm|	cytokine production|regulation of transcription, DNA-templated|	None	8	-0.3	0.739	10	1.4	13.1	1.4	10.8	0.00541	0.6	3	0	0	0
ENSMUSG00000021714	CENPK	centromere protein K	condensed chromosome kinetochore|nucleoplasm|cytosol|	mitotic cell cycle|nucleosome assembly|centromere-specific nucleosome assembly|positive regulation of transcription from RNA polymerase II promoter|	None	8	0.4	0.527	9	2.2	12.1	1.9	10.8	0.00541	0.7	3.8	0	0	0
ENSMUSG00000065952	C330021F23RIK	RIKEN cDNA C330021F23 gene	intrinsic component of membrane|	negative regulation of protein phosphorylation|positive regulation of protein kinase A signaling|beta-amyloid metabolic process|negative regulation of beta-amyloid formation|	adenylate cyclase binding|	7	1.3	1.33	5	1.6	9.9	1.5	10.8	0.00541	0.8	3.4	0	0	0
ENSMUSG00000017485	TOP2B	topoisomerase (DNA) II beta 180kDa	heterochromatin|nucleus|nucleoplasm|cytoplasm|cytosol|DNA topoisomerase complex (ATP-hydrolyzing)|	resolution of meiotic recombination intermediates|sister chromatid segregation|neuron migration|ATP catabolic process|ATP catabolic process|DNA topological change|DNA unwinding involved in DNA replication|mitotic recombination|axonogenesis|forebrain development|mitotic DNA integrity checkpoint|	chromatin binding|DNA topoisomerase type II (ATP-hydrolyzing) activity|protein kinase C binding|ATP binding|protein C-terminus binding|DNA binding, bending|enzyme binding|histone deacetylase binding|metal ion binding|protein heterodimerization activity|	9	2.6	11.9	9	0.8	2.47	2.5	10.8	0.00541	0.8	4.1	0	0	0
ENSMUSG00000026926	PMPCA	peptidase (mitochondrial processing) alpha	extracellular space|mitochondrion|mitochondrial inner membrane|mitochondrial matrix|	proteolysis|protein targeting to mitochondrion|cellular protein metabolic process|	metalloendopeptidase activity|metal ion binding|	5	0.9	2.14	6	2.8	11.2	2.7	10.8	0.00541	0.9	5.3	0	0	0
ENSMUSG00000010097	NXF1	nuclear RNA export factor 1	transcription export complex|nuclear pore|nucleoplasm|cytosol|nuclear speck|nuclear inclusion body|	mRNA export from nucleus|mRNA export from nucleus|gene expression|viral process|poly(A)+ mRNA export from nucleus|	nucleotide binding|mRNA binding|nucleocytoplasmic transporter activity|protein binding|poly(A) RNA binding|	8	1.6	5.67	7	1.3	5.71	1.4	10.8	0.00541	0.6	2.9	0	0	0
ENSMUSG00000028540	DPH2	DPH2 homolog (S. cerevisiae)	cytoplasm|	peptidyl-diphthamide biosynthetic process from peptidyl-histidine|	None	10	-0.9	4	10	-1.3	7.66	-1.2	10.8	0.00541	-2.1	-0.5	0	0	0
ENSMUSG00000016239	LONRF3	LON peptidase N-terminal domain and ring finger 3	None	ATP catabolic process|proteolysis|	ATP-dependent peptidase activity|protein binding|zinc ion binding|	9	1.5	6.79	9	1.6	4.41	1.6	10.8	0.00541	0.7	2.8	0	0	0
ENSMUSG00000062210	TNFAIP8	tumor necrosis factor, alpha-induced protein 8	cytoplasm|	negative regulation of apoptotic process|negative regulation of cysteine-type endopeptidase activity involved in apoptotic process|	cysteine-type endopeptidase inhibitor activity involved in apoptotic process|	9	0.9	1.33	10	1.4	10.2	1.4	10.8	0.00541	0.6	2.7	0	0	0
ENSMUSG00000025857	HEATR2	HEAT repeat containing 2	cytoplasm|	None	None	8	1.5	4.87	8	1.4	6.17	1.4	10.7	0.00558	0.5	3.1	0	0	0
ENSMUSG00000044744	1700001G17RIK	RIKEN cDNA 1700001G17 gene	cellular_component|	biological_process|	molecular_function|	9	1.6	8.14	9	1	2.95	1.6	10.7	0.00558	0.6	2.9	0	0	0
ENSMUSG00000015852	FCRLS	Fc receptor-like S, scavenger receptor	None	None	None	9	3	5.09	10	1.4	7.62	1.6	10.7	0.00558	0.7	3.9	0	0	0
ENSMUSG00000024414	MRPL27	mitochondrial ribosomal protein L27	mitochondrial large ribosomal subunit|	translation|	structural constituent of ribosome|poly(A) RNA binding|	8	2.1	8.25	9	1.3	4.03	1.8	10.7	0.00558	0.7	3.2	0	0	0
ENSMUSG00000057278	SNRPG	small nuclear ribonucleoprotein polypeptide G	nucleoplasm|spliceosomal complex|U7 snRNP|U1 snRNP|U4 snRNP|U12-type spliceosomal complex|cytosol|cytosol|small nuclear ribonucleoprotein complex|methylosome|SMN-Sm protein complex|catalytic step 2 spliceosome|	spliceosomal complex assembly|spliceosomal snRNP assembly|spliceosomal snRNP assembly|mRNA splicing, via spliceosome|mRNA splicing, via spliceosome|transcription from RNA polymerase II promoter|termination of RNA polymerase II transcription|histone mRNA metabolic process|RNA splicing|gene expression|RNA metabolic process|mRNA 3'-end processing|ncRNA metabolic process|	protein binding|poly(A) RNA binding|	7	1.3	8.35	1	2.2	3.86	1.5	10.7	0.00558	0.7	3.5	0	0	0
ENSMUSG00000027668	MFN1	mitofusin 1	mitochondrial outer membrane|integral component of membrane|	GTP catabolic process|mitochondrial fusion|mitochondrial fusion|	GTPase activity|protein binding|GTP binding|	10	1.5	4.14	10	2.3	7.6	1.8	10.7	0.00558	0.7	3.4	0	0	0
ENSMUSG00000074846	GM10774	polymerase (RNA) II (DNA directed) polypeptide L pseudogene	None	None	None	8	2.6	0.767	8	2.4	10.3	2.4	10.7	0.00558	1.5	4.6	0	0	0
ENSMUSG00000027907	S100A11	S100 calcium binding protein A11	ruffle|extracellular space|nucleus|cytoplasm|cytoplasm|extracellular vesicular exosome|	signal transduction|negative regulation of DNA replication|negative regulation of cell proliferation|	calcium ion binding|protein binding|protein homodimerization activity|S100 protein binding|calcium-dependent protein binding|	8	2.2	5.02	8	1.6	6.16	1.6	10.7	0.00558	0.7	3.5	0	0	0
ENSMUSG00000041498	KIF14	kinesin family member 14	nucleus|cytoplasm|spindle|kinesin complex|microtubule|membrane|	microtubule-based movement|metabolic process|regulation of cell adhesion|regulation of cell migration|regulation of Rap protein signal transduction|negative regulation of integrin activation|substrate adhesion-dependent cell spreading|establishment of protein localization|	microtubule motor activity|protein binding|ATP binding|microtubule binding|PDZ domain binding|	10	1.9	6.89	10	1.3	4.35	1.9	10.7	0.00558	0.6	3.3	0	0	0
ENSMUSG00000029253	CENPC1	centromere protein C1	chromosome, centromeric region|kinetochore|condensed nuclear chromosome, centromeric region|nucleus|chromosome|centromeric heterochromatin|cytoplasm|	mitotic cell cycle|cell cycle|chromosome segregation|mitotic nuclear division|cell division|kinetochore assembly|	DNA binding|protein binding|centromeric DNA binding|	8	1.9	9.56	9	3.7	3.85	2.1	10.7	0.00558	0.9	5.3	0	0	0
ENSMUSG00000095923	IGHV1-37	immunoglobulin heavy variable 1-37	None	None	None	7	2.3	12	7	-0.3	0.37	2.3	10.6	0.00575	0.9	4.2	0	0	0
ENSMUSG00000021576	PDCD6	programmed cell death 6	nucleus|cytoplasm|endosome|endoplasmic reticulum|endoplasmic reticulum membrane|cytoplasmic vesicle|nuclear membrane|extracellular vesicular exosome|	angiogenesis|positive regulation of endothelial cell proliferation|proteolysis|intracellular protein transport|activation of cysteine-type endopeptidase activity involved in apoptotic process|positive regulation of endothelial cell migration|negative regulation of vascular endothelial growth factor receptor signaling pathway|negative regulation of TOR signaling|cellular response to heat|vascular …	calcium-dependent cysteine-type endopeptidase activity|calcium ion binding|protein binding|protein homodimerization activity|protein dimerization activity|calcium-dependent protein binding|binding, bridging|	8	1.1	2.33	7	2	9.82	1.6	10.6	0.00575	0.7	3.3	0	0	0
ENSMUSG00000053916	NANP	N-acetylneuraminic acid phosphatase	cellular_component|	carbohydrate metabolic process|N-acetylglucosamine biosynthetic process|dephosphorylation|dephosphorylation|N-acetylneuraminate biosynthetic process|	N-acylneuraminate-9-phosphatase activity|	9	1.8	8.82	9	1.6	2.22	1.7	10.6	0.00575	0.7	3.2	0	0	0
ENSMUSG00000041769	PPP2R2D	protein phosphatase 2, regulatory subunit B, delta	protein phosphatase type 2A complex|cytoplasm|	mitotic cell cycle|mitotic nuclear division|signal transduction|exit from mitosis|regulation of catalytic activity|regulation of catalytic activity|	protein phosphatase type 2A regulator activity|	9	1.4	3.85	9	1.5	7.16	1.5	10.6	0.00575	0.7	2.5	0	0	0
ENSMUSG00000006699	CDC42	cell division cycle 42	Golgi membrane|cytoplasm|microtubule organizing center|cytosol|plasma membrane|plasma membrane|membrane|secretory granule|filopodium|midbody|cytoplasmic ribonucleoprotein granule|neuron projection|neuronal cell body|apical part of cell|spindle midzone|extracellular vesicular exosome|mitotic spindle|	sprouting angiogenesis|cardiac conduction system development|keratinocyte development|GTP catabolic process|Golgi organization|regulation of mitosis|nuclear migration|establishment or maintenance of cell polarity|epidermal growth factor receptor signaling pathway|small GTPase mediated signal transduction|axon guidance|blood coagulation|positive regulation of gene expression|negative regulation of…	GTPase activity|protein binding|GTP binding|protein kinase binding|protein kinase binding|GTP-dependent protein binding|mitogen-activated protein kinase kinase kinase binding|thioesterase binding|apolipoprotein A-I receptor binding|identical protein binding|	8	1.3	6.57	7	1.6	4.59	1.5	10.6	0.00575	0.7	3.2	0	0	0
ENSMUSG00000004933	MATK	megakaryocyte-associated tyrosine kinase	cytosol|membrane|	protein phosphorylation|mesoderm development|cell proliferation|positive regulation of cell proliferation|peptidyl-tyrosine phosphorylation|peptidyl-tyrosine phosphorylation|	protein tyrosine kinase activity|non-membrane spanning protein tyrosine kinase activity|protein binding|ATP binding|	10	-1.5	10.9	9	-0.7	0.324	-1.4	10.6	0.00575	-2.8	-0.5	0	0	0
ENSMUSG00000094885	OTT	ovary testis transcribed	cellular_component|	biological_process|	molecular_function|	10	1.9	9.35	10	1.3	2.41	1.7	10.6	0.00575	0.7	3	0	0	0
ENSMUSG00000031533	MRPS31	mitochondrial ribosomal protein S31	nucleolus|mitochondrion|mitochondrial small ribosomal subunit|	None	structural constituent of ribosome|protein binding|protein domain specific binding|poly(A) RNA binding|	10	1.4	4.21	7	2	7.13	1.6	10.6	0.00575	0.6	3.3	0	0	0
ENSMUSG00000042772	SMG7	SMG7 nonsense mediated mRNA decay factor	nucleus|cytoplasm|cytosol|intermediate filament cytoskeleton|	nuclear-transcribed mRNA catabolic process, nonsense-mediated decay|mRNA export from nucleus|gene expression|RNA metabolic process|mRNA metabolic process|regulation of dephosphorylation|	protein binding|protein phosphatase 2A binding|	9	1.5	8.09	8	1.9	3.15	1.5	10.6	0.00575	0.6	3.1	0	0	0
ENSMUSG00000056091	ST3GAL5	ST3 beta-galactoside alpha-2,3-sialyltransferase 5	Golgi membrane|integral component of plasma membrane|integral component of membrane|integral component of Golgi membrane|	ganglioside biosynthetic process|carbohydrate metabolic process|protein glycosylation|glycosphingolipid biosynthetic process|sialylation|sialylation|sialylation|	neolactotetraosylceramide alpha-2,3-sialyltransferase activity|sialyltransferase activity|lactosylceramide alpha-2,3-sialyltransferase activity|	8	2.6	4.21	9	2.4	6.8	2.5	10.6	0.00575	0.8	4.4	0	0	0
ENSMUSG00000094941	GM15093	predicted gene 15093	cellular_component|	biological_process|	molecular_function|	10	1.9	9.35	10	1.3	2.41	1.7	10.6	0.00575	0.7	3	0	0	0
ENSMUSG00000038079	TMEM237	transmembrane protein 237	membrane|integral component of membrane|ciliary transition zone|	regulation of Wnt signaling pathway|cilium assembly|	None	10	0.3	0.342	10	-2.4	13.1	-1.9	10.6	0.00575	-4.6	-0.7	0	0	0
ENSMUSG00000070847	VMN2R30	vomeronasal 2, receptor 30	plasma membrane|membrane|integral component of membrane|	signal transduction|G-protein coupled receptor signaling pathway|	signal transducer activity|G-protein coupled receptor activity|	8	1.9	11.7	5	-0.6	0.28	1.9	10.6	0.00575	0.8	4.5	0	0	0
ENSMUSG00000024621	CSF1R	colony stimulating factor 1 receptor	plasma membrane|integral component of plasma membrane|cell surface|receptor complex|	positive regulation of protein phosphorylation|inflammatory response|signal transduction|transmembrane receptor protein tyrosine kinase signaling pathway|multicellular organismal development|cell proliferation|positive regulation of cell proliferation|regulation of cell shape|peptidyl-tyrosine phosphorylation|cytokine-mediated signaling pathway|hemopoiesis|monocyte differentiation|macrophage diff…	macrophage colony-stimulating factor receptor activity|ATP binding|protein phosphatase binding|cytokine binding|cytokine binding|protein homodimerization activity|	10	2	10	7	1.2	1.61	1.9	10.6	0.00575	0.8	3.7	0	0	0
ENSMUSG00000075101	OLFR1222	olfactory receptor 1222	plasma membrane|membrane|integral component of membrane|	signal transduction|G-protein coupled receptor signaling pathway|sensory perception of smell|response to stimulus|detection of chemical stimulus involved in sensory perception of smell|	signal transducer activity|G-protein coupled receptor activity|olfactory receptor activity|	10	0.4	0.686	10	2	11.1	1.8	10.6	0.00575	0.7	3.5	0	0	0
ENSMUSG00000055334	SNUPN	snurportin 1	nuclear pore|cytosol|extracellular vesicular exosome|	spliceosomal snRNP assembly|protein import into nucleus|gene expression|RNA metabolic process|ncRNA metabolic process|snRNA import into nucleus|	RNA cap binding|protein transporter activity|	10	2.5	4.29	8	1.5	7.15	1.7	10.6	0.00575	0.7	3.4	0	0	0
ENSMUSG00000026683	NUF2	NUF2, NDC80 kinetochore complex component	chromosome, centromeric region|condensed chromosome kinetochore|nucleus|cytosol|membrane|Ndc80 complex|	mitotic cell cycle|chromosome segregation|mitotic nuclear division|	molecular_function|protein binding|	4	2.6	12.2	3	-0.4	0.0238	2.5	10.6	0.00575	1.4	4.9	0	0	0
ENSMUSG00000039304	TNFSF10	tumor necrosis factor (ligand) superfamily, member 10	extracellular region|extracellular space|integral component of plasma membrane|extracellular vesicular exosome|	apoptotic process|activation of cysteine-type endopeptidase activity involved in apoptotic process|immune response|signal transduction|cell-cell signaling|male gonad development|response to insulin|positive regulation of apoptotic process|positive regulation of I-kappaB kinase/NF-kappaB signaling|positive regulation of cysteine-type endopeptidase activity involved in apoptotic process|positive re…	receptor binding|cytokine activity|tumor necrosis factor receptor binding|protein binding|metal ion binding|	10	2.8	12.7	8	0.1	0.0319	2.7	10.6	0.00575	1.2	5.1	0	0	0
ENSMUSG00000076508	IGKV17-127	immunoglobulin kappa variable 17-127	None	None	None	10	2	10.3	9	1	1.35	1.6	10.6	0.00575	0.7	3.4	0	0	0
ENSMUSG00000029726	MEPCE	methylphosphate capping enzyme	None	negative regulation of transcription from RNA polymerase II promoter|RNA methylation|snRNA metabolic process|negative regulation of chromatin binding|snRNA modification|positive regulation of G1/S transition of mitotic cell cycle|	RNA methyltransferase activity|S-adenosylmethionine-dependent methyltransferase activity|poly(A) RNA binding|	7	3.3	12.5	6	0.7	0.229	3.3	10.6	0.00575	0.7	5.7	0	0	0
ENSMUSG00000014164	KLHL3	kelch-like family member 3	cytosol|cytoskeleton|Cul3-RING ubiquitin ligase complex|Cul3-RING ubiquitin ligase complex|	protein ubiquitination|protein ubiquitination|protein ubiquitination involved in ubiquitin-dependent protein catabolic process|ion homeostasis|renal sodium ion absorption|protein K48-linked ubiquitination|distal tubule morphogenesis|	actin binding|structural molecule activity|protein binding|	10	1.9	4.25	10	2.4	7	2	10.6	0.00575	1	3.9	0	0	0
ENSMUSG00000004788	EIF2B2	eukaryotic translation initiation factor 2B, subunit 2 beta, 39kDa	cytoplasm|cytosol|eukaryotic translation initiation factor 2B complex|	ovarian follicle development|translation|translational initiation|translational initiation|regulation of translational initiation|regulation of translational initiation|central nervous system development|response to heat|response to heat|response to glucose|gene expression|oligodendrocyte development|myelination|response to peptide hormone|positive regulation of GTPase activity|positive regulatio…	translation initiation factor activity|guanyl-nucleotide exchange factor activity|guanyl-nucleotide exchange factor activity|protein binding|ATP binding|GTP binding|	5	0.5	1.02	7	2.3	11.9	2.2	10.6	0.00575	0.7	4.3	0	0	0
ENSMUSG00000028773	FABP3	fatty acid binding protein 3, muscle and heart (mammary-derived growth inhibitor)	extracellular space|cytosol|sarcoplasm|extracellular vesicular exosome|	fatty acid metabolic process|negative regulation of cell proliferation|response to insulin|response to drug|cholesterol homeostasis|long-chain fatty acid import|regulation of fatty acid oxidation|phospholipid homeostasis|response to fatty acid|positive regulation of phospholipid biosynthetic process|	long-chain fatty acid transporter activity|protein binding|cytoskeletal protein binding|long-chain fatty acid binding|icosatetraenoic acid binding|oleic acid binding|	9	3.7	9.11	10	1.5	5.03	2.2	10.6	0.00575	0.8	5.6	0	0	0
ENSMUSG00000029465	ARPC3	actin related protein 2/3 complex, subunit 3, 21kDa	cytosol|Arp2/3 protein complex|actin cytoskeleton|membrane|lamellipodium|extracellular vesicular exosome|	cellular component movement|Arp2/3 complex-mediated actin nucleation|Fc-gamma receptor signaling pathway involved in phagocytosis|innate immune response|	actin binding|structural constituent of cytoskeleton|protein binding|	10	-1.6	12.2	8	1.6	3.19	-1.6	10.6	0.00575	-3.5	-0.6	0	0	0
ENSMUSG00000070383	OLFR389	olfactory receptor 389	plasma membrane|membrane|integral component of membrane|	signal transduction|G-protein coupled receptor signaling pathway|sensory perception of smell|response to stimulus|detection of chemical stimulus involved in sensory perception of smell|	signal transducer activity|G-protein coupled receptor activity|olfactory receptor activity|	10	-0.8	2.47	10	-1.6	9.38	-1.4	10.6	0.00575	-2.9	-0.6	0	0	0
ENSMUSG00000036246	GMIP	GEM interacting protein	intracellular|cytosol|	small GTPase mediated signal transduction|positive regulation of Rho GTPase activity|negative regulation of Rho GTPase activity|intracellular signal transduction|regulation of small GTPase mediated signal transduction|	Rho GTPase activator activity|protein binding|metal ion binding|	10	-2.2	12.8	10	-0.2	0.263	-2	10.6	0.00575	-3.7	-0.7	0	0	0
ENSMUSG00000095621	GM15085	predicted gene 15085	cellular_component|	biological_process|	molecular_function|	10	1.9	9.35	10	1.3	2.41	1.7	10.6	0.00575	0.7	3	0	0	0
ENSMUSG00000037086	1110059M19RIK	N/A	None	None	None	10	4.4	13.9	10	-0.6	0.61	4.4	10.6	0.00575	1.1	8	0	0	0
ENSMUSG00000027744	STOML3	stomatin (EPB72)-like 3	plasma membrane|cilium|integral component of membrane|membrane raft|	signal transduction|	None	10	1.1	6.13	10	1.6	5.99	1.4	10.6	0.00575	0.6	2.6	0	0	0
ENSMUSG00000050751	PGBD5	piggyBac transposable element derived 5	integral component of membrane|	None	None	10	1.3	4.72	10	1.3	6.22	1.3	10.6	0.00575	0.5	2.8	0	0	0
ENSMUSG00000025932	EYA1	EYA transcriptional coactivator and phosphatase 1	nucleus|cytoplasm|	establishment of mitotic spindle orientation|metanephros development|branching involved in ureteric bud morphogenesis|outflow tract morphogenesis|double-strand break repair|transcription, DNA-templated|pattern specification process|sensory perception of sound|anatomical structure morphogenesis|response to ionizing radiation|striated muscle tissue development|histone dephosphorylation|protein sumo…	RNA binding|protein tyrosine phosphatase activity|protein binding|metal ion binding|	9	-0.5	1.07	10	1.7	11.3	1.8	10.5	0.00594	0.7	3.4	0	0	0
ENSMUSG00000037965	ZC3H7A	zinc finger CCCH-type containing 7A	nucleus|	None	poly(A) RNA binding|metal ion binding|	9	1.5	6.11	9	2.2	5.06	1.5	10.5	0.00594	0.6	3.2	0	0	0
ENSMUSG00000003585	SEC14L2	SEC14-like 2 (S. cerevisiae)	nucleus|cytoplasm|integral component of membrane|	transcription, DNA-templated|transport|regulation of cholesterol biosynthetic process|positive regulation of transcription, DNA-templated|	transporter activity|phospholipid binding|vitamin E binding|	10	3.4	9.42	10	3.2	1.39	3.3	10.5	0.00594	1.8	6.5	0	0	0
ENSMUSG00000004637	WWOX	WW domain containing oxidoreductase	nucleus|cytoplasm|cytoplasm|mitochondrion|Golgi apparatus|cytosol|cytosol|plasma membrane|microvillus|	osteoblast differentiation|steroid metabolic process|Wnt signaling pathway|negative regulation of Wnt signaling pathway|positive regulation of transcription from RNA polymerase II promoter|skeletal system morphogenesis|oxidation-reduction process|cellular response to transforming growth factor beta stimulus|intrinsic apoptotic signaling pathway by p53 class mediator|extrinsic apoptotic signaling …	protein binding|oxidoreductase activity|oxidoreductase activity|enzyme binding|protein dimerization activity|cofactor binding|coenzyme binding|	10	0.8	2.48	10	4	10.7	1.9	10.5	0.00594	0.5	6.2	0	0	0
ENSMUSG00000021770	SAMD8	sterile alpha motif domain containing 8	integral component of membrane|integral component of endoplasmic reticulum membrane|	sphingomyelin biosynthetic process|ceramide biosynthetic process|regulation of ceramide biosynthetic process|	molecular_function|transferase activity|	10	2.4	13.6	10	-1.3	5.81	2.3	10.5	0.00594	1.3	5	0	0	0
ENSMUSG00000009927	RPS25	ribosomal protein S25	nucleus|nucleolus|cytoplasm|cytosol|ribosome|ribosome|small ribosomal subunit|cytosolic small ribosomal subunit|extracellular vesicular exosome|	ribosomal small subunit assembly|nuclear-transcribed mRNA catabolic process, nonsense-mediated decay|translation|translation|translation|translational initiation|translational elongation|translational termination|SRP-dependent cotranslational protein targeting to membrane|gene expression|viral process|RNA metabolic process|mRNA metabolic process|viral life cycle|viral transcription|cellular prote…	RNA binding|structural constituent of ribosome|protein binding|poly(A) RNA binding|	6	1.8	5.42	6	1.7	5.41	1.7	10.5	0.00594	0.8	3.4	0	0	0
ENSMUSG00000061845	GM10104	predicted gene 10104	cellular_component|extracellular region|	defense response|biological_process|defense response to bacterium|	molecular_function|	7	2.1	4.75	9	1.4	6.29	1.7	10.5	0.00594	0.6	3.2	0	0	0
ENSMUSG00000061787	RPS17	ribosomal protein S17	cytosol|ribosome|membrane|cytosolic small ribosomal subunit|cytosolic small ribosomal subunit|extracellular vesicular exosome|	ribosomal small subunit assembly|nuclear-transcribed mRNA catabolic process, nonsense-mediated decay|rRNA processing|translation|translation|translational initiation|translational initiation|translational elongation|translational elongation|translational termination|SRP-dependent cotranslational protein targeting to membrane|gene expression|viral process|RNA metabolic process|mRNA metabolic proce…	structural constituent of ribosome|poly(A) RNA binding|	1	0.7	0.543	4	1.7	10.5	1.6	10.5	0.00594	1	3	0	0	0
ENSMUSG00000033382	TRAPPC8	trafficking protein particle complex 8	Golgi apparatus|	vesicle-mediated transport|	protein binding|	8	1.3	2.39	6	1.7	8.81	1.6	10.5	0.00594	0.6	3.2	0	0	0
ENSMUSG00000067998	BPIFB9A	BPI fold containing family B, member 9A	cellular_component|	biological_process|	molecular_function|	10	2.3	10	10	1.9	0.841	2.3	10.5	0.00594	1	4.3	0	0	0
ENSMUSG00000001767	CRNKL1	crooked neck pre-mRNA splicing factor 1	spliceosomal complex|cytoplasm|nuclear speck|catalytic step 2 spliceosome|	spliceosomal complex assembly|mRNA splicing, via spliceosome|	RNA binding|protein binding|poly(A) RNA binding|	10	1	3.2	8	2.5	10.6	2.3	10.5	0.00594	0.9	4.3	0	0	0
ENSMUSG00000064168	HIST1H2BH	histone cluster 1, H2bh	nucleosome|nucleus|nucleoplasm|extracellular vesicular exosome|	chromatin organization|nucleosome assembly|	DNA binding|protein heterodimerization activity|	7	1.7	10.6	7	1.1	0.939	1.6	10.5	0.00594	0.7	3.3	0	0	0
ENSMUSG00000056076	EIF3B	eukaryotic translation initiation factor 3, subunit B	cytosol|eukaryotic translation initiation factor 3 complex|eukaryotic 43S preinitiation complex|eukaryotic 48S preinitiation complex|extracellular vesicular exosome|	formation of translation preinitiation complex|translation|translational initiation|translational initiation|translational initiation|regulation of translational initiation|gene expression|cellular protein metabolic process|	nucleotide binding|translation initiation factor activity|translation initiation factor activity|translation initiation factor activity|protein binding|translation initiation factor binding|protein complex scaffold|	2	0.9	1.72	6	1.5	9.52	1.4	10.5	0.00594	0.7	2.8	0	0	0
ENSMUSG00000051671	COA6	cytochrome c oxidase assembly factor 6 homolog (S. cerevisiae)	cellular_component|mitochondrion|	biological_process|hydrogen ion transmembrane transport|	molecular_function|cytochrome-c oxidase activity|poly(A) RNA binding|	8	1.6	8.82	8	1.1	2.15	1.5	10.5	0.00594	0.7	2.6	0	0	0
ENSMUSG00000041718	ALG13	ALG13, UDP-N-acetylglucosaminyltransferase subunit	endoplasmic reticulum membrane|	dolichol-linked oligosaccharide biosynthetic process|proteolysis|protein N-linked glycosylation via asparagine|lipid glycosylation|post-translational protein modification|cellular protein metabolic process|	N-acetylglucosaminyldiphosphodolichol N-acetylglucosaminyltransferase activity|cysteine-type peptidase activity|carbohydrate binding|poly(A) RNA binding|	10	-1.9	9.62	10	-0.9	2.66	-1.4	10.5	0.00594	-2.9	-0.4	0	0	0
ENSMUSG00000003039	FAM32A	family with sequence similarity 32, member A	nucleus|nucleolus|mitochondrion|intracellular membrane-bounded organelle|	apoptotic process|cell cycle|biological_process|	protein binding|poly(A) RNA binding|	10	1.5	8.17	9	3	3.84	1.5	10.5	0.00594	0.6	3.7	0	0	0
ENSMUSG00000003299	MRPL4	mitochondrial ribosomal protein L4	mitochondrion|ribosome|	translation|	structural constituent of ribosome|poly(A) RNA binding|	9	1.3	6.29	7	1.5	4.59	1.3	10.5	0.00594	0.5	2.6	0	0	0
ENSMUSG00000062981	MRPL42	mitochondrial ribosomal protein L42	mitochondrion|mitochondrial small ribosomal subunit|plasma membrane|	translation|	structural constituent of ribosome|poly(A) RNA binding|	8	1	4.28	9	1.3	6.88	1.1	10.5	0.00594	0.5	2.5	0	0	0
ENSMUSG00000002129	SF3A1	splicing factor 3a, subunit 1, 120kDa	nucleus|nucleoplasm|spliceosomal complex|U2-type spliceosomal complex|catalytic step 2 spliceosome|	mRNA 3'-splice site recognition|mRNA splicing, via spliceosome|mRNA splicing, via spliceosome|mRNA splicing, via spliceosome|mRNA processing|RNA splicing|gene expression|	RNA binding|protein binding|poly(A) RNA binding|	6	1.4	7.44	3	1.4	3.44	1.4	10.5	0.00594	0.7	2.7	0	0	0
ENSMUSG00000030733	SH2B1	SH2B adaptor protein 1	nucleus|cytosol|membrane|	cellular component movement|blood coagulation|lamellipodium assembly|intracellular signal transduction|positive regulation of mitosis|regulation of DNA biosynthetic process|	signal transducer activity|protein binding|	9	1	1.15	9	2.5	11.6	2.5	10.5	0.00594	0.7	4.5	0	0	0
ENSMUSG00000058762	BTNL6	butyrophilin-like 6	cellular_component|membrane|integral component of membrane|	biological_process|	molecular_function|	9	1.1	3.68	9	2.2	8.43	1.8	10.5	0.00594	0.7	3.7	0	0	0
ENSMUSG00000063511	SNRNP70	small nuclear ribonucleoprotein 70kDa (U1)	nucleus|nucleoplasm|spliceosomal complex|U1 snRNP|nuclear speck|	mRNA splicing, via spliceosome|mRNA splicing, via spliceosome|mRNA splicing, via spliceosome|mRNA processing|RNA splicing|gene expression|regulation of RNA splicing|	nucleotide binding|RNA binding|protein binding|poly(A) RNA binding|	10	0.8	1.61	8	2.4	10.8	2.3	10.4	0.00612	0.6	4.5	0	0	0
ENSMUSG00000036646	MAN1B1	mannosidase, alpha, class 1B, member 1	endoplasmic reticulum|endoplasmic reticulum membrane|membrane|integral component of membrane|endoplasmic reticulum quality control compartment|	protein folding|protein N-linked glycosylation|oligosaccharide metabolic process|protein N-linked glycosylation via asparagine|ER-associated ubiquitin-dependent protein catabolic process|post-translational protein modification|cellular protein metabolic process|	mannosyl-oligosaccharide 1,2-alpha-mannosidase activity|mannosyl-oligosaccharide 1,2-alpha-mannosidase activity|calcium ion binding|	10	3.4	13.5	9	0	0	2.2	10.4	0.00612	0.7	5.7	0	0	0
ENSMUSG00000019066	RAB3D	RAB3D, member RAS oncogene family	mitochondrion|plasma membrane|transport vesicle|zymogen granule|extracellular vesicular exosome|	GTP catabolic process|exocytosis|small GTPase mediated signal transduction|protein transport|regulation of exocytosis|peptidyl-cysteine methylation|	GTPase activity|GTP binding|GTPase binding|	8	2	3.86	10	2.4	7.22	2.2	10.4	0.00612	0.8	4.1	0	0	0
ENSMUSG00000021156	ZMYND11	zinc finger, MYND-type containing 11	nucleus|chromosome|	negative regulation of transcription from RNA polymerase II promoter|transcription, DNA-templated|cell cycle|cell proliferation|viral process|chromatin modification|regulation of transcription elongation from RNA polymerase II promoter|negative regulation of I-kappaB kinase/NF-kappaB signaling|negative regulation of JNK cascade|negative regulation of extrinsic apoptotic signaling pathway|	DNA binding|transcription corepressor activity|protein binding|zinc ion binding|methylated histone binding|	9	1.2	9.22	8	0.9	1.61	1.1	10.4	0.00612	0.5	2.2	0	0	0
ENSMUSG00000023949	TCTE1	t-complex-associated-testis-expressed 1	None	None	None	9	0.4	0.386	10	2.1	10.3	2.2	10.4	0.00612	0.7	3.8	0	0	0
ENSMUSG00000021945	ZMYM2	zinc finger, MYM-type 2	cytosol|PML body|	transcription, DNA-templated|regulation of transcription, DNA-templated|biological_process|	zinc ion binding|ubiquitin conjugating enzyme binding|	10	1.3	2.36	10	1.3	8.37	1.3	10.4	0.00612	0.5	2.4	0	0	0
ENSMUSG00000067288	RPS28	ribosomal protein S28	cytoplasm|cytosol|small ribosomal subunit|cytosolic small ribosomal subunit|extracellular vesicular exosome|	nuclear-transcribed mRNA catabolic process, nonsense-mediated decay|rRNA processing|translation|translation|translational initiation|translational elongation|translational termination|SRP-dependent cotranslational protein targeting to membrane|gene expression|viral process|RNA metabolic process|mRNA metabolic process|viral life cycle|viral transcription|ribosomal small subunit biogenesis|cellular…	structural constituent of ribosome|poly(A) RNA binding|	4	2.4	11.5	3	0.5	0.66	2.3	10.4	0.00612	1.2	4.9	0	0	0
ENSMUSG00000030521	MPHOSPH10	M-phase phosphoprotein 10 (U3 small nucleolar ribonucleoprotein)	chromosome|nucleolus|small nucleolar ribonucleoprotein complex|	RNA splicing, via transesterification reactions|rRNA processing|RNA processing|RNA splicing|negative regulation of phosphatase activity|	protein binding|poly(A) RNA binding|	8	1.6	5.8	9	2.1	5.16	1.5	10.4	0.00612	0.5	3.2	0	0	0
ENSMUSG00000029426	SCARB2	scavenger receptor class B, member 2	lysosomal membrane|lysosomal membrane|membrane|integral component of membrane|lysosomal lumen|extracellular vesicular exosome|	protein targeting to lysosome|cell adhesion|	receptor activity|protein binding|enzyme binding|	9	2.4	5.74	9	1.9	5.2	2.3	10.4	0.00612	1	4.1	0	0	0
ENSMUSG00000062963	UFC1	ubiquitin-fold modifier conjugating enzyme 1	extracellular vesicular exosome|	response to endoplasmic reticulum stress|protein ufmylation|protein ufmylation|	protein binding|UFM1 conjugating enzyme activity|	10	1.7	6.42	7	1.4	4.52	1.5	10.4	0.00612	0.7	3.4	0	0	0
ENSMUSG00000019710	MRPL24	mitochondrial ribosomal protein L24	mitochondrion|ribosome|	translation|	structural constituent of ribosome|	10	2.3	10.2	9	0.5	0.905	2.2	10.4	0.00612	0.9	4	0	0	0
ENSMUSG00000038997	ASB17	ankyrin repeat and SOCS box containing 17	None	protein ubiquitination|intracellular signal transduction|	None	10	1.4	5.57	10	3.6	6.74	1.5	10.4	0.00612	0.8	4.8	0	0	0
ENSMUSG00000056486	CHN1	chimerin 1	cytosol|	small GTPase mediated signal transduction|motor neuron axon guidance|positive regulation of signal transduction|regulation of Rac GTPase activity|positive regulation of GTPase activity|ephrin receptor signaling pathway|regulation of axonogenesis|regulation of small GTPase mediated signal transduction|	SH3/SH2 adaptor activity|GTPase activator activity|metal ion binding|ephrin receptor binding|	10	1.7	6.13	10	3.7	6.11	1.6	10.4	0.00612	0.6	4.7	0	0	0
ENSMUSG00000027952	PMVK	phosphomevalonate kinase	peroxisome|cytosol|cytosol|membrane|extracellular vesicular exosome|	cholesterol biosynthetic process|cholesterol biosynthetic process|sterol biosynthetic process|phosphorylation|isopentenyl diphosphate biosynthetic process, mevalonate pathway|small molecule metabolic process|response to cholesterol|	phosphomevalonate kinase activity|ATP binding|	8	1.5	5.08	7	1.7	5.7	1.6	10.3	0.00631	0.6	3.1	0	0	0
ENSMUSG00000058290	ESPL1	extra spindle pole bodies homolog 1 (S. cerevisiae)	nucleus|centrosome|cytosol|	mitotic sister chromatid segregation|meiotic spindle organization|mitotic cell cycle|cytokinesis|proteolysis|apoptotic process|establishment of mitotic spindle localization|homologous chromosome segregation|positive regulation of mitotic metaphase/anaphase transition|negative regulation of sister chromatid cohesion|	catalytic activity|protein binding|cysteine-type peptidase activity|cysteine-type peptidase activity|	6	1.8	7.09	2	2.9	5.32	2.3	10.3	0.00631	1.2	4.7	0	0	0
ENSMUSG00000063887	NLGN1	neuroligin 1	integral component of plasma membrane|integral component of plasma membrane|external side of plasma membrane|cell surface|cell surface|N-methyl-D-aspartate selective glutamate receptor complex|cell junction|dendrite|filopodium tip|synapse|synapse|postsynaptic membrane|neuronal postsynaptic density|	regulation of respiratory gaseous exchange by neurological system process|protein targeting|heterophilic cell-cell adhesion|neuron cell-cell adhesion|neuron cell-cell adhesion|nervous system development|synapse assembly|synapse assembly|synaptic vesicle targeting|calcium-dependent cell-cell adhesion|neuronal signal transduction|positive regulation of synaptic transmission, GABAergic|protein local…	receptor activity|receptor activity|PDZ domain binding|neurexin family protein binding|neurexin family protein binding|protein dimerization activity|cell adhesion molecule binding|	8	1.3	3.16	10	2.8	10	2.7	10.3	0.00631	0.6	4.5	0	0	0
ENSMUSG00000051674	DCUN1D4	DCN1, defective in cullin neddylation 1, domain containing 4	nucleus|	biological_process|	molecular_function|protein binding|	10	2	8.23	9	1.2	3.73	1.7	10.3	0.00631	0.7	3.5	0	0	0
ENSMUSG00000020994	PNN	pinin, desmosome associated protein	nucleus|cytoplasm|intermediate filament|plasma membrane|cell-cell junction|membrane|nuclear speck|desmosome|exon-exon junction complex|catalytic step 2 spliceosome|	mRNA splicing, via spliceosome|transcription, DNA-templated|regulation of transcription, DNA-templated|cell adhesion|	DNA binding|structural molecule activity|poly(A) RNA binding|	10	1.5	8.5	7	1.1	2.96	1.4	10.3	0.00631	0.5	3	0	0	0
ENSMUSG00000042351	GRAP2	GRB2-related adaptor protein 2	nucleus|cytoplasm|endosome|cytosol|	Ras protein signal transduction|cell-cell signaling|positive regulation of signal transduction|T cell costimulation|Fc-epsilon receptor signaling pathway|innate immune response|T cell receptor signaling pathway|	SH3/SH2 adaptor activity|protein binding|	10	2.1	4.67	10	1.2	7.43	1.3	10.3	0.00631	0.6	2.8	0	0	0
ENSMUSG00000091230	GM6970	histone cluster 1, H1b pseudogene	None	None	None	8	-1.6	1.33	9	-1.6	9.26	-1.6	10.3	0.00631	-3.2	-0.6	0	0	0
ENSMUSG00000026867	GAPVD1	GTPase activating protein and VPS9 domains 1	endosome|cytosol|membrane|	endocytosis|signal transduction|positive regulation of GTPase activity|positive regulation of GTPase activity|regulation of small GTPase mediated signal transduction|regulation of protein transport|	guanyl-nucleotide exchange factor activity|GTPase activator activity|GTPase activating protein binding|	9	-1.4	7.67	9	-1	3.25	-1.2	10.3	0.00631	-2.6	-0.4	0	0	0
ENSMUSG00000027305	NDUFAF1	NADH dehydrogenase (ubiquinone) complex I, assembly factor 1	cytoplasm|mitochondrial respiratory chain complex I|	mitochondrial electron transport, NADH to ubiquinone|protein complex assembly|	protein binding|unfolded protein binding|	9	1.3	3.45	10	1.6	7.46	1.5	10.3	0.00631	0.5	2.8	0	0	0
ENSMUSG00000000278	SCPEP1	serine carboxypeptidase 1	cytosol|extracellular vesicular exosome|	proteolysis|retinoic acid metabolic process|negative regulation of blood pressure|positive regulation of vasodilation|	serine-type carboxypeptidase activity|	8	2	6.27	9	3.4	5.87	1.8	10.3	0.00631	0.6	5	0	0	0
ENSMUSG00000070407	HS3ST3B1	heparan sulfate (glucosamine) 3-O-sulfotransferase 3B1	Golgi membrane|integral component of plasma membrane|	carbohydrate metabolic process|glycosaminoglycan biosynthetic process|heparan sulfate proteoglycan biosynthetic process|heparan sulfate proteoglycan biosynthetic process, enzymatic modification|glycosaminoglycan metabolic process|small molecule metabolic process|	[heparan sulfate]-glucosamine 3-sulfotransferase 1 activity|[heparan sulfate]-glucosamine 3-sulfotransferase 3 activity|	7	2.5	2.48	9	2	8.5	2.1	10.3	0.00631	0.9	4.1	0	0	0
ENSMUSG00000041133	SMC1A	structural maintenance of chromosomes 1A	chromosome, centromeric region|kinetochore|condensed chromosome kinetochore|condensed nuclear chromosome|nucleus|nucleoplasm|chromosome|cytoplasm|cytosol|cohesin core heterodimer|meiotic cohesin complex|	mitotic sister chromatid segregation|mitotic cell cycle|mRNA splicing, via spliceosome|DNA repair|mitotic spindle organization|sister chromatid cohesion|mitotic sister chromatid cohesion|mitotic cell cycle checkpoint|meiotic nuclear division|RNA splicing|response to radiation|gene expression|stem cell maintenance|negative regulation of DNA endoreduplication|signal transduction in response to DNA …	chromatin binding|microtubule motor activity|protein binding|ATP binding|mediator complex binding|poly(A) RNA binding|protein heterodimerization activity|	5	1.7	2.26	4	1.6	8.36	1.7	10.3	0.00631	0.7	3.5	0	0	0
ENSMUSG00000079299	KLRB1	killer cell lectin-like receptor subfamily B, member 1	plasma membrane|integral component of membrane|	cell surface receptor signaling pathway|	transmembrane signaling receptor activity|carbohydrate binding|	10	-0.3	0.283	9	4.2	13.5	4.2	10.3	0.00631	2.2	8	0	0	0
ENSMUSG00000029711	EPO	erythropoietin	extracellular region|extracellular space|cell surface|	apoptotic process|signal transduction|embryo implantation|aging|blood circulation|positive regulation of cell proliferation|response to salt stress|negative regulation of calcium ion transport into cytosol|peptidyl-serine phosphorylation|response to lipopolysaccharide|response to vitamin A|response to testosterone|positive regulation of tyrosine phosphorylation of Stat5 protein|hemoglobin biosynt…	erythropoietin receptor binding|hormone activity|protein binding|protein kinase activator activity|	10	1.3	8.51	10	0.7	2.26	1.3	10.3	0.00631	0.5	2.8	0	0	0
ENSMUSG00000025203	SCD2	stearoyl-Coenzyme A desaturase 2	endoplasmic reticulum|membrane|integral component of membrane|	lipid metabolic process|fatty acid metabolic process|fatty acid biosynthetic process|oxidation-reduction process|	stearoyl-CoA 9-desaturase activity|iron ion binding|oxidoreductase activity|oxidoreductase activity, acting on paired donors, with oxidation of a pair of donors resulting in the reduction of molecular oxygen to two molecules of water|	4	2	8.79	3	1.1	2.53	1.6	10.3	0.00631	0.8	3.7	0	0	0
ENSMUSG00000032244	FEM1B	fem-1 homolog b (C. elegans)	nucleus|cytoplasm|	apoptotic process|protein ubiquitination|regulation of ubiquitin-protein transferase activity|branching involved in prostate gland morphogenesis|epithelial cell maturation involved in prostate gland development|regulation of extrinsic apoptotic signaling pathway via death domain receptors|regulation of DNA damage checkpoint|	ubiquitin-protein transferase activity|death receptor binding|death receptor binding|protein binding|	10	1.6	1	10	1.6	9.54	1.6	10.3	0.00631	0.7	2.8	0	0	0
ENSMUSG00000031931	ANKRD49	ankyrin repeat domain 49	nucleus|	positive regulation of transcription, DNA-templated|	None	10	1.5	1.88	10	2.1	9.5	2	10.3	0.00631	0.9	3.9	0	0	0
ENSMUSG00000019320	NOXO1	NADPH oxidase organizer 1	NADPH oxidase complex|	superoxide metabolic process|regulation of hydrogen peroxide metabolic process|extracellular matrix disassembly|positive regulation of catalytic activity|positive regulation of catalytic activity|regulation of respiratory burst|	protein binding|phospholipid binding|superoxide-generating NADPH oxidase activator activity|enzyme binding|phosphatidylinositol binding|identical protein binding|	10	1.3	5.81	10	1.4	4.79	1.3	10.2	0.0065	0.6	2.8	0	0	0
ENSMUSG00000026697	MYOC	myocilin, trabecular meshwork inducible glucocorticoid response	proteinaceous extracellular matrix|extracellular space|mitochondrial outer membrane|mitochondrial inner membrane|mitochondrial intermembrane space|endoplasmic reticulum|rough endoplasmic reticulum|Golgi apparatus|cilium|cytoplasmic membrane-bounded vesicle|extracellular matrix|cytoplasmic vesicle|node of Ranvier|extracellular vesicular exosome|	osteoblast differentiation|negative regulation of cell-matrix adhesion|positive regulation of phosphatidylinositol 3-kinase signaling|skeletal muscle hypertrophy|myelination in peripheral nervous system|positive regulation of cell migration|neuron projection development|negative regulation of Rho protein signal transduction|non-canonical Wnt signaling pathway via JNK cascade|ERBB2-ERBB3 signaling…	fibronectin binding|frizzled binding|protein binding|myosin light chain binding|	8	2	8.46	10	2.2	2.15	2	10.2	0.0065	1	4	0	0	0
ENSMUSG00000029447	CCT6A	chaperonin containing TCP1, subunit 6A (zeta 1)	acrosomal vesicle|zona pellucida receptor complex|cytoplasm|cytosol|chaperonin-containing T-complex|microtubule|cell body|extracellular vesicular exosome|	protein folding|binding of sperm to zona pellucida|cellular protein metabolic process|'de novo' posttranslational protein folding|	ATP binding|poly(A) RNA binding|unfolded protein binding|	4	1.8	6.21	7	2.9	5.32	2.4	10.2	0.0065	0.7	4.8	0	0	0
ENSMUSG00000050730	ARHGAP42	Rho GTPase activating protein 42	intracellular|	signal transduction|positive regulation of GTPase activity|	GTPase activator activity|	10	1.2	5.18	9	1.8	5.76	1.6	10.2	0.0065	0.7	3.4	0	0	0
ENSMUSG00000022545	ERCC4	excision repair cross-complementation group 4	nucleotide-excision repair complex|nucleotide-excision repair factor 1 complex|chromosome, telomeric region|nuclear chromosome, telomeric region|nucleus|nucleoplasm|transcription factor TFIID complex|	resolution of meiotic recombination intermediates|nucleotide-excision repair, DNA damage removal|telomere maintenance|double-strand break repair via homologous recombination|DNA catabolic process, endonucleolytic|DNA catabolic process, endonucleolytic|DNA repair|DNA repair|transcription-coupled nucleotide-excision repair|nucleotide-excision repair|nucleotide-excision repair|nucleotide-excision re…	single-stranded DNA endodeoxyribonuclease activity|TFIID-class transcription factor binding|damaged DNA binding|single-stranded DNA binding|endodeoxyribonuclease activity|endodeoxyribonuclease activity|protein binding|protein C-terminus binding|structure-specific DNA binding|protein N-terminus binding|	9	2.5	1.14	10	1.8	9.89	1.9	10.2	0.0065	0.7	3.6	0	0	0
ENSMUSG00000004364	CUL3	cullin 3	Golgi membrane|nucleus|polar microtubule|membrane|Cul3-RING ubiquitin ligase complex|extracellular vesicular exosome|	G1/S transition of mitotic cell cycle|mitotic anaphase|protein polyubiquitination|cytokinesis|trophectodermal cellular morphogenesis|protein monoubiquitination|ER to Golgi vesicle-mediated transport|cell cycle arrest|integrin-mediated signaling pathway|gastrulation|cyclin catabolic process|positive regulation of cell proliferation|Wnt signaling pathway|cell migration|protein ubiquitination|stem c…	ubiquitin-protein transferase activity|protein binding|cyclin binding|POZ domain binding|ubiquitin protein ligase binding|	10	0.7	2.57	10	1.3	9.05	1	10.2	0.0065	0.3	3.4	0	0	0
ENSMUSG00000024787	SNX15	sorting nexin 15	nucleolus|cytoplasm|cytosol|membrane|cytoplasmic vesicle membrane|	intracellular protein transport|	phosphatidylinositol binding|	10	2.1	12.4	9	-0.9	1.3	1.9	10.2	0.0065	0.6	3.6	0	0	0
ENSMUSG00000003778	BRD8	bromodomain containing 8	Swr1 complex|nucleus|nucleus|nucleoplasm|mitochondrion|NuA4 histone acetyltransferase complex|	chromatin organization|transcription, DNA-templated|regulation of transcription, DNA-templated|regulation of transcription from RNA polymerase II promoter|signal transduction|cell surface receptor signaling pathway|intracellular receptor signaling pathway|regulation of growth|histone H4 acetylation|histone H2A acetylation|	sequence-specific DNA binding transcription factor activity|thyroid hormone receptor activity|	9	1.2	1.96	10	1.5	8.7	1.3	10.2	0.0065	0.5	3.2	0	0	0
ENSMUSG00000033177	TMPRSS7	transmembrane protease, serine 7	plasma membrane|integral component of membrane|	proteolysis|	serine-type endopeptidase activity|serine-type peptidase activity|	8	1	3.82	9	2	8.44	1.3	10.2	0.0065	0.6	3.3	0	0	0
ENSMUSG00000032440	TGFBR2	transforming growth factor, beta receptor II (70/80kDa)	cytosol|plasma membrane|caveola|external side of plasma membrane|integral component of membrane|receptor complex|transforming growth factor beta receptor homodimeric complex|	blood vessel development|patterning of blood vessels|vasculogenesis|in utero embryonic development|positive regulation of mesenchymal cell proliferation|lens development in camera-type eye|positive regulation of tolerance induction to self antigen|positive regulation of B cell tolerance induction|positive regulation of T cell tolerance induction|protein phosphorylation|receptor-mediated endocytos…	transmembrane receptor protein serine/threonine kinase activity|receptor signaling protein serine/threonine kinase activity|transforming growth factor beta-activated receptor activity|transforming growth factor beta-activated receptor activity|transforming growth factor beta-activated receptor activity|transforming growth factor beta receptor activity, type II|protein binding|protein binding|ATP …	8	2.1	3.82	9	2.4	6.89	2.3	10.2	0.0065	0.7	4.1	0	0	0
ENSMUSG00000044847	LSM11	LSM11, U7 small nuclear RNA associated	nucleus|nucleoplasm|U7 snRNP|U7 snRNP|histone pre-mRNA 3'end processing complex|	mitotic S phase|transcription from RNA polymerase II promoter|termination of RNA polymerase II transcription|histone mRNA 3'-end processing|histone mRNA metabolic process|gene expression|mRNA 3'-end processing|	protein binding|U7 snRNA binding|	7	2.3	4.96	10	2.3	5.61	2.3	10.2	0.0065	0.7	4	0	0	0
ENSMUSG00000037361	0610009D07RIK	N/A	None	None	None	6	2	8.43	9	2	2.08	2	10.2	0.0065	0.7	4	0	0	0
ENSMUSG00000074248	4930432M17RIK	RIKEN cDNA 4930432M17 gene	cellular_component|	biological_process|	molecular_function|	9	1.4	2.89	9	1.6	7.76	1.4	10.2	0.0065	0.7	2.5	0	0	0
ENSMUSG00000069302	HIST1H2AH	histone cluster 1, H2ah	nucleosome|nucleus|extracellular vesicular exosome|	nucleosome assembly|biological_process|	molecular_function|DNA binding|protein heterodimerization activity|	2	0	0	4	2.3	11.5	2.1	10.2	0.0065	1.4	4.8	0	0	0
ENSMUSG00000079577	GM14692	predicted gene 14692	cellular_component|	biological_process|	molecular_function|	7	2.4	7.95	8	2	2.7	2.4	10.2	0.0065	0.8	4.2	0	0	0
ENSMUSG00000068101	CENPM	centromere protein M	condensed chromosome kinetochore|nucleus|cytosol|	mitotic cell cycle|	None	7	2.5	9.08	6	1.3	1.95	1.7	10.2	0.0065	0.8	4	0	0	0
ENSMUSG00000079396	GM3411	predicted gene 3411	cellular_component|	biological_process|	molecular_function|	8	1.9	9.4	6	0.9	2.92	1.1	10.2	0.0065	0.5	3	0	0	0
ENSMUSG00000070972	DNAJC25	DnaJ (Hsp40) homolog, subfamily C , member 25	integral component of membrane|	None	None	6	2.1	6.06	7	2.1	4.48	2.1	10.2	0.0065	1	4.3	0	0	0
ENSMUSG00000001576	ERGIC1	endoplasmic reticulum-golgi intermediate compartment (ERGIC) 1	Golgi membrane|endoplasmic reticulum membrane|endoplasmic reticulum-Golgi intermediate compartment|membrane|integral component of membrane|endoplasmic reticulum-Golgi intermediate compartment membrane|	ER to Golgi vesicle-mediated transport|	protein binding|	9	2.5	9.41	10	1.8	1.87	2.4	10.2	0.0065	1.3	4.4	0	0	0
ENSMUSG00000025512	CHID1	chitinase domain containing 1	extracellular space|nucleus|lysosome|late endosome|trans-Golgi network|membrane|extracellular vesicular exosome|	carbohydrate metabolic process|chitin catabolic process|innate immune response|negative regulation of cytokine production involved in inflammatory response|	chitinase activity|protein binding|oligosaccharide binding|	8	1.3	0.882	10	1.5	9.55	1.4	10.1	0.00674	0.6	2.8	0	0	0
ENSMUSG00000039191	RBPJ	recombination signal binding protein for immunoglobulin kappa J region	MAML1-RBP-Jkappa- ICN1 complex|nucleus|nucleoplasm|transcription factor complex|nucleolus|cytoplasm|	negative regulation of transcription from RNA polymerase II promoter|negative regulation of transcription from RNA polymerase II promoter|angiogenesis|epithelial to mesenchymal transition|blood vessel remodeling|inflammatory response to antigenic stimulus|outflow tract morphogenesis|endocardium morphogenesis|epithelial to mesenchymal transition involved in endocardial cushion formation|cardiac le…	recombinase activity|RNA polymerase II core promoter proximal region sequence-specific DNA binding|RNA polymerase II core promoter sequence-specific DNA binding|RNA polymerase II core promoter proximal region sequence-specific DNA binding transcription factor activity involved in positive regulation of transcription|RNA polymerase II repressing transcription factor binding|DNA binding|chromatin b…	10	-2.4	7.12	10	-1.2	4.42	-1.4	10.1	0.00674	-3.7	-0.5	0	0	0
ENSMUSG00000025224	GBF1	golgi brefeldin A resistant guanine nucleotide exchange factor 1	Golgi membrane|mitochondrion|peroxisome|endoplasmic reticulum lumen|Golgi apparatus|Golgi stack|cis-Golgi network|trans-Golgi network|membrane|	retrograde vesicle-mediated transport, Golgi to ER|post-Golgi vesicle-mediated transport|viral process|vesicle-mediated transport|regulation of ARF protein signal transduction|positive regulation of GTPase activity|positive regulation of GTPase activity|COPI coating of Golgi vesicle|membrane organization|	ARF guanyl-nucleotide exchange factor activity|protein binding|	7	2.1	2.55	8	1.8	7.97	1.9	10.1	0.00674	0.8	3.5	0	0	0
ENSMUSG00000040479	DGKZ	diacylglycerol kinase, zeta	nucleus|cytoplasm|plasma membrane|lamellipodium|	protein kinase C-activating G-protein coupled receptor signaling pathway|blood coagulation|phosphorylation|phosphorylation|cell migration|platelet activation|mitotic G1 DNA damage checkpoint|intracellular signal transduction|negative regulation of catalytic activity|negative regulation of mitotic cell cycle|negative regulation of Ras protein signal transduction|lipid phosphorylation|	lipid kinase activity|NAD+ kinase activity|diacylglycerol kinase activity|diacylglycerol kinase activity|enzyme inhibitor activity|protein binding|ATP binding|protein C-terminus binding|metal ion binding|	10	-1.3	7.31	9	-1.2	3.14	-1.3	10.1	0.00674	-2.3	-0.4	0	0	0
ENSMUSG00000034893	COG3	component of oligomeric golgi complex 3	nucleus|cytoplasm|Golgi apparatus|cis-Golgi network|plasma membrane|Golgi transport complex|Golgi cisterna membrane|	protein glycosylation|intracellular protein transport|ER to Golgi vesicle-mediated transport|retrograde vesicle-mediated transport, Golgi to ER|intra-Golgi vesicle-mediated transport|protein localization to organelle|protein stabilization|	protein binding|protein transporter activity|	6	1.6	7.86	6	1	3.38	1.4	10.1	0.00674	0.5	2.6	0	0	0
ENSMUSG00000058709	EGLN2	egl-9 family hypoxia-inducible factor 2	nucleus|nucleoplasm|cytosol|	regulation of cell growth|response to hypoxia|peptidyl-proline hydroxylation to 4-hydroxy-L-proline|intracellular estrogen receptor signaling pathway|regulation of neuron apoptotic process|cell redox homeostasis|positive regulation of protein catabolic process|oxidation-reduction process|regulation of transcription from RNA polymerase II promoter in response to hypoxia|cellular response to hypoxi…	protein binding|ferrous iron binding|oxidoreductase activity, acting on paired donors, with incorporation or reduction of molecular oxygen, 2-oxoglutarate as one donor, and incorporation of one atom each of oxygen into both donors|oxygen sensor activity|L-ascorbic acid binding|peptidyl-proline 4-dioxygenase activity|	10	2	9.1	9	1.2	2.09	1.8	10.1	0.00674	0.7	3.6	0	0	0
ENSMUSG00000032028	NXPE2	neurexophilin and PC-esterase domain family, member 2	integral component of membrane|	None	None	10	2	8.78	10	1.5	1.97	2	10.1	0.00674	0.7	3.5	0	0	0
ENSMUSG00000014905	DNAJB9	DnaJ (Hsp40) homolog, subfamily B, member 9	nucleolus|cytoplasm|endoplasmic reticulum|endoplasmic reticulum lumen|endoplasmic reticulum membrane|extracellular vesicular exosome|	activation of signaling protein activity involved in unfolded protein response|ER-associated ubiquitin-dependent protein catabolic process|endoplasmic reticulum unfolded protein response|cellular protein metabolic process|	protein binding|misfolded protein binding|	9	1.8	7.14	6	1.3	3.63	1.4	10.1	0.00674	0.5	3.5	0	0	0
ENSMUSG00000022136	DNAJC3	DnaJ (Hsp40) homolog, subfamily C, member 3	cytoplasm|endoplasmic reticulum lumen|membrane|endoplasmic reticulum Sec complex|extracellular vesicular exosome|	negative regulation of protein kinase activity|activation of signaling protein activity involved in unfolded protein response|endoplasmic reticulum unfolded protein response|cellular protein metabolic process|proteolysis involved in cellular protein catabolic process|defense response to virus|	protein kinase inhibitor activity|chaperone binding|misfolded protein binding|	6	1.6	4.31	9	1.5	6.23	1.5	10.1	0.00674	0.5	3.4	0	0	0
ENSMUSG00000031029	EIF3F	eukaryotic translation initiation factor 3, subunit F	cytosol|eukaryotic translation initiation factor 3 complex|eukaryotic translation initiation factor 3 complex|membrane|eukaryotic 43S preinitiation complex|eukaryotic 48S preinitiation complex|	formation of translation preinitiation complex|translation|translational initiation|translational initiation|translational initiation|regulation of translational initiation|proteolysis|gene expression|protein deubiquitination|cellular protein metabolic process|	translation initiation factor activity|translation initiation factor activity|translation initiation factor activity|ubiquitin-specific protease activity|protein binding|	5	2.2	5.56	4	2.3	4.96	2.2	10.1	0.00674	0.9	4.4	0	0	0
ENSMUSG00000072423	PSMB11	proteasome (prosome, macropain) subunit, beta type, 11	nucleus|cytosol|proteasome core complex|	protein polyubiquitination|mitotic cell cycle|antigen processing and presentation of peptide antigen via MHC class I|antigen processing and presentation of exogenous peptide antigen via MHC class I, TAP-dependent|regulation of cellular amino acid metabolic process|apoptotic process|DNA damage response, signal transduction by p53 class mediator resulting in cell cycle arrest|gene expression|viral …	threonine-type endopeptidase activity|	10	2.3	10.8	9	0.9	1.11	2.1	10.1	0.00674	0.7	3.8	0	0	0
ENSMUSG00000020413	HUS1	HUS1 checkpoint homolog (S. pombe)	nucleus|nucleoplasm|nucleolus|cytoplasm|checkpoint clamp complex|	DNA damage checkpoint|double-strand break repair via homologous recombination|regulation of protein phosphorylation|DNA replication|DNA repair|protein phosphorylation|cellular response to DNA damage stimulus|mitotic cell cycle checkpoint|negative regulation of DNA replication|response to UV|embryo development|cellular response to ionizing radiation|	protein binding|	9	1.4	10.3	8	0.9	0.378	1.3	10.1	0.00674	0.6	2.5	0	0	0
ENSMUSG00000029145	EIF2B4	eukaryotic translation initiation factor 2B, subunit 4 delta, 67kDa	cytoplasm|cytosol|eukaryotic translation initiation factor 2B complex|	ovarian follicle development|translation|translational initiation|translational initiation|regulation of translation|regulation of translational initiation|response to heat|response to heat|response to glucose|gene expression|oligodendrocyte development|negative regulation of translational initiation in response to stress|myelination|response to peptide hormone|positive regulation of GTPase activ…	translation initiation factor activity|guanyl-nucleotide exchange factor activity|guanyl-nucleotide exchange factor activity|protein binding|translation initiation factor binding|	6	1.8	4.79	3	1.4	5.77	1.6	10.1	0.00674	0.7	3.5	0	0	0
ENSMUSG00000031754	NUDT21	nudix (nucleoside diphosphate linked moiety X)-type motif 21	nucleus|nucleoplasm|centrosome|mRNA cleavage factor complex|paraspeckles|	mRNA splicing, via spliceosome|transcription from RNA polymerase II promoter|termination of RNA polymerase II transcription|mRNA polyadenylation|mRNA processing|RNA splicing|gene expression|mRNA 3'-end processing|protein tetramerization|	RNA binding|mRNA binding|protein binding|hydrolase activity|AU-rich element binding|protein homodimerization activity|histone deacetylase binding|poly(A) RNA binding|	9	0.5	1.19	8	1.8	10.7	1.7	10.1	0.00674	0.6	3.2	0	0	0
ENSMUSG00000090602	GM5611	nucleophosmin 1 pseudogene	None	None	None	10	0.6	1.13	10	3.3	12.3	3.2	10.1	0.00674	0.9	5.7	0	0	0
ENSMUSG00000040424	HIPK4	homeodomain interacting protein kinase 4	cytoplasm|	protein phosphorylation|	protein serine/threonine kinase activity|ATP binding|	10	2.1	12.9	10	-1	3.61	2.1	10.1	0.00674	1.1	3.9	0	0	0
ENSMUSG00000020908	MYH3	myosin, heavy chain 3, skeletal muscle, embryonic	cytosol|muscle myosin complex|sarcomere|myosin filament|extracellular vesicular exosome|	skeletal muscle contraction|ATP catabolic process|muscle organ development|actin filament-based movement|muscle filament sliding|embryonic limb morphogenesis|sarcomere organization|face morphogenesis|	microfilament motor activity|microfilament motor activity|calmodulin binding|ATP binding|ATPase activity, coupled|actin filament binding|	10	1.3	2.22	9	1.8	8.19	1.8	10.1	0.00674	0.5	3.3	0	0	0
ENSMUSG00000060639	HIST1H4I	histone cluster 1, H4i	None	None	None	9	1.2	7.52	8	2.3	4.07	1.9	10.1	0.00674	0.7	3.4	0	0	0
ENSMUSG00000028447	DCTN3	dynactin 3 (p22)	condensed chromosome kinetochore|centrosome|spindle|cytosol|dynactin complex|midbody|cleavage furrow|perinuclear region of cytoplasm|	G2/M transition of mitotic cell cycle|mitotic cell cycle|cytokinesis|microtubule-based process|mitotic nuclear division|antigen processing and presentation of exogenous peptide antigen via MHC class II|	structural molecule activity|protein binding|	10	1.3	4.33	9	2.3	7.23	1.8	10.1	0.00674	0.7	3.2	0	0	0
ENSMUSG00000022034	ESCO2	establishment of sister chromatid cohesion N-acetyltransferase 2	chromatin|nucleus|nucleoplasm|Golgi apparatus|	mitotic cell cycle|regulation of DNA replication|post-translational protein acetylation|	transferase activity, transferring acyl groups|metal ion binding|	9	1.2	6.79	9	2.3	4.03	1.2	10.1	0.00674	0.4	3.4	0	0	0
ENSMUSG00000024410	3110002H16RIK	RIKEN cDNA 3110002H16 gene	lysosomal membrane|	None	None	9	-0.1	0.0805	8	-2.6	13.1	-2.4	10.1	0.00674	-4.9	-0.9	0	0	0
ENSMUSG00000028030	TBCK	TBC1 domain containing kinase	None	protein phosphorylation|positive regulation of Rab GTPase activity|	protein kinase activity|Rab GTPase activator activity|ATP binding|	10	-1.8	12	10	0	0	-1.7	10.1	0.00674	-3.3	-0.5	0	0	0
ENSMUSG00000022201	ZFR	zinc finger RNA binding protein	nucleus|chromosome|cytoplasm|	multicellular organismal development|	DNA binding|protein binding|zinc ion binding|poly(A) RNA binding|	10	1.3	5.41	10	2.7	6.67	1.5	10.1	0.00674	0.5	3.9	0	0	0
ENSMUSG00000094947	GM3944	predicted gene 3944	cellular_component|	biological_process|	molecular_function|	8	0.6	0.486	10	1.6	10.5	1.6	10.1	0.00674	0.7	2.6	0	0	0
ENSMUSG00000003228	GRK5	G protein-coupled receptor kinase 5	nucleus|cytoplasm|plasma membrane|	apoptotic process|adenylate cyclase-modulating G-protein coupled receptor signaling pathway|tachykinin receptor signaling pathway|regulation of G-protein coupled receptor protein signaling pathway|Wnt signaling pathway|termination of G-protein coupled receptor signaling pathway|negative regulation of apoptotic process|protein autophosphorylation|	protein serine/threonine kinase activity|G-protein coupled receptor kinase activity|protein kinase C binding|protein binding|ATP binding|phospholipid binding|	9	2	5.84	9	2.8	5.4	2	10.1	0.00674	0.6	4.2	0	0	0
ENSMUSG00000049396	GEMIN4	gem (nuclear organelle) associated protein 4	nucleoplasm|nucleolus|cytoplasm|cytosol|cytosol|membrane|small nuclear ribonucleoprotein complex|SMN complex|SMN-Sm protein complex|extracellular vesicular exosome|Gemini of coiled bodies|	spliceosomal snRNP assembly|spliceosomal snRNP assembly|rRNA processing|gene expression|RNA metabolic process|ncRNA metabolic process|	protein binding|	7	-1.5	2.86	10	1.4	8.45	1.5	10	0.00698	0.5	3	0	0	0
ENSMUSG00000070661	RNF186	ring finger protein 186	integral component of membrane|	None	zinc ion binding|	9	1.1	0.745	10	1.6	9.97	1.5	10	0.00698	0.5	2.9	0	0	0
ENSMUSG00000062328	RPL17	ribosomal protein L17	nucleus|cytosol|cytosolic large ribosomal subunit|	nuclear-transcribed mRNA catabolic process, nonsense-mediated decay|translation|translation|translational initiation|translational elongation|translational termination|SRP-dependent cotranslational protein targeting to membrane|gene expression|viral process|RNA metabolic process|mRNA metabolic process|viral life cycle|viral transcription|cellular protein metabolic process|	structural constituent of ribosome|poly(A) RNA binding|	4	2.2	9.84	1	0.9	0.934	2.2	10	0.00698	1	4.8	0	0	0
ENSMUSG00000074311	VMN1R139	vomeronasal 1 receptor 139	cellular_component|	biological_process|	molecular_function|	6	1.7	1.33	9	1.4	9.14	1.5	10	0.00698	0.6	3	0	0	0
ENSMUSG00000047675	RPS8	ribosomal protein S8	nucleus|cytoplasm|cytosol|membrane|cytosolic small ribosomal subunit|cytosolic small ribosomal subunit|ribonucleoprotein complex|extracellular vesicular exosome|	nuclear-transcribed mRNA catabolic process, nonsense-mediated decay|maturation of SSU-rRNA from tricistronic rRNA transcript (SSU-rRNA, 5.8S rRNA, LSU-rRNA)|translation|translation|translation|translational initiation|translational elongation|translational termination|SRP-dependent cotranslational protein targeting to membrane|gene expression|viral process|RNA metabolic process|mRNA metabolic pro…	structural constituent of ribosome|poly(A) RNA binding|	1	1.5	1.98	5	1.1	8.52	1.2	10	0.00698	0.6	2.8	0	0	0
ENSMUSG00000004069	DNAJA3	DnaJ (Hsp40) homolog, subfamily A, member 3	nucleus|nucleus|cytoplasm|mitochondrion|mitochondrial matrix|cytosol|cytosol|actin filament|IkappaB kinase complex|extrinsic component of plasma membrane|cell junction|neuromuscular junction|I-kappaB/NF-kappaB complex|mitochondrial nucleoid|intracellular membrane-bounded organelle|postsynaptic membrane|	negative regulation of transcription from RNA polymerase II promoter|mitochondrial DNA replication|protein folding|protein folding|negative regulation of protein kinase activity|activation of cysteine-type endopeptidase activity involved in apoptotic process|activation-induced cell death of T cells|small GTPase mediated signal transduction|neuromuscular junction development|cell aging|negative re…	small GTPase regulator activity|interferon-gamma receptor binding|protein binding|ATP binding|transcription factor binding|protein kinase binding|Hsp70 protein binding|receptor tyrosine kinase binding|metal ion binding|NF-kappaB binding|unfolded protein binding|	7	1.5	4.63	7	1.6	5.76	1.6	10	0.00698	0.6	3	0	0	0
ENSMUSG00000005615	PCYT1A	phosphate cytidylyltransferase 1, choline, alpha	endoplasmic reticulum membrane|endoplasmic reticulum membrane|cytosol|glycogen granule|	phospholipid metabolic process|phosphatidylcholine biosynthetic process|phosphatidylcholine biosynthetic process|CDP-choline pathway|small molecule metabolic process|glycerophospholipid biosynthetic process|	choline-phosphate cytidylyltransferase activity|lipid binding|protein homodimerization activity|	7	2	5.83	6	1.5	4.75	1.5	10	0.00698	0.7	3.3	0	0	0
ENSMUSG00000074322	VMN1R132	vomeronasal 1 receptor 132	cellular_component|	biological_process|	molecular_function|	6	1.7	1.33	9	1.4	9.14	1.5	10	0.00698	0.6	3	0	0	0
ENSMUSG00000068252	APOL7B	apolipoprotein L 7b	cellular_component|	None	None	10	1.6	6.07	9	1.1	4.74	1.4	10	0.00698	0.5	3.8	0	0	0
ENSMUSG00000028107	TARS2	threonyl-tRNA synthetase 2, mitochondrial (putative)	cellular_component|mitochondrial matrix|	tRNA aminoacylation for protein translation|gene expression|mitochondrial threonyl-tRNA aminoacylation|	molecular_function|threonine-tRNA ligase activity|ATP binding|	6	1.1	3.5	8	1.9	7.89	1.7	10	0.00698	0.5	3.3	0	0	0
ENSMUSG00000021779	THRB	thyroid hormone receptor, beta	nucleus|nucleoplasm|extracellular vesicular exosome|	negative regulation of transcription from RNA polymerase II promoter|transcription, DNA-templated|transcription initiation from RNA polymerase II promoter|sensory perception of sound|negative regulation of female receptivity|regulation of heart contraction|female courtship behavior|organ morphogenesis|gene expression|intracellular receptor signaling pathway|intracellular receptor signaling pathwa…	DNA binding|sequence-specific DNA binding transcription factor activity|steroid hormone receptor activity|transcription corepressor activity|thyroid hormone receptor activity|protein binding|zinc ion binding|enzyme binding|chromatin DNA binding|sequence-specific DNA binding|thyroid hormone binding|	10	1.9	7.59	10	3.4	4.59	1.9	10	0.00698	0.8	4.9	0	0	0
ENSMUSG00000060275	NRG2	neuregulin 2	extracellular region|plasma membrane|integral component of membrane|	signal transduction|epidermal growth factor receptor signaling pathway|fibroblast growth factor receptor signaling pathway|embryo development|Fc-epsilon receptor signaling pathway|innate immune response|neurotrophin TRK receptor signaling pathway|phosphatidylinositol-mediated signaling|	receptor binding|growth factor activity|	10	2.6	5.78	9	3.2	4.74	2.7	9.99	0.00701	0.9	4.8	0	0	0
ENSMUSG00000048498	CD300E	CD300e molecule	plasma membrane|integral component of membrane|extracellular vesicular exosome|	innate immune response|	None	10	-2	11.1	10	-0.6	2.23	-1.1	9.99	0.00701	-3.2	-0.4	0	0	0
ENSMUSG00000029575	MMAB	methylmalonic aciduria (cobalamin deficiency) cblB type	mitochondrial matrix|	vitamin metabolic process|water-soluble vitamin metabolic process|cobalamin metabolic process|cobalamin biosynthetic process|small molecule metabolic process|	ATP binding|cob(I)yrinic acid a,c-diamide adenosyltransferase activity|	9	-2.8	8.38	9	-1.2	4.27	-1.7	9.99	0.00701	-4.6	-0.7	0	0	0
ENSMUSG00000025393	ATP5B	ATP synthase, H+ transporting, mitochondrial F1 complex, beta polypeptide	nucleus|mitochondrion|mitochondrial proton-transporting ATP synthase complex|mitochondrial proton-transporting ATP synthase, catalytic core|mitochondrial matrix|mitochondrial matrix|plasma membrane|cell surface|membrane|mitochondrial membrane|mitochondrial nucleoid|extracellular vesicular exosome|	angiogenesis|osteoblast differentiation|generation of precursor metabolites and energy|ATP catabolic process|lipid metabolic process|ATP biosynthetic process|negative regulation of cell adhesion involved in substrate-bound cell migration|ATP hydrolysis coupled proton transport|proton transport|respiratory electron transport chain|mitochondrial ATP synthesis coupled proton transport|mitochondrial …	transporter activity|protein binding|ATP binding|ATPase activity|transmembrane transporter activity|MHC class I protein binding|proton-transporting ATP synthase activity, rotational mechanism|proton-transporting ATPase activity, rotational mechanism|	4	1.3	2.35	5	1.5	8	1.4	9.99	0.00701	0.7	2.8	0	0	0
ENSMUSG00000048826	DACT2	dishevelled-binding antagonist of beta-catenin 2	mitochondrion|	epithelial cell morphogenesis|negative regulation of cell adhesion|skin development|inner medullary collecting duct development|negative regulation of nodal signaling pathway|	protein kinase C binding|beta-catenin binding|transcription factor binding|protein kinase A binding|delta-catenin binding|	8	1.7	7.49	7	1.5	2.91	1.5	9.99	0.00701	0.5	3	0	0	0
ENSMUSG00000095893	OLFR884	olfactory receptor 884	plasma membrane|membrane|integral component of membrane|	signal transduction|G-protein coupled receptor signaling pathway|sensory perception of smell|response to stimulus|detection of chemical stimulus involved in sensory perception of smell|	signal transducer activity|G-protein coupled receptor activity|olfactory receptor activity|	10	2.4	4.07	10	1.3	7.22	1.4	9.98	0.00704	0.6	3.1	0	0	0
ENSMUSG00000052395	RFT1	RFT1 homolog (S. cerevisiae)	integral component of membrane|	dolichol-linked oligosaccharide biosynthetic process|lipid transport|carbohydrate transport|protein N-linked glycosylation via asparagine|post-translational protein modification|cellular protein metabolic process|	lipid transporter activity|	10	-0.5	1.29	8	3.1	13.3	3	9.97	0.00706	1.4	6.3	0	0	0
ENSMUSG00000095193	GM20939	predicted gene, 20939	None	None	metal ion binding|	9	0.8	2.48	9	4.2	11.9	4.1	9.97	0.00706	0.5	7.1	0	0	0
ENSMUSG00000048775	SERPINB13	serpin peptidase inhibitor, clade B (ovalbumin), member 13	extracellular region|extracellular space|cytoplasm|extracellular vesicular exosome|	response to UV|negative regulation of endopeptidase activity|regulation of proteolysis|regulation of proteolysis|	serine-type endopeptidase inhibitor activity|serine-type endopeptidase inhibitor activity|	10	1.6	6.78	10	3.5	5.39	1.7	9.96	0.00708	0.6	4.8	0	0	0
ENSMUSG00000045973	SLC25A51	solute carrier family 25, member 51	mitochondrial inner membrane|integral component of membrane|	transport|	None	9	1.3	0.828	10	1.4	9.45	1.4	9.96	0.00708	0.7	2.6	0	0	0
ENSMUSG00000079578	GM1140	predicted gene 1140	cellular_component|	biological_process|	molecular_function|	7	2.4	7.95	8	2	2.38	2.4	9.95	0.0071	0.8	4.3	0	0	0
ENSMUSG00000074030	EXOC8	exocyst complex component 8	exocyst|cytoplasm|plasma membrane|membrane|growth cone|	exocytosis|protein transport|cellular protein localization|cellular protein metabolic process|membrane organization|	protein binding|	9	1.9	9	10	1.3	1.81	1.8	9.95	0.0071	0.6	3	0	0	0
ENSMUSG00000074179	GM10639	predicted gene 10639	cellular_component|	biological_process|	molecular_function|	8	1.9	6.21	9	1.3	4.35	1.7	9.94	0.00713	0.5	3	0	0	0
ENSMUSG00000026511	SRP9	signal recognition particle 9kDa	signal recognition particle receptor complex|signal recognition particle, endoplasmic reticulum targeting|cytosol|extracellular vesicular exosome|	translation|SRP-dependent cotranslational protein targeting to membrane|gene expression|cellular protein metabolic process|negative regulation of translational elongation|	RNA binding|signal recognition particle binding|7S RNA binding|	9	2.5	12	8	-1.3	3.3	2.4	9.93	0.00715	1	4.6	0	0	0
ENSMUSG00000019689	1110001J03RIK	RIKEN cDNA 1110001J03 gene	mitochondrion|	biological_process|	molecular_function|	8	1.9	6.23	7	1.4	4.33	1.6	9.91	0.0072	0.6	3.2	0	0	0
ENSMUSG00000018548	TRIM37	tripartite motif containing 37	cytoplasm|peroxisome|cytosol|aggresome|perinuclear region of cytoplasm|	negative regulation of NF-kappaB transcription factor activity|negative regulation of centriole replication|positive regulation of sequence-specific DNA binding transcription factor activity|positive regulation of NF-kappaB transcription factor activity|protein autoubiquitination|aggresome assembly|	ubiquitin-protein transferase activity|tumor necrosis factor receptor binding|protein binding|zinc ion binding|ligase activity|ubiquitin protein ligase binding|protein homodimerization activity|	10	2.1	7.83	8	1.5	2.74	1.9	9.91	0.0072	0.6	3.5	0	0	0
ENSMUSG00000032199	POLR2M	polymerase (RNA) II (DNA directed) polypeptide M	nuclear envelope|DNA-directed RNA polymerase II, holoenzyme|neuronal cell body|	RNA biosynthetic process|maintenance of ER location|	DNA-directed RNA polymerase activity|	9	1.1	1.6	9	1.6	9.22	1.4	9.9	0.00721	0.7	2.6	0	0	0
ENSMUSG00000029500	PGAM5	phosphoglycerate mutase family member 5	mitochondrion|mitochondrial outer membrane|integral component of membrane|	dephosphorylation|dephosphorylation|positive regulation of GTPase activity|necroptotic process|	phosphoprotein phosphatase activity|GTPase activator activity|phosphatase activity|protein complex binding|	10	2	12.4	8	-1.2	2.21	1.9	9.9	0.00721	0.7	3.9	0	0	0
ENSMUSG00000035576	L3MBTL1	l(3)mbt-like 1 (Drosophila)	chromatin|condensed chromosome|nucleus|nucleoplasm|	transcription, DNA-templated|regulation of mitosis|chromatin modification|hemopoiesis|regulation of megakaryocyte differentiation|negative regulation of transcription, DNA-templated|negative regulation of transcription, DNA-templated|regulation of cell cycle|	chromatin binding|sequence-specific DNA binding transcription factor activity|protein binding|zinc ion binding|nucleosome binding|nucleosomal histone binding|SAM domain binding|methylated histone binding|methylated histone binding|histone binding|identical protein binding|	9	-0.6	0.544	9	2.4	10.5	2	9.9	0.00721	0.8	4	0	0	0
ENSMUSG00000005846	RSL1D1	ribosomal L1 domain containing 1	nucleolus|membrane|	osteoblast differentiation|regulation of protein localization|	poly(A) RNA binding|	8	3	11.9	8	0.6	1.47	2.4	9.9	0.00721	0.7	5	0	0	0
ENSMUSG00000038624	NEPN	nephrocan	interstitial matrix|extracellular space|extracellular matrix|	negative regulation of transcription from RNA polymerase II promoter|extracellular matrix organization|negative regulation of transforming growth factor beta receptor signaling pathway|	molecular_function|	9	1.8	9.84	9	-0.3	0.435	1.8	9.89	0.00724	0.6	3.3	0	0	0
ENSMUSG00000072613	1700049E17RIK2	tandem duplication of RIKEN cDNA 1700049E17 gene, gene 2	None	None	None	8	1.9	9.57	7	1.5	0.599	1.9	9.89	0.00724	0.8	3.6	0	0	0
ENSMUSG00000036019	TMTC2	transmembrane and tetratricopeptide repeat containing 2	endoplasmic reticulum|integral component of membrane|	None	None	10	2.9	5.95	9	-2.2	11.9	-1.2	9.89	0.00724	-5	1	0	0	0
ENSMUSG00000000600	KRIT1	KRIT1, ankyrin repeat containing	extracellular space|cytoplasm|microtubule|plasma membrane|cell-cell junction|	angiogenesis|negative regulation of endothelial cell proliferation|small GTPase mediated signal transduction|negative regulation of endothelial cell migration|negative regulation of angiogenesis|positive regulation of protein binding|cell redox homeostasis|regulation of catalytic activity|regulation of establishment of cell polarity|negative regulation of endothelial cell apoptotic process|	small GTPase regulator activity|protein binding|phosphatidylinositol-4,5-bisphosphate binding|microtubule binding|protein complex binding|	8	1.3	3.62	9	1.5	6.66	1.5	9.88	0.00726	0.7	3	0	0	0
ENSMUSG00000006313	UPK1A	uroplakin 1A	endoplasmic reticulum|plasma membrane|plasma membrane|integral component of membrane|apical plasma membrane|extracellular vesicular exosome|	epithelial cell differentiation|protein oligomerization|	protein homodimerization activity|monosaccharide binding|	9	1.8	3.91	9	1.4	6.9	1.5	9.88	0.00726	0.6	2.8	0	0	0
ENSMUSG00000028106	RPRD2	regulation of nuclear pre-mRNA domain containing 2	DNA-directed RNA polymerase II, holoenzyme|	None	None	9	1.4	9.49	9	0.7	1.25	1.2	9.86	0.0073	0.4	2.6	0	0	0
ENSMUSG00000041333	MUP4	major urinary protein 4	extracellular region|extracellular space|	transport|	transporter activity|protein binding|pheromone binding|small molecule binding|	10	1.3	5.9	10	1.9	4.84	1.4	9.86	0.0073	0.6	3	0	0	0
ENSMUSG00000027823	GMPS	guanine monphosphate synthase	cytoplasm|cytosol|	purine nucleobase metabolic process|GMP biosynthetic process|glutamine metabolic process|purine nucleobase biosynthetic process|purine ribonucleoside monophosphate biosynthetic process|small molecule metabolic process|nucleobase-containing small molecule metabolic process|	GMP synthase activity|GMP synthase (glutamine-hydrolyzing) activity|ATP binding|pyrophosphatase activity|	4	-0.5	0.355	6	1.8	11.8	1.8	9.86	0.0073	0.9	3.7	0	0	0
ENSMUSG00000032002	DCUN1D5	DCN1, defective in cullin neddylation 1, domain containing 5	cellular_component|	biological_process|	molecular_function|	9	2.9	10.9	10	1	2.35	2.2	9.86	0.0073	0.9	5	0	0	0
ENSMUSG00000033208	S100B	S100 calcium binding protein B	ruffle|extracellular region|extracellular space|nucleus|cytoplasm|cytoplasm|neuronal cell body|intracellular membrane-bounded organelle|perinuclear region of cytoplasm|	axonogenesis|central nervous system development|learning or memory|memory|cell proliferation|positive regulation of cell proliferation|regulation of cell shape|positive regulation of apoptotic process|positive regulation of I-kappaB kinase/NF-kappaB signaling|innate immune response|regulation of neuronal synaptic plasticity|astrocyte differentiation|response to glucocorticoid|response to methylme…	calcium ion binding|protein binding|zinc ion binding|identical protein binding|protein homodimerization activity|protein homodimerization activity|S100 protein binding|tau protein binding|calcium-dependent protein binding|RAGE receptor binding|	9	2.2	1.43	9	2.7	8.98	2.5	9.86	0.0073	0.6	4.4	0	0	0
ENSMUSG00000030983	BCCIP	BRCA2 and CDKN1A interacting protein	nucleus|nuclear cyclin-dependent protein kinase holoenzyme complex|	regulation of cyclin-dependent protein serine/threonine kinase activity|DNA repair|cell cycle|neuroendocrine cell differentiation|	protein binding|kinase regulator activity|poly(A) RNA binding|	5	1.7	3.44	6	1.6	6.79	1.6	9.86	0.0073	0.7	3.3	0	0	0
ENSMUSG00000025133	INTS4	integrator complex subunit 4	integrator complex|	snRNA processing|	protein binding|	7	2.1	7.33	8	3.6	5.09	3.1	9.85	0.00732	0.8	5.4	0	0	0
ENSMUSG00000020412	ASCC2	activating signal cointegrator 1 complex subunit 2	None	transcription, DNA-templated|regulation of transcription, DNA-templated|	None	10	3.7	6.55	10	1.1	5.39	1.1	9.84	0.00735	0.4	4.8	0	0	0
ENSMUSG00000039231	SUV39H1	suppressor of variegation 3-9 homolog 1 (Drosophila)	chromosome, centromeric region|heterochromatin|condensed nuclear chromosome|nucleus|nuclear lamina|nucleoplasm|chromatin silencing complex|rDNA heterochromatin|	chromatin silencing at rDNA|chromatin organization|transcription, DNA-templated|rRNA processing|cell cycle|viral process|cell differentiation|histone H3-K9 dimethylation|histone H3-K9 trimethylation|negative regulation of circadian rhythm|negative regulation of transcription, DNA-templated|rhythmic process|	transcription regulatory region sequence-specific DNA binding|chromatin binding|protein binding|zinc ion binding|S-adenosylmethionine-dependent methyltransferase activity|histone-lysine N-methyltransferase activity|histone methyltransferase activity|histone methyltransferase activity (H3-K9 specific)|protein N-terminus binding|	10	1	2.8	10	1.5	7.86	1.5	9.84	0.00735	0.5	2.7	0	0	0
ENSMUSG00000047720	4922502D21RIK	RIKEN cDNA 4922502D21 gene	cellular_component|	biological_process|	molecular_function|	9	2.6	6.73	10	2.5	3.47	2.6	9.84	0.00735	1	4.9	0	0	0
ENSMUSG00000074375	SULT2A3	sulfotransferase family 2A, dehydroepiandrosterone (DHEA)-preferring, member 3	cellular_component|cytoplasm|cytosol|	biological_process|	alcohol sulfotransferase activity|drug binding|sulfotransferase activity|transferase activity|3'-phosphoadenosine 5'-phosphosulfate binding|	10	3.1	9.07	10	0.7	1.22	2.3	9.84	0.00735	0.7	4.6	0	0	0
ENSMUSG00000047854	STX19	syntaxin 19	integral component of membrane|	intracellular protein transport|vesicle-mediated transport|	SNAP receptor activity|protein binding|	8	1.6	9.66	9	0.6	1.16	1.6	9.83	0.00737	0.5	3	0	0	0
ENSMUSG00000003604	AVEN	apoptosis, caspase activation inhibitor	intracellular|endomembrane system|membrane|	apoptotic process|negative regulation of apoptotic process|	protein binding|	9	1.4	6.5	8	1	3.92	1.3	9.83	0.00737	0.5	2.4	0	0	0
ENSMUSG00000024660	INCENP	inner centromere protein antigens 135/155kDa	chromosome, centromeric region|kinetochore|condensed chromosome kinetochore|lateral element|central element|centromeric heterochromatin|spindle|cytosol|microtubule|chromocenter|midbody|protein complex|	mitotic cell cycle|cytokinesis|chromosome segregation|mitotic nuclear division|	protein binding|	5	1.6	0.481	5	1.8	9.62	1.7	9.83	0.00737	0.9	3.7	0	0	0
ENSMUSG00000029472	ANAPC5	anaphase promoting complex subunit 5	nucleus|nucleoplasm|anaphase-promoting complex|cytosol|	G2/M transition of mitotic cell cycle|mitotic anaphase|mitotic cell cycle|ubiquitin-dependent protein catabolic process|mitotic nuclear division|mitotic spindle assembly checkpoint|anaphase-promoting complex-dependent proteasomal ubiquitin-dependent protein catabolic process|negative regulation of ubiquitin-protein ligase activity involved in mitotic cell cycle|positive regulation of ubiquitin-pr…	ubiquitin-protein transferase activity|protein phosphatase binding|	7	1.2	6.64	6	1.2	3.55	1.2	9.83	0.00737	0.6	2.6	0	0	0
ENSMUSG00000037916	NDUFV1	NADH dehydrogenase (ubiquinone) flavoprotein 1, 51kDa	mitochondrial inner membrane|mitochondrial inner membrane|mitochondrial respiratory chain complex I|mitochondrial respiratory chain complex I|mitochondrial respiratory chain complex I|	mitochondrial electron transport, NADH to ubiquinone|mitochondrial electron transport, NADH to ubiquinone|respiratory electron transport chain|cellular metabolic process|small molecule metabolic process|	NADH dehydrogenase (ubiquinone) activity|FMN binding|metal ion binding|NAD binding|4 iron, 4 sulfur cluster binding|	8	2	6.59	9	1.7	3.73	1.8	9.83	0.00737	0.8	3.4	0	0	0
ENSMUSG00000056089	GM5468	predicted gene 5468	None	None	None	7	3.9	10.4	9	1.8	1.95	3.8	9.81	0.00742	1.6	7.4	0	0	0
ENSMUSG00000058921	SLC10A5	solute carrier family 10, member 5	integral component of membrane|	sodium ion transport|bile acid and bile salt transport|transmembrane transport|	bile acid:sodium symporter activity|	9	1.1	2.4	9	2.4	10.2	2.3	9.79	0.00749	0.8	4.2	0	0	0
ENSMUSG00000037820	TGM2	transglutaminase 2	mitochondrion|cytosol|plasma membrane|extracellular vesicular exosome|	blood vessel remodeling|isopeptide cross-linking via N6-(L-isoglutamyl)-L-lysine|negative regulation of endoplasmic reticulum calcium ion concentration|positive regulation of apoptotic process|positive regulation of I-kappaB kinase/NF-kappaB signaling|apoptotic cell clearance|positive regulation of cell adhesion|positive regulation of smooth muscle cell proliferation|positive regulation of inflam…	protein-glutamine gamma-glutamyltransferase activity|protein-glutamine gamma-glutamyltransferase activity|protein binding|GTP binding|protein domain specific binding|metal ion binding|	8	-0.9	1.39	10	2.1	10.4	1.5	9.79	0.00749	0.5	3.6	0	0	0
ENSMUSG00000032744	HEYL	hes-related family bHLH transcription factor with YRPW motif-like	nucleus|nucleoplasm|cytoplasm|	negative regulation of transcription from RNA polymerase II promoter|outflow tract morphogenesis|atrioventricular valve morphogenesis|pulmonary valve morphogenesis|epithelial to mesenchymal transition involved in endocardial cushion formation|endocardial cushion morphogenesis|cardiac ventricle morphogenesis|transcription from RNA polymerase II promoter|transcription from RNA polymerase II promote…	RNA polymerase II core promoter sequence-specific DNA binding|RNA polymerase II core promoter sequence-specific DNA binding transcription factor activity|protein binding transcription factor activity|RNA polymerase II core promoter proximal region sequence-specific DNA binding transcription factor activity involved in positive regulation of transcription|RNA polymerase II transcription corepresso…	9	1.7	4.32	10	2.5	6.3	1.8	9.79	0.00749	0.6	4.2	0	0	0
ENSMUSG00000024902	MRPL11	mitochondrial ribosomal protein L11	mitochondrial ribosome|	translation|	structural constituent of ribosome|protein binding|poly(A) RNA binding|	7	1.3	3.9	8	1.6	6.44	1.5	9.78	0.00751	0.7	2.7	0	0	0
ENSMUSG00000061616	OLFR12	olfactory receptor 12	plasma membrane|membrane|integral component of membrane|	signal transduction|G-protein coupled receptor signaling pathway|sensory perception of smell|response to stimulus|detection of chemical stimulus involved in sensory perception of smell|	signal transducer activity|G-protein coupled receptor activity|olfactory receptor activity|	10	-1.6	6.31	10	-1.3	3.96	-1.4	9.77	0.00754	-3	-0.4	0	0	0
ENSMUSG00000029050	SKI	SKI proto-oncogene	nucleus|nucleoplasm|transcription factor complex|cytoplasm|cytoplasm|centrosome|nuclear body|PML body|transcriptional repressor complex|protein complex|	negative regulation of transcription from RNA polymerase II promoter|negative regulation of transcription from RNA polymerase II promoter|negative regulation of transcription from RNA polymerase II promoter|neural tube closure|lens morphogenesis in camera-type eye|transcription, DNA-templated|transcription, DNA-templated|transcription initiation from RNA polymerase II promoter|transforming growth…	chromatin binding|transcription corepressor activity|transcription corepressor activity|protein binding|zinc ion binding|protein kinase binding|protein domain specific binding|ubiquitin protein ligase binding|SMAD binding|histone deacetylase inhibitor activity|repressing transcription factor binding|	10	-0.9	2.97	10	-1.3	7.64	-1.1	9.76	0.00756	-2.2	-0.4	0	0	0
ENSMUSG00000095829	SPEER1-PS1	spermatogenesis associated glutamate (E)-rich protein 1, pseudogene 1	None	None	None	7	1.9	6.15	8	1.7	3.99	1.8	9.76	0.00756	0.8	3.4	0	0	0
ENSMUSG00000069899	GM12166	SFT2 domain containing 1 pseudogene	cellular_component|	biological_process|	molecular_function|	9	0.8	1.4	10	1.8	9.19	1.7	9.75	0.00759	0.6	3.2	0	0	0
ENSMUSG00000029014	DNAJC2	DnaJ (Hsp40) homolog, subfamily C, member 2	nucleus|cytoplasm|cytosol|nuclear membrane|	DNA replication|transcription, DNA-templated|chromatin modification|negative regulation of cell growth|positive regulation of transcription, DNA-templated|'de novo' cotranslational protein folding|negative regulation of DNA biosynthetic process|	DNA binding|chromatin binding|Hsp70 protein binding|histone binding|ubiquitin binding|poly(A) RNA binding|	8	0.8	0.785	7	2.2	10.7	1.9	9.75	0.00759	0.7	4	0	0	0
ENSMUSG00000034973	DOPEY1	dopey family member 1	None	protein transport|	None	10	2	7.43	10	1.9	2.7	2	9.75	0.00759	0.6	3.6	0	0	0
ENSMUSG00000022031	ELP3	elongator acetyltransferase complex subunit 3	nucleolus|cytoplasm|transcription elongation factor complex|DNA-directed RNA polymerase II, holoenzyme|Elongator holoenzyme complex|	chromatin organization|regulation of transcription from RNA polymerase II promoter|regulation of transcription from RNA polymerase II promoter|transcription elongation from RNA polymerase II promoter|histone acetylation|positive regulation of cell migration|regulation of protein kinase activity|	DNA binding|histone acetyltransferase activity|protein binding|phosphorylase kinase regulator activity|metal ion binding|iron-sulfur cluster binding|	6	1.9	10.2	6	0.9	0.467	1.8	9.74	0.00762	0.7	3.5	0	0	0
ENSMUSG00000035161	INTS6	integrator complex subunit 6	nucleus|actin cytoskeleton|integrator complex|	signal transduction|snRNA processing|	transmembrane signaling receptor activity|protein binding|	10	-0.9	3.56	10	-1.5	7.05	-1.1	9.74	0.00762	-2.5	-0.4	0	0	0
ENSMUSG00000029685	ASB15	ankyrin repeat and SOCS box containing 15	None	protein ubiquitination|intracellular signal transduction|	None	9	1.4	2.92	10	1.4	7.15	1.4	9.73	0.00764	0.6	3.1	0	0	0
ENSMUSG00000074486	BGLAP2	bone gamma-carboxyglutamate protein 2	extracellular region|extracellular space|extracellular space|cytoplasm|rough endoplasmic reticulum|Golgi apparatus|dendrite|membrane-bounded vesicle|cell projection|perikaryon|	regulation of bone mineralization|pancreas development|biomineral tissue development|positive regulation of insulin secretion|cellular response to insulin stimulus|cellular response to insulin stimulus|glucose homeostasis|cellular lipid catabolic process|type B pancreatic cell proliferation|	calcium ion binding|structural constituent of bone|hydroxyapatite binding|metal ion binding|	9	3.4	7.9	10	2.2	3	2.5	9.73	0.00764	0.7	5.6	0	0	0
ENSMUSG00000015757	PPIL4	peptidylprolyl isomerase (cyclophilin)-like 4	nucleus|	protein peptidyl-prolyl isomerization|protein folding|	nucleotide binding|peptidyl-prolyl cis-trans isomerase activity|poly(A) RNA binding|	6	1	1.11	6	1.9	9.96	1.8	9.72	0.00767	0.7	3.5	0	0	0
ENSMUSG00000024335	BRD2	bromodomain containing 2	nucleus|cytoplasm|	nucleosome assembly|transcription, DNA-templated|regulation of transcription from RNA polymerase II promoter|spermatogenesis|chromatin modification|	chromatin binding|protein binding|lysine-acetylated histone binding|	5	2.1	7.13	5	1.5	3.27	2	9.72	0.00767	0.9	3.8	0	0	0
ENSMUSG00000025838	PRAMEL6	preferentially expressed antigen in melanoma like 6	cellular_component|	biological_process|	molecular_function|	9	1.8	10.1	8	0.9	0.401	1.6	9.71	0.0077	0.7	3.7	0	0	0
ENSMUSG00000074754	GM561	predicted gene 561	mitochondrion|	biological_process|	molecular_function|	10	0	0	10	2.4	12	2.3	9.71	0.0077	1.2	5	0	0	0
ENSMUSG00000032350	GCLC	glutamate-cysteine ligase, catalytic subunit	cytoplasm|cytosol|glutamate-cysteine ligase complex|	sulfur amino acid metabolic process|cysteine metabolic process|glutamate metabolic process|glutathione biosynthetic process|glutathione biosynthetic process|glutathione biosynthetic process|glutathione biosynthetic process|xenobiotic metabolic process|response to oxidative stress|apoptotic mitochondrial changes|response to heat|response to hormone|L-ascorbic acid metabolic process|negative regula…	magnesium ion binding|glutamate-cysteine ligase activity|glutamate-cysteine ligase activity|ATP binding|glutamate binding|ADP binding|protein heterodimerization activity|coenzyme binding|	9	1.4	1.28	8	2	8.99	1.9	9.7	0.00773	0.6	3.8	0	0	0
ENSMUSG00000031552	ADAM18	ADAM metallopeptidase domain 18	membrane|integral component of membrane|	proteolysis|multicellular organismal development|spermatogenesis|cell differentiation|	metalloendopeptidase activity|metallopeptidase activity|zinc ion binding|	9	1.6	10.1	9	0.9	0.473	1.5	9.69	0.00775	0.7	2.7	0	0	0
ENSMUSG00000097853	GM3532	predicted gene 3532	None	None	None	8	0.2	0.174	10	2.1	12.2	2	9.69	0.00775	0.8	4	0	0	0
ENSMUSG00000079380	GM8271	predicted gene 8271	cellular_component|	biological_process|	molecular_function|	8	0.2	0.174	10	2.1	12.2	2	9.69	0.00775	0.8	4	0	0	0
ENSMUSG00000031753	COG4	component of oligomeric golgi complex 4	Golgi membrane|Golgi transport complex|	retrograde vesicle-mediated transport, Golgi to ER|Golgi organization|protein transport|Golgi vesicle prefusion complex stabilization|	protein binding|	7	1.3	4.57	8	1.3	5.47	1.3	9.68	0.00777	0.5	2.8	0	0	0
ENSMUSG00000027752	EXOSC8	exosome component 8	exosome (RNase complex)|nucleus|nucleolus|cytoplasm|cytosol|	nuclear-transcribed mRNA catabolic process, deadenylation-dependent decay|rRNA processing|biological_process|gene expression|RNA metabolic process|mRNA metabolic process|exonucleolytic nuclear-transcribed mRNA catabolic process involved in deadenylation-dependent decay|	protein binding|AU-rich element binding|	8	1.7	5.54	9	1.7	4.5	1.7	9.68	0.00777	0.7	3.3	0	0	0
ENSMUSG00000028975	PEX14	peroxisomal biogenesis factor 14	intracellular|nucleus|nucleolus|peroxisome|peroxisomal membrane|peroxisomal membrane|membrane|integral component of membrane|intracellular membrane-bounded organelle|protein complex|protein complex|	protein complex assembly|peroxisome organization|protein import into peroxisome matrix|protein import into peroxisome matrix, translocation|negative regulation of protein binding|microtubule anchoring|peroxisome transport along microtubule|negative regulation of sequence-specific DNA binding transcription factor activity|protein import into peroxisome matrix, substrate release|negative regulation…	transcription corepressor activity|receptor binding|protein binding|microtubule binding|protein N-terminus binding|beta-tubulin binding|	10	-1	5.79	9	-1.2	4.35	-1.1	9.68	0.00777	-2.1	-0.4	0	0	0
ENSMUSG00000000037	SCML2	sex comb on midleg-like 2 (Drosophila)	nucleus|PcG protein complex|	transcription, DNA-templated|regulation of transcription, DNA-templated|anatomical structure morphogenesis|	DNA binding|sequence-specific DNA binding transcription factor activity|	9	1.7	7.59	9	3.3	3.92	1.7	9.67	0.0078	0.5	4.3	0	0	0
[truncated: 22,012 more rows]

## Sheet: Fig. 4c
#GeneID	Symbol	GeneInfo	Localization	Process	Function	# elements 1	casTLE Effect 1	casTLE Score 1	# elements 2	casTLE Effect 2	casTLE Score 2	Combo casTLE Effect	Combo casTLE Score	casTLE p-value	Minimum Effect Estimate	Maximum Effect Estimate	10% FDR	5% FDR	1% FDR
[truncated: 22,894 more rows]
